# Supplementary material for: Understanding the hydrologic impacts of wastewater treatment plant discharge to shallow groundwater: before and after plant shutdown
Source: Royal Society of Chemistry journal article supplement (doi:10.1039/c6ew00128a), 2016-01-01
Supplement: c6ew00128a1.zip [file c6ew00128a1.zip]

| datetime.flow   | Flow.cms    | datetime.precip | precip.cm | Date.DV    | medianDV.cms |
|-----------------|-------------|-----------------|-----------|------------|--------------|
| 10/1/2013 0:00  | 0.215208034 | 10/1/2013 0:00  | 0         | 10/1/2013  | 0.3398016    |
| 10/1/2013 0:15  | 0.215208034 | 10/1/2013 0:10  | 0         | 10/2/2013  | 0.3398016    |
| 10/1/2013 0:30  | 0.209544665 | 10/1/2013 0:20  | 0         | 10/3/2013  | 0.283168     |
| 10/1/2013 0:45  | 0.209544665 | 10/1/2013 0:30  | 0         | 10/4/2013  | 0.4530688    |
| 10/1/2013 1:00  | 0.203881296 | 10/1/2013 0:40  | 0         | 10/5/2013  | 0.3964352    |
| 10/1/2013 1:15  | 0.195386242 | 10/1/2013 0:50  | 0         | 10/6/2013  | 0.4530688    |
| 10/1/2013 1:30  | 0.195386242 | 10/1/2013 1:00  | 0         | 10/7/2013  | 0.3964352    |
| 10/1/2013 1:45  | 0.195386242 | 10/1/2013 1:10  | 0         | 10/8/2013  | 0.3964352    |
| 10/1/2013 2:00  | 0.186891188 | 10/1/2013 1:20  | 0         | 10/9/2013  | 0.3964352    |
| 10/1/2013 2:15  | 0.186891188 | 10/1/2013 1:30  | 0         | 10/10/2013 | 0.3964352    |
| 10/1/2013 2:30  | 0.186891188 | 10/1/2013 1:40  | 0         | 10/11/2013 | 0.424752     |
| 10/1/2013 2:45  | 0.186891188 | 10/1/2013 1:50  | 0         | 10/12/2013 | 0.566336     |
| 10/1/2013 3:00  | 0.178396134 | 10/1/2013 2:00  | 0         | 10/13/2013 | 0.424752     |
| 10/1/2013 3:15  | 0.178396134 | 10/1/2013 2:10  | 0         | 10/14/2013 | 0.4813856    |
| 10/1/2013 3:30  | 0.16990108  | 10/1/2013 2:20  | 0         | 10/15/2013 | 0.3964352    |
| 10/1/2013 3:45  | 0.172732764 | 10/1/2013 2:30  | 0         | 10/16/2013 | 0.3964352    |
| 10/1/2013 4:00  | 0.16423771  | 10/1/2013 2:40  | 0         | 10/17/2013 | 0.3964352    |
| 10/1/2013 4:15  | 0.16990108  | 10/1/2013 2:50  | 0         | 10/18/2013 | 0.424752     |
| 10/1/2013 4:30  | 0.16423771  | 10/1/2013 3:00  | 0         | 10/19/2013 | 0.424752     |
| 10/1/2013 4:45  | 0.161406026 | 10/1/2013 3:10  | 0         | 10/20/2013 | 0.424752     |
| 10/1/2013 5:00  | 0.161406026 | 10/1/2013 3:20  | 0         | 10/21/2013 | 0.4813856    |
| 10/1/2013 5:15  | 0.161406026 | 10/1/2013 3:30  | 0         | 10/22/2013 | 0.4530688    |
| 10/1/2013 5:30  | 0.16423771  | 10/1/2013 3:40  | 0         | 10/23/2013 | 0.4813856    |
| 10/1/2013 5:45  | 0.16423771  | 10/1/2013 3:50  | 0         | 10/24/2013 | 0.4813856    |
| 10/1/2013 6:00  | 0.16423771  | 10/1/2013 4:00  | 0         | 10/25/2013 | 0.4530688    |
| 10/1/2013 6:15  | 0.161406026 | 10/1/2013 4:10  | 0         | 10/26/2013 | 0.6796032    |
| 10/1/2013 6:30  | 0.161406026 | 10/1/2013 4:20  | 0         | 10/27/2013 | 0.6512864    |
| 10/1/2013 6:45  | 0.161406026 | 10/1/2013 4:30  | 0         | 10/28/2013 | 0.6229696    |
| 10/1/2013 7:00  | 0.16423771  | 10/1/2013 4:40  | 0         | 10/29/2013 | 0.6512864    |
| 10/1/2013 7:15  | 0.16423771  | 10/1/2013 4:50  | 0         | 10/30/2013 | 0.6796032    |
| 10/1/2013 7:30  | 0.178396134 | 10/1/2013 5:00  | 0         | 10/31/2013 | 0.6229696    |
| 10/1/2013 7:45  | 0.181227818 | 10/1/2013 5:10  | 0         | 11/1/2013  | 0.7645536    |
| 10/1/2013 8:00  | 0.181227818 | 10/1/2013 5:20  | 0         | 11/2/2013  | 0.7362368    |
| 10/1/2013 8:15  | 0.189722872 | 10/1/2013 5:30  | 0         | 11/3/2013  | 0.849504     |
| 10/1/2013 8:30  | 0.201049611 | 10/1/2013 5:40  | 0         | 11/4/2013  | 0.7928704    |
| 10/1/2013 8:45  | 0.209544665 | 10/1/2013 5:50  | 0         | 11/5/2013  | 0.7928704    |
| 10/1/2013 9:00  | 0.215208034 | 10/1/2013 6:00  | 0         | 11/6/2013  | 0.7362368    |
| 10/1/2013 9:15  | 0.215208034 | 10/1/2013 6:10  | 0         | 11/7/2013  | 0.6796032    |
| 10/1/2013 9:30  | 0.223703088 | 10/1/2013 6:20  | 0         | 11/8/2013  | 0.6512864    |
| 10/1/2013 9:45  | 0.229366457 | 10/1/2013 6:30  | 0         | 11/9/2013  | 0.7645536    |
| 10/1/2013 10:00 | 0.223703088 | 10/1/2013 6:40  | 0         | 11/10/2013 | 0.6796032    |
| 10/1/2013 10:15 | 0.223703088 | 10/1/2013 6:50  | 0         | 11/11/2013 | 0.6796032    |
| 10/1/2013 10:30 | 0.229366457 | 10/1/2013 7:00  | 0         | 11/12/2013 | 0.5946528    |
| 10/1/2013 10:45 | 0.229366457 | 10/1/2013 7:10  | 0         | 11/13/2013 | 0.6796032    |
| 10/1/2013 11:00 | 0.218039719 | 10/1/2013 7:20  | 0         | 11/14/2013 | 0.6512864    |
| 10/1/2013 11:15 | 0.218039719 | 10/1/2013 7:30  | 0         | 11/15/2013 | 0.566336     |

|                 |             |                 |   |            |           |
|-----------------|-------------|-----------------|---|------------|-----------|
| 10/1/2013 11:30 | 0.218039719 | 10/1/2013 7:40  | 0 | 11/16/2013 | 0.5946528 |
| 10/1/2013 11:45 | 0.215208034 | 10/1/2013 7:50  | 0 | 11/17/2013 | 0.4813856 |
| 10/1/2013 12:00 | 0.215208034 | 10/1/2013 8:00  | 0 | 11/18/2013 | 0.4813856 |
| 10/1/2013 12:15 | 0.215208034 | 10/1/2013 8:10  | 0 | 11/19/2013 | 0.5946528 |
| 10/1/2013 12:30 | 0.215208034 | 10/1/2013 8:20  | 0 | 11/20/2013 | 0.4813856 |
| 10/1/2013 12:45 | 0.215208034 | 10/1/2013 8:30  | 0 | 11/21/2013 | 0.4530688 |
| 10/1/2013 13:00 | 0.209544665 | 10/1/2013 8:40  | 0 | 11/22/2013 | 0.4813856 |
| 10/1/2013 13:15 | 0.209544665 | 10/1/2013 8:50  | 0 | 11/23/2013 | 0.566336  |
| 10/1/2013 13:30 | 0.209544665 | 10/1/2013 9:00  | 0 | 11/24/2013 | 0.5946528 |
| 10/1/2013 13:45 | 0.209544665 | 10/1/2013 9:10  | 0 | 11/25/2013 | 0.5946528 |
| 10/1/2013 14:00 | 0.203881296 | 10/1/2013 9:20  | 0 | 11/26/2013 | 0.5380192 |
| 10/1/2013 14:15 | 0.203881296 | 10/1/2013 9:30  | 0 | 11/27/2013 | 0.5097024 |
| 10/1/2013 14:30 | 0.201049611 | 10/1/2013 9:40  | 0 | 11/28/2013 | 0.7645536 |
| 10/1/2013 14:45 | 0.201049611 | 10/1/2013 9:50  | 0 | 11/29/2013 | 0.7362368 |
| 10/1/2013 15:00 | 0.201049611 | 10/1/2013 10:00 | 0 | 11/30/2013 | 0.6512864 |
| 10/1/2013 15:15 | 0.201049611 | 10/1/2013 10:10 | 0 | 12/1/2013  | 0.566336  |
| 10/1/2013 15:30 | 0.195386242 | 10/1/2013 10:20 | 0 |            |           |
| 10/1/2013 15:45 | 0.195386242 | 10/1/2013 10:30 | 0 |            |           |
| 10/1/2013 16:00 | 0.189722872 | 10/1/2013 10:40 | 0 |            |           |
| 10/1/2013 16:15 | 0.195386242 | 10/1/2013 10:50 | 0 |            |           |
| 10/1/2013 16:30 | 0.195386242 | 10/1/2013 11:00 | 0 |            |           |
| 10/1/2013 16:45 | 0.201049611 | 10/1/2013 11:10 | 0 |            |           |
| 10/1/2013 17:00 | 0.201049611 | 10/1/2013 11:20 | 0 |            |           |
| 10/1/2013 17:15 | 0.195386242 | 10/1/2013 11:30 | 0 |            |           |
| 10/1/2013 17:30 | 0.189722872 | 10/1/2013 11:40 | 0 |            |           |
| 10/1/2013 17:45 | 0.195386242 | 10/1/2013 11:50 | 0 |            |           |
| 10/1/2013 18:00 | 0.195386242 | 10/1/2013 12:00 | 0 |            |           |
| 10/1/2013 18:15 | 0.195386242 | 10/1/2013 12:10 | 0 |            |           |
| 10/1/2013 18:30 | 0.195386242 | 10/1/2013 12:20 | 0 |            |           |
| 10/1/2013 18:45 | 0.201049611 | 10/1/2013 12:30 | 0 |            |           |
| 10/1/2013 19:00 | 0.201049611 | 10/1/2013 12:40 | 0 |            |           |
| 10/1/2013 19:15 | 0.201049611 | 10/1/2013 12:50 | 0 |            |           |
| 10/1/2013 19:30 | 0.195386242 | 10/1/2013 13:00 | 0 |            |           |
| 10/1/2013 19:45 | 0.195386242 | 10/1/2013 13:10 | 0 |            |           |
| 10/1/2013 20:00 | 0.195386242 | 10/1/2013 13:20 | 0 |            |           |
| 10/1/2013 20:15 | 0.203881296 | 10/1/2013 13:30 | 0 |            |           |
| 10/1/2013 20:30 | 0.203881296 | 10/1/2013 13:40 | 0 |            |           |
| 10/1/2013 20:45 | 0.209544665 | 10/1/2013 13:50 | 0 |            |           |
| 10/1/2013 21:00 | 0.203881296 | 10/1/2013 14:00 | 0 |            |           |
| 10/1/2013 21:15 | 0.209544665 | 10/1/2013 14:10 | 0 |            |           |
| 10/1/2013 21:30 | 0.215208034 | 10/1/2013 14:20 | 0 |            |           |
| 10/1/2013 21:45 | 0.209544665 | 10/1/2013 14:30 | 0 |            |           |
| 10/1/2013 22:00 | 0.215208034 | 10/1/2013 14:40 | 0 |            |           |
| 10/1/2013 22:15 | 0.218039719 | 10/1/2013 14:50 | 0 |            |           |
| 10/1/2013 22:30 | 0.215208034 | 10/1/2013 15:00 | 0 |            |           |
| 10/1/2013 22:45 | 0.218039719 | 10/1/2013 15:10 | 0 |            |           |
| 10/1/2013 23:00 | 0.218039719 | 10/1/2013 15:20 | 0 |            |           |

|                 |             |                 |   |
|-----------------|-------------|-----------------|---|
| 10/1/2013 23:15 | 0.218039719 | 10/1/2013 15:30 | 0 |
| 10/1/2013 23:30 | 0.215208034 | 10/1/2013 15:40 | 0 |
| 10/1/2013 23:45 | 0.218039719 | 10/1/2013 15:50 | 0 |
| 10/2/2013 0:00  | 0.218039719 | 10/1/2013 16:00 | 0 |
| 10/2/2013 0:15  | 0.215208034 | 10/1/2013 16:10 | 0 |
| 10/2/2013 0:30  | 0.209544665 | 10/1/2013 16:20 | 0 |
| 10/2/2013 0:45  | 0.203881296 | 10/1/2013 16:30 | 0 |
| 10/2/2013 1:00  | 0.203881296 | 10/1/2013 16:40 | 0 |
| 10/2/2013 1:15  | 0.201049611 | 10/1/2013 16:50 | 0 |
| 10/2/2013 1:30  | 0.195386242 | 10/1/2013 17:00 | 0 |
| 10/2/2013 1:45  | 0.195386242 | 10/1/2013 17:10 | 0 |
| 10/2/2013 2:00  | 0.189722872 | 10/1/2013 17:20 | 0 |
| 10/2/2013 2:15  | 0.186891188 | 10/1/2013 17:30 | 0 |
| 10/2/2013 2:30  | 0.186891188 | 10/1/2013 17:40 | 0 |
| 10/2/2013 2:45  | 0.181227818 | 10/1/2013 17:50 | 0 |
| 10/2/2013 3:00  | 0.172732764 | 10/1/2013 18:00 | 0 |
| 10/2/2013 3:15  | 0.172732764 | 10/1/2013 18:10 | 0 |
| 10/2/2013 3:30  | 0.172732764 | 10/1/2013 18:20 | 0 |
| 10/2/2013 3:45  | 0.172732764 | 10/1/2013 18:30 | 0 |
| 10/2/2013 4:00  | 0.172732764 | 10/1/2013 18:40 | 0 |
| 10/2/2013 4:15  | 0.172732764 | 10/1/2013 18:50 | 0 |
| 10/2/2013 4:30  | 0.16990108  | 10/1/2013 19:00 | 0 |
| 10/2/2013 4:45  | 0.16990108  | 10/1/2013 19:10 | 0 |
| 10/2/2013 5:00  | 0.161406026 | 10/1/2013 19:20 | 0 |
| 10/2/2013 5:15  | 0.16423771  | 10/1/2013 19:30 | 0 |
| 10/2/2013 5:30  | 0.161406026 | 10/1/2013 19:40 | 0 |
| 10/2/2013 5:45  | 0.161406026 | 10/1/2013 19:50 | 0 |
| 10/2/2013 6:00  | 0.161406026 | 10/1/2013 20:00 | 0 |
| 10/2/2013 6:15  | 0.161406026 | 10/1/2013 20:10 | 0 |
| 10/2/2013 6:30  | 0.161406026 | 10/1/2013 20:20 | 0 |
| 10/2/2013 6:45  | 0.16423771  | 10/1/2013 20:30 | 0 |
| 10/2/2013 7:00  | 0.16423771  | 10/1/2013 20:40 | 0 |
| 10/2/2013 7:15  | 0.16990108  | 10/1/2013 20:50 | 0 |
| 10/2/2013 7:30  | 0.16990108  | 10/1/2013 21:00 | 0 |
| 10/2/2013 7:45  | 0.172732764 | 10/1/2013 21:10 | 0 |
| 10/2/2013 8:00  | 0.181227818 | 10/1/2013 21:20 | 0 |
| 10/2/2013 8:15  | 0.189722872 | 10/1/2013 21:30 | 0 |
| 10/2/2013 8:30  | 0.195386242 | 10/1/2013 21:40 | 0 |
| 10/2/2013 8:45  | 0.203881296 | 10/1/2013 21:50 | 0 |
| 10/2/2013 9:00  | 0.209544665 | 10/1/2013 22:00 | 0 |
| 10/2/2013 9:15  | 0.215208034 | 10/1/2013 22:10 | 0 |
| 10/2/2013 9:30  | 0.215208034 | 10/1/2013 22:20 | 0 |
| 10/2/2013 9:45  | 0.223703088 | 10/1/2013 22:30 | 0 |
| 10/2/2013 10:00 | 0.229366457 | 10/1/2013 22:40 | 0 |
| 10/2/2013 10:15 | 0.223703088 | 10/1/2013 22:50 | 0 |
| 10/2/2013 10:30 | 0.229366457 | 10/1/2013 23:00 | 0 |
| 10/2/2013 10:45 | 0.229366457 | 10/1/2013 23:10 | 0 |

|                 |             |                 |   |
|-----------------|-------------|-----------------|---|
| 10/2/2013 11:00 | 0.223703088 | 10/1/2013 23:20 | 0 |
| 10/2/2013 11:15 | 0.223703088 | 10/1/2013 23:30 | 0 |
| 10/2/2013 11:30 | 0.223703088 | 10/1/2013 23:40 | 0 |
| 10/2/2013 11:45 | 0.218039719 | 10/1/2013 23:50 | 0 |
| 10/2/2013 12:00 | 0.218039719 | 10/2/2013 0:00  | 0 |
| 10/2/2013 12:15 | 0.215208034 | 10/2/2013 0:10  | 0 |
| 10/2/2013 12:30 | 0.209544665 | 10/2/2013 0:20  | 0 |
| 10/2/2013 12:45 | 0.209544665 | 10/2/2013 0:30  | 0 |
| 10/2/2013 13:00 | 0.209544665 | 10/2/2013 0:40  | 0 |
| 10/2/2013 13:15 | 0.209544665 | 10/2/2013 0:50  | 0 |
| 10/2/2013 13:30 | 0.203881296 | 10/2/2013 1:00  | 0 |
| 10/2/2013 13:45 | 0.203881296 | 10/2/2013 1:10  | 0 |
| 10/2/2013 14:00 | 0.201049611 | 10/2/2013 1:20  | 0 |
| 10/2/2013 14:15 | 0.201049611 | 10/2/2013 1:30  | 0 |
| 10/2/2013 14:30 | 0.203881296 | 10/2/2013 1:40  | 0 |
| 10/2/2013 14:45 | 0.201049611 | 10/2/2013 1:50  | 0 |
| 10/2/2013 15:00 | 0.201049611 | 10/2/2013 2:00  | 0 |
| 10/2/2013 15:15 | 0.203881296 | 10/2/2013 2:10  | 0 |
| 10/2/2013 15:30 | 0.195386242 | 10/2/2013 2:20  | 0 |
| 10/2/2013 15:45 | 0.201049611 | 10/2/2013 2:30  | 0 |
| 10/2/2013 16:00 | 0.201049611 | 10/2/2013 2:40  | 0 |
| 10/2/2013 16:15 | 0.201049611 | 10/2/2013 2:50  | 0 |
| 10/2/2013 16:30 | 0.201049611 | 10/2/2013 3:00  | 0 |
| 10/2/2013 16:45 | 0.189722872 | 10/2/2013 3:10  | 0 |
| 10/2/2013 17:00 | 0.195386242 | 10/2/2013 3:20  | 0 |
| 10/2/2013 17:15 | 0.201049611 | 10/2/2013 3:30  | 0 |
| 10/2/2013 17:30 | 0.195386242 | 10/2/2013 3:40  | 0 |
| 10/2/2013 17:45 | 0.201049611 | 10/2/2013 3:50  | 0 |
| 10/2/2013 18:00 | 0.195386242 | 10/2/2013 4:00  | 0 |
| 10/2/2013 18:15 | 0.201049611 | 10/2/2013 4:10  | 0 |
| 10/2/2013 18:30 | 0.189722872 | 10/2/2013 4:20  | 0 |
| 10/2/2013 18:45 | 0.201049611 | 10/2/2013 4:30  | 0 |
| 10/2/2013 19:00 | 0.201049611 | 10/2/2013 4:40  | 0 |
| 10/2/2013 19:15 | 0.203881296 | 10/2/2013 4:50  | 0 |
| 10/2/2013 19:30 | 0.203881296 | 10/2/2013 5:00  | 0 |
| 10/2/2013 19:45 | 0.203881296 | 10/2/2013 5:10  | 0 |
| 10/2/2013 20:00 | 0.203881296 | 10/2/2013 5:20  | 0 |
| 10/2/2013 20:15 | 0.209544665 | 10/2/2013 5:30  | 0 |
| 10/2/2013 20:30 | 0.215208034 | 10/2/2013 5:40  | 0 |
| 10/2/2013 20:45 | 0.215208034 | 10/2/2013 5:50  | 0 |
| 10/2/2013 21:00 | 0.215208034 | 10/2/2013 6:00  | 0 |
| 10/2/2013 21:15 | 0.215208034 | 10/2/2013 6:10  | 0 |
| 10/2/2013 21:30 | 0.223703088 | 10/2/2013 6:20  | 0 |
| 10/2/2013 21:45 | 0.218039719 | 10/2/2013 6:30  | 0 |
| 10/2/2013 22:00 | 0.218039719 | 10/2/2013 6:40  | 0 |
| 10/2/2013 22:15 | 0.223703088 | 10/2/2013 6:50  | 0 |
| 10/2/2013 22:30 | 0.229366457 | 10/2/2013 7:00  | 0 |

|                 |             |                 |   |
|-----------------|-------------|-----------------|---|
| 10/2/2013 22:45 | 0.229366457 | 10/2/2013 7:10  | 0 |
| 10/2/2013 23:00 | 0.229366457 | 10/2/2013 7:20  | 0 |
| 10/2/2013 23:15 | 0.229366457 | 10/2/2013 7:30  | 0 |
| 10/2/2013 23:30 | 0.223703088 | 10/2/2013 7:40  | 0 |
| 10/2/2013 23:45 | 0.223703088 | 10/2/2013 7:50  | 0 |
| 10/3/2013 0:00  | 0.215208034 | 10/2/2013 8:00  | 0 |
| 10/3/2013 0:15  | 0.218039719 | 10/2/2013 8:10  | 0 |
| 10/3/2013 0:30  | 0.209544665 | 10/2/2013 8:20  | 0 |
| 10/3/2013 0:45  | 0.209544665 | 10/2/2013 8:30  | 0 |
| 10/3/2013 1:00  | 0.203881296 | 10/2/2013 8:40  | 0 |
| 10/3/2013 1:15  | 0.201049611 | 10/2/2013 8:50  | 0 |
| 10/3/2013 1:30  | 0.203881296 | 10/2/2013 9:00  | 0 |
| 10/3/2013 1:45  | 0.201049611 | 10/2/2013 9:10  | 0 |
| 10/3/2013 2:00  | 0.195386242 | 10/2/2013 9:20  | 0 |
| 10/3/2013 2:15  | 0.186891188 | 10/2/2013 9:30  | 0 |
| 10/3/2013 2:30  | 0.186891188 | 10/2/2013 9:40  | 0 |
| 10/3/2013 2:45  | 0.186891188 | 10/2/2013 9:50  | 0 |
| 10/3/2013 3:00  | 0.181227818 | 10/2/2013 10:00 | 0 |
| 10/3/2013 3:15  | 0.178396134 | 10/2/2013 10:10 | 0 |
| 10/3/2013 3:30  | 0.178396134 | 10/2/2013 10:20 | 0 |
| 10/3/2013 3:45  | 0.16990108  | 10/2/2013 10:30 | 0 |
| 10/3/2013 4:00  | 0.172732764 | 10/2/2013 10:40 | 0 |
| 10/3/2013 4:15  | 0.16990108  | 10/2/2013 10:50 | 0 |
| 10/3/2013 4:30  | 0.16990108  | 10/2/2013 11:00 | 0 |
| 10/3/2013 4:45  | 0.16423771  | 10/2/2013 11:10 | 0 |
| 10/3/2013 5:00  | 0.16990108  | 10/2/2013 11:20 | 0 |
| 10/3/2013 5:15  | 0.16423771  | 10/2/2013 11:30 | 0 |
| 10/3/2013 5:30  | 0.16423771  | 10/2/2013 11:40 | 0 |
| 10/3/2013 5:45  | 0.16423771  | 10/2/2013 11:50 | 0 |
| 10/3/2013 6:00  | 0.16423771  | 10/2/2013 12:00 | 0 |
| 10/3/2013 6:15  | 0.16423771  | 10/2/2013 12:10 | 0 |
| 10/3/2013 6:30  | 0.161406026 | 10/2/2013 12:20 | 0 |
| 10/3/2013 6:45  | 0.16423771  | 10/2/2013 12:30 | 0 |
| 10/3/2013 7:00  | 0.16423771  | 10/2/2013 12:40 | 0 |
| 10/3/2013 7:15  | 0.16990108  | 10/2/2013 12:50 | 0 |
| 10/3/2013 7:30  | 0.181227818 | 10/2/2013 13:00 | 0 |
| 10/3/2013 7:45  | 0.186891188 | 10/2/2013 13:10 | 0 |
| 10/3/2013 8:00  | 0.189722872 | 10/2/2013 13:20 | 0 |
| 10/3/2013 8:15  | 0.201049611 | 10/2/2013 13:30 | 0 |
| 10/3/2013 8:30  | 0.201049611 | 10/2/2013 13:40 | 0 |
| 10/3/2013 8:45  | 0.215208034 | 10/2/2013 13:50 | 0 |
| 10/3/2013 9:00  | 0.271841727 | 10/2/2013 14:00 | 0 |
| 10/3/2013 9:15  | 0.368119006 | 10/2/2013 14:10 | 0 |
| 10/3/2013 9:30  | 0.368119006 | 10/2/2013 14:20 | 0 |
| 10/3/2013 9:45  | 0.368119006 | 10/2/2013 14:30 | 0 |
| 10/3/2013 10:00 | 0.339802159 | 10/2/2013 14:40 | 0 |
| 10/3/2013 10:15 | 0.311485313 | 10/2/2013 14:50 | 0 |

|                 |             |                 |   |
|-----------------|-------------|-----------------|---|
| 10/3/2013 10:30 | 0.283168466 | 10/2/2013 15:00 | 0 |
| 10/3/2013 10:45 | 0.283168466 | 10/2/2013 15:10 | 0 |
| 10/3/2013 11:00 | 0.277505097 | 10/2/2013 15:20 | 0 |
| 10/3/2013 11:15 | 0.271841727 | 10/2/2013 15:30 | 0 |
| 10/3/2013 11:30 | 0.266178358 | 10/2/2013 15:40 | 0 |
| 10/3/2013 11:45 | 0.260514989 | 10/2/2013 15:50 | 0 |
| 10/3/2013 12:00 | 0.24918825  | 10/2/2013 16:00 | 0 |
| 10/3/2013 12:15 | 0.243524881 | 10/2/2013 16:10 | 0 |
| 10/3/2013 12:30 | 0.240693196 | 10/2/2013 16:20 | 0 |
| 10/3/2013 12:45 | 0.240693196 | 10/2/2013 16:30 | 0 |
| 10/3/2013 13:00 | 0.235029827 | 10/2/2013 16:40 | 0 |
| 10/3/2013 13:15 | 0.229366457 | 10/2/2013 16:50 | 0 |
| 10/3/2013 13:30 | 0.229366457 | 10/2/2013 17:00 | 0 |
| 10/3/2013 13:45 | 0.229366457 | 10/2/2013 17:10 | 0 |
| 10/3/2013 14:00 | 0.235029827 | 10/2/2013 17:20 | 0 |
| 10/3/2013 14:15 | 0.235029827 | 10/2/2013 17:30 | 0 |
| 10/3/2013 14:30 | 0.235029827 | 10/2/2013 17:40 | 0 |
| 10/3/2013 14:45 | 0.240693196 | 10/2/2013 17:50 | 0 |
| 10/3/2013 15:00 | 0.240693196 | 10/2/2013 18:00 | 0 |
| 10/3/2013 15:15 | 0.240693196 | 10/2/2013 18:10 | 0 |
| 10/3/2013 15:30 | 0.235029827 | 10/2/2013 18:20 | 0 |
| 10/3/2013 15:45 | 0.235029827 | 10/2/2013 18:30 | 0 |
| 10/3/2013 16:00 | 0.235029827 | 10/2/2013 18:40 | 0 |
| 10/3/2013 16:15 | 0.235029827 | 10/2/2013 18:50 | 0 |
| 10/3/2013 16:30 | 0.229366457 | 10/2/2013 19:00 | 0 |
| 10/3/2013 16:45 | 0.229366457 | 10/2/2013 19:10 | 0 |
| 10/3/2013 17:00 | 0.229366457 | 10/2/2013 19:20 | 0 |
| 10/3/2013 17:15 | 0.223703088 | 10/2/2013 19:30 | 0 |
| 10/3/2013 17:30 | 0.223703088 | 10/2/2013 19:40 | 0 |
| 10/3/2013 17:45 | 0.218039719 | 10/2/2013 19:50 | 0 |
| 10/3/2013 18:00 | 0.218039719 | 10/2/2013 20:00 | 0 |
| 10/3/2013 18:15 | 0.218039719 | 10/2/2013 20:10 | 0 |
| 10/3/2013 18:30 | 0.218039719 | 10/2/2013 20:20 | 0 |
| 10/3/2013 18:45 | 0.218039719 | 10/2/2013 20:30 | 0 |
| 10/3/2013 19:00 | 0.218039719 | 10/2/2013 20:40 | 0 |
| 10/3/2013 19:15 | 0.218039719 | 10/2/2013 20:50 | 0 |
| 10/3/2013 19:30 | 0.223703088 | 10/2/2013 21:00 | 0 |
| 10/3/2013 19:45 | 0.218039719 | 10/2/2013 21:10 | 0 |
| 10/3/2013 20:00 | 0.218039719 | 10/2/2013 21:20 | 0 |
| 10/3/2013 20:15 | 0.223703088 | 10/2/2013 21:30 | 0 |
| 10/3/2013 20:30 | 0.223703088 | 10/2/2013 21:40 | 0 |
| 10/3/2013 20:45 | 0.229366457 | 10/2/2013 21:50 | 0 |
| 10/3/2013 21:00 | 0.223703088 | 10/2/2013 22:00 | 0 |
| 10/3/2013 21:15 | 0.229366457 | 10/2/2013 22:10 | 0 |
| 10/3/2013 21:30 | 0.223703088 | 10/2/2013 22:20 | 0 |
| 10/3/2013 21:45 | 0.240693196 | 10/2/2013 22:30 | 0 |
| 10/3/2013 22:00 | 0.235029827 | 10/2/2013 22:40 | 0 |

|                 |             |                 |   |
|-----------------|-------------|-----------------|---|
| 10/3/2013 22:15 | 0.240693196 | 10/2/2013 22:50 | 0 |
| 10/3/2013 22:30 | 0.240693196 | 10/2/2013 23:00 | 0 |
| 10/3/2013 22:45 | 0.235029827 | 10/2/2013 23:10 | 0 |
| 10/3/2013 23:00 | 0.240693196 | 10/2/2013 23:20 | 0 |
| 10/3/2013 23:15 | 0.235029827 | 10/2/2013 23:30 | 0 |
| 10/3/2013 23:30 | 0.229366457 | 10/2/2013 23:40 | 0 |
| 10/3/2013 23:45 | 0.235029827 | 10/2/2013 23:50 | 0 |
| 10/4/2013 0:00  | 0.229366457 | 10/3/2013 0:00  | 0 |
| 10/4/2013 0:15  | 0.229366457 | 10/3/2013 0:10  | 0 |
| 10/4/2013 0:30  | 0.229366457 | 10/3/2013 0:20  | 0 |
| 10/4/2013 0:45  | 0.229366457 | 10/3/2013 0:30  | 0 |
| 10/4/2013 1:00  | 0.223703088 | 10/3/2013 0:40  | 0 |
| 10/4/2013 1:15  | 0.218039719 | 10/3/2013 0:50  | 0 |
| 10/4/2013 1:30  | 0.218039719 | 10/3/2013 1:00  | 0 |
| 10/4/2013 1:45  | 0.215208034 | 10/3/2013 1:10  | 0 |
| 10/4/2013 2:00  | 0.209544665 | 10/3/2013 1:20  | 0 |
| 10/4/2013 2:15  | 0.223703088 | 10/3/2013 1:30  | 0 |
| 10/4/2013 2:30  | 0.271841727 | 10/3/2013 1:40  | 0 |
| 10/4/2013 2:45  | 0.311485313 | 10/3/2013 1:50  | 0 |
| 10/4/2013 3:00  | 0.311485313 | 10/3/2013 2:00  | 0 |
| 10/4/2013 3:15  | 0.311485313 | 10/3/2013 2:10  | 0 |
| 10/4/2013 3:30  | 0.311485313 | 10/3/2013 2:20  | 0 |
| 10/4/2013 3:45  | 0.622970625 | 10/3/2013 2:30  | 0 |
| 10/4/2013 4:00  | 1.189307557 | 10/3/2013 2:40  | 0 |
| 10/4/2013 4:15  | 1.50079287  | 10/3/2013 2:50  | 0 |
| 10/4/2013 4:30  | 1.529109716 | 10/3/2013 3:00  | 0 |
| 10/4/2013 4:45  | 1.529109716 | 10/3/2013 3:10  | 0 |
| 10/4/2013 5:00  | 1.670693949 | 10/3/2013 3:20  | 0 |
| 10/4/2013 5:15  | 1.925545569 | 10/3/2013 3:30  | 0 |
| 10/4/2013 5:30  | 2.123763495 | 10/3/2013 3:40  | 0 |
| 10/4/2013 5:45  | 2.152080342 | 10/3/2013 3:50  | 0 |
| 10/4/2013 6:00  | 2.152080342 | 10/3/2013 4:00  | 0 |
| 10/4/2013 6:15  | 2.038812955 | 10/3/2013 4:10  | 0 |
| 10/4/2013 6:30  | 1.868911876 | 10/3/2013 4:20  | 0 |
| 10/4/2013 6:45  | 1.783961336 | 10/3/2013 4:30  | 0 |
| 10/4/2013 7:00  | 1.670693949 | 10/3/2013 4:40  | 0 |
| 10/4/2013 7:15  | 1.557426563 | 10/3/2013 4:50  | 0 |
| 10/4/2013 7:30  | 1.529109716 | 10/3/2013 5:00  | 0 |
| 10/4/2013 7:45  | 1.727327643 | 10/3/2013 5:10  | 0 |
| 10/4/2013 8:00  | 2.152080342 | 10/3/2013 5:20  | 0 |
| 10/4/2013 8:15  | 2.208714035 | 10/3/2013 5:30  | 0 |
| 10/4/2013 8:30  | 2.265347728 | 10/3/2013 5:50  | 0 |
| 10/4/2013 8:45  | 2.491882501 | 10/3/2013 6:00  | 0 |
| 10/4/2013 9:00  | 2.66178358  | 10/3/2013 6:10  | 0 |
| 10/4/2013 9:15  | 2.83168466  | 10/3/2013 6:20  | 0 |
| 10/4/2013 9:30  | 2.944952046 | 10/3/2013 6:30  | 0 |
| 10/4/2013 9:45  | 3.00158574  | 10/3/2013 6:40  | 0 |

|                 |             |                 |        |
|-----------------|-------------|-----------------|--------|
| 10/4/2013 10:00 | 3.086536279 | 10/3/2013 6:50  | 0      |
| 10/4/2013 10:15 | 3.171486819 | 10/3/2013 7:00  | 0      |
| 10/4/2013 10:30 | 3.086536279 | 10/3/2013 7:10  | 0.0254 |
| 10/4/2013 10:45 | 3.086536279 | 10/3/2013 7:20  | 0.1778 |
| 10/4/2013 11:00 | 2.860001507 | 10/3/2013 7:30  | 0.1778 |
| 10/4/2013 11:15 | 2.83168466  | 10/3/2013 7:40  | 0.1778 |
| 10/4/2013 11:30 | 2.690100427 | 10/3/2013 7:50  | 0.1778 |
| 10/4/2013 11:45 | 2.520199347 | 10/3/2013 8:00  | 0.1778 |
| 10/4/2013 12:00 | 2.435248808 | 10/3/2013 8:10  | 0.1778 |
| 10/4/2013 12:15 | 2.293664575 | 10/3/2013 8:20  | 0.1778 |
| 10/4/2013 12:30 | 2.180397188 | 10/3/2013 8:30  | 0.1778 |
| 10/4/2013 12:45 | 2.038812955 | 10/3/2013 8:40  | 0.1778 |
| 10/4/2013 13:00 | 1.925545569 | 10/3/2013 8:50  | 0.1778 |
| 10/4/2013 13:15 | 1.840595029 | 10/3/2013 9:00  | 0.1778 |
| 10/4/2013 13:30 | 1.727327643 | 10/3/2013 9:10  | 0.1778 |
| 10/4/2013 13:45 | 1.642377103 | 10/3/2013 9:20  | 0.1778 |
| 10/4/2013 14:00 | 1.50079287  | 10/3/2013 9:30  | 0.1778 |
| 10/4/2013 14:15 | 1.41584233  | 10/3/2013 9:40  | 0.1778 |
| 10/4/2013 14:30 | 1.302574944 | 10/3/2013 9:50  | 0.1778 |
| 10/4/2013 14:45 | 1.217624404 | 10/3/2013 10:00 | 0.1778 |
| 10/4/2013 15:00 | 1.132673864 | 10/3/2013 10:10 | 0.1778 |
| 10/4/2013 15:15 | 1.104357017 | 10/3/2013 10:20 | 0.1778 |
| 10/4/2013 15:30 | 0.962772784 | 10/3/2013 10:30 | 0.1778 |
| 10/4/2013 15:45 | 0.962772784 | 10/3/2013 10:40 | 0.1778 |
| 10/4/2013 16:00 | 0.877822245 | 10/3/2013 10:50 | 0.1778 |
| 10/4/2013 16:15 | 0.821188551 | 10/3/2013 11:00 | 0.1778 |
| 10/4/2013 16:30 | 0.821188551 | 10/3/2013 11:10 | 0.1778 |
| 10/4/2013 16:45 | 0.792871705 | 10/3/2013 11:20 | 0.1778 |
| 10/4/2013 17:00 | 0.764554858 | 10/3/2013 11:30 | 0.1778 |
| 10/4/2013 17:15 | 0.736238012 | 10/3/2013 11:40 | 0.1778 |
| 10/4/2013 17:30 | 0.707921165 | 10/3/2013 11:50 | 0.1778 |
| 10/4/2013 17:45 | 0.707921165 | 10/3/2013 12:00 | 0.1778 |
| 10/4/2013 18:00 | 0.707921165 | 10/3/2013 12:10 | 0.1778 |
| 10/4/2013 18:15 | 0.651287472 | 10/3/2013 12:20 | 0.1778 |
| 10/4/2013 18:30 | 0.622970625 | 10/3/2013 12:30 | 0.1778 |
| 10/4/2013 18:45 | 0.622970625 | 10/3/2013 12:40 | 0.1778 |
| 10/4/2013 19:00 | 0.594653779 | 10/3/2013 12:50 | 0.1778 |
| 10/4/2013 19:15 | 0.594653779 | 10/3/2013 13:00 | 0.1778 |
| 10/4/2013 19:30 | 0.566336932 | 10/3/2013 13:10 | 0.1778 |
| 10/4/2013 19:45 | 0.566336932 | 10/3/2013 13:20 | 0.1778 |
| 10/4/2013 20:00 | 0.566336932 | 10/3/2013 13:30 | 0.1778 |
| 10/4/2013 20:15 | 0.566336932 | 10/3/2013 13:40 | 0.1778 |
| 10/4/2013 20:30 | 0.538020085 | 10/3/2013 13:50 | 0.1778 |
| 10/4/2013 20:45 | 0.538020085 | 10/3/2013 14:00 | 0.1778 |
| 10/4/2013 21:00 | 0.538020085 | 10/3/2013 14:10 | 0.1778 |
| 10/4/2013 21:15 | 0.538020085 | 10/3/2013 14:20 | 0.1778 |
| 10/4/2013 21:30 | 0.509703239 | 10/3/2013 14:30 | 0.1778 |



|                 |             |                 |        |
|-----------------|-------------|-----------------|--------|
| 10/4/2013 21:45 | 0.509703239 | 10/3/2013 14:40 | 0.1778 |
| 10/4/2013 22:00 | 0.481386392 | 10/3/2013 14:50 | 0.1778 |
| 10/4/2013 22:15 | 0.481386392 | 10/3/2013 15:00 | 0.1778 |
| 10/4/2013 22:30 | 0.481386392 | 10/3/2013 15:10 | 0.1778 |
| 10/4/2013 22:45 | 0.481386392 | 10/3/2013 15:20 | 0.1778 |
| 10/4/2013 23:00 | 0.481386392 | 10/3/2013 15:30 | 0.1778 |
| 10/4/2013 23:15 | 0.453069546 | 10/3/2013 15:40 | 0.1778 |
| 10/4/2013 23:30 | 0.481386392 | 10/3/2013 15:50 | 0.1778 |
| 10/4/2013 23:45 | 0.453069546 | 10/3/2013 16:00 | 0.1778 |
| 10/5/2013 0:00  | 0.453069546 | 10/3/2013 16:10 | 0.1778 |
| 10/5/2013 0:15  | 0.453069546 | 10/3/2013 16:20 | 0.1778 |
| 10/5/2013 0:30  | 0.424752699 | 10/3/2013 16:30 | 0.1778 |
| 10/5/2013 0:45  | 0.424752699 | 10/3/2013 16:40 | 0.1778 |
| 10/5/2013 1:00  | 0.424752699 | 10/3/2013 16:50 | 0.1778 |
| 10/5/2013 1:15  | 0.424752699 | 10/3/2013 17:00 | 0.1778 |
| 10/5/2013 1:30  | 0.396435852 | 10/3/2013 17:10 | 0.1778 |
| 10/5/2013 1:45  | 0.424752699 | 10/3/2013 17:20 | 0.1778 |
| 10/5/2013 2:00  | 0.396435852 | 10/3/2013 17:30 | 0.1778 |
| 10/5/2013 2:15  | 0.396435852 | 10/3/2013 17:40 | 0.1778 |
| 10/5/2013 2:30  | 0.396435852 | 10/3/2013 17:50 | 0.1778 |
| 10/5/2013 2:45  | 0.396435852 | 10/3/2013 18:00 | 0.1778 |
| 10/5/2013 3:00  | 0.396435852 | 10/3/2013 18:10 | 0.1778 |
| 10/5/2013 3:15  | 0.396435852 | 10/3/2013 18:20 | 0.1778 |
| 10/5/2013 3:30  | 0.396435852 | 10/3/2013 18:30 | 0.1778 |
| 10/5/2013 3:45  | 0.396435852 | 10/3/2013 18:40 | 0.254  |
| 10/5/2013 4:00  | 0.396435852 | 10/3/2013 18:50 | 0.254  |
| 10/5/2013 4:15  | 0.396435852 | 10/3/2013 19:00 | 0.254  |
| 10/5/2013 4:30  | 0.396435852 | 10/3/2013 19:10 | 0.254  |
| 10/5/2013 4:45  | 0.396435852 | 10/3/2013 19:20 | 0.254  |
| 10/5/2013 5:00  | 0.396435852 | 10/3/2013 19:30 | 0.254  |
| 10/5/2013 5:15  | 0.396435852 | 10/3/2013 19:40 | 0.254  |
| 10/5/2013 5:30  | 0.368119006 | 10/3/2013 19:50 | 0.254  |
| 10/5/2013 5:45  | 0.396435852 | 10/3/2013 20:00 | 0.254  |
| 10/5/2013 6:00  | 0.368119006 | 10/3/2013 20:10 | 0.254  |
| 10/5/2013 6:15  | 0.368119006 | 10/3/2013 20:20 | 0.254  |
| 10/5/2013 6:30  | 0.368119006 | 10/3/2013 20:30 | 0.254  |
| 10/5/2013 6:45  | 0.368119006 | 10/3/2013 20:40 | 0.254  |
| 10/5/2013 7:00  | 0.368119006 | 10/3/2013 20:50 | 0.254  |
| 10/5/2013 7:15  | 0.368119006 | 10/3/2013 21:00 | 0.254  |
| 10/5/2013 7:30  | 0.368119006 | 10/3/2013 21:10 | 0.254  |
| 10/5/2013 7:45  | 0.368119006 | 10/3/2013 21:20 | 0.254  |
| 10/5/2013 8:00  | 0.368119006 | 10/3/2013 21:30 | 0.254  |
| 10/5/2013 8:15  | 0.368119006 | 10/3/2013 21:40 | 0.254  |
| 10/5/2013 8:30  | 0.368119006 | 10/3/2013 21:50 | 0.254  |
| 10/5/2013 8:45  | 0.368119006 | 10/3/2013 22:00 | 0.254  |
| 10/5/2013 9:00  | 0.368119006 | 10/3/2013 22:10 | 0.254  |
| 10/5/2013 9:15  | 0.368119006 | 10/3/2013 22:20 | 0.254  |

|                 |             |                 |        |
|-----------------|-------------|-----------------|--------|
| 10/5/2013 9:30  | 0.368119006 | 10/3/2013 22:30 | 0.254  |
| 10/5/2013 9:45  | 0.368119006 | 10/3/2013 22:40 | 0.254  |
| 10/5/2013 10:00 | 0.368119006 | 10/3/2013 22:50 | 0.254  |
| 10/5/2013 10:15 | 0.368119006 | 10/3/2013 23:00 | 0.254  |
| 10/5/2013 10:30 | 0.396435852 | 10/3/2013 23:10 | 0.254  |
| 10/5/2013 10:45 | 0.396435852 | 10/3/2013 23:20 | 0.254  |
| 10/5/2013 11:00 | 0.396435852 | 10/3/2013 23:30 | 0.254  |
| 10/5/2013 11:15 | 0.396435852 | 10/3/2013 23:40 | 0.254  |
| 10/5/2013 11:30 | 0.396435852 | 10/3/2013 23:50 | 0.254  |
| 10/5/2013 11:45 | 0.396435852 | 10/4/2013 0:00  | 0.254  |
| 10/5/2013 12:00 | 0.396435852 | 10/4/2013 0:10  | 0      |
| 10/5/2013 12:15 | 0.368119006 | 10/4/2013 0:20  | 0.0508 |
| 10/5/2013 12:30 | 0.396435852 | 10/4/2013 0:30  | 0.2032 |
| 10/5/2013 12:45 | 0.396435852 | 10/4/2013 0:40  | 0.2286 |
| 10/5/2013 13:00 | 0.396435852 | 10/4/2013 0:50  | 0.2286 |
| 10/5/2013 13:15 | 0.368119006 | 10/4/2013 1:00  | 0.2286 |
| 10/5/2013 13:30 | 0.368119006 | 10/4/2013 1:10  | 0.2286 |
| 10/5/2013 13:45 | 0.368119006 | 10/4/2013 1:20  | 0.2286 |
| 10/5/2013 14:00 | 0.368119006 | 10/4/2013 1:30  | 0.2286 |
| 10/5/2013 14:15 | 0.368119006 | 10/4/2013 1:40  | 0.2286 |
| 10/5/2013 14:30 | 0.368119006 | 10/4/2013 1:50  | 0.2286 |
| 10/5/2013 14:45 | 0.339802159 | 10/4/2013 2:00  | 0.2286 |
| 10/5/2013 15:00 | 0.339802159 | 10/4/2013 2:10  | 0.2286 |
| 10/5/2013 15:15 | 0.339802159 | 10/4/2013 2:20  | 0.2286 |
| 10/5/2013 15:30 | 0.339802159 | 10/4/2013 2:30  | 0.2286 |
| 10/5/2013 15:45 | 0.339802159 | 10/4/2013 2:40  | 0.2286 |
| 10/5/2013 16:00 | 0.339802159 | 10/4/2013 2:50  | 1.2446 |
| 10/5/2013 16:15 | 0.339802159 | 10/4/2013 3:00  | 1.8796 |
| 10/5/2013 16:30 | 0.339802159 | 10/4/2013 3:10  | 1.905  |
| 10/5/2013 16:45 | 0.339802159 | 10/4/2013 3:20  | 1.905  |
| 10/5/2013 17:00 | 0.339802159 | 10/4/2013 3:30  | 1.905  |
| 10/5/2013 17:15 | 0.339802159 | 10/4/2013 3:40  | 1.9304 |
| 10/5/2013 17:30 | 0.339802159 | 10/4/2013 3:50  | 1.9304 |
| 10/5/2013 17:45 | 0.311485313 | 10/4/2013 4:00  | 1.9304 |
| 10/5/2013 18:00 | 0.311485313 | 10/4/2013 4:10  | 1.9304 |
| 10/5/2013 18:15 | 0.311485313 | 10/4/2013 4:20  | 1.9304 |
| 10/5/2013 18:30 | 0.311485313 | 10/4/2013 4:30  | 1.9304 |
| 10/5/2013 18:45 | 0.311485313 | 10/4/2013 4:40  | 1.9304 |
| 10/5/2013 19:00 | 0.311485313 | 10/4/2013 4:50  | 1.9304 |
| 10/5/2013 19:15 | 0.311485313 | 10/4/2013 5:00  | 1.9304 |
| 10/5/2013 19:30 | 0.311485313 | 10/4/2013 5:10  | 1.9304 |
| 10/5/2013 19:45 | 0.311485313 | 10/4/2013 5:20  | 1.9304 |
| 10/5/2013 20:00 | 0.311485313 | 10/4/2013 5:30  | 1.9304 |
| 10/5/2013 20:15 | 0.311485313 | 10/4/2013 5:40  | 1.9304 |
| 10/5/2013 20:30 | 0.311485313 | 10/4/2013 5:50  | 1.9304 |
| 10/5/2013 20:45 | 0.311485313 | 10/4/2013 6:00  | 1.9304 |
| 10/5/2013 21:00 | 0.311485313 | 10/4/2013 6:10  | 1.9304 |

|                 |             |                 |        |
|-----------------|-------------|-----------------|--------|
| 10/5/2013 21:15 | 0.311485313 | 10/4/2013 6:20  | 1.9304 |
| 10/5/2013 21:30 | 0.311485313 | 10/4/2013 6:30  | 1.9304 |
| 10/5/2013 21:45 | 0.283168466 | 10/4/2013 6:40  | 1.9304 |
| 10/5/2013 22:00 | 0.283168466 | 10/4/2013 6:50  | 2.4384 |
| 10/5/2013 22:15 | 0.283168466 | 10/4/2013 7:00  | 2.6416 |
| 10/5/2013 22:30 | 0.283168466 | 10/4/2013 7:10  | 2.667  |
| 10/5/2013 22:45 | 0.311485313 | 10/4/2013 7:20  | 2.667  |
| 10/5/2013 23:00 | 0.277505097 | 10/4/2013 7:30  | 2.667  |
| 10/5/2013 23:15 | 0.283168466 | 10/4/2013 7:40  | 2.667  |
| 10/5/2013 23:30 | 0.271841727 | 10/4/2013 7:50  | 2.7178 |
| 10/5/2013 23:45 | 0.283168466 | 10/4/2013 8:00  | 2.9464 |
| 10/6/2013 0:00  | 0.271841727 | 10/4/2013 8:10  | 3.0226 |
| 10/6/2013 0:15  | 0.266178358 | 10/4/2013 8:20  | 3.048  |
| 10/6/2013 0:30  | 0.271841727 | 10/4/2013 8:30  | 3.0734 |
| 10/6/2013 0:45  | 0.260514989 | 10/4/2013 8:40  | 3.0988 |
| 10/6/2013 1:00  | 0.260514989 | 10/4/2013 8:50  | 3.1242 |
| 10/6/2013 1:15  | 0.254851619 | 10/4/2013 9:00  | 3.175  |
| 10/6/2013 1:30  | 0.260514989 | 10/4/2013 9:10  | 3.2258 |
| 10/6/2013 1:45  | 0.260514989 | 10/4/2013 9:20  | 3.2258 |
| 10/6/2013 2:00  | 0.260514989 | 10/4/2013 9:30  | 3.2258 |
| 10/6/2013 2:15  | 0.260514989 | 10/4/2013 9:40  | 3.2512 |
| 10/6/2013 2:30  | 0.254851619 | 10/4/2013 9:50  | 3.2512 |
| 10/6/2013 2:45  | 0.24918825  | 10/4/2013 10:00 | 3.2512 |
| 10/6/2013 3:00  | 0.243524881 | 10/4/2013 10:10 | 3.2512 |
| 10/6/2013 3:15  | 0.254851619 | 10/4/2013 10:20 | 3.2512 |
| 10/6/2013 3:30  | 0.243524881 | 10/4/2013 10:30 | 3.2512 |
| 10/6/2013 3:45  | 0.24918825  | 10/4/2013 10:40 | 3.2512 |
| 10/6/2013 4:00  | 0.240693196 | 10/4/2013 10:50 | 3.2512 |
| 10/6/2013 4:15  | 0.240693196 | 10/4/2013 11:00 | 3.2512 |
| 10/6/2013 4:30  | 0.243524881 | 10/4/2013 11:10 | 3.2512 |
| 10/6/2013 4:45  | 0.235029827 | 10/4/2013 11:20 | 3.2512 |
| 10/6/2013 5:00  | 0.229366457 | 10/4/2013 11:30 | 3.2512 |
| 10/6/2013 5:15  | 0.240693196 | 10/4/2013 11:40 | 3.2512 |
| 10/6/2013 5:30  | 0.243524881 | 10/4/2013 11:50 | 3.2512 |
| 10/6/2013 5:45  | 0.240693196 | 10/4/2013 12:00 | 3.2512 |
| 10/6/2013 6:00  | 0.235029827 | 10/4/2013 12:10 | 3.2512 |
| 10/6/2013 6:15  | 0.240693196 | 10/4/2013 12:20 | 3.2512 |
| 10/6/2013 6:30  | 0.235029827 | 10/4/2013 12:30 | 3.2512 |
| 10/6/2013 6:45  | 0.240693196 | 10/4/2013 12:40 | 3.2512 |
| 10/6/2013 7:00  | 0.223703088 | 10/4/2013 12:50 | 3.2512 |
| 10/6/2013 7:15  | 0.223703088 | 10/4/2013 13:00 | 3.2512 |
| 10/6/2013 7:30  | 0.229366457 | 10/4/2013 13:10 | 3.2512 |
| 10/6/2013 7:45  | 0.235029827 | 10/4/2013 13:20 | 3.2766 |
| 10/6/2013 8:00  | 0.235029827 | 10/4/2013 13:30 | 3.2766 |
| 10/6/2013 8:15  | 0.218039719 | 10/4/2013 13:40 | 3.2766 |
| 10/6/2013 8:30  | 0.229366457 | 10/4/2013 13:50 | 3.2766 |
| 10/6/2013 8:45  | 0.240693196 | 10/4/2013 14:00 | 3.2766 |

|                 |             |                 |        |
|-----------------|-------------|-----------------|--------|
| 10/6/2013 9:00  | 0.240693196 | 10/4/2013 14:10 | 3.2766 |
| 10/6/2013 9:15  | 0.243524881 | 10/4/2013 14:20 | 3.2766 |
| 10/6/2013 9:30  | 0.243524881 | 10/4/2013 14:30 | 3.2766 |
| 10/6/2013 9:45  | 0.240693196 | 10/4/2013 14:40 | 3.2766 |
| 10/6/2013 10:00 | 0.243524881 | 10/4/2013 14:50 | 3.2766 |
| 10/6/2013 10:15 | 0.24918825  | 10/4/2013 15:00 | 3.2766 |
| 10/6/2013 10:30 | 0.24918825  | 10/4/2013 15:10 | 3.2766 |
| 10/6/2013 10:45 | 0.266178358 | 10/4/2013 15:20 | 3.2766 |
| 10/6/2013 11:00 | 0.254851619 | 10/4/2013 15:30 | 3.2766 |
| 10/6/2013 11:15 | 0.266178358 | 10/4/2013 15:40 | 3.2766 |
| 10/6/2013 11:30 | 0.271841727 | 10/4/2013 15:50 | 3.2766 |
| 10/6/2013 11:45 | 0.271841727 | 10/4/2013 16:00 | 3.2766 |
| 10/6/2013 12:00 | 0.283168466 | 10/4/2013 16:10 | 3.2766 |
| 10/6/2013 12:15 | 0.271841727 | 10/4/2013 16:20 | 3.2766 |
| 10/6/2013 12:30 | 0.283168466 | 10/4/2013 16:30 | 3.2766 |
| 10/6/2013 12:45 | 0.283168466 | 10/4/2013 16:40 | 3.2766 |
| 10/6/2013 13:00 | 0.277505097 | 10/4/2013 16:50 | 3.2766 |
| 10/6/2013 13:15 | 0.283168466 | 10/4/2013 17:00 | 3.2766 |
| 10/6/2013 13:30 | 0.283168466 | 10/4/2013 17:10 | 3.2766 |
| 10/6/2013 13:45 | 0.271841727 | 10/4/2013 17:20 | 3.2766 |
| 10/6/2013 14:00 | 0.271841727 | 10/4/2013 17:30 | 3.2766 |
| 10/6/2013 14:15 | 0.260514989 | 10/4/2013 17:40 | 3.2766 |
| 10/6/2013 14:30 | 0.277505097 | 10/4/2013 17:50 | 3.2766 |
| 10/6/2013 14:45 | 0.283168466 | 10/4/2013 18:00 | 3.2766 |
| 10/6/2013 15:00 | 0.266178358 | 10/4/2013 18:10 | 3.2766 |
| 10/6/2013 15:15 | 0.277505097 | 10/4/2013 18:20 | 3.2766 |
| 10/6/2013 15:30 | 0.260514989 | 10/4/2013 18:30 | 3.2766 |
| 10/6/2013 15:45 | 0.277505097 | 10/4/2013 18:40 | 3.2766 |
| 10/6/2013 16:00 | 0.277505097 | 10/4/2013 18:50 | 3.2766 |
| 10/6/2013 16:15 | 0.271841727 | 10/4/2013 19:00 | 3.2766 |
| 10/6/2013 16:30 | 0.271841727 | 10/4/2013 19:10 | 3.2766 |
| 10/6/2013 16:45 | 0.260514989 | 10/4/2013 19:20 | 3.2766 |
| 10/6/2013 17:00 | 0.271841727 | 10/4/2013 19:30 | 3.2766 |
| 10/6/2013 17:15 | 0.254851619 | 10/4/2013 19:40 | 3.2766 |
| 10/6/2013 17:30 | 0.260514989 | 10/4/2013 19:50 | 3.2766 |
| 10/6/2013 17:45 | 0.266178358 | 10/4/2013 20:00 | 3.2766 |
| 10/6/2013 18:00 | 0.266178358 | 10/4/2013 20:10 | 3.2766 |
| 10/6/2013 18:15 | 0.271841727 | 10/4/2013 20:20 | 3.2766 |
| 10/6/2013 18:30 | 0.271841727 | 10/4/2013 20:30 | 3.2766 |
| 10/6/2013 18:45 | 0.271841727 | 10/4/2013 20:40 | 3.2766 |
| 10/6/2013 19:00 | 0.271841727 | 10/4/2013 20:50 | 3.2766 |
| 10/6/2013 19:15 | 0.277505097 | 10/4/2013 21:00 | 3.2766 |
| 10/6/2013 19:30 | 0.283168466 | 10/4/2013 21:10 | 3.2766 |
| 10/6/2013 19:45 | 0.311485313 | 10/4/2013 21:20 | 3.2766 |
| 10/6/2013 20:00 | 0.283168466 | 10/4/2013 21:30 | 3.2766 |
| 10/6/2013 20:15 | 0.311485313 | 10/4/2013 21:40 | 3.2766 |
| 10/6/2013 20:30 | 0.311485313 | 10/4/2013 21:50 | 3.2766 |

|                 |             |                 |        |
|-----------------|-------------|-----------------|--------|
| 10/6/2013 20:45 | 0.283168466 | 10/4/2013 22:00 | 3.2766 |
| 10/6/2013 21:00 | 0.283168466 | 10/4/2013 22:10 | 3.2766 |
| 10/6/2013 21:15 | 0.283168466 | 10/4/2013 22:20 | 3.2766 |
| 10/6/2013 21:30 | 0.311485313 | 10/4/2013 22:30 | 3.2766 |
| 10/6/2013 21:45 | 0.283168466 | 10/4/2013 22:40 | 3.2766 |
| 10/6/2013 22:00 | 0.311485313 | 10/4/2013 22:50 | 3.2766 |
| 10/6/2013 22:15 | 0.283168466 | 10/4/2013 23:00 | 3.2766 |
| 10/6/2013 22:30 | 0.283168466 | 10/4/2013 23:10 | 3.2766 |
| 10/6/2013 22:45 | 0.283168466 | 10/4/2013 23:20 | 3.2766 |
| 10/6/2013 23:00 | 0.311485313 | 10/4/2013 23:30 | 3.2766 |
| 10/6/2013 23:15 | 0.283168466 | 10/4/2013 23:40 | 3.2766 |
| 10/6/2013 23:30 | 0.283168466 | 10/4/2013 23:50 | 3.2766 |
| 10/6/2013 23:45 | 0.283168466 | 10/5/2013 0:00  | 3.2766 |
| 10/7/2013 0:00  | 0.311485313 | 10/5/2013 0:10  | 0      |
| 10/7/2013 0:15  | 0.271841727 | 10/5/2013 0:20  | 0      |
| 10/7/2013 0:30  | 0.283168466 | 10/5/2013 0:30  | 0      |
| 10/7/2013 0:45  | 0.277505097 | 10/5/2013 0:40  | 0      |
| 10/7/2013 1:00  | 0.266178358 | 10/5/2013 0:50  | 0      |
| 10/7/2013 1:15  | 0.271841727 | 10/5/2013 1:00  | 0      |
| 10/7/2013 1:30  | 0.277505097 | 10/5/2013 1:10  | 0      |
| 10/7/2013 1:45  | 0.260514989 | 10/5/2013 1:20  | 0      |
| 10/7/2013 2:00  | 0.24918825  | 10/5/2013 1:30  | 0      |
| 10/7/2013 2:15  | 0.260514989 | 10/5/2013 1:40  | 0      |
| 10/7/2013 2:30  | 0.254851619 | 10/5/2013 1:50  | 0      |
| 10/7/2013 2:45  | 0.240693196 | 10/5/2013 2:00  | 0      |
| 10/7/2013 3:00  | 0.243524881 | 10/5/2013 2:10  | 0      |
| 10/7/2013 3:15  | 0.235029827 | 10/5/2013 2:20  | 0      |
| 10/7/2013 3:30  | 0.235029827 | 10/5/2013 2:30  | 0      |
| 10/7/2013 3:45  | 0.229366457 | 10/5/2013 2:40  | 0      |
| 10/7/2013 4:00  | 0.235029827 | 10/5/2013 2:50  | 0      |
| 10/7/2013 4:15  | 0.229366457 | 10/5/2013 3:00  | 0      |
| 10/7/2013 4:30  | 0.218039719 | 10/5/2013 3:10  | 0      |
| 10/7/2013 4:45  | 0.223703088 | 10/5/2013 3:20  | 0      |
| 10/7/2013 5:00  | 0.223703088 | 10/5/2013 3:30  | 0      |
| 10/7/2013 5:15  | 0.218039719 | 10/5/2013 3:40  | 0      |
| 10/7/2013 5:30  | 0.229366457 | 10/5/2013 3:50  | 0      |
| 10/7/2013 5:45  | 0.223703088 | 10/5/2013 4:00  | 0      |
| 10/7/2013 6:00  | 0.223703088 | 10/5/2013 4:10  | 0      |
| 10/7/2013 6:15  | 0.218039719 | 10/5/2013 4:20  | 0      |
| 10/7/2013 6:30  | 0.223703088 | 10/5/2013 4:30  | 0      |
| 10/7/2013 6:45  | 0.235029827 | 10/5/2013 4:40  | 0      |
| 10/7/2013 7:00  | 0.229366457 | 10/5/2013 4:50  | 0      |
| 10/7/2013 7:15  | 0.240693196 | 10/5/2013 5:00  | 0      |
| 10/7/2013 7:30  | 0.223703088 | 10/5/2013 5:10  | 0      |
| 10/7/2013 7:45  | 0.235029827 | 10/5/2013 5:20  | 0      |
| 10/7/2013 8:00  | 0.243524881 | 10/5/2013 5:30  | 0      |
| 10/7/2013 8:15  | 0.235029827 | 10/5/2013 5:40  | 0      |

|                 |             |                 |   |
|-----------------|-------------|-----------------|---|
| 10/7/2013 8:30  | 0.24918825  | 10/5/2013 5:50  | 0 |
| 10/7/2013 8:45  | 0.24918825  | 10/5/2013 6:00  | 0 |
| 10/7/2013 9:00  | 0.260514989 | 10/5/2013 6:10  | 0 |
| 10/7/2013 9:15  | 0.271841727 | 10/5/2013 6:20  | 0 |
| 10/7/2013 9:30  | 0.266178358 | 10/5/2013 6:30  | 0 |
| 10/7/2013 9:45  | 0.260514989 | 10/5/2013 6:40  | 0 |
| 10/7/2013 10:00 | 0.271841727 | 10/5/2013 6:50  | 0 |
| 10/7/2013 10:15 | 0.266178358 | 10/5/2013 7:00  | 0 |
| 10/7/2013 10:30 | 0.277505097 | 10/5/2013 7:10  | 0 |
| 10/7/2013 10:45 | 0.271841727 | 10/5/2013 7:20  | 0 |
| 10/7/2013 11:00 | 0.266178358 | 10/5/2013 7:30  | 0 |
| 10/7/2013 11:15 | 0.24918825  | 10/5/2013 7:40  | 0 |
| 10/7/2013 11:30 | 0.266178358 | 10/5/2013 7:50  | 0 |
| 10/7/2013 11:45 | 0.254851619 | 10/5/2013 8:00  | 0 |
| 10/7/2013 12:00 | 0.254851619 | 10/5/2013 8:10  | 0 |
| 10/7/2013 12:15 | 0.24918825  | 10/5/2013 8:20  | 0 |
| 10/7/2013 12:30 | 0.243524881 | 10/5/2013 8:30  | 0 |
| 10/7/2013 12:45 | 0.254851619 | 10/5/2013 8:40  | 0 |
| 10/7/2013 13:00 | 0.24918825  | 10/5/2013 8:50  | 0 |
| 10/7/2013 13:15 | 0.260514989 | 10/5/2013 9:00  | 0 |
| 10/7/2013 13:30 | 0.260514989 | 10/5/2013 9:10  | 0 |
| 10/7/2013 13:45 | 0.243524881 | 10/5/2013 9:20  | 0 |
| 10/7/2013 14:00 | 0.24918825  | 10/5/2013 9:30  | 0 |
| 10/7/2013 14:15 | 0.243524881 | 10/5/2013 9:40  | 0 |
| 10/7/2013 14:30 | 0.254851619 | 10/5/2013 9:50  | 0 |
| 10/7/2013 14:45 | 0.229366457 | 10/5/2013 10:00 | 0 |
| 10/7/2013 15:00 | 0.24918825  | 10/5/2013 10:10 | 0 |
| 10/7/2013 15:15 | 0.229366457 | 10/5/2013 10:20 | 0 |
| 10/7/2013 15:30 | 0.243524881 | 10/5/2013 10:30 | 0 |
| 10/7/2013 15:45 | 0.243524881 | 10/5/2013 10:40 | 0 |
| 10/7/2013 16:00 | 0.24918825  | 10/5/2013 10:50 | 0 |
| 10/7/2013 16:15 | 0.229366457 | 10/5/2013 11:00 | 0 |
| 10/7/2013 16:30 | 0.235029827 | 10/5/2013 11:10 | 0 |
| 10/7/2013 16:45 | 0.240693196 | 10/5/2013 11:20 | 0 |
| 10/7/2013 17:00 | 0.240693196 | 10/5/2013 11:30 | 0 |
| 10/7/2013 17:15 | 0.240693196 | 10/5/2013 11:40 | 0 |
| 10/7/2013 17:30 | 0.235029827 | 10/5/2013 11:50 | 0 |
| 10/7/2013 17:45 | 0.235029827 | 10/5/2013 12:00 | 0 |
| 10/7/2013 18:00 | 0.235029827 | 10/5/2013 12:10 | 0 |
| 10/7/2013 18:15 | 0.240693196 | 10/5/2013 12:20 | 0 |
| 10/7/2013 18:30 | 0.229366457 | 10/5/2013 12:30 | 0 |
| 10/7/2013 18:45 | 0.235029827 | 10/5/2013 12:40 | 0 |
| 10/7/2013 19:00 | 0.235029827 | 10/5/2013 12:50 | 0 |
| 10/7/2013 19:15 | 0.235029827 | 10/5/2013 13:00 | 0 |
| 10/7/2013 19:30 | 0.240693196 | 10/5/2013 13:10 | 0 |
| 10/7/2013 19:45 | 0.240693196 | 10/5/2013 13:20 | 0 |
| 10/7/2013 20:00 | 0.243524881 | 10/5/2013 13:30 | 0 |

|                 |             |                 |   |
|-----------------|-------------|-----------------|---|
| 10/7/2013 20:15 | 0.243524881 | 10/5/2013 13:40 | 0 |
| 10/7/2013 20:30 | 0.24918825  | 10/5/2013 13:50 | 0 |
| 10/7/2013 20:45 | 0.24918825  | 10/5/2013 14:00 | 0 |
| 10/7/2013 21:00 | 0.254851619 | 10/5/2013 14:10 | 0 |
| 10/7/2013 21:15 | 0.235029827 | 10/5/2013 14:20 | 0 |
| 10/7/2013 21:30 | 0.24918825  | 10/5/2013 14:30 | 0 |
| 10/7/2013 21:45 | 0.24918825  | 10/5/2013 14:40 | 0 |
| 10/7/2013 22:00 | 0.24918825  | 10/5/2013 14:50 | 0 |
| 10/7/2013 22:15 | 0.260514989 | 10/5/2013 15:00 | 0 |
| 10/7/2013 22:30 | 0.254851619 | 10/5/2013 15:10 | 0 |
| 10/7/2013 22:45 | 0.260514989 | 10/5/2013 15:20 | 0 |
| 10/7/2013 23:00 | 0.243524881 | 10/5/2013 15:30 | 0 |
| 10/7/2013 23:15 | 0.24918825  | 10/5/2013 15:40 | 0 |
| 10/7/2013 23:30 | 0.243524881 | 10/5/2013 15:50 | 0 |
| 10/7/2013 23:45 | 0.24918825  | 10/5/2013 16:00 | 0 |
| 10/8/2013 0:00  | 0.240693196 | 10/5/2013 16:10 | 0 |
| 10/8/2013 0:15  | 0.229366457 | 10/5/2013 16:20 | 0 |
| 10/8/2013 0:30  | 0.243524881 | 10/5/2013 16:30 | 0 |
| 10/8/2013 0:45  | 0.215208034 | 10/5/2013 16:40 | 0 |
| 10/8/2013 1:00  | 0.240693196 | 10/5/2013 16:50 | 0 |
| 10/8/2013 1:15  | 0.215208034 | 10/5/2013 17:00 | 0 |
| 10/8/2013 1:30  | 0.209544665 | 10/5/2013 17:10 | 0 |
| 10/8/2013 1:45  | 0.215208034 | 10/5/2013 17:20 | 0 |
| 10/8/2013 2:00  | 0.215208034 | 10/5/2013 17:30 | 0 |
| 10/8/2013 2:15  | 0.203881296 | 10/5/2013 17:40 | 0 |
| 10/8/2013 2:30  | 0.201049611 | 10/5/2013 17:50 | 0 |
| 10/8/2013 2:45  | 0.209544665 | 10/5/2013 18:00 | 0 |
| 10/8/2013 3:00  | 0.201049611 | 10/5/2013 18:10 | 0 |
| 10/8/2013 3:15  | 0.203881296 | 10/5/2013 18:20 | 0 |
| 10/8/2013 3:30  | 0.203881296 | 10/5/2013 18:30 | 0 |
| 10/8/2013 3:45  | 0.203881296 | 10/5/2013 18:40 | 0 |
| 10/8/2013 4:00  | 0.186891188 | 10/5/2013 18:50 | 0 |
| 10/8/2013 4:15  | 0.186891188 | 10/5/2013 19:00 | 0 |
| 10/8/2013 4:30  | 0.201049611 | 10/5/2013 19:10 | 0 |
| 10/8/2013 4:45  | 0.195386242 | 10/5/2013 19:20 | 0 |
| 10/8/2013 5:00  | 0.195386242 | 10/5/2013 19:30 | 0 |
| 10/8/2013 5:15  | 0.172732764 | 10/5/2013 19:40 | 0 |
| 10/8/2013 5:30  | 0.189722872 | 10/5/2013 19:50 | 0 |
| 10/8/2013 5:45  | 0.195386242 | 10/5/2013 20:00 | 0 |
| 10/8/2013 6:00  | 0.186891188 | 10/5/2013 20:10 | 0 |
| 10/8/2013 6:15  | 0.189722872 | 10/5/2013 20:20 | 0 |
| 10/8/2013 6:30  | 0.189722872 | 10/5/2013 20:30 | 0 |
| 10/8/2013 6:45  | 0.195386242 | 10/5/2013 20:40 | 0 |
| 10/8/2013 7:00  | 0.195386242 | 10/5/2013 20:50 | 0 |
| 10/8/2013 7:15  | 0.201049611 | 10/5/2013 21:00 | 0 |
| 10/8/2013 7:30  | 0.195386242 | 10/5/2013 21:10 | 0 |
| 10/8/2013 7:45  | 0.209544665 | 10/5/2013 21:20 | 0 |

|                 |             |                 |   |
|-----------------|-------------|-----------------|---|
| 10/8/2013 8:00  | 0.203881296 | 10/5/2013 21:30 | 0 |
| 10/8/2013 8:15  | 0.201049611 | 10/5/2013 21:40 | 0 |
| 10/8/2013 8:30  | 0.229366457 | 10/5/2013 21:50 | 0 |
| 10/8/2013 8:45  | 0.223703088 | 10/5/2013 22:00 | 0 |
| 10/8/2013 9:00  | 0.240693196 | 10/5/2013 22:10 | 0 |
| 10/8/2013 9:15  | 0.24918825  | 10/5/2013 22:20 | 0 |
| 10/8/2013 9:30  | 0.243524881 | 10/5/2013 22:30 | 0 |
| 10/8/2013 9:45  | 0.24918825  | 10/5/2013 22:40 | 0 |
| 10/8/2013 10:00 | 0.243524881 | 10/5/2013 22:50 | 0 |
| 10/8/2013 10:15 | 0.24918825  | 10/5/2013 23:00 | 0 |
| 10/8/2013 10:30 | 0.24918825  | 10/5/2013 23:10 | 0 |
| 10/8/2013 10:45 | 0.24918825  | 10/5/2013 23:20 | 0 |
| 10/8/2013 11:00 | 0.254851619 | 10/5/2013 23:30 | 0 |
| 10/8/2013 11:15 | 0.240693196 | 10/5/2013 23:40 | 0 |
| 10/8/2013 11:30 | 0.240693196 | 10/5/2013 23:50 | 0 |
| 10/8/2013 11:45 | 0.240693196 | 10/6/2013 0:00  | 0 |
| 10/8/2013 12:00 | 0.240693196 | 10/6/2013 0:10  | 0 |
| 10/8/2013 12:15 | 0.235029827 | 10/6/2013 0:20  | 0 |
| 10/8/2013 12:30 | 0.243524881 | 10/6/2013 0:30  | 0 |
| 10/8/2013 12:45 | 0.235029827 | 10/6/2013 0:40  | 0 |
| 10/8/2013 13:00 | 0.229366457 | 10/6/2013 0:50  | 0 |
| 10/8/2013 13:15 | 0.235029827 | 10/6/2013 1:00  | 0 |
| 10/8/2013 13:30 | 0.218039719 | 10/6/2013 1:10  | 0 |
| 10/8/2013 13:45 | 0.223703088 | 10/6/2013 1:20  | 0 |
| 10/8/2013 14:00 | 0.223703088 | 10/6/2013 1:30  | 0 |
| 10/8/2013 14:15 | 0.223703088 | 10/6/2013 1:40  | 0 |
| 10/8/2013 14:30 | 0.223703088 | 10/6/2013 1:50  | 0 |
| 10/8/2013 14:45 | 0.223703088 | 10/6/2013 2:00  | 0 |
| 10/8/2013 15:00 | 0.229366457 | 10/6/2013 2:10  | 0 |
| 10/8/2013 15:15 | 0.218039719 | 10/6/2013 2:20  | 0 |
| 10/8/2013 15:30 | 0.218039719 | 10/6/2013 2:30  | 0 |
| 10/8/2013 15:45 | 0.223703088 | 10/6/2013 2:40  | 0 |
| 10/8/2013 16:00 | 0.215208034 | 10/6/2013 2:50  | 0 |
| 10/8/2013 16:15 | 0.209544665 | 10/6/2013 3:00  | 0 |
| 10/8/2013 16:30 | 0.223703088 | 10/6/2013 3:10  | 0 |
| 10/8/2013 16:45 | 0.223703088 | 10/6/2013 3:20  | 0 |
| 10/8/2013 17:00 | 0.218039719 | 10/6/2013 3:30  | 0 |
| 10/8/2013 17:15 | 0.209544665 | 10/6/2013 3:40  | 0 |
| 10/8/2013 17:30 | 0.215208034 | 10/6/2013 3:50  | 0 |
| 10/8/2013 17:45 | 0.209544665 | 10/6/2013 4:00  | 0 |
| 10/8/2013 18:00 | 0.218039719 | 10/6/2013 4:10  | 0 |
| 10/8/2013 18:15 | 0.209544665 | 10/6/2013 4:20  | 0 |
| 10/8/2013 18:30 | 0.201049611 | 10/6/2013 4:30  | 0 |
| 10/8/2013 18:45 | 0.209544665 | 10/6/2013 4:40  | 0 |
| 10/8/2013 19:00 | 0.203881296 | 10/6/2013 4:50  | 0 |
| 10/8/2013 19:15 | 0.218039719 | 10/6/2013 5:00  | 0 |
| 10/8/2013 19:30 | 0.215208034 | 10/6/2013 5:10  | 0 |



|                 |             |                 |   |
|-----------------|-------------|-----------------|---|
| 10/8/2013 19:45 | 0.223703088 | 10/6/2013 5:20  | 0 |
| 10/8/2013 20:00 | 0.218039719 | 10/6/2013 5:30  | 0 |
| 10/8/2013 20:15 | 0.229366457 | 10/6/2013 5:40  | 0 |
| 10/8/2013 20:30 | 0.218039719 | 10/6/2013 5:50  | 0 |
| 10/8/2013 20:45 | 0.229366457 | 10/6/2013 6:00  | 0 |
| 10/8/2013 21:00 | 0.235029827 | 10/6/2013 6:10  | 0 |
| 10/8/2013 21:15 | 0.240693196 | 10/6/2013 6:20  | 0 |
| 10/8/2013 21:30 | 0.229366457 | 10/6/2013 6:30  | 0 |
| 10/8/2013 21:45 | 0.243524881 | 10/6/2013 6:40  | 0 |
| 10/8/2013 22:00 | 0.229366457 | 10/6/2013 6:50  | 0 |
| 10/8/2013 22:15 | 0.235029827 | 10/6/2013 7:00  | 0 |
| 10/8/2013 22:30 | 0.235029827 | 10/6/2013 7:10  | 0 |
| 10/8/2013 22:45 | 0.243524881 | 10/6/2013 7:20  | 0 |
| 10/8/2013 23:00 | 0.243524881 | 10/6/2013 7:30  | 0 |
| 10/8/2013 23:15 | 0.223703088 | 10/6/2013 7:40  | 0 |
| 10/8/2013 23:30 | 0.229366457 | 10/6/2013 7:50  | 0 |
| 10/8/2013 23:45 | 0.240693196 | 10/6/2013 8:00  | 0 |
| 10/9/2013 0:00  | 0.235029827 | 10/6/2013 8:10  | 0 |
| 10/9/2013 0:15  | 0.235029827 | 10/6/2013 8:20  | 0 |
| 10/9/2013 0:30  | 0.218039719 | 10/6/2013 8:30  | 0 |
| 10/9/2013 0:45  | 0.215208034 | 10/6/2013 8:40  | 0 |
| 10/9/2013 1:00  | 0.201049611 | 10/6/2013 8:50  | 0 |
| 10/9/2013 1:15  | 0.218039719 | 10/6/2013 9:00  | 0 |
| 10/9/2013 1:30  | 0.218039719 | 10/6/2013 9:10  | 0 |
| 10/9/2013 1:45  | 0.203881296 | 10/6/2013 9:20  | 0 |
| 10/9/2013 2:00  | 0.209544665 | 10/6/2013 9:30  | 0 |
| 10/9/2013 2:15  | 0.201049611 | 10/6/2013 9:40  | 0 |
| 10/9/2013 2:30  | 0.201049611 | 10/6/2013 9:50  | 0 |
| 10/9/2013 2:45  | 0.201049611 | 10/6/2013 10:00 | 0 |
| 10/9/2013 3:00  | 0.186891188 | 10/6/2013 10:10 | 0 |
| 10/9/2013 3:15  | 0.178396134 | 10/6/2013 10:20 | 0 |
| 10/9/2013 3:30  | 0.189722872 | 10/6/2013 10:30 | 0 |
| 10/9/2013 3:45  | 0.186891188 | 10/6/2013 10:40 | 0 |
| 10/9/2013 4:00  | 0.189722872 | 10/6/2013 10:50 | 0 |
| 10/9/2013 4:15  | 0.181227818 | 10/6/2013 11:00 | 0 |
| 10/9/2013 4:30  | 0.16990108  | 10/6/2013 11:10 | 0 |
| 10/9/2013 4:45  | 0.178396134 | 10/6/2013 11:20 | 0 |
| 10/9/2013 5:00  | 0.181227818 | 10/6/2013 11:30 | 0 |
| 10/9/2013 5:15  | 0.178396134 | 10/6/2013 11:40 | 0 |
| 10/9/2013 5:30  | 0.181227818 | 10/6/2013 11:50 | 0 |
| 10/9/2013 5:45  | 0.186891188 | 10/6/2013 12:00 | 0 |
| 10/9/2013 6:00  | 0.178396134 | 10/6/2013 12:10 | 0 |
| 10/9/2013 6:15  | 0.181227818 | 10/6/2013 12:20 | 0 |
| 10/9/2013 6:30  | 0.16990108  | 10/6/2013 12:30 | 0 |
| 10/9/2013 6:45  | 0.181227818 | 10/6/2013 12:40 | 0 |
| 10/9/2013 7:00  | 0.172732764 | 10/6/2013 12:50 | 0 |
| 10/9/2013 7:15  | 0.195386242 | 10/6/2013 13:00 | 0 |

|                 |             |                 |        |
|-----------------|-------------|-----------------|--------|
| 10/9/2013 7:30  | 0.189722872 | 10/6/2013 13:10 | 0      |
| 10/9/2013 7:45  | 0.201049611 | 10/6/2013 13:20 | 0      |
| 10/9/2013 8:00  | 0.195386242 | 10/6/2013 13:30 | 0      |
| 10/9/2013 8:15  | 0.195386242 | 10/6/2013 13:40 | 0      |
| 10/9/2013 8:30  | 0.189722872 | 10/6/2013 13:50 | 0      |
| 10/9/2013 8:45  | 0.235029827 | 10/6/2013 14:00 | 0      |
| 10/9/2013 9:00  | 0.229366457 | 10/6/2013 14:10 | 0      |
| 10/9/2013 9:15  | 0.218039719 | 10/6/2013 14:20 | 0.0254 |
| 10/9/2013 9:30  | 0.223703088 | 10/6/2013 14:30 | 0.0254 |
| 10/9/2013 9:45  | 0.229366457 | 10/6/2013 14:40 | 0.0254 |
| 10/9/2013 10:00 | 0.229366457 | 10/6/2013 14:50 | 0.0508 |
| 10/9/2013 10:15 | 0.243524881 | 10/6/2013 15:00 | 0.0508 |
| 10/9/2013 10:30 | 0.223703088 | 10/6/2013 15:10 | 0.0762 |
| 10/9/2013 10:45 | 0.223703088 | 10/6/2013 15:20 | 0.0762 |
| 10/9/2013 11:00 | 0.235029827 | 10/6/2013 15:30 | 0.1016 |
| 10/9/2013 11:15 | 0.240693196 | 10/6/2013 15:40 | 0.127  |
| 10/9/2013 11:30 | 0.235029827 | 10/6/2013 15:50 | 0.1524 |
| 10/9/2013 11:45 | 0.235029827 | 10/6/2013 16:00 | 0.1524 |
| 10/9/2013 12:00 | 0.235029827 | 10/6/2013 16:10 | 0.1778 |
| 10/9/2013 12:15 | 0.223703088 | 10/6/2013 16:20 | 0.2032 |
| 10/9/2013 12:30 | 0.209544665 | 10/6/2013 16:30 | 0.2032 |
| 10/9/2013 12:45 | 0.209544665 | 10/6/2013 16:40 | 0.2286 |
| 10/9/2013 13:00 | 0.215208034 | 10/6/2013 16:50 | 0.2286 |
| 10/9/2013 13:15 | 0.209544665 | 10/6/2013 17:00 | 0.2286 |
| 10/9/2013 13:30 | 0.223703088 | 10/6/2013 17:10 | 0.254  |
| 10/9/2013 13:45 | 0.223703088 | 10/6/2013 17:20 | 0.254  |
| 10/9/2013 14:00 | 0.223703088 | 10/6/2013 17:30 | 0.254  |
| 10/9/2013 14:15 | 0.209544665 | 10/6/2013 17:40 | 0.2794 |
| 10/9/2013 14:30 | 0.209544665 | 10/6/2013 17:50 | 0.2794 |
| 10/9/2013 14:45 | 0.209544665 | 10/6/2013 18:00 | 0.3048 |
| 10/9/2013 15:00 | 0.209544665 | 10/6/2013 18:10 | 0.3048 |
| 10/9/2013 15:15 | 0.209544665 | 10/6/2013 18:20 | 0.3302 |
| 10/9/2013 15:30 | 0.209544665 | 10/6/2013 18:30 | 0.3302 |
| 10/9/2013 15:45 | 0.201049611 | 10/6/2013 18:40 | 0.3556 |
| 10/9/2013 16:00 | 0.209544665 | 10/6/2013 18:50 | 0.3556 |
| 10/9/2013 16:15 | 0.203881296 | 10/6/2013 19:00 | 0.3556 |
| 10/9/2013 16:30 | 0.209544665 | 10/6/2013 19:10 | 0.3556 |
| 10/9/2013 16:45 | 0.195386242 | 10/6/2013 19:20 | 0.381  |
| 10/9/2013 17:00 | 0.209544665 | 10/6/2013 19:30 | 0.381  |
| 10/9/2013 17:15 | 0.203881296 | 10/6/2013 19:40 | 0.381  |
| 10/9/2013 17:30 | 0.215208034 | 10/6/2013 19:50 | 0.381  |
| 10/9/2013 17:45 | 0.209544665 | 10/6/2013 20:00 | 0.381  |
| 10/9/2013 18:00 | 0.203881296 | 10/6/2013 20:10 | 0.381  |
| 10/9/2013 18:15 | 0.209544665 | 10/6/2013 20:20 | 0.381  |
| 10/9/2013 18:30 | 0.195386242 | 10/6/2013 20:30 | 0.381  |
| 10/9/2013 18:45 | 0.203881296 | 10/6/2013 20:40 | 0.381  |
| 10/9/2013 19:00 | 0.203881296 | 10/6/2013 20:50 | 0.381  |

|                 |             |                 |       |
|-----------------|-------------|-----------------|-------|
| 10/9/2013 19:15 | 0.218039719 | 10/6/2013 21:00 | 0.381 |
| 10/9/2013 19:30 | 0.218039719 | 10/6/2013 21:10 | 0.381 |
| 10/9/2013 19:45 | 0.201049611 | 10/6/2013 21:20 | 0.381 |
| 10/9/2013 20:00 | 0.218039719 | 10/6/2013 21:30 | 0.381 |
| 10/9/2013 20:15 | 0.209544665 | 10/6/2013 21:40 | 0.381 |
| 10/9/2013 20:30 | 0.223703088 | 10/6/2013 21:50 | 0.381 |
| 10/9/2013 20:45 | 0.229366457 | 10/6/2013 22:00 | 0.381 |
| 10/9/2013 21:00 | 0.209544665 | 10/6/2013 22:10 | 0.381 |
| 10/9/2013 21:15 | 0.229366457 | 10/6/2013 22:20 | 0.381 |
| 10/9/2013 21:30 | 0.223703088 | 10/6/2013 22:30 | 0.381 |
| 10/9/2013 21:45 | 0.223703088 | 10/6/2013 22:40 | 0.381 |
| 10/9/2013 22:00 | 0.229366457 | 10/6/2013 22:50 | 0.381 |
| 10/9/2013 22:15 | 0.229366457 | 10/6/2013 23:00 | 0.381 |
| 10/9/2013 22:30 | 0.235029827 | 10/6/2013 23:10 | 0.381 |
| 10/9/2013 22:45 | 0.218039719 | 10/6/2013 23:20 | 0.381 |
| 10/9/2013 23:00 | 0.229366457 | 10/6/2013 23:30 | 0.381 |
| 10/9/2013 23:15 | 0.229366457 | 10/6/2013 23:40 | 0.381 |
| 10/9/2013 23:30 | 0.235029827 | 10/6/2013 23:50 | 0.381 |
| 10/9/2013 23:45 | 0.215208034 | 10/7/2013 0:00  | 0.381 |
| 10/10/2013 0:00 | 0.218039719 | 10/7/2013 0:10  | 0     |
| 10/10/2013 0:15 | 0.218039719 | 10/7/2013 0:20  | 0     |
| 10/10/2013 0:30 | 0.215208034 | 10/7/2013 0:30  | 0     |
| 10/10/2013 0:45 | 0.209544665 | 10/7/2013 0:40  | 0     |
| 10/10/2013 1:00 | 0.195386242 | 10/7/2013 0:50  | 0     |
| 10/10/2013 1:15 | 0.209544665 | 10/7/2013 1:00  | 0     |
| 10/10/2013 1:30 | 0.201049611 | 10/7/2013 1:10  | 0     |
| 10/10/2013 1:45 | 0.201049611 | 10/7/2013 1:20  | 0     |
| 10/10/2013 2:00 | 0.189722872 | 10/7/2013 1:30  | 0     |
| 10/10/2013 2:15 | 0.181227818 | 10/7/2013 1:40  | 0     |
| 10/10/2013 2:30 | 0.189722872 | 10/7/2013 1:50  | 0     |
| 10/10/2013 2:45 | 0.186891188 | 10/7/2013 2:00  | 0     |
| 10/10/2013 3:00 | 0.189722872 | 10/7/2013 2:10  | 0     |
| 10/10/2013 3:15 | 0.181227818 | 10/7/2013 2:20  | 0     |
| 10/10/2013 3:30 | 0.16990108  | 10/7/2013 2:30  | 0     |
| 10/10/2013 3:45 | 0.178396134 | 10/7/2013 2:40  | 0     |
| 10/10/2013 4:00 | 0.16990108  | 10/7/2013 2:50  | 0     |
| 10/10/2013 4:15 | 0.161406026 | 10/7/2013 3:00  | 0     |
| 10/10/2013 4:30 | 0.178396134 | 10/7/2013 3:10  | 0     |
| 10/10/2013 4:45 | 0.16990108  | 10/7/2013 3:20  | 0     |
| 10/10/2013 5:00 | 0.178396134 | 10/7/2013 3:30  | 0     |
| 10/10/2013 5:15 | 0.178396134 | 10/7/2013 3:40  | 0     |
| 10/10/2013 5:30 | 0.172732764 | 10/7/2013 3:50  | 0     |
| 10/10/2013 5:45 | 0.172732764 | 10/7/2013 4:00  | 0     |
| 10/10/2013 6:00 | 0.16990108  | 10/7/2013 4:10  | 0     |
| 10/10/2013 6:15 | 0.161406026 | 10/7/2013 4:20  | 0     |
| 10/10/2013 6:30 | 0.16423771  | 10/7/2013 4:30  | 0     |
| 10/10/2013 6:45 | 0.16990108  | 10/7/2013 4:40  | 0     |

|                  |             |                 |   |
|------------------|-------------|-----------------|---|
| 10/10/2013 7:00  | 0.16990108  | 10/7/2013 4:50  | 0 |
| 10/10/2013 7:15  | 0.186891188 | 10/7/2013 5:00  | 0 |
| 10/10/2013 7:30  | 0.186891188 | 10/7/2013 5:10  | 0 |
| 10/10/2013 7:45  | 0.181227818 | 10/7/2013 5:20  | 0 |
| 10/10/2013 8:00  | 0.195386242 | 10/7/2013 5:30  | 0 |
| 10/10/2013 8:15  | 0.189722872 | 10/7/2013 5:40  | 0 |
| 10/10/2013 8:30  | 0.203881296 | 10/7/2013 5:50  | 0 |
| 10/10/2013 8:45  | 0.203881296 | 10/7/2013 6:00  | 0 |
| 10/10/2013 9:00  | 0.218039719 | 10/7/2013 6:10  | 0 |
| 10/10/2013 9:15  | 0.235029827 | 10/7/2013 6:20  | 0 |
| 10/10/2013 9:30  | 0.218039719 | 10/7/2013 6:30  | 0 |
| 10/10/2013 9:45  | 0.223703088 | 10/7/2013 6:40  | 0 |
| 10/10/2013 10:00 | 0.229366457 | 10/7/2013 6:50  | 0 |
| 10/10/2013 10:15 | 0.223703088 | 10/7/2013 7:00  | 0 |
| 10/10/2013 10:30 | 0.235029827 | 10/7/2013 7:10  | 0 |
| 10/10/2013 10:45 | 0.223703088 | 10/7/2013 7:20  | 0 |
| 10/10/2013 11:00 | 0.229366457 | 10/7/2013 7:30  | 0 |
| 10/10/2013 11:15 | 0.218039719 | 10/7/2013 7:40  | 0 |
| 10/10/2013 11:30 | 0.218039719 | 10/7/2013 7:50  | 0 |
| 10/10/2013 11:45 | 0.218039719 | 10/7/2013 8:00  | 0 |
| 10/10/2013 12:00 | 0.218039719 | 10/7/2013 8:10  | 0 |
| 10/10/2013 12:15 | 0.209544665 | 10/7/2013 8:20  | 0 |
| 10/10/2013 12:30 | 0.209544665 | 10/7/2013 8:30  | 0 |
| 10/10/2013 12:45 | 0.201049611 | 10/7/2013 8:40  | 0 |
| 10/10/2013 13:00 | 0.203881296 | 10/7/2013 8:50  | 0 |
| 10/10/2013 13:15 | 0.203881296 | 10/7/2013 9:00  | 0 |
| 10/10/2013 13:30 | 0.209544665 | 10/7/2013 9:10  | 0 |
| 10/10/2013 13:45 | 0.215208034 | 10/7/2013 9:20  | 0 |
| 10/10/2013 14:00 | 0.203881296 | 10/7/2013 9:30  | 0 |
| 10/10/2013 14:15 | 0.203881296 | 10/7/2013 9:40  | 0 |
| 10/10/2013 14:30 | 0.209544665 | 10/7/2013 9:50  | 0 |
| 10/10/2013 14:45 | 0.203881296 | 10/7/2013 10:00 | 0 |
| 10/10/2013 15:00 | 0.209544665 | 10/7/2013 10:10 | 0 |
| 10/10/2013 15:15 | 0.209544665 | 10/7/2013 10:20 | 0 |
| 10/10/2013 15:30 | 0.201049611 | 10/7/2013 10:30 | 0 |
| 10/10/2013 15:45 | 0.203881296 | 10/7/2013 10:40 | 0 |
| 10/10/2013 16:00 | 0.209544665 | 10/7/2013 10:50 | 0 |
| 10/10/2013 16:15 | 0.209544665 | 10/7/2013 11:00 | 0 |
| 10/10/2013 16:30 | 0.195386242 | 10/7/2013 11:10 | 0 |
| 10/10/2013 16:45 | 0.201049611 | 10/7/2013 11:20 | 0 |
| 10/10/2013 17:00 | 0.195386242 | 10/7/2013 11:30 | 0 |
| 10/10/2013 17:15 | 0.186891188 | 10/7/2013 11:40 | 0 |
| 10/10/2013 17:30 | 0.195386242 | 10/7/2013 11:50 | 0 |
| 10/10/2013 17:45 | 0.195386242 | 10/7/2013 12:00 | 0 |
| 10/10/2013 18:00 | 0.201049611 | 10/7/2013 12:10 | 0 |
| 10/10/2013 18:15 | 0.209544665 | 10/7/2013 12:20 | 0 |
| 10/10/2013 18:30 | 0.203881296 | 10/7/2013 12:30 | 0 |

|                  |             |                 |   |
|------------------|-------------|-----------------|---|
| 10/10/2013 18:45 | 0.209544665 | 10/7/2013 12:40 | 0 |
| 10/10/2013 19:00 | 0.209544665 | 10/7/2013 12:50 | 0 |
| 10/10/2013 19:15 | 0.203881296 | 10/7/2013 13:00 | 0 |
| 10/10/2013 19:30 | 0.201049611 | 10/7/2013 13:10 | 0 |
| 10/10/2013 19:45 | 0.209544665 | 10/7/2013 13:20 | 0 |
| 10/10/2013 20:00 | 0.203881296 | 10/7/2013 13:30 | 0 |
| 10/10/2013 20:15 | 0.201049611 | 10/7/2013 13:40 | 0 |
| 10/10/2013 20:30 | 0.215208034 | 10/7/2013 13:50 | 0 |
| 10/10/2013 20:45 | 0.215208034 | 10/7/2013 14:00 | 0 |
| 10/10/2013 21:00 | 0.215208034 | 10/7/2013 14:10 | 0 |
| 10/10/2013 21:15 | 0.215208034 | 10/7/2013 14:20 | 0 |
| 10/10/2013 21:30 | 0.218039719 | 10/7/2013 14:30 | 0 |
| 10/10/2013 21:45 | 0.223703088 | 10/7/2013 14:40 | 0 |
| 10/10/2013 22:00 | 0.218039719 | 10/7/2013 14:50 | 0 |
| 10/10/2013 22:15 | 0.223703088 | 10/7/2013 15:00 | 0 |
| 10/10/2013 22:30 | 0.218039719 | 10/7/2013 15:10 | 0 |
| 10/10/2013 22:45 | 0.223703088 | 10/7/2013 15:20 | 0 |
| 10/10/2013 23:00 | 0.223703088 | 10/7/2013 15:30 | 0 |
| 10/10/2013 23:15 | 0.218039719 | 10/7/2013 15:40 | 0 |
| 10/10/2013 23:30 | 0.218039719 | 10/7/2013 15:50 | 0 |
| 10/10/2013 23:45 | 0.218039719 | 10/7/2013 16:00 | 0 |
| 10/11/2013 0:00  | 0.215208034 | 10/7/2013 16:10 | 0 |
| 10/11/2013 0:15  | 0.209544665 | 10/7/2013 16:20 | 0 |
| 10/11/2013 0:30  | 0.209544665 | 10/7/2013 16:30 | 0 |
| 10/11/2013 0:45  | 0.209544665 | 10/7/2013 16:40 | 0 |
| 10/11/2013 1:00  | 0.203881296 | 10/7/2013 16:50 | 0 |
| 10/11/2013 1:15  | 0.203881296 | 10/7/2013 17:00 | 0 |
| 10/11/2013 1:30  | 0.201049611 | 10/7/2013 17:10 | 0 |
| 10/11/2013 1:45  | 0.195386242 | 10/7/2013 17:20 | 0 |
| 10/11/2013 2:00  | 0.189722872 | 10/7/2013 17:30 | 0 |
| 10/11/2013 2:15  | 0.181227818 | 10/7/2013 17:40 | 0 |
| 10/11/2013 2:30  | 0.186891188 | 10/7/2013 17:50 | 0 |
| 10/11/2013 2:45  | 0.181227818 | 10/7/2013 18:00 | 0 |
| 10/11/2013 3:00  | 0.181227818 | 10/7/2013 18:10 | 0 |
| 10/11/2013 3:15  | 0.172732764 | 10/7/2013 18:20 | 0 |
| 10/11/2013 3:30  | 0.16990108  | 10/7/2013 18:30 | 0 |
| 10/11/2013 3:45  | 0.178396134 | 10/7/2013 18:40 | 0 |
| 10/11/2013 4:00  | 0.172732764 | 10/7/2013 18:50 | 0 |
| 10/11/2013 4:15  | 0.172732764 | 10/7/2013 19:00 | 0 |
| 10/11/2013 4:30  | 0.16990108  | 10/7/2013 19:10 | 0 |
| 10/11/2013 4:45  | 0.161406026 | 10/7/2013 19:20 | 0 |
| 10/11/2013 5:00  | 0.155742656 | 10/7/2013 19:30 | 0 |
| 10/11/2013 5:15  | 0.16990108  | 10/7/2013 19:40 | 0 |
| 10/11/2013 5:30  | 0.16990108  | 10/7/2013 19:50 | 0 |
| 10/11/2013 5:45  | 0.16990108  | 10/7/2013 20:00 | 0 |
| 10/11/2013 6:00  | 0.16423771  | 10/7/2013 20:10 | 0 |
| 10/11/2013 6:15  | 0.16423771  | 10/7/2013 20:20 | 0 |

|                  |             |                 |   |
|------------------|-------------|-----------------|---|
| 10/11/2013 6:30  | 0.172732764 | 10/7/2013 20:30 | 0 |
| 10/11/2013 6:45  | 0.16423771  | 10/7/2013 20:40 | 0 |
| 10/11/2013 7:00  | 0.172732764 | 10/7/2013 20:50 | 0 |
| 10/11/2013 7:15  | 0.172732764 | 10/7/2013 21:00 | 0 |
| 10/11/2013 7:30  | 0.178396134 | 10/7/2013 21:10 | 0 |
| 10/11/2013 7:45  | 0.181227818 | 10/7/2013 21:20 | 0 |
| 10/11/2013 8:00  | 0.186891188 | 10/7/2013 21:30 | 0 |
| 10/11/2013 8:15  | 0.201049611 | 10/7/2013 21:40 | 0 |
| 10/11/2013 8:30  | 0.209544665 | 10/7/2013 21:50 | 0 |
| 10/11/2013 8:45  | 0.201049611 | 10/7/2013 22:00 | 0 |
| 10/11/2013 9:00  | 0.223703088 | 10/7/2013 22:10 | 0 |
| 10/11/2013 9:15  | 0.229366457 | 10/7/2013 22:20 | 0 |
| 10/11/2013 9:30  | 0.229366457 | 10/7/2013 22:30 | 0 |
| 10/11/2013 9:45  | 0.229366457 | 10/7/2013 22:40 | 0 |
| 10/11/2013 10:00 | 0.223703088 | 10/7/2013 22:50 | 0 |
| 10/11/2013 10:15 | 0.235029827 | 10/7/2013 23:00 | 0 |
| 10/11/2013 10:30 | 0.229366457 | 10/7/2013 23:10 | 0 |
| 10/11/2013 10:45 | 0.218039719 | 10/7/2013 23:20 | 0 |
| 10/11/2013 11:00 | 0.223703088 | 10/7/2013 23:30 | 0 |
| 10/11/2013 11:15 | 0.229366457 | 10/7/2013 23:40 | 0 |
| 10/11/2013 11:30 | 0.229366457 | 10/7/2013 23:50 | 0 |
| 10/11/2013 11:45 | 0.209544665 | 10/8/2013 0:00  | 0 |
| 10/11/2013 12:00 | 0.223703088 | 10/8/2013 0:10  | 0 |
| 10/11/2013 12:15 | 0.223703088 | 10/8/2013 0:20  | 0 |
| 10/11/2013 12:30 | 0.229366457 | 10/8/2013 0:30  | 0 |
| 10/11/2013 12:45 | 0.218039719 | 10/8/2013 0:40  | 0 |
| 10/11/2013 13:00 | 0.203881296 | 10/8/2013 0:50  | 0 |
| 10/11/2013 13:15 | 0.215208034 | 10/8/2013 1:00  | 0 |
| 10/11/2013 13:30 | 0.218039719 | 10/8/2013 1:10  | 0 |
| 10/11/2013 13:45 | 0.209544665 | 10/8/2013 1:20  | 0 |
| 10/11/2013 14:00 | 0.209544665 | 10/8/2013 1:30  | 0 |
| 10/11/2013 14:15 | 0.203881296 | 10/8/2013 1:40  | 0 |
| 10/11/2013 14:30 | 0.201049611 | 10/8/2013 1:50  | 0 |
| 10/11/2013 14:45 | 0.209544665 | 10/8/2013 2:00  | 0 |
| 10/11/2013 15:00 | 0.203881296 | 10/8/2013 2:10  | 0 |
| 10/11/2013 15:15 | 0.209544665 | 10/8/2013 2:20  | 0 |
| 10/11/2013 15:30 | 0.209544665 | 10/8/2013 2:30  | 0 |
| 10/11/2013 15:45 | 0.203881296 | 10/8/2013 2:40  | 0 |
| 10/11/2013 16:00 | 0.209544665 | 10/8/2013 2:50  | 0 |
| 10/11/2013 16:15 | 0.209544665 | 10/8/2013 3:00  | 0 |
| 10/11/2013 16:30 | 0.201049611 | 10/8/2013 3:10  | 0 |
| 10/11/2013 16:45 | 0.201049611 | 10/8/2013 3:20  | 0 |
| 10/11/2013 17:00 | 0.203881296 | 10/8/2013 3:30  | 0 |
| 10/11/2013 17:15 | 0.209544665 | 10/8/2013 3:40  | 0 |
| 10/11/2013 17:30 | 0.201049611 | 10/8/2013 3:50  | 0 |
| 10/11/2013 17:45 | 0.201049611 | 10/8/2013 4:00  | 0 |
| 10/11/2013 18:00 | 0.201049611 | 10/8/2013 4:10  | 0 |

|                  |             |                 |   |
|------------------|-------------|-----------------|---|
| 10/11/2013 18:15 | 0.201049611 | 10/8/2013 4:20  | 0 |
| 10/11/2013 18:30 | 0.201049611 | 10/8/2013 4:30  | 0 |
| 10/11/2013 18:45 | 0.209544665 | 10/8/2013 4:40  | 0 |
| 10/11/2013 19:00 | 0.201049611 | 10/8/2013 4:50  | 0 |
| 10/11/2013 19:15 | 0.209544665 | 10/8/2013 5:00  | 0 |
| 10/11/2013 19:30 | 0.195386242 | 10/8/2013 5:10  | 0 |
| 10/11/2013 19:45 | 0.203881296 | 10/8/2013 5:20  | 0 |
| 10/11/2013 20:00 | 0.209544665 | 10/8/2013 5:30  | 0 |
| 10/11/2013 20:15 | 0.203881296 | 10/8/2013 5:40  | 0 |
| 10/11/2013 20:30 | 0.203881296 | 10/8/2013 5:50  | 0 |
| 10/11/2013 20:45 | 0.195386242 | 10/8/2013 6:00  | 0 |
| 10/11/2013 21:00 | 0.215208034 | 10/8/2013 6:10  | 0 |
| 10/11/2013 21:15 | 0.209544665 | 10/8/2013 6:20  | 0 |
| 10/11/2013 21:30 | 0.209544665 | 10/8/2013 6:30  | 0 |
| 10/11/2013 21:45 | 0.203881296 | 10/8/2013 6:40  | 0 |
| 10/11/2013 22:00 | 0.215208034 | 10/8/2013 6:50  | 0 |
| 10/11/2013 22:15 | 0.215208034 | 10/8/2013 7:00  | 0 |
| 10/11/2013 22:30 | 0.209544665 | 10/8/2013 7:10  | 0 |
| 10/11/2013 22:45 | 0.215208034 | 10/8/2013 7:20  | 0 |
| 10/11/2013 23:00 | 0.209544665 | 10/8/2013 7:30  | 0 |
| 10/11/2013 23:15 | 0.209544665 | 10/8/2013 7:40  | 0 |
| 10/11/2013 23:30 | 0.203881296 | 10/8/2013 7:50  | 0 |
| 10/11/2013 23:45 | 0.209544665 | 10/8/2013 8:00  | 0 |
| 10/12/2013 0:00  | 0.195386242 | 10/8/2013 8:10  | 0 |
| 10/12/2013 0:15  | 0.203881296 | 10/8/2013 8:20  | 0 |
| 10/12/2013 0:30  | 0.201049611 | 10/8/2013 8:30  | 0 |
| 10/12/2013 0:45  | 0.203881296 | 10/8/2013 8:40  | 0 |
| 10/12/2013 1:00  | 0.195386242 | 10/8/2013 8:50  | 0 |
| 10/12/2013 1:15  | 0.201049611 | 10/8/2013 9:00  | 0 |
| 10/12/2013 1:30  | 0.195386242 | 10/8/2013 9:10  | 0 |
| 10/12/2013 1:45  | 0.195386242 | 10/8/2013 9:20  | 0 |
| 10/12/2013 2:00  | 0.189722872 | 10/8/2013 9:30  | 0 |
| 10/12/2013 2:15  | 0.178396134 | 10/8/2013 9:40  | 0 |
| 10/12/2013 2:30  | 0.189722872 | 10/8/2013 9:50  | 0 |
| 10/12/2013 2:45  | 0.186891188 | 10/8/2013 10:00 | 0 |
| 10/12/2013 3:00  | 0.181227818 | 10/8/2013 10:10 | 0 |
| 10/12/2013 3:15  | 0.186891188 | 10/8/2013 10:20 | 0 |
| 10/12/2013 3:30  | 0.181227818 | 10/8/2013 10:30 | 0 |
| 10/12/2013 3:45  | 0.178396134 | 10/8/2013 10:40 | 0 |
| 10/12/2013 4:00  | 0.172732764 | 10/8/2013 10:50 | 0 |
| 10/12/2013 4:15  | 0.172732764 | 10/8/2013 11:00 | 0 |
| 10/12/2013 4:30  | 0.172732764 | 10/8/2013 11:10 | 0 |
| 10/12/2013 4:45  | 0.16990108  | 10/8/2013 11:20 | 0 |
| 10/12/2013 5:00  | 0.172732764 | 10/8/2013 11:30 | 0 |
| 10/12/2013 5:15  | 0.16423771  | 10/8/2013 11:40 | 0 |
| 10/12/2013 5:30  | 0.16423771  | 10/8/2013 11:50 | 0 |
| 10/12/2013 5:45  | 0.16990108  | 10/8/2013 12:00 | 0 |

|                  |             |                 |   |
|------------------|-------------|-----------------|---|
| 10/12/2013 6:00  | 0.16990108  | 10/8/2013 12:10 | 0 |
| 10/12/2013 6:15  | 0.16990108  | 10/8/2013 12:20 | 0 |
| 10/12/2013 6:30  | 0.172732764 | 10/8/2013 12:30 | 0 |
| 10/12/2013 6:45  | 0.172732764 | 10/8/2013 12:40 | 0 |
| 10/12/2013 7:00  | 0.16990108  | 10/8/2013 12:50 | 0 |
| 10/12/2013 7:15  | 0.16990108  | 10/8/2013 13:00 | 0 |
| 10/12/2013 7:30  | 0.172732764 | 10/8/2013 13:10 | 0 |
| 10/12/2013 7:45  | 0.172732764 | 10/8/2013 13:20 | 0 |
| 10/12/2013 8:00  | 0.178396134 | 10/8/2013 13:30 | 0 |
| 10/12/2013 8:15  | 0.172732764 | 10/8/2013 13:40 | 0 |
| 10/12/2013 8:30  | 0.178396134 | 10/8/2013 13:50 | 0 |
| 10/12/2013 8:45  | 0.186891188 | 10/8/2013 14:00 | 0 |
| 10/12/2013 9:00  | 0.186891188 | 10/8/2013 14:10 | 0 |
| 10/12/2013 9:15  | 0.186891188 | 10/8/2013 14:20 | 0 |
| 10/12/2013 9:30  | 0.195386242 | 10/8/2013 14:30 | 0 |
| 10/12/2013 9:45  | 0.201049611 | 10/8/2013 14:40 | 0 |
| 10/12/2013 10:00 | 0.189722872 | 10/8/2013 14:50 | 0 |
| 10/12/2013 10:15 | 0.209544665 | 10/8/2013 15:00 | 0 |
| 10/12/2013 10:30 | 0.215208034 | 10/8/2013 15:10 | 0 |
| 10/12/2013 10:45 | 0.223703088 | 10/8/2013 15:20 | 0 |
| 10/12/2013 11:00 | 0.223703088 | 10/8/2013 15:30 | 0 |
| 10/12/2013 11:15 | 0.223703088 | 10/8/2013 15:40 | 0 |
| 10/12/2013 11:30 | 0.229366457 | 10/8/2013 15:50 | 0 |
| 10/12/2013 11:45 | 0.229366457 | 10/8/2013 16:00 | 0 |
| 10/12/2013 12:00 | 0.235029827 | 10/8/2013 16:10 | 0 |
| 10/12/2013 12:15 | 0.229366457 | 10/8/2013 16:20 | 0 |
| 10/12/2013 12:30 | 0.240693196 | 10/8/2013 16:30 | 0 |
| 10/12/2013 12:45 | 0.240693196 | 10/8/2013 16:40 | 0 |
| 10/12/2013 13:00 | 0.240693196 | 10/8/2013 16:50 | 0 |
| 10/12/2013 13:15 | 0.243524881 | 10/8/2013 17:00 | 0 |
| 10/12/2013 13:30 | 0.229366457 | 10/8/2013 17:10 | 0 |
| 10/12/2013 13:45 | 0.240693196 | 10/8/2013 17:20 | 0 |
| 10/12/2013 14:00 | 0.235029827 | 10/8/2013 17:30 | 0 |
| 10/12/2013 14:15 | 0.235029827 | 10/8/2013 17:40 | 0 |
| 10/12/2013 14:30 | 0.223703088 | 10/8/2013 17:50 | 0 |
| 10/12/2013 14:45 | 0.229366457 | 10/8/2013 18:00 | 0 |
| 10/12/2013 15:00 | 0.223703088 | 10/8/2013 18:10 | 0 |
| 10/12/2013 15:15 | 0.229366457 | 10/8/2013 18:20 | 0 |
| 10/12/2013 15:30 | 0.218039719 | 10/8/2013 18:30 | 0 |
| 10/12/2013 15:45 | 0.218039719 | 10/8/2013 18:40 | 0 |
| 10/12/2013 16:00 | 0.209544665 | 10/8/2013 18:50 | 0 |
| 10/12/2013 16:15 | 0.215208034 | 10/8/2013 19:00 | 0 |
| 10/12/2013 16:30 | 0.201049611 | 10/8/2013 19:10 | 0 |
| 10/12/2013 16:45 | 0.215208034 | 10/8/2013 19:20 | 0 |
| 10/12/2013 17:00 | 0.209544665 | 10/8/2013 19:30 | 0 |
| 10/12/2013 17:15 | 0.203881296 | 10/8/2013 19:40 | 0 |
| 10/12/2013 17:30 | 0.209544665 | 10/8/2013 19:50 | 0 |



|                  |             |                 |   |
|------------------|-------------|-----------------|---|
| 10/12/2013 17:45 | 0.203881296 | 10/8/2013 20:00 | 0 |
| 10/12/2013 18:00 | 0.215208034 | 10/8/2013 20:10 | 0 |
| 10/12/2013 18:15 | 0.203881296 | 10/8/2013 20:20 | 0 |
| 10/12/2013 18:30 | 0.203881296 | 10/8/2013 20:30 | 0 |
| 10/12/2013 18:45 | 0.203881296 | 10/8/2013 20:40 | 0 |
| 10/12/2013 19:00 | 0.195386242 | 10/8/2013 20:50 | 0 |
| 10/12/2013 19:15 | 0.209544665 | 10/8/2013 21:00 | 0 |
| 10/12/2013 19:30 | 0.209544665 | 10/8/2013 21:10 | 0 |
| 10/12/2013 19:45 | 0.203881296 | 10/8/2013 21:20 | 0 |
| 10/12/2013 20:00 | 0.203881296 | 10/8/2013 21:30 | 0 |
| 10/12/2013 20:15 | 0.203881296 | 10/8/2013 21:40 | 0 |
| 10/12/2013 20:30 | 0.201049611 | 10/8/2013 21:50 | 0 |
| 10/12/2013 20:45 | 0.209544665 | 10/8/2013 22:00 | 0 |
| 10/12/2013 21:00 | 0.203881296 | 10/8/2013 22:10 | 0 |
| 10/12/2013 21:15 | 0.203881296 | 10/8/2013 22:20 | 0 |
| 10/12/2013 21:30 | 0.195386242 | 10/8/2013 22:30 | 0 |
| 10/12/2013 21:45 | 0.203881296 | 10/8/2013 22:40 | 0 |
| 10/12/2013 22:00 | 0.203881296 | 10/8/2013 22:50 | 0 |
| 10/12/2013 22:15 | 0.201049611 | 10/8/2013 23:00 | 0 |
| 10/12/2013 22:30 | 0.186891188 | 10/8/2013 23:10 | 0 |
| 10/12/2013 22:45 | 0.201049611 | 10/8/2013 23:20 | 0 |
| 10/12/2013 23:00 | 0.201049611 | 10/8/2013 23:30 | 0 |
| 10/12/2013 23:15 | 0.201049611 | 10/8/2013 23:40 | 0 |
| 10/12/2013 23:30 | 0.189722872 | 10/8/2013 23:50 | 0 |
| 10/12/2013 23:45 | 0.195386242 | 10/9/2013 0:00  | 0 |
| 10/13/2013 0:00  | 0.195386242 | 10/9/2013 0:10  | 0 |
| 10/13/2013 0:15  | 0.195386242 | 10/9/2013 0:20  | 0 |
| 10/13/2013 0:30  | 0.189722872 | 10/9/2013 0:30  | 0 |
| 10/13/2013 0:45  | 0.195386242 | 10/9/2013 0:40  | 0 |
| 10/13/2013 1:00  | 0.186891188 | 10/9/2013 0:50  | 0 |
| 10/13/2013 1:15  | 0.181227818 | 10/9/2013 1:00  | 0 |
| 10/13/2013 1:30  | 0.186891188 | 10/9/2013 1:10  | 0 |
| 10/13/2013 1:45  | 0.195386242 | 10/9/2013 1:20  | 0 |
| 10/13/2013 2:00  | 0.181227818 | 10/9/2013 1:30  | 0 |
| 10/13/2013 2:15  | 0.181227818 | 10/9/2013 1:40  | 0 |
| 10/13/2013 2:30  | 0.16990108  | 10/9/2013 1:50  | 0 |
| 10/13/2013 2:45  | 0.172732764 | 10/9/2013 2:00  | 0 |
| 10/13/2013 3:00  | 0.172732764 | 10/9/2013 2:10  | 0 |
| 10/13/2013 3:15  | 0.172732764 | 10/9/2013 2:20  | 0 |
| 10/13/2013 3:30  | 0.172732764 | 10/9/2013 2:30  | 0 |
| 10/13/2013 3:45  | 0.16990108  | 10/9/2013 2:40  | 0 |
| 10/13/2013 4:00  | 0.16990108  | 10/9/2013 2:50  | 0 |
| 10/13/2013 4:15  | 0.16423771  | 10/9/2013 3:00  | 0 |
| 10/13/2013 4:30  | 0.16990108  | 10/9/2013 3:10  | 0 |
| 10/13/2013 4:45  | 0.161406026 | 10/9/2013 3:20  | 0 |
| 10/13/2013 5:00  | 0.161406026 | 10/9/2013 3:30  | 0 |
| 10/13/2013 5:15  | 0.16423771  | 10/9/2013 3:40  | 0 |

|                  |             |                 |   |
|------------------|-------------|-----------------|---|
| 10/13/2013 5:30  | 0.16423771  | 10/9/2013 3:50  | 0 |
| 10/13/2013 5:45  | 0.161406026 | 10/9/2013 4:00  | 0 |
| 10/13/2013 6:00  | 0.161406026 | 10/9/2013 4:10  | 0 |
| 10/13/2013 6:15  | 0.161406026 | 10/9/2013 4:20  | 0 |
| 10/13/2013 6:30  | 0.155742656 | 10/9/2013 4:30  | 0 |
| 10/13/2013 6:45  | 0.155742656 | 10/9/2013 4:40  | 0 |
| 10/13/2013 7:00  | 0.161406026 | 10/9/2013 4:50  | 0 |
| 10/13/2013 7:15  | 0.152910972 | 10/9/2013 5:00  | 0 |
| 10/13/2013 7:30  | 0.161406026 | 10/9/2013 5:10  | 0 |
| 10/13/2013 7:45  | 0.161406026 | 10/9/2013 5:20  | 0 |
| 10/13/2013 8:00  | 0.161406026 | 10/9/2013 5:30  | 0 |
| 10/13/2013 8:15  | 0.155742656 | 10/9/2013 5:40  | 0 |
| 10/13/2013 8:30  | 0.16423771  | 10/9/2013 5:50  | 0 |
| 10/13/2013 8:45  | 0.161406026 | 10/9/2013 6:00  | 0 |
| 10/13/2013 9:00  | 0.16423771  | 10/9/2013 6:10  | 0 |
| 10/13/2013 9:15  | 0.16990108  | 10/9/2013 6:20  | 0 |
| 10/13/2013 9:30  | 0.178396134 | 10/9/2013 6:30  | 0 |
| 10/13/2013 9:45  | 0.181227818 | 10/9/2013 6:40  | 0 |
| 10/13/2013 10:00 | 0.181227818 | 10/9/2013 6:50  | 0 |
| 10/13/2013 10:15 | 0.178396134 | 10/9/2013 7:00  | 0 |
| 10/13/2013 10:30 | 0.195386242 | 10/9/2013 7:10  | 0 |
| 10/13/2013 10:45 | 0.195386242 | 10/9/2013 7:20  | 0 |
| 10/13/2013 11:00 | 0.209544665 | 10/9/2013 7:30  | 0 |
| 10/13/2013 11:15 | 0.209544665 | 10/9/2013 7:40  | 0 |
| 10/13/2013 11:30 | 0.215208034 | 10/9/2013 7:50  | 0 |
| 10/13/2013 11:45 | 0.215208034 | 10/9/2013 8:00  | 0 |
| 10/13/2013 12:00 | 0.240693196 | 10/9/2013 8:10  | 0 |
| 10/13/2013 12:15 | 0.218039719 | 10/9/2013 8:20  | 0 |
| 10/13/2013 12:30 | 0.223703088 | 10/9/2013 8:30  | 0 |
| 10/13/2013 12:45 | 0.209544665 | 10/9/2013 8:40  | 0 |
| 10/13/2013 13:00 | 0.229366457 | 10/9/2013 8:50  | 0 |
| 10/13/2013 13:15 | 0.223703088 | 10/9/2013 9:00  | 0 |
| 10/13/2013 13:30 | 0.223703088 | 10/9/2013 9:10  | 0 |
| 10/13/2013 13:45 | 0.223703088 | 10/9/2013 9:20  | 0 |
| 10/13/2013 14:00 | 0.223703088 | 10/9/2013 9:30  | 0 |
| 10/13/2013 14:15 | 0.218039719 | 10/9/2013 9:40  | 0 |
| 10/13/2013 14:30 | 0.209544665 | 10/9/2013 9:50  | 0 |
| 10/13/2013 14:45 | 0.209544665 | 10/9/2013 10:00 | 0 |
| 10/13/2013 15:00 | 0.218039719 | 10/9/2013 10:10 | 0 |
| 10/13/2013 15:15 | 0.209544665 | 10/9/2013 10:20 | 0 |
| 10/13/2013 15:30 | 0.209544665 | 10/9/2013 10:30 | 0 |
| 10/13/2013 15:45 | 0.203881296 | 10/9/2013 10:40 | 0 |
| 10/13/2013 16:00 | 0.215208034 | 10/9/2013 10:50 | 0 |
| 10/13/2013 16:15 | 0.203881296 | 10/9/2013 11:00 | 0 |
| 10/13/2013 16:30 | 0.203881296 | 10/9/2013 11:10 | 0 |
| 10/13/2013 16:45 | 0.201049611 | 10/9/2013 11:20 | 0 |
| 10/13/2013 17:00 | 0.203881296 | 10/9/2013 11:30 | 0 |

|                  |             |                 |   |
|------------------|-------------|-----------------|---|
| 10/13/2013 17:15 | 0.201049611 | 10/9/2013 11:40 | 0 |
| 10/13/2013 17:30 | 0.201049611 | 10/9/2013 11:50 | 0 |
| 10/13/2013 17:45 | 0.195386242 | 10/9/2013 12:00 | 0 |
| 10/13/2013 18:00 | 0.203881296 | 10/9/2013 12:10 | 0 |
| 10/13/2013 18:15 | 0.201049611 | 10/9/2013 12:20 | 0 |
| 10/13/2013 18:30 | 0.195386242 | 10/9/2013 12:30 | 0 |
| 10/13/2013 18:45 | 0.201049611 | 10/9/2013 12:40 | 0 |
| 10/13/2013 19:00 | 0.195386242 | 10/9/2013 12:50 | 0 |
| 10/13/2013 19:15 | 0.203881296 | 10/9/2013 13:00 | 0 |
| 10/13/2013 19:30 | 0.201049611 | 10/9/2013 13:10 | 0 |
| 10/13/2013 19:45 | 0.203881296 | 10/9/2013 13:20 | 0 |
| 10/13/2013 20:00 | 0.209544665 | 10/9/2013 13:30 | 0 |
| 10/13/2013 20:15 | 0.203881296 | 10/9/2013 13:40 | 0 |
| 10/13/2013 20:30 | 0.203881296 | 10/9/2013 13:50 | 0 |
| 10/13/2013 20:45 | 0.203881296 | 10/9/2013 14:00 | 0 |
| 10/13/2013 21:00 | 0.215208034 | 10/9/2013 14:10 | 0 |
| 10/13/2013 21:15 | 0.209544665 | 10/9/2013 14:20 | 0 |
| 10/13/2013 21:30 | 0.215208034 | 10/9/2013 14:30 | 0 |
| 10/13/2013 21:45 | 0.215208034 | 10/9/2013 14:40 | 0 |
| 10/13/2013 22:00 | 0.218039719 | 10/9/2013 14:50 | 0 |
| 10/13/2013 22:15 | 0.203881296 | 10/9/2013 15:00 | 0 |
| 10/13/2013 22:30 | 0.209544665 | 10/9/2013 15:10 | 0 |
| 10/13/2013 22:45 | 0.218039719 | 10/9/2013 15:20 | 0 |
| 10/13/2013 23:00 | 0.215208034 | 10/9/2013 15:30 | 0 |
| 10/13/2013 23:15 | 0.209544665 | 10/9/2013 15:40 | 0 |
| 10/13/2013 23:30 | 0.209544665 | 10/9/2013 15:50 | 0 |
| 10/13/2013 23:45 | 0.215208034 | 10/9/2013 16:00 | 0 |
| 10/14/2013 0:00  | 0.195386242 | 10/9/2013 16:10 | 0 |
| 10/14/2013 0:15  | 0.201049611 | 10/9/2013 16:20 | 0 |
| 10/14/2013 0:30  | 0.201049611 | 10/9/2013 16:30 | 0 |
| 10/14/2013 0:45  | 0.195386242 | 10/9/2013 16:40 | 0 |
| 10/14/2013 1:00  | 0.189722872 | 10/9/2013 16:50 | 0 |
| 10/14/2013 1:15  | 0.189722872 | 10/9/2013 17:00 | 0 |
| 10/14/2013 1:30  | 0.186891188 | 10/9/2013 17:10 | 0 |
| 10/14/2013 1:45  | 0.181227818 | 10/9/2013 17:20 | 0 |
| 10/14/2013 2:00  | 0.178396134 | 10/9/2013 17:30 | 0 |
| 10/14/2013 2:15  | 0.16990108  | 10/9/2013 17:40 | 0 |
| 10/14/2013 2:30  | 0.16990108  | 10/9/2013 17:50 | 0 |
| 10/14/2013 2:45  | 0.16990108  | 10/9/2013 18:00 | 0 |
| 10/14/2013 3:00  | 0.161406026 | 10/9/2013 18:10 | 0 |
| 10/14/2013 3:15  | 0.161406026 | 10/9/2013 18:20 | 0 |
| 10/14/2013 3:30  | 0.161406026 | 10/9/2013 18:30 | 0 |
| 10/14/2013 3:45  | 0.161406026 | 10/9/2013 18:40 | 0 |
| 10/14/2013 4:00  | 0.155742656 | 10/9/2013 18:50 | 0 |
| 10/14/2013 4:15  | 0.152910972 | 10/9/2013 19:00 | 0 |
| 10/14/2013 4:30  | 0.152910972 | 10/9/2013 19:10 | 0 |
| 10/14/2013 4:45  | 0.155742656 | 10/9/2013 19:20 | 0 |

|                  |             |                 |   |
|------------------|-------------|-----------------|---|
| 10/14/2013 5:00  | 0.155742656 | 10/9/2013 19:30 | 0 |
| 10/14/2013 5:15  | 0.152910972 | 10/9/2013 19:40 | 0 |
| 10/14/2013 5:30  | 0.155742656 | 10/9/2013 19:50 | 0 |
| 10/14/2013 5:45  | 0.155742656 | 10/9/2013 20:00 | 0 |
| 10/14/2013 6:00  | 0.152910972 | 10/9/2013 20:10 | 0 |
| 10/14/2013 6:15  | 0.152910972 | 10/9/2013 20:20 | 0 |
| 10/14/2013 6:30  | 0.155742656 | 10/9/2013 20:30 | 0 |
| 10/14/2013 6:45  | 0.155742656 | 10/9/2013 20:40 | 0 |
| 10/14/2013 7:00  | 0.152910972 | 10/9/2013 20:50 | 0 |
| 10/14/2013 7:15  | 0.161406026 | 10/9/2013 21:00 | 0 |
| 10/14/2013 7:30  | 0.161406026 | 10/9/2013 21:10 | 0 |
| 10/14/2013 7:45  | 0.16990108  | 10/9/2013 21:20 | 0 |
| 10/14/2013 8:00  | 0.172732764 | 10/9/2013 21:30 | 0 |
| 10/14/2013 8:15  | 0.181227818 | 10/9/2013 21:40 | 0 |
| 10/14/2013 8:30  | 0.186891188 | 10/9/2013 21:50 | 0 |
| 10/14/2013 8:45  | 0.201049611 | 10/9/2013 22:00 | 0 |
| 10/14/2013 9:00  | 0.201049611 | 10/9/2013 22:10 | 0 |
| 10/14/2013 9:15  | 0.203881296 | 10/9/2013 22:20 | 0 |
| 10/14/2013 9:30  | 0.215208034 | 10/9/2013 22:30 | 0 |
| 10/14/2013 9:45  | 0.209544665 | 10/9/2013 22:40 | 0 |
| 10/14/2013 10:00 | 0.218039719 | 10/9/2013 22:50 | 0 |
| 10/14/2013 10:15 | 0.218039719 | 10/9/2013 23:00 | 0 |
| 10/14/2013 10:30 | 0.215208034 | 10/9/2013 23:10 | 0 |
| 10/14/2013 10:45 | 0.223703088 | 10/9/2013 23:20 | 0 |
| 10/14/2013 11:00 | 0.218039719 | 10/9/2013 23:30 | 0 |
| 10/14/2013 11:15 | 0.218039719 | 10/9/2013 23:40 | 0 |
| 10/14/2013 11:30 | 0.215208034 | 10/9/2013 23:50 | 0 |
| 10/14/2013 11:45 | 0.215208034 | 10/10/2013 0:00 | 0 |
| 10/14/2013 12:00 | 0.209544665 | 10/10/2013 0:10 | 0 |
| 10/14/2013 12:15 | 0.201049611 | 10/10/2013 0:20 | 0 |
| 10/14/2013 12:30 | 0.209544665 | 10/10/2013 0:30 | 0 |
| 10/14/2013 12:45 | 0.209544665 | 10/10/2013 0:40 | 0 |
| 10/14/2013 13:00 | 0.203881296 | 10/10/2013 0:50 | 0 |
| 10/14/2013 13:15 | 0.203881296 | 10/10/2013 1:00 | 0 |
| 10/14/2013 13:30 | 0.203881296 | 10/10/2013 1:10 | 0 |
| 10/14/2013 13:45 | 0.201049611 | 10/10/2013 1:20 | 0 |
| 10/14/2013 14:00 | 0.201049611 | 10/10/2013 1:30 | 0 |
| 10/14/2013 14:15 | 0.201049611 | 10/10/2013 1:40 | 0 |
| 10/14/2013 14:30 | 0.201049611 | 10/10/2013 1:50 | 0 |
| 10/14/2013 14:45 | 0.195386242 | 10/10/2013 2:00 | 0 |
| 10/14/2013 15:00 | 0.201049611 | 10/10/2013 2:10 | 0 |
| 10/14/2013 15:15 | 0.201049611 | 10/10/2013 2:20 | 0 |
| 10/14/2013 15:30 | 0.195386242 | 10/10/2013 2:30 | 0 |
| 10/14/2013 15:45 | 0.201049611 | 10/10/2013 2:40 | 0 |
| 10/14/2013 16:00 | 0.195386242 | 10/10/2013 2:50 | 0 |
| 10/14/2013 16:15 | 0.186891188 | 10/10/2013 3:00 | 0 |
| 10/14/2013 16:30 | 0.195386242 | 10/10/2013 3:10 | 0 |

|                  |             |                  |   |
|------------------|-------------|------------------|---|
| 10/14/2013 16:45 | 0.189722872 | 10/10/2013 3:20  | 0 |
| 10/14/2013 17:00 | 0.189722872 | 10/10/2013 3:30  | 0 |
| 10/14/2013 17:15 | 0.186891188 | 10/10/2013 3:40  | 0 |
| 10/14/2013 17:30 | 0.189722872 | 10/10/2013 3:50  | 0 |
| 10/14/2013 17:45 | 0.195386242 | 10/10/2013 4:00  | 0 |
| 10/14/2013 18:00 | 0.186891188 | 10/10/2013 4:10  | 0 |
| 10/14/2013 18:15 | 0.195386242 | 10/10/2013 4:20  | 0 |
| 10/14/2013 18:30 | 0.181227818 | 10/10/2013 4:30  | 0 |
| 10/14/2013 18:45 | 0.186891188 | 10/10/2013 4:40  | 0 |
| 10/14/2013 19:00 | 0.189722872 | 10/10/2013 4:50  | 0 |
| 10/14/2013 19:15 | 0.189722872 | 10/10/2013 5:00  | 0 |
| 10/14/2013 19:30 | 0.195386242 | 10/10/2013 5:10  | 0 |
| 10/14/2013 19:45 | 0.201049611 | 10/10/2013 5:20  | 0 |
| 10/14/2013 20:00 | 0.201049611 | 10/10/2013 5:30  | 0 |
| 10/14/2013 20:15 | 0.203881296 | 10/10/2013 5:40  | 0 |
| 10/14/2013 20:30 | 0.201049611 | 10/10/2013 5:50  | 0 |
| 10/14/2013 20:45 | 0.209544665 | 10/10/2013 6:00  | 0 |
| 10/14/2013 21:00 | 0.203881296 | 10/10/2013 6:10  | 0 |
| 10/14/2013 21:15 | 0.215208034 | 10/10/2013 6:20  | 0 |
| 10/14/2013 21:30 | 0.218039719 | 10/10/2013 6:30  | 0 |
| 10/14/2013 21:45 | 0.209544665 | 10/10/2013 6:40  | 0 |
| 10/14/2013 22:00 | 0.215208034 | 10/10/2013 6:50  | 0 |
| 10/14/2013 22:15 | 0.209544665 | 10/10/2013 7:00  | 0 |
| 10/14/2013 22:30 | 0.215208034 | 10/10/2013 7:10  | 0 |
| 10/14/2013 22:45 | 0.218039719 | 10/10/2013 7:20  | 0 |
| 10/14/2013 23:00 | 0.209544665 | 10/10/2013 7:30  | 0 |
| 10/14/2013 23:15 | 0.215208034 | 10/10/2013 7:40  | 0 |
| 10/14/2013 23:30 | 0.209544665 | 10/10/2013 7:50  | 0 |
| 10/14/2013 23:45 | 0.209544665 | 10/10/2013 8:00  | 0 |
| 10/15/2013 0:00  | 0.203881296 | 10/10/2013 8:10  | 0 |
| 10/15/2013 0:15  | 0.201049611 | 10/10/2013 8:20  | 0 |
| 10/15/2013 0:30  | 0.201049611 | 10/10/2013 8:30  | 0 |
| 10/15/2013 0:45  | 0.201049611 | 10/10/2013 8:40  | 0 |
| 10/15/2013 1:00  | 0.203881296 | 10/10/2013 8:50  | 0 |
| 10/15/2013 1:15  | 0.203881296 | 10/10/2013 9:00  | 0 |
| 10/15/2013 1:30  | 0.201049611 | 10/10/2013 9:10  | 0 |
| 10/15/2013 1:45  | 0.195386242 | 10/10/2013 9:20  | 0 |
| 10/15/2013 2:00  | 0.243524881 | 10/10/2013 9:30  | 0 |
| 10/15/2013 2:15  | 0.368119006 | 10/10/2013 9:40  | 0 |
| 10/15/2013 2:30  | 0.509703239 | 10/10/2013 9:50  | 0 |
| 10/15/2013 2:45  | 0.509703239 | 10/10/2013 10:00 | 0 |
| 10/15/2013 3:00  | 0.509703239 | 10/10/2013 10:10 | 0 |
| 10/15/2013 3:15  | 0.453069546 | 10/10/2013 10:20 | 0 |
| 10/15/2013 3:30  | 0.396435852 | 10/10/2013 10:30 | 0 |
| 10/15/2013 3:45  | 0.339802159 | 10/10/2013 10:40 | 0 |
| 10/15/2013 4:00  | 0.311485313 | 10/10/2013 10:50 | 0 |
| 10/15/2013 4:15  | 0.277505097 | 10/10/2013 11:00 | 0 |

|                  |             |                  |   |
|------------------|-------------|------------------|---|
| 10/15/2013 4:30  | 0.277505097 | 10/10/2013 11:10 | 0 |
| 10/15/2013 4:45  | 0.283168466 | 10/10/2013 11:20 | 0 |
| 10/15/2013 5:00  | 0.283168466 | 10/10/2013 11:30 | 0 |
| 10/15/2013 5:15  | 0.311485313 | 10/10/2013 11:40 | 0 |
| 10/15/2013 5:30  | 0.311485313 | 10/10/2013 11:50 | 0 |
| 10/15/2013 5:45  | 0.339802159 | 10/10/2013 12:00 | 0 |
| 10/15/2013 6:00  | 0.339802159 | 10/10/2013 12:10 | 0 |
| 10/15/2013 6:15  | 0.311485313 | 10/10/2013 12:20 | 0 |
| 10/15/2013 6:30  | 0.311485313 | 10/10/2013 12:30 | 0 |
| 10/15/2013 6:45  | 0.311485313 | 10/10/2013 12:40 | 0 |
| 10/15/2013 7:00  | 0.311485313 | 10/10/2013 12:50 | 0 |
| 10/15/2013 7:15  | 0.311485313 | 10/10/2013 13:00 | 0 |
| 10/15/2013 7:30  | 0.283168466 | 10/10/2013 13:10 | 0 |
| 10/15/2013 7:45  | 0.283168466 | 10/10/2013 13:20 | 0 |
| 10/15/2013 8:00  | 0.283168466 | 10/10/2013 13:30 | 0 |
| 10/15/2013 8:15  | 0.311485313 | 10/10/2013 13:40 | 0 |
| 10/15/2013 8:30  | 0.311485313 | 10/10/2013 13:50 | 0 |
| 10/15/2013 8:45  | 0.311485313 | 10/10/2013 14:00 | 0 |
| 10/15/2013 9:00  | 0.311485313 | 10/10/2013 14:10 | 0 |
| 10/15/2013 9:15  | 0.311485313 | 10/10/2013 14:20 | 0 |
| 10/15/2013 9:30  | 0.311485313 | 10/10/2013 14:30 | 0 |
| 10/15/2013 9:45  | 0.283168466 | 10/10/2013 14:40 | 0 |
| 10/15/2013 10:00 | 0.283168466 | 10/10/2013 14:50 | 0 |
| 10/15/2013 10:15 | 0.283168466 | 10/10/2013 15:00 | 0 |
| 10/15/2013 10:30 | 0.277505097 | 10/10/2013 15:10 | 0 |
| 10/15/2013 10:45 | 0.283168466 | 10/10/2013 15:20 | 0 |
| 10/15/2013 11:00 | 0.283168466 | 10/10/2013 15:30 | 0 |
| 10/15/2013 11:15 | 0.277505097 | 10/10/2013 15:40 | 0 |
| 10/15/2013 11:30 | 0.266178358 | 10/10/2013 15:50 | 0 |
| 10/15/2013 11:45 | 0.266178358 | 10/10/2013 16:00 | 0 |
| 10/15/2013 12:00 | 0.266178358 | 10/10/2013 16:10 | 0 |
| 10/15/2013 12:15 | 0.260514989 | 10/10/2013 16:20 | 0 |
| 10/15/2013 12:30 | 0.254851619 | 10/10/2013 16:30 | 0 |
| 10/15/2013 12:45 | 0.24918825  | 10/10/2013 16:40 | 0 |
| 10/15/2013 13:00 | 0.260514989 | 10/10/2013 16:50 | 0 |
| 10/15/2013 13:15 | 0.243524881 | 10/10/2013 17:00 | 0 |
| 10/15/2013 13:30 | 0.254851619 | 10/10/2013 17:10 | 0 |
| 10/15/2013 13:45 | 0.254851619 | 10/10/2013 17:20 | 0 |
| 10/15/2013 14:00 | 0.24918825  | 10/10/2013 17:30 | 0 |
| 10/15/2013 14:15 | 0.24918825  | 10/10/2013 17:40 | 0 |
| 10/15/2013 14:30 | 0.24918825  | 10/10/2013 17:50 | 0 |
| 10/15/2013 14:45 | 0.24918825  | 10/10/2013 18:00 | 0 |
| 10/15/2013 15:00 | 0.243524881 | 10/10/2013 18:10 | 0 |
| 10/15/2013 15:15 | 0.243524881 | 10/10/2013 18:20 | 0 |
| 10/15/2013 15:30 | 0.243524881 | 10/10/2013 18:30 | 0 |
| 10/15/2013 15:45 | 0.240693196 | 10/10/2013 18:40 | 0 |
| 10/15/2013 16:00 | 0.243524881 | 10/10/2013 18:50 | 0 |

|                  |             |                  |   |
|------------------|-------------|------------------|---|
| 10/15/2013 16:15 | 0.243524881 | 10/10/2013 19:00 | 0 |
| 10/15/2013 16:30 | 0.229366457 | 10/10/2013 19:10 | 0 |
| 10/15/2013 16:45 | 0.240693196 | 10/10/2013 19:20 | 0 |
| 10/15/2013 17:00 | 0.229366457 | 10/10/2013 19:30 | 0 |
| 10/15/2013 17:15 | 0.235029827 | 10/10/2013 19:40 | 0 |
| 10/15/2013 17:30 | 0.235029827 | 10/10/2013 19:50 | 0 |
| 10/15/2013 17:45 | 0.235029827 | 10/10/2013 20:00 | 0 |
| 10/15/2013 18:00 | 0.235029827 | 10/10/2013 20:10 | 0 |
| 10/15/2013 18:15 | 0.229366457 | 10/10/2013 20:20 | 0 |
| 10/15/2013 18:30 | 0.229366457 | 10/10/2013 20:30 | 0 |
| 10/15/2013 18:45 | 0.223703088 | 10/10/2013 20:40 | 0 |
| 10/15/2013 19:00 | 0.235029827 | 10/10/2013 20:50 | 0 |
| 10/15/2013 19:15 | 0.240693196 | 10/10/2013 21:00 | 0 |
| 10/15/2013 19:30 | 0.240693196 | 10/10/2013 21:10 | 0 |
| 10/15/2013 19:45 | 0.240693196 | 10/10/2013 21:20 | 0 |
| 10/15/2013 20:00 | 0.240693196 | 10/10/2013 21:30 | 0 |
| 10/15/2013 20:15 | 0.240693196 | 10/10/2013 21:40 | 0 |
| 10/15/2013 20:30 | 0.235029827 | 10/10/2013 21:50 | 0 |
| 10/15/2013 20:45 | 0.243524881 | 10/10/2013 22:00 | 0 |
| 10/15/2013 21:00 | 0.24918825  | 10/10/2013 22:10 | 0 |
| 10/15/2013 21:15 | 0.243524881 | 10/10/2013 22:20 | 0 |
| 10/15/2013 21:30 | 0.235029827 | 10/10/2013 22:30 | 0 |
| 10/15/2013 21:45 | 0.254851619 | 10/10/2013 22:40 | 0 |
| 10/15/2013 22:00 | 0.240693196 | 10/10/2013 22:50 | 0 |
| 10/15/2013 22:15 | 0.243524881 | 10/10/2013 23:00 | 0 |
| 10/15/2013 22:30 | 0.24918825  | 10/10/2013 23:10 | 0 |
| 10/15/2013 22:45 | 0.243524881 | 10/10/2013 23:20 | 0 |
| 10/15/2013 23:00 | 0.24918825  | 10/10/2013 23:30 | 0 |
| 10/15/2013 23:15 | 0.260514989 | 10/10/2013 23:40 | 0 |
| 10/15/2013 23:30 | 0.240693196 | 10/10/2013 23:50 | 0 |
| 10/15/2013 23:45 | 0.235029827 | 10/11/2013 0:00  | 0 |
| 10/16/2013 0:00  | 0.240693196 | 10/11/2013 0:10  | 0 |
| 10/16/2013 0:15  | 0.235029827 | 10/11/2013 0:20  | 0 |
| 10/16/2013 0:30  | 0.235029827 | 10/11/2013 0:30  | 0 |
| 10/16/2013 0:45  | 0.235029827 | 10/11/2013 0:40  | 0 |
| 10/16/2013 1:00  | 0.223703088 | 10/11/2013 0:50  | 0 |
| 10/16/2013 1:15  | 0.229366457 | 10/11/2013 1:00  | 0 |
| 10/16/2013 1:30  | 0.229366457 | 10/11/2013 1:10  | 0 |
| 10/16/2013 1:45  | 0.215208034 | 10/11/2013 1:20  | 0 |
| 10/16/2013 2:00  | 0.215208034 | 10/11/2013 1:30  | 0 |
| 10/16/2013 2:15  | 0.215208034 | 10/11/2013 1:40  | 0 |
| 10/16/2013 2:30  | 0.195386242 | 10/11/2013 1:50  | 0 |
| 10/16/2013 2:45  | 0.201049611 | 10/11/2013 2:00  | 0 |
| 10/16/2013 3:00  | 0.201049611 | 10/11/2013 2:10  | 0 |
| 10/16/2013 3:15  | 0.195386242 | 10/11/2013 2:20  | 0 |
| 10/16/2013 3:30  | 0.195386242 | 10/11/2013 2:30  | 0 |
| 10/16/2013 3:45  | 0.195386242 | 10/11/2013 2:40  | 0 |

|                  |             |                  |   |
|------------------|-------------|------------------|---|
| 10/16/2013 4:00  | 0.186891188 | 10/11/2013 2:50  | 0 |
| 10/16/2013 4:15  | 0.189722872 | 10/11/2013 3:00  | 0 |
| 10/16/2013 4:30  | 0.195386242 | 10/11/2013 3:10  | 0 |
| 10/16/2013 4:45  | 0.181227818 | 10/11/2013 3:20  | 0 |
| 10/16/2013 5:00  | 0.181227818 | 10/11/2013 3:30  | 0 |
| 10/16/2013 5:15  | 0.195386242 | 10/11/2013 3:40  | 0 |
| 10/16/2013 5:30  | 0.186891188 | 10/11/2013 3:50  | 0 |
| 10/16/2013 5:45  | 0.186891188 | 10/11/2013 4:00  | 0 |
| 10/16/2013 6:00  | 0.186891188 | 10/11/2013 4:10  | 0 |
| 10/16/2013 6:15  | 0.181227818 | 10/11/2013 4:20  | 0 |
| 10/16/2013 6:30  | 0.181227818 | 10/11/2013 4:30  | 0 |
| 10/16/2013 6:45  | 0.189722872 | 10/11/2013 4:40  | 0 |
| 10/16/2013 7:00  | 0.178396134 | 10/11/2013 4:50  | 0 |
| 10/16/2013 7:15  | 0.195386242 | 10/11/2013 5:00  | 0 |
| 10/16/2013 7:30  | 0.181227818 | 10/11/2013 5:10  | 0 |
| 10/16/2013 7:45  | 0.203881296 | 10/11/2013 5:20  | 0 |
| 10/16/2013 8:00  | 0.203881296 | 10/11/2013 5:30  | 0 |
| 10/16/2013 8:15  | 0.209544665 | 10/11/2013 5:40  | 0 |
| 10/16/2013 8:30  | 0.209544665 | 10/11/2013 5:50  | 0 |
| 10/16/2013 8:45  | 0.229366457 | 10/11/2013 6:00  | 0 |
| 10/16/2013 9:00  | 0.229366457 | 10/11/2013 6:10  | 0 |
| 10/16/2013 9:15  | 0.240693196 | 10/11/2013 6:20  | 0 |
| 10/16/2013 9:30  | 0.229366457 | 10/11/2013 6:30  | 0 |
| 10/16/2013 9:45  | 0.229366457 | 10/11/2013 6:40  | 0 |
| 10/16/2013 10:00 | 0.243524881 | 10/11/2013 6:50  | 0 |
| 10/16/2013 10:15 | 0.243524881 | 10/11/2013 7:00  | 0 |
| 10/16/2013 10:30 | 0.235029827 | 10/11/2013 7:10  | 0 |
| 10/16/2013 10:45 | 0.235029827 | 10/11/2013 7:20  | 0 |
| 10/16/2013 11:00 | 0.243524881 | 10/11/2013 7:30  | 0 |
| 10/16/2013 11:15 | 0.235029827 | 10/11/2013 7:40  | 0 |
| 10/16/2013 11:30 | 0.223703088 | 10/11/2013 7:50  | 0 |
| 10/16/2013 11:45 | 0.229366457 | 10/11/2013 8:00  | 0 |
| 10/16/2013 12:00 | 0.235029827 | 10/11/2013 8:10  | 0 |
| 10/16/2013 12:15 | 0.235029827 | 10/11/2013 8:20  | 0 |
| 10/16/2013 12:30 | 0.223703088 | 10/11/2013 8:30  | 0 |
| 10/16/2013 12:45 | 0.223703088 | 10/11/2013 8:40  | 0 |
| 10/16/2013 13:00 | 0.229366457 | 10/11/2013 8:50  | 0 |
| 10/16/2013 13:15 | 0.209544665 | 10/11/2013 9:00  | 0 |
| 10/16/2013 13:30 | 0.218039719 | 10/11/2013 9:10  | 0 |
| 10/16/2013 13:45 | 0.203881296 | 10/11/2013 9:20  | 0 |
| 10/16/2013 14:00 | 0.218039719 | 10/11/2013 9:30  | 0 |
| 10/16/2013 14:15 | 0.218039719 | 10/11/2013 9:40  | 0 |
| 10/16/2013 14:30 | 0.215208034 | 10/11/2013 9:50  | 0 |
| 10/16/2013 14:45 | 0.218039719 | 10/11/2013 10:00 | 0 |
| 10/16/2013 15:00 | 0.218039719 | 10/11/2013 10:10 | 0 |
| 10/16/2013 15:15 | 0.215208034 | 10/11/2013 10:20 | 0 |
| 10/16/2013 15:30 | 0.203881296 | 10/11/2013 10:30 | 0 |



|                  |             |                  |   |
|------------------|-------------|------------------|---|
| 10/16/2013 15:45 | 0.209544665 | 10/11/2013 10:40 | 0 |
| 10/16/2013 16:00 | 0.203881296 | 10/11/2013 10:50 | 0 |
| 10/16/2013 16:15 | 0.215208034 | 10/11/2013 11:00 | 0 |
| 10/16/2013 16:30 | 0.209544665 | 10/11/2013 11:10 | 0 |
| 10/16/2013 16:45 | 0.215208034 | 10/11/2013 11:20 | 0 |
| 10/16/2013 17:00 | 0.209544665 | 10/11/2013 11:30 | 0 |
| 10/16/2013 17:15 | 0.209544665 | 10/11/2013 11:40 | 0 |
| 10/16/2013 17:30 | 0.203881296 | 10/11/2013 11:50 | 0 |
| 10/16/2013 17:45 | 0.209544665 | 10/11/2013 12:00 | 0 |
| 10/16/2013 18:00 | 0.209544665 | 10/11/2013 12:10 | 0 |
| 10/16/2013 18:15 | 0.203881296 | 10/11/2013 12:20 | 0 |
| 10/16/2013 18:30 | 0.203881296 | 10/11/2013 12:30 | 0 |
| 10/16/2013 18:45 | 0.215208034 | 10/11/2013 12:40 | 0 |
| 10/16/2013 19:00 | 0.209544665 | 10/11/2013 12:50 | 0 |
| 10/16/2013 19:15 | 0.209544665 | 10/11/2013 13:00 | 0 |
| 10/16/2013 19:30 | 0.218039719 | 10/11/2013 13:10 | 0 |
| 10/16/2013 19:45 | 0.215208034 | 10/11/2013 13:20 | 0 |
| 10/16/2013 20:00 | 0.218039719 | 10/11/2013 13:30 | 0 |
| 10/16/2013 20:15 | 0.218039719 | 10/11/2013 13:40 | 0 |
| 10/16/2013 20:30 | 0.218039719 | 10/11/2013 13:50 | 0 |
| 10/16/2013 20:45 | 0.218039719 | 10/11/2013 14:00 | 0 |
| 10/16/2013 21:00 | 0.235029827 | 10/11/2013 14:10 | 0 |
| 10/16/2013 21:15 | 0.229366457 | 10/11/2013 14:20 | 0 |
| 10/16/2013 21:30 | 0.229366457 | 10/11/2013 14:30 | 0 |
| 10/16/2013 21:45 | 0.229366457 | 10/11/2013 14:40 | 0 |
| 10/16/2013 22:00 | 0.218039719 | 10/11/2013 14:50 | 0 |
| 10/16/2013 22:15 | 0.235029827 | 10/11/2013 15:00 | 0 |
| 10/16/2013 22:30 | 0.229366457 | 10/11/2013 15:10 | 0 |
| 10/16/2013 22:45 | 0.235029827 | 10/11/2013 15:20 | 0 |
| 10/16/2013 23:00 | 0.235029827 | 10/11/2013 15:30 | 0 |
| 10/16/2013 23:15 | 0.223703088 | 10/11/2013 15:40 | 0 |
| 10/16/2013 23:30 | 0.229366457 | 10/11/2013 15:50 | 0 |
| 10/16/2013 23:45 | 0.229366457 | 10/11/2013 16:00 | 0 |
| 10/17/2013 0:00  | 0.218039719 | 10/11/2013 16:10 | 0 |
| 10/17/2013 0:15  | 0.223703088 | 10/11/2013 16:20 | 0 |
| 10/17/2013 0:30  | 0.223703088 | 10/11/2013 16:30 | 0 |
| 10/17/2013 0:45  | 0.201049611 | 10/11/2013 16:40 | 0 |
| 10/17/2013 1:00  | 0.215208034 | 10/11/2013 16:50 | 0 |
| 10/17/2013 1:15  | 0.203881296 | 10/11/2013 17:00 | 0 |
| 10/17/2013 1:30  | 0.201049611 | 10/11/2013 17:10 | 0 |
| 10/17/2013 1:45  | 0.189722872 | 10/11/2013 17:20 | 0 |
| 10/17/2013 2:00  | 0.181227818 | 10/11/2013 17:30 | 0 |
| 10/17/2013 2:15  | 0.195386242 | 10/11/2013 17:40 | 0 |
| 10/17/2013 2:30  | 0.189722872 | 10/11/2013 17:50 | 0 |
| 10/17/2013 2:45  | 0.186891188 | 10/11/2013 18:00 | 0 |
| 10/17/2013 3:00  | 0.181227818 | 10/11/2013 18:10 | 0 |
| 10/17/2013 3:15  | 0.181227818 | 10/11/2013 18:20 | 0 |

|                  |             |                  |   |
|------------------|-------------|------------------|---|
| 10/17/2013 3:30  | 0.186891188 | 10/11/2013 18:30 | 0 |
| 10/17/2013 3:45  | 0.172732764 | 10/11/2013 18:40 | 0 |
| 10/17/2013 4:00  | 0.16990108  | 10/11/2013 18:50 | 0 |
| 10/17/2013 4:15  | 0.178396134 | 10/11/2013 19:00 | 0 |
| 10/17/2013 4:30  | 0.16990108  | 10/11/2013 19:10 | 0 |
| 10/17/2013 4:45  | 0.16423771  | 10/11/2013 19:20 | 0 |
| 10/17/2013 5:00  | 0.16990108  | 10/11/2013 19:30 | 0 |
| 10/17/2013 5:15  | 0.172732764 | 10/11/2013 19:40 | 0 |
| 10/17/2013 5:30  | 0.172732764 | 10/11/2013 19:50 | 0 |
| 10/17/2013 5:45  | 0.16990108  | 10/11/2013 20:00 | 0 |
| 10/17/2013 6:00  | 0.16990108  | 10/11/2013 20:10 | 0 |
| 10/17/2013 6:15  | 0.16990108  | 10/11/2013 20:20 | 0 |
| 10/17/2013 6:30  | 0.172732764 | 10/11/2013 20:30 | 0 |
| 10/17/2013 6:45  | 0.16990108  | 10/11/2013 20:40 | 0 |
| 10/17/2013 7:00  | 0.16990108  | 10/11/2013 20:50 | 0 |
| 10/17/2013 7:15  | 0.178396134 | 10/11/2013 21:00 | 0 |
| 10/17/2013 7:30  | 0.181227818 | 10/11/2013 21:10 | 0 |
| 10/17/2013 7:45  | 0.186891188 | 10/11/2013 21:20 | 0 |
| 10/17/2013 8:00  | 0.189722872 | 10/11/2013 21:30 | 0 |
| 10/17/2013 8:15  | 0.186891188 | 10/11/2013 21:40 | 0 |
| 10/17/2013 8:30  | 0.201049611 | 10/11/2013 21:50 | 0 |
| 10/17/2013 8:45  | 0.215208034 | 10/11/2013 22:00 | 0 |
| 10/17/2013 9:00  | 0.215208034 | 10/11/2013 22:10 | 0 |
| 10/17/2013 9:15  | 0.223703088 | 10/11/2013 22:20 | 0 |
| 10/17/2013 9:30  | 0.223703088 | 10/11/2013 22:30 | 0 |
| 10/17/2013 9:45  | 0.229366457 | 10/11/2013 22:40 | 0 |
| 10/17/2013 10:00 | 0.229366457 | 10/11/2013 22:50 | 0 |
| 10/17/2013 10:15 | 0.235029827 | 10/11/2013 23:00 | 0 |
| 10/17/2013 10:30 | 0.229366457 | 10/11/2013 23:10 | 0 |
| 10/17/2013 10:45 | 0.223703088 | 10/11/2013 23:20 | 0 |
| 10/17/2013 11:00 | 0.229366457 | 10/11/2013 23:30 | 0 |
| 10/17/2013 11:15 | 0.229366457 | 10/11/2013 23:40 | 0 |
| 10/17/2013 11:30 | 0.229366457 | 10/11/2013 23:50 | 0 |
| 10/17/2013 11:45 | 0.218039719 | 10/12/2013 0:00  | 0 |
| 10/17/2013 12:00 | 0.218039719 | 10/12/2013 0:10  | 0 |
| 10/17/2013 12:15 | 0.209544665 | 10/12/2013 0:20  | 0 |
| 10/17/2013 12:30 | 0.209544665 | 10/12/2013 0:30  | 0 |
| 10/17/2013 12:45 | 0.209544665 | 10/12/2013 0:40  | 0 |
| 10/17/2013 13:00 | 0.209544665 | 10/12/2013 0:50  | 0 |
| 10/17/2013 13:15 | 0.203881296 | 10/12/2013 1:00  | 0 |
| 10/17/2013 13:30 | 0.215208034 | 10/12/2013 1:10  | 0 |
| 10/17/2013 13:45 | 0.209544665 | 10/12/2013 1:20  | 0 |
| 10/17/2013 14:00 | 0.215208034 | 10/12/2013 1:30  | 0 |
| 10/17/2013 14:15 | 0.195386242 | 10/12/2013 1:40  | 0 |
| 10/17/2013 14:30 | 0.209544665 | 10/12/2013 1:50  | 0 |
| 10/17/2013 14:45 | 0.209544665 | 10/12/2013 2:00  | 0 |
| 10/17/2013 15:00 | 0.203881296 | 10/12/2013 2:10  | 0 |

|                  |             |                  |   |
|------------------|-------------|------------------|---|
| 10/17/2013 15:15 | 0.209544665 | 10/12/2013 2:20  | 0 |
| 10/17/2013 15:30 | 0.203881296 | 10/12/2013 2:30  | 0 |
| 10/17/2013 15:45 | 0.203881296 | 10/12/2013 2:40  | 0 |
| 10/17/2013 16:00 | 0.203881296 | 10/12/2013 2:50  | 0 |
| 10/17/2013 16:15 | 0.201049611 | 10/12/2013 3:00  | 0 |
| 10/17/2013 16:30 | 0.201049611 | 10/12/2013 3:10  | 0 |
| 10/17/2013 16:45 | 0.201049611 | 10/12/2013 3:20  | 0 |
| 10/17/2013 17:00 | 0.201049611 | 10/12/2013 3:30  | 0 |
| 10/17/2013 17:15 | 0.195386242 | 10/12/2013 3:40  | 0 |
| 10/17/2013 17:30 | 0.189722872 | 10/12/2013 3:50  | 0 |
| 10/17/2013 17:45 | 0.189722872 | 10/12/2013 4:10  | 0 |
| 10/17/2013 18:00 | 0.195386242 | 10/12/2013 4:20  | 0 |
| 10/17/2013 18:15 | 0.201049611 | 10/12/2013 4:30  | 0 |
| 10/17/2013 18:30 | 0.195386242 | 10/12/2013 4:40  | 0 |
| 10/17/2013 18:45 | 0.201049611 | 10/12/2013 4:50  | 0 |
| 10/17/2013 19:00 | 0.203881296 | 10/12/2013 5:00  | 0 |
| 10/17/2013 19:15 | 0.203881296 | 10/12/2013 5:10  | 0 |
| 10/17/2013 19:30 | 0.201049611 | 10/12/2013 5:20  | 0 |
| 10/17/2013 19:45 | 0.209544665 | 10/12/2013 5:30  | 0 |
| 10/17/2013 20:00 | 0.203881296 | 10/12/2013 5:40  | 0 |
| 10/17/2013 20:15 | 0.215208034 | 10/12/2013 5:50  | 0 |
| 10/17/2013 20:30 | 0.215208034 | 10/12/2013 6:00  | 0 |
| 10/17/2013 20:45 | 0.209544665 | 10/12/2013 6:10  | 0 |
| 10/17/2013 21:00 | 0.218039719 | 10/12/2013 6:20  | 0 |
| 10/17/2013 21:15 | 0.218039719 | 10/12/2013 6:30  | 0 |
| 10/17/2013 21:30 | 0.218039719 | 10/12/2013 6:40  | 0 |
| 10/17/2013 21:45 | 0.223703088 | 10/12/2013 6:50  | 0 |
| 10/17/2013 22:00 | 0.223703088 | 10/12/2013 7:00  | 0 |
| 10/17/2013 22:15 | 0.215208034 | 10/12/2013 7:10  | 0 |
| 10/17/2013 22:30 | 0.223703088 | 10/12/2013 7:20  | 0 |
| 10/17/2013 22:45 | 0.215208034 | 10/12/2013 7:30  | 0 |
| 10/17/2013 23:00 | 0.223703088 | 10/12/2013 7:40  | 0 |
| 10/17/2013 23:15 | 0.215208034 | 10/12/2013 7:50  | 0 |
| 10/17/2013 23:30 | 0.223703088 | 10/12/2013 8:00  | 0 |
| 10/17/2013 23:45 | 0.218039719 | 10/12/2013 8:10  | 0 |
| 10/18/2013 0:00  | 0.215208034 | 10/12/2013 8:20  | 0 |
| 10/18/2013 0:15  | 0.215208034 | 10/12/2013 8:30  | 0 |
| 10/18/2013 0:30  | 0.215208034 | 10/12/2013 8:40  | 0 |
| 10/18/2013 0:45  | 0.203881296 | 10/12/2013 8:50  | 0 |
| 10/18/2013 1:00  | 0.201049611 | 10/12/2013 9:00  | 0 |
| 10/18/2013 1:15  | 0.203881296 | 10/12/2013 9:10  | 0 |
| 10/18/2013 1:30  | 0.189722872 | 10/12/2013 9:20  | 0 |
| 10/18/2013 1:45  | 0.201049611 | 10/12/2013 9:30  | 0 |
| 10/18/2013 2:00  | 0.181227818 | 10/12/2013 9:40  | 0 |
| 10/18/2013 2:15  | 0.172732764 | 10/12/2013 9:50  | 0 |
| 10/18/2013 2:30  | 0.172732764 | 10/12/2013 10:00 | 0 |
| 10/18/2013 2:45  | 0.186891188 | 10/12/2013 10:10 | 0 |

|                  |             |                  |   |
|------------------|-------------|------------------|---|
| 10/18/2013 3:00  | 0.16423771  | 10/12/2013 10:20 | 0 |
| 10/18/2013 3:15  | 0.178396134 | 10/12/2013 10:30 | 0 |
| 10/18/2013 3:30  | 0.172732764 | 10/12/2013 10:40 | 0 |
| 10/18/2013 3:45  | 0.172732764 | 10/12/2013 10:50 | 0 |
| 10/18/2013 4:00  | 0.16423771  | 10/12/2013 11:00 | 0 |
| 10/18/2013 4:15  | 0.16423771  | 10/12/2013 11:10 | 0 |
| 10/18/2013 4:30  | 0.16423771  | 10/12/2013 11:20 | 0 |
| 10/18/2013 4:45  | 0.16990108  | 10/12/2013 11:30 | 0 |
| 10/18/2013 5:00  | 0.155742656 | 10/12/2013 11:40 | 0 |
| 10/18/2013 5:15  | 0.161406026 | 10/12/2013 11:50 | 0 |
| 10/18/2013 5:30  | 0.16423771  | 10/12/2013 12:00 | 0 |
| 10/18/2013 5:45  | 0.161406026 | 10/12/2013 12:10 | 0 |
| 10/18/2013 6:00  | 0.152910972 | 10/12/2013 12:20 | 0 |
| 10/18/2013 6:15  | 0.16423771  | 10/12/2013 12:30 | 0 |
| 10/18/2013 6:30  | 0.16423771  | 10/12/2013 12:40 | 0 |
| 10/18/2013 6:45  | 0.161406026 | 10/12/2013 12:50 | 0 |
| 10/18/2013 7:00  | 0.16423771  | 10/12/2013 13:00 | 0 |
| 10/18/2013 7:15  | 0.16990108  | 10/12/2013 13:10 | 0 |
| 10/18/2013 7:30  | 0.172732764 | 10/12/2013 13:20 | 0 |
| 10/18/2013 7:45  | 0.178396134 | 10/12/2013 13:30 | 0 |
| 10/18/2013 8:00  | 0.172732764 | 10/12/2013 13:40 | 0 |
| 10/18/2013 8:15  | 0.186891188 | 10/12/2013 13:50 | 0 |
| 10/18/2013 8:30  | 0.189722872 | 10/12/2013 14:00 | 0 |
| 10/18/2013 8:45  | 0.181227818 | 10/12/2013 14:10 | 0 |
| 10/18/2013 9:00  | 0.195386242 | 10/12/2013 14:20 | 0 |
| 10/18/2013 9:15  | 0.209544665 | 10/12/2013 14:30 | 0 |
| 10/18/2013 9:30  | 0.203881296 | 10/12/2013 14:40 | 0 |
| 10/18/2013 9:45  | 0.189722872 | 10/12/2013 14:50 | 0 |
| 10/18/2013 10:00 | 0.189722872 | 10/12/2013 15:00 | 0 |
| 10/18/2013 10:15 | 0.195386242 | 10/12/2013 15:10 | 0 |
| 10/18/2013 10:30 | 0.186891188 | 10/12/2013 15:20 | 0 |
| 10/18/2013 11:00 | 0.16423771  | 10/12/2013 15:30 | 0 |
| 10/18/2013 11:15 | 0.186891188 | 10/12/2013 15:40 | 0 |
| 10/18/2013 11:30 | 0.178396134 | 10/12/2013 15:50 | 0 |
| 10/18/2013 11:45 | 0.178396134 | 10/12/2013 16:00 | 0 |
| 10/18/2013 12:00 | 0.172732764 | 10/12/2013 16:10 | 0 |
| 10/18/2013 12:15 | 0.186891188 | 10/12/2013 16:20 | 0 |
| 10/18/2013 12:30 | 0.16423771  | 10/12/2013 16:30 | 0 |
| 10/18/2013 12:45 | 0.178396134 | 10/12/2013 16:40 | 0 |
| 10/18/2013 13:00 | 0.16423771  | 10/12/2013 16:50 | 0 |
| 10/18/2013 13:15 | 0.155742656 | 10/12/2013 17:00 | 0 |
| 10/18/2013 13:30 | 0.16423771  | 10/12/2013 17:10 | 0 |
| 10/18/2013 13:45 | 0.16990108  | 10/12/2013 17:20 | 0 |
| 10/18/2013 14:00 | 0.16990108  | 10/12/2013 17:30 | 0 |
| 10/18/2013 14:15 | 0.186891188 | 10/12/2013 17:40 | 0 |
| 10/18/2013 14:30 | 0.16990108  | 10/12/2013 17:50 | 0 |
| 10/18/2013 14:45 | 0.178396134 | 10/12/2013 18:00 | 0 |

|                  |             |                  |   |
|------------------|-------------|------------------|---|
| 10/18/2013 15:00 | 0.178396134 | 10/12/2013 18:10 | 0 |
| 10/18/2013 15:15 | 0.16423771  | 10/12/2013 18:20 | 0 |
| 10/18/2013 15:30 | 0.195386242 | 10/12/2013 18:30 | 0 |
| 10/18/2013 15:45 | 0.16990108  | 10/12/2013 18:40 | 0 |
| 10/18/2013 16:15 | 0.178396134 | 10/12/2013 18:50 | 0 |
| 10/18/2013 16:30 | 0.16423771  | 10/12/2013 19:00 | 0 |
| 10/18/2013 16:45 | 0.152910972 | 10/12/2013 19:10 | 0 |
| 10/18/2013 17:00 | 0.16990108  | 10/12/2013 19:20 | 0 |
| 10/18/2013 17:15 | 0.161406026 | 10/12/2013 19:30 | 0 |
| 10/18/2013 17:30 | 0.155742656 | 10/12/2013 19:40 | 0 |
| 10/18/2013 17:45 | 0.152910972 | 10/12/2013 19:50 | 0 |
| 10/18/2013 18:00 | 0.152910972 | 10/12/2013 20:00 | 0 |
| 10/18/2013 18:15 | 0.152910972 | 10/12/2013 20:10 | 0 |
| 10/18/2013 18:30 | 0.161406026 | 10/12/2013 20:20 | 0 |
| 10/18/2013 18:45 | 0.16990108  | 10/12/2013 20:30 | 0 |
| 10/18/2013 19:00 | 0.172732764 | 10/12/2013 20:40 | 0 |
| 10/18/2013 19:15 | 0.172732764 | 10/12/2013 20:50 | 0 |
| 10/18/2013 19:30 | 0.172732764 | 10/12/2013 21:00 | 0 |
| 10/18/2013 19:45 | 0.161406026 | 10/12/2013 21:10 | 0 |
| 10/18/2013 20:00 | 0.155742656 | 10/12/2013 21:20 | 0 |
| 10/18/2013 20:15 | 0.161406026 | 10/12/2013 21:30 | 0 |
| 10/18/2013 20:30 | 0.16990108  | 10/12/2013 21:40 | 0 |
| 10/18/2013 20:45 | 0.172732764 | 10/12/2013 21:50 | 0 |
| 10/18/2013 21:00 | 0.178396134 | 10/12/2013 22:00 | 0 |
| 10/18/2013 21:15 | 0.178396134 | 10/12/2013 22:10 | 0 |
| 10/18/2013 21:30 | 0.172732764 | 10/12/2013 22:20 | 0 |
| 10/18/2013 21:45 | 0.16990108  | 10/12/2013 22:30 | 0 |
| 10/18/2013 22:00 | 0.16990108  | 10/12/2013 22:40 | 0 |
| 10/18/2013 22:15 | 0.186891188 | 10/12/2013 22:50 | 0 |
| 10/18/2013 22:30 | 0.189722872 | 10/12/2013 23:00 | 0 |
| 10/18/2013 22:45 | 0.178396134 | 10/12/2013 23:10 | 0 |
| 10/18/2013 23:00 | 0.181227818 | 10/12/2013 23:20 | 0 |
| 10/18/2013 23:15 | 0.155742656 | 10/12/2013 23:30 | 0 |
| 10/18/2013 23:30 | 0.181227818 | 10/12/2013 23:40 | 0 |
| 10/18/2013 23:45 | 0.172732764 | 10/12/2013 23:50 | 0 |
| 10/19/2013 0:00  | 0.16990108  | 10/13/2013 0:00  | 0 |
| 10/19/2013 0:15  | 0.155742656 | 10/13/2013 0:10  | 0 |
| 10/19/2013 0:30  | 0.155742656 | 10/13/2013 0:20  | 0 |
| 10/19/2013 0:45  | 0.16990108  | 10/13/2013 0:30  | 0 |
| 10/19/2013 1:00  | 0.161406026 | 10/13/2013 0:40  | 0 |
| 10/19/2013 1:15  | 0.155742656 | 10/13/2013 0:50  | 0 |
| 10/19/2013 1:30  | 0.152910972 | 10/13/2013 1:00  | 0 |
| 10/19/2013 1:45  | 0.16423771  | 10/13/2013 1:10  | 0 |
| 10/19/2013 2:00  | 0.155742656 | 10/13/2013 1:20  | 0 |
| 10/19/2013 2:15  | 0.144415918 | 10/13/2013 1:30  | 0 |
| 10/19/2013 2:30  | 0.141584233 | 10/13/2013 1:40  | 0 |
| 10/19/2013 2:45  | 0.141584233 | 10/13/2013 1:50  | 0 |

|                  |             |                 |   |
|------------------|-------------|-----------------|---|
| 10/19/2013 3:00  | 0.144415918 | 10/13/2013 2:00 | 0 |
| 10/19/2013 3:15  | 0.144415918 | 10/13/2013 2:10 | 0 |
| 10/19/2013 3:30  | 0.133089179 | 10/13/2013 2:20 | 0 |
| 10/19/2013 3:45  | 0.133089179 | 10/13/2013 2:30 | 0 |
| 10/19/2013 4:00  | 0.138752548 | 10/13/2013 2:40 | 0 |
| 10/19/2013 4:15  | 0.130257494 | 10/13/2013 2:50 | 0 |
| 10/19/2013 4:30  | 0.124594125 | 10/13/2013 3:00 | 0 |
| 10/19/2013 4:45  | 0.130257494 | 10/13/2013 3:10 | 0 |
| 10/19/2013 5:00  | 0.133089179 | 10/13/2013 3:20 | 0 |
| 10/19/2013 5:15  | 0.12742581  | 10/13/2013 3:30 | 0 |
| 10/19/2013 5:30  | 0.130257494 | 10/13/2013 3:40 | 0 |
| 10/19/2013 5:45  | 0.12176244  | 10/13/2013 3:50 | 0 |
| 10/19/2013 6:00  | 0.141584233 | 10/13/2013 4:00 | 0 |
| 10/19/2013 6:15  | 0.130257494 | 10/13/2013 4:10 | 0 |
| 10/19/2013 6:30  | 0.124594125 | 10/13/2013 4:20 | 0 |
| 10/19/2013 6:45  | 0.124594125 | 10/13/2013 4:30 | 0 |
| 10/19/2013 7:15  | 0.133089179 | 10/13/2013 4:40 | 0 |
| 10/19/2013 7:30  | 0.138752548 | 10/13/2013 4:50 | 0 |
| 10/19/2013 7:45  | 0.133089179 | 10/13/2013 5:00 | 0 |
| 10/19/2013 8:00  | 0.141584233 | 10/13/2013 5:10 | 0 |
| 10/19/2013 8:15  | 0.144415918 | 10/13/2013 5:20 | 0 |
| 10/19/2013 8:30  | 0.150079287 | 10/13/2013 5:30 | 0 |
| 10/19/2013 8:45  | 0.150079287 | 10/13/2013 5:40 | 0 |
| 10/19/2013 9:00  | 0.161406026 | 10/13/2013 5:50 | 0 |
| 10/19/2013 9:15  | 0.155742656 | 10/13/2013 6:00 | 0 |
| 10/19/2013 9:30  | 0.155742656 | 10/13/2013 6:10 | 0 |
| 10/19/2013 9:45  | 0.161406026 | 10/13/2013 6:20 | 0 |
| 10/19/2013 10:00 | 0.16423771  | 10/13/2013 6:30 | 0 |
| 10/19/2013 10:15 | 0.155742656 | 10/13/2013 6:40 | 0 |
| 10/19/2013 10:30 | 0.178396134 | 10/13/2013 6:50 | 0 |
| 10/19/2013 10:45 | 0.186891188 | 10/13/2013 7:00 | 0 |
| 10/19/2013 11:00 | 0.186891188 | 10/13/2013 7:10 | 0 |
| 10/19/2013 11:15 | 0.195386242 | 10/13/2013 7:20 | 0 |
| 10/19/2013 11:30 | 0.189722872 | 10/13/2013 7:30 | 0 |
| 10/19/2013 11:45 | 0.203881296 | 10/13/2013 7:40 | 0 |
| 10/19/2013 12:00 | 0.203881296 | 10/13/2013 7:50 | 0 |
| 10/19/2013 12:15 | 0.201049611 | 10/13/2013 8:00 | 0 |
| 10/19/2013 12:30 | 0.195386242 | 10/13/2013 8:10 | 0 |
| 10/19/2013 12:45 | 0.203881296 | 10/13/2013 8:20 | 0 |
| 10/19/2013 13:00 | 0.218039719 | 10/13/2013 8:30 | 0 |
| 10/19/2013 13:15 | 0.215208034 | 10/13/2013 8:40 | 0 |
| 10/19/2013 13:30 | 0.203881296 | 10/13/2013 8:50 | 0 |
| 10/19/2013 13:45 | 0.209544665 | 10/13/2013 9:00 | 0 |
| 10/19/2013 14:00 | 0.201049611 | 10/13/2013 9:10 | 0 |
| 10/19/2013 14:15 | 0.203881296 | 10/13/2013 9:20 | 0 |
| 10/19/2013 14:30 | 0.189722872 | 10/13/2013 9:30 | 0 |
| 10/19/2013 14:45 | 0.201049611 | 10/13/2013 9:40 | 0 |

|                  |             |                  |   |
|------------------|-------------|------------------|---|
| 10/19/2013 15:00 | 0.195386242 | 10/13/2013 9:50  | 0 |
| 10/19/2013 15:15 | 0.189722872 | 10/13/2013 10:00 | 0 |
| 10/19/2013 15:30 | 0.201049611 | 10/13/2013 10:10 | 0 |
| 10/19/2013 15:45 | 0.209544665 | 10/13/2013 10:20 | 0 |
| 10/19/2013 16:00 | 0.195386242 | 10/13/2013 10:30 | 0 |
| 10/19/2013 16:15 | 0.195386242 | 10/13/2013 10:40 | 0 |
| 10/19/2013 16:30 | 0.181227818 | 10/13/2013 10:50 | 0 |
| 10/19/2013 16:45 | 0.181227818 | 10/13/2013 11:00 | 0 |
| 10/19/2013 17:00 | 0.186891188 | 10/13/2013 11:10 | 0 |
| 10/19/2013 17:15 | 0.16423771  | 10/13/2013 11:20 | 0 |
| 10/19/2013 17:30 | 0.181227818 | 10/13/2013 11:30 | 0 |
| 10/19/2013 17:45 | 0.189722872 | 10/13/2013 11:40 | 0 |
| 10/19/2013 18:00 | 0.189722872 | 10/13/2013 11:50 | 0 |
| 10/19/2013 18:15 | 0.16423771  | 10/13/2013 12:00 | 0 |
| 10/19/2013 18:30 | 0.181227818 | 10/13/2013 12:10 | 0 |
| 10/19/2013 18:45 | 0.178396134 | 10/13/2013 12:20 | 0 |
| 10/19/2013 19:00 | 0.181227818 | 10/13/2013 12:30 | 0 |
| 10/19/2013 19:15 | 0.172732764 | 10/13/2013 12:40 | 0 |
| 10/19/2013 19:30 | 0.181227818 | 10/13/2013 12:50 | 0 |
| 10/19/2013 19:45 | 0.16990108  | 10/13/2013 13:00 | 0 |
| 10/19/2013 20:00 | 0.178396134 | 10/13/2013 13:10 | 0 |
| 10/19/2013 20:15 | 0.181227818 | 10/13/2013 13:20 | 0 |
| 10/19/2013 20:30 | 0.178396134 | 10/13/2013 13:30 | 0 |
| 10/19/2013 20:45 | 0.178396134 | 10/13/2013 13:40 | 0 |
| 10/19/2013 21:00 | 0.178396134 | 10/13/2013 13:50 | 0 |
| 10/19/2013 21:15 | 0.181227818 | 10/13/2013 14:00 | 0 |
| 10/19/2013 21:30 | 0.178396134 | 10/13/2013 14:10 | 0 |
| 10/19/2013 21:45 | 0.178396134 | 10/13/2013 14:20 | 0 |
| 10/19/2013 22:00 | 0.178396134 | 10/13/2013 14:30 | 0 |
| 10/19/2013 22:15 | 0.178396134 | 10/13/2013 14:40 | 0 |
| 10/19/2013 22:30 | 0.181227818 | 10/13/2013 14:50 | 0 |
| 10/19/2013 22:45 | 0.181227818 | 10/13/2013 15:00 | 0 |
| 10/19/2013 23:00 | 0.181227818 | 10/13/2013 15:10 | 0 |
| 10/19/2013 23:15 | 0.172732764 | 10/13/2013 15:20 | 0 |
| 10/19/2013 23:45 | 0.195386242 | 10/13/2013 15:30 | 0 |
| 10/20/2013 0:00  | 0.201049611 | 10/13/2013 15:40 | 0 |
| 10/20/2013 0:15  | 0.16990108  | 10/13/2013 15:50 | 0 |
| 10/20/2013 0:30  | 0.16990108  | 10/13/2013 16:00 | 0 |
| 10/20/2013 0:45  | 0.178396134 | 10/13/2013 16:10 | 0 |
| 10/20/2013 1:00  | 0.16990108  | 10/13/2013 16:20 | 0 |
| 10/20/2013 1:30  | 0.16423771  | 10/13/2013 16:30 | 0 |
| 10/20/2013 1:45  | 0.161406026 | 10/13/2013 16:40 | 0 |
| 10/20/2013 2:00  | 0.178396134 | 10/13/2013 16:50 | 0 |
| 10/20/2013 2:15  | 0.172732764 | 10/13/2013 17:00 | 0 |
| 10/20/2013 2:30  | 0.152910972 | 10/13/2013 17:10 | 0 |
| 10/20/2013 2:45  | 0.161406026 | 10/13/2013 17:20 | 0 |
| 10/20/2013 3:00  | 0.16990108  | 10/13/2013 17:30 | 0 |

|                  |             |                  |   |
|------------------|-------------|------------------|---|
| 10/20/2013 3:15  | 0.152910972 | 10/13/2013 17:40 | 0 |
| 10/20/2013 3:30  | 0.150079287 | 10/13/2013 17:50 | 0 |
| 10/20/2013 3:45  | 0.16990108  | 10/13/2013 18:00 | 0 |
| 10/20/2013 4:00  | 0.150079287 | 10/13/2013 18:10 | 0 |
| 10/20/2013 4:15  | 0.16423771  | 10/13/2013 18:20 | 0 |
| 10/20/2013 4:30  | 0.16423771  | 10/13/2013 18:30 | 0 |
| 10/20/2013 4:45  | 0.144415918 | 10/13/2013 18:40 | 0 |
| 10/20/2013 5:00  | 0.152910972 | 10/13/2013 18:50 | 0 |
| 10/20/2013 5:15  | 0.155742656 | 10/13/2013 19:00 | 0 |
| 10/20/2013 5:30  | 0.161406026 | 10/13/2013 19:10 | 0 |
| 10/20/2013 5:45  | 0.155742656 | 10/13/2013 19:20 | 0 |
| 10/20/2013 6:00  | 0.150079287 | 10/13/2013 19:30 | 0 |
| 10/20/2013 6:15  | 0.152910972 | 10/13/2013 19:40 | 0 |
| 10/20/2013 6:30  | 0.144415918 | 10/13/2013 19:50 | 0 |
| 10/20/2013 6:45  | 0.150079287 | 10/13/2013 20:00 | 0 |
| 10/20/2013 7:00  | 0.141584233 | 10/13/2013 20:10 | 0 |
| 10/20/2013 7:15  | 0.150079287 | 10/13/2013 20:20 | 0 |
| 10/20/2013 7:30  | 0.152910972 | 10/13/2013 20:30 | 0 |
| 10/20/2013 7:45  | 0.144415918 | 10/13/2013 20:40 | 0 |
| 10/20/2013 8:00  | 0.144415918 | 10/13/2013 20:50 | 0 |
| 10/20/2013 8:15  | 0.155742656 | 10/13/2013 21:00 | 0 |
| 10/20/2013 8:30  | 0.155742656 | 10/13/2013 21:10 | 0 |
| 10/20/2013 8:45  | 0.155742656 | 10/13/2013 21:20 | 0 |
| 10/20/2013 9:00  | 0.141584233 | 10/13/2013 21:30 | 0 |
| 10/20/2013 9:15  | 0.150079287 | 10/13/2013 21:40 | 0 |
| 10/20/2013 9:30  | 0.138752548 | 10/13/2013 21:50 | 0 |
| 10/20/2013 9:45  | 0.144415918 | 10/13/2013 22:00 | 0 |
| 10/20/2013 10:00 | 0.152910972 | 10/13/2013 22:10 | 0 |
| 10/20/2013 10:15 | 0.16990108  | 10/13/2013 22:20 | 0 |
| 10/20/2013 10:30 | 0.152910972 | 10/13/2013 22:30 | 0 |
| 10/20/2013 10:45 | 0.16990108  | 10/13/2013 22:40 | 0 |
| 10/20/2013 11:00 | 0.161406026 | 10/13/2013 22:50 | 0 |
| 10/20/2013 11:15 | 0.186891188 | 10/13/2013 23:00 | 0 |
| 10/20/2013 11:30 | 0.172732764 | 10/13/2013 23:10 | 0 |
| 10/20/2013 11:45 | 0.186891188 | 10/13/2013 23:20 | 0 |
| 10/20/2013 12:00 | 0.178396134 | 10/13/2013 23:30 | 0 |
| 10/20/2013 12:15 | 0.178396134 | 10/13/2013 23:40 | 0 |
| 10/20/2013 12:30 | 0.181227818 | 10/13/2013 23:50 | 0 |
| 10/20/2013 12:45 | 0.201049611 | 10/14/2013 0:00  | 0 |
| 10/20/2013 13:00 | 0.189722872 | 10/14/2013 0:10  | 0 |
| 10/20/2013 13:15 | 0.186891188 | 10/14/2013 0:20  | 0 |
| 10/20/2013 13:30 | 0.186891188 | 10/14/2013 0:30  | 0 |
| 10/20/2013 13:45 | 0.189722872 | 10/14/2013 0:40  | 0 |
| 10/20/2013 14:00 | 0.195386242 | 10/14/2013 0:50  | 0 |
| 10/20/2013 14:15 | 0.195386242 | 10/14/2013 1:00  | 0 |
| 10/20/2013 14:30 | 0.201049611 | 10/14/2013 1:10  | 0 |
| 10/20/2013 14:45 | 0.203881296 | 10/14/2013 1:20  | 0 |



|                  |             |                 |   |
|------------------|-------------|-----------------|---|
| 10/20/2013 15:00 | 0.186891188 | 10/14/2013 1:30 | 0 |
| 10/20/2013 15:15 | 0.186891188 | 10/14/2013 1:40 | 0 |
| 10/20/2013 15:30 | 0.189722872 | 10/14/2013 1:50 | 0 |
| 10/20/2013 15:45 | 0.186891188 | 10/14/2013 2:00 | 0 |
| 10/20/2013 16:00 | 0.203881296 | 10/14/2013 2:10 | 0 |
| 10/20/2013 16:15 | 0.181227818 | 10/14/2013 2:20 | 0 |
| 10/20/2013 16:30 | 0.178396134 | 10/14/2013 2:30 | 0 |
| 10/20/2013 16:45 | 0.186891188 | 10/14/2013 2:40 | 0 |
| 10/20/2013 17:00 | 0.181227818 | 10/14/2013 2:50 | 0 |
| 10/20/2013 17:15 | 0.186891188 | 10/14/2013 3:00 | 0 |
| 10/20/2013 17:30 | 0.186891188 | 10/14/2013 3:10 | 0 |
| 10/20/2013 17:45 | 0.186891188 | 10/14/2013 3:20 | 0 |
| 10/20/2013 18:00 | 0.186891188 | 10/14/2013 3:30 | 0 |
| 10/20/2013 18:15 | 0.181227818 | 10/14/2013 3:40 | 0 |
| 10/20/2013 18:30 | 0.172732764 | 10/14/2013 3:50 | 0 |
| 10/20/2013 18:45 | 0.172732764 | 10/14/2013 4:00 | 0 |
| 10/20/2013 19:00 | 0.181227818 | 10/14/2013 4:10 | 0 |
| 10/20/2013 19:15 | 0.181227818 | 10/14/2013 4:20 | 0 |
| 10/20/2013 19:30 | 0.172732764 | 10/14/2013 4:30 | 0 |
| 10/20/2013 19:45 | 0.16990108  | 10/14/2013 4:40 | 0 |
| 10/20/2013 20:00 | 0.178396134 | 10/14/2013 4:50 | 0 |
| 10/20/2013 20:15 | 0.178396134 | 10/14/2013 5:00 | 0 |
| 10/20/2013 20:30 | 0.195386242 | 10/14/2013 5:10 | 0 |
| 10/20/2013 20:45 | 0.172732764 | 10/14/2013 5:20 | 0 |
| 10/20/2013 21:00 | 0.189722872 | 10/14/2013 5:30 | 0 |
| 10/20/2013 21:15 | 0.178396134 | 10/14/2013 5:40 | 0 |
| 10/20/2013 21:30 | 0.195386242 | 10/14/2013 5:50 | 0 |
| 10/20/2013 21:45 | 0.186891188 | 10/14/2013 6:00 | 0 |
| 10/20/2013 22:00 | 0.186891188 | 10/14/2013 6:10 | 0 |
| 10/20/2013 22:15 | 0.203881296 | 10/14/2013 6:20 | 0 |
| 10/20/2013 22:30 | 0.181227818 | 10/14/2013 6:30 | 0 |
| 10/20/2013 22:45 | 0.201049611 | 10/14/2013 6:40 | 0 |
| 10/20/2013 23:00 | 0.186891188 | 10/14/2013 6:50 | 0 |
| 10/20/2013 23:15 | 0.189722872 | 10/14/2013 7:00 | 0 |
| 10/20/2013 23:30 | 0.189722872 | 10/14/2013 7:10 | 0 |
| 10/20/2013 23:45 | 0.181227818 | 10/14/2013 7:20 | 0 |
| 10/21/2013 0:00  | 0.178396134 | 10/14/2013 7:30 | 0 |
| 10/21/2013 0:15  | 0.172732764 | 10/14/2013 7:40 | 0 |
| 10/21/2013 0:30  | 0.16423771  | 10/14/2013 7:50 | 0 |
| 10/21/2013 0:45  | 0.172732764 | 10/14/2013 8:00 | 0 |
| 10/21/2013 1:00  | 0.16423771  | 10/14/2013 8:10 | 0 |
| 10/21/2013 1:15  | 0.16423771  | 10/14/2013 8:20 | 0 |
| 10/21/2013 1:30  | 0.150079287 | 10/14/2013 8:30 | 0 |
| 10/21/2013 1:45  | 0.155742656 | 10/14/2013 8:40 | 0 |
| 10/21/2013 2:00  | 0.150079287 | 10/14/2013 8:50 | 0 |
| 10/21/2013 2:15  | 0.155742656 | 10/14/2013 9:00 | 0 |
| 10/21/2013 2:30  | 0.144415918 | 10/14/2013 9:10 | 0 |

|                  |             |                  |   |
|------------------|-------------|------------------|---|
| 10/21/2013 2:45  | 0.130257494 | 10/14/2013 9:40  | 0 |
| 10/21/2013 3:00  | 0.133089179 | 10/14/2013 9:50  | 0 |
| 10/21/2013 3:15  | 0.144415918 | 10/14/2013 10:00 | 0 |
| 10/21/2013 3:30  | 0.144415918 | 10/14/2013 10:10 | 0 |
| 10/21/2013 3:45  | 0.141584233 | 10/14/2013 10:20 | 0 |
| 10/21/2013 4:00  | 0.141584233 | 10/14/2013 10:40 | 0 |
| 10/21/2013 4:15  | 0.141584233 | 10/14/2013 10:50 | 0 |
| 10/21/2013 4:30  | 0.141584233 | 10/14/2013 11:20 | 0 |
| 10/21/2013 4:45  | 0.144415918 | 10/14/2013 11:30 | 0 |
| 10/21/2013 5:00  | 0.141584233 | 10/14/2013 11:40 | 0 |
| 10/21/2013 5:15  | 0.138752548 | 10/14/2013 11:50 | 0 |
| 10/21/2013 5:30  | 0.124594125 | 10/14/2013 12:00 | 0 |
| 10/21/2013 5:45  | 0.12176244  | 10/14/2013 12:10 | 0 |
| 10/21/2013 6:00  | 0.124594125 | 10/14/2013 12:20 | 0 |
| 10/21/2013 6:15  | 0.12742581  | 10/14/2013 12:30 | 0 |
| 10/21/2013 6:30  | 0.130257494 | 10/14/2013 12:50 | 0 |
| 10/21/2013 6:45  | 0.133089179 | 10/14/2013 13:00 | 0 |
| 10/21/2013 7:00  | 0.133089179 | 10/14/2013 13:10 | 0 |
| 10/21/2013 7:15  | 0.130257494 | 10/14/2013 13:30 | 0 |
| 10/21/2013 7:30  | 0.141584233 | 10/14/2013 13:40 | 0 |
| 10/21/2013 7:45  | 0.133089179 | 10/14/2013 13:50 | 0 |
| 10/21/2013 8:00  | 0.144415918 | 10/14/2013 14:00 | 0 |
| 10/21/2013 8:15  | 0.155742656 | 10/14/2013 14:10 | 0 |
| 10/21/2013 8:30  | 0.16423771  | 10/14/2013 14:20 | 0 |
| 10/21/2013 8:45  | 0.16423771  | 10/14/2013 14:30 | 0 |
| 10/21/2013 9:00  | 0.178396134 | 10/14/2013 14:40 | 0 |
| 10/21/2013 9:15  | 0.172732764 | 10/14/2013 14:50 | 0 |
| 10/21/2013 9:30  | 0.178396134 | 10/14/2013 15:00 | 0 |
| 10/21/2013 9:45  | 0.195386242 | 10/14/2013 15:10 | 0 |
| 10/21/2013 10:00 | 0.181227818 | 10/14/2013 15:20 | 0 |
| 10/21/2013 10:15 | 0.181227818 | 10/14/2013 15:30 | 0 |
| 10/21/2013 10:30 | 0.201049611 | 10/14/2013 15:40 | 0 |
| 10/21/2013 10:45 | 0.195386242 | 10/14/2013 15:50 | 0 |
| 10/21/2013 11:00 | 0.201049611 | 10/14/2013 16:00 | 0 |
| 10/21/2013 11:15 | 0.201049611 | 10/14/2013 16:10 | 0 |
| 10/21/2013 11:30 | 0.195386242 | 10/14/2013 17:10 | 0 |
| 10/21/2013 11:45 | 0.189722872 | 10/14/2013 17:20 | 0 |
| 10/21/2013 12:00 | 0.186891188 | 10/14/2013 17:30 | 0 |
| 10/21/2013 12:15 | 0.178396134 | 10/14/2013 17:40 | 0 |
| 10/21/2013 12:30 | 0.186891188 | 10/14/2013 17:50 | 0 |
| 10/21/2013 12:45 | 0.181227818 | 10/14/2013 18:00 | 0 |
| 10/21/2013 13:00 | 0.16990108  | 10/14/2013 18:10 | 0 |
| 10/21/2013 13:15 | 0.16990108  | 10/14/2013 18:20 | 0 |
| 10/21/2013 13:30 | 0.16990108  | 10/14/2013 18:30 | 0 |
| 10/21/2013 13:45 | 0.172732764 | 10/14/2013 18:40 | 0 |
| 10/21/2013 14:00 | 0.172732764 | 10/14/2013 18:50 | 0 |
| 10/21/2013 14:15 | 0.181227818 | 10/14/2013 19:00 | 0 |

|                  |             |                  |        |
|------------------|-------------|------------------|--------|
| 10/21/2013 14:30 | 0.178396134 | 10/14/2013 19:10 | 0      |
| 10/21/2013 14:45 | 0.178396134 | 10/14/2013 19:20 | 0      |
| 10/21/2013 15:00 | 0.178396134 | 10/14/2013 19:30 | 0      |
| 10/21/2013 15:15 | 0.16990108  | 10/14/2013 19:40 | 0      |
| 10/21/2013 15:30 | 0.16423771  | 10/14/2013 19:50 | 0      |
| 10/21/2013 15:45 | 0.161406026 | 10/14/2013 20:00 | 0      |
| 10/21/2013 16:00 | 0.16990108  | 10/14/2013 20:10 | 0.0254 |
| 10/21/2013 16:15 | 0.161406026 | 10/14/2013 20:20 | 0.0254 |
| 10/21/2013 16:30 | 0.16990108  | 10/14/2013 20:30 | 0.0254 |
| 10/21/2013 16:45 | 0.178396134 | 10/14/2013 20:40 | 0.0254 |
| 10/21/2013 17:00 | 0.161406026 | 10/14/2013 20:50 | 0.0254 |
| 10/21/2013 17:15 | 0.161406026 | 10/14/2013 21:00 | 0.0254 |
| 10/21/2013 17:30 | 0.16990108  | 10/14/2013 21:10 | 0.0254 |
| 10/21/2013 17:45 | 0.155742656 | 10/14/2013 21:20 | 0.0254 |
| 10/21/2013 18:00 | 0.16423771  | 10/14/2013 21:30 | 0.0254 |
| 10/21/2013 18:15 | 0.155742656 | 10/14/2013 21:40 | 0.0254 |
| 10/21/2013 18:30 | 0.155742656 | 10/14/2013 21:50 | 0.0254 |
| 10/21/2013 18:45 | 0.16990108  | 10/14/2013 22:00 | 0.0508 |
| 10/21/2013 19:00 | 0.172732764 | 10/14/2013 22:10 | 0.0508 |
| 10/21/2013 19:15 | 0.16423771  | 10/14/2013 22:20 | 0.0508 |
| 10/21/2013 19:30 | 0.16423771  | 10/14/2013 22:30 | 0.0508 |
| 10/21/2013 19:45 | 0.178396134 | 10/14/2013 22:40 | 0.0508 |
| 10/21/2013 20:00 | 0.178396134 | 10/14/2013 22:50 | 0.0508 |
| 10/21/2013 20:15 | 0.16423771  | 10/14/2013 23:00 | 0.0508 |
| 10/21/2013 20:30 | 0.181227818 | 10/14/2013 23:10 | 0.0508 |
| 10/21/2013 20:45 | 0.181227818 | 10/14/2013 23:20 | 0.0508 |
| 10/21/2013 21:00 | 0.186891188 | 10/14/2013 23:30 | 0.0508 |
| 10/21/2013 21:15 | 0.178396134 | 10/14/2013 23:40 | 0.0508 |
| 10/21/2013 21:30 | 0.186891188 | 10/14/2013 23:50 | 0.0508 |
| 10/21/2013 21:45 | 0.178396134 | 10/15/2013 0:00  | 0.0508 |
| 10/21/2013 22:00 | 0.189722872 | 10/15/2013 0:10  | 0.0254 |
| 10/21/2013 22:15 | 0.189722872 | 10/15/2013 0:20  | 0.0762 |
| 10/21/2013 22:30 | 0.181227818 | 10/15/2013 0:30  | 0.254  |
| 10/21/2013 22:45 | 0.195386242 | 10/15/2013 0:40  | 0.4318 |
| 10/21/2013 23:00 | 0.181227818 | 10/15/2013 0:50  | 0.6096 |
| 10/21/2013 23:15 | 0.181227818 | 10/15/2013 1:00  | 0.6604 |
| 10/21/2013 23:30 | 0.178396134 | 10/15/2013 1:10  | 0.6858 |
| 10/21/2013 23:45 | 0.178396134 | 10/15/2013 1:20  | 0.6858 |
| 10/22/2013 0:00  | 0.186891188 | 10/15/2013 1:30  | 0.6858 |
| 10/22/2013 0:15  | 0.181227818 | 10/15/2013 1:40  | 0.7112 |
| 10/22/2013 0:30  | 0.181227818 | 10/15/2013 1:50  | 0.7112 |
| 10/22/2013 0:45  | 0.16990108  | 10/15/2013 2:00  | 0.7112 |
| 10/22/2013 1:00  | 0.172732764 | 10/15/2013 2:10  | 0.7112 |
| 10/22/2013 1:15  | 0.178396134 | 10/15/2013 2:20  | 0.7112 |
| 10/22/2013 1:30  | 0.152910972 | 10/15/2013 2:30  | 0.7112 |
| 10/22/2013 1:45  | 0.16423771  | 10/15/2013 2:40  | 0.7112 |
| 10/22/2013 2:00  | 0.16423771  | 10/15/2013 2:50  | 0.7112 |

|                  |             |                  |        |
|------------------|-------------|------------------|--------|
| 10/22/2013 2:15  | 0.152910972 | 10/15/2013 3:00  | 0.7112 |
| 10/22/2013 2:30  | 0.144415918 | 10/15/2013 3:10  | 0.7112 |
| 10/22/2013 2:45  | 0.138752548 | 10/15/2013 3:20  | 0.7112 |
| 10/22/2013 3:00  | 0.150079287 | 10/15/2013 3:30  | 0.7112 |
| 10/22/2013 3:15  | 0.133089179 | 10/15/2013 3:40  | 0.7112 |
| 10/22/2013 3:30  | 0.144415918 | 10/15/2013 3:50  | 0.7112 |
| 10/22/2013 3:45  | 0.12742581  | 10/15/2013 4:00  | 0.7112 |
| 10/22/2013 4:00  | 0.12742581  | 10/15/2013 4:10  | 0.7112 |
| 10/22/2013 4:15  | 0.12742581  | 10/15/2013 4:20  | 0.7112 |
| 10/22/2013 4:30  | 0.130257494 | 10/15/2013 4:30  | 0.7112 |
| 10/22/2013 4:45  | 0.124594125 | 10/15/2013 4:40  | 0.7112 |
| 10/22/2013 5:00  | 0.124594125 | 10/15/2013 4:50  | 0.7112 |
| 10/22/2013 5:15  | 0.133089179 | 10/15/2013 5:00  | 0.7112 |
| 10/22/2013 5:30  | 0.130257494 | 10/15/2013 5:10  | 0.7112 |
| 10/22/2013 5:45  | 0.130257494 | 10/15/2013 5:20  | 0.7112 |
| 10/22/2013 6:00  | 0.12742581  | 10/15/2013 5:30  | 0.7112 |
| 10/22/2013 6:15  | 0.138752548 | 10/15/2013 5:40  | 0.7112 |
| 10/22/2013 6:30  | 0.138752548 | 10/15/2013 5:50  | 0.7112 |
| 10/22/2013 6:45  | 0.133089179 | 10/15/2013 6:00  | 0.7112 |
| 10/22/2013 7:00  | 0.133089179 | 10/15/2013 6:10  | 0.7112 |
| 10/22/2013 7:15  | 0.141584233 | 10/15/2013 6:20  | 0.7112 |
| 10/22/2013 7:30  | 0.138752548 | 10/15/2013 6:30  | 0.7112 |
| 10/22/2013 7:45  | 0.152910972 | 10/15/2013 6:40  | 0.7112 |
| 10/22/2013 8:00  | 0.141584233 | 10/15/2013 6:50  | 0.7112 |
| 10/22/2013 8:15  | 0.155742656 | 10/15/2013 7:00  | 0.7112 |
| 10/22/2013 8:30  | 0.150079287 | 10/15/2013 7:10  | 0.7112 |
| 10/22/2013 8:45  | 0.178396134 | 10/15/2013 7:20  | 0.7112 |
| 10/22/2013 9:00  | 0.16423771  | 10/15/2013 7:30  | 0.7112 |
| 10/22/2013 9:15  | 0.189722872 | 10/15/2013 7:40  | 0.7112 |
| 10/22/2013 9:30  | 0.178396134 | 10/15/2013 7:50  | 0.7112 |
| 10/22/2013 9:45  | 0.181227818 | 10/15/2013 8:00  | 0.7112 |
| 10/22/2013 10:00 | 0.201049611 | 10/15/2013 8:10  | 0.7112 |
| 10/22/2013 10:15 | 0.181227818 | 10/15/2013 8:20  | 0.7112 |
| 10/22/2013 10:30 | 0.203881296 | 10/15/2013 8:30  | 0.7112 |
| 10/22/2013 10:45 | 0.172732764 | 10/15/2013 8:40  | 0.7112 |
| 10/22/2013 11:00 | 0.195386242 | 10/15/2013 8:50  | 0.7112 |
| 10/22/2013 11:15 | 0.172732764 | 10/15/2013 9:00  | 0.7112 |
| 10/22/2013 11:30 | 0.181227818 | 10/15/2013 9:10  | 0.7112 |
| 10/22/2013 11:45 | 0.178396134 | 10/15/2013 9:20  | 0.7112 |
| 10/22/2013 12:00 | 0.16423771  | 10/15/2013 9:30  | 0.7112 |
| 10/22/2013 12:15 | 0.189722872 | 10/15/2013 9:40  | 0.7112 |
| 10/22/2013 12:30 | 0.195386242 | 10/15/2013 9:50  | 0.7112 |
| 10/22/2013 12:45 | 0.16423771  | 10/15/2013 10:00 | 0.7112 |
| 10/22/2013 13:00 | 0.186891188 | 10/15/2013 10:10 | 0.7112 |
| 10/22/2013 13:15 | 0.16990108  | 10/15/2013 10:20 | 0.7112 |
| 10/22/2013 13:30 | 0.181227818 | 10/15/2013 10:30 | 0.7112 |
| 10/22/2013 13:45 | 0.178396134 | 10/15/2013 10:40 | 0.7112 |

|                  |             |                  |        |
|------------------|-------------|------------------|--------|
| 10/22/2013 14:00 | 0.172732764 | 10/15/2013 10:50 | 0.7112 |
| 10/22/2013 14:15 | 0.172732764 | 10/15/2013 11:00 | 0.7112 |
| 10/22/2013 14:30 | 0.178396134 | 10/15/2013 11:10 | 0.7112 |
| 10/22/2013 14:45 | 0.181227818 | 10/15/2013 11:20 | 0.7112 |
| 10/22/2013 15:00 | 0.189722872 | 10/15/2013 11:30 | 0.7112 |
| 10/22/2013 15:15 | 0.189722872 | 10/15/2013 11:40 | 0.7112 |
| 10/22/2013 15:30 | 0.189722872 | 10/15/2013 11:50 | 0.7112 |
| 10/22/2013 15:45 | 0.186891188 | 10/15/2013 12:00 | 0.7112 |
| 10/22/2013 16:00 | 0.186891188 | 10/15/2013 12:10 | 0.7112 |
| 10/22/2013 16:15 | 0.186891188 | 10/15/2013 12:20 | 0.7112 |
| 10/22/2013 16:30 | 0.186891188 | 10/15/2013 12:30 | 0.7112 |
| 10/22/2013 16:45 | 0.186891188 | 10/15/2013 12:40 | 0.7112 |
| 10/22/2013 17:00 | 0.186891188 | 10/15/2013 12:50 | 0.7112 |
| 10/22/2013 17:15 | 0.186891188 | 10/15/2013 13:00 | 0.7112 |
| 10/22/2013 17:30 | 0.181227818 | 10/15/2013 13:10 | 0.7112 |
| 10/22/2013 17:45 | 0.186891188 | 10/15/2013 13:20 | 0.7112 |
| 10/22/2013 18:00 | 0.186891188 | 10/15/2013 13:30 | 0.7112 |
| 10/22/2013 18:15 | 0.189722872 | 10/15/2013 13:40 | 0.7112 |
| 10/22/2013 18:30 | 0.186891188 | 10/15/2013 13:50 | 0.7112 |
| 10/22/2013 18:45 | 0.189722872 | 10/15/2013 14:00 | 0.7112 |
| 10/22/2013 19:00 | 0.195386242 | 10/15/2013 14:10 | 0.7112 |
| 10/22/2013 19:15 | 0.201049611 | 10/15/2013 14:20 | 0.7112 |
| 10/22/2013 19:30 | 0.201049611 | 10/15/2013 14:30 | 0.7112 |
| 10/22/2013 19:45 | 0.203881296 | 10/15/2013 14:40 | 0.7112 |
| 10/22/2013 20:00 | 0.201049611 | 10/15/2013 14:50 | 0.7112 |
| 10/22/2013 20:15 | 0.203881296 | 10/15/2013 15:00 | 0.7112 |
| 10/22/2013 20:30 | 0.209544665 | 10/15/2013 15:10 | 0.7112 |
| 10/22/2013 20:45 | 0.209544665 | 10/15/2013 15:20 | 0.7112 |
| 10/22/2013 21:00 | 0.209544665 | 10/15/2013 15:30 | 0.7112 |
| 10/22/2013 21:15 | 0.215208034 | 10/15/2013 15:40 | 0.7112 |
| 10/22/2013 21:30 | 0.215208034 | 10/15/2013 15:50 | 0.7112 |
| 10/22/2013 21:45 | 0.215208034 | 10/15/2013 16:00 | 0.7112 |
| 10/22/2013 22:00 | 0.218039719 | 10/15/2013 16:10 | 0.7112 |
| 10/22/2013 22:15 | 0.218039719 | 10/15/2013 16:20 | 0.7112 |
| 10/22/2013 22:30 | 0.215208034 | 10/15/2013 16:30 | 0.7112 |
| 10/22/2013 22:45 | 0.215208034 | 10/15/2013 16:40 | 0.7112 |
| 10/22/2013 23:00 | 0.215208034 | 10/15/2013 16:50 | 0.7112 |
| 10/22/2013 23:15 | 0.215208034 | 10/15/2013 17:00 | 0.7112 |
| 10/22/2013 23:30 | 0.215208034 | 10/15/2013 17:10 | 0.7112 |
| 10/22/2013 23:45 | 0.209544665 | 10/15/2013 17:20 | 0.7112 |
| 10/23/2013 0:00  | 0.203881296 | 10/15/2013 17:30 | 0.7112 |
| 10/23/2013 0:15  | 0.203881296 | 10/15/2013 17:40 | 0.7112 |
| 10/23/2013 0:30  | 0.195386242 | 10/15/2013 17:50 | 0.7112 |
| 10/23/2013 0:45  | 0.195386242 | 10/15/2013 18:00 | 0.7112 |
| 10/23/2013 1:00  | 0.189722872 | 10/15/2013 18:10 | 0.7112 |
| 10/23/2013 1:15  | 0.189722872 | 10/15/2013 18:20 | 0.7112 |
| 10/23/2013 1:30  | 0.186891188 | 10/15/2013 18:30 | 0.7112 |

|                  |             |                  |        |
|------------------|-------------|------------------|--------|
| 10/23/2013 1:45  | 0.181227818 | 10/15/2013 18:40 | 0.7112 |
| 10/23/2013 2:00  | 0.181227818 | 10/15/2013 18:50 | 0.7112 |
| 10/23/2013 2:15  | 0.178396134 | 10/15/2013 19:00 | 0.7112 |
| 10/23/2013 2:30  | 0.178396134 | 10/15/2013 19:10 | 0.7112 |
| 10/23/2013 2:45  | 0.172732764 | 10/15/2013 19:20 | 0.7112 |
| 10/23/2013 3:00  | 0.16990108  | 10/15/2013 19:30 | 0.7112 |
| 10/23/2013 3:15  | 0.16423771  | 10/15/2013 19:40 | 0.7112 |
| 10/23/2013 3:30  | 0.16990108  | 10/15/2013 19:50 | 0.7112 |
| 10/23/2013 3:45  | 0.16423771  | 10/15/2013 20:00 | 0.7112 |
| 10/23/2013 4:00  | 0.16423771  | 10/15/2013 20:10 | 0.7112 |
| 10/23/2013 4:15  | 0.16423771  | 10/15/2013 20:20 | 0.7112 |
| 10/23/2013 4:30  | 0.161406026 | 10/15/2013 20:30 | 0.7112 |
| 10/23/2013 4:45  | 0.161406026 | 10/15/2013 20:40 | 0.7112 |
| 10/23/2013 5:00  | 0.161406026 | 10/15/2013 20:50 | 0.7112 |
| 10/23/2013 5:15  | 0.155742656 | 10/15/2013 21:00 | 0.7112 |
| 10/23/2013 5:30  | 0.155742656 | 10/15/2013 21:10 | 0.7112 |
| 10/23/2013 5:45  | 0.155742656 | 10/15/2013 21:20 | 0.7112 |
| 10/23/2013 6:00  | 0.155742656 | 10/15/2013 21:30 | 0.7112 |
| 10/23/2013 6:15  | 0.155742656 | 10/15/2013 21:40 | 0.7112 |
| 10/23/2013 6:30  | 0.155742656 | 10/15/2013 21:50 | 0.7112 |
| 10/23/2013 6:45  | 0.161406026 | 10/15/2013 22:00 | 0.7112 |
| 10/23/2013 7:00  | 0.16423771  | 10/15/2013 22:10 | 0.7112 |
| 10/23/2013 7:15  | 0.16423771  | 10/15/2013 22:20 | 0.7112 |
| 10/23/2013 7:30  | 0.16990108  | 10/15/2013 22:30 | 0.7112 |
| 10/23/2013 7:45  | 0.16990108  | 10/15/2013 22:40 | 0.7112 |
| 10/23/2013 8:00  | 0.178396134 | 10/15/2013 22:50 | 0.7112 |
| 10/23/2013 8:15  | 0.181227818 | 10/15/2013 23:00 | 0.7112 |
| 10/23/2013 8:30  | 0.186891188 | 10/15/2013 23:10 | 0.7112 |
| 10/23/2013 8:45  | 0.195386242 | 10/15/2013 23:20 | 0.7112 |
| 10/23/2013 9:00  | 0.201049611 | 10/15/2013 23:30 | 0.7112 |
| 10/23/2013 9:15  | 0.203881296 | 10/15/2013 23:40 | 0.7112 |
| 10/23/2013 9:30  | 0.209544665 | 10/15/2013 23:50 | 0.7112 |
| 10/23/2013 9:45  | 0.215208034 | 10/16/2013 0:00  | 0.7112 |
| 10/23/2013 10:00 | 0.218039719 | 10/16/2013 0:10  | 0      |
| 10/23/2013 10:15 | 0.218039719 | 10/16/2013 0:20  | 0      |
| 10/23/2013 10:30 | 0.218039719 | 10/16/2013 0:30  | 0      |
| 10/23/2013 10:45 | 0.218039719 | 10/16/2013 0:40  | 0      |
| 10/23/2013 11:00 | 0.218039719 | 10/16/2013 0:50  | 0      |
| 10/23/2013 11:15 | 0.218039719 | 10/16/2013 1:00  | 0      |
| 10/23/2013 11:30 | 0.218039719 | 10/16/2013 1:10  | 0      |
| 10/23/2013 11:45 | 0.209544665 | 10/16/2013 1:20  | 0      |
| 10/23/2013 12:00 | 0.209544665 | 10/16/2013 1:30  | 0      |
| 10/23/2013 12:15 | 0.209544665 | 10/16/2013 1:40  | 0      |
| 10/23/2013 12:30 | 0.209544665 | 10/16/2013 1:50  | 0      |
| 10/23/2013 12:45 | 0.203881296 | 10/16/2013 2:00  | 0      |
| 10/23/2013 13:00 | 0.201049611 | 10/16/2013 2:10  | 0      |
| 10/23/2013 13:15 | 0.201049611 | 10/16/2013 2:20  | 0      |

|                  |             |                  |   |
|------------------|-------------|------------------|---|
| 10/23/2013 13:30 | 0.195386242 | 10/16/2013 2:30  | 0 |
| 10/23/2013 13:45 | 0.195386242 | 10/16/2013 2:40  | 0 |
| 10/23/2013 14:00 | 0.195386242 | 10/16/2013 2:50  | 0 |
| 10/23/2013 14:15 | 0.195386242 | 10/16/2013 3:00  | 0 |
| 10/23/2013 14:30 | 0.195386242 | 10/16/2013 3:10  | 0 |
| 10/23/2013 14:45 | 0.195386242 | 10/16/2013 3:20  | 0 |
| 10/23/2013 15:00 | 0.195386242 | 10/16/2013 3:30  | 0 |
| 10/23/2013 15:15 | 0.189722872 | 10/16/2013 3:40  | 0 |
| 10/23/2013 15:30 | 0.189722872 | 10/16/2013 3:50  | 0 |
| 10/23/2013 15:45 | 0.189722872 | 10/16/2013 4:00  | 0 |
| 10/23/2013 16:00 | 0.189722872 | 10/16/2013 4:10  | 0 |
| 10/23/2013 16:15 | 0.186891188 | 10/16/2013 4:20  | 0 |
| 10/23/2013 16:30 | 0.189722872 | 10/16/2013 4:30  | 0 |
| 10/23/2013 16:45 | 0.186891188 | 10/16/2013 4:40  | 0 |
| 10/23/2013 17:00 | 0.186891188 | 10/16/2013 4:50  | 0 |
| 10/23/2013 17:15 | 0.189722872 | 10/16/2013 5:00  | 0 |
| 10/23/2013 17:30 | 0.189722872 | 10/16/2013 5:10  | 0 |
| 10/23/2013 17:45 | 0.186891188 | 10/16/2013 5:20  | 0 |
| 10/23/2013 18:00 | 0.186891188 | 10/16/2013 5:30  | 0 |
| 10/23/2013 18:15 | 0.186891188 | 10/16/2013 5:40  | 0 |
| 10/23/2013 18:30 | 0.186891188 | 10/16/2013 5:50  | 0 |
| 10/23/2013 18:45 | 0.186891188 | 10/16/2013 6:00  | 0 |
| 10/23/2013 19:00 | 0.186891188 | 10/16/2013 6:10  | 0 |
| 10/23/2013 19:15 | 0.189722872 | 10/16/2013 6:20  | 0 |
| 10/23/2013 19:30 | 0.195386242 | 10/16/2013 6:30  | 0 |
| 10/23/2013 19:45 | 0.201049611 | 10/16/2013 6:40  | 0 |
| 10/23/2013 20:00 | 0.201049611 | 10/16/2013 6:50  | 0 |
| 10/23/2013 20:15 | 0.203881296 | 10/16/2013 7:00  | 0 |
| 10/23/2013 20:30 | 0.203881296 | 10/16/2013 7:10  | 0 |
| 10/23/2013 20:45 | 0.203881296 | 10/16/2013 7:20  | 0 |
| 10/23/2013 21:00 | 0.209544665 | 10/16/2013 7:40  | 0 |
| 10/23/2013 21:15 | 0.209544665 | 10/16/2013 7:50  | 0 |
| 10/23/2013 21:30 | 0.209544665 | 10/16/2013 8:00  | 0 |
| 10/23/2013 21:45 | 0.209544665 | 10/16/2013 8:10  | 0 |
| 10/23/2013 22:00 | 0.209544665 | 10/16/2013 8:20  | 0 |
| 10/23/2013 22:15 | 0.215208034 | 10/16/2013 8:30  | 0 |
| 10/23/2013 22:30 | 0.215208034 | 10/16/2013 8:40  | 0 |
| 10/23/2013 22:45 | 0.215208034 | 10/16/2013 8:50  | 0 |
| 10/23/2013 23:00 | 0.209544665 | 10/16/2013 9:00  | 0 |
| 10/23/2013 23:15 | 0.209544665 | 10/16/2013 9:10  | 0 |
| 10/23/2013 23:30 | 0.209544665 | 10/16/2013 9:20  | 0 |
| 10/23/2013 23:45 | 0.209544665 | 10/16/2013 9:30  | 0 |
| 10/24/2013 0:00  | 0.203881296 | 10/16/2013 9:40  | 0 |
| 10/24/2013 0:15  | 0.201049611 | 10/16/2013 9:50  | 0 |
| 10/24/2013 0:30  | 0.201049611 | 10/16/2013 10:00 | 0 |
| 10/24/2013 0:45  | 0.195386242 | 10/16/2013 10:10 | 0 |
| 10/24/2013 1:00  | 0.189722872 | 10/16/2013 10:20 | 0 |

|                  |             |                  |   |
|------------------|-------------|------------------|---|
| 10/24/2013 1:15  | 0.186891188 | 10/16/2013 10:30 | 0 |
| 10/24/2013 1:30  | 0.186891188 | 10/16/2013 10:40 | 0 |
| 10/24/2013 1:45  | 0.186891188 | 10/16/2013 10:50 | 0 |
| 10/24/2013 2:00  | 0.181227818 | 10/16/2013 11:00 | 0 |
| 10/24/2013 2:15  | 0.172732764 | 10/16/2013 11:10 | 0 |
| 10/24/2013 2:30  | 0.172732764 | 10/16/2013 11:20 | 0 |
| 10/24/2013 2:45  | 0.16990108  | 10/16/2013 11:30 | 0 |
| 10/24/2013 3:00  | 0.16990108  | 10/16/2013 11:40 | 0 |
| 10/24/2013 3:15  | 0.16423771  | 10/16/2013 11:50 | 0 |
| 10/24/2013 3:30  | 0.16423771  | 10/16/2013 12:00 | 0 |
| 10/24/2013 3:45  | 0.16423771  | 10/16/2013 12:10 | 0 |
| 10/24/2013 4:00  | 0.16423771  | 10/16/2013 12:20 | 0 |
| 10/24/2013 4:15  | 0.161406026 | 10/16/2013 12:30 | 0 |
| 10/24/2013 4:30  | 0.161406026 | 10/16/2013 13:20 | 0 |
| 10/24/2013 4:45  | 0.161406026 | 10/16/2013 13:30 | 0 |
| 10/24/2013 5:00  | 0.155742656 | 10/16/2013 13:40 | 0 |
| 10/24/2013 5:15  | 0.152910972 | 10/16/2013 13:50 | 0 |
| 10/24/2013 5:30  | 0.152910972 | 10/16/2013 14:00 | 0 |
| 10/24/2013 5:45  | 0.152910972 | 10/16/2013 14:20 | 0 |
| 10/24/2013 6:00  | 0.152910972 | 10/16/2013 14:30 | 0 |
| 10/24/2013 6:15  | 0.152910972 | 10/16/2013 14:40 | 0 |
| 10/24/2013 6:30  | 0.152910972 | 10/16/2013 15:10 | 0 |
| 10/24/2013 6:45  | 0.155742656 | 10/16/2013 15:20 | 0 |
| 10/24/2013 7:00  | 0.155742656 | 10/16/2013 15:30 | 0 |
| 10/24/2013 7:15  | 0.155742656 | 10/16/2013 15:40 | 0 |
| 10/24/2013 7:30  | 0.161406026 | 10/16/2013 15:50 | 0 |
| 10/24/2013 7:45  | 0.16990108  | 10/16/2013 16:00 | 0 |
| 10/24/2013 8:00  | 0.172732764 | 10/16/2013 16:10 | 0 |
| 10/24/2013 8:15  | 0.181227818 | 10/16/2013 16:20 | 0 |
| 10/24/2013 8:30  | 0.186891188 | 10/16/2013 16:30 | 0 |
| 10/24/2013 8:45  | 0.195386242 | 10/16/2013 16:40 | 0 |
| 10/24/2013 9:00  | 0.201049611 | 10/16/2013 16:50 | 0 |
| 10/24/2013 9:15  | 0.203881296 | 10/16/2013 17:00 | 0 |
| 10/24/2013 9:30  | 0.209544665 | 10/16/2013 17:10 | 0 |
| 10/24/2013 9:45  | 0.209544665 | 10/16/2013 17:20 | 0 |
| 10/24/2013 10:00 | 0.215208034 | 10/16/2013 17:30 | 0 |
| 10/24/2013 10:15 | 0.223703088 | 10/16/2013 17:40 | 0 |
| 10/24/2013 10:30 | 0.223703088 | 10/16/2013 17:50 | 0 |
| 10/24/2013 10:45 | 0.218039719 | 10/16/2013 18:00 | 0 |
| 10/24/2013 11:00 | 0.215208034 | 10/16/2013 18:10 | 0 |
| 10/24/2013 11:15 | 0.215208034 | 10/16/2013 18:20 | 0 |
| 10/24/2013 11:30 | 0.209544665 | 10/16/2013 18:30 | 0 |
| 10/24/2013 11:45 | 0.209544665 | 10/16/2013 18:40 | 0 |
| 10/24/2013 12:00 | 0.209544665 | 10/16/2013 18:50 | 0 |
| 10/24/2013 12:15 | 0.203881296 | 10/16/2013 19:00 | 0 |
| 10/24/2013 12:30 | 0.203881296 | 10/16/2013 19:10 | 0 |
| 10/24/2013 12:45 | 0.203881296 | 10/16/2013 19:20 | 0 |



|                  |             |                  |   |
|------------------|-------------|------------------|---|
| 10/24/2013 13:00 | 0.201049611 | 10/16/2013 19:30 | 0 |
| 10/24/2013 13:15 | 0.201049611 | 10/16/2013 19:40 | 0 |
| 10/24/2013 13:30 | 0.195386242 | 10/16/2013 19:50 | 0 |
| 10/24/2013 13:45 | 0.201049611 | 10/16/2013 20:00 | 0 |
| 10/24/2013 14:00 | 0.195386242 | 10/16/2013 20:10 | 0 |
| 10/24/2013 14:15 | 0.195386242 | 10/16/2013 20:20 | 0 |
| 10/24/2013 14:30 | 0.195386242 | 10/16/2013 20:30 | 0 |
| 10/24/2013 14:45 | 0.201049611 | 10/16/2013 20:40 | 0 |
| 10/24/2013 15:00 | 0.195386242 | 10/16/2013 20:50 | 0 |
| 10/24/2013 15:15 | 0.195386242 | 10/16/2013 21:00 | 0 |
| 10/24/2013 15:30 | 0.195386242 | 10/16/2013 21:10 | 0 |
| 10/24/2013 15:45 | 0.195386242 | 10/16/2013 21:20 | 0 |
| 10/24/2013 16:00 | 0.195386242 | 10/16/2013 21:30 | 0 |
| 10/24/2013 16:15 | 0.189722872 | 10/16/2013 21:40 | 0 |
| 10/24/2013 16:30 | 0.195386242 | 10/16/2013 21:50 | 0 |
| 10/24/2013 16:45 | 0.189722872 | 10/16/2013 22:00 | 0 |
| 10/24/2013 17:00 | 0.189722872 | 10/16/2013 22:10 | 0 |
| 10/24/2013 17:15 | 0.189722872 | 10/16/2013 22:20 | 0 |
| 10/24/2013 17:30 | 0.189722872 | 10/16/2013 22:30 | 0 |
| 10/24/2013 17:45 | 0.189722872 | 10/16/2013 22:40 | 0 |
| 10/24/2013 18:00 | 0.189722872 | 10/16/2013 22:50 | 0 |
| 10/24/2013 18:15 | 0.189722872 | 10/16/2013 23:00 | 0 |
| 10/24/2013 18:30 | 0.189722872 | 10/16/2013 23:10 | 0 |
| 10/24/2013 18:45 | 0.195386242 | 10/16/2013 23:20 | 0 |
| 10/24/2013 19:00 | 0.195386242 | 10/16/2013 23:30 | 0 |
| 10/24/2013 19:15 | 0.195386242 | 10/16/2013 23:40 | 0 |
| 10/24/2013 19:30 | 0.195386242 | 10/16/2013 23:50 | 0 |
| 10/24/2013 19:45 | 0.201049611 | 10/17/2013 0:00  | 0 |
| 10/24/2013 20:00 | 0.201049611 | 10/17/2013 0:10  | 0 |
| 10/24/2013 20:15 | 0.201049611 | 10/17/2013 0:20  | 0 |
| 10/24/2013 20:30 | 0.203881296 | 10/17/2013 0:30  | 0 |
| 10/24/2013 20:45 | 0.203881296 | 10/17/2013 0:40  | 0 |
| 10/24/2013 21:00 | 0.203881296 | 10/17/2013 0:50  | 0 |
| 10/24/2013 21:15 | 0.203881296 | 10/17/2013 1:00  | 0 |
| 10/24/2013 21:30 | 0.203881296 | 10/17/2013 1:10  | 0 |
| 10/24/2013 21:45 | 0.209544665 | 10/17/2013 1:20  | 0 |
| 10/24/2013 22:00 | 0.209544665 | 10/17/2013 1:30  | 0 |
| 10/24/2013 22:15 | 0.209544665 | 10/17/2013 1:40  | 0 |
| 10/24/2013 22:30 | 0.209544665 | 10/17/2013 1:50  | 0 |
| 10/24/2013 22:45 | 0.209544665 | 10/17/2013 2:00  | 0 |
| 10/24/2013 23:00 | 0.209544665 | 10/17/2013 2:10  | 0 |
| 10/24/2013 23:15 | 0.209544665 | 10/17/2013 2:20  | 0 |
| 10/24/2013 23:30 | 0.209544665 | 10/17/2013 2:30  | 0 |
| 10/24/2013 23:45 | 0.203881296 | 10/17/2013 2:40  | 0 |
| 10/25/2013 0:00  | 0.203881296 | 10/17/2013 2:50  | 0 |
| 10/25/2013 0:15  | 0.203881296 | 10/17/2013 3:00  | 0 |
| 10/25/2013 0:30  | 0.201049611 | 10/17/2013 3:10  | 0 |

|                  |             |                  |   |
|------------------|-------------|------------------|---|
| 10/25/2013 0:45  | 0.195386242 | 10/17/2013 3:20  | 0 |
| 10/25/2013 1:00  | 0.195386242 | 10/17/2013 3:30  | 0 |
| 10/25/2013 1:15  | 0.189722872 | 10/17/2013 3:40  | 0 |
| 10/25/2013 1:30  | 0.186891188 | 10/17/2013 3:50  | 0 |
| 10/25/2013 1:45  | 0.186891188 | 10/17/2013 4:00  | 0 |
| 10/25/2013 2:00  | 0.181227818 | 10/17/2013 4:10  | 0 |
| 10/25/2013 2:15  | 0.178396134 | 10/17/2013 4:20  | 0 |
| 10/25/2013 2:30  | 0.172732764 | 10/17/2013 4:30  | 0 |
| 10/25/2013 2:45  | 0.16990108  | 10/17/2013 4:40  | 0 |
| 10/25/2013 3:00  | 0.16423771  | 10/17/2013 4:50  | 0 |
| 10/25/2013 3:15  | 0.161406026 | 10/17/2013 5:00  | 0 |
| 10/25/2013 3:30  | 0.161406026 | 10/17/2013 5:10  | 0 |
| 10/25/2013 3:45  | 0.161406026 | 10/17/2013 5:20  | 0 |
| 10/25/2013 4:00  | 0.161406026 | 10/17/2013 5:30  | 0 |
| 10/25/2013 4:15  | 0.161406026 | 10/17/2013 5:40  | 0 |
| 10/25/2013 4:30  | 0.161406026 | 10/17/2013 5:50  | 0 |
| 10/25/2013 4:45  | 0.155742656 | 10/17/2013 6:00  | 0 |
| 10/25/2013 5:00  | 0.155742656 | 10/17/2013 6:10  | 0 |
| 10/25/2013 5:15  | 0.155742656 | 10/17/2013 6:20  | 0 |
| 10/25/2013 5:30  | 0.152910972 | 10/17/2013 6:30  | 0 |
| 10/25/2013 5:45  | 0.152910972 | 10/17/2013 6:40  | 0 |
| 10/25/2013 6:00  | 0.152910972 | 10/17/2013 6:50  | 0 |
| 10/25/2013 6:15  | 0.152910972 | 10/17/2013 7:00  | 0 |
| 10/25/2013 6:30  | 0.152910972 | 10/17/2013 7:10  | 0 |
| 10/25/2013 6:45  | 0.152910972 | 10/17/2013 7:20  | 0 |
| 10/25/2013 7:00  | 0.155742656 | 10/17/2013 7:30  | 0 |
| 10/25/2013 7:15  | 0.155742656 | 10/17/2013 7:40  | 0 |
| 10/25/2013 7:30  | 0.161406026 | 10/17/2013 7:50  | 0 |
| 10/25/2013 7:45  | 0.16423771  | 10/17/2013 8:00  | 0 |
| 10/25/2013 8:00  | 0.172732764 | 10/17/2013 8:10  | 0 |
| 10/25/2013 8:15  | 0.181227818 | 10/17/2013 8:20  | 0 |
| 10/25/2013 8:30  | 0.189722872 | 10/17/2013 8:30  | 0 |
| 10/25/2013 8:45  | 0.201049611 | 10/17/2013 8:40  | 0 |
| 10/25/2013 9:00  | 0.203881296 | 10/17/2013 8:50  | 0 |
| 10/25/2013 9:15  | 0.215208034 | 10/17/2013 9:00  | 0 |
| 10/25/2013 9:30  | 0.215208034 | 10/17/2013 9:10  | 0 |
| 10/25/2013 9:45  | 0.215208034 | 10/17/2013 9:20  | 0 |
| 10/25/2013 10:00 | 0.215208034 | 10/17/2013 9:30  | 0 |
| 10/25/2013 10:15 | 0.218039719 | 10/17/2013 9:40  | 0 |
| 10/25/2013 10:30 | 0.218039719 | 10/17/2013 9:50  | 0 |
| 10/25/2013 10:45 | 0.218039719 | 10/17/2013 10:00 | 0 |
| 10/25/2013 11:00 | 0.218039719 | 10/17/2013 10:10 | 0 |
| 10/25/2013 11:15 | 0.218039719 | 10/17/2013 10:20 | 0 |
| 10/25/2013 11:30 | 0.218039719 | 10/17/2013 10:30 | 0 |
| 10/25/2013 11:45 | 0.215208034 | 10/17/2013 10:40 | 0 |
| 10/25/2013 12:00 | 0.215208034 | 10/17/2013 10:50 | 0 |
| 10/25/2013 12:15 | 0.209544665 | 10/17/2013 11:00 | 0 |

|                  |             |                  |   |
|------------------|-------------|------------------|---|
| 10/25/2013 12:30 | 0.209544665 | 10/17/2013 11:10 | 0 |
| 10/25/2013 12:45 | 0.209544665 | 10/17/2013 11:20 | 0 |
| 10/25/2013 13:00 | 0.203881296 | 10/17/2013 11:30 | 0 |
| 10/25/2013 13:15 | 0.201049611 | 10/17/2013 11:40 | 0 |
| 10/25/2013 13:30 | 0.203881296 | 10/17/2013 11:50 | 0 |
| 10/25/2013 13:45 | 0.203881296 | 10/17/2013 12:00 | 0 |
| 10/25/2013 14:00 | 0.203881296 | 10/17/2013 12:10 | 0 |
| 10/25/2013 14:15 | 0.203881296 | 10/17/2013 12:20 | 0 |
| 10/25/2013 14:30 | 0.201049611 | 10/17/2013 12:30 | 0 |
| 10/25/2013 14:45 | 0.201049611 | 10/17/2013 12:40 | 0 |
| 10/25/2013 15:00 | 0.201049611 | 10/17/2013 12:50 | 0 |
| 10/25/2013 15:15 | 0.201049611 | 10/17/2013 13:00 | 0 |
| 10/25/2013 15:30 | 0.201049611 | 10/17/2013 13:10 | 0 |
| 10/25/2013 15:45 | 0.201049611 | 10/17/2013 13:20 | 0 |
| 10/25/2013 16:00 | 0.195386242 | 10/17/2013 13:30 | 0 |
| 10/25/2013 16:15 | 0.195386242 | 10/17/2013 13:40 | 0 |
| 10/25/2013 16:30 | 0.195386242 | 10/17/2013 13:50 | 0 |
| 10/25/2013 16:45 | 0.189722872 | 10/17/2013 14:00 | 0 |
| 10/25/2013 17:00 | 0.195386242 | 10/17/2013 14:10 | 0 |
| 10/25/2013 17:15 | 0.189722872 | 10/17/2013 14:20 | 0 |
| 10/25/2013 17:30 | 0.195386242 | 10/17/2013 14:30 | 0 |
| 10/25/2013 17:45 | 0.186891188 | 10/17/2013 14:40 | 0 |
| 10/25/2013 18:00 | 0.186891188 | 10/17/2013 14:50 | 0 |
| 10/25/2013 18:15 | 0.189722872 | 10/17/2013 15:00 | 0 |
| 10/25/2013 18:30 | 0.195386242 | 10/17/2013 15:10 | 0 |
| 10/25/2013 18:45 | 0.195386242 | 10/17/2013 15:20 | 0 |
| 10/25/2013 19:00 | 0.195386242 | 10/17/2013 15:30 | 0 |
| 10/25/2013 19:15 | 0.201049611 | 10/17/2013 15:40 | 0 |
| 10/25/2013 19:30 | 0.201049611 | 10/17/2013 15:50 | 0 |
| 10/25/2013 19:45 | 0.195386242 | 10/17/2013 16:00 | 0 |
| 10/25/2013 20:00 | 0.201049611 | 10/17/2013 16:10 | 0 |
| 10/25/2013 20:15 | 0.201049611 | 10/17/2013 16:20 | 0 |
| 10/25/2013 20:30 | 0.201049611 | 10/17/2013 16:30 | 0 |
| 10/25/2013 20:45 | 0.195386242 | 10/17/2013 16:40 | 0 |
| 10/25/2013 21:00 | 0.201049611 | 10/17/2013 16:50 | 0 |
| 10/25/2013 21:15 | 0.201049611 | 10/17/2013 17:00 | 0 |
| 10/25/2013 21:30 | 0.201049611 | 10/17/2013 17:10 | 0 |
| 10/25/2013 21:45 | 0.201049611 | 10/17/2013 17:20 | 0 |
| 10/25/2013 22:00 | 0.201049611 | 10/17/2013 17:30 | 0 |
| 10/25/2013 22:15 | 0.201049611 | 10/17/2013 17:40 | 0 |
| 10/25/2013 22:30 | 0.201049611 | 10/17/2013 17:50 | 0 |
| 10/25/2013 22:45 | 0.201049611 | 10/17/2013 18:00 | 0 |
| 10/25/2013 23:00 | 0.201049611 | 10/17/2013 18:10 | 0 |
| 10/25/2013 23:15 | 0.195386242 | 10/17/2013 18:20 | 0 |
| 10/25/2013 23:30 | 0.195386242 | 10/17/2013 18:30 | 0 |
| 10/25/2013 23:45 | 0.195386242 | 10/17/2013 18:40 | 0 |
| 10/26/2013 0:00  | 0.195386242 | 10/17/2013 18:50 | 0 |

|                  |             |                  |   |
|------------------|-------------|------------------|---|
| 10/26/2013 0:15  | 0.195386242 | 10/17/2013 19:00 | 0 |
| 10/26/2013 0:30  | 0.189722872 | 10/17/2013 19:10 | 0 |
| 10/26/2013 0:45  | 0.189722872 | 10/17/2013 19:20 | 0 |
| 10/26/2013 1:00  | 0.186891188 | 10/17/2013 19:30 | 0 |
| 10/26/2013 1:15  | 0.186891188 | 10/17/2013 19:40 | 0 |
| 10/26/2013 1:30  | 0.186891188 | 10/17/2013 19:50 | 0 |
| 10/26/2013 1:45  | 0.178396134 | 10/17/2013 20:00 | 0 |
| 10/26/2013 2:00  | 0.178396134 | 10/17/2013 20:10 | 0 |
| 10/26/2013 2:15  | 0.178396134 | 10/17/2013 20:20 | 0 |
| 10/26/2013 2:30  | 0.172732764 | 10/17/2013 20:30 | 0 |
| 10/26/2013 2:45  | 0.172732764 | 10/17/2013 20:40 | 0 |
| 10/26/2013 3:00  | 0.16990108  | 10/17/2013 20:50 | 0 |
| 10/26/2013 3:15  | 0.16423771  | 10/17/2013 21:00 | 0 |
| 10/26/2013 3:30  | 0.161406026 | 10/17/2013 21:10 | 0 |
| 10/26/2013 3:45  | 0.161406026 | 10/17/2013 21:20 | 0 |
| 10/26/2013 4:00  | 0.161406026 | 10/17/2013 21:30 | 0 |
| 10/26/2013 4:15  | 0.161406026 | 10/17/2013 21:40 | 0 |
| 10/26/2013 4:30  | 0.155742656 | 10/17/2013 21:50 | 0 |
| 10/26/2013 4:45  | 0.155742656 | 10/17/2013 22:00 | 0 |
| 10/26/2013 5:00  | 0.152910972 | 10/17/2013 22:10 | 0 |
| 10/26/2013 5:15  | 0.152910972 | 10/17/2013 22:20 | 0 |
| 10/26/2013 5:30  | 0.152910972 | 10/17/2013 22:30 | 0 |
| 10/26/2013 5:45  | 0.150079287 | 10/17/2013 22:40 | 0 |
| 10/26/2013 6:00  | 0.150079287 | 10/17/2013 22:50 | 0 |
| 10/26/2013 6:15  | 0.150079287 | 10/17/2013 23:00 | 0 |
| 10/26/2013 6:30  | 0.150079287 | 10/17/2013 23:10 | 0 |
| 10/26/2013 6:45  | 0.150079287 | 10/17/2013 23:20 | 0 |
| 10/26/2013 7:00  | 0.152910972 | 10/17/2013 23:30 | 0 |
| 10/26/2013 7:15  | 0.150079287 | 10/17/2013 23:40 | 0 |
| 10/26/2013 7:30  | 0.150079287 | 10/17/2013 23:50 | 0 |
| 10/26/2013 7:45  | 0.152910972 | 10/18/2013 0:00  | 0 |
| 10/26/2013 8:00  | 0.155742656 | 10/18/2013 0:10  | 0 |
| 10/26/2013 8:15  | 0.155742656 | 10/18/2013 0:20  | 0 |
| 10/26/2013 8:30  | 0.161406026 | 10/18/2013 0:30  | 0 |
| 10/26/2013 8:45  | 0.16423771  | 10/18/2013 0:40  | 0 |
| 10/26/2013 9:00  | 0.16990108  | 10/18/2013 0:50  | 0 |
| 10/26/2013 9:15  | 0.16990108  | 10/18/2013 1:00  | 0 |
| 10/26/2013 9:30  | 0.178396134 | 10/18/2013 1:10  | 0 |
| 10/26/2013 9:45  | 0.181227818 | 10/18/2013 1:20  | 0 |
| 10/26/2013 10:00 | 0.181227818 | 10/18/2013 1:30  | 0 |
| 10/26/2013 10:15 | 0.186891188 | 10/18/2013 1:40  | 0 |
| 10/26/2013 10:30 | 0.189722872 | 10/18/2013 1:50  | 0 |
| 10/26/2013 10:45 | 0.201049611 | 10/18/2013 2:00  | 0 |
| 10/26/2013 11:00 | 0.203881296 | 10/18/2013 2:10  | 0 |
| 10/26/2013 11:15 | 0.209544665 | 10/18/2013 2:20  | 0 |
| 10/26/2013 11:30 | 0.209544665 | 10/18/2013 2:30  | 0 |
| 10/26/2013 11:45 | 0.215208034 | 10/18/2013 2:40  | 0 |

|                  |             |                  |   |
|------------------|-------------|------------------|---|
| 10/26/2013 12:00 | 0.215208034 | 10/18/2013 2:50  | 0 |
| 10/26/2013 12:15 | 0.215208034 | 10/18/2013 3:00  | 0 |
| 10/26/2013 12:30 | 0.218039719 | 10/18/2013 3:10  | 0 |
| 10/26/2013 12:45 | 0.215208034 | 10/18/2013 3:20  | 0 |
| 10/26/2013 13:00 | 0.218039719 | 10/18/2013 3:30  | 0 |
| 10/26/2013 13:15 | 0.218039719 | 10/18/2013 3:40  | 0 |
| 10/26/2013 13:30 | 0.223703088 | 10/18/2013 3:50  | 0 |
| 10/26/2013 13:45 | 0.218039719 | 10/18/2013 4:00  | 0 |
| 10/26/2013 14:00 | 0.223703088 | 10/18/2013 4:10  | 0 |
| 10/26/2013 14:15 | 0.218039719 | 10/18/2013 4:20  | 0 |
| 10/26/2013 14:30 | 0.215208034 | 10/18/2013 4:30  | 0 |
| 10/26/2013 14:45 | 0.215208034 | 10/18/2013 4:40  | 0 |
| 10/26/2013 15:00 | 0.209544665 | 10/18/2013 4:50  | 0 |
| 10/26/2013 15:15 | 0.209544665 | 10/18/2013 5:00  | 0 |
| 10/26/2013 15:30 | 0.209544665 | 10/18/2013 5:10  | 0 |
| 10/26/2013 15:45 | 0.209544665 | 10/18/2013 5:20  | 0 |
| 10/26/2013 16:00 | 0.203881296 | 10/18/2013 5:30  | 0 |
| 10/26/2013 16:15 | 0.203881296 | 10/18/2013 5:40  | 0 |
| 10/26/2013 16:30 | 0.203881296 | 10/18/2013 5:50  | 0 |
| 10/26/2013 16:45 | 0.201049611 | 10/18/2013 6:00  | 0 |
| 10/26/2013 17:00 | 0.203881296 | 10/18/2013 6:10  | 0 |
| 10/26/2013 17:15 | 0.201049611 | 10/18/2013 6:20  | 0 |
| 10/26/2013 17:30 | 0.201049611 | 10/18/2013 6:30  | 0 |
| 10/26/2013 17:45 | 0.203881296 | 10/18/2013 6:40  | 0 |
| 10/26/2013 18:00 | 0.201049611 | 10/18/2013 6:50  | 0 |
| 10/26/2013 18:15 | 0.201049611 | 10/18/2013 7:00  | 0 |
| 10/26/2013 18:30 | 0.201049611 | 10/18/2013 7:10  | 0 |
| 10/26/2013 18:45 | 0.201049611 | 10/18/2013 7:20  | 0 |
| 10/26/2013 19:00 | 0.201049611 | 10/18/2013 7:30  | 0 |
| 10/26/2013 19:15 | 0.201049611 | 10/18/2013 7:40  | 0 |
| 10/26/2013 19:30 | 0.195386242 | 10/18/2013 7:50  | 0 |
| 10/26/2013 19:45 | 0.195386242 | 10/18/2013 8:00  | 0 |
| 10/26/2013 20:00 | 0.195386242 | 10/18/2013 8:10  | 0 |
| 10/26/2013 20:15 | 0.195386242 | 10/18/2013 8:20  | 0 |
| 10/26/2013 20:30 | 0.195386242 | 10/18/2013 8:30  | 0 |
| 10/26/2013 20:45 | 0.195386242 | 10/18/2013 8:40  | 0 |
| 10/26/2013 21:00 | 0.195386242 | 10/18/2013 8:50  | 0 |
| 10/26/2013 21:15 | 0.195386242 | 10/18/2013 9:00  | 0 |
| 10/26/2013 21:30 | 0.195386242 | 10/18/2013 9:10  | 0 |
| 10/26/2013 21:45 | 0.195386242 | 10/18/2013 9:20  | 0 |
| 10/26/2013 22:00 | 0.195386242 | 10/18/2013 9:30  | 0 |
| 10/26/2013 22:15 | 0.195386242 | 10/18/2013 9:40  | 0 |
| 10/26/2013 22:30 | 0.189722872 | 10/18/2013 9:50  | 0 |
| 10/26/2013 22:45 | 0.195386242 | 10/18/2013 10:00 | 0 |
| 10/26/2013 23:00 | 0.189722872 | 10/18/2013 10:10 | 0 |
| 10/26/2013 23:15 | 0.189722872 | 10/18/2013 10:20 | 0 |
| 10/26/2013 23:30 | 0.189722872 | 10/18/2013 10:30 | 0 |

|                  |             |                  |   |
|------------------|-------------|------------------|---|
| 10/26/2013 23:45 | 0.189722872 | 10/18/2013 10:40 | 0 |
| 10/27/2013 0:00  | 0.186891188 | 10/18/2013 10:50 | 0 |
| 10/27/2013 0:15  | 0.186891188 | 10/18/2013 11:00 | 0 |
| 10/27/2013 0:30  | 0.186891188 | 10/18/2013 11:10 | 0 |
| 10/27/2013 0:45  | 0.181227818 | 10/18/2013 11:20 | 0 |
| 10/27/2013 1:00  | 0.178396134 | 10/18/2013 11:30 | 0 |
| 10/27/2013 1:15  | 0.178396134 | 10/18/2013 11:40 | 0 |
| 10/27/2013 1:30  | 0.178396134 | 10/18/2013 11:50 | 0 |
| 10/27/2013 1:45  | 0.172732764 | 10/18/2013 12:00 | 0 |
| 10/27/2013 2:00  | 0.172732764 | 10/18/2013 12:10 | 0 |
| 10/27/2013 2:15  | 0.16990108  | 10/18/2013 12:20 | 0 |
| 10/27/2013 2:30  | 0.16990108  | 10/18/2013 12:30 | 0 |
| 10/27/2013 2:45  | 0.16423771  | 10/18/2013 12:40 | 0 |
| 10/27/2013 3:00  | 0.161406026 | 10/18/2013 12:50 | 0 |
| 10/27/2013 3:15  | 0.161406026 | 10/18/2013 13:00 | 0 |
| 10/27/2013 3:30  | 0.155742656 | 10/18/2013 13:10 | 0 |
| 10/27/2013 3:45  | 0.155742656 | 10/18/2013 13:20 | 0 |
| 10/27/2013 4:00  | 0.155742656 | 10/18/2013 13:30 | 0 |
| 10/27/2013 4:15  | 0.155742656 | 10/18/2013 13:40 | 0 |
| 10/27/2013 4:30  | 0.152910972 | 10/18/2013 13:50 | 0 |
| 10/27/2013 4:45  | 0.152910972 | 10/18/2013 14:00 | 0 |
| 10/27/2013 5:00  | 0.152910972 | 10/18/2013 14:10 | 0 |
| 10/27/2013 5:15  | 0.150079287 | 10/18/2013 14:20 | 0 |
| 10/27/2013 5:30  | 0.150079287 | 10/18/2013 14:30 | 0 |
| 10/27/2013 5:45  | 0.150079287 | 10/18/2013 14:40 | 0 |
| 10/27/2013 6:00  | 0.150079287 | 10/18/2013 14:50 | 0 |
| 10/27/2013 6:15  | 0.144415918 | 10/18/2013 15:00 | 0 |
| 10/27/2013 6:30  | 0.144415918 | 10/18/2013 15:10 | 0 |
| 10/27/2013 6:45  | 0.144415918 | 10/18/2013 15:20 | 0 |
| 10/27/2013 7:00  | 0.144415918 | 10/18/2013 15:30 | 0 |
| 10/27/2013 7:15  | 0.144415918 | 10/18/2013 15:40 | 0 |
| 10/27/2013 7:30  | 0.150079287 | 10/18/2013 15:50 | 0 |
| 10/27/2013 7:45  | 0.150079287 | 10/18/2013 16:00 | 0 |
| 10/27/2013 8:00  | 0.150079287 | 10/18/2013 16:10 | 0 |
| 10/27/2013 8:15  | 0.150079287 | 10/18/2013 16:20 | 0 |
| 10/27/2013 8:30  | 0.152910972 | 10/18/2013 16:30 | 0 |
| 10/27/2013 8:45  | 0.155742656 | 10/18/2013 16:40 | 0 |
| 10/27/2013 9:00  | 0.155742656 | 10/18/2013 16:50 | 0 |
| 10/27/2013 9:15  | 0.161406026 | 10/18/2013 17:00 | 0 |
| 10/27/2013 9:30  | 0.16990108  | 10/18/2013 17:10 | 0 |
| 10/27/2013 9:45  | 0.16990108  | 10/18/2013 17:20 | 0 |
| 10/27/2013 10:00 | 0.172732764 | 10/18/2013 17:30 | 0 |
| 10/27/2013 10:15 | 0.181227818 | 10/18/2013 17:40 | 0 |
| 10/27/2013 10:30 | 0.186891188 | 10/18/2013 17:50 | 0 |
| 10/27/2013 10:45 | 0.195386242 | 10/18/2013 18:00 | 0 |
| 10/27/2013 11:00 | 0.201049611 | 10/18/2013 18:10 | 0 |
| 10/27/2013 11:15 | 0.203881296 | 10/18/2013 18:20 | 0 |

|                  |             |                  |   |
|------------------|-------------|------------------|---|
| 10/27/2013 11:30 | 0.209544665 | 10/18/2013 18:30 | 0 |
| 10/27/2013 11:45 | 0.209544665 | 10/18/2013 18:40 | 0 |
| 10/27/2013 12:00 | 0.218039719 | 10/18/2013 18:50 | 0 |
| 10/27/2013 12:15 | 0.218039719 | 10/18/2013 19:00 | 0 |
| 10/27/2013 12:30 | 0.218039719 | 10/18/2013 19:10 | 0 |
| 10/27/2013 12:45 | 0.223703088 | 10/18/2013 19:20 | 0 |
| 10/27/2013 13:00 | 0.223703088 | 10/18/2013 19:30 | 0 |
| 10/27/2013 13:15 | 0.223703088 | 10/18/2013 19:40 | 0 |
| 10/27/2013 13:30 | 0.223703088 | 10/18/2013 19:50 | 0 |
| 10/27/2013 13:45 | 0.223703088 | 10/18/2013 20:00 | 0 |
| 10/27/2013 14:00 | 0.218039719 | 10/18/2013 20:10 | 0 |
| 10/27/2013 14:15 | 0.223703088 | 10/18/2013 20:20 | 0 |
| 10/27/2013 14:30 | 0.223703088 | 10/18/2013 20:30 | 0 |
| 10/27/2013 14:45 | 0.223703088 | 10/18/2013 20:40 | 0 |
| 10/27/2013 15:00 | 0.218039719 | 10/18/2013 20:50 | 0 |
| 10/27/2013 15:15 | 0.215208034 | 10/18/2013 21:00 | 0 |
| 10/27/2013 15:30 | 0.218039719 | 10/18/2013 21:10 | 0 |
| 10/27/2013 15:45 | 0.215208034 | 10/18/2013 21:20 | 0 |
| 10/27/2013 16:00 | 0.215208034 | 10/18/2013 21:30 | 0 |
| 10/27/2013 16:15 | 0.215208034 | 10/18/2013 21:40 | 0 |
| 10/27/2013 16:30 | 0.215208034 | 10/18/2013 21:50 | 0 |
| 10/27/2013 16:45 | 0.209544665 | 10/18/2013 22:00 | 0 |
| 10/27/2013 17:00 | 0.203881296 | 10/18/2013 22:10 | 0 |
| 10/27/2013 17:15 | 0.203881296 | 10/18/2013 22:20 | 0 |
| 10/27/2013 17:30 | 0.203881296 | 10/18/2013 22:30 | 0 |
| 10/27/2013 17:45 | 0.203881296 | 10/18/2013 22:40 | 0 |
| 10/27/2013 18:00 | 0.203881296 | 10/18/2013 22:50 | 0 |
| 10/27/2013 18:15 | 0.203881296 | 10/18/2013 23:00 | 0 |
| 10/27/2013 18:30 | 0.203881296 | 10/18/2013 23:10 | 0 |
| 10/27/2013 18:45 | 0.203881296 | 10/18/2013 23:20 | 0 |
| 10/27/2013 19:00 | 0.203881296 | 10/18/2013 23:30 | 0 |
| 10/27/2013 19:15 | 0.203881296 | 10/18/2013 23:40 | 0 |
| 10/27/2013 19:30 | 0.203881296 | 10/18/2013 23:50 | 0 |
| 10/27/2013 19:45 | 0.203881296 | 10/19/2013 0:00  | 0 |
| 10/27/2013 20:00 | 0.209544665 | 10/19/2013 0:10  | 0 |
| 10/27/2013 20:15 | 0.209544665 | 10/19/2013 0:20  | 0 |
| 10/27/2013 20:30 | 0.209544665 | 10/19/2013 0:30  | 0 |
| 10/27/2013 20:45 | 0.215208034 | 10/19/2013 0:40  | 0 |
| 10/27/2013 21:00 | 0.215208034 | 10/19/2013 0:50  | 0 |
| 10/27/2013 21:15 | 0.215208034 | 10/19/2013 1:00  | 0 |
| 10/27/2013 21:30 | 0.215208034 | 10/19/2013 1:10  | 0 |
| 10/27/2013 21:45 | 0.218039719 | 10/19/2013 1:20  | 0 |
| 10/27/2013 22:00 | 0.215208034 | 10/19/2013 1:30  | 0 |
| 10/27/2013 22:15 | 0.218039719 | 10/19/2013 1:40  | 0 |
| 10/27/2013 22:30 | 0.215208034 | 10/19/2013 1:50  | 0 |
| 10/27/2013 22:45 | 0.215208034 | 10/19/2013 2:00  | 0 |
| 10/27/2013 23:00 | 0.209544665 | 10/19/2013 2:10  | 0 |

|                  |             |                  |   |
|------------------|-------------|------------------|---|
| 10/27/2013 23:15 | 0.209544665 | 10/19/2013 2:20  | 0 |
| 10/27/2013 23:30 | 0.209544665 | 10/19/2013 2:30  | 0 |
| 10/27/2013 23:45 | 0.209544665 | 10/19/2013 2:40  | 0 |
| 10/28/2013 0:00  | 0.201049611 | 10/19/2013 2:50  | 0 |
| 10/28/2013 0:15  | 0.201049611 | 10/19/2013 3:00  | 0 |
| 10/28/2013 0:30  | 0.195386242 | 10/19/2013 3:10  | 0 |
| 10/28/2013 0:45  | 0.195386242 | 10/19/2013 3:20  | 0 |
| 10/28/2013 1:00  | 0.189722872 | 10/19/2013 3:30  | 0 |
| 10/28/2013 1:15  | 0.186891188 | 10/19/2013 3:40  | 0 |
| 10/28/2013 1:30  | 0.186891188 | 10/19/2013 3:50  | 0 |
| 10/28/2013 1:45  | 0.178396134 | 10/19/2013 4:00  | 0 |
| 10/28/2013 2:00  | 0.172732764 | 10/19/2013 4:10  | 0 |
| 10/28/2013 2:15  | 0.172732764 | 10/19/2013 4:20  | 0 |
| 10/28/2013 2:30  | 0.16990108  | 10/19/2013 4:30  | 0 |
| 10/28/2013 2:45  | 0.16990108  | 10/19/2013 4:40  | 0 |
| 10/28/2013 3:00  | 0.161406026 | 10/19/2013 4:50  | 0 |
| 10/28/2013 3:15  | 0.161406026 | 10/19/2013 5:00  | 0 |
| 10/28/2013 3:30  | 0.161406026 | 10/19/2013 5:10  | 0 |
| 10/28/2013 3:45  | 0.161406026 | 10/19/2013 5:20  | 0 |
| 10/28/2013 4:00  | 0.155742656 | 10/19/2013 5:30  | 0 |
| 10/28/2013 4:15  | 0.155742656 | 10/19/2013 5:40  | 0 |
| 10/28/2013 4:30  | 0.152910972 | 10/19/2013 5:50  | 0 |
| 10/28/2013 4:45  | 0.152910972 | 10/19/2013 6:00  | 0 |
| 10/28/2013 5:00  | 0.155742656 | 10/19/2013 6:10  | 0 |
| 10/28/2013 5:15  | 0.152910972 | 10/19/2013 6:20  | 0 |
| 10/28/2013 5:30  | 0.152910972 | 10/19/2013 6:30  | 0 |
| 10/28/2013 5:45  | 0.152910972 | 10/19/2013 6:40  | 0 |
| 10/28/2013 6:00  | 0.152910972 | 10/19/2013 6:50  | 0 |
| 10/28/2013 6:15  | 0.152910972 | 10/19/2013 7:00  | 0 |
| 10/28/2013 6:30  | 0.150079287 | 10/19/2013 7:10  | 0 |
| 10/28/2013 6:45  | 0.152910972 | 10/19/2013 7:20  | 0 |
| 10/28/2013 7:00  | 0.152910972 | 10/19/2013 7:30  | 0 |
| 10/28/2013 7:15  | 0.155742656 | 10/19/2013 7:40  | 0 |
| 10/28/2013 7:30  | 0.161406026 | 10/19/2013 7:50  | 0 |
| 10/28/2013 7:45  | 0.16423771  | 10/19/2013 8:00  | 0 |
| 10/28/2013 8:00  | 0.172732764 | 10/19/2013 8:10  | 0 |
| 10/28/2013 8:15  | 0.181227818 | 10/19/2013 8:20  | 0 |
| 10/28/2013 8:30  | 0.186891188 | 10/19/2013 8:30  | 0 |
| 10/28/2013 8:45  | 0.189722872 | 10/19/2013 8:40  | 0 |
| 10/28/2013 9:00  | 0.201049611 | 10/19/2013 8:50  | 0 |
| 10/28/2013 9:15  | 0.209544665 | 10/19/2013 9:00  | 0 |
| 10/28/2013 9:30  | 0.215208034 | 10/19/2013 9:10  | 0 |
| 10/28/2013 9:45  | 0.218039719 | 10/19/2013 9:20  | 0 |
| 10/28/2013 10:00 | 0.218039719 | 10/19/2013 9:30  | 0 |
| 10/28/2013 10:15 | 0.218039719 | 10/19/2013 9:40  | 0 |
| 10/28/2013 10:30 | 0.218039719 | 10/19/2013 9:50  | 0 |
| 10/28/2013 10:45 | 0.215208034 | 10/19/2013 10:00 | 0 |



|                  |             |                  |   |
|------------------|-------------|------------------|---|
| 10/28/2013 11:00 | 0.215208034 | 10/19/2013 10:10 | 0 |
| 10/28/2013 11:15 | 0.209544665 | 10/19/2013 10:20 | 0 |
| 10/28/2013 11:30 | 0.215208034 | 10/19/2013 10:30 | 0 |
| 10/28/2013 11:45 | 0.209544665 | 10/19/2013 10:40 | 0 |
| 10/28/2013 12:00 | 0.209544665 | 10/19/2013 10:50 | 0 |
| 10/28/2013 12:15 | 0.209544665 | 10/19/2013 11:00 | 0 |
| 10/28/2013 12:30 | 0.203881296 | 10/19/2013 11:10 | 0 |
| 10/28/2013 12:45 | 0.203881296 | 10/19/2013 11:20 | 0 |
| 10/28/2013 13:00 | 0.203881296 | 10/19/2013 11:30 | 0 |
| 10/28/2013 13:15 | 0.201049611 | 10/19/2013 11:40 | 0 |
| 10/28/2013 13:30 | 0.201049611 | 10/19/2013 11:50 | 0 |
| 10/28/2013 13:45 | 0.201049611 | 10/19/2013 12:00 | 0 |
| 10/28/2013 14:00 | 0.201049611 | 10/19/2013 12:10 | 0 |
| 10/28/2013 14:15 | 0.203881296 | 10/19/2013 12:20 | 0 |
| 10/28/2013 14:30 | 0.201049611 | 10/19/2013 12:30 | 0 |
| 10/28/2013 14:45 | 0.201049611 | 10/19/2013 12:40 | 0 |
| 10/28/2013 15:00 | 0.201049611 | 10/19/2013 12:50 | 0 |
| 10/28/2013 15:15 | 0.201049611 | 10/19/2013 13:00 | 0 |
| 10/28/2013 15:30 | 0.195386242 | 10/19/2013 13:10 | 0 |
| 10/28/2013 15:45 | 0.195386242 | 10/19/2013 13:20 | 0 |
| 10/28/2013 16:00 | 0.201049611 | 10/19/2013 13:30 | 0 |
| 10/28/2013 16:15 | 0.195386242 | 10/19/2013 13:40 | 0 |
| 10/28/2013 16:30 | 0.189722872 | 10/19/2013 13:50 | 0 |
| 10/28/2013 16:45 | 0.189722872 | 10/19/2013 14:00 | 0 |
| 10/28/2013 17:00 | 0.189722872 | 10/19/2013 14:10 | 0 |
| 10/28/2013 17:15 | 0.189722872 | 10/19/2013 14:20 | 0 |
| 10/28/2013 17:30 | 0.186891188 | 10/19/2013 14:30 | 0 |
| 10/28/2013 17:45 | 0.186891188 | 10/19/2013 14:40 | 0 |
| 10/28/2013 18:00 | 0.186891188 | 10/19/2013 14:50 | 0 |
| 10/28/2013 18:15 | 0.186891188 | 10/19/2013 15:00 | 0 |
| 10/28/2013 18:30 | 0.189722872 | 10/19/2013 15:10 | 0 |
| 10/28/2013 18:45 | 0.189722872 | 10/19/2013 15:20 | 0 |
| 10/28/2013 19:00 | 0.189722872 | 10/19/2013 15:30 | 0 |
| 10/28/2013 19:15 | 0.189722872 | 10/19/2013 15:40 | 0 |
| 10/28/2013 19:30 | 0.195386242 | 10/19/2013 15:50 | 0 |
| 10/28/2013 19:45 | 0.195386242 | 10/19/2013 16:00 | 0 |
| 10/28/2013 20:00 | 0.195386242 | 10/19/2013 16:10 | 0 |
| 10/28/2013 20:15 | 0.195386242 | 10/19/2013 16:20 | 0 |
| 10/28/2013 20:30 | 0.201049611 | 10/19/2013 16:30 | 0 |
| 10/28/2013 20:45 | 0.201049611 | 10/19/2013 16:40 | 0 |
| 10/28/2013 21:00 | 0.203881296 | 10/19/2013 16:50 | 0 |
| 10/28/2013 21:15 | 0.203881296 | 10/19/2013 17:00 | 0 |
| 10/28/2013 21:30 | 0.203881296 | 10/19/2013 17:10 | 0 |
| 10/28/2013 21:45 | 0.209544665 | 10/19/2013 17:20 | 0 |
| 10/28/2013 22:00 | 0.209544665 | 10/19/2013 17:30 | 0 |
| 10/28/2013 22:15 | 0.209544665 | 10/19/2013 17:40 | 0 |
| 10/28/2013 22:30 | 0.209544665 | 10/19/2013 17:50 | 0 |

|                  |             |                  |   |
|------------------|-------------|------------------|---|
| 10/28/2013 22:45 | 0.209544665 | 10/19/2013 18:00 | 0 |
| 10/28/2013 23:00 | 0.209544665 | 10/19/2013 18:10 | 0 |
| 10/28/2013 23:15 | 0.209544665 | 10/19/2013 18:20 | 0 |
| 10/28/2013 23:30 | 0.203881296 | 10/19/2013 18:30 | 0 |
| 10/28/2013 23:45 | 0.203881296 | 10/19/2013 18:40 | 0 |
| 10/29/2013 0:00  | 0.201049611 | 10/19/2013 18:50 | 0 |
| 10/29/2013 0:15  | 0.201049611 | 10/19/2013 19:00 | 0 |
| 10/29/2013 0:30  | 0.195386242 | 10/19/2013 19:10 | 0 |
| 10/29/2013 0:45  | 0.189722872 | 10/19/2013 19:20 | 0 |
| 10/29/2013 1:00  | 0.189722872 | 10/19/2013 19:30 | 0 |
| 10/29/2013 1:15  | 0.186891188 | 10/19/2013 19:40 | 0 |
| 10/29/2013 1:30  | 0.181227818 | 10/19/2013 19:50 | 0 |
| 10/29/2013 1:45  | 0.178396134 | 10/19/2013 20:00 | 0 |
| 10/29/2013 2:00  | 0.172732764 | 10/19/2013 20:10 | 0 |
| 10/29/2013 2:15  | 0.172732764 | 10/19/2013 20:20 | 0 |
| 10/29/2013 2:30  | 0.16990108  | 10/19/2013 20:30 | 0 |
| 10/29/2013 2:45  | 0.16990108  | 10/19/2013 20:40 | 0 |
| 10/29/2013 3:00  | 0.16423771  | 10/19/2013 20:50 | 0 |
| 10/29/2013 3:15  | 0.16423771  | 10/19/2013 21:00 | 0 |
| 10/29/2013 3:30  | 0.161406026 | 10/19/2013 21:10 | 0 |
| 10/29/2013 3:45  | 0.155742656 | 10/19/2013 21:20 | 0 |
| 10/29/2013 4:00  | 0.155742656 | 10/19/2013 21:30 | 0 |
| 10/29/2013 4:15  | 0.155742656 | 10/19/2013 21:40 | 0 |
| 10/29/2013 4:30  | 0.155742656 | 10/19/2013 21:50 | 0 |
| 10/29/2013 4:45  | 0.152910972 | 10/19/2013 22:00 | 0 |
| 10/29/2013 5:00  | 0.152910972 | 10/19/2013 22:10 | 0 |
| 10/29/2013 5:15  | 0.152910972 | 10/19/2013 22:20 | 0 |
| 10/29/2013 5:30  | 0.152910972 | 10/19/2013 22:30 | 0 |
| 10/29/2013 5:45  | 0.152910972 | 10/19/2013 22:40 | 0 |
| 10/29/2013 6:00  | 0.150079287 | 10/19/2013 22:50 | 0 |
| 10/29/2013 6:15  | 0.150079287 | 10/19/2013 23:00 | 0 |
| 10/29/2013 6:30  | 0.150079287 | 10/19/2013 23:10 | 0 |
| 10/29/2013 6:45  | 0.150079287 | 10/19/2013 23:20 | 0 |
| 10/29/2013 7:00  | 0.152910972 | 10/19/2013 23:30 | 0 |
| 10/29/2013 7:15  | 0.155742656 | 10/19/2013 23:40 | 0 |
| 10/29/2013 7:30  | 0.155742656 | 10/19/2013 23:50 | 0 |
| 10/29/2013 7:45  | 0.161406026 | 10/20/2013 0:00  | 0 |
| 10/29/2013 8:00  | 0.16990108  | 10/20/2013 0:10  | 0 |
| 10/29/2013 8:15  | 0.172732764 | 10/20/2013 0:20  | 0 |
| 10/29/2013 8:30  | 0.186891188 | 10/20/2013 0:30  | 0 |
| 10/29/2013 8:45  | 0.195386242 | 10/20/2013 0:40  | 0 |
| 10/29/2013 9:00  | 0.201049611 | 10/20/2013 0:50  | 0 |
| 10/29/2013 9:15  | 0.209544665 | 10/20/2013 1:00  | 0 |
| 10/29/2013 9:30  | 0.215208034 | 10/20/2013 1:10  | 0 |
| 10/29/2013 9:45  | 0.218039719 | 10/20/2013 1:20  | 0 |
| 10/29/2013 10:00 | 0.218039719 | 10/20/2013 1:30  | 0 |
| 10/29/2013 10:15 | 0.218039719 | 10/20/2013 1:40  | 0 |

|                  |             |                 |   |
|------------------|-------------|-----------------|---|
| 10/29/2013 10:30 | 0.215208034 | 10/20/2013 1:50 | 0 |
| 10/29/2013 10:45 | 0.215208034 | 10/20/2013 2:00 | 0 |
| 10/29/2013 11:00 | 0.215208034 | 10/20/2013 2:10 | 0 |
| 10/29/2013 11:15 | 0.209544665 | 10/20/2013 2:20 | 0 |
| 10/29/2013 11:30 | 0.209544665 | 10/20/2013 2:30 | 0 |
| 10/29/2013 11:45 | 0.209544665 | 10/20/2013 2:40 | 0 |
| 10/29/2013 12:00 | 0.203881296 | 10/20/2013 2:50 | 0 |
| 10/29/2013 12:15 | 0.201049611 | 10/20/2013 3:00 | 0 |
| 10/29/2013 12:30 | 0.189722872 | 10/20/2013 3:10 | 0 |
| 10/29/2013 12:45 | 0.189722872 | 10/20/2013 3:20 | 0 |
| 10/29/2013 13:00 | 0.203881296 | 10/20/2013 3:30 | 0 |
| 10/29/2013 13:15 | 0.203881296 | 10/20/2013 3:40 | 0 |
| 10/29/2013 13:30 | 0.201049611 | 10/20/2013 3:50 | 0 |
| 10/29/2013 13:45 | 0.201049611 | 10/20/2013 4:00 | 0 |
| 10/29/2013 14:00 | 0.189722872 | 10/20/2013 4:10 | 0 |
| 10/29/2013 14:15 | 0.195386242 | 10/20/2013 4:20 | 0 |
| 10/29/2013 14:30 | 0.195386242 | 10/20/2013 4:30 | 0 |
| 10/29/2013 14:45 | 0.195386242 | 10/20/2013 4:40 | 0 |
| 10/29/2013 15:00 | 0.195386242 | 10/20/2013 4:50 | 0 |
| 10/29/2013 15:15 | 0.195386242 | 10/20/2013 5:00 | 0 |
| 10/29/2013 15:30 | 0.189722872 | 10/20/2013 5:10 | 0 |
| 10/29/2013 15:45 | 0.189722872 | 10/20/2013 5:20 | 0 |
| 10/29/2013 16:00 | 0.189722872 | 10/20/2013 5:30 | 0 |
| 10/29/2013 16:15 | 0.186891188 | 10/20/2013 5:40 | 0 |
| 10/29/2013 16:30 | 0.189722872 | 10/20/2013 5:50 | 0 |
| 10/29/2013 16:45 | 0.186891188 | 10/20/2013 6:00 | 0 |
| 10/29/2013 17:00 | 0.186891188 | 10/20/2013 6:10 | 0 |
| 10/29/2013 17:15 | 0.186891188 | 10/20/2013 6:20 | 0 |
| 10/29/2013 17:30 | 0.186891188 | 10/20/2013 6:30 | 0 |
| 10/29/2013 17:45 | 0.186891188 | 10/20/2013 6:40 | 0 |
| 10/29/2013 18:00 | 0.186891188 | 10/20/2013 6:50 | 0 |
| 10/29/2013 18:15 | 0.186891188 | 10/20/2013 7:00 | 0 |
| 10/29/2013 18:30 | 0.189722872 | 10/20/2013 7:10 | 0 |
| 10/29/2013 18:45 | 0.186891188 | 10/20/2013 7:20 | 0 |
| 10/29/2013 19:00 | 0.189722872 | 10/20/2013 7:30 | 0 |
| 10/29/2013 19:15 | 0.189722872 | 10/20/2013 7:40 | 0 |
| 10/29/2013 19:30 | 0.189722872 | 10/20/2013 7:50 | 0 |
| 10/29/2013 19:45 | 0.195386242 | 10/20/2013 8:00 | 0 |
| 10/29/2013 20:00 | 0.195386242 | 10/20/2013 8:10 | 0 |
| 10/29/2013 20:15 | 0.195386242 | 10/20/2013 8:20 | 0 |
| 10/29/2013 20:30 | 0.201049611 | 10/20/2013 8:30 | 0 |
| 10/29/2013 20:45 | 0.201049611 | 10/20/2013 8:40 | 0 |
| 10/29/2013 21:00 | 0.201049611 | 10/20/2013 8:50 | 0 |
| 10/29/2013 21:15 | 0.201049611 | 10/20/2013 9:00 | 0 |
| 10/29/2013 21:30 | 0.203881296 | 10/20/2013 9:10 | 0 |
| 10/29/2013 21:45 | 0.203881296 | 10/20/2013 9:20 | 0 |
| 10/29/2013 22:00 | 0.203881296 | 10/20/2013 9:30 | 0 |

|                  |             |                  |   |
|------------------|-------------|------------------|---|
| 10/29/2013 22:15 | 0.203881296 | 10/20/2013 9:40  | 0 |
| 10/29/2013 22:30 | 0.209544665 | 10/20/2013 9:50  | 0 |
| 10/29/2013 22:45 | 0.209544665 | 10/20/2013 10:00 | 0 |
| 10/29/2013 23:00 | 0.215208034 | 10/20/2013 10:10 | 0 |
| 10/29/2013 23:15 | 0.215208034 | 10/20/2013 10:20 | 0 |
| 10/29/2013 23:30 | 0.215208034 | 10/20/2013 10:30 | 0 |
| 10/29/2013 23:45 | 0.209544665 | 10/20/2013 10:40 | 0 |
| 10/30/2013 0:00  | 0.209544665 | 10/20/2013 10:50 | 0 |
| 10/30/2013 0:15  | 0.203881296 | 10/20/2013 11:00 | 0 |
| 10/30/2013 0:30  | 0.201049611 | 10/20/2013 11:10 | 0 |
| 10/30/2013 0:45  | 0.201049611 | 10/20/2013 11:20 | 0 |
| 10/30/2013 1:00  | 0.195386242 | 10/20/2013 11:30 | 0 |
| 10/30/2013 1:15  | 0.189722872 | 10/20/2013 11:40 | 0 |
| 10/30/2013 1:30  | 0.186891188 | 10/20/2013 11:50 | 0 |
| 10/30/2013 1:45  | 0.186891188 | 10/20/2013 12:00 | 0 |
| 10/30/2013 2:00  | 0.181227818 | 10/20/2013 12:10 | 0 |
| 10/30/2013 2:15  | 0.178396134 | 10/20/2013 12:20 | 0 |
| 10/30/2013 2:30  | 0.172732764 | 10/20/2013 12:30 | 0 |
| 10/30/2013 2:45  | 0.172732764 | 10/20/2013 12:40 | 0 |
| 10/30/2013 3:00  | 0.16990108  | 10/20/2013 12:50 | 0 |
| 10/30/2013 3:15  | 0.16423771  | 10/20/2013 13:00 | 0 |
| 10/30/2013 3:30  | 0.161406026 | 10/20/2013 13:10 | 0 |
| 10/30/2013 3:45  | 0.161406026 | 10/20/2013 13:20 | 0 |
| 10/30/2013 4:00  | 0.161406026 | 10/20/2013 13:30 | 0 |
| 10/30/2013 4:15  | 0.161406026 | 10/20/2013 13:40 | 0 |
| 10/30/2013 4:30  | 0.155742656 | 10/20/2013 13:50 | 0 |
| 10/30/2013 4:45  | 0.155742656 | 10/20/2013 14:00 | 0 |
| 10/30/2013 5:00  | 0.161406026 | 10/20/2013 14:10 | 0 |
| 10/30/2013 5:15  | 0.155742656 | 10/20/2013 14:20 | 0 |
| 10/30/2013 5:30  | 0.155742656 | 10/20/2013 14:30 | 0 |
| 10/30/2013 5:45  | 0.155742656 | 10/20/2013 14:40 | 0 |
| 10/30/2013 6:00  | 0.155742656 | 10/20/2013 14:50 | 0 |
| 10/30/2013 6:15  | 0.152910972 | 10/20/2013 15:00 | 0 |
| 10/30/2013 6:30  | 0.155742656 | 10/20/2013 15:10 | 0 |
| 10/30/2013 6:45  | 0.155742656 | 10/20/2013 15:20 | 0 |
| 10/30/2013 7:00  | 0.155742656 | 10/20/2013 15:30 | 0 |
| 10/30/2013 7:15  | 0.161406026 | 10/20/2013 15:40 | 0 |
| 10/30/2013 7:30  | 0.161406026 | 10/20/2013 15:50 | 0 |
| 10/30/2013 7:45  | 0.16423771  | 10/20/2013 16:00 | 0 |
| 10/30/2013 8:00  | 0.172732764 | 10/20/2013 16:10 | 0 |
| 10/30/2013 8:15  | 0.181227818 | 10/20/2013 16:20 | 0 |
| 10/30/2013 8:30  | 0.186891188 | 10/20/2013 16:30 | 0 |
| 10/30/2013 8:45  | 0.195386242 | 10/20/2013 16:40 | 0 |
| 10/30/2013 9:00  | 0.203881296 | 10/20/2013 16:50 | 0 |
| 10/30/2013 9:15  | 0.203881296 | 10/20/2013 17:00 | 0 |
| 10/30/2013 9:30  | 0.209544665 | 10/20/2013 17:10 | 0 |
| 10/30/2013 9:45  | 0.215208034 | 10/20/2013 17:20 | 0 |

|                  |             |                  |   |
|------------------|-------------|------------------|---|
| 10/30/2013 10:00 | 0.215208034 | 10/20/2013 17:30 | 0 |
| 10/30/2013 10:15 | 0.223703088 | 10/20/2013 17:40 | 0 |
| 10/30/2013 10:30 | 0.223703088 | 10/20/2013 17:50 | 0 |
| 10/30/2013 10:45 | 0.223703088 | 10/20/2013 18:00 | 0 |
| 10/30/2013 11:00 | 0.223703088 | 10/20/2013 18:10 | 0 |
| 10/30/2013 11:15 | 0.223703088 | 10/20/2013 18:20 | 0 |
| 10/30/2013 11:30 | 0.229366457 | 10/20/2013 18:30 | 0 |
| 10/30/2013 11:45 | 0.229366457 | 10/20/2013 18:40 | 0 |
| 10/30/2013 12:00 | 0.24918825  | 10/20/2013 18:50 | 0 |
| 10/30/2013 12:15 | 0.368119006 | 10/20/2013 19:00 | 0 |
| 10/30/2013 12:30 | 0.538020085 | 10/20/2013 19:10 | 0 |
| 10/30/2013 12:45 | 0.764554858 | 10/20/2013 19:20 | 0 |
| 10/30/2013 13:00 | 0.906139091 | 10/20/2013 19:30 | 0 |
| 10/30/2013 13:15 | 1.019406478 | 10/20/2013 19:40 | 0 |
| 10/30/2013 13:30 | 1.132673864 | 10/20/2013 19:50 | 0 |
| 10/30/2013 13:45 | 1.302574944 | 10/20/2013 20:00 | 0 |
| 10/30/2013 14:00 | 1.41584233  | 10/20/2013 20:10 | 0 |
| 10/30/2013 14:15 | 1.529109716 | 10/20/2013 20:20 | 0 |
| 10/30/2013 14:30 | 1.58574341  | 10/20/2013 20:30 | 0 |
| 10/30/2013 14:45 | 1.642377103 | 10/20/2013 20:40 | 0 |
| 10/30/2013 15:00 | 1.670693949 | 10/20/2013 20:50 | 0 |
| 10/30/2013 15:15 | 1.614060256 | 10/20/2013 21:00 | 0 |
| 10/30/2013 15:30 | 1.50079287  | 10/20/2013 21:10 | 0 |
| 10/30/2013 15:45 | 1.444159177 | 10/20/2013 21:20 | 0 |
| 10/30/2013 16:00 | 1.359208637 | 10/20/2013 21:30 | 0 |
| 10/30/2013 16:15 | 1.274258097 | 10/20/2013 21:40 | 0 |
| 10/30/2013 16:30 | 1.160990711 | 10/20/2013 21:50 | 0 |
| 10/30/2013 16:45 | 1.076040171 | 10/20/2013 22:00 | 0 |
| 10/30/2013 17:00 | 0.991089631 | 10/20/2013 22:10 | 0 |
| 10/30/2013 17:15 | 0.934455938 | 10/20/2013 22:20 | 0 |
| 10/30/2013 17:30 | 0.877822245 | 10/20/2013 22:30 | 0 |
| 10/30/2013 17:45 | 0.821188551 | 10/20/2013 22:40 | 0 |
| 10/30/2013 18:00 | 0.792871705 | 10/20/2013 22:50 | 0 |
| 10/30/2013 18:15 | 0.764554858 | 10/20/2013 23:00 | 0 |
| 10/30/2013 18:30 | 0.764554858 | 10/20/2013 23:10 | 0 |
| 10/30/2013 18:45 | 0.736238012 | 10/20/2013 23:20 | 0 |
| 10/30/2013 19:00 | 0.707921165 | 10/20/2013 23:30 | 0 |
| 10/30/2013 19:15 | 0.679604318 | 10/20/2013 23:40 | 0 |
| 10/30/2013 19:30 | 0.651287472 | 10/20/2013 23:50 | 0 |
| 10/30/2013 19:45 | 0.622970625 | 10/21/2013 0:00  | 0 |
| 10/30/2013 20:00 | 0.622970625 | 10/21/2013 0:10  | 0 |
| 10/30/2013 20:15 | 0.594653779 | 10/21/2013 0:20  | 0 |
| 10/30/2013 20:30 | 0.566336932 | 10/21/2013 0:30  | 0 |
| 10/30/2013 20:45 | 0.566336932 | 10/21/2013 0:40  | 0 |
| 10/30/2013 21:00 | 0.538020085 | 10/21/2013 0:50  | 0 |
| 10/30/2013 21:15 | 0.509703239 | 10/21/2013 1:00  | 0 |
| 10/30/2013 21:30 | 0.509703239 | 10/21/2013 1:10  | 0 |

|                  |             |                 |   |
|------------------|-------------|-----------------|---|
| 10/30/2013 21:45 | 0.509703239 | 10/21/2013 1:20 | 0 |
| 10/30/2013 22:00 | 0.481386392 | 10/21/2013 1:30 | 0 |
| 10/30/2013 22:15 | 0.481386392 | 10/21/2013 1:40 | 0 |
| 10/30/2013 22:30 | 0.453069546 | 10/21/2013 1:50 | 0 |
| 10/30/2013 22:45 | 0.453069546 | 10/21/2013 2:00 | 0 |
| 10/30/2013 23:00 | 0.424752699 | 10/21/2013 2:10 | 0 |
| 10/30/2013 23:15 | 0.424752699 | 10/21/2013 2:30 | 0 |
| 10/30/2013 23:30 | 0.424752699 | 10/21/2013 2:40 | 0 |
| 10/30/2013 23:45 | 0.396435852 | 10/21/2013 2:50 | 0 |
| 10/31/2013 0:00  | 0.396435852 | 10/21/2013 3:00 | 0 |
| 10/31/2013 0:15  | 0.396435852 | 10/21/2013 3:10 | 0 |
| 10/31/2013 0:30  | 0.396435852 | 10/21/2013 3:20 | 0 |
| 10/31/2013 0:45  | 0.368119006 | 10/21/2013 3:30 | 0 |
| 10/31/2013 1:00  | 0.368119006 | 10/21/2013 3:40 | 0 |
| 10/31/2013 1:15  | 0.368119006 | 10/21/2013 3:50 | 0 |
| 10/31/2013 1:30  | 0.339802159 | 10/21/2013 4:00 | 0 |
| 10/31/2013 1:45  | 0.339802159 | 10/21/2013 4:10 | 0 |
| 10/31/2013 2:00  | 0.311485313 | 10/21/2013 4:20 | 0 |
| 10/31/2013 2:15  | 0.311485313 | 10/21/2013 4:30 | 0 |
| 10/31/2013 2:30  | 0.311485313 | 10/21/2013 4:40 | 0 |
| 10/31/2013 2:45  | 0.311485313 | 10/21/2013 4:50 | 0 |
| 10/31/2013 3:00  | 0.311485313 | 10/21/2013 5:00 | 0 |
| 10/31/2013 3:15  | 0.311485313 | 10/21/2013 5:10 | 0 |
| 10/31/2013 3:30  | 0.283168466 | 10/21/2013 5:20 | 0 |
| 10/31/2013 3:45  | 0.283168466 | 10/21/2013 5:30 | 0 |
| 10/31/2013 4:00  | 0.283168466 | 10/21/2013 5:40 | 0 |
| 10/31/2013 4:15  | 0.283168466 | 10/21/2013 5:50 | 0 |
| 10/31/2013 4:30  | 0.277505097 | 10/21/2013 6:00 | 0 |
| 10/31/2013 4:45  | 0.271841727 | 10/21/2013 6:10 | 0 |
| 10/31/2013 5:00  | 0.266178358 | 10/21/2013 6:20 | 0 |
| 10/31/2013 5:15  | 0.266178358 | 10/21/2013 6:30 | 0 |
| 10/31/2013 5:30  | 0.266178358 | 10/21/2013 6:40 | 0 |
| 10/31/2013 5:45  | 0.260514989 | 10/21/2013 6:50 | 0 |
| 10/31/2013 6:00  | 0.260514989 | 10/21/2013 7:00 | 0 |
| 10/31/2013 6:15  | 0.260514989 | 10/21/2013 7:10 | 0 |
| 10/31/2013 6:30  | 0.254851619 | 10/21/2013 7:20 | 0 |
| 10/31/2013 6:45  | 0.254851619 | 10/21/2013 7:30 | 0 |
| 10/31/2013 7:00  | 0.254851619 | 10/21/2013 7:40 | 0 |
| 10/31/2013 7:15  | 0.254851619 | 10/21/2013 7:50 | 0 |
| 10/31/2013 7:30  | 0.254851619 | 10/21/2013 8:00 | 0 |
| 10/31/2013 7:45  | 0.260514989 | 10/21/2013 8:10 | 0 |
| 10/31/2013 8:00  | 0.266178358 | 10/21/2013 8:20 | 0 |
| 10/31/2013 8:15  | 0.271841727 | 10/21/2013 8:30 | 0 |
| 10/31/2013 8:30  | 0.271841727 | 10/21/2013 8:40 | 0 |
| 10/31/2013 8:45  | 0.283168466 | 10/21/2013 8:50 | 0 |
| 10/31/2013 9:00  | 0.283168466 | 10/21/2013 9:00 | 0 |
| 10/31/2013 9:15  | 0.311485313 | 10/21/2013 9:10 | 0 |

|                  |             |                  |   |
|------------------|-------------|------------------|---|
| 10/31/2013 9:30  | 0.311485313 | 10/21/2013 9:20  | 0 |
| 10/31/2013 9:45  | 0.311485313 | 10/21/2013 9:30  | 0 |
| 10/31/2013 10:00 | 0.311485313 | 10/21/2013 9:40  | 0 |
| 10/31/2013 10:15 | 0.311485313 | 10/21/2013 9:50  | 0 |
| 10/31/2013 10:30 | 0.283168466 | 10/21/2013 10:00 | 0 |
| 10/31/2013 10:45 | 0.283168466 | 10/21/2013 10:10 | 0 |
| 10/31/2013 11:00 | 0.283168466 | 10/21/2013 10:20 | 0 |
| 10/31/2013 11:15 | 0.283168466 | 10/21/2013 10:30 | 0 |
| 10/31/2013 11:30 | 0.283168466 | 10/21/2013 10:40 | 0 |
| 10/31/2013 11:45 | 0.283168466 | 10/21/2013 10:50 | 0 |
| 10/31/2013 12:00 | 0.283168466 | 10/21/2013 11:00 | 0 |
| 10/31/2013 12:15 | 0.271841727 | 10/21/2013 11:10 | 0 |
| 10/31/2013 12:30 | 0.271841727 | 10/21/2013 11:20 | 0 |
| 10/31/2013 12:45 | 0.266178358 | 10/21/2013 11:30 | 0 |
| 10/31/2013 13:00 | 0.266178358 | 10/21/2013 11:40 | 0 |
| 10/31/2013 13:15 | 0.266178358 | 10/21/2013 11:50 | 0 |
| 10/31/2013 13:30 | 0.266178358 | 10/21/2013 12:00 | 0 |
| 10/31/2013 13:45 | 0.260514989 | 10/21/2013 12:10 | 0 |
| 10/31/2013 14:00 | 0.266178358 | 10/21/2013 12:20 | 0 |
| 10/31/2013 14:15 | 0.260514989 | 10/21/2013 12:30 | 0 |
| 10/31/2013 14:30 | 0.260514989 | 10/21/2013 12:40 | 0 |
| 10/31/2013 14:45 | 0.254851619 | 10/21/2013 12:50 | 0 |
| 10/31/2013 15:00 | 0.254851619 | 10/21/2013 13:00 | 0 |
| 10/31/2013 15:15 | 0.254851619 | 10/21/2013 13:10 | 0 |
| 10/31/2013 15:30 | 0.254851619 | 10/21/2013 13:20 | 0 |
| 10/31/2013 15:45 | 0.24918825  | 10/21/2013 13:30 | 0 |
| 10/31/2013 16:00 | 0.24918825  | 10/21/2013 13:40 | 0 |
| 10/31/2013 16:15 | 0.243524881 | 10/21/2013 13:50 | 0 |
| 10/31/2013 16:30 | 0.24918825  | 10/21/2013 14:00 | 0 |
| 10/31/2013 16:45 | 0.24918825  | 10/21/2013 14:10 | 0 |
| 10/31/2013 17:00 | 0.243524881 | 10/21/2013 14:20 | 0 |
| 10/31/2013 17:15 | 0.243524881 | 10/21/2013 14:30 | 0 |
| 10/31/2013 17:30 | 0.240693196 | 10/21/2013 14:40 | 0 |
| 10/31/2013 17:45 | 0.243524881 | 10/21/2013 14:50 | 0 |
| 10/31/2013 18:00 | 0.243524881 | 10/21/2013 15:00 | 0 |
| 10/31/2013 18:15 | 0.243524881 | 10/21/2013 15:10 | 0 |
| 10/31/2013 18:30 | 0.243524881 | 10/21/2013 15:20 | 0 |
| 10/31/2013 18:45 | 0.240693196 | 10/21/2013 15:30 | 0 |
| 10/31/2013 19:00 | 0.243524881 | 10/21/2013 15:40 | 0 |
| 10/31/2013 19:15 | 0.243524881 | 10/21/2013 15:50 | 0 |
| 10/31/2013 19:30 | 0.243524881 | 10/21/2013 16:00 | 0 |
| 10/31/2013 19:45 | 0.243524881 | 10/21/2013 16:10 | 0 |
| 10/31/2013 20:00 | 0.24918825  | 10/21/2013 16:20 | 0 |
| 10/31/2013 20:15 | 0.24918825  | 10/21/2013 16:30 | 0 |
| 10/31/2013 20:30 | 0.24918825  | 10/21/2013 16:40 | 0 |
| 10/31/2013 20:45 | 0.24918825  | 10/21/2013 16:50 | 0 |
| 10/31/2013 21:00 | 0.254851619 | 10/21/2013 17:00 | 0 |

|                  |             |                  |   |
|------------------|-------------|------------------|---|
| 10/31/2013 21:15 | 0.254851619 | 10/21/2013 17:10 | 0 |
| 10/31/2013 21:30 | 0.254851619 | 10/21/2013 17:20 | 0 |
| 10/31/2013 21:45 | 0.254851619 | 10/21/2013 17:30 | 0 |
| 10/31/2013 22:00 | 0.260514989 | 10/21/2013 17:40 | 0 |
| 10/31/2013 22:15 | 0.260514989 | 10/21/2013 17:50 | 0 |
| 10/31/2013 22:30 | 0.260514989 | 10/21/2013 18:00 | 0 |
| 10/31/2013 22:45 | 0.260514989 | 10/21/2013 18:10 | 0 |
| 10/31/2013 23:00 | 0.260514989 | 10/21/2013 18:20 | 0 |
| 10/31/2013 23:15 | 0.266178358 | 10/21/2013 18:30 | 0 |
| 10/31/2013 23:30 | 0.266178358 | 10/21/2013 18:40 | 0 |
| 10/31/2013 23:45 | 0.266178358 | 10/21/2013 18:50 | 0 |
| 11/1/2013 0:00   | 0.260514989 | 10/21/2013 19:00 | 0 |
| 11/1/2013 0:15   | 0.260514989 | 10/21/2013 19:10 | 0 |
| 11/1/2013 0:30   | 0.254851619 | 10/21/2013 19:20 | 0 |
| 11/1/2013 0:45   | 0.254851619 | 10/21/2013 19:30 | 0 |
| 11/1/2013 1:00   | 0.24918825  | 10/21/2013 19:40 | 0 |
| 11/1/2013 1:15   | 0.24918825  | 10/21/2013 19:50 | 0 |
| 11/1/2013 1:30   | 0.243524881 | 10/21/2013 20:00 | 0 |
| 11/1/2013 1:45   | 0.240693196 | 10/21/2013 20:10 | 0 |
| 11/1/2013 2:00   | 0.235029827 | 10/21/2013 20:20 | 0 |
| 11/1/2013 2:15   | 0.229366457 | 10/21/2013 20:30 | 0 |
| 11/1/2013 2:30   | 0.229366457 | 10/21/2013 20:40 | 0 |
| 11/1/2013 2:45   | 0.223703088 | 10/21/2013 20:50 | 0 |
| 11/1/2013 3:00   | 0.218039719 | 10/21/2013 21:00 | 0 |
| 11/1/2013 3:15   | 0.218039719 | 10/21/2013 21:10 | 0 |
| 11/1/2013 3:30   | 0.215208034 | 10/21/2013 21:20 | 0 |
| 11/1/2013 3:45   | 0.215208034 | 10/21/2013 21:30 | 0 |
| 11/1/2013 4:00   | 0.215208034 | 10/21/2013 21:40 | 0 |
| 11/1/2013 4:15   | 0.209544665 | 10/21/2013 21:50 | 0 |
| 11/1/2013 4:30   | 0.209544665 | 10/21/2013 22:00 | 0 |
| 11/1/2013 4:45   | 0.209544665 | 10/21/2013 22:10 | 0 |
| 11/1/2013 5:00   | 0.209544665 | 10/21/2013 22:20 | 0 |
| 11/1/2013 5:15   | 0.209544665 | 10/21/2013 22:30 | 0 |
| 11/1/2013 5:30   | 0.203881296 | 10/21/2013 22:40 | 0 |
| 11/1/2013 5:45   | 0.209544665 | 10/21/2013 22:50 | 0 |
| 11/1/2013 6:00   | 0.203881296 | 10/21/2013 23:00 | 0 |
| 11/1/2013 6:15   | 0.203881296 | 10/21/2013 23:10 | 0 |
| 11/1/2013 6:30   | 0.203881296 | 10/21/2013 23:20 | 0 |
| 11/1/2013 6:45   | 0.203881296 | 10/21/2013 23:30 | 0 |
| 11/1/2013 7:00   | 0.203881296 | 10/21/2013 23:40 | 0 |
| 11/1/2013 7:15   | 0.209544665 | 10/21/2013 23:50 | 0 |
| 11/1/2013 7:30   | 0.215208034 | 10/22/2013 0:00  | 0 |
| 11/1/2013 7:45   | 0.215208034 | 10/22/2013 0:10  | 0 |
| 11/1/2013 8:00   | 0.215208034 | 10/22/2013 0:20  | 0 |
| 11/1/2013 8:15   | 0.218039719 | 10/22/2013 0:30  | 0 |
| 11/1/2013 8:30   | 0.229366457 | 10/22/2013 0:40  | 0 |
| 11/1/2013 8:45   | 0.235029827 | 10/22/2013 0:50  | 0 |



|                 |             |                 |        |
|-----------------|-------------|-----------------|--------|
| 11/1/2013 9:00  | 0.240693196 | 10/22/2013 1:00 | 0      |
| 11/1/2013 9:15  | 0.243524881 | 10/22/2013 1:10 | 0      |
| 11/1/2013 9:30  | 0.243524881 | 10/22/2013 1:20 | 0      |
| 11/1/2013 9:45  | 0.243524881 | 10/22/2013 1:30 | 0      |
| 11/1/2013 10:00 | 0.240693196 | 10/22/2013 1:40 | 0      |
| 11/1/2013 10:15 | 0.243524881 | 10/22/2013 1:50 | 0      |
| 11/1/2013 10:30 | 0.24918825  | 10/22/2013 2:00 | 0      |
| 11/1/2013 10:45 | 0.24918825  | 10/22/2013 2:10 | 0      |
| 11/1/2013 11:00 | 0.243524881 | 10/22/2013 2:20 | 0      |
| 11/1/2013 11:15 | 0.243524881 | 10/22/2013 2:30 | 0      |
| 11/1/2013 11:30 | 0.240693196 | 10/22/2013 2:40 | 0      |
| 11/1/2013 11:45 | 0.235029827 | 10/22/2013 2:50 | 0      |
| 11/1/2013 12:00 | 0.235029827 | 10/22/2013 3:00 | 0      |
| 11/1/2013 12:15 | 0.229366457 | 10/22/2013 3:10 | 0      |
| 11/1/2013 12:30 | 0.223703088 | 10/22/2013 3:20 | 0.0254 |
| 11/1/2013 12:45 | 0.235029827 | 10/22/2013 3:30 | 0.0254 |
| 11/1/2013 13:00 | 0.229366457 | 10/22/2013 3:40 | 0.0508 |
| 11/1/2013 13:15 | 0.229366457 | 10/22/2013 3:50 | 0.0508 |
| 11/1/2013 13:30 | 0.229366457 | 10/22/2013 4:00 | 0.0508 |
| 11/1/2013 13:45 | 0.223703088 | 10/22/2013 4:10 | 0.0508 |
| 11/1/2013 14:00 | 0.223703088 | 10/22/2013 4:20 | 0.0508 |
| 11/1/2013 14:15 | 0.218039719 | 10/22/2013 4:30 | 0.0508 |
| 11/1/2013 14:30 | 0.223703088 | 10/22/2013 4:40 | 0.0508 |
| 11/1/2013 14:45 | 0.223703088 | 10/22/2013 4:50 | 0.0508 |
| 11/1/2013 15:00 | 0.218039719 | 10/22/2013 5:00 | 0.0508 |
| 11/1/2013 15:15 | 0.218039719 | 10/22/2013 5:10 | 0.0508 |
| 11/1/2013 15:30 | 0.218039719 | 10/22/2013 5:20 | 0.0508 |
| 11/1/2013 15:45 | 0.218039719 | 10/22/2013 5:30 | 0.0508 |
| 11/1/2013 16:00 | 0.218039719 | 10/22/2013 5:40 | 0.0508 |
| 11/1/2013 16:15 | 0.218039719 | 10/22/2013 5:50 | 0.0508 |
| 11/1/2013 16:30 | 0.215208034 | 10/22/2013 6:00 | 0.0508 |
| 11/1/2013 16:45 | 0.209544665 | 10/22/2013 6:10 | 0.0508 |
| 11/1/2013 17:00 | 0.209544665 | 10/22/2013 6:20 | 0.0508 |
| 11/1/2013 17:15 | 0.203881296 | 10/22/2013 6:30 | 0.0508 |
| 11/1/2013 17:30 | 0.209544665 | 10/22/2013 6:40 | 0.0508 |
| 11/1/2013 17:45 | 0.203881296 | 10/22/2013 6:50 | 0.0508 |
| 11/1/2013 18:00 | 0.209544665 | 10/22/2013 7:00 | 0.0508 |
| 11/1/2013 18:15 | 0.209544665 | 10/22/2013 7:10 | 0.0508 |
| 11/1/2013 18:30 | 0.209544665 | 10/22/2013 7:20 | 0.0508 |
| 11/1/2013 18:45 | 0.209544665 | 10/22/2013 7:30 | 0.0508 |
| 11/1/2013 19:00 | 0.215208034 | 10/22/2013 7:40 | 0.0508 |
| 11/1/2013 19:15 | 0.215208034 | 10/22/2013 7:50 | 0.0508 |
| 11/1/2013 19:30 | 0.215208034 | 10/22/2013 8:00 | 0.0508 |
| 11/1/2013 19:45 | 0.209544665 | 10/22/2013 8:10 | 0.0508 |
| 11/1/2013 20:00 | 0.209544665 | 10/22/2013 8:20 | 0.0508 |
| 11/1/2013 20:15 | 0.209544665 | 10/22/2013 8:30 | 0.0508 |
| 11/1/2013 20:30 | 0.215208034 | 10/22/2013 8:40 | 0.0508 |

|                 |             |                  |        |
|-----------------|-------------|------------------|--------|
| 11/1/2013 20:45 | 0.215208034 | 10/22/2013 8:50  | 0.0508 |
| 11/1/2013 21:00 | 0.215208034 | 10/22/2013 9:00  | 0.0508 |
| 11/1/2013 21:15 | 0.209544665 | 10/22/2013 9:10  | 0.0762 |
| 11/1/2013 21:30 | 0.215208034 | 10/22/2013 9:20  | 0.0762 |
| 11/1/2013 21:45 | 0.209544665 | 10/22/2013 9:30  | 0.0762 |
| 11/1/2013 22:00 | 0.215208034 | 10/22/2013 9:40  | 0.0762 |
| 11/1/2013 22:15 | 0.209544665 | 10/22/2013 9:50  | 0.0762 |
| 11/1/2013 22:30 | 0.209544665 | 10/22/2013 10:00 | 0.0762 |
| 11/1/2013 22:45 | 0.209544665 | 10/22/2013 10:10 | 0.0762 |
| 11/1/2013 23:00 | 0.209544665 | 10/22/2013 10:20 | 0.0762 |
| 11/1/2013 23:15 | 0.209544665 | 10/22/2013 10:30 | 0.0762 |
| 11/1/2013 23:30 | 0.209544665 | 10/22/2013 10:40 | 0.0762 |
| 11/1/2013 23:45 | 0.209544665 | 10/22/2013 10:50 | 0.0762 |
| 11/2/2013 0:00  | 0.203881296 | 10/22/2013 11:00 | 0.0762 |
| 11/2/2013 0:15  | 0.203881296 | 10/22/2013 11:10 | 0.1016 |
| 11/2/2013 0:30  | 0.201049611 | 10/22/2013 11:20 | 0.1016 |
| 11/2/2013 0:45  | 0.203881296 | 10/22/2013 11:30 | 0.1016 |
| 11/2/2013 1:00  | 0.201049611 | 10/22/2013 11:40 | 0.1016 |
| 11/2/2013 1:15  | 0.201049611 | 10/22/2013 11:50 | 0.127  |
| 11/2/2013 1:30  | 0.195386242 | 10/22/2013 12:00 | 0.127  |
| 11/2/2013 1:45  | 0.189722872 | 10/22/2013 12:10 | 0.127  |
| 11/2/2013 2:00  | 0.186891188 | 10/22/2013 12:20 | 0.1524 |
| 11/2/2013 2:15  | 0.186891188 | 10/22/2013 12:30 | 0.1524 |
| 11/2/2013 2:30  | 0.186891188 | 10/22/2013 12:40 | 0.1524 |
| 11/2/2013 2:45  | 0.181227818 | 10/22/2013 12:50 | 0.1524 |
| 11/2/2013 3:00  | 0.178396134 | 10/22/2013 13:00 | 0.1524 |
| 11/2/2013 3:15  | 0.178396134 | 10/22/2013 13:10 | 0.1778 |
| 11/2/2013 3:30  | 0.172732764 | 10/22/2013 13:20 | 0.1778 |
| 11/2/2013 3:45  | 0.172732764 | 10/22/2013 13:30 | 0.2032 |
| 11/2/2013 4:00  | 0.172732764 | 10/22/2013 13:40 | 0.2286 |
| 11/2/2013 4:15  | 0.16990108  | 10/22/2013 13:50 | 0.2286 |
| 11/2/2013 4:30  | 0.16990108  | 10/22/2013 14:00 | 0.2286 |
| 11/2/2013 4:45  | 0.16990108  | 10/22/2013 14:10 | 0.2286 |
| 11/2/2013 5:00  | 0.16423771  | 10/22/2013 14:20 | 0.2286 |
| 11/2/2013 5:15  | 0.16423771  | 10/22/2013 14:30 | 0.254  |
| 11/2/2013 5:30  | 0.16423771  | 10/22/2013 14:40 | 0.254  |
| 11/2/2013 5:45  | 0.16423771  | 10/22/2013 14:50 | 0.254  |
| 11/2/2013 6:00  | 0.16423771  | 10/22/2013 15:00 | 0.2794 |
| 11/2/2013 6:15  | 0.16423771  | 10/22/2013 15:10 | 0.2794 |
| 11/2/2013 6:30  | 0.16423771  | 10/22/2013 15:20 | 0.2794 |
| 11/2/2013 6:45  | 0.161406026 | 10/22/2013 15:30 | 0.2794 |
| 11/2/2013 7:00  | 0.161406026 | 10/22/2013 15:40 | 0.2794 |
| 11/2/2013 7:15  | 0.161406026 | 10/22/2013 15:50 | 0.2794 |
| 11/2/2013 7:30  | 0.161406026 | 10/22/2013 16:00 | 0.2794 |
| 11/2/2013 7:45  | 0.161406026 | 10/22/2013 16:10 | 0.2794 |
| 11/2/2013 8:00  | 0.161406026 | 10/22/2013 16:20 | 0.2794 |
| 11/2/2013 8:15  | 0.16423771  | 10/22/2013 16:30 | 0.2794 |

|                 |             |                  |        |
|-----------------|-------------|------------------|--------|
| 11/2/2013 8:30  | 0.161406026 | 10/22/2013 16:40 | 0.2794 |
| 11/2/2013 8:45  | 0.16990108  | 10/22/2013 16:50 | 0.2794 |
| 11/2/2013 9:00  | 0.16990108  | 10/22/2013 17:00 | 0.2794 |
| 11/2/2013 9:15  | 0.172732764 | 10/22/2013 17:10 | 0.2794 |
| 11/2/2013 9:30  | 0.172732764 | 10/22/2013 17:20 | 0.2794 |
| 11/2/2013 9:45  | 0.178396134 | 10/22/2013 17:30 | 0.2794 |
| 11/2/2013 10:00 | 0.181227818 | 10/22/2013 17:40 | 0.2794 |
| 11/2/2013 10:15 | 0.189722872 | 10/22/2013 17:50 | 0.2794 |
| 11/2/2013 10:30 | 0.189722872 | 10/22/2013 18:00 | 0.2794 |
| 11/2/2013 10:45 | 0.195386242 | 10/22/2013 18:10 | 0.2794 |
| 11/2/2013 11:00 | 0.203881296 | 10/22/2013 18:20 | 0.2794 |
| 11/2/2013 11:15 | 0.203881296 | 10/22/2013 18:30 | 0.2794 |
| 11/2/2013 11:30 | 0.209544665 | 10/22/2013 18:40 | 0.2794 |
| 11/2/2013 11:45 | 0.215208034 | 10/22/2013 18:50 | 0.2794 |
| 11/2/2013 12:00 | 0.209544665 | 10/22/2013 19:00 | 0.2794 |
| 11/2/2013 12:15 | 0.215208034 | 10/22/2013 19:10 | 0.2794 |
| 11/2/2013 12:30 | 0.218039719 | 10/22/2013 19:20 | 0.2794 |
| 11/2/2013 12:45 | 0.218039719 | 10/22/2013 19:30 | 0.2794 |
| 11/2/2013 13:00 | 0.218039719 | 10/22/2013 19:40 | 0.2794 |
| 11/2/2013 13:15 | 0.218039719 | 10/22/2013 19:50 | 0.2794 |
| 11/2/2013 13:30 | 0.218039719 | 10/22/2013 20:00 | 0.2794 |
| 11/2/2013 13:45 | 0.215208034 | 10/22/2013 20:10 | 0.2794 |
| 11/2/2013 14:00 | 0.218039719 | 10/22/2013 20:20 | 0.2794 |
| 11/2/2013 14:15 | 0.215208034 | 10/22/2013 20:30 | 0.2794 |
| 11/2/2013 14:30 | 0.215208034 | 10/22/2013 20:40 | 0.2794 |
| 11/2/2013 14:45 | 0.209544665 | 10/22/2013 20:50 | 0.2794 |
| 11/2/2013 15:00 | 0.209544665 | 10/22/2013 21:00 | 0.2794 |
| 11/2/2013 15:15 | 0.203881296 | 10/22/2013 21:10 | 0.2794 |
| 11/2/2013 15:30 | 0.203881296 | 10/22/2013 21:20 | 0.2794 |
| 11/2/2013 15:45 | 0.203881296 | 10/22/2013 21:30 | 0.2794 |
| 11/2/2013 16:00 | 0.203881296 | 10/22/2013 21:40 | 0.2794 |
| 11/2/2013 16:15 | 0.203881296 | 10/22/2013 21:50 | 0.2794 |
| 11/2/2013 16:30 | 0.201049611 | 10/22/2013 22:00 | 0.2794 |
| 11/2/2013 16:45 | 0.201049611 | 10/22/2013 22:10 | 0.2794 |
| 11/2/2013 17:00 | 0.201049611 | 10/22/2013 22:20 | 0.2794 |
| 11/2/2013 17:15 | 0.195386242 | 10/22/2013 22:30 | 0.2794 |
| 11/2/2013 17:30 | 0.195386242 | 10/22/2013 22:40 | 0.2794 |
| 11/2/2013 17:45 | 0.195386242 | 10/22/2013 22:50 | 0.2794 |
| 11/2/2013 18:00 | 0.195386242 | 10/22/2013 23:00 | 0.2794 |
| 11/2/2013 18:15 | 0.195386242 | 10/22/2013 23:10 | 0.2794 |
| 11/2/2013 18:30 | 0.195386242 | 10/22/2013 23:20 | 0.2794 |
| 11/2/2013 18:45 | 0.195386242 | 10/22/2013 23:30 | 0.2794 |
| 11/2/2013 19:00 | 0.195386242 | 10/22/2013 23:40 | 0.2794 |
| 11/2/2013 19:15 | 0.189722872 | 10/22/2013 23:50 | 0.2794 |
| 11/2/2013 19:30 | 0.189722872 | 10/23/2013 0:00  | 0.2794 |
| 11/2/2013 19:45 | 0.195386242 | 10/23/2013 0:10  | 0      |
| 11/2/2013 20:00 | 0.189722872 | 10/23/2013 0:20  | 0      |

|                 |             |                 |   |
|-----------------|-------------|-----------------|---|
| 11/2/2013 20:15 | 0.189722872 | 10/23/2013 0:30 | 0 |
| 11/2/2013 20:30 | 0.189722872 | 10/23/2013 0:40 | 0 |
| 11/2/2013 20:45 | 0.186891188 | 10/23/2013 0:50 | 0 |
| 11/2/2013 21:00 | 0.186891188 | 10/23/2013 1:00 | 0 |
| 11/2/2013 21:15 | 0.186891188 | 10/23/2013 1:10 | 0 |
| 11/2/2013 21:30 | 0.186891188 | 10/23/2013 1:20 | 0 |
| 11/2/2013 21:45 | 0.186891188 | 10/23/2013 1:30 | 0 |
| 11/2/2013 22:00 | 0.186891188 | 10/23/2013 1:40 | 0 |
| 11/2/2013 22:15 | 0.186891188 | 10/23/2013 1:50 | 0 |
| 11/2/2013 22:30 | 0.181227818 | 10/23/2013 2:00 | 0 |
| 11/2/2013 22:45 | 0.186891188 | 10/23/2013 2:10 | 0 |
| 11/2/2013 23:00 | 0.181227818 | 10/23/2013 2:20 | 0 |
| 11/2/2013 23:15 | 0.181227818 | 10/23/2013 2:30 | 0 |
| 11/2/2013 23:30 | 0.181227818 | 10/23/2013 2:40 | 0 |
| 11/2/2013 23:45 | 0.178396134 | 10/23/2013 2:50 | 0 |
| 11/3/2013 0:00  | 0.178396134 | 10/23/2013 3:00 | 0 |
| 11/3/2013 0:15  | 0.178396134 | 10/23/2013 3:10 | 0 |
| 11/3/2013 0:30  | 0.172732764 | 10/23/2013 3:20 | 0 |
| 11/3/2013 0:45  | 0.172732764 | 10/23/2013 3:30 | 0 |
| 11/3/2013 1:00  | 0.16990108  | 10/23/2013 3:40 | 0 |
| 11/3/2013 1:00  | 0.16423771  | 10/23/2013 3:50 | 0 |
| 11/3/2013 1:15  | 0.172732764 | 10/23/2013 4:00 | 0 |
| 11/3/2013 1:15  | 0.161406026 | 10/23/2013 4:10 | 0 |
| 11/3/2013 1:30  | 0.16990108  | 10/23/2013 4:20 | 0 |
| 11/3/2013 1:30  | 0.161406026 | 10/23/2013 4:30 | 0 |
| 11/3/2013 1:45  | 0.16990108  | 10/23/2013 4:40 | 0 |
| 11/3/2013 1:45  | 0.161406026 | 10/23/2013 4:50 | 0 |
| 11/3/2013 2:00  | 0.155742656 | 10/23/2013 5:00 | 0 |
| 11/3/2013 2:15  | 0.152910972 | 10/23/2013 5:10 | 0 |
| 11/3/2013 2:30  | 0.155742656 | 10/23/2013 5:20 | 0 |
| 11/3/2013 2:45  | 0.152910972 | 10/23/2013 5:30 | 0 |
| 11/3/2013 3:00  | 0.152910972 | 10/23/2013 5:40 | 0 |
| 11/3/2013 3:15  | 0.152910972 | 10/23/2013 5:50 | 0 |
| 11/3/2013 3:30  | 0.150079287 | 10/23/2013 6:00 | 0 |
| 11/3/2013 3:45  | 0.150079287 | 10/23/2013 6:10 | 0 |
| 11/3/2013 4:00  | 0.144415918 | 10/23/2013 6:20 | 0 |
| 11/3/2013 4:15  | 0.150079287 | 10/23/2013 6:30 | 0 |
| 11/3/2013 4:30  | 0.144415918 | 10/23/2013 6:40 | 0 |
| 11/3/2013 4:45  | 0.144415918 | 10/23/2013 6:50 | 0 |
| 11/3/2013 5:00  | 0.144415918 | 10/23/2013 7:00 | 0 |
| 11/3/2013 5:15  | 0.141584233 | 10/23/2013 7:10 | 0 |
| 11/3/2013 5:30  | 0.141584233 | 10/23/2013 7:20 | 0 |
| 11/3/2013 5:45  | 0.141584233 | 10/23/2013 7:30 | 0 |
| 11/3/2013 6:00  | 0.141584233 | 10/23/2013 7:40 | 0 |
| 11/3/2013 6:15  | 0.141584233 | 10/23/2013 7:50 | 0 |
| 11/3/2013 6:30  | 0.141584233 | 10/23/2013 8:00 | 0 |
| 11/3/2013 6:45  | 0.141584233 | 10/23/2013 8:10 | 0 |

|                 |             |                  |        |
|-----------------|-------------|------------------|--------|
| 11/3/2013 7:00  | 0.144415918 | 10/23/2013 8:20  | 0      |
| 11/3/2013 7:15  | 0.144415918 | 10/23/2013 8:30  | 0      |
| 11/3/2013 7:30  | 0.144415918 | 10/23/2013 8:40  | 0      |
| 11/3/2013 7:45  | 0.144415918 | 10/23/2013 8:50  | 0      |
| 11/3/2013 8:00  | 0.144415918 | 10/23/2013 9:00  | 0      |
| 11/3/2013 8:15  | 0.144415918 | 10/23/2013 9:10  | 0      |
| 11/3/2013 8:30  | 0.150079287 | 10/23/2013 9:20  | 0      |
| 11/3/2013 8:45  | 0.150079287 | 10/23/2013 9:30  | 0      |
| 11/3/2013 9:00  | 0.155742656 | 10/23/2013 9:40  | 0      |
| 11/3/2013 9:15  | 0.161406026 | 10/23/2013 9:50  | 0      |
| 11/3/2013 9:30  | 0.16990108  | 10/23/2013 10:10 | 0      |
| 11/3/2013 9:45  | 0.16990108  | 10/23/2013 10:20 | 0      |
| 11/3/2013 10:00 | 0.172732764 | 10/23/2013 10:30 | 0      |
| 11/3/2013 10:15 | 0.178396134 | 10/23/2013 10:40 | 0      |
| 11/3/2013 10:30 | 0.181227818 | 10/23/2013 10:50 | 0      |
| 11/3/2013 10:45 | 0.189722872 | 10/23/2013 11:00 | 0      |
| 11/3/2013 11:00 | 0.195386242 | 10/23/2013 11:10 | 0      |
| 11/3/2013 11:15 | 0.195386242 | 10/23/2013 11:20 | 0      |
| 11/3/2013 11:30 | 0.201049611 | 10/23/2013 11:30 | 0      |
| 11/3/2013 11:45 | 0.201049611 | 10/23/2013 11:40 | 0      |
| 11/3/2013 12:00 | 0.203881296 | 10/23/2013 11:50 | 0      |
| 11/3/2013 12:15 | 0.203881296 | 10/23/2013 12:00 | 0      |
| 11/3/2013 12:30 | 0.203881296 | 10/23/2013 12:10 | 0      |
| 11/3/2013 12:45 | 0.209544665 | 10/23/2013 12:20 | 0      |
| 11/3/2013 13:00 | 0.203881296 | 10/23/2013 12:30 | 0      |
| 11/3/2013 13:15 | 0.203881296 | 10/23/2013 12:40 | 0      |
| 11/3/2013 13:30 | 0.203881296 | 10/23/2013 12:50 | 0      |
| 11/3/2013 13:45 | 0.203881296 | 10/23/2013 13:00 | 0      |
| 11/3/2013 14:00 | 0.201049611 | 10/23/2013 13:10 | 0      |
| 11/3/2013 14:15 | 0.203881296 | 10/23/2013 13:20 | 0      |
| 11/3/2013 14:30 | 0.201049611 | 10/23/2013 13:30 | 0      |
| 11/3/2013 14:45 | 0.195386242 | 10/23/2013 13:40 | 0      |
| 11/3/2013 15:00 | 0.195386242 | 10/23/2013 13:50 | 0      |
| 11/3/2013 15:15 | 0.195386242 | 10/23/2013 14:00 | 0      |
| 11/3/2013 15:30 | 0.195386242 | 10/23/2013 14:10 | 0      |
| 11/3/2013 15:45 | 0.189722872 | 10/23/2013 14:20 | 0.0254 |
| 11/3/2013 16:00 | 0.189722872 | 10/23/2013 14:30 | 0.0254 |
| 11/3/2013 16:15 | 0.189722872 | 10/23/2013 14:40 | 0.0508 |
| 11/3/2013 16:30 | 0.189722872 | 10/23/2013 14:50 | 0.0508 |
| 11/3/2013 16:45 | 0.186891188 | 10/23/2013 15:00 | 0.0508 |
| 11/3/2013 17:00 | 0.186891188 | 10/23/2013 15:10 | 0.0508 |
| 11/3/2013 17:15 | 0.186891188 | 10/23/2013 15:20 | 0.0508 |
| 11/3/2013 17:30 | 0.186891188 | 10/23/2013 15:30 | 0.0508 |
| 11/3/2013 17:45 | 0.186891188 | 10/23/2013 15:40 | 0.0508 |
| 11/3/2013 18:00 | 0.186891188 | 10/23/2013 15:50 | 0.0508 |
| 11/3/2013 18:15 | 0.186891188 | 10/23/2013 16:00 | 0.0508 |
| 11/3/2013 18:30 | 0.186891188 | 10/23/2013 16:10 | 0.0508 |

|                 |             |                  |        |
|-----------------|-------------|------------------|--------|
| 11/3/2013 18:45 | 0.186891188 | 10/23/2013 16:20 | 0.0508 |
| 11/3/2013 19:00 | 0.186891188 | 10/23/2013 16:30 | 0.0508 |
| 11/3/2013 19:15 | 0.186891188 | 10/23/2013 16:40 | 0.0508 |
| 11/3/2013 19:30 | 0.186891188 | 10/23/2013 16:50 | 0.0508 |
| 11/3/2013 19:45 | 0.186891188 | 10/23/2013 17:00 | 0.0508 |
| 11/3/2013 20:00 | 0.189722872 | 10/23/2013 17:10 | 0.0508 |
| 11/3/2013 20:15 | 0.189722872 | 10/23/2013 17:20 | 0.0508 |
| 11/3/2013 20:30 | 0.189722872 | 10/23/2013 17:30 | 0.0508 |
| 11/3/2013 20:45 | 0.189722872 | 10/23/2013 17:40 | 0.0508 |
| 11/3/2013 21:00 | 0.189722872 | 10/23/2013 17:50 | 0.0508 |
| 11/3/2013 21:15 | 0.189722872 | 10/23/2013 18:00 | 0.0508 |
| 11/3/2013 21:30 | 0.195386242 | 10/23/2013 18:10 | 0.0508 |
| 11/3/2013 21:45 | 0.189722872 | 10/23/2013 18:20 | 0.0508 |
| 11/3/2013 22:00 | 0.189722872 | 10/23/2013 18:30 | 0.0508 |
| 11/3/2013 22:15 | 0.189722872 | 10/23/2013 18:40 | 0.0508 |
| 11/3/2013 22:30 | 0.189722872 | 10/23/2013 18:50 | 0.0508 |
| 11/3/2013 22:45 | 0.189722872 | 10/23/2013 19:00 | 0.0508 |
| 11/3/2013 23:00 | 0.186891188 | 10/23/2013 19:10 | 0.0508 |
| 11/3/2013 23:15 | 0.186891188 | 10/23/2013 19:20 | 0.0508 |
| 11/3/2013 23:30 | 0.181227818 | 10/23/2013 19:30 | 0.0508 |
| 11/3/2013 23:45 | 0.181227818 | 10/23/2013 19:40 | 0.0508 |
| 11/4/2013 0:00  | 0.172732764 | 10/23/2013 19:50 | 0.0762 |
| 11/4/2013 0:15  | 0.172732764 | 10/23/2013 20:00 | 0.0762 |
| 11/4/2013 0:30  | 0.16990108  | 10/23/2013 20:10 | 0.0762 |
| 11/4/2013 0:45  | 0.16423771  | 10/23/2013 20:20 | 0.0762 |
| 11/4/2013 1:00  | 0.16423771  | 10/23/2013 20:30 | 0.0762 |
| 11/4/2013 1:15  | 0.161406026 | 10/23/2013 20:40 | 0.0762 |
| 11/4/2013 1:30  | 0.155742656 | 10/23/2013 20:50 | 0.0762 |
| 11/4/2013 1:45  | 0.152910972 | 10/23/2013 21:00 | 0.0762 |
| 11/4/2013 2:00  | 0.152910972 | 10/23/2013 21:10 | 0.0762 |
| 11/4/2013 2:15  | 0.150079287 | 10/23/2013 21:20 | 0.0762 |
| 11/4/2013 2:30  | 0.144415918 | 10/23/2013 21:30 | 0.0762 |
| 11/4/2013 2:45  | 0.144415918 | 10/23/2013 21:40 | 0.0762 |
| 11/4/2013 3:00  | 0.144415918 | 10/23/2013 21:50 | 0.0762 |
| 11/4/2013 3:15  | 0.144415918 | 10/23/2013 22:00 | 0.0762 |
| 11/4/2013 3:30  | 0.141584233 | 10/23/2013 22:10 | 0.0762 |
| 11/4/2013 3:45  | 0.141584233 | 10/23/2013 22:20 | 0.0762 |
| 11/4/2013 4:00  | 0.141584233 | 10/23/2013 22:30 | 0.0762 |
| 11/4/2013 4:15  | 0.138752548 | 10/23/2013 22:40 | 0.0762 |
| 11/4/2013 4:30  | 0.138752548 | 10/23/2013 22:50 | 0.0762 |
| 11/4/2013 4:45  | 0.138752548 | 10/23/2013 23:00 | 0.0762 |
| 11/4/2013 5:00  | 0.133089179 | 10/23/2013 23:10 | 0.0762 |
| 11/4/2013 5:15  | 0.138752548 | 10/23/2013 23:20 | 0.0762 |
| 11/4/2013 5:30  | 0.138752548 | 10/23/2013 23:30 | 0.0762 |
| 11/4/2013 5:45  | 0.138752548 | 10/23/2013 23:40 | 0.0762 |
| 11/4/2013 6:00  | 0.141584233 | 10/23/2013 23:50 | 0.0762 |
| 11/4/2013 6:15  | 0.141584233 | 10/24/2013 0:00  | 0.0762 |

|                 |             |                 |   |
|-----------------|-------------|-----------------|---|
| 11/4/2013 6:30  | 0.141584233 | 10/24/2013 0:10 | 0 |
| 11/4/2013 6:45  | 0.138752548 | 10/24/2013 0:30 | 0 |
| 11/4/2013 7:00  | 0.141584233 | 10/24/2013 0:40 | 0 |
| 11/4/2013 7:15  | 0.144415918 | 10/24/2013 0:50 | 0 |
| 11/4/2013 7:30  | 0.144415918 | 10/24/2013 1:00 | 0 |
| 11/4/2013 7:45  | 0.152910972 | 10/24/2013 1:10 | 0 |
| 11/4/2013 8:00  | 0.155742656 | 10/24/2013 1:20 | 0 |
| 11/4/2013 8:15  | 0.16423771  | 10/24/2013 1:30 | 0 |
| 11/4/2013 8:30  | 0.178396134 | 10/24/2013 1:40 | 0 |
| 11/4/2013 8:45  | 0.181227818 | 10/24/2013 1:50 | 0 |
| 11/4/2013 9:00  | 0.189722872 | 10/24/2013 2:00 | 0 |
| 11/4/2013 9:15  | 0.195386242 | 10/24/2013 2:20 | 0 |
| 11/4/2013 9:30  | 0.201049611 | 10/24/2013 2:30 | 0 |
| 11/4/2013 9:45  | 0.209544665 | 10/24/2013 2:40 | 0 |
| 11/4/2013 10:00 | 0.215208034 | 10/24/2013 2:50 | 0 |
| 11/4/2013 10:15 | 0.215208034 | 10/24/2013 3:00 | 0 |
| 11/4/2013 10:30 | 0.215208034 | 10/24/2013 3:10 | 0 |
| 11/4/2013 10:45 | 0.209544665 | 10/24/2013 3:20 | 0 |
| 11/4/2013 11:00 | 0.209544665 | 10/24/2013 3:30 | 0 |
| 11/4/2013 11:15 | 0.209544665 | 10/24/2013 3:40 | 0 |
| 11/4/2013 11:30 | 0.203881296 | 10/24/2013 3:50 | 0 |
| 11/4/2013 11:45 | 0.201049611 | 10/24/2013 4:00 | 0 |
| 11/4/2013 12:00 | 0.195386242 | 10/24/2013 4:10 | 0 |
| 11/4/2013 12:15 | 0.189722872 | 10/24/2013 4:20 | 0 |
| 11/4/2013 12:30 | 0.186891188 | 10/24/2013 4:30 | 0 |
| 11/4/2013 12:45 | 0.186891188 | 10/24/2013 4:40 | 0 |
| 11/4/2013 13:00 | 0.186891188 | 10/24/2013 4:50 | 0 |
| 11/4/2013 13:15 | 0.186891188 | 10/24/2013 5:00 | 0 |
| 11/4/2013 13:30 | 0.186891188 | 10/24/2013 5:10 | 0 |
| 11/4/2013 13:45 | 0.186891188 | 10/24/2013 5:20 | 0 |
| 11/4/2013 14:00 | 0.186891188 | 10/24/2013 5:30 | 0 |
| 11/4/2013 14:15 | 0.178396134 | 10/24/2013 5:40 | 0 |
| 11/4/2013 14:30 | 0.178396134 | 10/24/2013 5:50 | 0 |
| 11/4/2013 14:45 | 0.172732764 | 10/24/2013 6:00 | 0 |
| 11/4/2013 15:00 | 0.172732764 | 10/24/2013 6:10 | 0 |
| 11/4/2013 15:15 | 0.172732764 | 10/24/2013 6:20 | 0 |
| 11/4/2013 15:30 | 0.16990108  | 10/24/2013 6:30 | 0 |
| 11/4/2013 15:45 | 0.16990108  | 10/24/2013 6:40 | 0 |
| 11/4/2013 16:00 | 0.16990108  | 10/24/2013 6:50 | 0 |
| 11/4/2013 16:15 | 0.16990108  | 10/24/2013 7:00 | 0 |
| 11/4/2013 16:30 | 0.16423771  | 10/24/2013 7:10 | 0 |
| 11/4/2013 16:45 | 0.16990108  | 10/24/2013 7:20 | 0 |
| 11/4/2013 17:00 | 0.16990108  | 10/24/2013 7:30 | 0 |
| 11/4/2013 17:15 | 0.16990108  | 10/24/2013 7:40 | 0 |
| 11/4/2013 17:30 | 0.16990108  | 10/24/2013 7:50 | 0 |
| 11/4/2013 17:45 | 0.172732764 | 10/24/2013 8:00 | 0 |
| 11/4/2013 18:00 | 0.16990108  | 10/24/2013 8:10 | 0 |

|                 |             |                  |   |
|-----------------|-------------|------------------|---|
| 11/4/2013 18:15 | 0.16990108  | 10/24/2013 8:20  | 0 |
| 11/4/2013 18:30 | 0.16990108  | 10/24/2013 8:30  | 0 |
| 11/4/2013 18:45 | 0.172732764 | 10/24/2013 8:40  | 0 |
| 11/4/2013 19:00 | 0.172732764 | 10/24/2013 8:50  | 0 |
| 11/4/2013 19:15 | 0.178396134 | 10/24/2013 9:00  | 0 |
| 11/4/2013 19:30 | 0.178396134 | 10/24/2013 9:10  | 0 |
| 11/4/2013 19:45 | 0.178396134 | 10/24/2013 9:20  | 0 |
| 11/4/2013 20:00 | 0.178396134 | 10/24/2013 9:30  | 0 |
| 11/4/2013 20:15 | 0.181227818 | 10/24/2013 9:40  | 0 |
| 11/4/2013 20:30 | 0.181227818 | 10/24/2013 9:50  | 0 |
| 11/4/2013 20:45 | 0.181227818 | 10/24/2013 10:00 | 0 |
| 11/4/2013 21:00 | 0.181227818 | 10/24/2013 10:10 | 0 |
| 11/4/2013 21:15 | 0.186891188 | 10/24/2013 10:20 | 0 |
| 11/4/2013 21:30 | 0.186891188 | 10/24/2013 10:30 | 0 |
| 11/4/2013 21:45 | 0.186891188 | 10/24/2013 10:40 | 0 |
| 11/4/2013 22:00 | 0.186891188 | 10/24/2013 10:50 | 0 |
| 11/4/2013 22:15 | 0.186891188 | 10/24/2013 11:00 | 0 |
| 11/4/2013 22:30 | 0.186891188 | 10/24/2013 11:10 | 0 |
| 11/4/2013 22:45 | 0.186891188 | 10/24/2013 11:20 | 0 |
| 11/4/2013 23:00 | 0.181227818 | 10/24/2013 11:30 | 0 |
| 11/4/2013 23:15 | 0.181227818 | 10/24/2013 11:40 | 0 |
| 11/4/2013 23:30 | 0.181227818 | 10/24/2013 11:50 | 0 |
| 11/4/2013 23:45 | 0.178396134 | 10/24/2013 12:00 | 0 |
| 11/5/2013 0:00  | 0.178396134 | 10/24/2013 12:10 | 0 |
| 11/5/2013 0:15  | 0.172732764 | 10/24/2013 12:20 | 0 |
| 11/5/2013 0:30  | 0.172732764 | 10/24/2013 12:30 | 0 |
| 11/5/2013 0:45  | 0.16990108  | 10/24/2013 12:40 | 0 |
| 11/5/2013 1:00  | 0.16423771  | 10/24/2013 12:50 | 0 |
| 11/5/2013 1:15  | 0.16423771  | 10/24/2013 13:00 | 0 |
| 11/5/2013 1:30  | 0.161406026 | 10/24/2013 13:10 | 0 |
| 11/5/2013 1:45  | 0.155742656 | 10/24/2013 13:20 | 0 |
| 11/5/2013 2:00  | 0.155742656 | 10/24/2013 13:30 | 0 |
| 11/5/2013 2:15  | 0.152910972 | 10/24/2013 13:40 | 0 |
| 11/5/2013 2:30  | 0.150079287 | 10/24/2013 13:50 | 0 |
| 11/5/2013 2:45  | 0.144415918 | 10/24/2013 14:00 | 0 |
| 11/5/2013 3:00  | 0.144415918 | 10/24/2013 14:10 | 0 |
| 11/5/2013 3:15  | 0.144415918 | 10/24/2013 14:20 | 0 |
| 11/5/2013 3:30  | 0.144415918 | 10/24/2013 14:30 | 0 |
| 11/5/2013 3:45  | 0.141584233 | 10/24/2013 14:40 | 0 |
| 11/5/2013 4:00  | 0.141584233 | 10/24/2013 14:50 | 0 |
| 11/5/2013 4:15  | 0.133089179 | 10/24/2013 15:00 | 0 |
| 11/5/2013 4:30  | 0.138752548 | 10/24/2013 15:10 | 0 |
| 11/5/2013 4:45  | 0.133089179 | 10/24/2013 15:20 | 0 |
| 11/5/2013 5:00  | 0.133089179 | 10/24/2013 15:30 | 0 |
| 11/5/2013 5:15  | 0.133089179 | 10/24/2013 15:40 | 0 |
| 11/5/2013 5:30  | 0.133089179 | 10/24/2013 15:50 | 0 |
| 11/5/2013 5:45  | 0.133089179 | 10/24/2013 16:00 | 0 |



|                 |             |                  |   |
|-----------------|-------------|------------------|---|
| 11/5/2013 6:00  | 0.133089179 | 10/24/2013 16:10 | 0 |
| 11/5/2013 6:15  | 0.130257494 | 10/24/2013 16:20 | 0 |
| 11/5/2013 6:30  | 0.133089179 | 10/24/2013 16:30 | 0 |
| 11/5/2013 6:45  | 0.133089179 | 10/24/2013 16:40 | 0 |
| 11/5/2013 7:00  | 0.133089179 | 10/24/2013 16:50 | 0 |
| 11/5/2013 7:15  | 0.138752548 | 10/24/2013 17:00 | 0 |
| 11/5/2013 7:30  | 0.155742656 | 10/24/2013 17:10 | 0 |
| 11/5/2013 7:45  | 0.144415918 | 10/24/2013 17:20 | 0 |
| 11/5/2013 8:00  | 0.150079287 | 10/24/2013 17:30 | 0 |
| 11/5/2013 8:15  | 0.155742656 | 10/24/2013 17:40 | 0 |
| 11/5/2013 8:30  | 0.161406026 | 10/24/2013 17:50 | 0 |
| 11/5/2013 8:45  | 0.16990108  | 10/24/2013 18:00 | 0 |
| 11/5/2013 9:00  | 0.178396134 | 10/24/2013 18:10 | 0 |
| 11/5/2013 9:15  | 0.181227818 | 10/24/2013 18:20 | 0 |
| 11/5/2013 9:30  | 0.186891188 | 10/24/2013 18:30 | 0 |
| 11/5/2013 9:45  | 0.189722872 | 10/24/2013 18:40 | 0 |
| 11/5/2013 10:00 | 0.186891188 | 10/24/2013 18:50 | 0 |
| 11/5/2013 10:15 | 0.186891188 | 10/24/2013 19:00 | 0 |
| 11/5/2013 10:30 | 0.186891188 | 10/24/2013 19:10 | 0 |
| 11/5/2013 10:45 | 0.181227818 | 10/24/2013 19:20 | 0 |
| 11/5/2013 11:00 | 0.181227818 | 10/24/2013 19:30 | 0 |
| 11/5/2013 11:15 | 0.181227818 | 10/24/2013 19:40 | 0 |
| 11/5/2013 11:30 | 0.181227818 | 10/24/2013 19:50 | 0 |
| 11/5/2013 11:45 | 0.178396134 | 10/24/2013 20:00 | 0 |
| 11/5/2013 12:00 | 0.172732764 | 10/24/2013 20:10 | 0 |
| 11/5/2013 12:15 | 0.16990108  | 10/24/2013 20:20 | 0 |
| 11/5/2013 12:30 | 0.16990108  | 10/24/2013 20:30 | 0 |
| 11/5/2013 12:45 | 0.16423771  | 10/24/2013 20:40 | 0 |
| 11/5/2013 13:00 | 0.161406026 | 10/24/2013 20:50 | 0 |
| 11/5/2013 13:15 | 0.161406026 | 10/24/2013 21:00 | 0 |
| 11/5/2013 13:30 | 0.16423771  | 10/24/2013 21:10 | 0 |
| 11/5/2013 13:45 | 0.16423771  | 10/24/2013 21:20 | 0 |
| 11/5/2013 14:00 | 0.16423771  | 10/24/2013 21:30 | 0 |
| 11/5/2013 14:15 | 0.16423771  | 10/24/2013 21:40 | 0 |
| 11/5/2013 14:30 | 0.16990108  | 10/24/2013 21:50 | 0 |
| 11/5/2013 14:45 | 0.16423771  | 10/24/2013 22:00 | 0 |
| 11/5/2013 15:00 | 0.16423771  | 10/24/2013 22:10 | 0 |
| 11/5/2013 15:15 | 0.16423771  | 10/24/2013 22:20 | 0 |
| 11/5/2013 15:30 | 0.16990108  | 10/24/2013 22:30 | 0 |
| 11/5/2013 15:45 | 0.16990108  | 10/24/2013 22:40 | 0 |
| 11/5/2013 16:00 | 0.16990108  | 10/24/2013 22:50 | 0 |
| 11/5/2013 16:15 | 0.178396134 | 10/24/2013 23:00 | 0 |
| 11/5/2013 16:30 | 0.186891188 | 10/24/2013 23:10 | 0 |
| 11/5/2013 16:45 | 0.203881296 | 10/24/2013 23:20 | 0 |
| 11/5/2013 17:00 | 0.229366457 | 10/24/2013 23:30 | 0 |
| 11/5/2013 17:15 | 0.24918825  | 10/24/2013 23:40 | 0 |
| 11/5/2013 17:30 | 0.277505097 | 10/24/2013 23:50 | 0 |

|                 |             |                 |   |
|-----------------|-------------|-----------------|---|
| 11/5/2013 17:45 | 0.283168466 | 10/25/2013 0:00 | 0 |
| 11/5/2013 18:00 | 0.311485313 | 10/25/2013 0:10 | 0 |
| 11/5/2013 18:15 | 0.311485313 | 10/25/2013 0:20 | 0 |
| 11/5/2013 18:30 | 0.311485313 | 10/25/2013 0:30 | 0 |
| 11/5/2013 18:45 | 0.311485313 | 10/25/2013 0:40 | 0 |
| 11/5/2013 19:00 | 0.283168466 | 10/25/2013 0:50 | 0 |
| 11/5/2013 19:15 | 0.311485313 | 10/25/2013 1:00 | 0 |
| 11/5/2013 19:30 | 0.339802159 | 10/25/2013 1:10 | 0 |
| 11/5/2013 19:45 | 0.368119006 | 10/25/2013 1:20 | 0 |
| 11/5/2013 20:00 | 0.424752699 | 10/25/2013 1:30 | 0 |
| 11/5/2013 20:15 | 0.453069546 | 10/25/2013 1:40 | 0 |
| 11/5/2013 20:30 | 0.453069546 | 10/25/2013 1:50 | 0 |
| 11/5/2013 20:45 | 0.453069546 | 10/25/2013 2:00 | 0 |
| 11/5/2013 21:00 | 0.453069546 | 10/25/2013 2:10 | 0 |
| 11/5/2013 21:15 | 0.453069546 | 10/25/2013 2:20 | 0 |
| 11/5/2013 21:30 | 0.453069546 | 10/25/2013 2:30 | 0 |
| 11/5/2013 21:45 | 0.453069546 | 10/25/2013 2:40 | 0 |
| 11/5/2013 22:00 | 0.481386392 | 10/25/2013 2:50 | 0 |
| 11/5/2013 22:15 | 0.453069546 | 10/25/2013 3:00 | 0 |
| 11/5/2013 22:30 | 0.453069546 | 10/25/2013 3:10 | 0 |
| 11/5/2013 22:45 | 0.453069546 | 10/25/2013 3:20 | 0 |
| 11/5/2013 23:00 | 0.453069546 | 10/25/2013 3:30 | 0 |
| 11/5/2013 23:15 | 0.424752699 | 10/25/2013 3:40 | 0 |
| 11/5/2013 23:30 | 0.424752699 | 10/25/2013 3:50 | 0 |
| 11/5/2013 23:45 | 0.453069546 | 10/25/2013 4:00 | 0 |
| 11/6/2013 0:00  | 0.481386392 | 10/25/2013 4:10 | 0 |
| 11/6/2013 0:15  | 0.538020085 | 10/25/2013 4:20 | 0 |
| 11/6/2013 0:30  | 0.594653779 | 10/25/2013 4:30 | 0 |
| 11/6/2013 0:45  | 0.594653779 | 10/25/2013 4:40 | 0 |
| 11/6/2013 1:00  | 0.594653779 | 10/25/2013 4:50 | 0 |
| 11/6/2013 1:15  | 0.566336932 | 10/25/2013 5:00 | 0 |
| 11/6/2013 1:30  | 0.566336932 | 10/25/2013 5:10 | 0 |
| 11/6/2013 1:45  | 0.566336932 | 10/25/2013 5:20 | 0 |
| 11/6/2013 2:00  | 0.566336932 | 10/25/2013 5:30 | 0 |
| 11/6/2013 2:15  | 0.566336932 | 10/25/2013 5:40 | 0 |
| 11/6/2013 2:30  | 0.566336932 | 10/25/2013 5:50 | 0 |
| 11/6/2013 2:45  | 0.594653779 | 10/25/2013 6:00 | 0 |
| 11/6/2013 3:00  | 0.594653779 | 10/25/2013 6:10 | 0 |
| 11/6/2013 3:15  | 0.566336932 | 10/25/2013 6:20 | 0 |
| 11/6/2013 3:30  | 0.566336932 | 10/25/2013 6:30 | 0 |
| 11/6/2013 3:45  | 0.538020085 | 10/25/2013 6:40 | 0 |
| 11/6/2013 4:00  | 0.538020085 | 10/25/2013 6:50 | 0 |
| 11/6/2013 4:15  | 0.538020085 | 10/25/2013 7:00 | 0 |
| 11/6/2013 4:30  | 0.509703239 | 10/25/2013 7:10 | 0 |
| 11/6/2013 4:45  | 0.481386392 | 10/25/2013 7:20 | 0 |
| 11/6/2013 5:00  | 0.481386392 | 10/25/2013 7:30 | 0 |
| 11/6/2013 5:15  | 0.481386392 | 10/25/2013 7:40 | 0 |

|                 |             |                  |   |
|-----------------|-------------|------------------|---|
| 11/6/2013 5:30  | 0.453069546 | 10/25/2013 7:50  | 0 |
| 11/6/2013 5:45  | 0.453069546 | 10/25/2013 8:00  | 0 |
| 11/6/2013 6:00  | 0.453069546 | 10/25/2013 8:10  | 0 |
| 11/6/2013 6:15  | 0.424752699 | 10/25/2013 8:20  | 0 |
| 11/6/2013 6:30  | 0.424752699 | 10/25/2013 8:30  | 0 |
| 11/6/2013 6:45  | 0.424752699 | 10/25/2013 8:40  | 0 |
| 11/6/2013 7:00  | 0.424752699 | 10/25/2013 8:50  | 0 |
| 11/6/2013 7:15  | 0.396435852 | 10/25/2013 9:00  | 0 |
| 11/6/2013 7:30  | 0.396435852 | 10/25/2013 9:10  | 0 |
| 11/6/2013 7:45  | 0.396435852 | 10/25/2013 9:20  | 0 |
| 11/6/2013 8:00  | 0.396435852 | 10/25/2013 9:30  | 0 |
| 11/6/2013 8:15  | 0.396435852 | 10/25/2013 9:40  | 0 |
| 11/6/2013 8:30  | 0.396435852 | 10/25/2013 9:50  | 0 |
| 11/6/2013 8:45  | 0.396435852 | 10/25/2013 10:00 | 0 |
| 11/6/2013 9:00  | 0.396435852 | 10/25/2013 10:10 | 0 |
| 11/6/2013 9:15  | 0.368119006 | 10/25/2013 10:20 | 0 |
| 11/6/2013 9:30  | 0.368119006 | 10/25/2013 10:30 | 0 |
| 11/6/2013 9:45  | 0.368119006 | 10/25/2013 10:40 | 0 |
| 11/6/2013 10:00 | 0.368119006 | 10/25/2013 10:50 | 0 |
| 11/6/2013 10:15 | 0.368119006 | 10/25/2013 11:00 | 0 |
| 11/6/2013 10:30 | 0.368119006 | 10/25/2013 11:10 | 0 |
| 11/6/2013 10:45 | 0.339802159 | 10/25/2013 11:20 | 0 |
| 11/6/2013 11:00 | 0.339802159 | 10/25/2013 11:30 | 0 |
| 11/6/2013 11:15 | 0.339802159 | 10/25/2013 11:40 | 0 |
| 11/6/2013 11:30 | 0.311485313 | 10/25/2013 11:50 | 0 |
| 11/6/2013 11:45 | 0.311485313 | 10/25/2013 12:00 | 0 |
| 11/6/2013 12:00 | 0.311485313 | 10/25/2013 12:10 | 0 |
| 11/6/2013 12:15 | 0.311485313 | 10/25/2013 12:20 | 0 |
| 11/6/2013 12:30 | 0.283168466 | 10/25/2013 12:30 | 0 |
| 11/6/2013 12:45 | 0.311485313 | 10/25/2013 12:40 | 0 |
| 11/6/2013 13:00 | 0.283168466 | 10/25/2013 12:50 | 0 |
| 11/6/2013 13:15 | 0.283168466 | 10/25/2013 13:00 | 0 |
| 11/6/2013 13:30 | 0.283168466 | 10/25/2013 13:10 | 0 |
| 11/6/2013 13:45 | 0.283168466 | 10/25/2013 13:20 | 0 |
| 11/6/2013 14:00 | 0.283168466 | 10/25/2013 13:30 | 0 |
| 11/6/2013 14:15 | 0.277505097 | 10/25/2013 13:40 | 0 |
| 11/6/2013 14:30 | 0.271841727 | 10/25/2013 13:50 | 0 |
| 11/6/2013 14:45 | 0.271841727 | 10/25/2013 14:00 | 0 |
| 11/6/2013 15:00 | 0.271841727 | 10/25/2013 14:10 | 0 |
| 11/6/2013 15:15 | 0.266178358 | 10/25/2013 14:20 | 0 |
| 11/6/2013 15:30 | 0.260514989 | 10/25/2013 14:30 | 0 |
| 11/6/2013 15:45 | 0.260514989 | 10/25/2013 14:40 | 0 |
| 11/6/2013 16:00 | 0.260514989 | 10/25/2013 14:50 | 0 |
| 11/6/2013 16:15 | 0.260514989 | 10/25/2013 15:00 | 0 |
| 11/6/2013 16:30 | 0.254851619 | 10/25/2013 15:10 | 0 |
| 11/6/2013 16:45 | 0.254851619 | 10/25/2013 15:20 | 0 |
| 11/6/2013 17:00 | 0.254851619 | 10/25/2013 15:30 | 0 |

|                 |             |                  |   |
|-----------------|-------------|------------------|---|
| 11/6/2013 17:15 | 0.24918825  | 10/25/2013 15:40 | 0 |
| 11/6/2013 17:30 | 0.254851619 | 10/25/2013 15:50 | 0 |
| 11/6/2013 17:45 | 0.24918825  | 10/25/2013 16:00 | 0 |
| 11/6/2013 18:00 | 0.24918825  | 10/25/2013 16:10 | 0 |
| 11/6/2013 18:15 | 0.24918825  | 10/25/2013 16:20 | 0 |
| 11/6/2013 18:30 | 0.24918825  | 10/25/2013 16:30 | 0 |
| 11/6/2013 18:45 | 0.24918825  | 10/25/2013 16:40 | 0 |
| 11/6/2013 19:00 | 0.254851619 | 10/25/2013 16:50 | 0 |
| 11/6/2013 19:15 | 0.24918825  | 10/25/2013 17:00 | 0 |
| 11/6/2013 19:30 | 0.24918825  | 10/25/2013 17:10 | 0 |
| 11/6/2013 19:45 | 0.24918825  | 10/25/2013 17:20 | 0 |
| 11/6/2013 20:00 | 0.24918825  | 10/25/2013 17:30 | 0 |
| 11/6/2013 20:15 | 0.24918825  | 10/25/2013 17:40 | 0 |
| 11/6/2013 20:30 | 0.24918825  | 10/25/2013 17:50 | 0 |
| 11/6/2013 20:45 | 0.254851619 | 10/25/2013 18:00 | 0 |
| 11/6/2013 21:00 | 0.254851619 | 10/25/2013 18:10 | 0 |
| 11/6/2013 21:15 | 0.260514989 | 10/25/2013 18:20 | 0 |
| 11/6/2013 21:30 | 0.254851619 | 10/25/2013 18:30 | 0 |
| 11/6/2013 21:45 | 0.254851619 | 10/25/2013 18:40 | 0 |
| 11/6/2013 22:00 | 0.254851619 | 10/25/2013 18:50 | 0 |
| 11/6/2013 22:15 | 0.260514989 | 10/26/2013 19:00 | 0 |
| 11/6/2013 22:30 | 0.254851619 | 10/26/2013 19:10 | 0 |
| 11/6/2013 22:45 | 0.24918825  | 10/26/2013 19:20 | 0 |
| 11/6/2013 23:00 | 0.254851619 | 10/26/2013 19:30 | 0 |
| 11/6/2013 23:15 | 0.254851619 | 10/26/2013 19:40 | 0 |
| 11/6/2013 23:30 | 0.24918825  | 10/26/2013 19:50 | 0 |
| 11/6/2013 23:45 | 0.24918825  | 10/26/2013 20:00 | 0 |
| 11/7/2013 0:00  | 0.243524881 | 10/26/2013 22:40 | 0 |
| 11/7/2013 0:15  | 0.243524881 | 10/26/2013 22:50 | 0 |
| 11/7/2013 0:30  | 0.243524881 | 10/26/2013 23:00 | 0 |
| 11/7/2013 0:45  | 0.240693196 | 10/26/2013 23:10 | 0 |
| 11/7/2013 1:00  | 0.235029827 | 10/26/2013 23:20 | 0 |
| 11/7/2013 1:15  | 0.229366457 | 10/26/2013 23:30 | 0 |
| 11/7/2013 1:30  | 0.229366457 | 10/26/2013 23:40 | 0 |
| 11/7/2013 1:45  | 0.218039719 | 10/26/2013 23:50 | 0 |
| 11/7/2013 2:00  | 0.218039719 | 10/27/2013 0:00  | 0 |
| 11/7/2013 2:15  | 0.215208034 | 10/27/2013 0:10  | 0 |
| 11/7/2013 2:30  | 0.215208034 | 10/27/2013 0:20  | 0 |
| 11/7/2013 2:45  | 0.215208034 | 10/27/2013 0:30  | 0 |
| 11/7/2013 3:00  | 0.209544665 | 10/27/2013 0:40  | 0 |
| 11/7/2013 3:15  | 0.203881296 | 10/27/2013 0:50  | 0 |
| 11/7/2013 3:30  | 0.203881296 | 10/27/2013 1:00  | 0 |
| 11/7/2013 3:45  | 0.203881296 | 10/27/2013 1:10  | 0 |
| 11/7/2013 4:00  | 0.201049611 | 10/27/2013 1:20  | 0 |
| 11/7/2013 4:15  | 0.195386242 | 10/27/2013 1:30  | 0 |
| 11/7/2013 4:30  | 0.195386242 | 10/27/2013 1:40  | 0 |
| 11/7/2013 4:45  | 0.195386242 | 10/27/2013 1:50  | 0 |

|                 |             |                  |   |
|-----------------|-------------|------------------|---|
| 11/7/2013 5:00  | 0.195386242 | 10/27/2013 2:00  | 0 |
| 11/7/2013 5:15  | 0.195386242 | 10/27/2013 2:10  | 0 |
| 11/7/2013 5:30  | 0.189722872 | 10/27/2013 2:20  | 0 |
| 11/7/2013 5:45  | 0.189722872 | 10/27/2013 2:30  | 0 |
| 11/7/2013 6:00  | 0.189722872 | 10/27/2013 2:40  | 0 |
| 11/7/2013 6:15  | 0.189722872 | 10/27/2013 2:50  | 0 |
| 11/7/2013 6:30  | 0.189722872 | 10/27/2013 3:00  | 0 |
| 11/7/2013 6:45  | 0.189722872 | 10/27/2013 3:10  | 0 |
| 11/7/2013 7:00  | 0.195386242 | 10/27/2013 3:20  | 0 |
| 11/7/2013 7:15  | 0.189722872 | 10/27/2013 3:30  | 0 |
| 11/7/2013 7:30  | 0.195386242 | 10/27/2013 3:40  | 0 |
| 11/7/2013 7:45  | 0.195386242 | 10/27/2013 3:50  | 0 |
| 11/7/2013 8:00  | 0.203881296 | 10/27/2013 4:00  | 0 |
| 11/7/2013 8:15  | 0.209544665 | 10/27/2013 4:10  | 0 |
| 11/7/2013 8:30  | 0.209544665 | 10/27/2013 4:20  | 0 |
| 11/7/2013 8:45  | 0.215208034 | 10/27/2013 4:30  | 0 |
| 11/7/2013 9:00  | 0.223703088 | 10/27/2013 4:40  | 0 |
| 11/7/2013 9:15  | 0.223703088 | 10/27/2013 4:50  | 0 |
| 11/7/2013 9:30  | 0.229366457 | 10/27/2013 6:20  | 0 |
| 11/7/2013 9:45  | 0.229366457 | 10/27/2013 6:30  | 0 |
| 11/7/2013 10:00 | 0.229366457 | 10/27/2013 6:40  | 0 |
| 11/7/2013 10:15 | 0.229366457 | 10/27/2013 6:50  | 0 |
| 11/7/2013 10:30 | 0.223703088 | 10/27/2013 7:00  | 0 |
| 11/7/2013 10:45 | 0.223703088 | 10/27/2013 7:10  | 0 |
| 11/7/2013 11:00 | 0.218039719 | 10/27/2013 7:20  | 0 |
| 11/7/2013 11:15 | 0.218039719 | 10/27/2013 7:30  | 0 |
| 11/7/2013 11:30 | 0.215208034 | 10/27/2013 7:40  | 0 |
| 11/7/2013 11:45 | 0.215208034 | 10/27/2013 7:50  | 0 |
| 11/7/2013 12:00 | 0.215208034 | 10/27/2013 8:00  | 0 |
| 11/7/2013 12:15 | 0.209544665 | 10/27/2013 8:10  | 0 |
| 11/7/2013 12:30 | 0.203881296 | 10/27/2013 8:20  | 0 |
| 11/7/2013 12:45 | 0.201049611 | 10/27/2013 8:30  | 0 |
| 11/7/2013 13:00 | 0.201049611 | 10/27/2013 8:40  | 0 |
| 11/7/2013 13:15 | 0.201049611 | 10/27/2013 8:50  | 0 |
| 11/7/2013 13:30 | 0.201049611 | 10/27/2013 9:00  | 0 |
| 11/7/2013 13:45 | 0.201049611 | 10/27/2013 9:10  | 0 |
| 11/7/2013 14:00 | 0.201049611 | 10/27/2013 9:20  | 0 |
| 11/7/2013 14:15 | 0.201049611 | 10/27/2013 9:30  | 0 |
| 11/7/2013 14:30 | 0.195386242 | 10/27/2013 9:40  | 0 |
| 11/7/2013 14:45 | 0.195386242 | 10/27/2013 9:50  | 0 |
| 11/7/2013 15:00 | 0.195386242 | 10/27/2013 10:00 | 0 |
| 11/7/2013 15:15 | 0.195386242 | 10/27/2013 10:10 | 0 |
| 11/7/2013 15:30 | 0.189722872 | 10/27/2013 10:20 | 0 |
| 11/7/2013 15:45 | 0.186891188 | 10/27/2013 10:30 | 0 |
| 11/7/2013 16:00 | 0.186891188 | 10/27/2013 10:40 | 0 |
| 11/7/2013 16:15 | 0.186891188 | 10/27/2013 10:50 | 0 |
| 11/7/2013 16:30 | 0.186891188 | 10/27/2013 11:00 | 0 |

|                 |             |                  |   |
|-----------------|-------------|------------------|---|
| 11/7/2013 16:45 | 0.186891188 | 10/27/2013 11:10 | 0 |
| 11/7/2013 17:00 | 0.186891188 | 10/27/2013 11:20 | 0 |
| 11/7/2013 17:15 | 0.186891188 | 10/27/2013 11:30 | 0 |
| 11/7/2013 17:30 | 0.181227818 | 10/27/2013 11:40 | 0 |
| 11/7/2013 17:45 | 0.181227818 | 10/27/2013 11:50 | 0 |
| 11/7/2013 18:00 | 0.181227818 | 10/27/2013 12:00 | 0 |
| 11/7/2013 18:15 | 0.181227818 | 10/27/2013 12:10 | 0 |
| 11/7/2013 18:30 | 0.181227818 | 10/27/2013 12:20 | 0 |
| 11/7/2013 18:45 | 0.181227818 | 10/27/2013 12:30 | 0 |
| 11/7/2013 19:00 | 0.181227818 | 10/27/2013 12:40 | 0 |
| 11/7/2013 19:15 | 0.186891188 | 10/27/2013 12:50 | 0 |
| 11/7/2013 19:30 | 0.186891188 | 10/27/2013 13:00 | 0 |
| 11/7/2013 19:45 | 0.186891188 | 10/27/2013 13:10 | 0 |
| 11/7/2013 20:00 | 0.186891188 | 10/27/2013 13:20 | 0 |
| 11/7/2013 20:15 | 0.186891188 | 10/27/2013 13:30 | 0 |
| 11/7/2013 20:30 | 0.186891188 | 10/27/2013 13:40 | 0 |
| 11/7/2013 20:45 | 0.186891188 | 10/27/2013 13:50 | 0 |
| 11/7/2013 21:00 | 0.189722872 | 10/27/2013 14:00 | 0 |
| 11/7/2013 21:15 | 0.189722872 | 10/27/2013 14:10 | 0 |
| 11/7/2013 21:30 | 0.195386242 | 10/27/2013 14:20 | 0 |
| 11/7/2013 21:45 | 0.195386242 | 10/27/2013 14:30 | 0 |
| 11/7/2013 22:00 | 0.189722872 | 10/27/2013 14:40 | 0 |
| 11/7/2013 22:15 | 0.195386242 | 10/27/2013 14:50 | 0 |
| 11/7/2013 22:30 | 0.189722872 | 10/27/2013 15:00 | 0 |
| 11/7/2013 22:45 | 0.189722872 | 10/27/2013 15:10 | 0 |
| 11/7/2013 23:00 | 0.189722872 | 10/27/2013 15:20 | 0 |
| 11/7/2013 23:15 | 0.195386242 | 10/27/2013 15:30 | 0 |
| 11/7/2013 23:30 | 0.189722872 | 10/27/2013 15:40 | 0 |
| 11/7/2013 23:45 | 0.186891188 | 10/27/2013 15:50 | 0 |
| 11/8/2013 0:00  | 0.186891188 | 10/27/2013 16:00 | 0 |
| 11/8/2013 0:15  | 0.181227818 | 10/27/2013 16:10 | 0 |
| 11/8/2013 0:30  | 0.181227818 | 10/27/2013 16:20 | 0 |
| 11/8/2013 0:45  | 0.181227818 | 10/27/2013 16:30 | 0 |
| 11/8/2013 1:00  | 0.178396134 | 10/27/2013 16:40 | 0 |
| 11/8/2013 1:15  | 0.172732764 | 10/27/2013 16:50 | 0 |
| 11/8/2013 1:30  | 0.16990108  | 10/27/2013 17:00 | 0 |
| 11/8/2013 1:45  | 0.16990108  | 10/27/2013 17:10 | 0 |
| 11/8/2013 2:00  | 0.16423771  | 10/27/2013 17:20 | 0 |
| 11/8/2013 2:15  | 0.161406026 | 10/27/2013 17:30 | 0 |
| 11/8/2013 2:30  | 0.161406026 | 10/27/2013 17:40 | 0 |
| 11/8/2013 2:45  | 0.155742656 | 10/27/2013 17:50 | 0 |
| 11/8/2013 3:00  | 0.152910972 | 10/27/2013 18:00 | 0 |
| 11/8/2013 3:15  | 0.152910972 | 10/27/2013 18:10 | 0 |
| 11/8/2013 3:30  | 0.150079287 | 10/27/2013 18:20 | 0 |
| 11/8/2013 3:45  | 0.150079287 | 10/27/2013 18:30 | 0 |
| 11/8/2013 4:00  | 0.144415918 | 10/27/2013 18:40 | 0 |
| 11/8/2013 4:15  | 0.141584233 | 10/27/2013 18:50 | 0 |

|                 |             |                  |   |
|-----------------|-------------|------------------|---|
| 11/8/2013 4:30  | 0.141584233 | 10/27/2013 19:00 | 0 |
| 11/8/2013 4:45  | 0.141584233 | 10/27/2013 19:10 | 0 |
| 11/8/2013 5:00  | 0.141584233 | 10/27/2013 19:20 | 0 |
| 11/8/2013 5:15  | 0.141584233 | 10/27/2013 19:30 | 0 |
| 11/8/2013 5:30  | 0.141584233 | 10/27/2013 19:40 | 0 |
| 11/8/2013 5:45  | 0.141584233 | 10/27/2013 19:50 | 0 |
| 11/8/2013 6:00  | 0.141584233 | 10/27/2013 20:00 | 0 |
| 11/8/2013 6:15  | 0.141584233 | 10/27/2013 20:10 | 0 |
| 11/8/2013 6:30  | 0.144415918 | 10/27/2013 20:20 | 0 |
| 11/8/2013 6:45  | 0.144415918 | 10/27/2013 20:30 | 0 |
| 11/8/2013 7:00  | 0.144415918 | 10/27/2013 20:40 | 0 |
| 11/8/2013 7:15  | 0.150079287 | 10/27/2013 20:50 | 0 |
| 11/8/2013 7:30  | 0.150079287 | 10/27/2013 21:00 | 0 |
| 11/8/2013 7:45  | 0.150079287 | 10/27/2013 21:10 | 0 |
| 11/8/2013 8:00  | 0.152910972 | 10/27/2013 21:20 | 0 |
| 11/8/2013 8:15  | 0.155742656 | 10/27/2013 21:30 | 0 |
| 11/8/2013 8:30  | 0.155742656 | 10/27/2013 21:40 | 0 |
| 11/8/2013 8:45  | 0.152910972 | 10/27/2013 21:50 | 0 |
| 11/8/2013 9:00  | 0.150079287 | 10/27/2013 22:00 | 0 |
| 11/8/2013 9:15  | 0.152910972 | 10/27/2013 22:10 | 0 |
| 11/8/2013 9:30  | 0.152910972 | 10/27/2013 22:20 | 0 |
| 11/8/2013 9:45  | 0.155742656 | 10/27/2013 22:30 | 0 |
| 11/8/2013 10:00 | 0.155742656 | 10/27/2013 22:40 | 0 |
| 11/8/2013 10:15 | 0.155742656 | 10/27/2013 22:50 | 0 |
| 11/8/2013 10:30 | 0.155742656 | 10/27/2013 23:00 | 0 |
| 11/8/2013 10:45 | 0.152910972 | 10/27/2013 23:10 | 0 |
| 11/8/2013 11:00 | 0.152910972 | 10/27/2013 23:20 | 0 |
| 11/8/2013 11:15 | 0.150079287 | 10/27/2013 23:30 | 0 |
| 11/8/2013 11:30 | 0.150079287 | 10/27/2013 23:40 | 0 |
| 11/8/2013 11:45 | 0.144415918 | 10/27/2013 23:50 | 0 |
| 11/8/2013 12:00 | 0.144415918 | 10/28/2013 0:00  | 0 |
| 11/8/2013 12:15 | 0.150079287 | 10/28/2013 0:10  | 0 |
| 11/8/2013 12:30 | 0.144415918 | 10/28/2013 0:20  | 0 |
| 11/8/2013 12:45 | 0.144415918 | 10/28/2013 0:30  | 0 |
| 11/8/2013 13:00 | 0.141584233 | 10/28/2013 0:40  | 0 |
| 11/8/2013 13:15 | 0.141584233 | 10/28/2013 0:50  | 0 |
| 11/8/2013 13:30 | 0.144415918 | 10/28/2013 1:00  | 0 |
| 11/8/2013 13:45 | 0.144415918 | 10/28/2013 1:10  | 0 |
| 11/8/2013 14:00 | 0.141584233 | 10/28/2013 1:20  | 0 |
| 11/8/2013 14:15 | 0.141584233 | 10/28/2013 1:30  | 0 |
| 11/8/2013 14:30 | 0.141584233 | 10/28/2013 1:40  | 0 |
| 11/8/2013 14:45 | 0.141584233 | 10/28/2013 1:50  | 0 |
| 11/8/2013 15:00 | 0.141584233 | 10/28/2013 2:00  | 0 |
| 11/8/2013 15:15 | 0.138752548 | 10/28/2013 2:10  | 0 |
| 11/8/2013 15:30 | 0.138752548 | 10/28/2013 2:20  | 0 |
| 11/8/2013 15:45 | 0.138752548 | 10/28/2013 2:30  | 0 |
| 11/8/2013 16:00 | 0.138752548 | 10/28/2013 2:40  | 0 |

|                 |             |                  |   |
|-----------------|-------------|------------------|---|
| 11/8/2013 16:15 | 0.138752548 | 10/28/2013 2:50  | 0 |
| 11/8/2013 16:30 | 0.133089179 | 10/28/2013 3:00  | 0 |
| 11/8/2013 16:45 | 0.138752548 | 10/28/2013 3:10  | 0 |
| 11/8/2013 17:00 | 0.133089179 | 10/28/2013 3:20  | 0 |
| 11/8/2013 17:15 | 0.133089179 | 10/28/2013 3:30  | 0 |
| 11/8/2013 17:30 | 0.130257494 | 10/28/2013 3:40  | 0 |
| 11/8/2013 17:45 | 0.130257494 | 10/28/2013 3:50  | 0 |
| 11/8/2013 18:00 | 0.130257494 | 10/28/2013 4:00  | 0 |
| 11/8/2013 18:15 | 0.130257494 | 10/28/2013 4:10  | 0 |
| 11/8/2013 18:30 | 0.133089179 | 10/28/2013 4:20  | 0 |
| 11/8/2013 18:45 | 0.133089179 | 10/28/2013 4:30  | 0 |
| 11/8/2013 19:00 | 0.130257494 | 10/28/2013 4:40  | 0 |
| 11/8/2013 19:15 | 0.133089179 | 10/28/2013 4:50  | 0 |
| 11/8/2013 19:30 | 0.133089179 | 10/28/2013 5:00  | 0 |
| 11/8/2013 19:45 | 0.133089179 | 10/28/2013 5:10  | 0 |
| 11/8/2013 20:00 | 0.133089179 | 10/28/2013 5:20  | 0 |
| 11/8/2013 20:15 | 0.133089179 | 10/28/2013 5:30  | 0 |
| 11/8/2013 20:30 | 0.133089179 | 10/28/2013 5:40  | 0 |
| 11/8/2013 20:45 | 0.133089179 | 10/28/2013 5:50  | 0 |
| 11/8/2013 21:00 | 0.133089179 | 10/28/2013 6:00  | 0 |
| 11/8/2013 21:15 | 0.138752548 | 10/28/2013 6:10  | 0 |
| 11/8/2013 21:30 | 0.133089179 | 10/28/2013 6:20  | 0 |
| 11/8/2013 21:45 | 0.138752548 | 10/28/2013 6:30  | 0 |
| 11/8/2013 22:00 | 0.133089179 | 10/28/2013 6:40  | 0 |
| 11/8/2013 22:15 | 0.133089179 | 10/28/2013 6:50  | 0 |
| 11/8/2013 22:30 | 0.133089179 | 10/28/2013 7:00  | 0 |
| 11/8/2013 22:45 | 0.133089179 | 10/28/2013 7:10  | 0 |
| 11/8/2013 23:00 | 0.133089179 | 10/28/2013 7:20  | 0 |
| 11/8/2013 23:15 | 0.133089179 | 10/28/2013 7:30  | 0 |
| 11/8/2013 23:30 | 0.133089179 | 10/28/2013 7:40  | 0 |
| 11/8/2013 23:45 | 0.130257494 | 10/28/2013 7:50  | 0 |
| 11/9/2013 0:00  | 0.130257494 | 10/28/2013 8:00  | 0 |
| 11/9/2013 0:15  | 0.133089179 | 10/28/2013 8:10  | 0 |
| 11/9/2013 0:30  | 0.130257494 | 10/28/2013 8:20  | 0 |
| 11/9/2013 0:45  | 0.130257494 | 10/28/2013 8:30  | 0 |
| 11/9/2013 1:00  | 0.130257494 | 10/28/2013 8:40  | 0 |
| 11/9/2013 1:15  | 0.130257494 | 10/28/2013 8:50  | 0 |
| 11/9/2013 1:30  | 0.12742581  | 10/28/2013 9:00  | 0 |
| 11/9/2013 1:45  | 0.12742581  | 10/28/2013 9:10  | 0 |
| 11/9/2013 2:00  | 0.12742581  | 10/28/2013 9:20  | 0 |
| 11/9/2013 2:15  | 0.124594125 | 10/28/2013 9:30  | 0 |
| 11/9/2013 2:30  | 0.124594125 | 10/28/2013 9:40  | 0 |
| 11/9/2013 2:45  | 0.124594125 | 10/28/2013 9:50  | 0 |
| 11/9/2013 3:00  | 0.124594125 | 10/28/2013 10:00 | 0 |
| 11/9/2013 3:15  | 0.12176244  | 10/28/2013 10:10 | 0 |
| 11/9/2013 3:30  | 0.12176244  | 10/28/2013 10:20 | 0 |
| 11/9/2013 3:45  | 0.12176244  | 10/28/2013 10:30 | 0 |



|                 |             |                  |   |
|-----------------|-------------|------------------|---|
| 11/9/2013 4:00  | 0.116099071 | 10/28/2013 10:40 | 0 |
| 11/9/2013 4:15  | 0.116099071 | 10/28/2013 10:50 | 0 |
| 11/9/2013 4:30  | 0.116099071 | 10/28/2013 11:00 | 0 |
| 11/9/2013 4:45  | 0.116099071 | 10/28/2013 11:10 | 0 |
| 11/9/2013 5:00  | 0.116099071 | 10/28/2013 11:20 | 0 |
| 11/9/2013 5:15  | 0.113267386 | 10/28/2013 11:30 | 0 |
| 11/9/2013 5:30  | 0.113267386 | 10/28/2013 11:40 | 0 |
| 11/9/2013 5:45  | 0.113267386 | 10/28/2013 11:50 | 0 |
| 11/9/2013 6:00  | 0.113267386 | 10/28/2013 12:00 | 0 |
| 11/9/2013 6:15  | 0.113267386 | 10/28/2013 12:10 | 0 |
| 11/9/2013 6:30  | 0.113267386 | 10/28/2013 12:20 | 0 |
| 11/9/2013 6:45  | 0.113267386 | 10/28/2013 12:30 | 0 |
| 11/9/2013 7:00  | 0.113267386 | 10/28/2013 12:40 | 0 |
| 11/9/2013 7:15  | 0.110435702 | 10/28/2013 12:50 | 0 |
| 11/9/2013 7:30  | 0.110435702 | 10/28/2013 13:00 | 0 |
| 11/9/2013 7:45  | 0.110435702 | 10/28/2013 13:10 | 0 |
| 11/9/2013 8:00  | 0.110435702 | 10/28/2013 13:20 | 0 |
| 11/9/2013 8:15  | 0.110435702 | 10/28/2013 13:30 | 0 |
| 11/9/2013 8:30  | 0.110435702 | 10/28/2013 13:40 | 0 |
| 11/9/2013 8:45  | 0.113267386 | 10/28/2013 13:50 | 0 |
| 11/9/2013 9:00  | 0.116099071 | 10/28/2013 14:00 | 0 |
| 11/9/2013 9:15  | 0.116099071 | 10/28/2013 14:10 | 0 |
| 11/9/2013 9:30  | 0.12176244  | 10/28/2013 14:20 | 0 |
| 11/9/2013 9:45  | 0.124594125 | 10/28/2013 14:30 | 0 |
| 11/9/2013 10:00 | 0.12742581  | 10/28/2013 14:40 | 0 |
| 11/9/2013 10:15 | 0.12742581  | 10/28/2013 14:50 | 0 |
| 11/9/2013 10:30 | 0.12742581  | 10/28/2013 15:00 | 0 |
| 11/9/2013 10:45 | 0.130257494 | 10/28/2013 15:10 | 0 |
| 11/9/2013 11:00 | 0.133089179 | 10/28/2013 15:20 | 0 |
| 11/9/2013 11:15 | 0.138752548 | 10/28/2013 15:30 | 0 |
| 11/9/2013 11:30 | 0.138752548 | 10/28/2013 15:40 | 0 |
| 11/9/2013 11:45 | 0.138752548 | 10/28/2013 15:50 | 0 |
| 11/9/2013 12:00 | 0.141584233 | 10/28/2013 16:00 | 0 |
| 11/9/2013 12:15 | 0.138752548 | 10/28/2013 16:10 | 0 |
| 11/9/2013 12:30 | 0.141584233 | 10/28/2013 16:20 | 0 |
| 11/9/2013 12:45 | 0.141584233 | 10/28/2013 16:30 | 0 |
| 11/9/2013 13:00 | 0.138752548 | 10/28/2013 16:40 | 0 |
| 11/9/2013 13:15 | 0.141584233 | 10/28/2013 16:50 | 0 |
| 11/9/2013 13:30 | 0.141584233 | 10/28/2013 17:00 | 0 |
| 11/9/2013 13:45 | 0.141584233 | 10/28/2013 17:10 | 0 |
| 11/9/2013 14:00 | 0.138752548 | 10/28/2013 17:20 | 0 |
| 11/9/2013 14:15 | 0.138752548 | 10/28/2013 17:30 | 0 |
| 11/9/2013 14:30 | 0.133089179 | 10/28/2013 17:40 | 0 |
| 11/9/2013 14:45 | 0.133089179 | 10/28/2013 17:50 | 0 |
| 11/9/2013 15:00 | 0.133089179 | 10/28/2013 18:00 | 0 |
| 11/9/2013 15:15 | 0.130257494 | 10/28/2013 18:10 | 0 |
| 11/9/2013 15:30 | 0.130257494 | 10/28/2013 18:20 | 0 |

|                 |             |                  |   |
|-----------------|-------------|------------------|---|
| 11/9/2013 15:45 | 0.12742581  | 10/28/2013 18:30 | 0 |
| 11/9/2013 16:00 | 0.12742581  | 10/28/2013 18:40 | 0 |
| 11/9/2013 16:15 | 0.12742581  | 10/28/2013 18:50 | 0 |
| 11/9/2013 16:30 | 0.12742581  | 10/28/2013 19:00 | 0 |
| 11/9/2013 16:45 | 0.12742581  | 10/28/2013 19:10 | 0 |
| 11/9/2013 17:00 | 0.12742581  | 10/28/2013 19:20 | 0 |
| 11/9/2013 17:15 | 0.12742581  | 10/28/2013 19:40 | 0 |
| 11/9/2013 17:30 | 0.12742581  | 10/28/2013 19:50 | 0 |
| 11/9/2013 17:45 | 0.12742581  | 10/28/2013 20:00 | 0 |
| 11/9/2013 18:00 | 0.12742581  | 10/28/2013 20:10 | 0 |
| 11/9/2013 18:15 | 0.12742581  | 10/28/2013 20:20 | 0 |
| 11/9/2013 18:30 | 0.12742581  | 10/28/2013 20:30 | 0 |
| 11/9/2013 18:45 | 0.12742581  | 10/28/2013 20:40 | 0 |
| 11/9/2013 19:00 | 0.12742581  | 10/28/2013 20:50 | 0 |
| 11/9/2013 19:15 | 0.12742581  | 10/28/2013 21:00 | 0 |
| 11/9/2013 19:30 | 0.12742581  | 10/28/2013 21:10 | 0 |
| 11/9/2013 19:45 | 0.124594125 | 10/28/2013 21:20 | 0 |
| 11/9/2013 20:00 | 0.12742581  | 10/28/2013 21:30 | 0 |
| 11/9/2013 20:15 | 0.124594125 | 10/28/2013 21:40 | 0 |
| 11/9/2013 20:30 | 0.124594125 | 10/28/2013 21:50 | 0 |
| 11/9/2013 20:45 | 0.12742581  | 10/28/2013 22:00 | 0 |
| 11/9/2013 21:00 | 0.124594125 | 10/28/2013 22:10 | 0 |
| 11/9/2013 21:15 | 0.124594125 | 10/28/2013 22:20 | 0 |
| 11/9/2013 21:30 | 0.12176244  | 10/28/2013 22:30 | 0 |
| 11/9/2013 21:45 | 0.12176244  | 10/28/2013 22:40 | 0 |
| 11/9/2013 22:00 | 0.12176244  | 10/28/2013 22:50 | 0 |
| 11/9/2013 22:15 | 0.116099071 | 10/28/2013 23:00 | 0 |
| 11/9/2013 22:30 | 0.12176244  | 10/28/2013 23:10 | 0 |
| 11/9/2013 22:45 | 0.116099071 | 10/28/2013 23:20 | 0 |
| 11/9/2013 23:00 | 0.116099071 | 10/28/2013 23:30 | 0 |
| 11/9/2013 23:15 | 0.116099071 | 10/28/2013 23:40 | 0 |
| 11/9/2013 23:30 | 0.116099071 | 10/28/2013 23:50 | 0 |
| 11/9/2013 23:45 | 0.113267386 | 10/29/2013 0:00  | 0 |
| 11/10/2013 0:00 | 0.113267386 | 10/29/2013 0:10  | 0 |
| 11/10/2013 0:15 | 0.113267386 | 10/29/2013 0:20  | 0 |
| 11/10/2013 0:30 | 0.113267386 | 10/29/2013 0:30  | 0 |
| 11/10/2013 0:45 | 0.113267386 | 10/29/2013 0:40  | 0 |
| 11/10/2013 1:00 | 0.110435702 | 10/29/2013 0:50  | 0 |
| 11/10/2013 1:15 | 0.110435702 | 10/29/2013 1:00  | 0 |
| 11/10/2013 1:30 | 0.110435702 | 10/29/2013 1:10  | 0 |
| 11/10/2013 1:45 | 0.110435702 | 10/29/2013 1:20  | 0 |
| 11/10/2013 2:00 | 0.107604017 | 10/29/2013 1:30  | 0 |
| 11/10/2013 2:15 | 0.107604017 | 10/29/2013 1:40  | 0 |
| 11/10/2013 2:30 | 0.107604017 | 10/29/2013 1:50  | 0 |
| 11/10/2013 2:45 | 0.104772332 | 10/29/2013 2:00  | 0 |
| 11/10/2013 3:00 | 0.104772332 | 10/29/2013 2:10  | 0 |
| 11/10/2013 3:15 | 0.104772332 | 10/29/2013 2:20  | 0 |

|                  |             |                  |   |
|------------------|-------------|------------------|---|
| 11/10/2013 3:30  | 0.104772332 | 10/29/2013 2:30  | 0 |
| 11/10/2013 3:45  | 0.104772332 | 10/29/2013 2:40  | 0 |
| 11/10/2013 4:00  | 0.101940648 | 10/29/2013 2:50  | 0 |
| 11/10/2013 4:15  | 0.101940648 | 10/29/2013 3:00  | 0 |
| 11/10/2013 4:30  | 0.101940648 | 10/29/2013 3:10  | 0 |
| 11/10/2013 4:45  | 0.101940648 | 10/29/2013 3:20  | 0 |
| 11/10/2013 5:00  | 0.099108963 | 10/29/2013 3:30  | 0 |
| 11/10/2013 5:15  | 0.099108963 | 10/29/2013 3:40  | 0 |
| 11/10/2013 5:30  | 0.099108963 | 10/29/2013 3:50  | 0 |
| 11/10/2013 5:45  | 0.099108963 | 10/29/2013 4:00  | 0 |
| 11/10/2013 6:00  | 0.099108963 | 10/29/2013 4:10  | 0 |
| 11/10/2013 6:15  | 0.099108963 | 10/29/2013 4:20  | 0 |
| 11/10/2013 6:30  | 0.099108963 | 10/29/2013 4:30  | 0 |
| 11/10/2013 6:45  | 0.099108963 | 10/29/2013 4:40  | 0 |
| 11/10/2013 7:00  | 0.099108963 | 10/29/2013 4:50  | 0 |
| 11/10/2013 7:15  | 0.099108963 | 10/29/2013 5:00  | 0 |
| 11/10/2013 7:30  | 0.099108963 | 10/29/2013 5:10  | 0 |
| 11/10/2013 7:45  | 0.099108963 | 10/29/2013 5:20  | 0 |
| 11/10/2013 8:00  | 0.099108963 | 10/29/2013 5:30  | 0 |
| 11/10/2013 8:15  | 0.099108963 | 10/29/2013 5:40  | 0 |
| 11/10/2013 8:30  | 0.099108963 | 10/29/2013 5:50  | 0 |
| 11/10/2013 8:45  | 0.101940648 | 10/29/2013 6:00  | 0 |
| 11/10/2013 9:00  | 0.101940648 | 10/29/2013 6:10  | 0 |
| 11/10/2013 9:15  | 0.104772332 | 10/29/2013 6:20  | 0 |
| 11/10/2013 9:30  | 0.107604017 | 10/29/2013 6:30  | 0 |
| 11/10/2013 9:45  | 0.110435702 | 10/29/2013 6:40  | 0 |
| 11/10/2013 10:00 | 0.110435702 | 10/29/2013 6:50  | 0 |
| 11/10/2013 10:15 | 0.113267386 | 10/29/2013 7:00  | 0 |
| 11/10/2013 10:30 | 0.116099071 | 10/29/2013 7:10  | 0 |
| 11/10/2013 10:45 | 0.12176244  | 10/29/2013 7:20  | 0 |
| 11/10/2013 11:00 | 0.124594125 | 10/29/2013 7:30  | 0 |
| 11/10/2013 11:15 | 0.124594125 | 10/29/2013 7:40  | 0 |
| 11/10/2013 11:30 | 0.124594125 | 10/29/2013 7:50  | 0 |
| 11/10/2013 11:45 | 0.12742581  | 10/29/2013 8:00  | 0 |
| 11/10/2013 12:00 | 0.124594125 | 10/29/2013 8:10  | 0 |
| 11/10/2013 12:15 | 0.12742581  | 10/29/2013 8:20  | 0 |
| 11/10/2013 12:30 | 0.12742581  | 10/29/2013 8:30  | 0 |
| 11/10/2013 12:45 | 0.130257494 | 10/29/2013 8:40  | 0 |
| 11/10/2013 13:00 | 0.130257494 | 10/29/2013 8:50  | 0 |
| 11/10/2013 13:15 | 0.12742581  | 10/29/2013 9:00  | 0 |
| 11/10/2013 13:30 | 0.12742581  | 10/29/2013 9:10  | 0 |
| 11/10/2013 13:45 | 0.124594125 | 10/29/2013 9:20  | 0 |
| 11/10/2013 14:00 | 0.12742581  | 10/29/2013 9:30  | 0 |
| 11/10/2013 14:15 | 0.124594125 | 10/29/2013 9:40  | 0 |
| 11/10/2013 14:30 | 0.124594125 | 10/29/2013 9:50  | 0 |
| 11/10/2013 14:45 | 0.124594125 | 10/29/2013 10:00 | 0 |
| 11/10/2013 15:00 | 0.124594125 | 10/29/2013 10:10 | 0 |

|                  |             |                  |   |
|------------------|-------------|------------------|---|
| 11/10/2013 15:15 | 0.12176244  | 10/29/2013 10:20 | 0 |
| 11/10/2013 15:30 | 0.12176244  | 10/29/2013 10:30 | 0 |
| 11/10/2013 15:45 | 0.12176244  | 10/29/2013 10:40 | 0 |
| 11/10/2013 16:00 | 0.12176244  | 10/29/2013 10:50 | 0 |
| 11/10/2013 16:15 | 0.116099071 | 10/29/2013 11:00 | 0 |
| 11/10/2013 16:30 | 0.116099071 | 10/29/2013 11:10 | 0 |
| 11/10/2013 16:45 | 0.116099071 | 10/29/2013 11:20 | 0 |
| 11/10/2013 17:00 | 0.116099071 | 10/29/2013 11:30 | 0 |
| 11/10/2013 17:15 | 0.116099071 | 10/29/2013 11:40 | 0 |
| 11/10/2013 17:30 | 0.113267386 | 10/29/2013 11:50 | 0 |
| 11/10/2013 17:45 | 0.113267386 | 10/29/2013 12:00 | 0 |
| 11/10/2013 18:00 | 0.113267386 | 10/29/2013 12:10 | 0 |
| 11/10/2013 18:15 | 0.116099071 | 10/29/2013 12:20 | 0 |
| 11/10/2013 18:30 | 0.116099071 | 10/29/2013 12:30 | 0 |
| 11/10/2013 18:45 | 0.113267386 | 10/29/2013 12:40 | 0 |
| 11/10/2013 19:00 | 0.116099071 | 10/29/2013 12:50 | 0 |
| 11/10/2013 19:15 | 0.116099071 | 10/29/2013 13:00 | 0 |
| 11/10/2013 19:30 | 0.116099071 | 10/29/2013 13:10 | 0 |
| 11/10/2013 19:45 | 0.116099071 | 10/29/2013 13:20 | 0 |
| 11/10/2013 20:00 | 0.116099071 | 10/29/2013 13:30 | 0 |
| 11/10/2013 20:15 | 0.12176244  | 10/29/2013 13:40 | 0 |
| 11/10/2013 20:30 | 0.12176244  | 10/29/2013 13:50 | 0 |
| 11/10/2013 20:45 | 0.12176244  | 10/29/2013 14:00 | 0 |
| 11/10/2013 21:00 | 0.12176244  | 10/29/2013 14:10 | 0 |
| 11/10/2013 21:15 | 0.12176244  | 10/29/2013 14:20 | 0 |
| 11/10/2013 21:30 | 0.12176244  | 10/29/2013 14:30 | 0 |
| 11/10/2013 21:45 | 0.12176244  | 10/29/2013 14:40 | 0 |
| 11/10/2013 22:00 | 0.12176244  | 10/29/2013 14:50 | 0 |
| 11/10/2013 22:15 | 0.12176244  | 10/29/2013 15:00 | 0 |
| 11/10/2013 22:30 | 0.12176244  | 10/29/2013 15:10 | 0 |
| 11/10/2013 22:45 | 0.12176244  | 10/29/2013 15:20 | 0 |
| 11/10/2013 23:00 | 0.12176244  | 10/29/2013 15:30 | 0 |
| 11/10/2013 23:15 | 0.12176244  | 10/29/2013 15:40 | 0 |
| 11/10/2013 23:30 | 0.12176244  | 10/29/2013 15:50 | 0 |
| 11/10/2013 23:45 | 0.116099071 | 10/29/2013 16:00 | 0 |
| 11/11/2013 0:00  | 0.116099071 | 10/29/2013 16:10 | 0 |
| 11/11/2013 0:15  | 0.113267386 | 10/29/2013 16:20 | 0 |
| 11/11/2013 0:30  | 0.113267386 | 10/29/2013 16:30 | 0 |
| 11/11/2013 0:45  | 0.110435702 | 10/29/2013 16:40 | 0 |
| 11/11/2013 1:00  | 0.110435702 | 10/29/2013 16:50 | 0 |
| 11/11/2013 1:15  | 0.110435702 | 10/29/2013 17:00 | 0 |
| 11/11/2013 1:30  | 0.107604017 | 10/29/2013 17:10 | 0 |
| 11/11/2013 1:45  | 0.104772332 | 10/29/2013 17:20 | 0 |
| 11/11/2013 2:00  | 0.101940648 | 10/29/2013 17:30 | 0 |
| 11/11/2013 2:15  | 0.099108963 | 10/29/2013 17:40 | 0 |
| 11/11/2013 2:30  | 0.099108963 | 10/29/2013 17:50 | 0 |
| 11/11/2013 2:45  | 0.099108963 | 10/29/2013 18:00 | 0 |

|                  |             |                  |   |
|------------------|-------------|------------------|---|
| 11/11/2013 3:00  | 0.099108963 | 10/29/2013 18:10 | 0 |
| 11/11/2013 3:15  | 0.096277278 | 10/29/2013 18:20 | 0 |
| 11/11/2013 3:30  | 0.096277278 | 10/29/2013 18:30 | 0 |
| 11/11/2013 3:45  | 0.096277278 | 10/29/2013 18:40 | 0 |
| 11/11/2013 4:00  | 0.093445594 | 10/29/2013 18:50 | 0 |
| 11/11/2013 4:15  | 0.093445594 | 10/29/2013 19:00 | 0 |
| 11/11/2013 4:30  | 0.093445594 | 10/29/2013 19:10 | 0 |
| 11/11/2013 4:45  | 0.093445594 | 10/29/2013 19:20 | 0 |
| 11/11/2013 5:00  | 0.093445594 | 10/29/2013 19:30 | 0 |
| 11/11/2013 5:15  | 0.093445594 | 10/29/2013 19:40 | 0 |
| 11/11/2013 5:30  | 0.093445594 | 10/29/2013 19:50 | 0 |
| 11/11/2013 5:45  | 0.090613909 | 10/29/2013 20:00 | 0 |
| 11/11/2013 6:00  | 0.093445594 | 10/29/2013 20:10 | 0 |
| 11/11/2013 6:15  | 0.090613909 | 10/29/2013 20:20 | 0 |
| 11/11/2013 6:30  | 0.090613909 | 10/29/2013 20:30 | 0 |
| 11/11/2013 6:45  | 0.093445594 | 10/29/2013 20:40 | 0 |
| 11/11/2013 7:00  | 0.090613909 | 10/29/2013 20:50 | 0 |
| 11/11/2013 7:15  | 0.093445594 | 10/29/2013 21:00 | 0 |
| 11/11/2013 7:30  | 0.093445594 | 10/29/2013 21:10 | 0 |
| 11/11/2013 7:45  | 0.093445594 | 10/29/2013 21:20 | 0 |
| 11/11/2013 8:00  | 0.096277278 | 10/29/2013 21:30 | 0 |
| 11/11/2013 8:15  | 0.101940648 | 10/29/2013 21:40 | 0 |
| 11/11/2013 8:30  | 0.101940648 | 10/29/2013 21:50 | 0 |
| 11/11/2013 8:45  | 0.107604017 | 10/29/2013 22:00 | 0 |
| 11/11/2013 9:00  | 0.110435702 | 10/29/2013 22:10 | 0 |
| 11/11/2013 9:15  | 0.110435702 | 10/29/2013 22:20 | 0 |
| 11/11/2013 9:30  | 0.113267386 | 10/29/2013 22:30 | 0 |
| 11/11/2013 9:45  | 0.116099071 | 10/29/2013 22:40 | 0 |
| 11/11/2013 10:00 | 0.12176244  | 10/29/2013 22:50 | 0 |
| 11/11/2013 10:15 | 0.12176244  | 10/29/2013 23:00 | 0 |
| 11/11/2013 10:30 | 0.124594125 | 10/29/2013 23:10 | 0 |
| 11/11/2013 10:45 | 0.124594125 | 10/29/2013 23:20 | 0 |
| 11/11/2013 11:00 | 0.12176244  | 10/29/2013 23:30 | 0 |
| 11/11/2013 11:15 | 0.116099071 | 10/29/2013 23:40 | 0 |
| 11/11/2013 11:30 | 0.113267386 | 10/29/2013 23:50 | 0 |
| 11/11/2013 11:45 | 0.113267386 | 10/30/2013 0:00  | 0 |
| 11/11/2013 12:00 | 0.113267386 | 10/30/2013 0:10  | 0 |
| 11/11/2013 12:15 | 0.113267386 | 10/30/2013 0:20  | 0 |
| 11/11/2013 12:30 | 0.110435702 | 10/30/2013 0:30  | 0 |
| 11/11/2013 12:45 | 0.107604017 | 10/30/2013 0:40  | 0 |
| 11/11/2013 13:00 | 0.104772332 | 10/30/2013 0:50  | 0 |
| 11/11/2013 13:15 | 0.104772332 | 10/30/2013 1:00  | 0 |
| 11/11/2013 13:30 | 0.107604017 | 10/30/2013 1:10  | 0 |
| 11/11/2013 13:45 | 0.107604017 | 10/30/2013 1:20  | 0 |
| 11/11/2013 14:00 | 0.107604017 | 10/30/2013 1:30  | 0 |
| 11/11/2013 14:15 | 0.107604017 | 10/30/2013 1:40  | 0 |
| 11/11/2013 14:30 | 0.107604017 | 10/30/2013 1:50  | 0 |

|                  |             |                 |   |
|------------------|-------------|-----------------|---|
| 11/11/2013 14:45 | 0.107604017 | 10/30/2013 2:00 | 0 |
| 11/11/2013 15:00 | 0.107604017 | 10/30/2013 2:10 | 0 |
| 11/11/2013 15:15 | 0.107604017 | 10/30/2013 2:20 | 0 |
| 11/11/2013 15:30 | 0.107604017 | 10/30/2013 2:30 | 0 |
| 11/11/2013 15:45 | 0.104772332 | 10/30/2013 2:40 | 0 |
| 11/11/2013 16:00 | 0.104772332 | 10/30/2013 2:50 | 0 |
| 11/11/2013 16:15 | 0.101940648 | 10/30/2013 3:00 | 0 |
| 11/11/2013 16:30 | 0.101940648 | 10/30/2013 3:10 | 0 |
| 11/11/2013 16:45 | 0.104772332 | 10/30/2013 3:20 | 0 |
| 11/11/2013 17:00 | 0.104772332 | 10/30/2013 3:30 | 0 |
| 11/11/2013 17:15 | 0.101940648 | 10/30/2013 3:40 | 0 |
| 11/11/2013 17:30 | 0.101940648 | 10/30/2013 3:50 | 0 |
| 11/11/2013 17:45 | 0.101940648 | 10/30/2013 4:00 | 0 |
| 11/11/2013 18:00 | 0.099108963 | 10/30/2013 4:10 | 0 |
| 11/11/2013 18:15 | 0.099108963 | 10/30/2013 4:20 | 0 |
| 11/11/2013 18:30 | 0.101940648 | 10/30/2013 4:30 | 0 |
| 11/11/2013 18:45 | 0.101940648 | 10/30/2013 4:40 | 0 |
| 11/11/2013 19:00 | 0.101940648 | 10/30/2013 4:50 | 0 |
| 11/11/2013 19:15 | 0.101940648 | 10/30/2013 5:00 | 0 |
| 11/11/2013 19:30 | 0.101940648 | 10/30/2013 5:10 | 0 |
| 11/11/2013 19:45 | 0.104772332 | 10/30/2013 5:20 | 0 |
| 11/11/2013 20:00 | 0.104772332 | 10/30/2013 5:30 | 0 |
| 11/11/2013 20:15 | 0.107604017 | 10/30/2013 5:40 | 0 |
| 11/11/2013 20:30 | 0.107604017 | 10/30/2013 5:50 | 0 |
| 11/11/2013 20:45 | 0.107604017 | 10/30/2013 6:00 | 0 |
| 11/11/2013 21:00 | 0.107604017 | 10/30/2013 6:10 | 0 |
| 11/11/2013 21:15 | 0.107604017 | 10/30/2013 6:20 | 0 |
| 11/11/2013 21:30 | 0.107604017 | 10/30/2013 6:30 | 0 |
| 11/11/2013 21:45 | 0.107604017 | 10/30/2013 6:40 | 0 |
| 11/11/2013 22:00 | 0.110435702 | 10/30/2013 6:50 | 0 |
| 11/11/2013 22:15 | 0.107604017 | 10/30/2013 7:00 | 0 |
| 11/11/2013 22:30 | 0.107604017 | 10/30/2013 7:10 | 0 |
| 11/11/2013 22:45 | 0.107604017 | 10/30/2013 7:20 | 0 |
| 11/11/2013 23:00 | 0.107604017 | 10/30/2013 7:30 | 0 |
| 11/11/2013 23:15 | 0.110435702 | 10/30/2013 7:40 | 0 |
| 11/11/2013 23:30 | 0.107604017 | 10/30/2013 7:50 | 0 |
| 11/11/2013 23:45 | 0.107604017 | 10/30/2013 8:00 | 0 |
| 11/12/2013 0:00  | 0.104772332 | 10/30/2013 8:10 | 0 |
| 11/12/2013 0:15  | 0.104772332 | 10/30/2013 8:20 | 0 |
| 11/12/2013 0:30  | 0.104772332 | 10/30/2013 8:30 | 0 |
| 11/12/2013 0:45  | 0.101940648 | 10/30/2013 8:40 | 0 |
| 11/12/2013 1:00  | 0.101940648 | 10/30/2013 8:50 | 0 |
| 11/12/2013 1:15  | 0.101940648 | 10/30/2013 9:00 | 0 |
| 11/12/2013 1:30  | 0.099108963 | 10/30/2013 9:10 | 0 |
| 11/12/2013 1:45  | 0.099108963 | 10/30/2013 9:20 | 0 |
| 11/12/2013 2:00  | 0.096277278 | 10/30/2013 9:30 | 0 |
| 11/12/2013 2:15  | 0.093445594 | 10/30/2013 9:40 | 0 |

|                  |             |                  |        |
|------------------|-------------|------------------|--------|
| 11/12/2013 2:30  | 0.093445594 | 10/30/2013 9:50  | 0      |
| 11/12/2013 2:45  | 0.090613909 | 10/30/2013 10:00 | 0.0254 |
| 11/12/2013 3:00  | 0.090613909 | 10/30/2013 10:10 | 0.127  |
| 11/12/2013 3:15  | 0.087782224 | 10/30/2013 10:20 | 0.2794 |
| 11/12/2013 3:30  | 0.087782224 | 10/30/2013 10:30 | 0.3048 |
| 11/12/2013 3:45  | 0.087782224 | 10/30/2013 10:40 | 0.381  |
| 11/12/2013 4:00  | 0.087782224 | 10/30/2013 10:50 | 0.6096 |
| 11/12/2013 4:15  | 0.08495054  | 10/30/2013 11:00 | 0.6604 |
| 11/12/2013 4:30  | 0.08495054  | 10/30/2013 11:10 | 0.8382 |
| 11/12/2013 4:45  | 0.08495054  | 10/30/2013 11:20 | 1.0922 |
| 11/12/2013 5:00  | 0.08495054  | 10/30/2013 11:30 | 1.1684 |
| 11/12/2013 5:15  | 0.08495054  | 10/30/2013 11:40 | 1.2192 |
| 11/12/2013 5:30  | 0.082118855 | 10/30/2013 11:50 | 1.3462 |
| 11/12/2013 5:45  | 0.082118855 | 10/30/2013 12:00 | 1.4224 |
| 11/12/2013 6:00  | 0.082118855 | 10/30/2013 12:10 | 1.4732 |
| 11/12/2013 6:15  | 0.082118855 | 10/30/2013 12:20 | 1.5748 |
| 11/12/2013 6:30  | 0.082118855 | 10/30/2013 12:30 | 1.651  |
| 11/12/2013 6:45  | 0.082118855 | 10/30/2013 12:40 | 1.6764 |
| 11/12/2013 7:00  | 0.082118855 | 10/30/2013 12:50 | 1.7018 |
| 11/12/2013 7:15  | 0.082118855 | 10/30/2013 13:00 | 1.7018 |
| 11/12/2013 7:30  | 0.082118855 | 10/30/2013 13:10 | 1.7018 |
| 11/12/2013 7:45  | 0.07928717  | 10/30/2013 13:20 | 1.7018 |
| 11/12/2013 8:00  | 0.08495054  | 10/30/2013 13:30 | 1.7018 |
| 11/12/2013 8:15  | 0.093445594 | 10/30/2013 13:40 | 1.7018 |
| 11/12/2013 8:30  | 0.096277278 | 10/30/2013 13:50 | 1.7018 |
| 11/12/2013 8:45  | 0.099108963 | 10/30/2013 14:00 | 1.7018 |
| 11/12/2013 9:00  | 0.104772332 | 10/30/2013 14:10 | 1.7018 |
| 11/12/2013 9:15  | 0.107604017 | 10/30/2013 14:20 | 1.7018 |
| 11/12/2013 9:30  | 0.110435702 | 10/30/2013 14:30 | 1.7018 |
| 11/12/2013 9:45  | 0.107604017 | 10/30/2013 14:40 | 1.7018 |
| 11/12/2013 10:00 | 0.110435702 | 10/30/2013 14:50 | 1.7018 |
| 11/12/2013 10:15 | 0.110435702 | 10/30/2013 15:00 | 1.7018 |
| 11/12/2013 10:30 | 0.110435702 | 10/30/2013 15:10 | 1.7018 |
| 11/12/2013 10:45 | 0.110435702 | 10/30/2013 15:20 | 1.7018 |
| 11/12/2013 11:00 | 0.110435702 | 10/30/2013 15:30 | 1.7018 |
| 11/12/2013 11:15 | 0.113267386 | 10/30/2013 15:40 | 1.7018 |
| 11/12/2013 11:30 | 0.116099071 | 10/30/2013 15:50 | 1.7018 |
| 11/12/2013 11:45 | 0.116099071 | 10/30/2013 16:00 | 1.7018 |
| 11/12/2013 12:00 | 0.113267386 | 10/30/2013 16:10 | 1.7018 |
| 11/12/2013 12:15 | 0.113267386 | 10/30/2013 16:20 | 1.7018 |
| 11/12/2013 12:30 | 0.107604017 | 10/30/2013 16:30 | 1.7018 |
| 11/12/2013 12:45 | 0.107604017 | 10/30/2013 16:40 | 1.7018 |
| 11/12/2013 13:00 | 0.104772332 | 10/30/2013 16:50 | 1.7018 |
| 11/12/2013 13:15 | 0.104772332 | 10/30/2013 17:00 | 1.7018 |
| 11/12/2013 13:30 | 0.099108963 | 10/30/2013 17:10 | 1.7018 |
| 11/12/2013 13:45 | 0.099108963 | 10/30/2013 17:20 | 1.7018 |
| 11/12/2013 14:00 | 0.099108963 | 10/30/2013 17:30 | 1.7018 |

|                  |             |                  |        |
|------------------|-------------|------------------|--------|
| 11/12/2013 14:15 | 0.096277278 | 10/30/2013 17:40 | 1.7018 |
| 11/12/2013 14:30 | 0.096277278 | 10/30/2013 17:50 | 1.7018 |
| 11/12/2013 14:45 | 0.096277278 | 10/30/2013 18:00 | 1.7018 |
| 11/12/2013 15:00 | 0.096277278 | 10/30/2013 18:10 | 1.7018 |
| 11/12/2013 15:15 | 0.096277278 | 10/30/2013 18:20 | 1.7018 |
| 11/12/2013 15:30 | 0.096277278 | 10/30/2013 18:30 | 1.7018 |
| 11/12/2013 15:45 | 0.096277278 | 10/30/2013 18:40 | 1.7018 |
| 11/12/2013 16:00 | 0.093445594 | 10/30/2013 18:50 | 1.7018 |
| 11/12/2013 16:15 | 0.096277278 | 10/30/2013 19:00 | 1.7018 |
| 11/12/2013 16:30 | 0.093445594 | 10/30/2013 19:10 | 1.7018 |
| 11/12/2013 16:45 | 0.093445594 | 10/30/2013 19:20 | 1.7018 |
| 11/12/2013 17:00 | 0.090613909 | 10/30/2013 19:30 | 1.7018 |
| 11/12/2013 17:15 | 0.090613909 | 10/30/2013 19:40 | 1.7018 |
| 11/12/2013 17:30 | 0.090613909 | 10/30/2013 19:50 | 1.7018 |
| 11/12/2013 17:45 | 0.08495054  | 10/30/2013 20:00 | 1.7018 |
| 11/12/2013 18:00 | 0.082118855 | 10/30/2013 20:10 | 1.7018 |
| 11/12/2013 18:15 | 0.07928717  | 10/30/2013 20:20 | 1.7018 |
| 11/12/2013 18:30 | 0.076455486 | 10/30/2013 20:30 | 1.7018 |
| 11/12/2013 18:45 | 0.076455486 | 10/30/2013 20:40 | 1.7018 |
| 11/12/2013 19:00 | 0.076455486 | 10/30/2013 20:50 | 1.7018 |
| 11/12/2013 19:15 | 0.073623801 | 10/30/2013 21:00 | 1.7018 |
| 11/12/2013 19:30 | 0.076455486 | 10/30/2013 21:10 | 1.7018 |
| 11/12/2013 19:45 | 0.073623801 | 10/30/2013 21:20 | 1.7018 |
| 11/12/2013 20:00 | 0.073623801 | 10/30/2013 21:30 | 1.7018 |
| 11/12/2013 20:15 | 0.073623801 | 10/30/2013 21:40 | 1.7018 |
| 11/12/2013 20:30 | 0.076455486 | 10/30/2013 21:50 | 1.7018 |
| 11/12/2013 20:45 | 0.076455486 | 10/30/2013 22:00 | 1.7018 |
| 11/12/2013 21:00 | 0.073623801 | 10/30/2013 22:10 | 1.7018 |
| 11/12/2013 21:15 | 0.076455486 | 10/30/2013 22:20 | 1.7018 |
| 11/12/2013 21:30 | 0.076455486 | 10/30/2013 22:30 | 1.7018 |
| 11/12/2013 21:45 | 0.076455486 | 10/30/2013 22:40 | 1.7018 |
| 11/12/2013 22:00 | 0.076455486 | 10/30/2013 22:50 | 1.7018 |
| 11/12/2013 22:15 | 0.076455486 | 10/30/2013 23:00 | 1.7018 |
| 11/12/2013 22:30 | 0.07928717  | 10/30/2013 23:10 | 1.7272 |
| 11/12/2013 22:45 | 0.07928717  | 10/30/2013 23:20 | 1.7272 |
| 11/12/2013 23:00 | 0.07928717  | 10/30/2013 23:30 | 1.7272 |
| 11/12/2013 23:15 | 0.076455486 | 10/30/2013 23:40 | 1.7272 |
| 11/12/2013 23:30 | 0.076455486 | 10/30/2013 23:50 | 1.7272 |
| 11/12/2013 23:45 | 0.076455486 | 10/31/2013 0:00  | 1.7272 |
| 11/13/2013 0:00  | 0.073623801 | 10/31/2013 0:10  | 0      |
| 11/13/2013 0:15  | 0.076455486 | 10/31/2013 0:20  | 0      |
| 11/13/2013 0:30  | 0.076455486 | 10/31/2013 0:30  | 0      |
| 11/13/2013 0:45  | 0.076455486 | 10/31/2013 0:40  | 0      |
| 11/13/2013 1:00  | 0.073623801 | 10/31/2013 0:50  | 0      |
| 11/13/2013 1:15  | 0.073623801 | 10/31/2013 1:10  | 0      |
| 11/13/2013 1:30  | 0.073623801 | 10/31/2013 1:20  | 0      |
| 11/13/2013 1:45  | 0.073623801 | 10/31/2013 1:30  | 0      |



|                  |             |                 |        |
|------------------|-------------|-----------------|--------|
| 11/13/2013 2:00  | 0.073623801 | 10/31/2013 1:40 | 0      |
| 11/13/2013 2:15  | 0.073623801 | 10/31/2013 1:50 | 0      |
| 11/13/2013 2:30  | 0.070792117 | 10/31/2013 2:00 | 0.0254 |
| 11/13/2013 2:45  | 0.070792117 | 10/31/2013 2:10 | 0.0254 |
| 11/13/2013 3:00  | 0.070792117 | 10/31/2013 2:20 | 0.0254 |
| 11/13/2013 3:15  | 0.070792117 | 10/31/2013 2:30 | 0.0254 |
| 11/13/2013 3:30  | 0.067960432 | 10/31/2013 2:40 | 0.0254 |
| 11/13/2013 3:45  | 0.067960432 | 10/31/2013 2:50 | 0.0254 |
| 11/13/2013 4:00  | 0.067960432 | 10/31/2013 3:00 | 0.0254 |
| 11/13/2013 4:15  | 0.067960432 | 10/31/2013 3:10 | 0.0254 |
| 11/13/2013 4:30  | 0.067960432 | 10/31/2013 3:20 | 0.0254 |
| 11/13/2013 4:45  | 0.065128747 | 10/31/2013 3:30 | 0.0254 |
| 11/13/2013 5:00  | 0.067960432 | 10/31/2013 3:40 | 0.0254 |
| 11/13/2013 5:15  | 0.065128747 | 10/31/2013 3:50 | 0.0254 |
| 11/13/2013 5:30  | 0.065128747 | 10/31/2013 4:00 | 0.0254 |
| 11/13/2013 5:45  | 0.065128747 | 10/31/2013 4:10 | 0.0254 |
| 11/13/2013 6:00  | 0.065128747 | 10/31/2013 4:20 | 0.0254 |
| 11/13/2013 6:15  | 0.065128747 | 10/31/2013 4:30 | 0.0254 |
| 11/13/2013 6:30  | 0.065128747 | 10/31/2013 4:40 | 0.0254 |
| 11/13/2013 6:45  | 0.065128747 | 10/31/2013 4:50 | 0.0254 |
| 11/13/2013 7:00  | 0.065128747 | 10/31/2013 5:00 | 0.0254 |
| 11/13/2013 7:15  | 0.065128747 | 10/31/2013 5:10 | 0.0254 |
| 11/13/2013 7:30  | 0.067960432 | 10/31/2013 5:20 | 0.0254 |
| 11/13/2013 7:45  | 0.070792117 | 10/31/2013 5:30 | 0.0254 |
| 11/13/2013 8:00  | 0.07928717  | 10/31/2013 5:40 | 0.0254 |
| 11/13/2013 8:15  | 0.096277278 | 10/31/2013 5:50 | 0.0254 |
| 11/13/2013 8:30  | 0.104772332 | 10/31/2013 6:00 | 0.0254 |
| 11/13/2013 8:45  | 0.107604017 | 10/31/2013 6:10 | 0.0254 |
| 11/13/2013 9:00  | 0.110435702 | 10/31/2013 6:20 | 0.0254 |
| 11/13/2013 9:15  | 0.116099071 | 10/31/2013 6:30 | 0.0254 |
| 11/13/2013 9:30  | 0.12176244  | 10/31/2013 6:40 | 0.0254 |
| 11/13/2013 9:45  | 0.124594125 | 10/31/2013 6:50 | 0.0254 |
| 11/13/2013 10:00 | 0.12742581  | 10/31/2013 7:00 | 0.0254 |
| 11/13/2013 10:15 | 0.124594125 | 10/31/2013 7:10 | 0.0254 |
| 11/13/2013 10:30 | 0.124594125 | 10/31/2013 7:20 | 0.0254 |
| 11/13/2013 10:45 | 0.12742581  | 10/31/2013 7:30 | 0.0254 |
| 11/13/2013 11:00 | 0.12742581  | 10/31/2013 7:40 | 0.0254 |
| 11/13/2013 11:15 | 0.124594125 | 10/31/2013 7:50 | 0.0254 |
| 11/13/2013 11:30 | 0.12176244  | 10/31/2013 8:00 | 0.0254 |
| 11/13/2013 11:45 | 0.116099071 | 10/31/2013 8:10 | 0.0254 |
| 11/13/2013 12:00 | 0.110435702 | 10/31/2013 8:20 | 0.0254 |
| 11/13/2013 12:15 | 0.101940648 | 10/31/2013 8:30 | 0.0254 |
| 11/13/2013 12:30 | 0.093445594 | 10/31/2013 8:40 | 0.0254 |
| 11/13/2013 12:45 | 0.08495054  | 10/31/2013 8:50 | 0.0254 |
| 11/13/2013 13:00 | 0.07928717  | 10/31/2013 9:00 | 0.0254 |
| 11/13/2013 13:15 | 0.076455486 | 10/31/2013 9:10 | 0.0254 |
| 11/13/2013 13:30 | 0.073623801 | 10/31/2013 9:20 | 0.0254 |

|                  |             |                  |        |
|------------------|-------------|------------------|--------|
| 11/13/2013 13:45 | 0.073623801 | 10/31/2013 9:30  | 0.0254 |
| 11/13/2013 14:00 | 0.073623801 | 10/31/2013 9:40  | 0.0254 |
| 11/13/2013 14:15 | 0.076455486 | 10/31/2013 9:50  | 0.0254 |
| 11/13/2013 14:30 | 0.07928717  | 10/31/2013 10:00 | 0.0254 |
| 11/13/2013 14:45 | 0.07928717  | 10/31/2013 10:10 | 0.0254 |
| 11/13/2013 15:00 | 0.082118855 | 10/31/2013 10:20 | 0.0254 |
| 11/13/2013 15:15 | 0.082118855 | 10/31/2013 10:30 | 0.0254 |
| 11/13/2013 15:30 | 0.07928717  | 10/31/2013 10:40 | 0.0254 |
| 11/13/2013 15:45 | 0.082118855 | 10/31/2013 10:50 | 0.0254 |
| 11/13/2013 16:00 | 0.076455486 | 10/31/2013 11:00 | 0.0254 |
| 11/13/2013 16:15 | 0.073623801 | 10/31/2013 11:10 | 0.0254 |
| 11/13/2013 16:30 | 0.070792117 | 10/31/2013 11:20 | 0.0254 |
| 11/13/2013 16:45 | 0.067960432 | 10/31/2013 11:30 | 0.0254 |
| 11/13/2013 17:00 | 0.067960432 | 10/31/2013 11:40 | 0.0254 |
| 11/13/2013 17:15 | 0.067960432 | 10/31/2013 11:50 | 0.0254 |
| 11/13/2013 17:30 | 0.067960432 | 10/31/2013 12:00 | 0.0254 |
| 11/13/2013 17:45 | 0.067960432 | 10/31/2013 12:10 | 0.0254 |
| 11/13/2013 18:00 | 0.067960432 | 10/31/2013 12:20 | 0.0254 |
| 11/13/2013 18:15 | 0.067960432 | 10/31/2013 12:30 | 0.0254 |
| 11/13/2013 18:30 | 0.067960432 | 10/31/2013 12:40 | 0.0254 |
| 11/13/2013 18:45 | 0.067960432 | 10/31/2013 12:50 | 0.0254 |
| 11/13/2013 19:00 | 0.067960432 | 10/31/2013 13:00 | 0.0254 |
| 11/13/2013 19:15 | 0.067960432 | 10/31/2013 13:10 | 0.0254 |
| 11/13/2013 19:30 | 0.067960432 | 10/31/2013 13:20 | 0.0254 |
| 11/13/2013 19:45 | 0.067960432 | 10/31/2013 13:30 | 0.0254 |
| 11/13/2013 20:00 | 0.067960432 | 10/31/2013 13:40 | 0.0254 |
| 11/13/2013 20:15 | 0.067960432 | 10/31/2013 13:50 | 0.0254 |
| 11/13/2013 20:30 | 0.067960432 | 10/31/2013 14:00 | 0.0254 |
| 11/13/2013 20:45 | 0.067960432 | 10/31/2013 14:10 | 0.0254 |
| 11/13/2013 21:00 | 0.067960432 | 10/31/2013 14:20 | 0.0254 |
| 11/13/2013 21:15 | 0.067960432 | 10/31/2013 14:30 | 0.0254 |
| 11/13/2013 21:30 | 0.067960432 | 10/31/2013 14:40 | 0.0254 |
| 11/13/2013 21:45 | 0.067960432 | 10/31/2013 14:50 | 0.0254 |
| 11/13/2013 22:00 | 0.067960432 | 10/31/2013 15:00 | 0.0254 |
| 11/13/2013 22:15 | 0.067960432 | 10/31/2013 15:10 | 0.0254 |
| 11/13/2013 22:30 | 0.067960432 | 10/31/2013 15:20 | 0.0254 |
| 11/13/2013 22:45 | 0.067960432 | 10/31/2013 15:30 | 0.0254 |
| 11/13/2013 23:00 | 0.067960432 | 10/31/2013 15:40 | 0.0254 |
| 11/13/2013 23:15 | 0.067960432 | 10/31/2013 15:50 | 0.0254 |
| 11/13/2013 23:30 | 0.067960432 | 10/31/2013 16:00 | 0.0254 |
| 11/13/2013 23:45 | 0.065128747 | 10/31/2013 16:10 | 0.0254 |
| 11/14/2013 0:00  | 0.065128747 | 10/31/2013 16:20 | 0.0254 |
| 11/14/2013 0:15  | 0.062297063 | 10/31/2013 16:30 | 0.0254 |
| 11/14/2013 0:30  | 0.062297063 | 10/31/2013 16:40 | 0.0254 |
| 11/14/2013 0:45  | 0.062297063 | 10/31/2013 16:50 | 0.0254 |
| 11/14/2013 1:00  | 0.062297063 | 10/31/2013 17:00 | 0.0254 |
| 11/14/2013 1:15  | 0.062297063 | 10/31/2013 17:10 | 0.0254 |

|                  |             |                  |        |
|------------------|-------------|------------------|--------|
| 11/14/2013 1:30  | 0.062297063 | 10/31/2013 17:20 | 0.0254 |
| 11/14/2013 1:45  | 0.062297063 | 10/31/2013 17:30 | 0.0254 |
| 11/14/2013 2:00  | 0.062297063 | 10/31/2013 17:40 | 0.0254 |
| 11/14/2013 2:15  | 0.062297063 | 10/31/2013 17:50 | 0.0254 |
| 11/14/2013 2:30  | 0.062297063 | 10/31/2013 18:00 | 0.0254 |
| 11/14/2013 2:45  | 0.062297063 | 10/31/2013 18:10 | 0.0254 |
| 11/14/2013 3:00  | 0.062297063 | 10/31/2013 18:20 | 0.0254 |
| 11/14/2013 3:15  | 0.062297063 | 10/31/2013 18:30 | 0.0254 |
| 11/14/2013 3:30  | 0.062297063 | 10/31/2013 18:40 | 0.0254 |
| 11/14/2013 3:45  | 0.062297063 | 10/31/2013 18:50 | 0.0254 |
| 11/14/2013 4:00  | 0.062297063 | 10/31/2013 19:00 | 0.0254 |
| 11/14/2013 4:15  | 0.062297063 | 10/31/2013 19:10 | 0.0254 |
| 11/14/2013 4:30  | 0.062297063 | 10/31/2013 19:20 | 0.0254 |
| 11/14/2013 4:45  | 0.062297063 | 10/31/2013 19:30 | 0.0254 |
| 11/14/2013 5:00  | 0.059465378 | 10/31/2013 19:40 | 0.0254 |
| 11/14/2013 5:15  | 0.059465378 | 10/31/2013 19:50 | 0.0254 |
| 11/14/2013 5:30  | 0.062297063 | 10/31/2013 20:00 | 0.0254 |
| 11/14/2013 5:45  | 0.059465378 | 10/31/2013 20:10 | 0.0254 |
| 11/14/2013 6:00  | 0.059465378 | 10/31/2013 20:20 | 0.0254 |
| 11/14/2013 6:15  | 0.059465378 | 10/31/2013 20:30 | 0.0254 |
| 11/14/2013 6:30  | 0.059465378 | 10/31/2013 20:40 | 0.0254 |
| 11/14/2013 6:45  | 0.056633693 | 10/31/2013 20:50 | 0.0254 |
| 11/14/2013 7:00  | 0.056633693 | 10/31/2013 21:00 | 0.0254 |
| 11/14/2013 7:15  | 0.056633693 | 10/31/2013 21:10 | 0.0254 |
| 11/14/2013 7:30  | 0.056633693 | 10/31/2013 21:20 | 0.0254 |
| 11/14/2013 7:45  | 0.056633693 | 10/31/2013 21:30 | 0.0254 |
| 11/14/2013 8:00  | 0.056633693 | 10/31/2013 21:40 | 0.0254 |
| 11/14/2013 8:15  | 0.056633693 | 10/31/2013 21:50 | 0.0254 |
| 11/14/2013 8:30  | 0.056633693 | 10/31/2013 22:00 | 0.0254 |
| 11/14/2013 8:45  | 0.056633693 | 10/31/2013 22:10 | 0.0254 |
| 11/14/2013 9:00  | 0.056633693 | 10/31/2013 22:20 | 0.0254 |
| 11/14/2013 9:15  | 0.056633693 | 10/31/2013 22:30 | 0.0254 |
| 11/14/2013 9:30  | 0.056633693 | 10/31/2013 22:40 | 0.0254 |
| 11/14/2013 9:45  | 0.062297063 | 10/31/2013 22:50 | 0.0254 |
| 11/14/2013 10:00 | 0.062297063 | 10/31/2013 23:00 | 0.0254 |
| 11/14/2013 10:15 | 0.059465378 | 10/31/2013 23:10 | 0.0254 |
| 11/14/2013 10:30 | 0.059465378 | 10/31/2013 23:20 | 0.0254 |
| 11/14/2013 10:45 | 0.056633693 | 10/31/2013 23:30 | 0.0254 |
| 11/14/2013 11:00 | 0.056633693 | 10/31/2013 23:40 | 0.0254 |
| 11/14/2013 11:15 | 0.056633693 | 10/31/2013 23:50 | 0.0254 |
| 11/14/2013 11:30 | 0.056633693 | 11/1/2013 0:00   | 0.0254 |
| 11/14/2013 11:45 | 0.056633693 | 11/1/2013 0:10   | 0      |
| 11/14/2013 12:00 | 0.056633693 | 11/1/2013 0:20   | 0      |
| 11/14/2013 12:15 | 0.056633693 | 11/1/2013 0:30   | 0      |
| 11/14/2013 12:30 | 0.056633693 | 11/1/2013 0:40   | 0      |
| 11/14/2013 12:45 | 0.056633693 | 11/1/2013 0:50   | 0      |
| 11/14/2013 13:00 | 0.056633693 | 11/1/2013 1:00   | 0      |

|                  |             |                 |   |
|------------------|-------------|-----------------|---|
| 11/14/2013 13:15 | 0.053802009 | 11/1/2013 1:10  | 0 |
| 11/14/2013 13:30 | 0.056633693 | 11/1/2013 1:20  | 0 |
| 11/14/2013 13:45 | 0.056633693 | 11/1/2013 1:30  | 0 |
| 11/14/2013 14:00 | 0.056633693 | 11/1/2013 1:40  | 0 |
| 11/14/2013 14:15 | 0.053802009 | 11/1/2013 1:50  | 0 |
| 11/14/2013 14:30 | 0.053802009 | 11/1/2013 2:00  | 0 |
| 11/14/2013 14:45 | 0.050970324 | 11/1/2013 2:10  | 0 |
| 11/14/2013 15:00 | 0.050970324 | 11/1/2013 2:20  | 0 |
| 11/14/2013 15:15 | 0.050970324 | 11/1/2013 2:30  | 0 |
| 11/14/2013 15:30 | 0.050970324 | 11/1/2013 2:40  | 0 |
| 11/14/2013 15:45 | 0.050970324 | 11/1/2013 2:50  | 0 |
| 11/14/2013 16:00 | 0.053802009 | 11/1/2013 3:00  | 0 |
| 11/14/2013 16:15 | 0.050970324 | 11/1/2013 3:10  | 0 |
| 11/14/2013 16:30 | 0.050970324 | 11/1/2013 3:20  | 0 |
| 11/14/2013 16:45 | 0.053802009 | 11/1/2013 3:30  | 0 |
| 11/14/2013 17:00 | 0.050970324 | 11/1/2013 3:40  | 0 |
| 11/14/2013 17:15 | 0.053802009 | 11/1/2013 3:50  | 0 |
| 11/14/2013 17:30 | 0.050970324 | 11/1/2013 4:00  | 0 |
| 11/14/2013 17:45 | 0.053802009 | 11/1/2013 4:10  | 0 |
| 11/14/2013 18:00 | 0.050970324 | 11/1/2013 4:20  | 0 |
| 11/14/2013 18:15 | 0.050970324 | 11/1/2013 4:30  | 0 |
| 11/14/2013 18:30 | 0.050970324 | 11/1/2013 4:40  | 0 |
| 11/14/2013 18:45 | 0.050970324 | 11/1/2013 4:50  | 0 |
| 11/14/2013 19:00 | 0.050970324 | 11/1/2013 5:00  | 0 |
| 11/14/2013 19:15 | 0.050970324 | 11/1/2013 5:10  | 0 |
| 11/14/2013 19:30 | 0.050970324 | 11/1/2013 5:20  | 0 |
| 11/14/2013 19:45 | 0.050970324 | 11/1/2013 5:30  | 0 |
| 11/14/2013 20:00 | 0.053802009 | 11/1/2013 5:40  | 0 |
| 11/14/2013 20:15 | 0.050970324 | 11/1/2013 5:50  | 0 |
| 11/14/2013 20:30 | 0.050970324 | 11/1/2013 6:00  | 0 |
| 11/14/2013 20:45 | 0.053802009 | 11/1/2013 6:10  | 0 |
| 11/14/2013 21:00 | 0.050970324 | 11/1/2013 6:20  | 0 |
| 11/14/2013 21:15 | 0.050970324 | 11/1/2013 6:30  | 0 |
| 11/14/2013 21:30 | 0.050970324 | 11/1/2013 6:40  | 0 |
| 11/14/2013 21:45 | 0.050970324 | 11/1/2013 6:50  | 0 |
| 11/14/2013 22:00 | 0.050970324 | 11/1/2013 7:00  | 0 |
| 11/14/2013 22:15 | 0.050970324 | 11/1/2013 7:10  | 0 |
| 11/14/2013 22:30 | 0.050970324 | 11/1/2013 7:20  | 0 |
| 11/14/2013 22:45 | 0.050970324 | 11/1/2013 7:30  | 0 |
| 11/14/2013 23:00 | 0.050970324 | 11/1/2013 7:40  | 0 |
| 11/14/2013 23:15 | 0.050970324 | 11/1/2013 7:50  | 0 |
| 11/14/2013 23:30 | 0.050970324 | 11/1/2013 8:00  | 0 |
| 11/14/2013 23:45 | 0.053802009 | 11/1/2013 8:20  | 0 |
| 11/15/2013 0:00  | 0.050970324 | 11/1/2013 8:30  | 0 |
| 11/15/2013 0:15  | 0.050970324 | 11/1/2013 8:40  | 0 |
| 11/15/2013 0:30  | 0.050970324 | 11/1/2013 8:50  | 0 |
| 11/15/2013 0:45  | 0.050970324 | 11/1/2013 10:10 | 0 |

|                  |             |                 |   |
|------------------|-------------|-----------------|---|
| 11/15/2013 1:00  | 0.050970324 | 11/1/2013 10:20 | 0 |
| 11/15/2013 1:15  | 0.050970324 | 11/1/2013 10:30 | 0 |
| 11/15/2013 1:30  | 0.050970324 | 11/1/2013 10:40 | 0 |
| 11/15/2013 1:45  | 0.050970324 | 11/1/2013 10:50 | 0 |
| 11/15/2013 2:00  | 0.050970324 | 11/1/2013 11:00 | 0 |
| 11/15/2013 2:15  | 0.050970324 | 11/1/2013 11:10 | 0 |
| 11/15/2013 2:30  | 0.050970324 | 11/1/2013 11:20 | 0 |
| 11/15/2013 2:45  | 0.050970324 | 11/1/2013 11:30 | 0 |
| 11/15/2013 3:00  | 0.050970324 | 11/1/2013 11:40 | 0 |
| 11/15/2013 3:15  | 0.050970324 | 11/1/2013 11:50 | 0 |
| 11/15/2013 3:30  | 0.050970324 | 11/1/2013 12:00 | 0 |
| 11/15/2013 3:45  | 0.050970324 | 11/1/2013 12:10 | 0 |
| 11/15/2013 4:00  | 0.050970324 | 11/1/2013 12:20 | 0 |
| 11/15/2013 4:15  | 0.050970324 | 11/1/2013 12:30 | 0 |
| 11/15/2013 4:30  | 0.050970324 | 11/1/2013 12:40 | 0 |
| 11/15/2013 4:45  | 0.050970324 | 11/1/2013 12:50 | 0 |
| 11/15/2013 5:00  | 0.050970324 | 11/1/2013 13:00 | 0 |
| 11/15/2013 5:15  | 0.048138639 | 11/1/2013 13:10 | 0 |
| 11/15/2013 5:30  | 0.048138639 | 11/1/2013 13:20 | 0 |
| 11/15/2013 5:45  | 0.048138639 | 11/1/2013 13:30 | 0 |
| 11/15/2013 6:00  | 0.048138639 | 11/1/2013 13:40 | 0 |
| 11/15/2013 6:15  | 0.048138639 | 11/1/2013 13:50 | 0 |
| 11/15/2013 6:30  | 0.048138639 | 11/1/2013 14:00 | 0 |
| 11/15/2013 6:45  | 0.050970324 | 11/1/2013 14:10 | 0 |
| 11/15/2013 7:00  | 0.048138639 | 11/1/2013 14:20 | 0 |
| 11/15/2013 7:15  | 0.050970324 | 11/1/2013 14:30 | 0 |
| 11/15/2013 7:30  | 0.050970324 | 11/1/2013 14:40 | 0 |
| 11/15/2013 7:45  | 0.050970324 | 11/1/2013 14:50 | 0 |
| 11/15/2013 8:00  | 0.048138639 | 11/1/2013 15:00 | 0 |
| 11/15/2013 8:15  | 0.050970324 | 11/1/2013 15:10 | 0 |
| 11/15/2013 8:30  | 0.056633693 | 11/1/2013 15:20 | 0 |
| 11/15/2013 8:45  | 0.065128747 | 11/1/2013 15:30 | 0 |
| 11/15/2013 9:00  | 0.067960432 | 11/1/2013 15:40 | 0 |
| 11/15/2013 9:15  | 0.065128747 | 11/1/2013 15:50 | 0 |
| 11/15/2013 9:30  | 0.065128747 | 11/1/2013 16:00 | 0 |
| 11/15/2013 9:45  | 0.070792117 | 11/1/2013 16:10 | 0 |
| 11/15/2013 10:00 | 0.073623801 | 11/1/2013 16:20 | 0 |
| 11/15/2013 10:15 | 0.073623801 | 11/1/2013 16:30 | 0 |
| 11/15/2013 10:30 | 0.073623801 | 11/1/2013 16:40 | 0 |
| 11/15/2013 10:45 | 0.070792117 | 11/1/2013 16:50 | 0 |
| 11/15/2013 11:00 | 0.070792117 | 11/1/2013 17:00 | 0 |
| 11/15/2013 11:15 | 0.070792117 | 11/1/2013 17:10 | 0 |
| 11/15/2013 11:30 | 0.073623801 | 11/1/2013 17:20 | 0 |
| 11/15/2013 11:45 | 0.073623801 | 11/1/2013 17:30 | 0 |
| 11/15/2013 12:00 | 0.070792117 | 11/1/2013 17:40 | 0 |
| 11/15/2013 12:15 | 0.067960432 | 11/1/2013 17:50 | 0 |
| 11/15/2013 12:30 | 0.067960432 | 11/1/2013 18:00 | 0 |

|                  |             |                 |   |
|------------------|-------------|-----------------|---|
| 11/15/2013 12:45 | 0.070792117 | 11/1/2013 18:10 | 0 |
| 11/15/2013 13:00 | 0.070792117 | 11/1/2013 18:20 | 0 |
| 11/15/2013 13:15 | 0.070792117 | 11/1/2013 18:30 | 0 |
| 11/15/2013 13:30 | 0.067960432 | 11/1/2013 18:40 | 0 |
| 11/15/2013 13:45 | 0.065128747 | 11/1/2013 18:50 | 0 |
| 11/15/2013 14:00 | 0.062297063 | 11/1/2013 19:00 | 0 |
| 11/15/2013 14:15 | 0.059465378 | 11/1/2013 19:10 | 0 |
| 11/15/2013 14:30 | 0.056633693 | 11/1/2013 19:20 | 0 |
| 11/15/2013 14:45 | 0.053802009 | 11/1/2013 19:30 | 0 |
| 11/15/2013 15:00 | 0.053802009 | 11/1/2013 19:40 | 0 |
| 11/15/2013 15:15 | 0.050970324 | 11/1/2013 19:50 | 0 |
| 11/15/2013 15:30 | 0.050970324 | 11/1/2013 20:00 | 0 |
| 11/15/2013 15:45 | 0.050970324 | 11/1/2013 20:10 | 0 |
| 11/15/2013 16:00 | 0.050970324 | 11/1/2013 20:20 | 0 |
| 11/15/2013 16:15 | 0.053802009 | 11/1/2013 20:30 | 0 |
| 11/15/2013 16:30 | 0.050970324 | 11/1/2013 20:40 | 0 |
| 11/15/2013 16:45 | 0.053802009 | 11/1/2013 20:50 | 0 |
| 11/15/2013 17:00 | 0.056633693 | 11/1/2013 21:00 | 0 |
| 11/15/2013 17:15 | 0.062297063 | 11/1/2013 21:10 | 0 |
| 11/15/2013 17:30 | 0.067960432 | 11/1/2013 21:20 | 0 |
| 11/15/2013 17:45 | 0.067960432 | 11/1/2013 21:30 | 0 |
| 11/15/2013 18:00 | 0.067960432 | 11/1/2013 21:40 | 0 |
| 11/15/2013 18:15 | 0.067960432 | 11/1/2013 21:50 | 0 |
| 11/15/2013 18:30 | 0.067960432 | 11/1/2013 22:00 | 0 |
| 11/15/2013 18:45 | 0.062297063 | 11/1/2013 22:10 | 0 |
| 11/15/2013 19:00 | 0.065128747 | 11/1/2013 22:20 | 0 |
| 11/15/2013 19:15 | 0.062297063 | 11/1/2013 22:30 | 0 |
| 11/15/2013 19:30 | 0.062297063 | 11/1/2013 22:40 | 0 |
| 11/15/2013 19:45 | 0.062297063 | 11/1/2013 22:50 | 0 |
| 11/15/2013 20:00 | 0.062297063 | 11/1/2013 23:00 | 0 |
| 11/15/2013 20:15 | 0.062297063 | 11/1/2013 23:10 | 0 |
| 11/15/2013 20:30 | 0.062297063 | 11/1/2013 23:20 | 0 |
| 11/15/2013 20:45 | 0.062297063 | 11/1/2013 23:30 | 0 |
| 11/15/2013 21:00 | 0.062297063 | 11/1/2013 23:40 | 0 |
| 11/15/2013 21:15 | 0.062297063 | 11/1/2013 23:50 | 0 |
| 11/15/2013 21:30 | 0.062297063 | 11/2/2013 0:00  | 0 |
| 11/15/2013 21:45 | 0.062297063 | 11/2/2013 0:10  | 0 |
| 11/15/2013 22:00 | 0.062297063 | 11/2/2013 0:20  | 0 |
| 11/15/2013 22:15 | 0.062297063 | 11/2/2013 0:30  | 0 |
| 11/15/2013 22:30 | 0.062297063 | 11/2/2013 0:40  | 0 |
| 11/15/2013 22:45 | 0.062297063 | 11/2/2013 0:50  | 0 |
| 11/15/2013 23:00 | 0.062297063 | 11/2/2013 1:00  | 0 |
| 11/15/2013 23:15 | 0.062297063 | 11/2/2013 1:10  | 0 |
| 11/15/2013 23:30 | 0.062297063 | 11/2/2013 1:20  | 0 |
| 11/15/2013 23:45 | 0.062297063 | 11/2/2013 1:30  | 0 |
| 11/16/2013 0:00  | 0.062297063 | 11/2/2013 1:40  | 0 |
| 11/16/2013 0:15  | 0.062297063 | 11/2/2013 1:50  | 0 |

|                  |             |                |   |
|------------------|-------------|----------------|---|
| 11/16/2013 0:30  | 0.062297063 | 11/2/2013 2:00 | 0 |
| 11/16/2013 0:45  | 0.062297063 | 11/2/2013 2:10 | 0 |
| 11/16/2013 1:00  | 0.062297063 | 11/2/2013 2:20 | 0 |
| 11/16/2013 1:15  | 0.059465378 | 11/2/2013 2:30 | 0 |
| 11/16/2013 1:30  | 0.062297063 | 11/2/2013 2:40 | 0 |
| 11/16/2013 1:45  | 0.059465378 | 11/2/2013 2:50 | 0 |
| 11/16/2013 2:00  | 0.059465378 | 11/2/2013 3:00 | 0 |
| 11/16/2013 2:15  | 0.059465378 | 11/2/2013 3:10 | 0 |
| 11/16/2013 2:30  | 0.062297063 | 11/2/2013 3:20 | 0 |
| 11/16/2013 2:45  | 0.059465378 | 11/2/2013 3:30 | 0 |
| 11/16/2013 3:00  | 0.059465378 | 11/2/2013 3:40 | 0 |
| 11/16/2013 3:15  | 0.056633693 | 11/2/2013 3:50 | 0 |
| 11/16/2013 3:30  | 0.053802009 | 11/2/2013 4:00 | 0 |
| 11/16/2013 3:45  | 0.050970324 | 11/2/2013 4:10 | 0 |
| 11/16/2013 4:00  | 0.050970324 | 11/2/2013 4:20 | 0 |
| 11/16/2013 4:15  | 0.050970324 | 11/2/2013 4:30 | 0 |
| 11/16/2013 4:30  | 0.048138639 | 11/2/2013 4:40 | 0 |
| 11/16/2013 4:45  | 0.048138639 | 11/2/2013 4:50 | 0 |
| 11/16/2013 5:00  | 0.048138639 | 11/2/2013 5:00 | 0 |
| 11/16/2013 5:15  | 0.048138639 | 11/2/2013 5:10 | 0 |
| 11/16/2013 5:30  | 0.048138639 | 11/2/2013 5:20 | 0 |
| 11/16/2013 5:45  | 0.048138639 | 11/2/2013 5:30 | 0 |
| 11/16/2013 6:00  | 0.048138639 | 11/2/2013 5:40 | 0 |
| 11/16/2013 6:15  | 0.048138639 | 11/2/2013 5:50 | 0 |
| 11/16/2013 6:30  | 0.048138639 | 11/2/2013 6:00 | 0 |
| 11/16/2013 6:45  | 0.048138639 | 11/2/2013 6:10 | 0 |
| 11/16/2013 7:00  | 0.048138639 | 11/2/2013 6:20 | 0 |
| 11/16/2013 7:15  | 0.048138639 | 11/2/2013 6:30 | 0 |
| 11/16/2013 7:30  | 0.048138639 | 11/2/2013 6:40 | 0 |
| 11/16/2013 7:45  | 0.048138639 | 11/2/2013 6:50 | 0 |
| 11/16/2013 8:00  | 0.048138639 | 11/2/2013 7:00 | 0 |
| 11/16/2013 8:15  | 0.048138639 | 11/2/2013 7:10 | 0 |
| 11/16/2013 8:30  | 0.048138639 | 11/2/2013 7:20 | 0 |
| 11/16/2013 8:45  | 0.045306955 | 11/2/2013 7:30 | 0 |
| 11/16/2013 9:00  | 0.045306955 | 11/2/2013 7:40 | 0 |
| 11/16/2013 9:15  | 0.048138639 | 11/2/2013 7:50 | 0 |
| 11/16/2013 9:30  | 0.045306955 | 11/2/2013 8:00 | 0 |
| 11/16/2013 9:45  | 0.045306955 | 11/2/2013 8:10 | 0 |
| 11/16/2013 10:00 | 0.045306955 | 11/2/2013 8:20 | 0 |
| 11/16/2013 10:15 | 0.048138639 | 11/2/2013 8:30 | 0 |
| 11/16/2013 10:30 | 0.048138639 | 11/2/2013 8:40 | 0 |
| 11/16/2013 10:45 | 0.048138639 | 11/2/2013 8:50 | 0 |
| 11/16/2013 11:00 | 0.045306955 | 11/2/2013 9:00 | 0 |
| 11/16/2013 11:15 | 0.048138639 | 11/2/2013 9:10 | 0 |
| 11/16/2013 11:30 | 0.045306955 | 11/2/2013 9:20 | 0 |
| 11/16/2013 11:45 | 0.045306955 | 11/2/2013 9:30 | 0 |
| 11/16/2013 12:00 | 0.048138639 | 11/2/2013 9:40 | 0 |

|                  |             |                 |   |
|------------------|-------------|-----------------|---|
| 11/16/2013 12:15 | 0.048138639 | 11/2/2013 9:50  | 0 |
| 11/16/2013 12:30 | 0.048138639 | 11/2/2013 10:00 | 0 |
| 11/16/2013 12:45 | 0.048138639 | 11/2/2013 10:10 | 0 |
| 11/16/2013 13:00 | 0.048138639 | 11/2/2013 10:20 | 0 |
| 11/16/2013 13:15 | 0.048138639 | 11/2/2013 10:30 | 0 |
| 11/16/2013 13:30 | 0.048138639 | 11/2/2013 10:40 | 0 |
| 11/16/2013 13:45 | 0.048138639 | 11/2/2013 10:50 | 0 |
| 11/16/2013 14:00 | 0.048138639 | 11/2/2013 11:00 | 0 |
| 11/16/2013 14:15 | 0.048138639 | 11/2/2013 11:10 | 0 |
| 11/16/2013 14:30 | 0.048138639 | 11/2/2013 11:20 | 0 |
| 11/16/2013 14:45 | 0.048138639 | 11/2/2013 11:30 | 0 |
| 11/16/2013 15:00 | 0.048138639 | 11/2/2013 11:40 | 0 |
| 11/16/2013 15:15 | 0.048138639 | 11/2/2013 11:50 | 0 |
| 11/16/2013 15:30 | 0.048138639 | 11/2/2013 12:00 | 0 |
| 11/16/2013 15:45 | 0.048138639 | 11/2/2013 12:10 | 0 |
| 11/16/2013 16:00 | 0.050970324 | 11/2/2013 12:20 | 0 |
| 11/16/2013 16:15 | 0.048138639 | 11/2/2013 12:30 | 0 |
| 11/16/2013 16:30 | 0.048138639 | 11/2/2013 12:40 | 0 |
| 11/16/2013 16:45 | 0.048138639 | 11/2/2013 12:50 | 0 |
| 11/16/2013 17:00 | 0.048138639 | 11/2/2013 13:00 | 0 |
| 11/16/2013 17:15 | 0.048138639 | 11/2/2013 13:10 | 0 |
| 11/16/2013 17:30 | 0.050970324 | 11/2/2013 13:20 | 0 |
| 11/16/2013 17:45 | 0.050970324 | 11/2/2013 13:30 | 0 |
| 11/16/2013 18:00 | 0.050970324 | 11/2/2013 13:40 | 0 |
| 11/16/2013 18:15 | 0.050970324 | 11/2/2013 13:50 | 0 |
| 11/16/2013 18:30 | 0.050970324 | 11/2/2013 14:00 | 0 |
| 11/16/2013 18:45 | 0.050970324 | 11/2/2013 14:10 | 0 |
| 11/16/2013 19:00 | 0.050970324 | 11/2/2013 14:20 | 0 |
| 11/16/2013 19:15 | 0.050970324 | 11/2/2013 14:30 | 0 |
| 11/16/2013 19:30 | 0.050970324 | 11/2/2013 14:40 | 0 |
| 11/16/2013 19:45 | 0.048138639 | 11/2/2013 14:50 | 0 |
| 11/16/2013 20:00 | 0.048138639 | 11/2/2013 15:00 | 0 |
| 11/16/2013 20:15 | 0.048138639 | 11/2/2013 15:10 | 0 |
| 11/16/2013 20:30 | 0.048138639 | 11/2/2013 15:20 | 0 |
| 11/16/2013 20:45 | 0.048138639 | 11/2/2013 15:30 | 0 |
| 11/16/2013 21:00 | 0.048138639 | 11/2/2013 15:40 | 0 |
| 11/16/2013 21:15 | 0.048138639 | 11/2/2013 15:50 | 0 |
| 11/16/2013 21:30 | 0.048138639 | 11/2/2013 16:00 | 0 |
| 11/16/2013 21:45 | 0.048138639 | 11/2/2013 16:10 | 0 |
| 11/16/2013 22:00 | 0.048138639 | 11/2/2013 16:20 | 0 |
| 11/16/2013 22:15 | 0.048138639 | 11/2/2013 16:30 | 0 |
| 11/16/2013 22:30 | 0.048138639 | 11/2/2013 16:40 | 0 |
| 11/16/2013 22:45 | 0.048138639 | 11/2/2013 16:50 | 0 |
| 11/16/2013 23:00 | 0.045306955 | 11/2/2013 17:00 | 0 |
| 11/16/2013 23:15 | 0.045306955 | 11/2/2013 17:10 | 0 |
| 11/16/2013 23:30 | 0.045306955 | 11/2/2013 17:20 | 0 |
| 11/16/2013 23:45 | 0.045306955 | 11/2/2013 17:30 | 0 |



|                  |             |                 |   |
|------------------|-------------|-----------------|---|
| 11/17/2013 0:00  | 0.045306955 | 11/2/2013 17:40 | 0 |
| 11/17/2013 0:15  | 0.045306955 | 11/2/2013 17:50 | 0 |
| 11/17/2013 0:30  | 0.045306955 | 11/2/2013 18:00 | 0 |
| 11/17/2013 0:45  | 0.045306955 | 11/2/2013 18:10 | 0 |
| 11/17/2013 1:00  | 0.045306955 | 11/2/2013 18:20 | 0 |
| 11/17/2013 1:15  | 0.045306955 | 11/2/2013 18:30 | 0 |
| 11/17/2013 1:30  | 0.045306955 | 11/2/2013 18:40 | 0 |
| 11/17/2013 1:45  | 0.045306955 | 11/2/2013 18:50 | 0 |
| 11/17/2013 2:00  | 0.045306955 | 11/2/2013 19:00 | 0 |
| 11/17/2013 2:15  | 0.045306955 | 11/2/2013 19:10 | 0 |
| 11/17/2013 2:30  | 0.045306955 | 11/2/2013 19:20 | 0 |
| 11/17/2013 2:45  | 0.045306955 | 11/2/2013 19:30 | 0 |
| 11/17/2013 3:00  | 0.045306955 | 11/2/2013 19:40 | 0 |
| 11/17/2013 3:15  | 0.045306955 | 11/2/2013 19:50 | 0 |
| 11/17/2013 3:30  | 0.048138639 | 11/2/2013 20:00 | 0 |
| 11/17/2013 3:45  | 0.045306955 | 11/2/2013 20:10 | 0 |
| 11/17/2013 4:00  | 0.045306955 | 11/2/2013 20:20 | 0 |
| 11/17/2013 4:15  | 0.048138639 | 11/2/2013 20:30 | 0 |
| 11/17/2013 4:30  | 0.045306955 | 11/2/2013 20:40 | 0 |
| 11/17/2013 4:45  | 0.045306955 | 11/2/2013 20:50 | 0 |
| 11/17/2013 5:00  | 0.045306955 | 11/2/2013 21:00 | 0 |
| 11/17/2013 5:15  | 0.048138639 | 11/2/2013 21:10 | 0 |
| 11/17/2013 5:30  | 0.048138639 | 11/2/2013 21:20 | 0 |
| 11/17/2013 5:45  | 0.048138639 | 11/2/2013 21:30 | 0 |
| 11/17/2013 6:00  | 0.048138639 | 11/2/2013 21:40 | 0 |
| 11/17/2013 6:15  | 0.045306955 | 11/2/2013 21:50 | 0 |
| 11/17/2013 6:30  | 0.048138639 | 11/2/2013 22:00 | 0 |
| 11/17/2013 6:45  | 0.048138639 | 11/2/2013 22:10 | 0 |
| 11/17/2013 7:00  | 0.048138639 | 11/2/2013 22:20 | 0 |
| 11/17/2013 7:15  | 0.048138639 | 11/2/2013 22:30 | 0 |
| 11/17/2013 7:30  | 0.050970324 | 11/2/2013 22:40 | 0 |
| 11/17/2013 7:45  | 0.048138639 | 11/2/2013 22:50 | 0 |
| 11/17/2013 8:00  | 0.048138639 | 11/2/2013 23:00 | 0 |
| 11/17/2013 8:15  | 0.048138639 | 11/2/2013 23:10 | 0 |
| 11/17/2013 8:30  | 0.048138639 | 11/2/2013 23:20 | 0 |
| 11/17/2013 8:45  | 0.048138639 | 11/2/2013 23:30 | 0 |
| 11/17/2013 9:00  | 0.048138639 | 11/2/2013 23:40 | 0 |
| 11/17/2013 9:15  | 0.048138639 | 11/2/2013 23:50 | 0 |
| 11/17/2013 9:30  | 0.048138639 | 11/3/2013 0:00  | 0 |
| 11/17/2013 9:45  | 0.050970324 | 11/3/2013 0:10  | 0 |
| 11/17/2013 10:00 | 0.053802009 | 11/3/2013 0:20  | 0 |
| 11/17/2013 10:15 | 0.059465378 | 11/3/2013 0:30  | 0 |
| 11/17/2013 10:30 | 0.067960432 | 11/3/2013 0:40  | 0 |
| 11/17/2013 10:45 | 0.070792117 | 11/3/2013 0:50  | 0 |
| 11/17/2013 11:00 | 0.073623801 | 11/3/2013 1:00  | 0 |
| 11/17/2013 11:15 | 0.073623801 | 11/3/2013 1:00  | 0 |
| 11/17/2013 11:30 | 0.070792117 | 11/3/2013 1:10  | 0 |

|                  |             |                |   |
|------------------|-------------|----------------|---|
| 11/17/2013 11:45 | 0.067960432 | 11/3/2013 1:10 | 0 |
| 11/17/2013 12:00 | 0.067960432 | 11/3/2013 1:20 | 0 |
| 11/17/2013 12:15 | 0.065128747 | 11/3/2013 1:20 | 0 |
| 11/17/2013 12:30 | 0.067960432 | 11/3/2013 1:30 | 0 |
| 11/17/2013 12:45 | 0.073623801 | 11/3/2013 1:30 | 0 |
| 11/17/2013 13:00 | 0.076455486 | 11/3/2013 1:40 | 0 |
| 11/17/2013 13:15 | 0.082118855 | 11/3/2013 1:40 | 0 |
| 11/17/2013 13:30 | 0.08495054  | 11/3/2013 1:50 | 0 |
| 11/17/2013 13:45 | 0.087782224 | 11/3/2013 1:50 | 0 |
| 11/17/2013 14:00 | 0.087782224 | 11/3/2013 2:00 | 0 |
| 11/17/2013 14:15 | 0.08495054  | 11/3/2013 2:10 | 0 |
| 11/17/2013 14:30 | 0.082118855 | 11/3/2013 2:20 | 0 |
| 11/17/2013 14:45 | 0.07928717  | 11/3/2013 2:30 | 0 |
| 11/17/2013 15:00 | 0.07928717  | 11/3/2013 2:40 | 0 |
| 11/17/2013 15:15 | 0.076455486 | 11/3/2013 2:50 | 0 |
| 11/17/2013 15:30 | 0.073623801 | 11/3/2013 3:00 | 0 |
| 11/17/2013 15:45 | 0.076455486 | 11/3/2013 3:10 | 0 |
| 11/17/2013 16:00 | 0.076455486 | 11/3/2013 3:20 | 0 |
| 11/17/2013 16:15 | 0.07928717  | 11/3/2013 3:30 | 0 |
| 11/17/2013 16:30 | 0.07928717  | 11/3/2013 3:40 | 0 |
| 11/17/2013 16:45 | 0.082118855 | 11/3/2013 3:50 | 0 |
| 11/17/2013 17:00 | 0.08495054  | 11/3/2013 4:00 | 0 |
| 11/17/2013 17:15 | 0.08495054  | 11/3/2013 4:10 | 0 |
| 11/17/2013 17:30 | 0.082118855 | 11/3/2013 4:20 | 0 |
| 11/17/2013 17:45 | 0.08495054  | 11/3/2013 4:30 | 0 |
| 11/17/2013 18:00 | 0.08495054  | 11/3/2013 4:40 | 0 |
| 11/17/2013 18:15 | 0.08495054  | 11/3/2013 4:50 | 0 |
| 11/17/2013 18:30 | 0.08495054  | 11/3/2013 5:00 | 0 |
| 11/17/2013 18:45 | 0.082118855 | 11/3/2013 5:10 | 0 |
| 11/17/2013 19:00 | 0.08495054  | 11/3/2013 5:20 | 0 |
| 11/17/2013 19:15 | 0.082118855 | 11/3/2013 5:30 | 0 |
| 11/17/2013 19:30 | 0.082118855 | 11/3/2013 5:40 | 0 |
| 11/17/2013 19:45 | 0.082118855 | 11/3/2013 5:50 | 0 |
| 11/17/2013 20:00 | 0.07928717  | 11/3/2013 6:00 | 0 |
| 11/17/2013 20:15 | 0.07928717  | 11/3/2013 6:10 | 0 |
| 11/17/2013 20:30 | 0.076455486 | 11/3/2013 6:20 | 0 |
| 11/17/2013 20:45 | 0.07928717  | 11/3/2013 6:30 | 0 |
| 11/17/2013 21:00 | 0.076455486 | 11/3/2013 6:40 | 0 |
| 11/17/2013 21:15 | 0.07928717  | 11/3/2013 6:50 | 0 |
| 11/17/2013 21:30 | 0.076455486 | 11/3/2013 7:00 | 0 |
| 11/17/2013 21:45 | 0.076455486 | 11/3/2013 7:10 | 0 |
| 11/17/2013 22:00 | 0.076455486 | 11/3/2013 7:20 | 0 |
| 11/17/2013 22:15 | 0.076455486 | 11/3/2013 7:30 | 0 |
| 11/17/2013 22:30 | 0.076455486 | 11/3/2013 7:40 | 0 |
| 11/17/2013 22:45 | 0.073623801 | 11/3/2013 7:50 | 0 |
| 11/17/2013 23:00 | 0.073623801 | 11/3/2013 8:00 | 0 |
| 11/17/2013 23:15 | 0.073623801 | 11/3/2013 8:10 | 0 |

|                  |             |                 |   |
|------------------|-------------|-----------------|---|
| 11/17/2013 23:30 | 0.073623801 | 11/3/2013 8:20  | 0 |
| 11/17/2013 23:45 | 0.073623801 | 11/3/2013 8:30  | 0 |
| 11/18/2013 0:00  | 0.073623801 | 11/3/2013 8:40  | 0 |
| 11/18/2013 0:15  | 0.073623801 | 11/3/2013 8:50  | 0 |
| 11/18/2013 0:30  | 0.073623801 | 11/3/2013 9:00  | 0 |
| 11/18/2013 0:45  | 0.073623801 | 11/3/2013 9:10  | 0 |
| 11/18/2013 1:00  | 0.073623801 | 11/3/2013 9:20  | 0 |
| 11/18/2013 1:15  | 0.073623801 | 11/3/2013 9:30  | 0 |
| 11/18/2013 1:30  | 0.073623801 | 11/3/2013 9:40  | 0 |
| 11/18/2013 1:45  | 0.073623801 | 11/3/2013 9:50  | 0 |
| 11/18/2013 2:00  | 0.073623801 | 11/3/2013 10:00 | 0 |
| 11/18/2013 2:15  | 0.073623801 | 11/3/2013 10:10 | 0 |
| 11/18/2013 2:30  | 0.073623801 | 11/3/2013 10:20 | 0 |
| 11/18/2013 2:45  | 0.073623801 | 11/3/2013 10:30 | 0 |
| 11/18/2013 3:00  | 0.073623801 | 11/3/2013 10:40 | 0 |
| 11/18/2013 3:15  | 0.067960432 | 11/3/2013 10:50 | 0 |
| 11/18/2013 3:30  | 0.067960432 | 11/3/2013 11:00 | 0 |
| 11/18/2013 3:45  | 0.067960432 | 11/3/2013 11:10 | 0 |
| 11/18/2013 4:00  | 0.070792117 | 11/3/2013 11:20 | 0 |
| 11/18/2013 4:15  | 0.067960432 | 11/3/2013 11:30 | 0 |
| 11/18/2013 4:30  | 0.067960432 | 11/3/2013 11:40 | 0 |
| 11/18/2013 4:45  | 0.067960432 | 11/3/2013 11:50 | 0 |
| 11/18/2013 5:00  | 0.067960432 | 11/3/2013 12:00 | 0 |
| 11/18/2013 5:15  | 0.067960432 | 11/3/2013 12:10 | 0 |
| 11/18/2013 5:30  | 0.067960432 | 11/3/2013 12:20 | 0 |
| 11/18/2013 5:45  | 0.065128747 | 11/3/2013 12:30 | 0 |
| 11/18/2013 6:00  | 0.065128747 | 11/3/2013 12:40 | 0 |
| 11/18/2013 6:15  | 0.065128747 | 11/3/2013 12:50 | 0 |
| 11/18/2013 6:30  | 0.065128747 | 11/3/2013 13:00 | 0 |
| 11/18/2013 6:45  | 0.065128747 | 11/3/2013 13:10 | 0 |
| 11/18/2013 7:00  | 0.065128747 | 11/3/2013 13:20 | 0 |
| 11/18/2013 7:15  | 0.062297063 | 11/3/2013 13:30 | 0 |
| 11/18/2013 7:30  | 0.062297063 | 11/3/2013 13:40 | 0 |
| 11/18/2013 7:45  | 0.062297063 | 11/3/2013 13:50 | 0 |
| 11/18/2013 8:00  | 0.062297063 | 11/3/2013 14:00 | 0 |
| 11/18/2013 8:15  | 0.062297063 | 11/3/2013 14:10 | 0 |
| 11/18/2013 8:30  | 0.062297063 | 11/3/2013 14:20 | 0 |
| 11/18/2013 8:45  | 0.062297063 | 11/3/2013 14:30 | 0 |
| 11/18/2013 9:00  | 0.062297063 | 11/3/2013 14:40 | 0 |
| 11/18/2013 9:15  | 0.062297063 | 11/3/2013 14:50 | 0 |
| 11/18/2013 9:30  | 0.062297063 | 11/3/2013 15:00 | 0 |
| 11/18/2013 9:45  | 0.062297063 | 11/3/2013 15:10 | 0 |
| 11/18/2013 10:00 | 0.067960432 | 11/3/2013 15:20 | 0 |
| 11/18/2013 10:15 | 0.070792117 | 11/3/2013 15:30 | 0 |
| 11/18/2013 10:30 | 0.073623801 | 11/3/2013 15:40 | 0 |
| 11/18/2013 10:45 | 0.073623801 | 11/3/2013 15:50 | 0 |
| 11/18/2013 11:00 | 0.073623801 | 11/3/2013 16:00 | 0 |

|                  |             |                 |   |
|------------------|-------------|-----------------|---|
| 11/18/2013 11:15 | 0.070792117 | 11/3/2013 16:10 | 0 |
| 11/18/2013 11:30 | 0.073623801 | 11/3/2013 16:20 | 0 |
| 11/18/2013 11:45 | 0.070792117 | 11/3/2013 16:30 | 0 |
| 11/18/2013 12:00 | 0.070792117 | 11/3/2013 16:40 | 0 |
| 11/18/2013 12:15 | 0.070792117 | 11/3/2013 16:50 | 0 |
| 11/18/2013 12:30 | 0.070792117 | 11/3/2013 17:00 | 0 |
| 11/18/2013 12:45 | 0.070792117 | 11/3/2013 17:10 | 0 |
| 11/18/2013 13:00 | 0.070792117 | 11/3/2013 17:20 | 0 |
| 11/18/2013 13:15 | 0.070792117 | 11/3/2013 17:30 | 0 |
| 11/18/2013 13:30 | 0.070792117 | 11/3/2013 17:40 | 0 |
| 11/18/2013 13:45 | 0.070792117 | 11/3/2013 17:50 | 0 |
| 11/18/2013 14:00 | 0.067960432 | 11/3/2013 18:00 | 0 |
| 11/18/2013 14:15 | 0.067960432 | 11/3/2013 18:10 | 0 |
| 11/18/2013 14:30 | 0.067960432 | 11/3/2013 18:20 | 0 |
| 11/18/2013 14:45 | 0.067960432 | 11/3/2013 18:30 | 0 |
| 11/18/2013 15:00 | 0.067960432 | 11/3/2013 18:40 | 0 |
| 11/18/2013 15:15 | 0.067960432 | 11/3/2013 18:50 | 0 |
| 11/18/2013 15:30 | 0.065128747 | 11/3/2013 19:00 | 0 |
| 11/18/2013 15:45 | 0.065128747 | 11/3/2013 19:10 | 0 |
| 11/18/2013 16:00 | 0.065128747 | 11/3/2013 19:20 | 0 |
| 11/18/2013 16:15 | 0.065128747 | 11/3/2013 19:30 | 0 |
| 11/18/2013 16:30 | 0.065128747 | 11/3/2013 19:40 | 0 |
| 11/18/2013 16:45 | 0.065128747 | 11/3/2013 19:50 | 0 |
| 11/18/2013 17:00 | 0.065128747 | 11/3/2013 20:00 | 0 |
| 11/18/2013 17:15 | 0.062297063 | 11/3/2013 20:10 | 0 |
| 11/18/2013 17:30 | 0.062297063 | 11/3/2013 20:20 | 0 |
| 11/18/2013 17:45 | 0.062297063 | 11/3/2013 20:30 | 0 |
| 11/18/2013 18:00 | 0.062297063 | 11/3/2013 20:40 | 0 |
| 11/18/2013 18:15 | 0.062297063 | 11/3/2013 20:50 | 0 |
| 11/18/2013 18:30 | 0.062297063 | 11/3/2013 21:00 | 0 |
| 11/18/2013 18:45 | 0.062297063 | 11/3/2013 21:10 | 0 |
| 11/18/2013 19:00 | 0.062297063 | 11/3/2013 21:20 | 0 |
| 11/18/2013 19:15 | 0.062297063 | 11/3/2013 21:30 | 0 |
| 11/18/2013 19:30 | 0.062297063 | 11/3/2013 21:40 | 0 |
| 11/18/2013 19:45 | 0.062297063 | 11/3/2013 21:50 | 0 |
| 11/18/2013 20:00 | 0.062297063 | 11/3/2013 22:00 | 0 |
| 11/18/2013 20:15 | 0.062297063 | 11/3/2013 22:10 | 0 |
| 11/18/2013 20:30 | 0.059465378 | 11/3/2013 22:20 | 0 |
| 11/18/2013 20:45 | 0.056633693 | 11/3/2013 22:30 | 0 |
| 11/18/2013 21:00 | 0.056633693 | 11/3/2013 22:40 | 0 |
| 11/18/2013 21:15 | 0.056633693 | 11/3/2013 22:50 | 0 |
| 11/18/2013 21:30 | 0.053802009 | 11/3/2013 23:00 | 0 |
| 11/18/2013 21:45 | 0.053802009 | 11/3/2013 23:10 | 0 |
| 11/18/2013 22:00 | 0.053802009 | 11/3/2013 23:20 | 0 |
| 11/18/2013 22:15 | 0.053802009 | 11/3/2013 23:30 | 0 |
| 11/18/2013 22:30 | 0.050970324 | 11/3/2013 23:40 | 0 |
| 11/18/2013 22:45 | 0.053802009 | 11/3/2013 23:50 | 0 |

|                  |             |                |        |
|------------------|-------------|----------------|--------|
| 11/18/2013 23:00 | 0.053802009 | 11/4/2013 0:00 | 0      |
| 11/18/2013 23:15 | 0.053802009 | 11/4/2013 0:10 | 0      |
| 11/18/2013 23:30 | 0.050970324 | 11/4/2013 0:20 | 0      |
| 11/18/2013 23:45 | 0.050970324 | 11/4/2013 0:30 | 0      |
| 11/19/2013 0:00  | 0.050970324 | 11/4/2013 0:40 | 0      |
| 11/19/2013 0:15  | 0.050970324 | 11/4/2013 0:50 | 0      |
| 11/19/2013 0:30  | 0.050970324 | 11/4/2013 1:00 | 0      |
| 11/19/2013 0:45  | 0.050970324 | 11/4/2013 1:10 | 0      |
| 11/19/2013 1:00  | 0.050970324 | 11/4/2013 1:20 | 0      |
| 11/19/2013 1:15  | 0.050970324 | 11/4/2013 1:30 | 0      |
| 11/19/2013 1:30  | 0.050970324 | 11/4/2013 1:40 | 0      |
| 11/19/2013 1:45  | 0.050970324 | 11/4/2013 1:50 | 0      |
| 11/19/2013 2:00  | 0.050970324 | 11/4/2013 2:00 | 0      |
| 11/19/2013 2:15  | 0.050970324 | 11/4/2013 2:10 | 0      |
| 11/19/2013 2:30  | 0.050970324 | 11/4/2013 2:20 | 0      |
| 11/19/2013 2:45  | 0.050970324 | 11/4/2013 2:30 | 0      |
| 11/19/2013 3:00  | 0.050970324 | 11/4/2013 2:40 | 0      |
| 11/19/2013 3:15  | 0.050970324 | 11/4/2013 2:50 | 0      |
| 11/19/2013 3:30  | 0.050970324 | 11/4/2013 3:00 | 0      |
| 11/19/2013 3:45  | 0.050970324 | 11/4/2013 3:10 | 0      |
| 11/19/2013 4:00  | 0.050970324 | 11/4/2013 3:20 | 0      |
| 11/19/2013 4:15  | 0.050970324 | 11/4/2013 3:30 | 0      |
| 11/19/2013 4:30  | 0.050970324 | 11/4/2013 3:40 | 0      |
| 11/19/2013 4:45  | 0.050970324 | 11/4/2013 3:50 | 0      |
| 11/19/2013 5:00  | 0.050970324 | 11/4/2013 4:00 | 0      |
| 11/19/2013 5:15  | 0.050970324 | 11/4/2013 4:10 | 0      |
| 11/19/2013 5:30  | 0.048138639 | 11/4/2013 4:20 | 0      |
| 11/19/2013 5:45  | 0.050970324 | 11/4/2013 4:30 | 0      |
| 11/19/2013 6:00  | 0.048138639 | 11/4/2013 4:40 | 0      |
| 11/19/2013 6:15  | 0.048138639 | 11/4/2013 4:50 | 0.0254 |
| 11/19/2013 6:30  | 0.048138639 | 11/4/2013 5:00 | 0.0254 |
| 11/19/2013 6:45  | 0.050970324 | 11/4/2013 5:10 | 0.0254 |
| 11/19/2013 7:00  | 0.050970324 | 11/4/2013 5:20 | 0.0508 |
| 11/19/2013 7:15  | 0.050970324 | 11/4/2013 5:30 | 0.0762 |
| 11/19/2013 7:30  | 0.045306955 | 11/4/2013 5:40 | 0.1016 |
| 11/19/2013 7:45  | 0.048138639 | 11/4/2013 5:50 | 0.127  |
| 11/19/2013 8:00  | 0.045306955 | 11/4/2013 6:00 | 0.1778 |
| 11/19/2013 8:15  | 0.045306955 | 11/4/2013 6:10 | 0.2032 |
| 11/19/2013 8:30  | 0.045306955 | 11/4/2013 6:20 | 0.2032 |
| 11/19/2013 8:45  | 0.048138639 | 11/4/2013 6:30 | 0.2032 |
| 11/19/2013 9:00  | 0.045306955 | 11/4/2013 6:40 | 0.2032 |
| 11/19/2013 9:15  | 0.048138639 | 11/4/2013 6:50 | 0.2032 |
| 11/19/2013 9:30  | 0.050970324 | 11/4/2013 7:00 | 0.2032 |
| 11/19/2013 9:45  | 0.050970324 | 11/4/2013 7:10 | 0.2032 |
| 11/19/2013 10:00 | 0.050970324 | 11/4/2013 7:20 | 0.2032 |
| 11/19/2013 10:15 | 0.050970324 | 11/4/2013 7:30 | 0.2032 |
| 11/19/2013 10:30 | 0.050970324 | 11/4/2013 7:40 | 0.2032 |

|                  |             |                 |        |
|------------------|-------------|-----------------|--------|
| 11/19/2013 10:45 | 0.050970324 | 11/4/2013 7:50  | 0.2032 |
| 11/19/2013 11:00 | 0.050970324 | 11/4/2013 8:00  | 0.2032 |
| 11/19/2013 11:15 | 0.050970324 | 11/4/2013 8:10  | 0.2032 |
| 11/19/2013 11:30 | 0.050970324 | 11/4/2013 8:20  | 0.2032 |
| 11/19/2013 11:45 | 0.050970324 | 11/4/2013 8:30  | 0.2032 |
| 11/19/2013 12:00 | 0.050970324 | 11/4/2013 8:40  | 0.2032 |
| 11/19/2013 12:15 | 0.050970324 | 11/4/2013 8:50  | 0.2032 |
| 11/19/2013 12:30 | 0.050970324 | 11/4/2013 9:00  | 0.2032 |
| 11/19/2013 12:45 | 0.050970324 | 11/4/2013 9:10  | 0.2032 |
| 11/19/2013 13:00 | 0.048138639 | 11/4/2013 9:20  | 0.2032 |
| 11/19/2013 13:15 | 0.048138639 | 11/4/2013 9:30  | 0.2032 |
| 11/19/2013 13:30 | 0.050970324 | 11/4/2013 9:40  | 0.2032 |
| 11/19/2013 13:45 | 0.048138639 | 11/4/2013 9:50  | 0.2032 |
| 11/19/2013 14:00 | 0.045306955 | 11/4/2013 10:00 | 0.2032 |
| 11/19/2013 14:15 | 0.045306955 | 11/4/2013 10:10 | 0.2032 |
| 11/19/2013 14:30 | 0.045306955 | 11/4/2013 10:20 | 0.2032 |
| 11/19/2013 14:45 | 0.045306955 | 11/4/2013 10:30 | 0.2032 |
| 11/19/2013 15:00 | 0.045306955 | 11/4/2013 10:40 | 0.2032 |
| 11/19/2013 15:15 | 0.045306955 | 11/4/2013 10:50 | 0.2032 |
| 11/19/2013 15:30 | 0.045306955 | 11/4/2013 11:00 | 0.2032 |
| 11/19/2013 15:45 | 0.045306955 | 11/4/2013 11:10 | 0.2032 |
| 11/19/2013 16:00 | 0.045306955 | 11/4/2013 11:20 | 0.2032 |
| 11/19/2013 16:15 | 0.045306955 | 11/4/2013 11:30 | 0.2032 |
| 11/19/2013 16:30 | 0.045306955 | 11/4/2013 11:40 | 0.2032 |
| 11/19/2013 16:45 | 0.045306955 | 11/4/2013 11:50 | 0.2032 |
| 11/19/2013 17:00 | 0.045306955 | 11/4/2013 12:00 | 0.2032 |
| 11/19/2013 17:15 | 0.045306955 | 11/4/2013 12:10 | 0.2032 |
| 11/19/2013 17:30 | 0.04247527  | 11/4/2013 12:20 | 0.2032 |
| 11/19/2013 17:45 | 0.045306955 | 11/4/2013 12:30 | 0.2032 |
| 11/19/2013 18:00 | 0.045306955 | 11/4/2013 12:40 | 0.2032 |
| 11/19/2013 18:15 | 0.045306955 | 11/4/2013 12:50 | 0.2032 |
| 11/19/2013 18:30 | 0.04247527  | 11/4/2013 13:00 | 0.2032 |
| 11/19/2013 18:45 | 0.045306955 | 11/4/2013 13:10 | 0.2032 |
| 11/19/2013 19:00 | 0.04247527  | 11/4/2013 13:20 | 0.2032 |
| 11/19/2013 19:15 | 0.04247527  | 11/4/2013 13:30 | 0.2032 |
| 11/19/2013 19:30 | 0.04247527  | 11/4/2013 13:40 | 0.2032 |
| 11/19/2013 19:45 | 0.04247527  | 11/4/2013 13:50 | 0.2032 |
| 11/19/2013 20:00 | 0.04247527  | 11/4/2013 14:00 | 0.2032 |
| 11/19/2013 20:15 | 0.04247527  | 11/4/2013 14:10 | 0.2032 |
| 11/19/2013 20:30 | 0.04247527  | 11/4/2013 14:20 | 0.2032 |
| 11/19/2013 20:45 | 0.04247527  | 11/4/2013 14:30 | 0.2032 |
| 11/19/2013 21:00 | 0.04247527  | 11/4/2013 14:40 | 0.2032 |
| 11/19/2013 21:15 | 0.04247527  | 11/4/2013 14:50 | 0.2032 |
| 11/19/2013 21:30 | 0.04247527  | 11/4/2013 15:00 | 0.2032 |
| 11/19/2013 21:45 | 0.04247527  | 11/4/2013 15:10 | 0.2032 |
| 11/19/2013 22:00 | 0.04247527  | 11/4/2013 15:20 | 0.2032 |
| 11/19/2013 22:15 | 0.04247527  | 11/4/2013 15:30 | 0.2032 |

|                  |            |                 |        |
|------------------|------------|-----------------|--------|
| 11/19/2013 22:30 | 0.04247527 | 11/4/2013 15:40 | 0.2032 |
| 11/19/2013 22:45 | 0.04247527 | 11/4/2013 15:50 | 0.2032 |
| 11/19/2013 23:00 | 0.04247527 | 11/4/2013 16:00 | 0.2032 |
| 11/19/2013 23:15 | 0.04247527 | 11/4/2013 16:10 | 0.2032 |
| 11/19/2013 23:30 | 0.04247527 | 11/4/2013 16:20 | 0.2032 |
| 11/19/2013 23:45 | 0.04247527 | 11/4/2013 16:30 | 0.2032 |
| 11/20/2013 0:00  | 0.04247527 | 11/4/2013 16:40 | 0.2032 |
| 11/20/2013 0:15  | 0.04247527 | 11/4/2013 16:50 | 0.2032 |
| 11/20/2013 0:30  | 0.04247527 | 11/4/2013 17:00 | 0.2032 |
| 11/20/2013 0:45  | 0.04247527 | 11/4/2013 17:10 | 0.2032 |
| 11/20/2013 1:00  | 0.04247527 | 11/4/2013 17:20 | 0.2032 |
| 11/20/2013 1:15  | 0.04247527 | 11/4/2013 17:30 | 0.2032 |
| 11/20/2013 1:30  | 0.04247527 | 11/4/2013 17:40 | 0.2032 |
| 11/20/2013 1:45  | 0.04247527 | 11/4/2013 17:50 | 0.2032 |
| 11/20/2013 2:00  | 0.04247527 | 11/4/2013 18:00 | 0.2032 |
| 11/20/2013 2:15  | 0.04247527 | 11/4/2013 18:10 | 0.2032 |
| 11/20/2013 2:30  | 0.04247527 | 11/4/2013 18:20 | 0.2032 |
| 11/20/2013 2:45  | 0.04247527 | 11/4/2013 18:30 | 0.2032 |
| 11/20/2013 3:00  | 0.04247527 | 11/4/2013 18:40 | 0.2032 |
| 11/20/2013 3:15  | 0.04247527 | 11/4/2013 18:50 | 0.2032 |
| 11/20/2013 3:30  | 0.04247527 | 11/4/2013 19:00 | 0.2032 |
| 11/20/2013 3:45  | 0.04247527 | 11/4/2013 19:10 | 0.2032 |
| 11/20/2013 4:00  | 0.04247527 | 11/4/2013 19:20 | 0.2032 |
| 11/20/2013 4:15  | 0.04247527 | 11/4/2013 19:30 | 0.2032 |
| 11/20/2013 4:30  | 0.04247527 | 11/4/2013 19:40 | 0.2032 |
| 11/20/2013 4:45  | 0.04247527 | 11/4/2013 19:50 | 0.2032 |
| 11/20/2013 5:00  | 0.04247527 | 11/4/2013 20:00 | 0.2032 |
| 11/20/2013 5:15  | 0.04247527 | 11/4/2013 20:10 | 0.2032 |
| 11/20/2013 5:30  | 0.04247527 | 11/4/2013 20:20 | 0.2032 |
| 11/20/2013 5:45  | 0.04247527 | 11/4/2013 20:30 | 0.2032 |
| 11/20/2013 6:00  | 0.04247527 | 11/4/2013 20:40 | 0.2032 |
| 11/20/2013 6:15  | 0.04247527 | 11/4/2013 20:50 | 0.2032 |
| 11/20/2013 6:30  | 0.04247527 | 11/4/2013 21:00 | 0.2032 |
| 11/20/2013 6:45  | 0.04247527 | 11/4/2013 21:10 | 0.2032 |
| 11/20/2013 7:00  | 0.04247527 | 11/4/2013 21:20 | 0.2032 |
| 11/20/2013 7:15  | 0.04247527 | 11/4/2013 21:30 | 0.2032 |
| 11/20/2013 7:30  | 0.04247527 | 11/4/2013 21:40 | 0.2032 |
| 11/20/2013 7:45  | 0.04247527 | 11/4/2013 21:50 | 0.2032 |
| 11/20/2013 8:00  | 0.04247527 | 11/4/2013 22:00 | 0.2032 |
| 11/20/2013 8:15  | 0.04247527 | 11/4/2013 22:10 | 0.2032 |
| 11/20/2013 8:30  | 0.04247527 | 11/4/2013 22:20 | 0.2032 |
| 11/20/2013 8:45  | 0.04247527 | 11/4/2013 22:30 | 0.2032 |
| 11/20/2013 9:00  | 0.04247527 | 11/4/2013 22:40 | 0.2032 |
| 11/20/2013 9:15  | 0.04247527 | 11/4/2013 22:50 | 0.2032 |
| 11/20/2013 9:30  | 0.04247527 | 11/4/2013 23:00 | 0.2032 |
| 11/20/2013 9:45  | 0.04247527 | 11/4/2013 23:10 | 0      |
| 11/20/2013 10:00 | 0.04247527 | 11/4/2013 23:20 | 0      |

|                  |            |                 |   |
|------------------|------------|-----------------|---|
| 11/20/2013 10:15 | 0.04247527 | 11/4/2013 23:30 | 0 |
| 11/20/2013 10:30 | 0.04247527 | 11/4/2013 23:40 | 0 |
| 11/20/2013 10:45 | 0.04247527 | 11/4/2013 23:50 | 0 |
| 11/20/2013 11:00 | 0.04247527 | 11/5/2013 0:00  | 0 |
| 11/20/2013 11:15 | 0.04247527 | 11/5/2013 0:10  | 0 |
| 11/20/2013 11:30 | 0.04247527 | 11/5/2013 0:20  | 0 |
| 11/20/2013 11:45 | 0.04247527 | 11/5/2013 0:30  | 0 |
| 11/20/2013 12:00 | 0.04247527 | 11/5/2013 0:40  | 0 |
| 11/20/2013 12:15 | 0.04247527 | 11/5/2013 0:50  | 0 |
| 11/20/2013 12:30 | 0.04247527 | 11/5/2013 1:00  | 0 |
| 11/20/2013 12:45 | 0.04247527 | 11/5/2013 1:10  | 0 |
| 11/20/2013 13:00 | 0.04247527 | 11/5/2013 1:20  | 0 |
| 11/20/2013 13:15 | 0.04247527 | 11/5/2013 1:30  | 0 |
| 11/20/2013 13:30 | 0.04247527 | 11/5/2013 1:40  | 0 |
| 11/20/2013 13:45 | 0.04247527 | 11/5/2013 1:50  | 0 |
| 11/20/2013 14:00 | 0.04247527 | 11/5/2013 2:00  | 0 |
| 11/20/2013 14:15 | 0.04247527 | 11/5/2013 2:10  | 0 |
| 11/20/2013 14:30 | 0.04247527 | 11/5/2013 2:20  | 0 |
| 11/20/2013 14:45 | 0.04247527 | 11/5/2013 2:30  | 0 |
| 11/20/2013 15:00 | 0.04247527 | 11/5/2013 2:40  | 0 |
| 11/20/2013 15:15 | 0.04247527 | 11/5/2013 2:50  | 0 |
| 11/20/2013 15:30 | 0.04247527 | 11/5/2013 3:00  | 0 |
| 11/20/2013 15:45 | 0.04247527 | 11/5/2013 3:10  | 0 |
| 11/20/2013 16:00 | 0.04247527 | 11/5/2013 3:20  | 0 |
| 11/20/2013 16:15 | 0.04247527 | 11/5/2013 3:30  | 0 |
| 11/20/2013 16:30 | 0.04247527 | 11/5/2013 3:40  | 0 |
| 11/20/2013 16:45 | 0.04247527 | 11/5/2013 3:50  | 0 |
| 11/20/2013 17:00 | 0.04247527 | 11/5/2013 4:00  | 0 |
| 11/20/2013 17:15 | 0.04247527 | 11/5/2013 4:10  | 0 |
| 11/20/2013 17:30 | 0.04247527 | 11/5/2013 4:20  | 0 |
| 11/20/2013 17:45 | 0.04247527 | 11/5/2013 4:30  | 0 |
| 11/20/2013 18:00 | 0.04247527 | 11/5/2013 4:40  | 0 |
| 11/20/2013 18:15 | 0.04247527 | 11/5/2013 4:50  | 0 |
| 11/20/2013 18:30 | 0.04247527 | 11/5/2013 5:00  | 0 |
| 11/20/2013 18:45 | 0.04247527 | 11/5/2013 5:10  | 0 |
| 11/20/2013 19:00 | 0.04247527 | 11/5/2013 5:20  | 0 |
| 11/20/2013 19:15 | 0.04247527 | 11/5/2013 5:30  | 0 |
| 11/20/2013 19:30 | 0.04247527 | 11/5/2013 5:40  | 0 |
| 11/20/2013 19:45 | 0.04247527 | 11/5/2013 5:50  | 0 |
| 11/20/2013 20:00 | 0.04247527 | 11/5/2013 6:00  | 0 |
| 11/20/2013 20:15 | 0.04247527 | 11/5/2013 6:10  | 0 |
| 11/20/2013 20:30 | 0.04247527 | 11/5/2013 6:20  | 0 |
| 11/20/2013 20:45 | 0.04247527 | 11/5/2013 6:30  | 0 |
| 11/20/2013 21:00 | 0.04247527 | 11/5/2013 6:40  | 0 |
| 11/20/2013 21:15 | 0.04247527 | 11/5/2013 6:50  | 0 |
| 11/20/2013 21:30 | 0.04247527 | 11/5/2013 7:00  | 0 |
| 11/20/2013 21:45 | 0.04247527 | 11/5/2013 7:10  | 0 |



|                  |             |                 |        |
|------------------|-------------|-----------------|--------|
| 11/20/2013 22:00 | 0.04247527  | 11/5/2013 7:20  | 0      |
| 11/20/2013 22:15 | 0.04247527  | 11/5/2013 7:30  | 0      |
| 11/20/2013 22:30 | 0.04247527  | 11/5/2013 7:40  | 0      |
| 11/20/2013 22:45 | 0.04247527  | 11/5/2013 7:50  | 0      |
| 11/20/2013 23:00 | 0.04247527  | 11/5/2013 8:00  | 0      |
| 11/20/2013 23:15 | 0.04247527  | 11/5/2013 8:10  | 0      |
| 11/20/2013 23:30 | 0.04247527  | 11/5/2013 8:20  | 0      |
| 11/20/2013 23:45 | 0.04247527  | 11/5/2013 8:30  | 0      |
| 11/21/2013 0:00  | 0.04247527  | 11/5/2013 8:40  | 0      |
| 11/21/2013 0:15  | 0.04247527  | 11/5/2013 8:50  | 0      |
| 11/21/2013 0:30  | 0.04247527  | 11/5/2013 9:00  | 0      |
| 11/21/2013 0:45  | 0.04247527  | 11/5/2013 9:10  | 0      |
| 11/21/2013 1:00  | 0.04247527  | 11/5/2013 9:20  | 0      |
| 11/21/2013 1:15  | 0.04247527  | 11/5/2013 9:30  | 0      |
| 11/21/2013 1:30  | 0.04247527  | 11/5/2013 9:40  | 0      |
| 11/21/2013 1:45  | 0.04247527  | 11/5/2013 9:50  | 0      |
| 11/21/2013 2:00  | 0.04247527  | 11/5/2013 10:00 | 0.0254 |
| 11/21/2013 2:15  | 0.04247527  | 11/5/2013 10:10 | 0.0254 |
| 11/21/2013 2:30  | 0.04247527  | 11/5/2013 10:20 | 0.0254 |
| 11/21/2013 2:45  | 0.04247527  | 11/5/2013 10:30 | 0.0254 |
| 11/21/2013 3:00  | 0.04247527  | 11/5/2013 10:40 | 0.0254 |
| 11/21/2013 3:15  | 0.04247527  | 11/5/2013 10:50 | 0.0254 |
| 11/21/2013 3:30  | 0.04247527  | 11/5/2013 11:00 | 0.0254 |
| 11/21/2013 3:45  | 0.04247527  | 11/5/2013 11:10 | 0.0254 |
| 11/21/2013 4:00  | 0.04247527  | 11/5/2013 11:20 | 0.0254 |
| 11/21/2013 4:15  | 0.04247527  | 11/5/2013 11:30 | 0.0254 |
| 11/21/2013 4:30  | 0.04247527  | 11/5/2013 11:40 | 0.0508 |
| 11/21/2013 4:45  | 0.04247527  | 11/5/2013 11:50 | 0.0508 |
| 11/21/2013 5:00  | 0.04247527  | 11/5/2013 12:00 | 0.0508 |
| 11/21/2013 5:15  | 0.04247527  | 11/5/2013 12:10 | 0.0508 |
| 11/21/2013 5:30  | 0.04247527  | 11/5/2013 12:20 | 0.0508 |
| 11/21/2013 5:45  | 0.04247527  | 11/5/2013 12:30 | 0.0508 |
| 11/21/2013 6:00  | 0.04247527  | 11/5/2013 12:40 | 0.0508 |
| 11/21/2013 6:15  | 0.04247527  | 11/5/2013 12:50 | 0.0508 |
| 11/21/2013 6:30  | 0.04247527  | 11/5/2013 13:00 | 0.0762 |
| 11/21/2013 6:45  | 0.04247527  | 11/5/2013 13:10 | 0.1016 |
| 11/21/2013 7:00  | 0.04247527  | 11/5/2013 13:20 | 0.127  |
| 11/21/2013 7:15  | 0.04247527  | 11/5/2013 13:30 | 0.1524 |
| 11/21/2013 7:30  | 0.04247527  | 11/5/2013 13:40 | 0.1778 |
| 11/21/2013 7:45  | 0.04247527  | 11/5/2013 13:50 | 0.2032 |
| 11/21/2013 8:00  | 0.04247527  | 11/5/2013 14:00 | 0.2032 |
| 11/21/2013 8:15  | 0.039643585 | 11/5/2013 14:10 | 0.2032 |
| 11/21/2013 8:30  | 0.04247527  | 11/5/2013 14:20 | 0.2286 |
| 11/21/2013 8:45  | 0.04247527  | 11/5/2013 14:30 | 0.2286 |
| 11/21/2013 9:00  | 0.039643585 | 11/5/2013 14:40 | 0.254  |
| 11/21/2013 9:15  | 0.04247527  | 11/5/2013 14:50 | 0.254  |
| 11/21/2013 9:30  | 0.04247527  | 11/5/2013 15:00 | 0.3048 |

|                  |             |                 |        |
|------------------|-------------|-----------------|--------|
| 11/21/2013 9:45  | 0.039643585 | 11/5/2013 15:10 | 0.3556 |
| 11/21/2013 10:00 | 0.04247527  | 11/5/2013 15:20 | 0.381  |
| 11/21/2013 10:15 | 0.04247527  | 11/5/2013 15:30 | 0.4064 |
| 11/21/2013 10:30 | 0.04247527  | 11/5/2013 15:40 | 0.4826 |
| 11/21/2013 10:45 | 0.04247527  | 11/5/2013 15:50 | 0.5334 |
| 11/21/2013 11:00 | 0.04247527  | 11/5/2013 16:00 | 0.5334 |
| 11/21/2013 11:15 | 0.04247527  | 11/5/2013 16:10 | 0.5842 |
| 11/21/2013 11:30 | 0.039643585 | 11/5/2013 16:20 | 0.6096 |
| 11/21/2013 11:45 | 0.039643585 | 11/5/2013 16:30 | 0.6096 |
| 11/21/2013 12:00 | 0.04247527  | 11/5/2013 16:40 | 0.6096 |
| 11/21/2013 12:15 | 0.039643585 | 11/5/2013 16:50 | 0.6096 |
| 11/21/2013 12:30 | 0.039643585 | 11/5/2013 17:00 | 0.6096 |
| 11/21/2013 12:45 | 0.039643585 | 11/5/2013 17:10 | 0.635  |
| 11/21/2013 13:00 | 0.039643585 | 11/5/2013 17:20 | 0.6604 |
| 11/21/2013 13:15 | 0.04247527  | 11/5/2013 17:30 | 0.6858 |
| 11/21/2013 13:30 | 0.039643585 | 11/5/2013 17:40 | 0.7366 |
| 11/21/2013 13:45 | 0.039643585 | 11/5/2013 17:50 | 0.8128 |
| 11/21/2013 14:00 | 0.039643585 | 11/5/2013 18:00 | 0.889  |
| 11/21/2013 14:15 | 0.04247527  | 11/5/2013 18:10 | 0.9144 |
| 11/21/2013 14:30 | 0.039643585 | 11/5/2013 18:20 | 0.9144 |
| 11/21/2013 14:45 | 0.039643585 | 11/5/2013 18:30 | 0.9398 |
| 11/21/2013 15:00 | 0.039643585 | 11/5/2013 18:40 | 0.9398 |
| 11/21/2013 15:15 | 0.039643585 | 11/5/2013 18:50 | 0.9398 |
| 11/21/2013 15:30 | 0.039643585 | 11/5/2013 19:00 | 0.9652 |
| 11/21/2013 15:45 | 0.039643585 | 11/5/2013 19:10 | 0.9652 |
| 11/21/2013 16:00 | 0.039643585 | 11/5/2013 19:20 | 0.9652 |
| 11/21/2013 16:15 | 0.039643585 | 11/5/2013 19:30 | 0.9652 |
| 11/21/2013 16:30 | 0.039643585 | 11/5/2013 19:40 | 0.9906 |
| 11/21/2013 16:45 | 0.039643585 | 11/5/2013 19:50 | 0.9906 |
| 11/21/2013 17:00 | 0.039643585 | 11/5/2013 20:00 | 0.9906 |
| 11/21/2013 17:15 | 0.039643585 | 11/5/2013 20:10 | 0.9906 |
| 11/21/2013 17:30 | 0.039643585 | 11/5/2013 20:20 | 0.9906 |
| 11/21/2013 17:45 | 0.039643585 | 11/5/2013 20:30 | 0.9906 |
| 11/21/2013 18:00 | 0.04247527  | 11/5/2013 20:40 | 0.9906 |
| 11/21/2013 18:15 | 0.039643585 | 11/5/2013 20:50 | 0.9906 |
| 11/21/2013 18:30 | 0.04247527  | 11/5/2013 21:00 | 1.016  |
| 11/21/2013 18:45 | 0.039643585 | 11/5/2013 21:10 | 1.016  |
| 11/21/2013 19:00 | 0.039643585 | 11/5/2013 21:20 | 1.016  |
| 11/21/2013 19:15 | 0.039643585 | 11/5/2013 21:30 | 1.0414 |
| 11/21/2013 19:30 | 0.04247527  | 11/5/2013 21:40 | 1.0414 |
| 11/21/2013 19:45 | 0.039643585 | 11/5/2013 21:50 | 1.0668 |
| 11/21/2013 20:00 | 0.039643585 | 11/5/2013 22:00 | 1.0668 |
| 11/21/2013 20:15 | 0.04247527  | 11/5/2013 22:10 | 1.0922 |
| 11/21/2013 20:30 | 0.04247527  | 11/5/2013 22:20 | 1.143  |
| 11/21/2013 20:45 | 0.039643585 | 11/5/2013 22:30 | 1.2192 |
| 11/21/2013 21:00 | 0.039643585 | 11/5/2013 22:40 | 1.2954 |
| 11/21/2013 21:15 | 0.039643585 | 11/5/2013 22:50 | 1.3208 |

|                  |             |                 |        |
|------------------|-------------|-----------------|--------|
| 11/21/2013 21:30 | 0.039643585 | 11/5/2013 23:00 | 1.3716 |
| 11/21/2013 21:45 | 0.039643585 | 11/5/2013 23:10 | 0      |
| 11/21/2013 22:00 | 0.039643585 | 11/5/2013 23:20 | 0      |
| 11/21/2013 22:15 | 0.04247527  | 11/5/2013 23:30 | 0      |
| 11/21/2013 22:30 | 0.04247527  | 11/5/2013 23:40 | 0      |
| 11/21/2013 22:45 | 0.039643585 | 11/5/2013 23:50 | 0      |
| 11/21/2013 23:00 | 0.039643585 | 11/6/2013 0:00  | 0      |
| 11/21/2013 23:15 | 0.039643585 | 11/6/2013 0:10  | 0      |
| 11/21/2013 23:30 | 0.039643585 | 11/6/2013 0:20  | 0      |
| 11/21/2013 23:45 | 0.039643585 | 11/6/2013 0:30  | 0      |
| 11/22/2013 0:00  | 0.04247527  | 11/6/2013 0:40  | 0      |
| 11/22/2013 0:15  | 0.039643585 | 11/6/2013 0:50  | 0      |
| 11/22/2013 0:30  | 0.04247527  | 11/6/2013 1:00  | 0      |
| 11/22/2013 0:45  | 0.04247527  | 11/6/2013 1:10  | 0      |
| 11/22/2013 1:00  | 0.039643585 | 11/6/2013 1:20  | 0      |
| 11/22/2013 1:15  | 0.039643585 | 11/6/2013 1:30  | 0      |
| 11/22/2013 1:30  | 0.04247527  | 11/6/2013 1:40  | 0      |
| 11/22/2013 1:45  | 0.04247527  | 11/6/2013 1:50  | 0      |
| 11/22/2013 2:00  | 0.04247527  | 11/6/2013 2:00  | 0      |
| 11/22/2013 2:15  | 0.04247527  | 11/6/2013 2:10  | 0      |
| 11/22/2013 2:30  | 0.039643585 | 11/6/2013 2:20  | 0      |
| 11/22/2013 2:45  | 0.04247527  | 11/6/2013 2:30  | 0      |
| 11/22/2013 3:00  | 0.04247527  | 11/6/2013 2:40  | 0      |
| 11/22/2013 3:15  | 0.04247527  | 11/6/2013 2:50  | 0      |
| 11/22/2013 3:30  | 0.04247527  | 11/6/2013 3:00  | 0      |
| 11/22/2013 3:45  | 0.04247527  | 11/6/2013 3:10  | 0      |
| 11/22/2013 4:00  | 0.039643585 | 11/6/2013 3:20  | 0      |
| 11/22/2013 4:15  | 0.039643585 | 11/6/2013 3:30  | 0      |
| 11/22/2013 4:30  | 0.04247527  | 11/6/2013 3:40  | 0      |
| 11/22/2013 4:45  | 0.039643585 | 11/6/2013 3:50  | 0      |
| 11/22/2013 5:00  | 0.039643585 | 11/6/2013 4:00  | 0      |
| 11/22/2013 5:15  | 0.04247527  | 11/6/2013 4:10  | 0      |
| 11/22/2013 5:30  | 0.039643585 | 11/6/2013 4:20  | 0      |
| 11/22/2013 5:45  | 0.039643585 | 11/6/2013 4:30  | 0      |
| 11/22/2013 6:00  | 0.039643585 | 11/6/2013 4:40  | 0      |
| 11/22/2013 6:15  | 0.039643585 | 11/6/2013 4:50  | 0.0254 |
| 11/22/2013 6:30  | 0.039643585 | 11/6/2013 5:00  | 0.0254 |
| 11/22/2013 6:45  | 0.039643585 | 11/6/2013 5:10  | 0.0254 |
| 11/22/2013 7:00  | 0.039643585 | 11/6/2013 5:20  | 0.0254 |
| 11/22/2013 7:15  | 0.039643585 | 11/6/2013 5:30  | 0.0254 |
| 11/22/2013 7:30  | 0.039643585 | 11/6/2013 5:40  | 0.0254 |
| 11/22/2013 7:45  | 0.039643585 | 11/6/2013 5:50  | 0.0254 |
| 11/22/2013 8:00  | 0.039643585 | 11/6/2013 6:00  | 0.0254 |
| 11/22/2013 8:15  | 0.039643585 | 11/6/2013 6:10  | 0.0254 |
| 11/22/2013 8:30  | 0.036811901 | 11/6/2013 6:20  | 0.0254 |
| 11/22/2013 8:45  | 0.039643585 | 11/6/2013 6:30  | 0.0254 |
| 11/22/2013 9:00  | 0.039643585 | 11/6/2013 6:40  | 0.0254 |

|                  |             |                 |        |
|------------------|-------------|-----------------|--------|
| 11/22/2013 9:15  | 0.039643585 | 11/6/2013 6:50  | 0.0254 |
| 11/22/2013 9:30  | 0.039643585 | 11/6/2013 7:00  | 0.0254 |
| 11/22/2013 9:45  | 0.039643585 | 11/6/2013 7:10  | 0.0254 |
| 11/22/2013 10:00 | 0.039643585 | 11/6/2013 7:20  | 0.0254 |
| 11/22/2013 10:15 | 0.039643585 | 11/6/2013 7:30  | 0.0254 |
| 11/22/2013 10:30 | 0.039643585 | 11/6/2013 7:40  | 0.0254 |
| 11/22/2013 10:45 | 0.039643585 | 11/6/2013 7:50  | 0.0254 |
| 11/22/2013 11:00 | 0.039643585 | 11/6/2013 8:00  | 0.0254 |
| 11/22/2013 11:15 | 0.039643585 | 11/6/2013 8:10  | 0.0254 |
| 11/22/2013 11:30 | 0.039643585 | 11/6/2013 8:20  | 0.0254 |
| 11/22/2013 11:45 | 0.039643585 | 11/6/2013 8:30  | 0.0254 |
| 11/22/2013 12:00 | 0.039643585 | 11/6/2013 8:40  | 0.0254 |
| 11/22/2013 12:15 | 0.039643585 | 11/6/2013 8:50  | 0.0254 |
| 11/22/2013 12:30 | 0.039643585 | 11/6/2013 9:00  | 0.0254 |
| 11/22/2013 12:45 | 0.039643585 | 11/6/2013 9:10  | 0.0254 |
| 11/22/2013 13:00 | 0.04247527  | 11/6/2013 9:20  | 0.0254 |
| 11/22/2013 13:15 | 0.039643585 | 11/6/2013 9:30  | 0.0254 |
| 11/22/2013 13:30 | 0.039643585 | 11/6/2013 9:40  | 0.0254 |
| 11/22/2013 13:45 | 0.04247527  | 11/6/2013 9:50  | 0.0254 |
| 11/22/2013 14:00 | 0.039643585 | 11/6/2013 10:00 | 0.0254 |
| 11/22/2013 14:15 | 0.039643585 | 11/6/2013 10:10 | 0.0254 |
| 11/22/2013 14:30 | 0.039643585 | 11/6/2013 10:20 | 0.0254 |
| 11/22/2013 14:45 | 0.039643585 | 11/6/2013 10:30 | 0.0254 |
| 11/22/2013 15:00 | 0.039643585 | 11/6/2013 10:40 | 0.0254 |
| 11/22/2013 15:15 | 0.039643585 | 11/6/2013 10:50 | 0.0254 |
| 11/22/2013 15:30 | 0.039643585 | 11/6/2013 11:00 | 0.0254 |
| 11/22/2013 15:45 | 0.039643585 | 11/6/2013 11:10 | 0.0254 |
| 11/22/2013 16:00 | 0.039643585 | 11/6/2013 11:20 | 0.0254 |
| 11/22/2013 16:15 | 0.039643585 | 11/6/2013 11:30 | 0.0254 |
| 11/22/2013 16:30 | 0.039643585 | 11/6/2013 11:40 | 0.0254 |
| 11/22/2013 16:45 | 0.039643585 | 11/6/2013 11:50 | 0.0254 |
| 11/22/2013 17:00 | 0.04247527  | 11/6/2013 12:00 | 0.0254 |
| 11/22/2013 17:15 | 0.04247527  | 11/6/2013 12:10 | 0.0254 |
| 11/22/2013 17:30 | 0.04247527  | 11/6/2013 12:20 | 0.0254 |
| 11/22/2013 17:45 | 0.04247527  | 11/6/2013 12:30 | 0.0254 |
| 11/22/2013 18:00 | 0.04247527  | 11/6/2013 12:40 | 0.0254 |
| 11/22/2013 18:15 | 0.04247527  | 11/6/2013 12:50 | 0.0254 |
| 11/22/2013 18:30 | 0.04247527  | 11/6/2013 13:00 | 0.0254 |
| 11/22/2013 18:45 | 0.04247527  | 11/6/2013 13:10 | 0.0254 |
| 11/22/2013 19:00 | 0.04247527  | 11/6/2013 13:20 | 0.0254 |
| 11/22/2013 19:15 | 0.04247527  | 11/6/2013 13:30 | 0.0254 |
| 11/22/2013 19:30 | 0.04247527  | 11/6/2013 13:40 | 0.0254 |
| 11/22/2013 19:45 | 0.04247527  | 11/6/2013 13:50 | 0.0254 |
| 11/22/2013 20:00 | 0.04247527  | 11/6/2013 14:00 | 0.0254 |
| 11/22/2013 20:15 | 0.04247527  | 11/6/2013 14:10 | 0.0254 |
| 11/22/2013 20:30 | 0.04247527  | 11/6/2013 14:30 | 0.0254 |
| 11/22/2013 20:45 | 0.04247527  | 11/6/2013 14:40 | 0.0254 |

|                  |             |                 |        |
|------------------|-------------|-----------------|--------|
| 11/22/2013 21:00 | 0.04247527  | 11/6/2013 14:50 | 0.0254 |
| 11/22/2013 21:15 | 0.04247527  | 11/6/2013 15:00 | 0.0254 |
| 11/22/2013 21:30 | 0.04247527  | 11/6/2013 15:10 | 0.0254 |
| 11/22/2013 21:45 | 0.04247527  | 11/6/2013 15:20 | 0.0254 |
| 11/22/2013 22:00 | 0.04247527  | 11/6/2013 15:30 | 0.0254 |
| 11/22/2013 22:15 | 0.04247527  | 11/6/2013 15:40 | 0.0254 |
| 11/22/2013 22:30 | 0.039643585 | 11/6/2013 15:50 | 0.0254 |
| 11/22/2013 22:45 | 0.039643585 | 11/6/2013 16:00 | 0.0254 |
| 11/22/2013 23:00 | 0.04247527  | 11/6/2013 16:10 | 0.0254 |
| 11/22/2013 23:15 | 0.04247527  | 11/6/2013 16:20 | 0.0254 |
| 11/22/2013 23:30 | 0.04247527  | 11/6/2013 16:30 | 0.0254 |
| 11/22/2013 23:45 | 0.039643585 | 11/6/2013 16:40 | 0.0254 |
| 11/23/2013 0:00  | 0.039643585 | 11/6/2013 16:50 | 0.0254 |
| 11/23/2013 0:15  | 0.04247527  | 11/6/2013 17:00 | 0.0254 |
| 11/23/2013 0:30  | 0.04247527  | 11/6/2013 17:10 | 0.0254 |
| 11/23/2013 0:45  | 0.04247527  | 11/6/2013 17:20 | 0.0254 |
| 11/23/2013 1:00  | 0.04247527  | 11/6/2013 17:30 | 0.0254 |
| 11/23/2013 1:15  | 0.04247527  | 11/6/2013 17:40 | 0.0254 |
| 11/23/2013 1:30  | 0.04247527  | 11/6/2013 17:50 | 0.0254 |
| 11/23/2013 1:45  | 0.04247527  | 11/6/2013 18:00 | 0.0254 |
| 11/23/2013 2:00  | 0.04247527  | 11/6/2013 18:10 | 0.0254 |
| 11/23/2013 2:15  | 0.04247527  | 11/6/2013 18:20 | 0.0254 |
| 11/23/2013 2:30  | 0.04247527  | 11/6/2013 18:30 | 0.0254 |
| 11/23/2013 2:45  | 0.045306955 | 11/6/2013 18:40 | 0.0254 |
| 11/23/2013 3:00  | 0.045306955 | 11/6/2013 18:50 | 0.0254 |
| 11/23/2013 3:15  | 0.045306955 | 11/6/2013 19:00 | 0.0254 |
| 11/23/2013 3:30  | 0.045306955 | 11/6/2013 19:10 | 0.0254 |
| 11/23/2013 3:45  | 0.045306955 | 11/6/2013 19:20 | 0.0254 |
| 11/23/2013 4:00  | 0.045306955 | 11/6/2013 19:30 | 0.0254 |
| 11/23/2013 4:15  | 0.045306955 | 11/6/2013 19:40 | 0.0254 |
| 11/23/2013 4:30  | 0.045306955 | 11/6/2013 19:50 | 0.0254 |
| 11/23/2013 4:45  | 0.045306955 | 11/6/2013 20:00 | 0.0254 |
| 11/23/2013 5:00  | 0.045306955 | 11/6/2013 20:10 | 0.0254 |
| 11/23/2013 5:15  | 0.045306955 | 11/6/2013 20:20 | 0.0254 |
| 11/23/2013 5:30  | 0.045306955 | 11/6/2013 20:30 | 0.0254 |
| 11/23/2013 5:45  | 0.045306955 | 11/6/2013 20:40 | 0.0254 |
| 11/23/2013 6:00  | 0.045306955 | 11/6/2013 20:50 | 0.0254 |
| 11/23/2013 6:15  | 0.045306955 | 11/6/2013 21:00 | 0.0254 |
| 11/23/2013 6:30  | 0.045306955 | 11/6/2013 21:10 | 0.0254 |
| 11/23/2013 6:45  | 0.045306955 | 11/6/2013 21:20 | 0.0254 |
| 11/23/2013 7:00  | 0.045306955 | 11/6/2013 21:30 | 0.0254 |
| 11/23/2013 7:15  | 0.04247527  | 11/6/2013 21:40 | 0.0254 |
| 11/23/2013 7:30  | 0.045306955 | 11/6/2013 21:50 | 0.0254 |
| 11/23/2013 7:45  | 0.045306955 | 11/6/2013 22:00 | 0.0254 |
| 11/23/2013 8:00  | 0.045306955 | 11/6/2013 22:10 | 0.0254 |
| 11/23/2013 8:15  | 0.045306955 | 11/6/2013 22:20 | 0.0254 |
| 11/23/2013 8:30  | 0.04247527  | 11/6/2013 22:30 | 0.0254 |

|                  |             |                 |        |
|------------------|-------------|-----------------|--------|
| 11/23/2013 8:45  | 0.045306955 | 11/6/2013 22:40 | 0.0254 |
| 11/23/2013 9:00  | 0.04247527  | 11/6/2013 22:50 | 0.0254 |
| 11/23/2013 9:15  | 0.04247527  | 11/6/2013 23:00 | 0.0254 |
| 11/23/2013 9:30  | 0.04247527  | 11/6/2013 23:10 | 0      |
| 11/23/2013 9:45  | 0.04247527  | 11/6/2013 23:20 | 0      |
| 11/23/2013 10:00 | 0.04247527  | 11/6/2013 23:30 | 0      |
| 11/23/2013 10:15 | 0.04247527  | 11/6/2013 23:40 | 0      |
| 11/23/2013 10:30 | 0.045306955 | 11/6/2013 23:50 | 0      |
| 11/23/2013 10:45 | 0.04247527  | 11/7/2013 0:00  | 0      |
| 11/23/2013 11:00 | 0.04247527  | 11/7/2013 0:10  | 0      |
| 11/23/2013 11:15 | 0.04247527  | 11/7/2013 0:20  | 0      |
| 11/23/2013 11:30 | 0.04247527  | 11/7/2013 0:30  | 0      |
| 11/23/2013 11:45 | 0.04247527  | 11/7/2013 0:40  | 0      |
| 11/23/2013 12:00 | 0.04247527  | 11/7/2013 0:50  | 0      |
| 11/23/2013 12:15 | 0.04247527  | 11/7/2013 1:00  | 0      |
| 11/23/2013 12:30 | 0.04247527  | 11/7/2013 1:10  | 0      |
| 11/23/2013 12:45 | 0.04247527  | 11/7/2013 1:20  | 0      |
| 11/23/2013 13:00 | 0.04247527  | 11/7/2013 1:30  | 0      |
| 11/23/2013 13:15 | 0.04247527  | 11/7/2013 1:40  | 0      |
| 11/23/2013 13:30 | 0.04247527  | 11/7/2013 1:50  | 0      |
| 11/23/2013 13:45 | 0.04247527  | 11/7/2013 2:00  | 0      |
| 11/23/2013 14:00 | 0.04247527  | 11/7/2013 2:10  | 0      |
| 11/23/2013 14:15 | 0.04247527  | 11/7/2013 2:20  | 0      |
| 11/23/2013 14:30 | 0.04247527  | 11/7/2013 2:30  | 0      |
| 11/23/2013 14:45 | 0.04247527  | 11/7/2013 2:40  | 0      |
| 11/23/2013 15:00 | 0.04247527  | 11/7/2013 2:50  | 0      |
| 11/23/2013 15:15 | 0.04247527  | 11/7/2013 3:00  | 0      |
| 11/23/2013 15:30 | 0.04247527  | 11/7/2013 3:10  | 0      |
| 11/23/2013 15:45 | 0.039643585 | 11/7/2013 3:20  | 0      |
| 11/23/2013 16:00 | 0.04247527  | 11/7/2013 3:30  | 0      |
| 11/23/2013 16:15 | 0.04247527  | 11/7/2013 3:40  | 0      |
| 11/23/2013 16:30 | 0.039643585 | 11/7/2013 3:50  | 0      |
| 11/23/2013 16:45 | 0.04247527  | 11/7/2013 4:00  | 0      |
| 11/23/2013 17:00 | 0.039643585 | 11/7/2013 4:10  | 0      |
| 11/23/2013 17:15 | 0.039643585 | 11/7/2013 4:20  | 0      |
| 11/23/2013 17:30 | 0.039643585 | 11/7/2013 4:30  | 0      |
| 11/23/2013 17:45 | 0.039643585 | 11/7/2013 4:40  | 0      |
| 11/23/2013 18:00 | 0.04247527  | 11/7/2013 4:50  | 0      |
| 11/23/2013 18:15 | 0.04247527  | 11/7/2013 5:00  | 0      |
| 11/23/2013 18:30 | 0.039643585 | 11/7/2013 5:10  | 0      |
| 11/23/2013 18:45 | 0.039643585 | 11/7/2013 5:20  | 0      |
| 11/23/2013 19:00 | 0.039643585 | 11/7/2013 5:30  | 0      |
| 11/23/2013 19:15 | 0.039643585 | 11/7/2013 5:40  | 0      |
| 11/23/2013 19:30 | 0.039643585 | 11/7/2013 5:50  | 0      |
| 11/23/2013 19:45 | 0.036811901 | 11/7/2013 6:00  | 0      |
| 11/23/2013 20:00 | 0.039643585 | 11/7/2013 6:10  | 0      |
| 11/23/2013 20:15 | 0.039643585 | 11/7/2013 6:20  | 0      |

|                  |             |                 |   |
|------------------|-------------|-----------------|---|
| 11/23/2013 20:30 | 0.036811901 | 11/7/2013 6:30  | 0 |
| 11/23/2013 20:45 | 0.039643585 | 11/7/2013 6:40  | 0 |
| 11/23/2013 21:00 | 0.036811901 | 11/7/2013 6:50  | 0 |
| 11/23/2013 21:15 | 0.039643585 | 11/7/2013 7:00  | 0 |
| 11/23/2013 21:30 | 0.036811901 | 11/7/2013 7:10  | 0 |
| 11/23/2013 21:45 | 0.039643585 | 11/7/2013 7:20  | 0 |
| 11/23/2013 22:00 | 0.039643585 | 11/7/2013 7:30  | 0 |
| 11/23/2013 22:15 | 0.039643585 | 11/7/2013 7:40  | 0 |
| 11/23/2013 22:30 | 0.036811901 | 11/7/2013 7:50  | 0 |
| 11/23/2013 22:45 | 0.039643585 | 11/7/2013 8:00  | 0 |
| 11/23/2013 23:00 | 0.039643585 | 11/7/2013 8:10  | 0 |
| 11/23/2013 23:15 | 0.039643585 | 11/7/2013 8:20  | 0 |
| 11/23/2013 23:30 | 0.036811901 | 11/7/2013 8:30  | 0 |
| 11/23/2013 23:45 | 0.036811901 | 11/7/2013 8:40  | 0 |
| 11/24/2013 0:00  | 0.036811901 | 11/7/2013 8:50  | 0 |
| 11/24/2013 0:15  | 0.036811901 | 11/7/2013 9:00  | 0 |
| 11/24/2013 0:30  | 0.036811901 | 11/7/2013 9:10  | 0 |
| 11/24/2013 0:45  | 0.036811901 | 11/7/2013 9:20  | 0 |
| 11/24/2013 1:00  | 0.036811901 | 11/7/2013 9:30  | 0 |
| 11/24/2013 1:15  | 0.036811901 | 11/7/2013 9:40  | 0 |
| 11/24/2013 1:30  | 0.036811901 | 11/7/2013 9:50  | 0 |
| 11/24/2013 1:45  | 0.036811901 | 11/7/2013 10:00 | 0 |
| 11/24/2013 2:00  | 0.036811901 | 11/7/2013 10:10 | 0 |
| 11/24/2013 2:15  | 0.036811901 | 11/7/2013 10:20 | 0 |
| 11/24/2013 2:30  | 0.036811901 | 11/7/2013 10:30 | 0 |
| 11/24/2013 2:45  | 0.036811901 | 11/7/2013 10:40 | 0 |
| 11/24/2013 3:00  | 0.036811901 | 11/7/2013 10:50 | 0 |
| 11/24/2013 3:15  | 0.036811901 | 11/7/2013 11:00 | 0 |
| 11/24/2013 3:30  | 0.036811901 | 11/7/2013 11:10 | 0 |
| 11/24/2013 3:45  | 0.036811901 | 11/7/2013 11:20 | 0 |
| 11/24/2013 4:00  | 0.036811901 | 11/7/2013 11:30 | 0 |
| 11/24/2013 4:15  | 0.036811901 | 11/7/2013 11:40 | 0 |
| 11/24/2013 4:30  | 0.036811901 | 11/7/2013 11:50 | 0 |
| 11/24/2013 4:45  | 0.036811901 | 11/7/2013 12:00 | 0 |
| 11/24/2013 5:00  | 0.036811901 | 11/7/2013 12:10 | 0 |
| 11/24/2013 5:15  | 0.036811901 | 11/7/2013 12:20 | 0 |
| 11/24/2013 5:30  | 0.036811901 | 11/7/2013 12:30 | 0 |
| 11/24/2013 5:45  | 0.036811901 | 11/7/2013 12:40 | 0 |
| 11/24/2013 6:00  | 0.036811901 | 11/7/2013 12:50 | 0 |
| 11/24/2013 6:15  | 0.036811901 | 11/7/2013 13:00 | 0 |
| 11/24/2013 6:30  | 0.036811901 | 11/7/2013 13:10 | 0 |
| 11/24/2013 6:45  | 0.036811901 | 11/7/2013 13:20 | 0 |
| 11/24/2013 7:00  | 0.036811901 | 11/7/2013 13:30 | 0 |
| 11/24/2013 7:15  | 0.036811901 | 11/7/2013 13:40 | 0 |
| 11/24/2013 7:30  | 0.036811901 | 11/7/2013 13:50 | 0 |
| 11/24/2013 7:45  | 0.036811901 | 11/7/2013 14:00 | 0 |
| 11/24/2013 8:00  | 0.036811901 | 11/7/2013 14:10 | 0 |

|                  |             |                 |   |
|------------------|-------------|-----------------|---|
| 11/24/2013 8:15  | 0.036811901 | 11/7/2013 14:20 | 0 |
| 11/24/2013 8:30  | 0.036811901 | 11/7/2013 14:30 | 0 |
| 11/24/2013 8:45  | 0.036811901 | 11/7/2013 14:40 | 0 |
| 11/24/2013 9:00  | 0.036811901 | 11/7/2013 14:50 | 0 |
| 11/24/2013 9:15  | 0.036811901 | 11/7/2013 15:00 | 0 |
| 11/24/2013 9:30  | 0.036811901 | 11/7/2013 15:10 | 0 |
| 11/24/2013 9:45  | 0.036811901 | 11/7/2013 15:20 | 0 |
| 11/24/2013 10:00 | 0.036811901 | 11/7/2013 15:30 | 0 |
| 11/24/2013 10:15 | 0.036811901 | 11/7/2013 15:40 | 0 |
| 11/24/2013 10:30 | 0.036811901 | 11/7/2013 15:50 | 0 |
| 11/24/2013 10:45 | 0.036811901 | 11/7/2013 16:00 | 0 |
| 11/24/2013 11:00 | 0.036811901 | 11/7/2013 16:10 | 0 |
| 11/24/2013 11:15 | 0.036811901 | 11/7/2013 16:20 | 0 |
| 11/24/2013 11:30 | 0.036811901 | 11/7/2013 16:30 | 0 |
| 11/24/2013 11:45 | 0.036811901 | 11/7/2013 16:40 | 0 |
| 11/24/2013 12:00 | 0.036811901 | 11/7/2013 16:50 | 0 |
| 11/24/2013 12:15 | 0.036811901 | 11/7/2013 17:00 | 0 |
| 11/24/2013 12:30 | 0.036811901 | 11/7/2013 17:10 | 0 |
| 11/24/2013 12:45 | 0.036811901 | 11/7/2013 17:20 | 0 |
| 11/24/2013 13:00 | 0.036811901 | 11/7/2013 17:30 | 0 |
| 11/24/2013 13:15 | 0.036811901 | 11/7/2013 17:40 | 0 |
| 11/24/2013 13:30 | 0.036811901 | 11/7/2013 17:50 | 0 |
| 11/24/2013 13:45 | 0.036811901 | 11/7/2013 18:00 | 0 |
| 11/24/2013 14:00 | 0.036811901 | 11/7/2013 18:10 | 0 |
| 11/24/2013 14:15 | 0.036811901 | 11/7/2013 18:20 | 0 |
| 11/24/2013 14:30 | 0.036811901 | 11/7/2013 18:30 | 0 |
| 11/24/2013 14:45 | 0.036811901 | 11/7/2013 18:40 | 0 |
| 11/24/2013 15:00 | 0.036811901 | 11/7/2013 18:50 | 0 |
| 11/24/2013 15:15 | 0.036811901 | 11/7/2013 19:00 | 0 |
| 11/24/2013 15:30 | 0.036811901 | 11/7/2013 19:10 | 0 |
| 11/24/2013 15:45 | 0.036811901 | 11/7/2013 19:20 | 0 |
| 11/24/2013 16:00 | 0.036811901 | 11/7/2013 19:30 | 0 |
| 11/24/2013 16:15 | 0.036811901 | 11/7/2013 19:40 | 0 |
| 11/24/2013 16:30 | 0.036811901 | 11/7/2013 19:50 | 0 |
| 11/24/2013 16:45 | 0.036811901 | 11/7/2013 20:00 | 0 |
| 11/24/2013 17:00 | 0.036811901 | 11/7/2013 20:10 | 0 |
| 11/24/2013 17:15 | 0.036811901 | 11/7/2013 20:20 | 0 |
| 11/24/2013 17:30 | 0.036811901 | 11/7/2013 20:30 | 0 |
| 11/24/2013 17:45 | 0.036811901 | 11/7/2013 20:40 | 0 |
| 11/24/2013 18:00 | 0.036811901 | 11/7/2013 20:50 | 0 |
| 11/24/2013 18:15 | 0.036811901 | 11/7/2013 21:00 | 0 |
| 11/24/2013 18:30 | 0.036811901 | 11/7/2013 21:10 | 0 |
| 11/24/2013 18:45 | 0.036811901 | 11/7/2013 21:20 | 0 |
| 11/24/2013 19:00 | 0.036811901 | 11/7/2013 21:30 | 0 |
| 11/24/2013 19:15 | 0.036811901 | 11/7/2013 21:40 | 0 |
| 11/24/2013 19:30 | 0.036811901 | 11/7/2013 21:50 | 0 |
| 11/24/2013 19:45 | 0.036811901 | 11/7/2013 22:00 | 0 |



|                  |             |                 |   |
|------------------|-------------|-----------------|---|
| 11/24/2013 20:00 | 0.036811901 | 11/7/2013 22:10 | 0 |
| 11/24/2013 20:15 | 0.036811901 | 11/7/2013 22:20 | 0 |
| 11/24/2013 20:30 | 0.036811901 | 11/7/2013 22:30 | 0 |
| 11/24/2013 20:45 | 0.036811901 | 11/7/2013 22:40 | 0 |
| 11/24/2013 21:00 | 0.036811901 | 11/7/2013 22:50 | 0 |
| 11/24/2013 21:15 | 0.036811901 | 11/7/2013 23:00 | 0 |
| 11/24/2013 21:30 | 0.036811901 | 11/7/2013 23:10 | 0 |
| 11/24/2013 21:45 | 0.036811901 | 11/7/2013 23:20 | 0 |
| 11/24/2013 22:00 | 0.036811901 | 11/7/2013 23:30 | 0 |
| 11/24/2013 22:15 | 0.036811901 | 11/7/2013 23:40 | 0 |
| 11/24/2013 22:30 | 0.036811901 | 11/7/2013 23:50 | 0 |
| 11/24/2013 22:45 | 0.036811901 | 11/8/2013 0:00  | 0 |
| 11/24/2013 23:00 | 0.036811901 | 11/8/2013 0:10  | 0 |
| 11/24/2013 23:15 | 0.036811901 | 11/8/2013 0:20  | 0 |
| 11/24/2013 23:30 | 0.036811901 | 11/8/2013 0:30  | 0 |
| 11/24/2013 23:45 | 0.036811901 | 11/8/2013 0:40  | 0 |
| 11/25/2013 0:00  | 0.036811901 | 11/8/2013 0:50  | 0 |
| 11/25/2013 0:15  | 0.036811901 | 11/8/2013 1:00  | 0 |
| 11/25/2013 0:30  | 0.036811901 | 11/8/2013 1:10  | 0 |
| 11/25/2013 0:45  | 0.036811901 | 11/8/2013 1:20  | 0 |
| 11/25/2013 1:00  | 0.036811901 | 11/8/2013 1:30  | 0 |
| 11/25/2013 1:15  | 0.036811901 | 11/8/2013 1:40  | 0 |
| 11/25/2013 1:30  | 0.036811901 | 11/8/2013 1:50  | 0 |
| 11/25/2013 1:45  | 0.036811901 | 11/8/2013 2:00  | 0 |
| 11/25/2013 2:00  | 0.036811901 | 11/8/2013 2:10  | 0 |
| 11/25/2013 2:15  | 0.036811901 | 11/8/2013 2:20  | 0 |
| 11/25/2013 2:30  | 0.036811901 | 11/8/2013 2:30  | 0 |
| 11/25/2013 2:45  | 0.036811901 | 11/8/2013 2:40  | 0 |
| 11/25/2013 3:00  | 0.036811901 | 11/8/2013 2:50  | 0 |
| 11/25/2013 3:15  | 0.036811901 | 11/8/2013 3:00  | 0 |
| 11/25/2013 3:30  | 0.036811901 | 11/8/2013 3:10  | 0 |
| 11/25/2013 3:45  | 0.036811901 | 11/8/2013 3:20  | 0 |
| 11/25/2013 4:00  | 0.036811901 | 11/8/2013 3:30  | 0 |
| 11/25/2013 4:15  | 0.036811901 | 11/8/2013 3:40  | 0 |
| 11/25/2013 4:30  | 0.036811901 | 11/8/2013 3:50  | 0 |
| 11/25/2013 4:45  | 0.036811901 | 11/8/2013 4:00  | 0 |
| 11/25/2013 5:00  | 0.036811901 | 11/8/2013 4:10  | 0 |
| 11/25/2013 5:15  | 0.036811901 | 11/8/2013 4:20  | 0 |
| 11/25/2013 5:30  | 0.036811901 | 11/8/2013 4:30  | 0 |
| 11/25/2013 5:45  | 0.036811901 | 11/8/2013 4:40  | 0 |
| 11/25/2013 6:00  | 0.036811901 | 11/8/2013 4:50  | 0 |
| 11/25/2013 6:15  | 0.036811901 | 11/8/2013 5:00  | 0 |
| 11/25/2013 6:30  | 0.036811901 | 11/8/2013 5:10  | 0 |
| 11/25/2013 6:45  | 0.036811901 | 11/8/2013 5:20  | 0 |
| 11/25/2013 7:00  | 0.036811901 | 11/8/2013 5:30  | 0 |
| 11/25/2013 7:15  | 0.036811901 | 11/8/2013 5:40  | 0 |
| 11/25/2013 7:30  | 0.036811901 | 11/8/2013 5:50  | 0 |

|                  |             |                 |   |
|------------------|-------------|-----------------|---|
| 11/25/2013 7:45  | 0.036811901 | 11/8/2013 6:00  | 0 |
| 11/25/2013 8:00  | 0.036811901 | 11/8/2013 6:10  | 0 |
| 11/25/2013 8:15  | 0.036811901 | 11/8/2013 6:20  | 0 |
| 11/25/2013 8:30  | 0.036811901 | 11/8/2013 6:30  | 0 |
| 11/25/2013 8:45  | 0.036811901 | 11/8/2013 6:40  | 0 |
| 11/25/2013 9:00  | 0.036811901 | 11/8/2013 6:50  | 0 |
| 11/25/2013 9:15  | 0.036811901 | 11/8/2013 7:00  | 0 |
| 11/25/2013 9:30  | 0.036811901 | 11/8/2013 7:10  | 0 |
| 11/25/2013 9:45  | 0.036811901 | 11/8/2013 7:20  | 0 |
| 11/25/2013 10:00 | 0.036811901 | 11/8/2013 7:30  | 0 |
| 11/25/2013 10:15 | 0.036811901 | 11/8/2013 7:40  | 0 |
| 11/25/2013 10:30 | 0.036811901 | 11/8/2013 7:50  | 0 |
| 11/25/2013 10:45 | 0.036811901 | 11/8/2013 8:00  | 0 |
| 11/25/2013 11:00 | 0.036811901 | 11/8/2013 8:10  | 0 |
| 11/25/2013 11:15 | 0.036811901 | 11/8/2013 8:20  | 0 |
| 11/25/2013 11:30 | 0.036811901 | 11/8/2013 8:30  | 0 |
| 11/25/2013 11:45 | 0.036811901 | 11/8/2013 8:40  | 0 |
| 11/25/2013 12:00 | 0.036811901 | 11/8/2013 8:50  | 0 |
| 11/25/2013 12:15 | 0.036811901 | 11/8/2013 9:00  | 0 |
| 11/25/2013 12:30 | 0.036811901 | 11/8/2013 9:10  | 0 |
| 11/25/2013 12:45 | 0.036811901 | 11/8/2013 9:20  | 0 |
| 11/25/2013 13:00 | 0.036811901 | 11/8/2013 9:30  | 0 |
| 11/25/2013 13:15 | 0.036811901 | 11/8/2013 9:40  | 0 |
| 11/25/2013 13:30 | 0.036811901 | 11/8/2013 9:50  | 0 |
| 11/25/2013 13:45 | 0.036811901 | 11/8/2013 10:00 | 0 |
| 11/25/2013 14:00 | 0.036811901 | 11/8/2013 10:10 | 0 |
| 11/25/2013 14:15 | 0.036811901 | 11/8/2013 10:20 | 0 |
| 11/25/2013 14:30 | 0.036811901 | 11/8/2013 10:30 | 0 |
| 11/25/2013 14:45 | 0.036811901 | 11/8/2013 10:40 | 0 |
| 11/25/2013 15:00 | 0.036811901 | 11/8/2013 10:50 | 0 |
| 11/25/2013 15:15 | 0.036811901 | 11/8/2013 11:00 | 0 |
| 11/25/2013 15:30 | 0.036811901 | 11/8/2013 11:10 | 0 |
| 11/25/2013 15:45 | 0.036811901 | 11/8/2013 11:20 | 0 |
| 11/25/2013 16:00 | 0.036811901 | 11/8/2013 11:30 | 0 |
| 11/25/2013 16:15 | 0.036811901 | 11/8/2013 11:40 | 0 |
| 11/25/2013 16:30 | 0.036811901 | 11/8/2013 11:50 | 0 |
| 11/25/2013 16:45 | 0.036811901 | 11/8/2013 12:00 | 0 |
| 11/25/2013 17:00 | 0.039643585 | 11/8/2013 12:10 | 0 |
| 11/25/2013 17:15 | 0.039643585 | 11/8/2013 12:20 | 0 |
| 11/25/2013 17:30 | 0.039643585 | 11/8/2013 12:30 | 0 |
| 11/25/2013 17:45 | 0.04247527  | 11/8/2013 12:40 | 0 |
| 11/25/2013 18:00 | 0.04247527  | 11/8/2013 12:50 | 0 |
| 11/25/2013 18:15 | 0.039643585 | 11/8/2013 13:00 | 0 |
| 11/25/2013 18:30 | 0.039643585 | 11/8/2013 13:10 | 0 |
| 11/25/2013 18:45 | 0.039643585 | 11/8/2013 13:20 | 0 |
| 11/25/2013 19:00 | 0.039643585 | 11/8/2013 13:30 | 0 |
| 11/25/2013 19:15 | 0.039643585 | 11/8/2013 13:40 | 0 |

|                  |             |                 |   |
|------------------|-------------|-----------------|---|
| 11/25/2013 19:30 | 0.039643585 | 11/8/2013 13:50 | 0 |
| 11/25/2013 19:45 | 0.039643585 | 11/8/2013 14:00 | 0 |
| 11/25/2013 20:00 | 0.039643585 | 11/8/2013 14:10 | 0 |
| 11/25/2013 20:15 | 0.036811901 | 11/8/2013 14:20 | 0 |
| 11/25/2013 20:30 | 0.039643585 | 11/8/2013 14:30 | 0 |
| 11/25/2013 20:45 | 0.039643585 | 11/8/2013 14:40 | 0 |
| 11/25/2013 21:00 | 0.036811901 | 11/8/2013 14:50 | 0 |
| 11/25/2013 21:15 | 0.039643585 | 11/8/2013 15:00 | 0 |
| 11/25/2013 21:30 | 0.036811901 | 11/8/2013 15:10 | 0 |
| 11/25/2013 21:45 | 0.039643585 | 11/8/2013 15:20 | 0 |
| 11/25/2013 22:00 | 0.039643585 | 11/8/2013 15:30 | 0 |
| 11/25/2013 22:15 | 0.039643585 | 11/8/2013 15:40 | 0 |
| 11/25/2013 22:30 | 0.039643585 | 11/8/2013 15:50 | 0 |
| 11/25/2013 22:45 | 0.039643585 | 11/8/2013 16:00 | 0 |
| 11/25/2013 23:00 | 0.039643585 | 11/8/2013 16:10 | 0 |
| 11/25/2013 23:15 | 0.039643585 | 11/8/2013 16:20 | 0 |
| 11/25/2013 23:30 | 0.039643585 | 11/8/2013 16:30 | 0 |
| 11/25/2013 23:45 | 0.039643585 | 11/8/2013 16:40 | 0 |
| 11/26/2013 0:00  | 0.039643585 | 11/8/2013 16:50 | 0 |
| 11/26/2013 0:15  | 0.039643585 | 11/8/2013 17:00 | 0 |
| 11/26/2013 0:30  | 0.039643585 | 11/8/2013 17:10 | 0 |
| 11/26/2013 0:45  | 0.039643585 | 11/8/2013 17:20 | 0 |
| 11/26/2013 1:00  | 0.039643585 | 11/8/2013 17:30 | 0 |
| 11/26/2013 1:15  | 0.039643585 | 11/8/2013 17:40 | 0 |
| 11/26/2013 1:30  | 0.039643585 | 11/8/2013 17:50 | 0 |
| 11/26/2013 1:45  | 0.039643585 | 11/8/2013 18:00 | 0 |
| 11/26/2013 2:00  | 0.039643585 | 11/8/2013 18:10 | 0 |
| 11/26/2013 2:15  | 0.039643585 | 11/8/2013 18:20 | 0 |
| 11/26/2013 2:30  | 0.039643585 | 11/8/2013 18:30 | 0 |
| 11/26/2013 2:45  | 0.039643585 | 11/8/2013 18:40 | 0 |
| 11/26/2013 3:00  | 0.039643585 | 11/8/2013 18:50 | 0 |
| 11/26/2013 3:15  | 0.039643585 | 11/8/2013 19:00 | 0 |
| 11/26/2013 3:30  | 0.039643585 | 11/8/2013 19:10 | 0 |
| 11/26/2013 3:45  | 0.039643585 | 11/8/2013 19:20 | 0 |
| 11/26/2013 4:00  | 0.036811901 | 11/8/2013 19:30 | 0 |
| 11/26/2013 4:15  | 0.039643585 | 11/8/2013 19:40 | 0 |
| 11/26/2013 4:30  | 0.039643585 | 11/8/2013 19:50 | 0 |
| 11/26/2013 4:45  | 0.039643585 | 11/8/2013 20:00 | 0 |
| 11/26/2013 5:00  | 0.036811901 | 11/8/2013 20:10 | 0 |
| 11/26/2013 5:15  | 0.039643585 | 11/8/2013 20:20 | 0 |
| 11/26/2013 5:30  | 0.039643585 | 11/8/2013 20:30 | 0 |
| 11/26/2013 5:45  | 0.039643585 | 11/8/2013 20:40 | 0 |
| 11/26/2013 6:00  | 0.036811901 | 11/8/2013 20:50 | 0 |
| 11/26/2013 6:15  | 0.039643585 | 11/8/2013 21:00 | 0 |
| 11/26/2013 6:30  | 0.039643585 | 11/8/2013 21:10 | 0 |
| 11/26/2013 6:45  | 0.036811901 | 11/8/2013 21:20 | 0 |
| 11/26/2013 7:00  | 0.039643585 | 11/8/2013 21:30 | 0 |

|                  |             |                 |   |
|------------------|-------------|-----------------|---|
| 11/26/2013 7:15  | 0.036811901 | 11/8/2013 21:40 | 0 |
| 11/26/2013 7:30  | 0.039643585 | 11/8/2013 21:50 | 0 |
| 11/26/2013 7:45  | 0.036811901 | 11/8/2013 22:00 | 0 |
| 11/26/2013 8:00  | 0.036811901 | 11/8/2013 22:10 | 0 |
| 11/26/2013 8:15  | 0.036811901 | 11/8/2013 22:20 | 0 |
| 11/26/2013 8:30  | 0.036811901 | 11/8/2013 22:30 | 0 |
| 11/26/2013 8:45  | 0.036811901 | 11/8/2013 22:40 | 0 |
| 11/26/2013 9:00  | 0.036811901 | 11/8/2013 22:50 | 0 |
| 11/26/2013 9:15  | 0.039643585 | 11/8/2013 23:00 | 0 |
| 11/26/2013 9:30  | 0.036811901 | 11/8/2013 23:10 | 0 |
| 11/26/2013 9:45  | 0.036811901 | 11/8/2013 23:20 | 0 |
| 11/26/2013 10:00 | 0.036811901 | 11/8/2013 23:30 | 0 |
| 11/26/2013 10:15 | 0.036811901 | 11/8/2013 23:40 | 0 |
| 11/26/2013 10:30 | 0.036811901 | 11/8/2013 23:50 | 0 |
| 11/26/2013 10:45 | 0.039643585 | 11/9/2013 0:00  | 0 |
| 11/26/2013 11:00 | 0.036811901 | 11/9/2013 0:10  | 0 |
| 11/26/2013 11:15 | 0.036811901 | 11/9/2013 0:20  | 0 |
| 11/26/2013 11:30 | 0.039643585 | 11/9/2013 0:30  | 0 |
| 11/26/2013 11:45 | 0.039643585 | 11/9/2013 0:40  | 0 |
| 11/26/2013 12:00 | 0.039643585 | 11/9/2013 0:50  | 0 |
| 11/26/2013 12:15 | 0.036811901 | 11/9/2013 1:00  | 0 |
| 11/26/2013 12:30 | 0.036811901 | 11/9/2013 1:10  | 0 |
| 11/26/2013 12:45 | 0.036811901 | 11/9/2013 1:20  | 0 |
| 11/26/2013 13:00 | 0.036811901 | 11/9/2013 1:30  | 0 |
| 11/26/2013 13:15 | 0.036811901 | 11/9/2013 1:40  | 0 |
| 11/26/2013 13:30 | 0.036811901 | 11/9/2013 1:50  | 0 |
| 11/26/2013 13:45 | 0.036811901 | 11/9/2013 2:00  | 0 |
| 11/26/2013 14:00 | 0.036811901 | 11/9/2013 2:10  | 0 |
| 11/26/2013 14:15 | 0.036811901 | 11/9/2013 2:20  | 0 |
| 11/26/2013 14:30 | 0.036811901 | 11/9/2013 2:30  | 0 |
| 11/26/2013 14:45 | 0.036811901 | 11/9/2013 2:40  | 0 |
| 11/26/2013 15:00 | 0.036811901 | 11/9/2013 2:50  | 0 |
| 11/26/2013 15:15 | 0.036811901 | 11/9/2013 3:00  | 0 |
| 11/26/2013 15:30 | 0.036811901 | 11/9/2013 3:10  | 0 |
| 11/26/2013 15:45 | 0.036811901 | 11/9/2013 3:20  | 0 |
| 11/26/2013 16:00 | 0.036811901 | 11/9/2013 3:30  | 0 |
| 11/26/2013 16:15 | 0.036811901 | 11/9/2013 3:40  | 0 |
| 11/26/2013 16:30 | 0.036811901 | 11/9/2013 3:50  | 0 |
| 11/26/2013 16:45 | 0.036811901 | 11/9/2013 4:00  | 0 |
| 11/26/2013 17:00 | 0.036811901 | 11/9/2013 4:10  | 0 |
| 11/26/2013 17:15 | 0.036811901 | 11/9/2013 4:20  | 0 |
| 11/26/2013 17:30 | 0.036811901 | 11/9/2013 4:30  | 0 |
| 11/26/2013 17:45 | 0.036811901 | 11/9/2013 4:40  | 0 |
| 11/26/2013 18:00 | 0.036811901 | 11/9/2013 4:50  | 0 |
| 11/26/2013 18:15 | 0.036811901 | 11/9/2013 5:00  | 0 |
| 11/26/2013 18:30 | 0.036811901 | 11/9/2013 5:10  | 0 |
| 11/26/2013 18:45 | 0.036811901 | 11/9/2013 5:20  | 0 |

|                  |             |                 |   |
|------------------|-------------|-----------------|---|
| 11/26/2013 19:00 | 0.036811901 | 11/9/2013 5:30  | 0 |
| 11/26/2013 19:15 | 0.036811901 | 11/9/2013 5:40  | 0 |
| 11/26/2013 19:30 | 0.036811901 | 11/9/2013 5:50  | 0 |
| 11/26/2013 19:45 | 0.036811901 | 11/9/2013 6:00  | 0 |
| 11/26/2013 20:00 | 0.036811901 | 11/9/2013 6:10  | 0 |
| 11/26/2013 20:15 | 0.036811901 | 11/9/2013 6:20  | 0 |
| 11/26/2013 20:30 | 0.036811901 | 11/9/2013 6:30  | 0 |
| 11/26/2013 20:45 | 0.036811901 | 11/9/2013 6:40  | 0 |
| 11/26/2013 21:00 | 0.036811901 | 11/9/2013 6:50  | 0 |
| 11/26/2013 21:15 | 0.036811901 | 11/9/2013 7:00  | 0 |
| 11/26/2013 21:30 | 0.031148531 | 11/9/2013 7:10  | 0 |
| 11/26/2013 21:45 | 0.036811901 | 11/9/2013 7:20  | 0 |
| 11/26/2013 22:00 | 0.036811901 | 11/9/2013 7:30  | 0 |
| 11/26/2013 22:15 | 0.033980216 | 11/9/2013 7:40  | 0 |
| 11/26/2013 22:30 | 0.036811901 | 11/9/2013 7:50  | 0 |
| 11/26/2013 22:45 | 0.036811901 | 11/9/2013 8:00  | 0 |
| 11/26/2013 23:00 | 0.036811901 | 11/9/2013 8:10  | 0 |
| 11/26/2013 23:15 | 0.036811901 | 11/9/2013 8:20  | 0 |
| 11/26/2013 23:30 | 0.036811901 | 11/9/2013 8:30  | 0 |
| 11/26/2013 23:45 | 0.036811901 | 11/9/2013 8:40  | 0 |
| 11/27/2013 0:00  | 0.036811901 | 11/9/2013 8:50  | 0 |
| 11/27/2013 0:15  | 0.036811901 | 11/9/2013 9:00  | 0 |
| 11/27/2013 0:30  | 0.036811901 | 11/9/2013 9:10  | 0 |
| 11/27/2013 0:45  | 0.033980216 | 11/9/2013 9:20  | 0 |
| 11/27/2013 1:00  | 0.036811901 | 11/9/2013 9:30  | 0 |
| 11/27/2013 1:15  | 0.036811901 | 11/9/2013 9:40  | 0 |
| 11/27/2013 1:30  | 0.036811901 | 11/9/2013 9:50  | 0 |
| 11/27/2013 1:45  | 0.036811901 | 11/9/2013 10:00 | 0 |
| 11/27/2013 2:00  | 0.036811901 | 11/9/2013 10:10 | 0 |
| 11/27/2013 2:15  | 0.036811901 | 11/9/2013 10:20 | 0 |
| 11/27/2013 2:30  | 0.039643585 | 11/9/2013 10:30 | 0 |
| 11/27/2013 2:45  | 0.031148531 | 11/9/2013 10:40 | 0 |
| 11/27/2013 3:00  | 0.033980216 | 11/9/2013 10:50 | 0 |
| 11/27/2013 3:15  | 0.036811901 | 11/9/2013 11:00 | 0 |
| 11/27/2013 3:30  | 0.031148531 | 11/9/2013 11:10 | 0 |
| 11/27/2013 3:45  | 0.031148531 | 11/9/2013 11:20 | 0 |
| 11/27/2013 4:00  | 0.036811901 | 11/9/2013 11:30 | 0 |
| 11/27/2013 4:15  | 0.036811901 | 11/9/2013 11:40 | 0 |
| 11/27/2013 4:30  | 0.036811901 | 11/9/2013 11:50 | 0 |
| 11/27/2013 4:45  | 0.036811901 | 11/9/2013 12:00 | 0 |
| 11/27/2013 5:00  | 0.036811901 | 11/9/2013 12:10 | 0 |
| 11/27/2013 5:15  | 0.036811901 | 11/9/2013 12:20 | 0 |
| 11/27/2013 5:30  | 0.036811901 | 11/9/2013 12:30 | 0 |
| 11/27/2013 5:45  | 0.036811901 | 11/9/2013 12:40 | 0 |
| 11/27/2013 6:00  | 0.036811901 | 11/9/2013 12:50 | 0 |
| 11/27/2013 6:15  | 0.031148531 | 11/9/2013 13:00 | 0 |
| 11/27/2013 6:30  | 0.031148531 | 11/9/2013 13:10 | 0 |

|                  |             |                 |   |
|------------------|-------------|-----------------|---|
| 11/27/2013 6:45  | 0.031148531 | 11/9/2013 13:20 | 0 |
| 11/27/2013 7:00  | 0.031148531 | 11/9/2013 13:30 | 0 |
| 11/27/2013 7:15  | 0.031148531 | 11/9/2013 13:40 | 0 |
| 11/27/2013 7:30  | 0.031148531 | 11/9/2013 13:50 | 0 |
| 11/27/2013 7:45  | 0.031148531 | 11/9/2013 14:00 | 0 |
| 11/27/2013 8:00  | 0.031148531 | 11/9/2013 14:10 | 0 |
| 11/27/2013 8:15  | 0.031148531 | 11/9/2013 14:20 | 0 |
| 11/27/2013 8:30  | 0.033980216 | 11/9/2013 14:30 | 0 |
| 11/27/2013 8:45  | 0.033980216 | 11/9/2013 14:40 | 0 |
| 11/27/2013 9:00  | 0.033980216 | 11/9/2013 14:50 | 0 |
| 11/27/2013 9:15  | 0.033980216 | 11/9/2013 15:00 | 0 |
| 11/27/2013 9:30  | 0.033980216 | 11/9/2013 15:10 | 0 |
| 11/27/2013 9:45  | 0.033980216 | 11/9/2013 15:20 | 0 |
| 11/27/2013 10:00 | 0.033980216 | 11/9/2013 15:30 | 0 |
| 11/27/2013 10:15 | 0.033980216 | 11/9/2013 15:40 | 0 |
| 11/27/2013 10:30 | 0.033980216 | 11/9/2013 15:50 | 0 |
| 11/27/2013 10:45 | 0.033980216 | 11/9/2013 16:00 | 0 |
| 11/27/2013 11:00 | 0.033980216 | 11/9/2013 16:10 | 0 |
| 11/27/2013 11:15 | 0.033980216 | 11/9/2013 16:20 | 0 |
| 11/27/2013 11:30 | 0.036811901 | 11/9/2013 16:30 | 0 |
| 11/27/2013 11:45 | 0.033980216 | 11/9/2013 16:40 | 0 |
| 11/27/2013 12:00 | 0.033980216 | 11/9/2013 16:50 | 0 |
| 11/27/2013 12:15 | 0.031148531 | 11/9/2013 17:00 | 0 |
| 11/27/2013 12:30 | 0.036811901 | 11/9/2013 17:10 | 0 |
| 11/27/2013 12:45 | 0.036811901 | 11/9/2013 17:20 | 0 |
| 11/27/2013 13:00 | 0.036811901 | 11/9/2013 17:30 | 0 |
| 11/27/2013 13:15 | 0.036811901 | 11/9/2013 17:40 | 0 |
| 11/27/2013 13:30 | 0.036811901 | 11/9/2013 17:50 | 0 |
| 11/27/2013 13:45 | 0.036811901 | 11/9/2013 18:00 | 0 |
| 11/27/2013 14:00 | 0.036811901 | 11/9/2013 18:10 | 0 |
| 11/27/2013 14:15 | 0.036811901 | 11/9/2013 18:20 | 0 |
| 11/27/2013 14:30 | 0.036811901 | 11/9/2013 18:30 | 0 |
| 11/27/2013 14:45 | 0.036811901 | 11/9/2013 18:40 | 0 |
| 11/27/2013 15:00 | 0.036811901 | 11/9/2013 18:50 | 0 |
| 11/27/2013 15:15 | 0.036811901 | 11/9/2013 19:00 | 0 |
| 11/27/2013 15:30 | 0.036811901 | 11/9/2013 19:10 | 0 |
| 11/27/2013 15:45 | 0.036811901 | 11/9/2013 19:20 | 0 |
| 11/27/2013 16:00 | 0.036811901 | 11/9/2013 19:30 | 0 |
| 11/27/2013 16:15 | 0.036811901 | 11/9/2013 19:40 | 0 |
| 11/27/2013 16:30 | 0.033980216 | 11/9/2013 19:50 | 0 |
| 11/27/2013 16:45 | 0.036811901 | 11/9/2013 20:00 | 0 |
| 11/27/2013 17:15 | 0.033980216 | 11/9/2013 20:10 | 0 |
| 11/27/2013 17:30 | 0.033980216 | 11/9/2013 20:20 | 0 |
| 11/27/2013 17:45 | 0.031148531 | 11/9/2013 20:30 | 0 |
| 11/27/2013 18:00 | 0.031148531 | 11/9/2013 20:40 | 0 |
| 11/27/2013 18:15 | 0.033980216 | 11/9/2013 20:50 | 0 |
| 11/27/2013 18:30 | 0.033980216 | 11/9/2013 21:00 | 0 |

|                  |             |                 |   |
|------------------|-------------|-----------------|---|
| 11/27/2013 18:45 | 0.033980216 | 11/9/2013 21:10 | 0 |
| 11/27/2013 19:00 | 0.033980216 | 11/9/2013 21:20 | 0 |
| 11/27/2013 19:15 | 0.033980216 | 11/9/2013 21:30 | 0 |
| 11/27/2013 19:30 | 0.033980216 | 11/9/2013 21:40 | 0 |
| 11/27/2013 19:45 | 0.033980216 | 11/9/2013 21:50 | 0 |
| 11/27/2013 20:00 | 0.033980216 | 11/9/2013 22:00 | 0 |
| 11/27/2013 20:15 | 0.033980216 | 11/9/2013 22:10 | 0 |
| 11/27/2013 20:30 | 0.033980216 | 11/9/2013 22:20 | 0 |
| 11/27/2013 20:45 | 0.033980216 | 11/9/2013 22:30 | 0 |
| 11/27/2013 21:00 | 0.033980216 | 11/9/2013 22:50 | 0 |
| 11/27/2013 21:15 | 0.033980216 | 11/9/2013 23:00 | 0 |
| 11/27/2013 21:30 | 0.033980216 | 11/9/2013 23:10 | 0 |
| 11/27/2013 21:45 | 0.033980216 | 11/9/2013 23:20 | 0 |
| 11/27/2013 22:00 | 0.033980216 | 11/9/2013 23:30 | 0 |
| 11/27/2013 22:15 | 0.033980216 | 11/9/2013 23:40 | 0 |
| 11/27/2013 22:30 | 0.033980216 | 11/9/2013 23:50 | 0 |
| 11/27/2013 22:45 | 0.033980216 | 11/10/2013 0:00 | 0 |
| 11/27/2013 23:00 | 0.033980216 | 11/10/2013 0:10 | 0 |
| 11/27/2013 23:15 | 0.033980216 | 11/10/2013 0:20 | 0 |
| 11/27/2013 23:30 | 0.033980216 | 11/10/2013 0:30 | 0 |
| 11/27/2013 23:45 | 0.033980216 | 11/10/2013 0:40 | 0 |
| 11/28/2013 0:00  | 0.033980216 | 11/10/2013 0:50 | 0 |
| 11/28/2013 0:15  | 0.033980216 | 11/10/2013 1:00 | 0 |
| 11/28/2013 0:30  | 0.033980216 | 11/10/2013 1:10 | 0 |
| 11/28/2013 0:45  | 0.033980216 | 11/10/2013 1:20 | 0 |
| 11/28/2013 1:00  | 0.033980216 | 11/10/2013 1:30 | 0 |
| 11/28/2013 1:15  | 0.033980216 | 11/10/2013 1:40 | 0 |
| 11/28/2013 1:30  | 0.033980216 | 11/10/2013 1:50 | 0 |
| 11/28/2013 1:45  | 0.033980216 | 11/10/2013 2:00 | 0 |
| 11/28/2013 2:00  | 0.033980216 | 11/10/2013 2:10 | 0 |
| 11/28/2013 2:15  | 0.033980216 | 11/10/2013 2:20 | 0 |
| 11/28/2013 2:30  | 0.033980216 | 11/10/2013 2:30 | 0 |
| 11/28/2013 2:45  | 0.033980216 | 11/10/2013 2:40 | 0 |
| 11/28/2013 3:00  | 0.033980216 | 11/10/2013 2:50 | 0 |
| 11/28/2013 3:15  | 0.033980216 | 11/10/2013 3:00 | 0 |
| 11/28/2013 3:30  | 0.033980216 | 11/10/2013 3:10 | 0 |
| 11/28/2013 3:45  | 0.033980216 | 11/10/2013 3:20 | 0 |
| 11/28/2013 4:00  | 0.033980216 | 11/10/2013 3:30 | 0 |
| 11/28/2013 4:15  | 0.033980216 | 11/10/2013 3:40 | 0 |
| 11/28/2013 4:30  | 0.033980216 | 11/10/2013 3:50 | 0 |
| 11/28/2013 4:45  | 0.033980216 | 11/10/2013 4:00 | 0 |
| 11/28/2013 5:00  | 0.033980216 | 11/10/2013 4:10 | 0 |
| 11/28/2013 5:15  | 0.033980216 | 11/10/2013 4:20 | 0 |
| 11/28/2013 5:30  | 0.033980216 | 11/10/2013 4:30 | 0 |
| 11/28/2013 5:45  | 0.033980216 | 11/10/2013 4:40 | 0 |
| 11/28/2013 6:00  | 0.033980216 | 11/10/2013 4:50 | 0 |
| 11/28/2013 6:15  | 0.033980216 | 11/10/2013 5:00 | 0 |

|                  |             |                  |   |
|------------------|-------------|------------------|---|
| 11/28/2013 6:30  | 0.033980216 | 11/10/2013 5:10  | 0 |
| 11/28/2013 6:45  | 0.036811901 | 11/10/2013 5:20  | 0 |
| 11/28/2013 7:00  | 0.033980216 | 11/10/2013 5:30  | 0 |
| 11/28/2013 7:15  | 0.033980216 | 11/10/2013 5:40  | 0 |
| 11/28/2013 7:30  | 0.036811901 | 11/10/2013 5:50  | 0 |
| 11/28/2013 7:45  | 0.033980216 | 11/10/2013 6:00  | 0 |
| 11/28/2013 8:00  | 0.036811901 | 11/10/2013 6:10  | 0 |
| 11/28/2013 8:15  | 0.036811901 | 11/10/2013 6:20  | 0 |
| 11/28/2013 8:30  | 0.036811901 | 11/10/2013 6:30  | 0 |
| 11/28/2013 8:45  | 0.036811901 | 11/10/2013 6:40  | 0 |
| 11/28/2013 9:00  | 0.036811901 | 11/10/2013 6:50  | 0 |
| 11/28/2013 9:15  | 0.036811901 | 11/10/2013 7:00  | 0 |
| 11/28/2013 9:30  | 0.036811901 | 11/10/2013 7:10  | 0 |
| 11/28/2013 9:45  | 0.036811901 | 11/10/2013 7:20  | 0 |
| 11/28/2013 10:00 | 0.036811901 | 11/10/2013 7:30  | 0 |
| 11/28/2013 10:15 | 0.036811901 | 11/10/2013 7:40  | 0 |
| 11/28/2013 10:30 | 0.036811901 | 11/10/2013 7:50  | 0 |
| 11/28/2013 10:45 | 0.036811901 | 11/10/2013 8:00  | 0 |
| 11/28/2013 11:00 | 0.036811901 | 11/10/2013 8:10  | 0 |
| 11/28/2013 11:15 | 0.036811901 | 11/10/2013 8:20  | 0 |
| 11/28/2013 11:30 | 0.036811901 | 11/10/2013 8:30  | 0 |
| 11/28/2013 11:45 | 0.036811901 | 11/10/2013 8:40  | 0 |
| 11/28/2013 12:00 | 0.036811901 | 11/10/2013 8:50  | 0 |
| 11/28/2013 12:15 | 0.033980216 | 11/10/2013 9:00  | 0 |
| 11/28/2013 12:30 | 0.036811901 | 11/10/2013 9:10  | 0 |
| 11/28/2013 12:45 | 0.033980216 | 11/10/2013 9:20  | 0 |
| 11/28/2013 13:00 | 0.033980216 | 11/10/2013 9:30  | 0 |
| 11/28/2013 13:15 | 0.033980216 | 11/10/2013 9:40  | 0 |
| 11/28/2013 13:30 | 0.036811901 | 11/10/2013 9:50  | 0 |
| 11/28/2013 13:45 | 0.033980216 | 11/10/2013 10:00 | 0 |
| 11/28/2013 14:00 | 0.033980216 | 11/10/2013 10:10 | 0 |
| 11/28/2013 14:15 | 0.033980216 | 11/10/2013 10:20 | 0 |
| 11/28/2013 14:30 | 0.033980216 | 11/10/2013 10:30 | 0 |
| 11/28/2013 14:45 | 0.033980216 | 11/10/2013 10:40 | 0 |
| 11/28/2013 15:00 | 0.033980216 | 11/10/2013 10:50 | 0 |
| 11/28/2013 15:15 | 0.033980216 | 11/10/2013 11:00 | 0 |
| 11/28/2013 15:30 | 0.033980216 | 11/10/2013 11:10 | 0 |
| 11/28/2013 15:45 | 0.033980216 | 11/10/2013 11:20 | 0 |
| 11/28/2013 16:00 | 0.033980216 | 11/10/2013 11:30 | 0 |
| 11/28/2013 16:15 | 0.033980216 | 11/10/2013 11:40 | 0 |
| 11/28/2013 16:30 | 0.033980216 | 11/10/2013 11:50 | 0 |
| 11/28/2013 16:45 | 0.033980216 | 11/10/2013 12:00 | 0 |
| 11/28/2013 17:00 | 0.036811901 | 11/10/2013 12:10 | 0 |
| 11/28/2013 17:15 | 0.036811901 | 11/10/2013 12:20 | 0 |
| 11/28/2013 17:30 | 0.036811901 | 11/10/2013 12:30 | 0 |
| 11/28/2013 17:45 | 0.036811901 | 11/10/2013 12:40 | 0 |
| 11/28/2013 18:00 | 0.036811901 | 11/10/2013 12:50 | 0 |



|                  |             |                  |   |
|------------------|-------------|------------------|---|
| 11/28/2013 18:15 | 0.036811901 | 11/10/2013 13:00 | 0 |
| 11/28/2013 18:30 | 0.036811901 | 11/10/2013 13:10 | 0 |
| 11/28/2013 18:45 | 0.036811901 | 11/10/2013 13:20 | 0 |
| 11/28/2013 19:00 | 0.033980216 | 11/10/2013 13:30 | 0 |
| 11/28/2013 19:15 | 0.031148531 | 11/10/2013 13:40 | 0 |
| 11/28/2013 19:30 | 0.033980216 | 11/10/2013 13:50 | 0 |
| 11/28/2013 19:45 | 0.031148531 | 11/10/2013 14:00 | 0 |
| 11/28/2013 20:00 | 0.031148531 | 11/10/2013 14:10 | 0 |
| 11/28/2013 20:15 | 0.033980216 | 11/10/2013 14:20 | 0 |
| 11/28/2013 20:30 | 0.033980216 | 11/10/2013 14:30 | 0 |
| 11/28/2013 20:45 | 0.033980216 | 11/10/2013 14:40 | 0 |
| 11/28/2013 21:00 | 0.033980216 | 11/10/2013 14:50 | 0 |
| 11/28/2013 21:15 | 0.033980216 | 11/10/2013 15:00 | 0 |
| 11/28/2013 21:30 | 0.033980216 | 11/10/2013 15:10 | 0 |
| 11/28/2013 21:45 | 0.033980216 | 11/10/2013 15:20 | 0 |
| 11/28/2013 22:00 | 0.033980216 | 11/10/2013 15:30 | 0 |
| 11/28/2013 22:15 | 0.031148531 | 11/10/2013 15:40 | 0 |
| 11/28/2013 22:30 | 0.033980216 | 11/10/2013 15:50 | 0 |
| 11/28/2013 22:45 | 0.033980216 | 11/10/2013 16:00 | 0 |
| 11/28/2013 23:00 | 0.033980216 | 11/10/2013 16:10 | 0 |
| 11/28/2013 23:15 | 0.033980216 | 11/10/2013 16:20 | 0 |
| 11/28/2013 23:30 | 0.033980216 | 11/10/2013 16:30 | 0 |
| 11/28/2013 23:45 | 0.033980216 | 11/10/2013 16:40 | 0 |
| 11/29/2013 0:00  | 0.033980216 | 11/10/2013 16:50 | 0 |
| 11/29/2013 0:15  | 0.033980216 | 11/10/2013 17:00 | 0 |
| 11/29/2013 0:30  | 0.033980216 | 11/10/2013 17:10 | 0 |
| 11/29/2013 0:45  | 0.033980216 | 11/10/2013 17:20 | 0 |
| 11/29/2013 1:00  | 0.033980216 | 11/10/2013 17:30 | 0 |
| 11/29/2013 1:15  | 0.033980216 | 11/10/2013 17:40 | 0 |
| 11/29/2013 1:30  | 0.033980216 | 11/10/2013 17:50 | 0 |
| 11/29/2013 1:45  | 0.033980216 | 11/10/2013 18:00 | 0 |
| 11/29/2013 2:00  | 0.033980216 | 11/10/2013 18:10 | 0 |
| 11/29/2013 2:15  | 0.036811901 | 11/10/2013 18:20 | 0 |
| 11/29/2013 2:30  | 0.033980216 | 11/10/2013 18:30 | 0 |
| 11/29/2013 2:45  | 0.033980216 | 11/10/2013 18:40 | 0 |
| 11/29/2013 3:00  | 0.033980216 | 11/10/2013 18:50 | 0 |
| 11/29/2013 3:30  | 0.036811901 | 11/10/2013 19:00 | 0 |
| 11/29/2013 3:45  | 0.036811901 | 11/10/2013 19:10 | 0 |
| 11/29/2013 4:00  | 0.036811901 | 11/10/2013 19:20 | 0 |
| 11/29/2013 4:15  | 0.036811901 | 11/10/2013 19:30 | 0 |
| 11/29/2013 4:30  | 0.036811901 | 11/10/2013 19:40 | 0 |
| 11/29/2013 4:45  | 0.036811901 | 11/10/2013 19:50 | 0 |
| 11/29/2013 5:00  | 0.036811901 | 11/10/2013 20:00 | 0 |
| 11/29/2013 5:15  | 0.036811901 | 11/10/2013 20:10 | 0 |
| 11/29/2013 5:30  | 0.036811901 | 11/10/2013 20:20 | 0 |
| 11/29/2013 5:45  | 0.036811901 | 11/10/2013 20:30 | 0 |
| 11/29/2013 6:00  | 0.036811901 | 11/10/2013 20:40 | 0 |

|                  |             |                  |   |
|------------------|-------------|------------------|---|
| 11/29/2013 6:15  | 0.036811901 | 11/10/2013 20:50 | 0 |
| 11/29/2013 6:30  | 0.036811901 | 11/10/2013 21:00 | 0 |
| 11/29/2013 6:45  | 0.036811901 | 11/10/2013 21:10 | 0 |
| 11/29/2013 7:00  | 0.036811901 | 11/10/2013 21:20 | 0 |
| 11/29/2013 7:15  | 0.036811901 | 11/10/2013 21:30 | 0 |
| 11/29/2013 7:30  | 0.039643585 | 11/10/2013 21:40 | 0 |
| 11/29/2013 7:45  | 0.036811901 | 11/10/2013 21:50 | 0 |
| 11/29/2013 8:00  | 0.039643585 | 11/10/2013 22:00 | 0 |
| 11/29/2013 8:15  | 0.039643585 | 11/10/2013 22:10 | 0 |
| 11/29/2013 8:30  | 0.039643585 | 11/10/2013 22:20 | 0 |
| 11/29/2013 8:45  | 0.039643585 | 11/10/2013 22:30 | 0 |
| 11/29/2013 9:00  | 0.039643585 | 11/10/2013 22:40 | 0 |
| 11/29/2013 9:15  | 0.039643585 | 11/10/2013 22:50 | 0 |
| 11/29/2013 9:30  | 0.039643585 | 11/10/2013 23:00 | 0 |
| 11/29/2013 9:45  | 0.039643585 | 11/10/2013 23:10 | 0 |
| 11/29/2013 10:00 | 0.04247527  | 11/10/2013 23:20 | 0 |
| 11/29/2013 10:15 | 0.04247527  | 11/10/2013 23:30 | 0 |
| 11/29/2013 10:30 | 0.04247527  | 11/10/2013 23:40 | 0 |
| 11/29/2013 10:45 | 0.04247527  | 11/10/2013 23:50 | 0 |
| 11/29/2013 11:00 | 0.039643585 | 11/11/2013 0:00  | 0 |
| 11/29/2013 11:15 | 0.04247527  | 11/11/2013 0:10  | 0 |
| 11/29/2013 11:30 | 0.04247527  | 11/11/2013 0:20  | 0 |
| 11/29/2013 11:45 | 0.039643585 | 11/11/2013 0:30  | 0 |
| 11/29/2013 12:00 | 0.039643585 | 11/11/2013 0:40  | 0 |
| 11/29/2013 12:15 | 0.039643585 | 11/11/2013 0:50  | 0 |
| 11/29/2013 12:30 | 0.039643585 | 11/11/2013 1:00  | 0 |
| 11/29/2013 12:45 | 0.039643585 | 11/11/2013 1:10  | 0 |
| 11/29/2013 13:00 | 0.039643585 | 11/11/2013 1:20  | 0 |
| 11/29/2013 13:15 | 0.039643585 | 11/11/2013 1:30  | 0 |
| 11/29/2013 13:30 | 0.031148531 | 11/11/2013 1:40  | 0 |
| 11/29/2013 13:45 | 0.033980216 | 11/11/2013 1:50  | 0 |
| 11/29/2013 14:00 | 0.033980216 | 11/11/2013 2:00  | 0 |
| 11/29/2013 14:15 | 0.033980216 | 11/11/2013 2:10  | 0 |
| 11/29/2013 14:30 | 0.033980216 | 11/11/2013 2:20  | 0 |
| 11/29/2013 14:45 | 0.033980216 | 11/11/2013 2:30  | 0 |
| 11/29/2013 15:00 | 0.033980216 | 11/11/2013 2:40  | 0 |
| 11/29/2013 15:15 | 0.033980216 | 11/11/2013 2:50  | 0 |
| 11/29/2013 15:30 | 0.033980216 | 11/11/2013 3:00  | 0 |
| 11/29/2013 15:45 | 0.033980216 | 11/11/2013 3:10  | 0 |
| 11/29/2013 16:00 | 0.033980216 | 11/11/2013 3:20  | 0 |
| 11/29/2013 16:15 | 0.033980216 | 11/11/2013 3:30  | 0 |
| 11/29/2013 16:30 | 0.028316847 | 11/11/2013 3:40  | 0 |
| 11/29/2013 16:45 | 0.031148531 | 11/11/2013 3:50  | 0 |
| 11/29/2013 17:00 | 0.028316847 | 11/11/2013 4:00  | 0 |
| 11/29/2013 17:15 | 0.033980216 | 11/11/2013 4:10  | 0 |
| 11/29/2013 17:30 | 0.033980216 | 11/11/2013 4:20  | 0 |
| 11/29/2013 17:45 | 0.033980216 | 11/11/2013 4:30  | 0 |

|                  |             |                  |   |
|------------------|-------------|------------------|---|
| 11/29/2013 18:00 | 0.031148531 | 11/11/2013 4:40  | 0 |
| 11/29/2013 18:15 | 0.028316847 | 11/11/2013 4:50  | 0 |
| 11/29/2013 18:30 | 0.033980216 | 11/11/2013 5:00  | 0 |
| 11/29/2013 18:45 | 0.028316847 | 11/11/2013 5:10  | 0 |
| 11/29/2013 19:00 | 0.031148531 | 11/11/2013 5:20  | 0 |
| 11/29/2013 19:15 | 0.031148531 | 11/11/2013 5:30  | 0 |
| 11/29/2013 19:30 | 0.028316847 | 11/11/2013 5:40  | 0 |
| 11/29/2013 19:45 | 0.033980216 | 11/11/2013 5:50  | 0 |
| 11/29/2013 20:00 | 0.031148531 | 11/11/2013 6:00  | 0 |
| 11/29/2013 20:15 | 0.031148531 | 11/11/2013 6:10  | 0 |
| 11/29/2013 20:30 | 0.033980216 | 11/11/2013 6:20  | 0 |
| 11/29/2013 20:45 | 0.031148531 | 11/11/2013 6:30  | 0 |
| 11/29/2013 21:00 | 0.033980216 | 11/11/2013 6:40  | 0 |
| 11/29/2013 21:15 | 0.031148531 | 11/11/2013 6:50  | 0 |
| 11/29/2013 21:30 | 0.028316847 | 11/11/2013 7:00  | 0 |
| 11/29/2013 21:45 | 0.031148531 | 11/11/2013 7:10  | 0 |
| 11/29/2013 22:00 | 0.031148531 | 11/11/2013 7:20  | 0 |
| 11/29/2013 22:15 | 0.031148531 | 11/11/2013 7:30  | 0 |
| 11/29/2013 22:30 | 0.033980216 | 11/11/2013 7:40  | 0 |
| 11/29/2013 22:45 | 0.033980216 | 11/11/2013 7:50  | 0 |
| 11/29/2013 23:00 | 0.033980216 | 11/11/2013 8:00  | 0 |
| 11/29/2013 23:15 | 0.033980216 | 11/11/2013 8:10  | 0 |
| 11/29/2013 23:30 | 0.033980216 | 11/11/2013 8:20  | 0 |
| 11/29/2013 23:45 | 0.033980216 | 11/11/2013 8:30  | 0 |
| 11/30/2013 0:00  | 0.033980216 | 11/11/2013 8:40  | 0 |
| 11/30/2013 0:15  | 0.033980216 | 11/11/2013 8:50  | 0 |
| 11/30/2013 0:30  | 0.033980216 | 11/11/2013 9:00  | 0 |
| 11/30/2013 0:45  | 0.033980216 | 11/11/2013 9:10  | 0 |
| 11/30/2013 1:00  | 0.033980216 | 11/11/2013 9:20  | 0 |
| 11/30/2013 1:15  | 0.033980216 | 11/11/2013 9:30  | 0 |
| 11/30/2013 1:30  | 0.033980216 | 11/11/2013 9:40  | 0 |
| 11/30/2013 1:45  | 0.033980216 | 11/11/2013 9:50  | 0 |
| 11/30/2013 2:00  | 0.033980216 | 11/11/2013 10:00 | 0 |
| 11/30/2013 2:15  | 0.033980216 | 11/11/2013 10:10 | 0 |
| 11/30/2013 2:30  | 0.033980216 | 11/11/2013 10:20 | 0 |
| 11/30/2013 2:45  | 0.033980216 | 11/11/2013 10:30 | 0 |
| 11/30/2013 3:00  | 0.033980216 | 11/11/2013 10:40 | 0 |
| 11/30/2013 3:15  | 0.033980216 | 11/11/2013 10:50 | 0 |
| 11/30/2013 3:30  | 0.033980216 | 11/11/2013 11:00 | 0 |
| 11/30/2013 3:45  | 0.033980216 | 11/11/2013 11:10 | 0 |
| 11/30/2013 4:00  | 0.033980216 | 11/11/2013 11:20 | 0 |
| 11/30/2013 4:15  | 0.036811901 | 11/11/2013 11:30 | 0 |
| 11/30/2013 4:30  | 0.033980216 | 11/11/2013 11:40 | 0 |
| 11/30/2013 4:45  | 0.033980216 | 11/11/2013 11:50 | 0 |
| 11/30/2013 5:00  | 0.033980216 | 11/11/2013 12:00 | 0 |
| 11/30/2013 5:15  | 0.033980216 | 11/11/2013 12:10 | 0 |
| 11/30/2013 5:30  | 0.036811901 | 11/11/2013 12:20 | 0 |

|                  |             |                  |   |
|------------------|-------------|------------------|---|
| 11/30/2013 5:45  | 0.036811901 | 11/11/2013 12:30 | 0 |
| 11/30/2013 6:00  | 0.033980216 | 11/11/2013 12:40 | 0 |
| 11/30/2013 6:15  | 0.033980216 | 11/11/2013 12:50 | 0 |
| 11/30/2013 6:30  | 0.033980216 | 11/11/2013 13:00 | 0 |
| 11/30/2013 6:45  | 0.036811901 | 11/11/2013 13:10 | 0 |
| 11/30/2013 7:00  | 0.033980216 | 11/11/2013 13:20 | 0 |
| 11/30/2013 7:15  | 0.036811901 | 11/11/2013 13:30 | 0 |
| 11/30/2013 7:30  | 0.036811901 | 11/11/2013 13:40 | 0 |
| 11/30/2013 7:45  | 0.036811901 | 11/11/2013 13:50 | 0 |
| 11/30/2013 8:00  | 0.036811901 | 11/11/2013 14:00 | 0 |
| 11/30/2013 8:15  | 0.036811901 | 11/11/2013 14:10 | 0 |
| 11/30/2013 8:30  | 0.036811901 | 11/11/2013 14:20 | 0 |
| 11/30/2013 8:45  | 0.036811901 | 11/11/2013 14:30 | 0 |
| 11/30/2013 9:00  | 0.036811901 | 11/11/2013 14:40 | 0 |
| 11/30/2013 9:15  | 0.036811901 | 11/11/2013 14:50 | 0 |
| 11/30/2013 9:30  | 0.036811901 | 11/11/2013 15:00 | 0 |
| 11/30/2013 9:45  | 0.036811901 | 11/11/2013 15:10 | 0 |
| 11/30/2013 10:00 | 0.036811901 | 11/11/2013 15:20 | 0 |
| 11/30/2013 10:15 | 0.036811901 | 11/11/2013 15:30 | 0 |
| 11/30/2013 10:30 | 0.036811901 | 11/11/2013 15:40 | 0 |
| 11/30/2013 10:45 | 0.033980216 | 11/11/2013 15:50 | 0 |
| 11/30/2013 11:00 | 0.033980216 | 11/11/2013 16:00 | 0 |
| 11/30/2013 11:15 | 0.033980216 | 11/11/2013 16:10 | 0 |
| 11/30/2013 11:30 | 0.033980216 | 11/11/2013 16:20 | 0 |
| 11/30/2013 11:45 | 0.033980216 | 11/11/2013 16:30 | 0 |
| 11/30/2013 12:00 | 0.033980216 | 11/11/2013 16:40 | 0 |
| 11/30/2013 12:15 | 0.033980216 | 11/11/2013 16:50 | 0 |
| 11/30/2013 12:30 | 0.033980216 | 11/11/2013 17:00 | 0 |
| 11/30/2013 12:45 | 0.033980216 | 11/11/2013 17:10 | 0 |
| 11/30/2013 13:00 | 0.033980216 | 11/11/2013 17:20 | 0 |
| 11/30/2013 13:15 | 0.033980216 | 11/11/2013 17:30 | 0 |
| 11/30/2013 13:30 | 0.033980216 | 11/11/2013 17:40 | 0 |
| 11/30/2013 13:45 | 0.033980216 | 11/11/2013 17:50 | 0 |
| 11/30/2013 14:00 | 0.033980216 | 11/11/2013 18:00 | 0 |
| 11/30/2013 14:15 | 0.033980216 | 11/11/2013 18:10 | 0 |
| 11/30/2013 14:30 | 0.033980216 | 11/11/2013 18:20 | 0 |
| 11/30/2013 14:45 | 0.033980216 | 11/11/2013 18:30 | 0 |
| 11/30/2013 15:00 | 0.033980216 | 11/11/2013 18:40 | 0 |
| 11/30/2013 15:15 | 0.033980216 | 11/11/2013 18:50 | 0 |
| 11/30/2013 15:30 | 0.033980216 | 11/11/2013 19:00 | 0 |
| 11/30/2013 15:45 | 0.033980216 | 11/11/2013 19:10 | 0 |
| 11/30/2013 16:00 | 0.033980216 | 11/11/2013 19:20 | 0 |
| 11/30/2013 16:15 | 0.033980216 | 11/11/2013 19:30 | 0 |
| 11/30/2013 16:30 | 0.033980216 | 11/11/2013 19:40 | 0 |
| 11/30/2013 16:45 | 0.033980216 | 11/11/2013 19:50 | 0 |
| 11/30/2013 17:00 | 0.033980216 | 11/11/2013 20:00 | 0 |
| 11/30/2013 17:15 | 0.033980216 | 11/11/2013 20:10 | 0 |

|                  |             |                  |   |
|------------------|-------------|------------------|---|
| 11/30/2013 17:30 | 0.033980216 | 11/11/2013 20:20 | 0 |
| 11/30/2013 17:45 | 0.033980216 | 11/11/2013 20:30 | 0 |
| 11/30/2013 18:00 | 0.033980216 | 11/11/2013 20:40 | 0 |
| 11/30/2013 18:15 | 0.033980216 | 11/11/2013 20:50 | 0 |
| 11/30/2013 18:30 | 0.033980216 | 11/11/2013 21:00 | 0 |
| 11/30/2013 18:45 | 0.033980216 | 11/11/2013 21:10 | 0 |
| 11/30/2013 19:00 | 0.033980216 | 11/11/2013 21:20 | 0 |
| 11/30/2013 19:15 | 0.036811901 | 11/11/2013 21:30 | 0 |
| 11/30/2013 19:30 | 0.033980216 | 11/11/2013 21:40 | 0 |
| 11/30/2013 19:45 | 0.033980216 | 11/11/2013 21:50 | 0 |
| 11/30/2013 20:00 | 0.033980216 | 11/11/2013 22:00 | 0 |
| 11/30/2013 20:15 | 0.036811901 | 11/11/2013 22:10 | 0 |
| 11/30/2013 20:30 | 0.033980216 | 11/11/2013 22:20 | 0 |
| 11/30/2013 20:45 | 0.033980216 | 11/11/2013 22:30 | 0 |
| 11/30/2013 21:00 | 0.033980216 | 11/11/2013 22:40 | 0 |
| 11/30/2013 21:15 | 0.036811901 | 11/11/2013 22:50 | 0 |
| 11/30/2013 21:30 | 0.033980216 | 11/11/2013 23:00 | 0 |
| 11/30/2013 21:45 | 0.036811901 | 11/11/2013 23:10 | 0 |
| 11/30/2013 22:00 | 0.036811901 | 11/11/2013 23:20 | 0 |
| 11/30/2013 22:15 | 0.033980216 | 11/11/2013 23:30 | 0 |
| 11/30/2013 22:30 | 0.033980216 | 11/11/2013 23:40 | 0 |
| 11/30/2013 22:45 | 0.033980216 | 11/11/2013 23:50 | 0 |
| 11/30/2013 23:00 | 0.033980216 | 11/12/2013 0:00  | 0 |
| 11/30/2013 23:15 | 0.033980216 | 11/12/2013 0:10  | 0 |
| 11/30/2013 23:30 | 0.036811901 | 11/12/2013 0:20  | 0 |
| 11/30/2013 23:45 | 0.036811901 | 11/12/2013 0:30  | 0 |
| 12/1/2013 0:00   | 0.033980216 | 11/12/2013 0:40  | 0 |
|                  |             | 11/12/2013 0:50  | 0 |
|                  |             | 11/12/2013 1:00  | 0 |
|                  |             | 11/12/2013 1:10  | 0 |
|                  |             | 11/12/2013 1:20  | 0 |
|                  |             | 11/12/2013 1:30  | 0 |
|                  |             | 11/12/2013 1:40  | 0 |
|                  |             | 11/12/2013 1:50  | 0 |
|                  |             | 11/12/2013 2:00  | 0 |
|                  |             | 11/12/2013 2:10  | 0 |
|                  |             | 11/12/2013 2:20  | 0 |
|                  |             | 11/12/2013 2:30  | 0 |
|                  |             | 11/12/2013 2:40  | 0 |
|                  |             | 11/12/2013 2:50  | 0 |
|                  |             | 11/12/2013 3:00  | 0 |
|                  |             | 11/12/2013 3:10  | 0 |
|                  |             | 11/12/2013 3:20  | 0 |
|                  |             | 11/12/2013 3:30  | 0 |
|                  |             | 11/12/2013 3:40  | 0 |
|                  |             | 11/12/2013 3:50  | 0 |
|                  |             | 11/12/2013 4:00  | 0 |

|                  |   |
|------------------|---|
| 11/12/2013 4:10  | 0 |
| 11/12/2013 4:20  | 0 |
| 11/12/2013 4:30  | 0 |
| 11/12/2013 4:40  | 0 |
| 11/12/2013 4:50  | 0 |
| 11/12/2013 5:00  | 0 |
| 11/12/2013 5:10  | 0 |
| 11/12/2013 5:20  | 0 |
| 11/12/2013 5:30  | 0 |
| 11/12/2013 5:40  | 0 |
| 11/12/2013 5:50  | 0 |
| 11/12/2013 6:00  | 0 |
| 11/12/2013 6:10  | 0 |
| 11/12/2013 6:20  | 0 |
| 11/12/2013 6:30  | 0 |
| 11/12/2013 6:40  | 0 |
| 11/12/2013 6:50  | 0 |
| 11/12/2013 7:00  | 0 |
| 11/12/2013 7:10  | 0 |
| 11/12/2013 7:20  | 0 |
| 11/12/2013 7:30  | 0 |
| 11/12/2013 7:40  | 0 |
| 11/12/2013 7:50  | 0 |
| 11/12/2013 8:00  | 0 |
| 11/12/2013 8:10  | 0 |
| 11/12/2013 8:20  | 0 |
| 11/12/2013 8:30  | 0 |
| 11/12/2013 8:40  | 0 |
| 11/12/2013 8:50  | 0 |
| 11/12/2013 9:00  | 0 |
| 11/12/2013 9:10  | 0 |
| 11/12/2013 9:20  | 0 |
| 11/12/2013 9:30  | 0 |
| 11/12/2013 9:40  | 0 |
| 11/12/2013 9:50  | 0 |
| 11/12/2013 10:00 | 0 |
| 11/12/2013 10:10 | 0 |
| 11/12/2013 10:20 | 0 |
| 11/12/2013 10:30 | 0 |
| 11/12/2013 10:40 | 0 |
| 11/12/2013 10:50 | 0 |
| 11/12/2013 11:00 | 0 |
| 11/12/2013 11:10 | 0 |
| 11/12/2013 11:20 | 0 |
| 11/12/2013 11:30 | 0 |
| 11/12/2013 11:40 | 0 |
| 11/12/2013 11:50 | 0 |

|                  |   |
|------------------|---|
| 11/12/2013 12:00 | 0 |
| 11/12/2013 12:10 | 0 |
| 11/12/2013 12:20 | 0 |
| 11/12/2013 12:30 | 0 |
| 11/12/2013 12:40 | 0 |
| 11/12/2013 12:50 | 0 |
| 11/12/2013 13:00 | 0 |
| 11/12/2013 13:10 | 0 |
| 11/12/2013 13:20 | 0 |
| 11/12/2013 13:30 | 0 |
| 11/12/2013 13:40 | 0 |
| 11/12/2013 13:50 | 0 |
| 11/12/2013 14:00 | 0 |
| 11/12/2013 14:10 | 0 |
| 11/12/2013 14:20 | 0 |
| 11/12/2013 14:30 | 0 |
| 11/12/2013 14:40 | 0 |
| 11/12/2013 14:50 | 0 |
| 11/12/2013 15:00 | 0 |
| 11/12/2013 15:10 | 0 |
| 11/12/2013 15:20 | 0 |
| 11/12/2013 15:30 | 0 |
| 11/12/2013 15:40 | 0 |
| 11/12/2013 15:50 | 0 |
| 11/12/2013 16:00 | 0 |
| 11/12/2013 16:10 | 0 |
| 11/12/2013 16:20 | 0 |
| 11/12/2013 16:30 | 0 |
| 11/12/2013 16:40 | 0 |
| 11/12/2013 16:50 | 0 |
| 11/12/2013 17:00 | 0 |
| 11/12/2013 17:10 | 0 |
| 11/12/2013 17:20 | 0 |
| 11/12/2013 17:30 | 0 |
| 11/12/2013 17:40 | 0 |
| 11/12/2013 17:50 | 0 |
| 11/12/2013 18:00 | 0 |
| 11/12/2013 18:10 | 0 |
| 11/12/2013 18:20 | 0 |
| 11/12/2013 18:30 | 0 |
| 11/12/2013 18:40 | 0 |
| 11/12/2013 18:50 | 0 |
| 11/12/2013 19:00 | 0 |
| 11/12/2013 19:10 | 0 |
| 11/12/2013 19:20 | 0 |
| 11/12/2013 19:30 | 0 |
| 11/12/2013 19:40 | 0 |

|                  |   |
|------------------|---|
| 11/12/2013 19:50 | 0 |
| 11/12/2013 20:00 | 0 |
| 11/12/2013 20:10 | 0 |
| 11/12/2013 20:20 | 0 |
| 11/12/2013 20:30 | 0 |
| 11/12/2013 20:40 | 0 |
| 11/12/2013 20:50 | 0 |
| 11/12/2013 21:00 | 0 |
| 11/12/2013 21:10 | 0 |
| 11/12/2013 21:20 | 0 |
| 11/12/2013 21:30 | 0 |
| 11/12/2013 21:40 | 0 |
| 11/12/2013 21:50 | 0 |
| 11/12/2013 22:00 | 0 |
| 11/12/2013 22:10 | 0 |
| 11/12/2013 22:20 | 0 |
| 11/12/2013 22:40 | 0 |
| 11/12/2013 22:50 | 0 |
| 11/12/2013 23:00 | 0 |
| 11/12/2013 23:10 | 0 |
| 11/12/2013 23:20 | 0 |
| 11/12/2013 23:30 | 0 |
| 11/12/2013 23:40 | 0 |
| 11/12/2013 23:50 | 0 |
| 11/13/2013 0:00  | 0 |
| 11/13/2013 0:10  | 0 |
| 11/13/2013 0:20  | 0 |
| 11/13/2013 0:30  | 0 |
| 11/13/2013 0:40  | 0 |
| 11/13/2013 0:50  | 0 |
| 11/13/2013 1:00  | 0 |
| 11/13/2013 1:10  | 0 |
| 11/13/2013 1:20  | 0 |
| 11/13/2013 1:30  | 0 |
| 11/13/2013 1:40  | 0 |
| 11/13/2013 1:50  | 0 |
| 11/13/2013 2:00  | 0 |
| 11/13/2013 2:10  | 0 |
| 11/13/2013 2:20  | 0 |
| 11/13/2013 2:30  | 0 |
| 11/13/2013 2:40  | 0 |
| 11/13/2013 2:50  | 0 |
| 11/13/2013 3:00  | 0 |
| 11/13/2013 3:10  | 0 |
| 11/13/2013 3:20  | 0 |
| 11/13/2013 3:30  | 0 |
| 11/13/2013 3:40  | 0 |



|                  |   |
|------------------|---|
| 11/13/2013 3:50  | 0 |
| 11/13/2013 4:00  | 0 |
| 11/13/2013 4:10  | 0 |
| 11/13/2013 4:20  | 0 |
| 11/13/2013 4:30  | 0 |
| 11/13/2013 4:40  | 0 |
| 11/13/2013 4:50  | 0 |
| 11/13/2013 5:00  | 0 |
| 11/13/2013 5:10  | 0 |
| 11/13/2013 5:20  | 0 |
| 11/13/2013 5:30  | 0 |
| 11/13/2013 5:40  | 0 |
| 11/13/2013 5:50  | 0 |
| 11/13/2013 6:00  | 0 |
| 11/13/2013 6:10  | 0 |
| 11/13/2013 6:20  | 0 |
| 11/13/2013 6:30  | 0 |
| 11/13/2013 6:40  | 0 |
| 11/13/2013 6:50  | 0 |
| 11/13/2013 7:00  | 0 |
| 11/13/2013 7:10  | 0 |
| 11/13/2013 7:20  | 0 |
| 11/13/2013 7:30  | 0 |
| 11/13/2013 7:40  | 0 |
| 11/13/2013 7:50  | 0 |
| 11/13/2013 8:00  | 0 |
| 11/13/2013 8:10  | 0 |
| 11/13/2013 8:20  | 0 |
| 11/13/2013 8:30  | 0 |
| 11/13/2013 8:40  | 0 |
| 11/13/2013 8:50  | 0 |
| 11/13/2013 9:00  | 0 |
| 11/13/2013 9:20  | 0 |
| 11/13/2013 9:30  | 0 |
| 11/13/2013 9:40  | 0 |
| 11/13/2013 9:50  | 0 |
| 11/13/2013 10:00 | 0 |
| 11/13/2013 10:20 | 0 |
| 11/13/2013 10:30 | 0 |
| 11/13/2013 10:40 | 0 |
| 11/13/2013 11:10 | 0 |
| 11/13/2013 11:20 | 0 |
| 11/13/2013 11:50 | 0 |
| 11/13/2013 12:00 | 0 |
| 11/13/2013 12:10 | 0 |
| 11/13/2013 12:20 | 0 |
| 11/13/2013 12:30 | 0 |

|                  |   |
|------------------|---|
| 11/13/2013 12:40 | 0 |
| 11/13/2013 12:50 | 0 |
| 11/13/2013 13:00 | 0 |
| 11/13/2013 13:30 | 0 |
| 11/13/2013 13:40 | 0 |
| 11/13/2013 13:50 | 0 |
| 11/13/2013 14:00 | 0 |
| 11/13/2013 14:30 | 0 |
| 11/13/2013 14:40 | 0 |
| 11/13/2013 14:50 | 0 |
| 11/13/2013 15:00 | 0 |
| 11/13/2013 15:10 | 0 |
| 11/13/2013 15:20 | 0 |
| 11/13/2013 15:40 | 0 |
| 11/13/2013 15:50 | 0 |
| 11/13/2013 16:00 | 0 |
| 11/13/2013 16:10 | 0 |
| 11/13/2013 16:20 | 0 |
| 11/13/2013 16:30 | 0 |
| 11/13/2013 16:40 | 0 |
| 11/13/2013 16:50 | 0 |
| 11/13/2013 17:00 | 0 |
| 11/13/2013 17:10 | 0 |
| 11/13/2013 17:20 | 0 |
| 11/13/2013 17:30 | 0 |
| 11/13/2013 17:40 | 0 |
| 11/13/2013 17:50 | 0 |
| 11/13/2013 18:00 | 0 |
| 11/13/2013 18:20 | 0 |
| 11/13/2013 18:30 | 0 |
| 11/13/2013 18:40 | 0 |
| 11/13/2013 18:50 | 0 |
| 11/13/2013 19:00 | 0 |
| 11/13/2013 19:10 | 0 |
| 11/13/2013 19:20 | 0 |
| 11/13/2013 19:30 | 0 |
| 11/13/2013 19:40 | 0 |
| 11/13/2013 19:50 | 0 |
| 11/13/2013 20:00 | 0 |
| 11/13/2013 20:10 | 0 |
| 11/13/2013 20:20 | 0 |
| 11/13/2013 20:30 | 0 |
| 11/13/2013 20:40 | 0 |
| 11/13/2013 20:50 | 0 |
| 11/13/2013 21:00 | 0 |
| 11/13/2013 21:10 | 0 |
| 11/13/2013 21:20 | 0 |

|                  |   |
|------------------|---|
| 11/13/2013 21:30 | 0 |
| 11/13/2013 21:40 | 0 |
| 11/13/2013 21:50 | 0 |
| 11/13/2013 22:00 | 0 |
| 11/13/2013 22:10 | 0 |
| 11/13/2013 22:20 | 0 |
| 11/13/2013 22:30 | 0 |
| 11/13/2013 22:40 | 0 |
| 11/13/2013 22:50 | 0 |
| 11/13/2013 23:00 | 0 |
| 11/13/2013 23:10 | 0 |
| 11/13/2013 23:20 | 0 |
| 11/13/2013 23:30 | 0 |
| 11/13/2013 23:40 | 0 |
| 11/13/2013 23:50 | 0 |
| 11/14/2013 0:00  | 0 |
| 11/14/2013 0:10  | 0 |
| 11/14/2013 0:20  | 0 |
| 11/14/2013 0:30  | 0 |
| 11/14/2013 0:40  | 0 |
| 11/14/2013 0:50  | 0 |
| 11/14/2013 1:00  | 0 |
| 11/14/2013 1:10  | 0 |
| 11/14/2013 1:20  | 0 |
| 11/14/2013 1:30  | 0 |
| 11/14/2013 1:40  | 0 |
| 11/14/2013 1:50  | 0 |
| 11/14/2013 2:00  | 0 |
| 11/14/2013 2:10  | 0 |
| 11/14/2013 2:20  | 0 |
| 11/14/2013 2:30  | 0 |
| 11/14/2013 2:40  | 0 |
| 11/14/2013 2:50  | 0 |
| 11/14/2013 3:00  | 0 |
| 11/14/2013 3:10  | 0 |
| 11/14/2013 3:20  | 0 |
| 11/14/2013 3:30  | 0 |
| 11/14/2013 3:40  | 0 |
| 11/14/2013 3:50  | 0 |
| 11/14/2013 4:00  | 0 |
| 11/14/2013 4:10  | 0 |
| 11/14/2013 4:20  | 0 |
| 11/14/2013 4:30  | 0 |
| 11/14/2013 4:40  | 0 |
| 11/14/2013 4:50  | 0 |
| 11/14/2013 5:00  | 0 |
| 11/14/2013 5:10  | 0 |

|                  |   |
|------------------|---|
| 11/14/2013 5:20  | 0 |
| 11/14/2013 5:40  | 0 |
| 11/14/2013 5:50  | 0 |
| 11/14/2013 6:00  | 0 |
| 11/14/2013 6:10  | 0 |
| 11/14/2013 6:20  | 0 |
| 11/14/2013 6:30  | 0 |
| 11/14/2013 6:50  | 0 |
| 11/14/2013 7:00  | 0 |
| 11/14/2013 7:10  | 0 |
| 11/14/2013 7:20  | 0 |
| 11/14/2013 7:30  | 0 |
| 11/14/2013 7:40  | 0 |
| 11/14/2013 7:50  | 0 |
| 11/14/2013 8:00  | 0 |
| 11/14/2013 8:10  | 0 |
| 11/14/2013 8:20  | 0 |
| 11/14/2013 8:30  | 0 |
| 11/14/2013 8:40  | 0 |
| 11/14/2013 8:50  | 0 |
| 11/14/2013 9:00  | 0 |
| 11/14/2013 9:10  | 0 |
| 11/14/2013 9:20  | 0 |
| 11/14/2013 9:30  | 0 |
| 11/14/2013 9:40  | 0 |
| 11/14/2013 9:50  | 0 |
| 11/14/2013 10:00 | 0 |
| 11/14/2013 10:10 | 0 |
| 11/14/2013 10:20 | 0 |
| 11/14/2013 10:30 | 0 |
| 11/14/2013 10:40 | 0 |
| 11/14/2013 10:50 | 0 |
| 11/14/2013 11:00 | 0 |
| 11/14/2013 11:10 | 0 |
| 11/14/2013 11:20 | 0 |
| 11/14/2013 11:30 | 0 |
| 11/14/2013 11:40 | 0 |
| 11/14/2013 11:50 | 0 |
| 11/14/2013 12:00 | 0 |
| 11/14/2013 12:10 | 0 |
| 11/14/2013 12:20 | 0 |
| 11/14/2013 12:30 | 0 |
| 11/14/2013 12:40 | 0 |
| 11/14/2013 12:50 | 0 |
| 11/14/2013 13:00 | 0 |
| 11/14/2013 13:10 | 0 |
| 11/14/2013 13:20 | 0 |

|                  |   |
|------------------|---|
| 11/14/2013 13:30 | 0 |
| 11/14/2013 13:40 | 0 |
| 11/14/2013 13:50 | 0 |
| 11/14/2013 14:00 | 0 |
| 11/14/2013 14:10 | 0 |
| 11/14/2013 14:20 | 0 |
| 11/14/2013 14:30 | 0 |
| 11/14/2013 14:40 | 0 |
| 11/14/2013 14:50 | 0 |
| 11/14/2013 15:00 | 0 |
| 11/14/2013 15:10 | 0 |
| 11/14/2013 15:20 | 0 |
| 11/14/2013 15:30 | 0 |
| 11/14/2013 15:40 | 0 |
| 11/14/2013 15:50 | 0 |
| 11/14/2013 16:00 | 0 |
| 11/14/2013 16:10 | 0 |
| 11/14/2013 16:20 | 0 |
| 11/14/2013 16:30 | 0 |
| 11/14/2013 16:40 | 0 |
| 11/14/2013 16:50 | 0 |
| 11/14/2013 17:00 | 0 |
| 11/14/2013 17:10 | 0 |
| 11/14/2013 17:20 | 0 |
| 11/14/2013 17:30 | 0 |
| 11/14/2013 17:40 | 0 |
| 11/14/2013 17:50 | 0 |
| 11/14/2013 18:00 | 0 |
| 11/14/2013 18:10 | 0 |
| 11/14/2013 18:20 | 0 |
| 11/14/2013 18:30 | 0 |
| 11/14/2013 18:40 | 0 |
| 11/14/2013 18:50 | 0 |
| 11/14/2013 19:00 | 0 |
| 11/14/2013 19:10 | 0 |
| 11/14/2013 19:20 | 0 |
| 11/14/2013 19:30 | 0 |
| 11/14/2013 19:40 | 0 |
| 11/14/2013 19:50 | 0 |
| 11/14/2013 20:00 | 0 |
| 11/14/2013 20:10 | 0 |
| 11/14/2013 20:20 | 0 |
| 11/14/2013 20:30 | 0 |
| 11/14/2013 20:40 | 0 |
| 11/14/2013 20:50 | 0 |
| 11/14/2013 21:00 | 0 |
| 11/14/2013 21:10 | 0 |

|                  |   |
|------------------|---|
| 11/14/2013 21:20 | 0 |
| 11/14/2013 21:30 | 0 |
| 11/14/2013 21:40 | 0 |
| 11/14/2013 21:50 | 0 |
| 11/14/2013 22:00 | 0 |
| 11/14/2013 22:10 | 0 |
| 11/14/2013 22:20 | 0 |
| 11/14/2013 22:30 | 0 |
| 11/14/2013 22:40 | 0 |
| 11/14/2013 22:50 | 0 |
| 11/14/2013 23:00 | 0 |
| 11/14/2013 23:10 | 0 |
| 11/14/2013 23:20 | 0 |
| 11/14/2013 23:30 | 0 |
| 11/14/2013 23:40 | 0 |
| 11/14/2013 23:50 | 0 |
| 11/15/2013 0:00  | 0 |
| 11/15/2013 0:10  | 0 |
| 11/15/2013 0:20  | 0 |
| 11/15/2013 0:30  | 0 |
| 11/15/2013 0:40  | 0 |
| 11/15/2013 0:50  | 0 |
| 11/15/2013 1:00  | 0 |
| 11/15/2013 1:10  | 0 |
| 11/15/2013 1:20  | 0 |
| 11/15/2013 1:30  | 0 |
| 11/15/2013 1:40  | 0 |
| 11/15/2013 1:50  | 0 |
| 11/15/2013 2:00  | 0 |
| 11/15/2013 2:10  | 0 |
| 11/15/2013 2:20  | 0 |
| 11/15/2013 2:30  | 0 |
| 11/15/2013 2:40  | 0 |
| 11/15/2013 2:50  | 0 |
| 11/15/2013 3:00  | 0 |
| 11/15/2013 3:10  | 0 |
| 11/15/2013 3:20  | 0 |
| 11/15/2013 3:30  | 0 |
| 11/15/2013 3:40  | 0 |
| 11/15/2013 3:50  | 0 |
| 11/15/2013 4:00  | 0 |
| 11/15/2013 4:10  | 0 |
| 11/15/2013 4:20  | 0 |
| 11/15/2013 4:30  | 0 |
| 11/15/2013 4:40  | 0 |
| 11/15/2013 4:50  | 0 |
| 11/15/2013 5:00  | 0 |

|                  |   |
|------------------|---|
| 11/15/2013 5:10  | 0 |
| 11/15/2013 5:20  | 0 |
| 11/15/2013 5:30  | 0 |
| 11/15/2013 5:40  | 0 |
| 11/15/2013 5:50  | 0 |
| 11/15/2013 6:00  | 0 |
| 11/15/2013 6:10  | 0 |
| 11/15/2013 6:20  | 0 |
| 11/15/2013 6:30  | 0 |
| 11/15/2013 6:40  | 0 |
| 11/15/2013 6:50  | 0 |
| 11/15/2013 7:00  | 0 |
| 11/15/2013 7:10  | 0 |
| 11/15/2013 7:20  | 0 |
| 11/15/2013 7:30  | 0 |
| 11/15/2013 7:40  | 0 |
| 11/15/2013 7:50  | 0 |
| 11/15/2013 8:00  | 0 |
| 11/15/2013 8:10  | 0 |
| 11/15/2013 8:20  | 0 |
| 11/15/2013 8:30  | 0 |
| 11/15/2013 8:40  | 0 |
| 11/15/2013 8:50  | 0 |
| 11/15/2013 9:00  | 0 |
| 11/15/2013 9:10  | 0 |
| 11/15/2013 9:20  | 0 |
| 11/15/2013 9:30  | 0 |
| 11/15/2013 9:40  | 0 |
| 11/15/2013 9:50  | 0 |
| 11/15/2013 10:00 | 0 |
| 11/15/2013 10:10 | 0 |
| 11/15/2013 10:20 | 0 |
| 11/15/2013 10:30 | 0 |
| 11/15/2013 10:40 | 0 |
| 11/15/2013 10:50 | 0 |
| 11/15/2013 11:00 | 0 |
| 11/15/2013 11:10 | 0 |
| 11/15/2013 11:20 | 0 |
| 11/15/2013 11:30 | 0 |
| 11/15/2013 11:40 | 0 |
| 11/15/2013 11:50 | 0 |
| 11/15/2013 12:00 | 0 |
| 11/15/2013 12:10 | 0 |
| 11/15/2013 12:20 | 0 |
| 11/15/2013 12:30 | 0 |
| 11/15/2013 12:40 | 0 |
| 11/15/2013 12:50 | 0 |

|                  |   |
|------------------|---|
| 11/15/2013 13:00 | 0 |
| 11/15/2013 13:10 | 0 |
| 11/15/2013 13:20 | 0 |
| 11/15/2013 13:30 | 0 |
| 11/15/2013 13:40 | 0 |
| 11/15/2013 13:50 | 0 |
| 11/15/2013 14:00 | 0 |
| 11/15/2013 14:10 | 0 |
| 11/15/2013 14:20 | 0 |
| 11/15/2013 14:30 | 0 |
| 11/15/2013 14:40 | 0 |
| 11/15/2013 14:50 | 0 |
| 11/15/2013 15:00 | 0 |
| 11/15/2013 15:10 | 0 |
| 11/15/2013 15:20 | 0 |
| 11/15/2013 15:30 | 0 |
| 11/15/2013 15:40 | 0 |
| 11/15/2013 15:50 | 0 |
| 11/15/2013 16:00 | 0 |
| 11/15/2013 16:10 | 0 |
| 11/15/2013 16:20 | 0 |
| 11/15/2013 16:30 | 0 |
| 11/15/2013 16:40 | 0 |
| 11/15/2013 16:50 | 0 |
| 11/15/2013 17:00 | 0 |
| 11/15/2013 17:10 | 0 |
| 11/15/2013 17:20 | 0 |
| 11/15/2013 17:30 | 0 |
| 11/15/2013 17:40 | 0 |
| 11/15/2013 17:50 | 0 |
| 11/15/2013 18:00 | 0 |
| 11/15/2013 18:10 | 0 |
| 11/15/2013 18:20 | 0 |
| 11/15/2013 18:30 | 0 |
| 11/15/2013 18:40 | 0 |
| 11/15/2013 18:50 | 0 |
| 11/15/2013 19:00 | 0 |
| 11/15/2013 19:10 | 0 |
| 11/15/2013 19:20 | 0 |
| 11/15/2013 19:30 | 0 |
| 11/15/2013 19:40 | 0 |
| 11/15/2013 19:50 | 0 |
| 11/15/2013 20:00 | 0 |
| 11/15/2013 20:10 | 0 |
| 11/15/2013 20:20 | 0 |
| 11/15/2013 20:30 | 0 |
| 11/15/2013 20:40 | 0 |



|                  |   |
|------------------|---|
| 11/15/2013 20:50 | 0 |
| 11/15/2013 21:00 | 0 |
| 11/15/2013 21:10 | 0 |
| 11/15/2013 21:20 | 0 |
| 11/15/2013 21:30 | 0 |
| 11/15/2013 21:40 | 0 |
| 11/15/2013 21:50 | 0 |
| 11/15/2013 22:00 | 0 |
| 11/15/2013 22:10 | 0 |
| 11/15/2013 22:20 | 0 |
| 11/15/2013 22:30 | 0 |
| 11/15/2013 22:40 | 0 |
| 11/15/2013 22:50 | 0 |
| 11/15/2013 23:00 | 0 |
| 11/15/2013 23:10 | 0 |
| 11/15/2013 23:20 | 0 |
| 11/15/2013 23:30 | 0 |
| 11/15/2013 23:40 | 0 |
| 11/15/2013 23:50 | 0 |
| 11/16/2013 0:00  | 0 |
| 11/16/2013 0:10  | 0 |
| 11/16/2013 0:20  | 0 |
| 11/16/2013 0:30  | 0 |
| 11/16/2013 0:40  | 0 |
| 11/16/2013 0:50  | 0 |
| 11/16/2013 1:00  | 0 |
| 11/16/2013 1:10  | 0 |
| 11/16/2013 1:20  | 0 |
| 11/16/2013 1:30  | 0 |
| 11/16/2013 1:40  | 0 |
| 11/16/2013 1:50  | 0 |
| 11/16/2013 2:00  | 0 |
| 11/16/2013 2:10  | 0 |
| 11/16/2013 2:20  | 0 |
| 11/16/2013 2:30  | 0 |
| 11/16/2013 2:40  | 0 |
| 11/16/2013 2:50  | 0 |
| 11/16/2013 3:00  | 0 |
| 11/16/2013 3:10  | 0 |
| 11/16/2013 3:20  | 0 |
| 11/16/2013 3:30  | 0 |
| 11/16/2013 3:40  | 0 |
| 11/16/2013 3:50  | 0 |
| 11/16/2013 4:00  | 0 |
| 11/16/2013 4:10  | 0 |
| 11/16/2013 4:20  | 0 |
| 11/16/2013 4:30  | 0 |

|                  |        |
|------------------|--------|
| 11/16/2013 4:40  | 0      |
| 11/16/2013 4:50  | 0      |
| 11/16/2013 5:00  | 0      |
| 11/16/2013 5:10  | 0      |
| 11/16/2013 5:20  | 0      |
| 11/16/2013 5:30  | 0      |
| 11/16/2013 5:40  | 0      |
| 11/16/2013 5:50  | 0      |
| 11/16/2013 6:00  | 0      |
| 11/16/2013 6:10  | 0      |
| 11/16/2013 6:20  | 0      |
| 11/16/2013 6:30  | 0      |
| 11/16/2013 6:40  | 0      |
| 11/16/2013 6:50  | 0      |
| 11/16/2013 7:00  | 0      |
| 11/16/2013 7:10  | 0      |
| 11/16/2013 7:20  | 0      |
| 11/16/2013 7:30  | 0      |
| 11/16/2013 7:40  | 0      |
| 11/16/2013 7:50  | 0      |
| 11/16/2013 8:00  | 0      |
| 11/16/2013 8:10  | 0      |
| 11/16/2013 8:20  | 0      |
| 11/16/2013 8:30  | 0      |
| 11/16/2013 8:40  | 0      |
| 11/16/2013 8:50  | 0      |
| 11/16/2013 9:00  | 0      |
| 11/16/2013 9:10  | 0      |
| 11/16/2013 9:20  | 0      |
| 11/16/2013 9:30  | 0      |
| 11/16/2013 9:40  | 0      |
| 11/16/2013 9:50  | 0      |
| 11/16/2013 10:00 | 0      |
| 11/16/2013 10:10 | 0      |
| 11/16/2013 10:20 | 0      |
| 11/16/2013 10:30 | 0      |
| 11/16/2013 10:40 | 0      |
| 11/16/2013 10:50 | 0      |
| 11/16/2013 11:00 | 0      |
| 11/16/2013 11:10 | 0      |
| 11/16/2013 11:20 | 0      |
| 11/16/2013 11:30 | 0      |
| 11/16/2013 11:40 | 0      |
| 11/16/2013 11:50 | 0      |
| 11/16/2013 12:00 | 0      |
| 11/16/2013 12:10 | 0      |
| 11/16/2013 12:20 | 0.0254 |

|                  |        |
|------------------|--------|
| 11/16/2013 12:30 | 0.0254 |
| 11/16/2013 12:40 | 0.0254 |
| 11/16/2013 12:50 | 0.0254 |
| 11/16/2013 13:00 | 0.0254 |
| 11/16/2013 13:10 | 0.0254 |
| 11/16/2013 13:20 | 0.0254 |
| 11/16/2013 13:30 | 0.0254 |
| 11/16/2013 13:40 | 0.0254 |
| 11/16/2013 13:50 | 0.0254 |
| 11/16/2013 14:00 | 0.0254 |
| 11/16/2013 14:10 | 0.0254 |
| 11/16/2013 14:20 | 0.0254 |
| 11/16/2013 14:30 | 0.0254 |
| 11/16/2013 14:40 | 0.0254 |
| 11/16/2013 14:50 | 0.0254 |
| 11/16/2013 15:00 | 0.0254 |
| 11/16/2013 15:10 | 0.0254 |
| 11/16/2013 15:20 | 0.0254 |
| 11/16/2013 15:30 | 0.0254 |
| 11/16/2013 15:40 | 0.0254 |
| 11/16/2013 15:50 | 0.0254 |
| 11/16/2013 16:00 | 0.0254 |
| 11/16/2013 16:10 | 0.0254 |
| 11/16/2013 16:20 | 0.0254 |
| 11/16/2013 16:30 | 0.0254 |
| 11/16/2013 16:40 | 0.0254 |
| 11/16/2013 16:50 | 0.0254 |
| 11/16/2013 17:00 | 0.0254 |
| 11/16/2013 17:10 | 0.0254 |
| 11/16/2013 17:20 | 0.0254 |
| 11/16/2013 17:30 | 0.0254 |
| 11/16/2013 17:40 | 0.0254 |
| 11/16/2013 17:50 | 0.0254 |
| 11/16/2013 18:00 | 0.0254 |
| 11/16/2013 18:10 | 0.0254 |
| 11/16/2013 18:20 | 0.0254 |
| 11/16/2013 18:30 | 0.0254 |
| 11/16/2013 18:40 | 0.0254 |
| 11/16/2013 18:50 | 0.0254 |
| 11/16/2013 19:00 | 0.0254 |
| 11/16/2013 19:10 | 0.0254 |
| 11/16/2013 19:20 | 0.0254 |
| 11/16/2013 19:30 | 0.0254 |
| 11/16/2013 19:40 | 0.0254 |
| 11/16/2013 19:50 | 0.0254 |
| 11/16/2013 20:00 | 0.0254 |
| 11/16/2013 20:10 | 0.0254 |

|                  |        |
|------------------|--------|
| 11/16/2013 20:20 | 0.0254 |
| 11/16/2013 20:30 | 0.0254 |
| 11/16/2013 20:40 | 0.0254 |
| 11/16/2013 20:50 | 0.0254 |
| 11/16/2013 21:00 | 0.0254 |
| 11/16/2013 21:10 | 0.0254 |
| 11/16/2013 21:20 | 0.0254 |
| 11/16/2013 21:30 | 0.0254 |
| 11/16/2013 21:40 | 0.0254 |
| 11/16/2013 21:50 | 0.0254 |
| 11/16/2013 22:00 | 0.0254 |
| 11/16/2013 22:10 | 0.0254 |
| 11/16/2013 22:20 | 0.0254 |
| 11/16/2013 22:30 | 0.0254 |
| 11/16/2013 22:40 | 0.0254 |
| 11/16/2013 22:50 | 0.0254 |
| 11/16/2013 23:00 | 0.0254 |
| 11/16/2013 23:10 | 0.0254 |
| 11/16/2013 23:20 | 0.0254 |
| 11/16/2013 23:30 | 0.0254 |
| 11/16/2013 23:40 | 0.0254 |
| 11/16/2013 23:50 | 0.0254 |
| 11/17/2013 0:00  | 0      |
| 11/17/2013 0:10  | 0      |
| 11/17/2013 0:20  | 0      |
| 11/17/2013 0:30  | 0      |
| 11/17/2013 0:40  | 0      |
| 11/17/2013 0:50  | 0      |
| 11/17/2013 1:00  | 0      |
| 11/17/2013 1:10  | 0      |
| 11/17/2013 1:20  | 0      |
| 11/17/2013 1:30  | 0      |
| 11/17/2013 1:40  | 0      |
| 11/17/2013 1:50  | 0      |
| 11/17/2013 2:00  | 0      |
| 11/17/2013 2:10  | 0      |
| 11/17/2013 2:20  | 0      |
| 11/17/2013 2:30  | 0      |
| 11/17/2013 2:40  | 0      |
| 11/17/2013 2:50  | 0      |
| 11/17/2013 3:00  | 0      |
| 11/17/2013 3:10  | 0      |
| 11/17/2013 3:20  | 0      |
| 11/17/2013 3:30  | 0.0254 |
| 11/17/2013 3:40  | 0.0254 |
| 11/17/2013 3:50  | 0.0254 |
| 11/17/2013 4:00  | 0.0254 |

|                  |        |
|------------------|--------|
| 11/17/2013 4:10  | 0.0254 |
| 11/17/2013 4:20  | 0.0254 |
| 11/17/2013 4:30  | 0.0254 |
| 11/17/2013 4:40  | 0.0254 |
| 11/17/2013 4:50  | 0.0254 |
| 11/17/2013 5:00  | 0.0508 |
| 11/17/2013 5:10  | 0.0508 |
| 11/17/2013 5:20  | 0.0508 |
| 11/17/2013 5:30  | 0.0508 |
| 11/17/2013 5:40  | 0.0508 |
| 11/17/2013 5:50  | 0.0508 |
| 11/17/2013 6:00  | 0.0508 |
| 11/17/2013 6:10  | 0.0508 |
| 11/17/2013 6:20  | 0.0508 |
| 11/17/2013 6:30  | 0.127  |
| 11/17/2013 6:40  | 0.2032 |
| 11/17/2013 6:50  | 0.3302 |
| 11/17/2013 7:00  | 0.3556 |
| 11/17/2013 7:10  | 0.381  |
| 11/17/2013 7:20  | 0.381  |
| 11/17/2013 7:30  | 0.4064 |
| 11/17/2013 7:40  | 0.4064 |
| 11/17/2013 7:50  | 0.4064 |
| 11/17/2013 8:00  | 0.4064 |
| 11/17/2013 8:10  | 0.4064 |
| 11/17/2013 8:20  | 0.4064 |
| 11/17/2013 8:30  | 0.4064 |
| 11/17/2013 8:40  | 0.4064 |
| 11/17/2013 8:50  | 0.4064 |
| 11/17/2013 9:00  | 0.4064 |
| 11/17/2013 9:10  | 0.4064 |
| 11/17/2013 9:20  | 0.4318 |
| 11/17/2013 9:30  | 0.4318 |
| 11/17/2013 9:40  | 0.4826 |
| 11/17/2013 9:50  | 0.5334 |
| 11/17/2013 10:00 | 0.5588 |
| 11/17/2013 10:10 | 0.5842 |
| 11/17/2013 10:20 | 0.6096 |
| 11/17/2013 10:30 | 0.635  |
| 11/17/2013 10:40 | 0.635  |
| 11/17/2013 10:50 | 0.635  |
| 11/17/2013 11:00 | 0.6604 |
| 11/17/2013 11:10 | 0.6604 |
| 11/17/2013 11:20 | 0.6604 |
| 11/17/2013 11:30 | 0.6858 |
| 11/17/2013 11:40 | 0.6858 |
| 11/17/2013 11:50 | 0.6858 |

|                  |        |
|------------------|--------|
| 11/17/2013 12:00 | 0.6858 |
| 11/17/2013 12:10 | 0.6858 |
| 11/17/2013 12:20 | 0.6858 |
| 11/17/2013 12:30 | 0.6858 |
| 11/17/2013 12:40 | 0.6858 |
| 11/17/2013 12:50 | 0.6858 |
| 11/17/2013 13:00 | 0.6858 |
| 11/17/2013 13:10 | 0.6858 |
| 11/17/2013 13:20 | 0.6858 |
| 11/17/2013 13:30 | 0.6858 |
| 11/17/2013 13:40 | 0.6858 |
| 11/17/2013 13:50 | 0.6858 |
| 11/17/2013 14:00 | 0.6858 |
| 11/17/2013 14:10 | 0.6858 |
| 11/17/2013 14:20 | 0.6858 |
| 11/17/2013 14:30 | 0.6858 |
| 11/17/2013 14:40 | 0.6858 |
| 11/17/2013 14:50 | 0.6858 |
| 11/17/2013 15:00 | 0.6858 |
| 11/17/2013 15:10 | 0.6858 |
| 11/17/2013 15:20 | 0.6858 |
| 11/17/2013 15:30 | 0.6858 |
| 11/17/2013 15:40 | 0.6858 |
| 11/17/2013 15:50 | 0.6858 |
| 11/17/2013 16:00 | 0.6858 |
| 11/17/2013 16:10 | 0.6858 |
| 11/17/2013 16:20 | 0.6858 |
| 11/17/2013 16:30 | 0.6858 |
| 11/17/2013 16:40 | 0.6858 |
| 11/17/2013 16:50 | 0.6858 |
| 11/17/2013 17:00 | 0.6858 |
| 11/17/2013 17:10 | 0.6858 |
| 11/17/2013 17:20 | 0.6858 |
| 11/17/2013 17:30 | 0.6858 |
| 11/17/2013 17:40 | 0.6858 |
| 11/17/2013 17:50 | 0.6858 |
| 11/17/2013 18:00 | 0.6858 |
| 11/17/2013 18:10 | 0.6858 |
| 11/17/2013 18:20 | 0.6858 |
| 11/17/2013 18:30 | 0.6858 |
| 11/17/2013 18:40 | 0.6858 |
| 11/17/2013 18:50 | 0.6858 |
| 11/17/2013 19:00 | 0.6858 |
| 11/17/2013 19:10 | 0.6858 |
| 11/17/2013 19:20 | 0.6858 |
| 11/17/2013 19:30 | 0.6858 |
| 11/17/2013 19:40 | 0.6858 |

|                  |        |
|------------------|--------|
| 11/17/2013 19:50 | 0.6858 |
| 11/17/2013 20:00 | 0.6858 |
| 11/17/2013 20:10 | 0.6858 |
| 11/17/2013 20:20 | 0.6858 |
| 11/17/2013 20:30 | 0.6858 |
| 11/17/2013 20:40 | 0.6858 |
| 11/17/2013 20:50 | 0.6858 |
| 11/17/2013 21:00 | 0.6858 |
| 11/17/2013 21:10 | 0.6858 |
| 11/17/2013 21:20 | 0.6858 |
| 11/17/2013 21:30 | 0.6858 |
| 11/17/2013 21:40 | 0.6858 |
| 11/17/2013 21:50 | 0.6858 |
| 11/17/2013 22:00 | 0.6858 |
| 11/17/2013 22:10 | 0.6858 |
| 11/17/2013 22:20 | 0.6858 |
| 11/17/2013 22:30 | 0.6858 |
| 11/17/2013 22:40 | 0.6858 |
| 11/17/2013 22:50 | 0.6858 |
| 11/17/2013 23:00 | 0.6858 |
| 11/17/2013 23:10 | 0.6858 |
| 11/17/2013 23:20 | 0.6858 |
| 11/17/2013 23:30 | 0.6858 |
| 11/17/2013 23:40 | 0.6858 |
| 11/17/2013 23:50 | 0.6858 |
| 11/18/2013 0:00  | 0      |
| 11/18/2013 0:10  | 0      |
| 11/18/2013 0:20  | 0      |
| 11/18/2013 0:30  | 0      |
| 11/18/2013 0:40  | 0      |
| 11/18/2013 0:50  | 0      |
| 11/18/2013 1:00  | 0      |
| 11/18/2013 1:10  | 0      |
| 11/18/2013 1:20  | 0      |
| 11/18/2013 1:30  | 0      |
| 11/18/2013 1:40  | 0      |
| 11/18/2013 1:50  | 0      |
| 11/18/2013 2:00  | 0      |
| 11/18/2013 2:10  | 0      |
| 11/18/2013 2:20  | 0      |
| 11/18/2013 2:30  | 0      |
| 11/18/2013 2:40  | 0      |
| 11/18/2013 2:50  | 0      |
| 11/18/2013 3:00  | 0      |
| 11/18/2013 3:10  | 0      |
| 11/18/2013 3:20  | 0      |
| 11/18/2013 3:30  | 0      |

|                  |   |
|------------------|---|
| 11/18/2013 3:40  | 0 |
| 11/18/2013 3:50  | 0 |
| 11/18/2013 4:00  | 0 |
| 11/18/2013 4:10  | 0 |
| 11/18/2013 4:20  | 0 |
| 11/18/2013 4:30  | 0 |
| 11/18/2013 4:40  | 0 |
| 11/18/2013 4:50  | 0 |
| 11/18/2013 5:00  | 0 |
| 11/18/2013 5:10  | 0 |
| 11/18/2013 5:20  | 0 |
| 11/18/2013 5:30  | 0 |
| 11/18/2013 5:40  | 0 |
| 11/18/2013 5:50  | 0 |
| 11/18/2013 6:00  | 0 |
| 11/18/2013 6:10  | 0 |
| 11/18/2013 6:20  | 0 |
| 11/18/2013 6:30  | 0 |
| 11/18/2013 6:40  | 0 |
| 11/18/2013 6:50  | 0 |
| 11/18/2013 7:00  | 0 |
| 11/18/2013 7:10  | 0 |
| 11/18/2013 7:20  | 0 |
| 11/18/2013 7:30  | 0 |
| 11/18/2013 7:40  | 0 |
| 11/18/2013 7:50  | 0 |
| 11/18/2013 8:00  | 0 |
| 11/18/2013 8:10  | 0 |
| 11/18/2013 8:20  | 0 |
| 11/18/2013 8:30  | 0 |
| 11/18/2013 8:40  | 0 |
| 11/18/2013 8:50  | 0 |
| 11/18/2013 9:00  | 0 |
| 11/18/2013 9:10  | 0 |
| 11/18/2013 9:20  | 0 |
| 11/18/2013 9:30  | 0 |
| 11/18/2013 9:40  | 0 |
| 11/18/2013 9:50  | 0 |
| 11/18/2013 10:00 | 0 |
| 11/18/2013 10:10 | 0 |
| 11/18/2013 10:20 | 0 |
| 11/18/2013 10:30 | 0 |
| 11/18/2013 10:40 | 0 |
| 11/18/2013 10:50 | 0 |
| 11/18/2013 11:00 | 0 |
| 11/18/2013 11:10 | 0 |
| 11/18/2013 11:20 | 0 |



|                  |   |
|------------------|---|
| 11/18/2013 11:30 | 0 |
| 11/18/2013 11:40 | 0 |
| 11/18/2013 11:50 | 0 |
| 11/18/2013 12:00 | 0 |
| 11/18/2013 12:10 | 0 |
| 11/18/2013 12:20 | 0 |
| 11/18/2013 12:30 | 0 |
| 11/18/2013 12:40 | 0 |
| 11/18/2013 12:50 | 0 |
| 11/18/2013 13:00 | 0 |
| 11/18/2013 13:10 | 0 |
| 11/18/2013 13:20 | 0 |
| 11/18/2013 13:30 | 0 |
| 11/18/2013 13:40 | 0 |
| 11/18/2013 13:50 | 0 |
| 11/18/2013 14:00 | 0 |
| 11/18/2013 14:10 | 0 |
| 11/18/2013 14:20 | 0 |
| 11/18/2013 14:30 | 0 |
| 11/18/2013 14:40 | 0 |
| 11/18/2013 14:50 | 0 |
| 11/18/2013 15:00 | 0 |
| 11/18/2013 15:10 | 0 |
| 11/18/2013 15:20 | 0 |
| 11/18/2013 15:30 | 0 |
| 11/18/2013 15:40 | 0 |
| 11/18/2013 15:50 | 0 |
| 11/18/2013 16:00 | 0 |
| 11/18/2013 16:10 | 0 |
| 11/18/2013 16:20 | 0 |
| 11/18/2013 16:30 | 0 |
| 11/18/2013 16:40 | 0 |
| 11/18/2013 16:50 | 0 |
| 11/18/2013 17:00 | 0 |
| 11/18/2013 17:10 | 0 |
| 11/18/2013 17:20 | 0 |
| 11/18/2013 17:30 | 0 |
| 11/18/2013 17:40 | 0 |
| 11/18/2013 17:50 | 0 |
| 11/18/2013 18:00 | 0 |
| 11/18/2013 18:10 | 0 |
| 11/18/2013 18:20 | 0 |
| 11/18/2013 18:30 | 0 |
| 11/18/2013 18:40 | 0 |
| 11/18/2013 18:50 | 0 |
| 11/18/2013 19:00 | 0 |
| 11/18/2013 19:10 | 0 |

|                  |   |
|------------------|---|
| 11/18/2013 19:20 | 0 |
| 11/18/2013 19:30 | 0 |
| 11/18/2013 19:40 | 0 |
| 11/18/2013 19:50 | 0 |
| 11/18/2013 20:00 | 0 |
| 11/18/2013 20:10 | 0 |
| 11/18/2013 20:20 | 0 |
| 11/18/2013 20:30 | 0 |
| 11/18/2013 20:40 | 0 |
| 11/18/2013 20:50 | 0 |
| 11/18/2013 21:00 | 0 |
| 11/18/2013 21:10 | 0 |
| 11/18/2013 21:20 | 0 |
| 11/18/2013 21:30 | 0 |
| 11/18/2013 21:40 | 0 |
| 11/18/2013 21:50 | 0 |
| 11/18/2013 22:00 | 0 |
| 11/18/2013 22:10 | 0 |
| 11/18/2013 22:20 | 0 |
| 11/18/2013 22:30 | 0 |
| 11/18/2013 22:40 | 0 |
| 11/18/2013 22:50 | 0 |
| 11/18/2013 23:00 | 0 |
| 11/18/2013 23:10 | 0 |
| 11/18/2013 23:20 | 0 |
| 11/18/2013 23:30 | 0 |
| 11/18/2013 23:40 | 0 |
| 11/18/2013 23:50 | 0 |
| 11/19/2013 0:00  | 0 |
| 11/19/2013 0:10  | 0 |
| 11/19/2013 0:20  | 0 |
| 11/19/2013 0:30  | 0 |
| 11/19/2013 0:40  | 0 |
| 11/19/2013 0:50  | 0 |
| 11/19/2013 1:00  | 0 |
| 11/19/2013 1:10  | 0 |
| 11/19/2013 1:20  | 0 |
| 11/19/2013 1:30  | 0 |
| 11/19/2013 1:40  | 0 |
| 11/19/2013 1:50  | 0 |
| 11/19/2013 2:00  | 0 |
| 11/19/2013 2:10  | 0 |
| 11/19/2013 2:20  | 0 |
| 11/19/2013 2:30  | 0 |
| 11/19/2013 2:40  | 0 |
| 11/19/2013 2:50  | 0 |
| 11/19/2013 3:00  | 0 |

|                  |   |
|------------------|---|
| 11/19/2013 3:10  | 0 |
| 11/19/2013 3:20  | 0 |
| 11/19/2013 3:30  | 0 |
| 11/19/2013 3:40  | 0 |
| 11/19/2013 3:50  | 0 |
| 11/19/2013 4:00  | 0 |
| 11/19/2013 4:10  | 0 |
| 11/19/2013 4:20  | 0 |
| 11/19/2013 4:30  | 0 |
| 11/19/2013 4:40  | 0 |
| 11/19/2013 4:50  | 0 |
| 11/19/2013 5:00  | 0 |
| 11/19/2013 5:10  | 0 |
| 11/19/2013 5:20  | 0 |
| 11/19/2013 5:30  | 0 |
| 11/19/2013 5:40  | 0 |
| 11/19/2013 5:50  | 0 |
| 11/19/2013 6:00  | 0 |
| 11/19/2013 6:10  | 0 |
| 11/19/2013 6:20  | 0 |
| 11/19/2013 6:30  | 0 |
| 11/19/2013 6:40  | 0 |
| 11/19/2013 6:50  | 0 |
| 11/19/2013 7:00  | 0 |
| 11/19/2013 7:10  | 0 |
| 11/19/2013 7:20  | 0 |
| 11/19/2013 7:30  | 0 |
| 11/19/2013 7:40  | 0 |
| 11/19/2013 7:50  | 0 |
| 11/19/2013 8:00  | 0 |
| 11/19/2013 8:10  | 0 |
| 11/19/2013 8:20  | 0 |
| 11/19/2013 8:30  | 0 |
| 11/19/2013 8:40  | 0 |
| 11/19/2013 8:50  | 0 |
| 11/19/2013 9:00  | 0 |
| 11/19/2013 9:10  | 0 |
| 11/19/2013 9:20  | 0 |
| 11/19/2013 9:30  | 0 |
| 11/19/2013 9:40  | 0 |
| 11/19/2013 9:50  | 0 |
| 11/19/2013 10:00 | 0 |
| 11/19/2013 10:10 | 0 |
| 11/19/2013 10:20 | 0 |
| 11/19/2013 10:30 | 0 |
| 11/19/2013 10:40 | 0 |
| 11/19/2013 10:50 | 0 |

|                  |   |
|------------------|---|
| 11/19/2013 11:00 | 0 |
| 11/19/2013 11:10 | 0 |
| 11/19/2013 11:20 | 0 |
| 11/19/2013 11:30 | 0 |
| 11/19/2013 11:40 | 0 |
| 11/19/2013 11:50 | 0 |
| 11/19/2013 12:00 | 0 |
| 11/19/2013 12:10 | 0 |
| 11/19/2013 12:20 | 0 |
| 11/19/2013 12:30 | 0 |
| 11/19/2013 12:40 | 0 |
| 11/19/2013 12:50 | 0 |
| 11/19/2013 13:00 | 0 |
| 11/19/2013 13:10 | 0 |
| 11/19/2013 13:20 | 0 |
| 11/19/2013 13:30 | 0 |
| 11/19/2013 13:40 | 0 |
| 11/19/2013 13:50 | 0 |
| 11/19/2013 14:00 | 0 |
| 11/19/2013 14:10 | 0 |
| 11/19/2013 14:20 | 0 |
| 11/19/2013 14:30 | 0 |
| 11/19/2013 14:40 | 0 |
| 11/19/2013 14:50 | 0 |
| 11/19/2013 15:00 | 0 |
| 11/19/2013 15:10 | 0 |
| 11/19/2013 15:20 | 0 |
| 11/19/2013 15:30 | 0 |
| 11/19/2013 15:40 | 0 |
| 11/19/2013 15:50 | 0 |
| 11/19/2013 16:00 | 0 |
| 11/19/2013 16:10 | 0 |
| 11/19/2013 16:20 | 0 |
| 11/19/2013 16:30 | 0 |
| 11/19/2013 16:40 | 0 |
| 11/19/2013 16:50 | 0 |
| 11/19/2013 17:00 | 0 |
| 11/19/2013 17:10 | 0 |
| 11/19/2013 17:20 | 0 |
| 11/19/2013 17:30 | 0 |
| 11/19/2013 17:40 | 0 |
| 11/19/2013 17:50 | 0 |
| 11/19/2013 18:00 | 0 |
| 11/19/2013 18:10 | 0 |
| 11/19/2013 18:20 | 0 |
| 11/19/2013 18:30 | 0 |
| 11/19/2013 18:40 | 0 |

|                  |   |
|------------------|---|
| 11/19/2013 18:50 | 0 |
| 11/19/2013 19:00 | 0 |
| 11/19/2013 19:10 | 0 |
| 11/19/2013 19:20 | 0 |
| 11/19/2013 19:30 | 0 |
| 11/19/2013 19:40 | 0 |
| 11/19/2013 19:50 | 0 |
| 11/19/2013 20:00 | 0 |
| 11/19/2013 20:10 | 0 |
| 11/19/2013 20:20 | 0 |
| 11/19/2013 20:30 | 0 |
| 11/19/2013 20:40 | 0 |
| 11/19/2013 20:50 | 0 |
| 11/19/2013 21:00 | 0 |
| 11/19/2013 21:10 | 0 |
| 11/19/2013 21:20 | 0 |
| 11/19/2013 21:30 | 0 |
| 11/19/2013 21:40 | 0 |
| 11/19/2013 21:50 | 0 |
| 11/19/2013 22:00 | 0 |
| 11/19/2013 22:10 | 0 |
| 11/19/2013 22:20 | 0 |
| 11/19/2013 22:30 | 0 |
| 11/19/2013 22:40 | 0 |
| 11/19/2013 22:50 | 0 |
| 11/19/2013 23:00 | 0 |
| 11/19/2013 23:10 | 0 |
| 11/19/2013 23:20 | 0 |
| 11/19/2013 23:30 | 0 |
| 11/19/2013 23:40 | 0 |
| 11/19/2013 23:50 | 0 |
| 11/20/2013 0:00  | 0 |
| 11/20/2013 0:10  | 0 |
| 11/20/2013 0:20  | 0 |
| 11/20/2013 0:30  | 0 |
| 11/20/2013 0:40  | 0 |
| 11/20/2013 0:50  | 0 |
| 11/20/2013 1:00  | 0 |
| 11/20/2013 1:10  | 0 |
| 11/20/2013 1:20  | 0 |
| 11/20/2013 1:30  | 0 |
| 11/20/2013 1:40  | 0 |
| 11/20/2013 1:50  | 0 |
| 11/20/2013 2:00  | 0 |
| 11/20/2013 2:10  | 0 |
| 11/20/2013 2:20  | 0 |
| 11/20/2013 2:30  | 0 |

|                  |        |
|------------------|--------|
| 11/20/2013 2:40  | 0      |
| 11/20/2013 2:50  | 0      |
| 11/20/2013 3:00  | 0      |
| 11/20/2013 3:10  | 0      |
| 11/20/2013 3:20  | 0      |
| 11/20/2013 3:30  | 0      |
| 11/20/2013 3:40  | 0      |
| 11/20/2013 3:50  | 0      |
| 11/20/2013 4:00  | 0      |
| 11/20/2013 4:10  | 0      |
| 11/20/2013 4:20  | 0      |
| 11/20/2013 4:30  | 0      |
| 11/20/2013 4:40  | 0      |
| 11/20/2013 4:50  | 0      |
| 11/20/2013 5:00  | 0.0254 |
| 11/20/2013 5:10  | 0.0508 |
| 11/20/2013 5:20  | 0.0508 |
| 11/20/2013 5:30  | 0.0508 |
| 11/20/2013 5:40  | 0.0762 |
| 11/20/2013 5:50  | 0.0762 |
| 11/20/2013 6:00  | 0.0762 |
| 11/20/2013 6:10  | 0.0762 |
| 11/20/2013 6:20  | 0.0762 |
| 11/20/2013 6:30  | 0.0762 |
| 11/20/2013 6:40  | 0.0762 |
| 11/20/2013 6:50  | 0.0762 |
| 11/20/2013 7:00  | 0.0762 |
| 11/20/2013 7:10  | 0.0762 |
| 11/20/2013 7:20  | 0.0762 |
| 11/20/2013 7:30  | 0.0762 |
| 11/20/2013 7:40  | 0.0762 |
| 11/20/2013 7:50  | 0.0762 |
| 11/20/2013 8:00  | 0.0762 |
| 11/20/2013 8:10  | 0.0762 |
| 11/20/2013 8:20  | 0.0762 |
| 11/20/2013 8:30  | 0.0762 |
| 11/20/2013 8:40  | 0.0762 |
| 11/20/2013 8:50  | 0.0762 |
| 11/20/2013 9:00  | 0.0762 |
| 11/20/2013 9:10  | 0.0762 |
| 11/20/2013 9:20  | 0.0762 |
| 11/20/2013 9:30  | 0.0762 |
| 11/20/2013 9:40  | 0.0762 |
| 11/20/2013 9:50  | 0.0762 |
| 11/20/2013 10:00 | 0.0762 |
| 11/20/2013 10:10 | 0.0762 |
| 11/20/2013 10:20 | 0.0762 |

|                  |        |
|------------------|--------|
| 11/20/2013 10:30 | 0.0762 |
| 11/20/2013 10:40 | 0.0762 |
| 11/20/2013 10:50 | 0.0762 |
| 11/20/2013 11:00 | 0.0762 |
| 11/20/2013 11:10 | 0.0762 |
| 11/20/2013 11:20 | 0.0762 |
| 11/20/2013 11:30 | 0.0762 |
| 11/20/2013 11:40 | 0.0762 |
| 11/20/2013 11:50 | 0.0762 |
| 11/20/2013 12:00 | 0.0762 |
| 11/20/2013 12:10 | 0.0762 |
| 11/20/2013 12:20 | 0.0762 |
| 11/20/2013 12:30 | 0.0762 |
| 11/20/2013 12:40 | 0.0762 |
| 11/20/2013 12:50 | 0.0762 |
| 11/20/2013 13:00 | 0.0762 |
| 11/20/2013 13:10 | 0.0762 |
| 11/20/2013 13:20 | 0.0762 |
| 11/20/2013 13:30 | 0.0762 |
| 11/20/2013 13:40 | 0.0762 |
| 11/20/2013 13:50 | 0.0762 |
| 11/20/2013 14:00 | 0.0762 |
| 11/20/2013 14:10 | 0.0762 |
| 11/20/2013 14:20 | 0.0762 |
| 11/20/2013 14:30 | 0.0762 |
| 11/20/2013 14:40 | 0.0762 |
| 11/20/2013 14:50 | 0.0762 |
| 11/20/2013 15:00 | 0.0762 |
| 11/20/2013 15:10 | 0.0762 |
| 11/20/2013 15:20 | 0.0762 |
| 11/20/2013 15:30 | 0.0762 |
| 11/20/2013 15:40 | 0.0762 |
| 11/20/2013 15:50 | 0.0762 |
| 11/20/2013 16:00 | 0.0762 |
| 11/20/2013 16:10 | 0.0762 |
| 11/20/2013 16:20 | 0.0762 |
| 11/20/2013 16:30 | 0.0762 |
| 11/20/2013 16:40 | 0.0762 |
| 11/20/2013 16:50 | 0.0762 |
| 11/20/2013 17:00 | 0.0762 |
| 11/20/2013 17:10 | 0.0762 |
| 11/20/2013 17:20 | 0.0762 |
| 11/20/2013 17:30 | 0.0762 |
| 11/20/2013 17:40 | 0.0762 |
| 11/20/2013 17:50 | 0.0762 |
| 11/20/2013 18:00 | 0.0762 |
| 11/20/2013 18:10 | 0.0762 |

|                  |        |
|------------------|--------|
| 11/20/2013 18:20 | 0.0762 |
| 11/20/2013 18:30 | 0.0762 |
| 11/20/2013 18:40 | 0.0762 |
| 11/20/2013 18:50 | 0.0762 |
| 11/20/2013 19:00 | 0.0762 |
| 11/20/2013 19:10 | 0.0762 |
| 11/20/2013 19:20 | 0.0762 |
| 11/20/2013 19:30 | 0.0762 |
| 11/20/2013 19:40 | 0.0762 |
| 11/20/2013 19:50 | 0.0762 |
| 11/20/2013 20:00 | 0.0762 |
| 11/20/2013 20:10 | 0.0762 |
| 11/20/2013 20:20 | 0.0762 |
| 11/20/2013 20:30 | 0.0762 |
| 11/20/2013 20:40 | 0.0762 |
| 11/20/2013 20:50 | 0.0762 |
| 11/20/2013 21:00 | 0.0762 |
| 11/20/2013 21:10 | 0.0762 |
| 11/20/2013 21:20 | 0.0762 |
| 11/20/2013 21:30 | 0.0762 |
| 11/20/2013 21:40 | 0.0762 |
| 11/20/2013 21:50 | 0.0762 |
| 11/20/2013 22:00 | 0.0762 |
| 11/20/2013 22:10 | 0.0762 |
| 11/20/2013 22:20 | 0.0762 |
| 11/20/2013 22:30 | 0.0762 |
| 11/20/2013 22:40 | 0.0762 |
| 11/20/2013 22:50 | 0.0762 |
| 11/20/2013 23:00 | 0.0762 |
| 11/20/2013 23:10 | 0.0762 |
| 11/20/2013 23:20 | 0.0762 |
| 11/20/2013 23:30 | 0.0762 |
| 11/20/2013 23:40 | 0.0762 |
| 11/20/2013 23:50 | 0.0762 |
| 11/21/2013 0:00  | 0      |
| 11/21/2013 0:10  | 0      |
| 11/21/2013 0:20  | 0      |
| 11/21/2013 0:30  | 0      |
| 11/21/2013 0:40  | 0      |
| 11/21/2013 0:50  | 0      |
| 11/21/2013 1:00  | 0      |
| 11/21/2013 1:10  | 0      |
| 11/21/2013 1:20  | 0      |
| 11/21/2013 1:30  | 0      |
| 11/21/2013 1:40  | 0      |
| 11/21/2013 1:50  | 0      |
| 11/21/2013 2:00  | 0      |



|                 |        |
|-----------------|--------|
| 11/21/2013 2:10 | 0      |
| 11/21/2013 2:20 | 0      |
| 11/21/2013 2:30 | 0      |
| 11/21/2013 2:40 | 0      |
| 11/21/2013 2:50 | 0      |
| 11/21/2013 3:00 | 0      |
| 11/21/2013 3:10 | 0      |
| 11/21/2013 3:20 | 0      |
| 11/21/2013 3:30 | 0      |
| 11/21/2013 3:40 | 0      |
| 11/21/2013 3:50 | 0      |
| 11/21/2013 4:00 | 0      |
| 11/21/2013 4:10 | 0      |
| 11/21/2013 4:20 | 0      |
| 11/21/2013 4:30 | 0      |
| 11/21/2013 4:40 | 0      |
| 11/21/2013 4:50 | 0      |
| 11/21/2013 5:00 | 0      |
| 11/21/2013 5:10 | 0.0254 |
| 11/21/2013 5:20 | 0.0254 |
| 11/21/2013 5:30 | 0.0254 |
| 11/21/2013 5:40 | 0.0254 |
| 11/21/2013 5:50 | 0.0254 |
| 11/21/2013 6:00 | 0.0254 |
| 11/21/2013 6:10 | 0.0254 |
| 11/21/2013 6:20 | 0.0254 |
| 11/21/2013 6:30 | 0.0254 |
| 11/21/2013 6:40 | 0.0254 |
| 11/21/2013 6:50 | 0.0254 |
| 11/21/2013 7:00 | 0.0254 |
| 11/21/2013 7:10 | 0.0254 |
| 11/21/2013 7:20 | 0.0254 |
| 11/21/2013 7:30 | 0.0254 |
| 11/21/2013 7:40 | 0.0254 |
| 11/21/2013 7:50 | 0.0254 |
| 11/21/2013 8:00 | 0.0254 |
| 11/21/2013 8:10 | 0.0254 |
| 11/21/2013 8:20 | 0.0254 |
| 11/21/2013 8:30 | 0.0254 |
| 11/21/2013 8:40 | 0.0254 |
| 11/21/2013 8:50 | 0.0254 |
| 11/21/2013 9:00 | 0.0254 |
| 11/21/2013 9:10 | 0.0254 |
| 11/21/2013 9:20 | 0.0254 |
| 11/21/2013 9:30 | 0.0254 |
| 11/21/2013 9:40 | 0.0254 |
| 11/21/2013 9:50 | 0.0254 |

|                  |        |
|------------------|--------|
| 11/21/2013 10:00 | 0.0254 |
| 11/21/2013 10:10 | 0.0254 |
| 11/21/2013 10:20 | 0.0254 |
| 11/21/2013 10:30 | 0.0254 |
| 11/21/2013 10:40 | 0.0254 |
| 11/21/2013 10:50 | 0.0254 |
| 11/21/2013 11:00 | 0.0254 |
| 11/21/2013 11:10 | 0.0254 |
| 11/21/2013 11:20 | 0.0254 |
| 11/21/2013 11:30 | 0.0254 |
| 11/21/2013 11:40 | 0.0254 |
| 11/21/2013 11:50 | 0.0254 |
| 11/21/2013 12:00 | 0.0254 |
| 11/21/2013 12:10 | 0.0254 |
| 11/21/2013 12:20 | 0.0254 |
| 11/21/2013 12:30 | 0.0254 |
| 11/21/2013 12:40 | 0.0254 |
| 11/21/2013 12:50 | 0.0254 |
| 11/21/2013 13:00 | 0.0254 |
| 11/21/2013 13:10 | 0.0254 |
| 11/21/2013 13:20 | 0.0254 |
| 11/21/2013 13:30 | 0.0254 |
| 11/21/2013 13:40 | 0.0254 |
| 11/21/2013 13:50 | 0.0254 |
| 11/21/2013 14:00 | 0.0254 |
| 11/21/2013 14:10 | 0.0254 |
| 11/21/2013 14:20 | 0.0254 |
| 11/21/2013 14:30 | 0.0254 |
| 11/21/2013 14:40 | 0.0254 |
| 11/21/2013 14:50 | 0.0254 |
| 11/21/2013 15:00 | 0.0254 |
| 11/21/2013 15:10 | 0.0254 |
| 11/21/2013 15:20 | 0.0254 |
| 11/21/2013 15:30 | 0.0254 |
| 11/21/2013 15:40 | 0.0254 |
| 11/21/2013 15:50 | 0.0254 |
| 11/21/2013 16:00 | 0.0254 |
| 11/21/2013 16:10 | 0.0254 |
| 11/21/2013 16:20 | 0.0254 |
| 11/21/2013 16:30 | 0.0254 |
| 11/21/2013 16:40 | 0.0254 |
| 11/21/2013 16:50 | 0.0254 |
| 11/21/2013 17:00 | 0.0254 |
| 11/21/2013 17:10 | 0.0254 |
| 11/21/2013 17:20 | 0.0254 |
| 11/21/2013 17:30 | 0.0254 |
| 11/21/2013 17:40 | 0.0254 |

|                  |        |
|------------------|--------|
| 11/21/2013 17:50 | 0.0254 |
| 11/21/2013 18:00 | 0.0254 |
| 11/21/2013 18:10 | 0.0254 |
| 11/21/2013 18:20 | 0.0254 |
| 11/21/2013 18:30 | 0.0254 |
| 11/21/2013 18:40 | 0.0254 |
| 11/21/2013 18:50 | 0.0254 |
| 11/21/2013 19:00 | 0.0254 |
| 11/21/2013 19:10 | 0.0254 |
| 11/21/2013 19:20 | 0.0254 |
| 11/21/2013 19:30 | 0.0254 |
| 11/21/2013 19:40 | 0.0254 |
| 11/21/2013 19:50 | 0.0254 |
| 11/21/2013 20:00 | 0.0254 |
| 11/21/2013 20:10 | 0.0254 |
| 11/21/2013 20:20 | 0.0254 |
| 11/21/2013 20:30 | 0.0254 |
| 11/21/2013 20:40 | 0.0254 |
| 11/21/2013 20:50 | 0.0254 |
| 11/21/2013 21:00 | 0.0254 |
| 11/21/2013 21:10 | 0.0254 |
| 11/21/2013 21:20 | 0.0254 |
| 11/21/2013 21:30 | 0.0254 |
| 11/21/2013 21:40 | 0.0254 |
| 11/21/2013 21:50 | 0.0254 |
| 11/21/2013 22:00 | 0.0254 |
| 11/21/2013 22:10 | 0.0254 |
| 11/21/2013 22:20 | 0.0254 |
| 11/21/2013 22:30 | 0.0254 |
| 11/21/2013 22:40 | 0.0254 |
| 11/21/2013 22:50 | 0.0254 |
| 11/21/2013 23:00 | 0.0254 |
| 11/21/2013 23:10 | 0.0254 |
| 11/21/2013 23:20 | 0.0254 |
| 11/21/2013 23:30 | 0.0254 |
| 11/21/2013 23:40 | 0.0254 |
| 11/21/2013 23:50 | 0.0254 |
| 11/22/2013 0:00  | 0      |
| 11/22/2013 0:10  | 0      |
| 11/22/2013 0:20  | 0      |
| 11/22/2013 0:30  | 0      |
| 11/22/2013 0:40  | 0      |
| 11/22/2013 0:50  | 0      |
| 11/22/2013 1:00  | 0      |
| 11/22/2013 1:10  | 0      |
| 11/22/2013 1:20  | 0      |
| 11/22/2013 1:30  | 0      |

|                 |   |
|-----------------|---|
| 11/22/2013 1:40 | 0 |
| 11/22/2013 1:50 | 0 |
| 11/22/2013 2:00 | 0 |
| 11/22/2013 2:10 | 0 |
| 11/22/2013 2:20 | 0 |
| 11/22/2013 2:30 | 0 |
| 11/22/2013 2:40 | 0 |
| 11/22/2013 2:50 | 0 |
| 11/22/2013 3:00 | 0 |
| 11/22/2013 3:10 | 0 |
| 11/22/2013 3:20 | 0 |
| 11/22/2013 3:30 | 0 |
| 11/22/2013 3:40 | 0 |
| 11/22/2013 3:50 | 0 |
| 11/22/2013 4:00 | 0 |
| 11/22/2013 4:10 | 0 |
| 11/22/2013 4:20 | 0 |
| 11/22/2013 4:30 | 0 |
| 11/22/2013 4:40 | 0 |
| 11/22/2013 4:50 | 0 |
| 11/22/2013 5:00 | 0 |
| 11/22/2013 5:10 | 0 |
| 11/22/2013 5:20 | 0 |
| 11/22/2013 5:30 | 0 |
| 11/22/2013 5:40 | 0 |
| 11/22/2013 5:50 | 0 |
| 11/22/2013 6:00 | 0 |
| 11/22/2013 6:10 | 0 |
| 11/22/2013 6:20 | 0 |
| 11/22/2013 6:30 | 0 |
| 11/22/2013 6:40 | 0 |
| 11/22/2013 6:50 | 0 |
| 11/22/2013 7:00 | 0 |
| 11/22/2013 7:10 | 0 |
| 11/22/2013 7:20 | 0 |
| 11/22/2013 7:30 | 0 |
| 11/22/2013 7:40 | 0 |
| 11/22/2013 7:50 | 0 |
| 11/22/2013 8:00 | 0 |
| 11/22/2013 8:10 | 0 |
| 11/22/2013 8:20 | 0 |
| 11/22/2013 8:30 | 0 |
| 11/22/2013 8:40 | 0 |
| 11/22/2013 8:50 | 0 |
| 11/22/2013 9:00 | 0 |
| 11/22/2013 9:10 | 0 |
| 11/22/2013 9:20 | 0 |

|                  |   |
|------------------|---|
| 11/22/2013 9:30  | 0 |
| 11/22/2013 9:40  | 0 |
| 11/22/2013 9:50  | 0 |
| 11/22/2013 10:00 | 0 |
| 11/22/2013 10:10 | 0 |
| 11/22/2013 10:20 | 0 |
| 11/22/2013 10:30 | 0 |
| 11/22/2013 10:40 | 0 |
| 11/22/2013 10:50 | 0 |
| 11/22/2013 11:00 | 0 |
| 11/22/2013 11:10 | 0 |
| 11/22/2013 11:20 | 0 |
| 11/22/2013 11:30 | 0 |
| 11/22/2013 11:40 | 0 |
| 11/22/2013 11:50 | 0 |
| 11/22/2013 12:00 | 0 |
| 11/22/2013 12:10 | 0 |
| 11/22/2013 12:20 | 0 |
| 11/22/2013 12:30 | 0 |
| 11/22/2013 12:40 | 0 |
| 11/22/2013 12:50 | 0 |
| 11/22/2013 13:00 | 0 |
| 11/22/2013 13:10 | 0 |
| 11/22/2013 13:20 | 0 |
| 11/22/2013 13:30 | 0 |
| 11/22/2013 13:40 | 0 |
| 11/22/2013 13:50 | 0 |
| 11/22/2013 14:00 | 0 |
| 11/22/2013 14:10 | 0 |
| 11/22/2013 14:20 | 0 |
| 11/22/2013 14:30 | 0 |
| 11/22/2013 14:40 | 0 |
| 11/22/2013 14:50 | 0 |
| 11/22/2013 15:00 | 0 |
| 11/22/2013 15:10 | 0 |
| 11/22/2013 15:20 | 0 |
| 11/22/2013 15:30 | 0 |
| 11/22/2013 15:40 | 0 |
| 11/22/2013 15:50 | 0 |
| 11/22/2013 16:00 | 0 |
| 11/22/2013 16:10 | 0 |
| 11/22/2013 16:20 | 0 |
| 11/22/2013 16:30 | 0 |
| 11/22/2013 16:40 | 0 |
| 11/22/2013 16:50 | 0 |
| 11/22/2013 17:00 | 0 |
| 11/22/2013 17:10 | 0 |

|                  |   |
|------------------|---|
| 11/22/2013 17:20 | 0 |
| 11/22/2013 17:30 | 0 |
| 11/22/2013 17:40 | 0 |
| 11/22/2013 17:50 | 0 |
| 11/22/2013 18:00 | 0 |
| 11/22/2013 18:10 | 0 |
| 11/22/2013 18:20 | 0 |
| 11/22/2013 18:30 | 0 |
| 11/22/2013 18:40 | 0 |
| 11/22/2013 18:50 | 0 |
| 11/22/2013 19:00 | 0 |
| 11/22/2013 19:10 | 0 |
| 11/22/2013 19:20 | 0 |
| 11/22/2013 19:30 | 0 |
| 11/22/2013 19:40 | 0 |
| 11/22/2013 19:50 | 0 |
| 11/22/2013 20:00 | 0 |
| 11/22/2013 20:10 | 0 |
| 11/22/2013 20:20 | 0 |
| 11/22/2013 20:30 | 0 |
| 11/22/2013 20:40 | 0 |
| 11/22/2013 20:50 | 0 |
| 11/22/2013 21:00 | 0 |
| 11/22/2013 21:10 | 0 |
| 11/22/2013 21:20 | 0 |
| 11/22/2013 21:30 | 0 |
| 11/22/2013 21:40 | 0 |
| 11/22/2013 21:50 | 0 |
| 11/22/2013 22:00 | 0 |
| 11/22/2013 22:10 | 0 |
| 11/22/2013 22:20 | 0 |
| 11/22/2013 22:30 | 0 |
| 11/22/2013 22:40 | 0 |
| 11/22/2013 22:50 | 0 |
| 11/22/2013 23:00 | 0 |
| 11/22/2013 23:10 | 0 |
| 11/22/2013 23:20 | 0 |
| 11/22/2013 23:30 | 0 |
| 11/22/2013 23:40 | 0 |
| 11/22/2013 23:50 | 0 |
| 11/23/2013 0:00  | 0 |
| 11/23/2013 0:10  | 0 |
| 11/23/2013 0:20  | 0 |
| 11/23/2013 0:30  | 0 |
| 11/23/2013 0:40  | 0 |
| 11/23/2013 0:50  | 0 |
| 11/23/2013 1:00  | 0 |

|                 |   |
|-----------------|---|
| 11/23/2013 1:10 | 0 |
| 11/23/2013 1:20 | 0 |
| 11/23/2013 1:30 | 0 |
| 11/23/2013 1:40 | 0 |
| 11/23/2013 1:50 | 0 |
| 11/23/2013 2:00 | 0 |
| 11/23/2013 2:10 | 0 |
| 11/23/2013 2:20 | 0 |
| 11/23/2013 2:30 | 0 |
| 11/23/2013 2:40 | 0 |
| 11/23/2013 2:50 | 0 |
| 11/23/2013 3:00 | 0 |
| 11/23/2013 3:10 | 0 |
| 11/23/2013 3:20 | 0 |
| 11/23/2013 3:30 | 0 |
| 11/23/2013 3:40 | 0 |
| 11/23/2013 3:50 | 0 |
| 11/23/2013 4:00 | 0 |
| 11/23/2013 4:10 | 0 |
| 11/23/2013 4:20 | 0 |
| 11/23/2013 4:30 | 0 |
| 11/23/2013 4:40 | 0 |
| 11/23/2013 4:50 | 0 |
| 11/23/2013 5:00 | 0 |
| 11/23/2013 5:10 | 0 |
| 11/23/2013 5:20 | 0 |
| 11/23/2013 5:30 | 0 |
| 11/23/2013 5:40 | 0 |
| 11/23/2013 5:50 | 0 |
| 11/23/2013 6:00 | 0 |
| 11/23/2013 6:10 | 0 |
| 11/23/2013 6:20 | 0 |
| 11/23/2013 6:30 | 0 |
| 11/23/2013 6:40 | 0 |
| 11/23/2013 6:50 | 0 |
| 11/23/2013 7:00 | 0 |
| 11/23/2013 7:10 | 0 |
| 11/23/2013 7:20 | 0 |
| 11/23/2013 7:30 | 0 |
| 11/23/2013 7:40 | 0 |
| 11/23/2013 7:50 | 0 |
| 11/23/2013 8:00 | 0 |
| 11/23/2013 8:10 | 0 |
| 11/23/2013 8:20 | 0 |
| 11/23/2013 8:30 | 0 |
| 11/23/2013 8:40 | 0 |
| 11/23/2013 8:50 | 0 |

|                  |   |
|------------------|---|
| 11/23/2013 9:00  | 0 |
| 11/23/2013 9:10  | 0 |
| 11/23/2013 9:20  | 0 |
| 11/23/2013 9:30  | 0 |
| 11/23/2013 9:40  | 0 |
| 11/23/2013 9:50  | 0 |
| 11/23/2013 10:00 | 0 |
| 11/23/2013 10:10 | 0 |
| 11/23/2013 10:20 | 0 |
| 11/23/2013 10:30 | 0 |
| 11/23/2013 10:40 | 0 |
| 11/23/2013 10:50 | 0 |
| 11/23/2013 11:00 | 0 |
| 11/23/2013 11:10 | 0 |
| 11/23/2013 11:20 | 0 |
| 11/23/2013 11:30 | 0 |
| 11/23/2013 11:40 | 0 |
| 11/23/2013 11:50 | 0 |
| 11/23/2013 12:00 | 0 |
| 11/23/2013 12:10 | 0 |
| 11/23/2013 12:20 | 0 |
| 11/23/2013 12:30 | 0 |
| 11/23/2013 12:40 | 0 |
| 11/23/2013 12:50 | 0 |
| 11/23/2013 13:00 | 0 |
| 11/23/2013 13:10 | 0 |
| 11/23/2013 13:20 | 0 |
| 11/23/2013 13:30 | 0 |
| 11/23/2013 13:40 | 0 |
| 11/23/2013 13:50 | 0 |
| 11/23/2013 14:00 | 0 |
| 11/23/2013 14:10 | 0 |
| 11/23/2013 14:20 | 0 |
| 11/23/2013 14:30 | 0 |
| 11/23/2013 14:40 | 0 |
| 11/23/2013 14:50 | 0 |
| 11/23/2013 15:00 | 0 |
| 11/23/2013 15:10 | 0 |
| 11/23/2013 15:20 | 0 |
| 11/23/2013 15:30 | 0 |
| 11/23/2013 15:40 | 0 |
| 11/23/2013 15:50 | 0 |
| 11/23/2013 16:00 | 0 |
| 11/23/2013 16:10 | 0 |
| 11/23/2013 16:20 | 0 |
| 11/23/2013 16:30 | 0 |
| 11/23/2013 16:40 | 0 |



|                  |   |
|------------------|---|
| 11/23/2013 16:50 | 0 |
| 11/23/2013 17:00 | 0 |
| 11/23/2013 17:10 | 0 |
| 11/23/2013 17:20 | 0 |
| 11/23/2013 17:30 | 0 |
| 11/23/2013 17:40 | 0 |
| 11/23/2013 17:50 | 0 |
| 11/23/2013 18:00 | 0 |
| 11/23/2013 18:10 | 0 |
| 11/23/2013 18:20 | 0 |
| 11/23/2013 18:30 | 0 |
| 11/23/2013 18:40 | 0 |
| 11/23/2013 18:50 | 0 |
| 11/23/2013 19:00 | 0 |
| 11/23/2013 19:10 | 0 |
| 11/23/2013 19:20 | 0 |
| 11/23/2013 19:30 | 0 |
| 11/23/2013 19:40 | 0 |
| 11/23/2013 19:50 | 0 |
| 11/23/2013 20:00 | 0 |
| 11/23/2013 20:10 | 0 |
| 11/23/2013 20:20 | 0 |
| 11/23/2013 20:30 | 0 |
| 11/23/2013 20:40 | 0 |
| 11/23/2013 20:50 | 0 |
| 11/23/2013 21:00 | 0 |
| 11/23/2013 21:10 | 0 |
| 11/23/2013 21:20 | 0 |
| 11/23/2013 21:30 | 0 |
| 11/23/2013 21:40 | 0 |
| 11/23/2013 21:50 | 0 |
| 11/23/2013 22:00 | 0 |
| 11/23/2013 22:10 | 0 |
| 11/23/2013 22:20 | 0 |
| 11/23/2013 22:30 | 0 |
| 11/23/2013 22:40 | 0 |
| 11/23/2013 22:50 | 0 |
| 11/23/2013 23:00 | 0 |
| 11/23/2013 23:10 | 0 |
| 11/23/2013 23:20 | 0 |
| 11/23/2013 23:30 | 0 |
| 11/23/2013 23:40 | 0 |
| 11/23/2013 23:50 | 0 |
| 11/24/2013 0:00  | 0 |
| 11/24/2013 0:10  | 0 |
| 11/24/2013 0:20  | 0 |
| 11/24/2013 0:30  | 0 |

|                 |   |
|-----------------|---|
| 11/24/2013 0:40 | 0 |
| 11/24/2013 0:50 | 0 |
| 11/24/2013 1:00 | 0 |
| 11/24/2013 1:10 | 0 |
| 11/24/2013 1:20 | 0 |
| 11/24/2013 1:30 | 0 |
| 11/24/2013 1:40 | 0 |
| 11/24/2013 1:50 | 0 |
| 11/24/2013 2:00 | 0 |
| 11/24/2013 2:10 | 0 |
| 11/24/2013 2:20 | 0 |
| 11/24/2013 2:30 | 0 |
| 11/24/2013 2:40 | 0 |
| 11/24/2013 2:50 | 0 |
| 11/24/2013 3:00 | 0 |
| 11/24/2013 3:10 | 0 |
| 11/24/2013 3:20 | 0 |
| 11/24/2013 3:30 | 0 |
| 11/24/2013 3:40 | 0 |
| 11/24/2013 3:50 | 0 |
| 11/24/2013 4:00 | 0 |
| 11/24/2013 4:10 | 0 |
| 11/24/2013 4:20 | 0 |
| 11/24/2013 4:30 | 0 |
| 11/24/2013 4:40 | 0 |
| 11/24/2013 4:50 | 0 |
| 11/24/2013 5:00 | 0 |
| 11/24/2013 5:10 | 0 |
| 11/24/2013 5:20 | 0 |
| 11/24/2013 5:30 | 0 |
| 11/24/2013 5:40 | 0 |
| 11/24/2013 5:50 | 0 |
| 11/24/2013 6:00 | 0 |
| 11/24/2013 6:10 | 0 |
| 11/24/2013 6:20 | 0 |
| 11/24/2013 6:30 | 0 |
| 11/24/2013 6:40 | 0 |
| 11/24/2013 6:50 | 0 |
| 11/24/2013 7:00 | 0 |
| 11/24/2013 7:10 | 0 |
| 11/24/2013 7:20 | 0 |
| 11/24/2013 7:30 | 0 |
| 11/24/2013 7:40 | 0 |
| 11/24/2013 7:50 | 0 |
| 11/24/2013 8:00 | 0 |
| 11/24/2013 8:10 | 0 |
| 11/24/2013 8:20 | 0 |

|                  |   |
|------------------|---|
| 11/24/2013 8:30  | 0 |
| 11/24/2013 8:40  | 0 |
| 11/24/2013 8:50  | 0 |
| 11/24/2013 9:00  | 0 |
| 11/24/2013 9:10  | 0 |
| 11/24/2013 9:20  | 0 |
| 11/24/2013 9:30  | 0 |
| 11/24/2013 9:40  | 0 |
| 11/24/2013 9:50  | 0 |
| 11/24/2013 10:00 | 0 |
| 11/24/2013 10:10 | 0 |
| 11/24/2013 10:20 | 0 |
| 11/24/2013 10:30 | 0 |
| 11/24/2013 10:40 | 0 |
| 11/24/2013 10:50 | 0 |
| 11/24/2013 11:00 | 0 |
| 11/24/2013 11:10 | 0 |
| 11/24/2013 11:20 | 0 |
| 11/24/2013 11:30 | 0 |
| 11/24/2013 11:40 | 0 |
| 11/24/2013 11:50 | 0 |
| 11/24/2013 12:00 | 0 |
| 11/24/2013 12:10 | 0 |
| 11/24/2013 12:20 | 0 |
| 11/24/2013 12:30 | 0 |
| 11/24/2013 12:40 | 0 |
| 11/24/2013 12:50 | 0 |
| 11/24/2013 13:00 | 0 |
| 11/24/2013 13:10 | 0 |
| 11/24/2013 13:20 | 0 |
| 11/24/2013 13:30 | 0 |
| 11/24/2013 13:40 | 0 |
| 11/24/2013 13:50 | 0 |
| 11/24/2013 14:00 | 0 |
| 11/24/2013 14:10 | 0 |
| 11/24/2013 14:20 | 0 |
| 11/24/2013 14:30 | 0 |
| 11/24/2013 14:40 | 0 |
| 11/24/2013 14:50 | 0 |
| 11/24/2013 15:00 | 0 |
| 11/24/2013 15:10 | 0 |
| 11/24/2013 15:20 | 0 |
| 11/24/2013 15:30 | 0 |
| 11/24/2013 15:40 | 0 |
| 11/24/2013 15:50 | 0 |
| 11/24/2013 16:00 | 0 |
| 11/24/2013 16:10 | 0 |

|                  |   |
|------------------|---|
| 11/24/2013 16:20 | 0 |
| 11/24/2013 16:30 | 0 |
| 11/24/2013 16:40 | 0 |
| 11/24/2013 16:50 | 0 |
| 11/24/2013 17:00 | 0 |
| 11/24/2013 17:10 | 0 |
| 11/24/2013 17:20 | 0 |
| 11/24/2013 17:30 | 0 |
| 11/24/2013 17:40 | 0 |
| 11/24/2013 17:50 | 0 |
| 11/24/2013 18:00 | 0 |
| 11/24/2013 18:10 | 0 |
| 11/24/2013 18:20 | 0 |
| 11/24/2013 18:30 | 0 |
| 11/24/2013 18:40 | 0 |
| 11/24/2013 18:50 | 0 |
| 11/24/2013 19:00 | 0 |
| 11/24/2013 19:10 | 0 |
| 11/24/2013 19:20 | 0 |
| 11/24/2013 19:30 | 0 |
| 11/24/2013 19:40 | 0 |
| 11/24/2013 19:50 | 0 |
| 11/24/2013 20:00 | 0 |
| 11/24/2013 20:10 | 0 |
| 11/24/2013 20:20 | 0 |
| 11/24/2013 20:30 | 0 |
| 11/24/2013 20:40 | 0 |
| 11/24/2013 20:50 | 0 |
| 11/24/2013 21:00 | 0 |
| 11/24/2013 21:10 | 0 |
| 11/24/2013 21:20 | 0 |
| 11/24/2013 21:30 | 0 |
| 11/24/2013 21:40 | 0 |
| 11/24/2013 21:50 | 0 |
| 11/24/2013 22:00 | 0 |
| 11/24/2013 22:10 | 0 |
| 11/24/2013 22:20 | 0 |
| 11/24/2013 22:30 | 0 |
| 11/24/2013 22:40 | 0 |
| 11/24/2013 22:50 | 0 |
| 11/24/2013 23:00 | 0 |
| 11/24/2013 23:10 | 0 |
| 11/24/2013 23:20 | 0 |
| 11/24/2013 23:30 | 0 |
| 11/24/2013 23:40 | 0 |
| 11/24/2013 23:50 | 0 |
| 11/25/2013 0:00  | 0 |

|                 |   |
|-----------------|---|
| 11/25/2013 0:10 | 0 |
| 11/25/2013 0:20 | 0 |
| 11/25/2013 0:30 | 0 |
| 11/25/2013 0:40 | 0 |
| 11/25/2013 0:50 | 0 |
| 11/25/2013 1:00 | 0 |
| 11/25/2013 1:10 | 0 |
| 11/25/2013 1:20 | 0 |
| 11/25/2013 1:30 | 0 |
| 11/25/2013 1:40 | 0 |
| 11/25/2013 1:50 | 0 |
| 11/25/2013 2:00 | 0 |
| 11/25/2013 2:10 | 0 |
| 11/25/2013 2:20 | 0 |
| 11/25/2013 2:30 | 0 |
| 11/25/2013 2:40 | 0 |
| 11/25/2013 2:50 | 0 |
| 11/25/2013 3:00 | 0 |
| 11/25/2013 3:10 | 0 |
| 11/25/2013 3:20 | 0 |
| 11/25/2013 3:30 | 0 |
| 11/25/2013 3:40 | 0 |
| 11/25/2013 3:50 | 0 |
| 11/25/2013 4:00 | 0 |
| 11/25/2013 4:10 | 0 |
| 11/25/2013 4:20 | 0 |
| 11/25/2013 4:30 | 0 |
| 11/25/2013 4:40 | 0 |
| 11/25/2013 4:50 | 0 |
| 11/25/2013 5:00 | 0 |
| 11/25/2013 5:10 | 0 |
| 11/25/2013 5:20 | 0 |
| 11/25/2013 5:30 | 0 |
| 11/25/2013 5:40 | 0 |
| 11/25/2013 5:50 | 0 |
| 11/25/2013 6:00 | 0 |
| 11/25/2013 6:10 | 0 |
| 11/25/2013 6:20 | 0 |
| 11/25/2013 6:30 | 0 |
| 11/25/2013 6:40 | 0 |
| 11/25/2013 6:50 | 0 |
| 11/25/2013 7:00 | 0 |
| 11/25/2013 7:10 | 0 |
| 11/25/2013 7:20 | 0 |
| 11/25/2013 7:30 | 0 |
| 11/25/2013 7:40 | 0 |
| 11/25/2013 7:50 | 0 |

|                  |   |
|------------------|---|
| 11/25/2013 8:00  | 0 |
| 11/25/2013 8:10  | 0 |
| 11/25/2013 8:20  | 0 |
| 11/25/2013 8:30  | 0 |
| 11/25/2013 8:40  | 0 |
| 11/25/2013 8:50  | 0 |
| 11/25/2013 9:00  | 0 |
| 11/25/2013 9:10  | 0 |
| 11/25/2013 9:20  | 0 |
| 11/25/2013 9:30  | 0 |
| 11/25/2013 9:40  | 0 |
| 11/25/2013 9:50  | 0 |
| 11/25/2013 10:00 | 0 |
| 11/25/2013 10:10 | 0 |
| 11/25/2013 10:20 | 0 |
| 11/25/2013 10:30 | 0 |
| 11/25/2013 10:40 | 0 |
| 11/25/2013 10:50 | 0 |
| 11/25/2013 11:00 | 0 |
| 11/25/2013 11:10 | 0 |
| 11/25/2013 11:20 | 0 |
| 11/25/2013 11:30 | 0 |
| 11/25/2013 11:40 | 0 |
| 11/25/2013 11:50 | 0 |
| 11/25/2013 12:00 | 0 |
| 11/25/2013 12:10 | 0 |
| 11/25/2013 12:20 | 0 |
| 11/25/2013 12:30 | 0 |
| 11/25/2013 12:40 | 0 |
| 11/25/2013 12:50 | 0 |
| 11/25/2013 13:00 | 0 |
| 11/25/2013 13:10 | 0 |
| 11/25/2013 13:20 | 0 |
| 11/25/2013 13:30 | 0 |
| 11/25/2013 13:40 | 0 |
| 11/25/2013 13:50 | 0 |
| 11/25/2013 14:00 | 0 |
| 11/25/2013 14:10 | 0 |
| 11/25/2013 14:20 | 0 |
| 11/25/2013 14:30 | 0 |
| 11/25/2013 14:40 | 0 |
| 11/25/2013 14:50 | 0 |
| 11/25/2013 15:00 | 0 |
| 11/25/2013 15:10 | 0 |
| 11/25/2013 15:20 | 0 |
| 11/25/2013 15:30 | 0 |
| 11/25/2013 15:40 | 0 |

|                  |   |
|------------------|---|
| 11/25/2013 15:50 | 0 |
| 11/25/2013 16:00 | 0 |
| 11/25/2013 16:10 | 0 |
| 11/25/2013 16:20 | 0 |
| 11/25/2013 16:30 | 0 |
| 11/25/2013 16:40 | 0 |
| 11/25/2013 16:50 | 0 |
| 11/25/2013 17:00 | 0 |
| 11/25/2013 17:10 | 0 |
| 11/25/2013 17:20 | 0 |
| 11/25/2013 17:30 | 0 |
| 11/25/2013 17:40 | 0 |
| 11/25/2013 17:50 | 0 |
| 11/25/2013 18:00 | 0 |
| 11/25/2013 18:10 | 0 |
| 11/25/2013 18:20 | 0 |
| 11/25/2013 18:30 | 0 |
| 11/25/2013 18:40 | 0 |
| 11/25/2013 18:50 | 0 |
| 11/25/2013 19:00 | 0 |
| 11/25/2013 19:10 | 0 |
| 11/25/2013 19:20 | 0 |
| 11/25/2013 19:30 | 0 |
| 11/25/2013 19:40 | 0 |
| 11/25/2013 19:50 | 0 |
| 11/25/2013 20:00 | 0 |
| 11/25/2013 20:10 | 0 |
| 11/25/2013 20:20 | 0 |
| 11/25/2013 20:30 | 0 |
| 11/25/2013 20:40 | 0 |
| 11/25/2013 20:50 | 0 |
| 11/25/2013 21:00 | 0 |
| 11/25/2013 21:10 | 0 |
| 11/25/2013 21:20 | 0 |
| 11/25/2013 21:30 | 0 |
| 11/25/2013 21:40 | 0 |
| 11/25/2013 21:50 | 0 |
| 11/25/2013 22:00 | 0 |
| 11/25/2013 22:10 | 0 |
| 11/25/2013 22:20 | 0 |
| 11/25/2013 22:30 | 0 |
| 11/25/2013 22:40 | 0 |
| 11/25/2013 22:50 | 0 |
| 11/25/2013 23:00 | 0 |
| 11/25/2013 23:10 | 0 |
| 11/25/2013 23:20 | 0 |
| 11/25/2013 23:30 | 0 |

|                  |   |
|------------------|---|
| 11/25/2013 23:40 | 0 |
| 11/25/2013 23:50 | 0 |
| 11/26/2013 0:00  | 0 |
| 11/26/2013 0:10  | 0 |
| 11/26/2013 0:20  | 0 |
| 11/26/2013 0:30  | 0 |
| 11/26/2013 0:40  | 0 |
| 11/26/2013 0:50  | 0 |
| 11/26/2013 1:00  | 0 |
| 11/26/2013 1:10  | 0 |
| 11/26/2013 1:20  | 0 |
| 11/26/2013 1:30  | 0 |
| 11/26/2013 1:40  | 0 |
| 11/26/2013 1:50  | 0 |
| 11/26/2013 2:00  | 0 |
| 11/26/2013 2:10  | 0 |
| 11/26/2013 2:20  | 0 |
| 11/26/2013 2:30  | 0 |
| 11/26/2013 2:40  | 0 |
| 11/26/2013 2:50  | 0 |
| 11/26/2013 3:00  | 0 |
| 11/26/2013 3:10  | 0 |
| 11/26/2013 3:20  | 0 |
| 11/26/2013 3:30  | 0 |
| 11/26/2013 3:40  | 0 |
| 11/26/2013 3:50  | 0 |
| 11/26/2013 4:00  | 0 |
| 11/26/2013 4:10  | 0 |
| 11/26/2013 4:20  | 0 |
| 11/26/2013 4:30  | 0 |
| 11/26/2013 4:40  | 0 |
| 11/26/2013 4:50  | 0 |
| 11/26/2013 5:00  | 0 |
| 11/26/2013 5:10  | 0 |
| 11/26/2013 5:20  | 0 |
| 11/26/2013 5:40  | 0 |
| 11/26/2013 5:50  | 0 |
| 11/26/2013 6:00  | 0 |
| 11/26/2013 6:10  | 0 |
| 11/26/2013 6:20  | 0 |
| 11/26/2013 6:30  | 0 |
| 11/26/2013 6:40  | 0 |
| 11/26/2013 6:50  | 0 |
| 11/26/2013 7:00  | 0 |
| 11/26/2013 7:10  | 0 |
| 11/26/2013 7:20  | 0 |
| 11/26/2013 7:30  | 0 |



|                  |   |
|------------------|---|
| 11/26/2013 7:40  | 0 |
| 11/26/2013 7:50  | 0 |
| 11/26/2013 8:00  | 0 |
| 11/26/2013 8:10  | 0 |
| 11/26/2013 8:20  | 0 |
| 11/26/2013 8:30  | 0 |
| 11/26/2013 8:40  | 0 |
| 11/26/2013 8:50  | 0 |
| 11/26/2013 9:00  | 0 |
| 11/26/2013 9:10  | 0 |
| 11/26/2013 9:20  | 0 |
| 11/26/2013 9:30  | 0 |
| 11/26/2013 9:40  | 0 |
| 11/26/2013 9:50  | 0 |
| 11/26/2013 10:00 | 0 |
| 11/26/2013 10:10 | 0 |
| 11/26/2013 10:20 | 0 |
| 11/26/2013 10:30 | 0 |
| 11/26/2013 10:40 | 0 |
| 11/26/2013 10:50 | 0 |
| 11/26/2013 11:00 | 0 |
| 11/26/2013 11:10 | 0 |
| 11/26/2013 11:20 | 0 |
| 11/26/2013 11:30 | 0 |
| 11/26/2013 11:40 | 0 |
| 11/26/2013 11:50 | 0 |
| 11/26/2013 12:00 | 0 |
| 11/26/2013 12:10 | 0 |
| 11/26/2013 12:20 | 0 |
| 11/26/2013 12:30 | 0 |
| 11/26/2013 12:40 | 0 |
| 11/26/2013 12:50 | 0 |
| 11/26/2013 13:00 | 0 |
| 11/26/2013 13:10 | 0 |
| 11/26/2013 13:20 | 0 |
| 11/26/2013 13:30 | 0 |
| 11/26/2013 13:40 | 0 |
| 11/26/2013 13:50 | 0 |
| 11/26/2013 14:00 | 0 |
| 11/26/2013 14:10 | 0 |
| 11/26/2013 14:20 | 0 |
| 11/26/2013 14:30 | 0 |
| 11/26/2013 14:40 | 0 |
| 11/26/2013 14:50 | 0 |
| 11/26/2013 15:00 | 0 |
| 11/26/2013 15:10 | 0 |
| 11/26/2013 15:20 | 0 |

|                  |   |
|------------------|---|
| 11/26/2013 15:30 | 0 |
| 11/26/2013 15:40 | 0 |
| 11/26/2013 15:50 | 0 |
| 11/26/2013 16:00 | 0 |
| 11/26/2013 16:10 | 0 |
| 11/26/2013 16:20 | 0 |
| 11/26/2013 16:30 | 0 |
| 11/26/2013 16:40 | 0 |
| 11/26/2013 16:50 | 0 |
| 11/26/2013 17:00 | 0 |
| 11/26/2013 17:10 | 0 |
| 11/26/2013 17:20 | 0 |
| 11/26/2013 17:30 | 0 |
| 11/26/2013 17:40 | 0 |
| 11/26/2013 17:50 | 0 |
| 11/26/2013 18:00 | 0 |
| 11/26/2013 18:10 | 0 |
| 11/26/2013 18:20 | 0 |
| 11/26/2013 18:30 | 0 |
| 11/26/2013 18:40 | 0 |
| 11/26/2013 18:50 | 0 |
| 11/26/2013 19:00 | 0 |
| 11/26/2013 19:10 | 0 |
| 11/26/2013 19:20 | 0 |
| 11/26/2013 19:30 | 0 |
| 11/26/2013 19:40 | 0 |
| 11/26/2013 19:50 | 0 |
| 11/26/2013 20:00 | 0 |
| 11/26/2013 20:10 | 0 |
| 11/26/2013 20:20 | 0 |
| 11/26/2013 20:30 | 0 |
| 11/26/2013 20:40 | 0 |
| 11/26/2013 20:50 | 0 |
| 11/26/2013 21:00 | 0 |
| 11/26/2013 21:10 | 0 |
| 11/26/2013 21:20 | 0 |
| 11/26/2013 21:30 | 0 |
| 11/26/2013 21:40 | 0 |
| 11/26/2013 21:50 | 0 |
| 11/26/2013 22:00 | 0 |
| 11/26/2013 22:10 | 0 |
| 11/26/2013 22:20 | 0 |
| 11/26/2013 22:30 | 0 |
| 11/26/2013 22:40 | 0 |
| 11/26/2013 22:50 | 0 |
| 11/26/2013 23:00 | 0 |
| 11/26/2013 23:10 | 0 |

|                  |   |
|------------------|---|
| 11/26/2013 23:20 | 0 |
| 11/26/2013 23:30 | 0 |
| 11/26/2013 23:40 | 0 |
| 11/26/2013 23:50 | 0 |
| 11/27/2013 0:00  | 0 |
| 11/27/2013 0:10  | 0 |
| 11/27/2013 0:20  | 0 |
| 11/27/2013 0:30  | 0 |
| 11/27/2013 0:40  | 0 |
| 11/27/2013 0:50  | 0 |
| 11/27/2013 1:00  | 0 |
| 11/27/2013 1:10  | 0 |
| 11/27/2013 1:20  | 0 |
| 11/27/2013 1:30  | 0 |
| 11/27/2013 1:40  | 0 |
| 11/27/2013 1:50  | 0 |
| 11/27/2013 2:00  | 0 |
| 11/27/2013 2:10  | 0 |
| 11/27/2013 2:20  | 0 |
| 11/27/2013 2:30  | 0 |
| 11/27/2013 2:40  | 0 |
| 11/27/2013 2:50  | 0 |
| 11/27/2013 3:00  | 0 |
| 11/27/2013 3:10  | 0 |
| 11/27/2013 3:20  | 0 |
| 11/27/2013 3:30  | 0 |
| 11/27/2013 3:40  | 0 |
| 11/27/2013 3:50  | 0 |
| 11/27/2013 4:00  | 0 |
| 11/27/2013 4:10  | 0 |
| 11/27/2013 4:20  | 0 |
| 11/27/2013 4:30  | 0 |
| 11/27/2013 4:40  | 0 |
| 11/27/2013 4:50  | 0 |
| 11/27/2013 5:00  | 0 |
| 11/27/2013 5:10  | 0 |
| 11/27/2013 5:20  | 0 |
| 11/27/2013 5:30  | 0 |
| 11/27/2013 5:40  | 0 |
| 11/27/2013 5:50  | 0 |
| 11/27/2013 6:00  | 0 |
| 11/27/2013 6:10  | 0 |
| 11/27/2013 6:20  | 0 |
| 11/27/2013 6:30  | 0 |
| 11/27/2013 6:40  | 0 |
| 11/27/2013 6:50  | 0 |
| 11/27/2013 7:00  | 0 |

|                  |   |
|------------------|---|
| 11/27/2013 7:10  | 0 |
| 11/27/2013 7:20  | 0 |
| 11/27/2013 7:30  | 0 |
| 11/27/2013 7:40  | 0 |
| 11/27/2013 7:50  | 0 |
| 11/27/2013 8:00  | 0 |
| 11/27/2013 8:10  | 0 |
| 11/27/2013 8:20  | 0 |
| 11/27/2013 8:30  | 0 |
| 11/27/2013 8:40  | 0 |
| 11/27/2013 8:50  | 0 |
| 11/27/2013 9:00  | 0 |
| 11/27/2013 9:10  | 0 |
| 11/27/2013 9:20  | 0 |
| 11/27/2013 9:30  | 0 |
| 11/27/2013 9:40  | 0 |
| 11/27/2013 9:50  | 0 |
| 11/27/2013 10:00 | 0 |
| 11/27/2013 10:10 | 0 |
| 11/27/2013 10:20 | 0 |
| 11/27/2013 10:30 | 0 |
| 11/27/2013 10:40 | 0 |
| 11/27/2013 10:50 | 0 |
| 11/27/2013 11:00 | 0 |
| 11/27/2013 11:10 | 0 |
| 11/27/2013 11:20 | 0 |
| 11/27/2013 11:30 | 0 |
| 11/27/2013 11:40 | 0 |
| 11/27/2013 11:50 | 0 |
| 11/27/2013 12:00 | 0 |
| 11/27/2013 12:10 | 0 |
| 11/27/2013 12:20 | 0 |
| 11/27/2013 12:30 | 0 |
| 11/27/2013 12:40 | 0 |
| 11/27/2013 12:50 | 0 |
| 11/27/2013 13:00 | 0 |
| 11/27/2013 13:10 | 0 |
| 11/27/2013 13:20 | 0 |
| 11/27/2013 13:30 | 0 |
| 11/27/2013 13:40 | 0 |
| 11/27/2013 13:50 | 0 |
| 11/27/2013 14:00 | 0 |
| 11/27/2013 14:10 | 0 |
| 11/27/2013 14:20 | 0 |
| 11/27/2013 14:30 | 0 |
| 11/27/2013 14:40 | 0 |
| 11/27/2013 14:50 | 0 |

|                  |   |
|------------------|---|
| 11/27/2013 15:00 | 0 |
| 11/27/2013 15:10 | 0 |
| 11/27/2013 15:20 | 0 |
| 11/27/2013 15:30 | 0 |
| 11/27/2013 15:40 | 0 |
| 11/27/2013 15:50 | 0 |
| 11/27/2013 16:00 | 0 |
| 11/27/2013 16:10 | 0 |
| 11/27/2013 16:20 | 0 |
| 11/27/2013 16:30 | 0 |
| 11/27/2013 16:40 | 0 |
| 11/27/2013 16:50 | 0 |
| 11/27/2013 17:00 | 0 |
| 11/27/2013 17:10 | 0 |
| 11/27/2013 17:20 | 0 |
| 11/27/2013 17:30 | 0 |
| 11/27/2013 17:40 | 0 |
| 11/27/2013 17:50 | 0 |
| 11/27/2013 18:00 | 0 |
| 11/27/2013 18:10 | 0 |
| 11/27/2013 18:20 | 0 |
| 11/27/2013 18:30 | 0 |
| 11/27/2013 18:40 | 0 |
| 11/27/2013 18:50 | 0 |
| 11/27/2013 19:00 | 0 |
| 11/27/2013 19:10 | 0 |
| 11/27/2013 19:20 | 0 |
| 11/27/2013 19:30 | 0 |
| 11/27/2013 19:40 | 0 |
| 11/27/2013 19:50 | 0 |
| 11/27/2013 20:00 | 0 |
| 11/27/2013 20:10 | 0 |
| 11/27/2013 20:20 | 0 |
| 11/27/2013 20:30 | 0 |
| 11/27/2013 20:40 | 0 |
| 11/27/2013 20:50 | 0 |
| 11/27/2013 21:00 | 0 |
| 11/27/2013 21:10 | 0 |
| 11/27/2013 21:20 | 0 |
| 11/27/2013 21:30 | 0 |
| 11/27/2013 21:40 | 0 |
| 11/27/2013 21:50 | 0 |
| 11/27/2013 22:10 | 0 |
| 11/27/2013 22:20 | 0 |
| 11/27/2013 22:30 | 0 |
| 11/27/2013 22:40 | 0 |
| 11/27/2013 22:50 | 0 |

|                  |   |
|------------------|---|
| 11/27/2013 23:00 | 0 |
| 11/27/2013 23:10 | 0 |
| 11/27/2013 23:20 | 0 |
| 11/27/2013 23:30 | 0 |
| 11/27/2013 23:40 | 0 |
| 11/27/2013 23:50 | 0 |
| 11/28/2013 0:00  | 0 |
| 11/28/2013 0:10  | 0 |
| 11/28/2013 0:20  | 0 |
| 11/28/2013 0:30  | 0 |
| 11/28/2013 0:40  | 0 |
| 11/28/2013 0:50  | 0 |
| 11/28/2013 1:00  | 0 |
| 11/28/2013 1:10  | 0 |
| 11/28/2013 1:20  | 0 |
| 11/28/2013 1:30  | 0 |
| 11/28/2013 1:40  | 0 |
| 11/28/2013 1:50  | 0 |
| 11/28/2013 2:00  | 0 |
| 11/28/2013 2:10  | 0 |
| 11/28/2013 2:20  | 0 |
| 11/28/2013 2:30  | 0 |
| 11/28/2013 2:40  | 0 |
| 11/28/2013 2:50  | 0 |
| 11/28/2013 3:00  | 0 |
| 11/28/2013 3:10  | 0 |
| 11/28/2013 3:20  | 0 |
| 11/28/2013 3:30  | 0 |
| 11/28/2013 3:40  | 0 |
| 11/28/2013 3:50  | 0 |
| 11/28/2013 4:00  | 0 |
| 11/28/2013 4:10  | 0 |
| 11/28/2013 4:20  | 0 |
| 11/28/2013 4:30  | 0 |
| 11/28/2013 4:40  | 0 |
| 11/28/2013 4:50  | 0 |
| 11/28/2013 5:00  | 0 |
| 11/28/2013 5:10  | 0 |
| 11/28/2013 5:20  | 0 |
| 11/28/2013 5:30  | 0 |
| 11/28/2013 5:40  | 0 |
| 11/28/2013 5:50  | 0 |
| 11/28/2013 6:00  | 0 |
| 11/28/2013 6:10  | 0 |
| 11/28/2013 6:20  | 0 |
| 11/28/2013 6:30  | 0 |
| 11/28/2013 6:40  | 0 |

|                  |   |
|------------------|---|
| 11/28/2013 6:50  | 0 |
| 11/28/2013 7:00  | 0 |
| 11/28/2013 7:10  | 0 |
| 11/28/2013 7:20  | 0 |
| 11/28/2013 7:30  | 0 |
| 11/28/2013 7:40  | 0 |
| 11/28/2013 7:50  | 0 |
| 11/28/2013 8:00  | 0 |
| 11/28/2013 8:10  | 0 |
| 11/28/2013 8:20  | 0 |
| 11/28/2013 8:30  | 0 |
| 11/28/2013 8:40  | 0 |
| 11/28/2013 8:50  | 0 |
| 11/28/2013 9:00  | 0 |
| 11/28/2013 9:10  | 0 |
| 11/28/2013 9:20  | 0 |
| 11/28/2013 9:30  | 0 |
| 11/28/2013 9:40  | 0 |
| 11/28/2013 9:50  | 0 |
| 11/28/2013 10:00 | 0 |
| 11/28/2013 10:10 | 0 |
| 11/28/2013 10:20 | 0 |
| 11/28/2013 10:30 | 0 |
| 11/28/2013 10:40 | 0 |
| 11/28/2013 10:50 | 0 |
| 11/28/2013 11:00 | 0 |
| 11/28/2013 11:10 | 0 |
| 11/28/2013 11:20 | 0 |
| 11/28/2013 11:30 | 0 |
| 11/28/2013 11:40 | 0 |
| 11/28/2013 11:50 | 0 |
| 11/28/2013 12:00 | 0 |
| 11/28/2013 12:10 | 0 |
| 11/28/2013 12:20 | 0 |
| 11/28/2013 12:30 | 0 |
| 11/28/2013 12:40 | 0 |
| 11/28/2013 12:50 | 0 |
| 11/28/2013 13:00 | 0 |
| 11/28/2013 13:10 | 0 |
| 11/28/2013 13:20 | 0 |
| 11/28/2013 13:30 | 0 |
| 11/28/2013 13:40 | 0 |
| 11/28/2013 13:50 | 0 |
| 11/28/2013 14:00 | 0 |
| 11/28/2013 14:10 | 0 |
| 11/28/2013 14:20 | 0 |
| 11/28/2013 14:30 | 0 |

|                  |   |
|------------------|---|
| 11/28/2013 14:40 | 0 |
| 11/28/2013 14:50 | 0 |
| 11/28/2013 15:00 | 0 |
| 11/28/2013 15:10 | 0 |
| 11/28/2013 15:20 | 0 |
| 11/28/2013 15:30 | 0 |
| 11/28/2013 15:40 | 0 |
| 11/28/2013 15:50 | 0 |
| 11/28/2013 16:00 | 0 |
| 11/28/2013 16:10 | 0 |
| 11/28/2013 16:20 | 0 |
| 11/28/2013 16:30 | 0 |
| 11/28/2013 16:40 | 0 |
| 11/28/2013 16:50 | 0 |
| 11/28/2013 17:00 | 0 |
| 11/28/2013 17:10 | 0 |
| 11/28/2013 17:20 | 0 |
| 11/28/2013 17:30 | 0 |
| 11/28/2013 17:40 | 0 |
| 11/28/2013 17:50 | 0 |
| 11/28/2013 18:00 | 0 |
| 11/28/2013 18:10 | 0 |
| 11/28/2013 18:20 | 0 |
| 11/28/2013 18:30 | 0 |
| 11/28/2013 18:40 | 0 |
| 11/28/2013 18:50 | 0 |
| 11/28/2013 19:00 | 0 |
| 11/28/2013 19:10 | 0 |
| 11/28/2013 19:20 | 0 |
| 11/28/2013 19:30 | 0 |
| 11/28/2013 19:40 | 0 |
| 11/28/2013 19:50 | 0 |
| 11/28/2013 20:00 | 0 |
| 11/28/2013 20:10 | 0 |
| 11/28/2013 20:20 | 0 |
| 11/28/2013 20:30 | 0 |
| 11/28/2013 20:40 | 0 |
| 11/28/2013 20:50 | 0 |
| 11/28/2013 21:00 | 0 |
| 11/28/2013 21:10 | 0 |
| 11/28/2013 21:20 | 0 |
| 11/28/2013 21:30 | 0 |
| 11/28/2013 21:40 | 0 |
| 11/28/2013 21:50 | 0 |
| 11/28/2013 22:00 | 0 |
| 11/28/2013 22:10 | 0 |
| 11/28/2013 22:20 | 0 |



|                  |   |
|------------------|---|
| 11/28/2013 22:30 | 0 |
| 11/28/2013 22:40 | 0 |
| 11/28/2013 22:50 | 0 |
| 11/28/2013 23:00 | 0 |
| 11/28/2013 23:10 | 0 |
| 11/28/2013 23:20 | 0 |
| 11/28/2013 23:30 | 0 |
| 11/28/2013 23:40 | 0 |
| 11/28/2013 23:50 | 0 |
| 11/29/2013 0:00  | 0 |
| 11/29/2013 0:10  | 0 |
| 11/29/2013 0:20  | 0 |
| 11/29/2013 0:30  | 0 |
| 11/29/2013 0:40  | 0 |
| 11/29/2013 0:50  | 0 |
| 11/29/2013 1:00  | 0 |
| 11/29/2013 1:10  | 0 |
| 11/29/2013 1:20  | 0 |
| 11/29/2013 1:30  | 0 |
| 11/29/2013 1:40  | 0 |
| 11/29/2013 1:50  | 0 |
| 11/29/2013 2:00  | 0 |
| 11/29/2013 2:10  | 0 |
| 11/29/2013 2:20  | 0 |
| 11/29/2013 2:30  | 0 |
| 11/29/2013 2:40  | 0 |
| 11/29/2013 2:50  | 0 |
| 11/29/2013 3:00  | 0 |
| 11/29/2013 3:10  | 0 |
| 11/29/2013 3:20  | 0 |
| 11/29/2013 3:30  | 0 |
| 11/29/2013 3:40  | 0 |
| 11/29/2013 3:50  | 0 |
| 11/29/2013 4:00  | 0 |
| 11/29/2013 4:10  | 0 |
| 11/29/2013 4:20  | 0 |
| 11/29/2013 4:30  | 0 |
| 11/29/2013 4:40  | 0 |
| 11/29/2013 4:50  | 0 |
| 11/29/2013 5:00  | 0 |
| 11/29/2013 5:10  | 0 |
| 11/29/2013 5:20  | 0 |
| 11/29/2013 5:30  | 0 |
| 11/29/2013 5:40  | 0 |
| 11/29/2013 5:50  | 0 |
| 11/29/2013 6:00  | 0 |
| 11/29/2013 6:10  | 0 |

|                  |   |
|------------------|---|
| 11/29/2013 6:20  | 0 |
| 11/29/2013 6:30  | 0 |
| 11/29/2013 6:40  | 0 |
| 11/29/2013 6:50  | 0 |
| 11/29/2013 7:00  | 0 |
| 11/29/2013 7:10  | 0 |
| 11/29/2013 7:20  | 0 |
| 11/29/2013 7:30  | 0 |
| 11/29/2013 7:40  | 0 |
| 11/29/2013 7:50  | 0 |
| 11/29/2013 8:00  | 0 |
| 11/29/2013 8:10  | 0 |
| 11/29/2013 8:20  | 0 |
| 11/29/2013 8:30  | 0 |
| 11/29/2013 8:40  | 0 |
| 11/29/2013 8:50  | 0 |
| 11/29/2013 9:00  | 0 |
| 11/29/2013 9:10  | 0 |
| 11/29/2013 9:20  | 0 |
| 11/29/2013 9:30  | 0 |
| 11/29/2013 9:40  | 0 |
| 11/29/2013 9:50  | 0 |
| 11/29/2013 10:00 | 0 |
| 11/29/2013 10:10 | 0 |
| 11/29/2013 10:20 | 0 |
| 11/29/2013 10:30 | 0 |
| 11/29/2013 10:40 | 0 |
| 11/29/2013 10:50 | 0 |
| 11/29/2013 11:00 | 0 |
| 11/29/2013 11:10 | 0 |
| 11/29/2013 11:20 | 0 |
| 11/29/2013 11:30 | 0 |
| 11/29/2013 11:40 | 0 |
| 11/29/2013 11:50 | 0 |
| 11/29/2013 12:00 | 0 |
| 11/29/2013 12:10 | 0 |
| 11/29/2013 12:20 | 0 |
| 11/29/2013 12:30 | 0 |
| 11/29/2013 12:40 | 0 |
| 11/29/2013 12:50 | 0 |
| 11/29/2013 13:00 | 0 |
| 11/29/2013 13:10 | 0 |
| 11/29/2013 13:20 | 0 |
| 11/29/2013 13:30 | 0 |
| 11/29/2013 13:40 | 0 |
| 11/29/2013 13:50 | 0 |
| 11/29/2013 14:00 | 0 |

|                  |   |
|------------------|---|
| 11/29/2013 14:10 | 0 |
| 11/29/2013 14:20 | 0 |
| 11/29/2013 14:30 | 0 |
| 11/29/2013 14:40 | 0 |
| 11/29/2013 14:50 | 0 |
| 11/29/2013 15:00 | 0 |
| 11/29/2013 15:10 | 0 |
| 11/29/2013 15:20 | 0 |
| 11/29/2013 15:30 | 0 |
| 11/29/2013 15:40 | 0 |
| 11/29/2013 15:50 | 0 |
| 11/29/2013 16:00 | 0 |
| 11/29/2013 16:10 | 0 |
| 11/29/2013 16:20 | 0 |
| 11/29/2013 16:30 | 0 |
| 11/29/2013 16:40 | 0 |
| 11/29/2013 16:50 | 0 |
| 11/29/2013 17:00 | 0 |
| 11/29/2013 17:10 | 0 |
| 11/29/2013 17:20 | 0 |
| 11/29/2013 17:30 | 0 |
| 11/29/2013 17:40 | 0 |
| 11/29/2013 17:50 | 0 |
| 11/29/2013 18:00 | 0 |
| 11/29/2013 18:10 | 0 |
| 11/29/2013 18:20 | 0 |
| 11/29/2013 18:30 | 0 |
| 11/29/2013 18:40 | 0 |
| 11/29/2013 18:50 | 0 |
| 11/29/2013 19:00 | 0 |
| 11/29/2013 19:10 | 0 |
| 11/29/2013 19:20 | 0 |
| 11/29/2013 19:30 | 0 |
| 11/29/2013 19:40 | 0 |
| 11/29/2013 19:50 | 0 |
| 11/29/2013 20:00 | 0 |
| 11/29/2013 20:10 | 0 |
| 11/29/2013 20:20 | 0 |
| 11/29/2013 20:30 | 0 |
| 11/29/2013 20:40 | 0 |
| 11/29/2013 20:50 | 0 |
| 11/29/2013 21:00 | 0 |
| 11/29/2013 21:10 | 0 |
| 11/29/2013 21:20 | 0 |
| 11/29/2013 21:30 | 0 |
| 11/29/2013 21:40 | 0 |
| 11/29/2013 21:50 | 0 |

|                  |   |
|------------------|---|
| 11/29/2013 22:00 | 0 |
| 11/29/2013 22:10 | 0 |
| 11/29/2013 22:20 | 0 |
| 11/29/2013 22:30 | 0 |
| 11/29/2013 22:40 | 0 |
| 11/29/2013 22:50 | 0 |
| 11/29/2013 23:00 | 0 |
| 11/29/2013 23:10 | 0 |
| 11/29/2013 23:20 | 0 |
| 11/29/2013 23:30 | 0 |
| 11/29/2013 23:40 | 0 |
| 11/29/2013 23:50 | 0 |
| 11/30/2013 0:00  | 0 |
| 11/30/2013 0:10  | 0 |
| 11/30/2013 0:20  | 0 |
| 11/30/2013 0:30  | 0 |
| 11/30/2013 0:40  | 0 |
| 11/30/2013 0:50  | 0 |
| 11/30/2013 1:00  | 0 |
| 11/30/2013 1:10  | 0 |
| 11/30/2013 1:20  | 0 |
| 11/30/2013 1:30  | 0 |
| 11/30/2013 1:40  | 0 |
| 11/30/2013 1:50  | 0 |
| 11/30/2013 2:00  | 0 |
| 11/30/2013 2:10  | 0 |
| 11/30/2013 2:20  | 0 |
| 11/30/2013 2:30  | 0 |
| 11/30/2013 2:40  | 0 |
| 11/30/2013 2:50  | 0 |
| 11/30/2013 3:00  | 0 |
| 11/30/2013 3:10  | 0 |
| 11/30/2013 3:20  | 0 |
| 11/30/2013 3:30  | 0 |
| 11/30/2013 3:40  | 0 |
| 11/30/2013 3:50  | 0 |
| 11/30/2013 4:00  | 0 |
| 11/30/2013 4:10  | 0 |
| 11/30/2013 4:20  | 0 |
| 11/30/2013 4:30  | 0 |
| 11/30/2013 4:40  | 0 |
| 11/30/2013 4:50  | 0 |
| 11/30/2013 5:00  | 0 |
| 11/30/2013 5:10  | 0 |
| 11/30/2013 5:20  | 0 |
| 11/30/2013 5:30  | 0 |
| 11/30/2013 5:40  | 0 |

|                  |   |
|------------------|---|
| 11/30/2013 5:50  | 0 |
| 11/30/2013 6:00  | 0 |
| 11/30/2013 6:10  | 0 |
| 11/30/2013 6:20  | 0 |
| 11/30/2013 6:30  | 0 |
| 11/30/2013 6:40  | 0 |
| 11/30/2013 6:50  | 0 |
| 11/30/2013 7:00  | 0 |
| 11/30/2013 7:10  | 0 |
| 11/30/2013 7:20  | 0 |
| 11/30/2013 7:30  | 0 |
| 11/30/2013 7:40  | 0 |
| 11/30/2013 7:50  | 0 |
| 11/30/2013 8:00  | 0 |
| 11/30/2013 8:10  | 0 |
| 11/30/2013 8:20  | 0 |
| 11/30/2013 8:30  | 0 |
| 11/30/2013 8:40  | 0 |
| 11/30/2013 8:50  | 0 |
| 11/30/2013 9:00  | 0 |
| 11/30/2013 9:10  | 0 |
| 11/30/2013 9:20  | 0 |
| 11/30/2013 9:30  | 0 |
| 11/30/2013 9:40  | 0 |
| 11/30/2013 9:50  | 0 |
| 11/30/2013 10:00 | 0 |
| 11/30/2013 10:10 | 0 |
| 11/30/2013 10:20 | 0 |
| 11/30/2013 10:30 | 0 |
| 11/30/2013 10:40 | 0 |
| 11/30/2013 10:50 | 0 |
| 11/30/2013 11:00 | 0 |
| 11/30/2013 11:10 | 0 |
| 11/30/2013 11:20 | 0 |
| 11/30/2013 11:30 | 0 |
| 11/30/2013 11:40 | 0 |
| 11/30/2013 11:50 | 0 |
| 11/30/2013 12:00 | 0 |
| 11/30/2013 12:10 | 0 |
| 11/30/2013 12:20 | 0 |
| 11/30/2013 12:30 | 0 |
| 11/30/2013 12:40 | 0 |
| 11/30/2013 12:50 | 0 |
| 11/30/2013 13:00 | 0 |
| 11/30/2013 13:10 | 0 |
| 11/30/2013 13:20 | 0 |
| 11/30/2013 13:30 | 0 |

|                  |   |
|------------------|---|
| 11/30/2013 13:40 | 0 |
| 11/30/2013 13:50 | 0 |
| 11/30/2013 14:00 | 0 |
| 11/30/2013 14:10 | 0 |
| 11/30/2013 14:20 | 0 |
| 11/30/2013 14:30 | 0 |
| 11/30/2013 14:40 | 0 |
| 11/30/2013 14:50 | 0 |
| 11/30/2013 15:00 | 0 |
| 11/30/2013 15:10 | 0 |
| 11/30/2013 15:20 | 0 |
| 11/30/2013 15:30 | 0 |
| 11/30/2013 15:40 | 0 |
| 11/30/2013 15:50 | 0 |
| 11/30/2013 16:00 | 0 |
| 11/30/2013 16:10 | 0 |
| 11/30/2013 16:20 | 0 |
| 11/30/2013 16:30 | 0 |
| 11/30/2013 16:40 | 0 |
| 11/30/2013 16:50 | 0 |
| 11/30/2013 17:00 | 0 |
| 11/30/2013 17:10 | 0 |
| 11/30/2013 17:20 | 0 |
| 11/30/2013 17:30 | 0 |
| 11/30/2013 17:40 | 0 |
| 11/30/2013 17:50 | 0 |
| 11/30/2013 18:00 | 0 |
| 11/30/2013 18:10 | 0 |
| 11/30/2013 18:20 | 0 |
| 11/30/2013 18:30 | 0 |
| 11/30/2013 18:40 | 0 |
| 11/30/2013 18:50 | 0 |
| 11/30/2013 19:00 | 0 |
| 11/30/2013 19:10 | 0 |
| 11/30/2013 19:20 | 0 |
| 11/30/2013 19:30 | 0 |
| 11/30/2013 19:40 | 0 |
| 11/30/2013 19:50 | 0 |
| 11/30/2013 20:00 | 0 |
| 11/30/2013 20:10 | 0 |
| 11/30/2013 20:20 | 0 |
| 11/30/2013 20:30 | 0 |
| 11/30/2013 20:40 | 0 |
| 11/30/2013 20:50 | 0 |
| 11/30/2013 21:00 | 0 |
| 11/30/2013 21:10 | 0 |
| 11/30/2013 21:20 | 0 |

|                  |   |
|------------------|---|
| 11/30/2013 21:30 | 0 |
| 11/30/2013 21:40 | 0 |
| 11/30/2013 21:50 | 0 |
| 11/30/2013 22:00 | 0 |
| 11/30/2013 22:10 | 0 |
| 11/30/2013 22:20 | 0 |
| 11/30/2013 22:30 | 0 |
| 11/30/2013 22:40 | 0 |
| 11/30/2013 22:50 | 0 |
| 11/30/2013 23:00 | 0 |
| 11/30/2013 23:10 | 0 |
| 11/30/2013 23:20 | 0 |
| 11/30/2013 23:30 | 0 |
| 11/30/2013 23:40 | 0 |
| 11/30/2013 23:50 | 0 |
| 12/1/2013 0:00   | 0 |
