# Supplementary material for: Understanding the hydrologic impacts of wastewater treatment plant discharge to shallow groundwater: before and after plant shutdown
Source: Royal Society of Chemistry journal article supplement (doi:10.1039/c6ew00128a), 2016-01-01
Supplement: c6ew00128a1.zip [file c6ew00128a1.zip]

**Supporting Information**

In addition to supporting information, the water level, discharge, and precipitation data are available: <http://dx.doi.org/10.5066/F7RF5S3P>

Full citation:

Bradley, P.M., and Hubbard, L.E., 2016, Precipitation, surface-water discharge, and groundwater elevation data for Fourmile Creek, Ankeny, Iowa, USA during October 1, 2013 to November 30, 2013: U.S. Geological Survey data release, http://dx.doi.org/10.5066/F7RF5S3P

SI Figure 1. Photograph of recirculation of effluent upstream of the outfall during normal to low stream-flow conditions verified by surface-water dye-tracer test conducted in October of 2011. Arrows depict movement of the dye both downstream and upstream (recirculation) of the discharge point.

SI Table 1: Piezometer water-level data (m) and precipitation data (cm). Column headers corresponding to date/time, daily precipitation, U50-T2-R2, D10-IS-shall, D10-IS-int, D10-IS-deep, D10-T1-R1, D10-T1-R3, D10-T1-R4, D10-T1-R5, D10-T2-R2, D10-T3-R2, D330-LB, D2900-LB.

SI Table 2: Instantaneous and median daily stream flow data (m3s-1) for USGS 05485605 Fourmile Creek near Ankeny, IA DS1 and precipitation data (cm). Column headers corresponding to date/time, instantaneous stream flow data, precipitation date/time, precipitation, daily flow date, median daily flow.
