# Supplementary material for: Understanding the hydrologic impacts of wastewater treatment plant discharge to shallow groundwater: before and after plant shutdown
Source: Royal Society of Chemistry journal article supplement (doi:10.1039/c6ew00128a), 2016-01-01
Supplement: c6ew00128a1.zip [file c6ew00128a1.zip]

| Date           | dailyprecip | U50LBT2R2   | D10ISshall  | D10ISint   | D10ISdeep  | D10LBT1R1   |
|----------------|-------------|-------------|-------------|------------|------------|-------------|
| 10/1/2013 0:00 | 0           | 264.4341168 | 264.4329728 | 264.433048 | 264.410664 | 264.4077664 |
| 10/1/2013 0:10 | 0           | 264.433812  | 264.4329728 | 264.435048 | 264.413664 | 264.4087664 |
| 10/1/2013 0:20 | 0           | 264.4335072 | 264.4309728 | 264.433048 | 264.411664 | 264.4097664 |
| 10/1/2013 0:30 | 0           | 264.432288  | 264.4299728 | 264.432048 | 264.411664 | 264.4077664 |
| 10/1/2013 0:40 | 0           | 264.430764  | 264.4279728 | 264.433048 | 264.411664 | 264.4077664 |
| 10/1/2013 0:50 | 0           | 264.4295448 | 264.4229728 | 264.429048 | 264.408664 | 264.4027664 |
| 10/1/2013 1:00 | 0           | 264.4274112 | 264.4219728 | 264.431048 | 264.410664 | 264.4047664 |
| 10/1/2013 1:10 | 0           | 264.4258872 | 264.4179728 | 264.429048 | 264.410664 | 264.4047664 |
| 10/1/2013 1:20 | 0           | 264.4240584 | 264.4199728 | 264.428048 | 264.411664 | 264.4037664 |
| 10/1/2013 1:30 | 0           | 264.42162   | 264.4129728 | 264.425048 | 264.411664 | 264.4007664 |
| 10/1/2013 1:40 | 0           | 264.420096  | 264.4119728 | 264.424048 | 264.410664 | 264.3997664 |
| 10/1/2013 1:50 | 0           | 264.4167432 | 264.4059728 | 264.423048 | 264.410664 | 264.3957664 |
| 10/1/2013 2:00 | 0           | 264.4176576 | 264.4139728 | 264.421048 | 264.410664 | 264.3997664 |
| 10/1/2013 2:10 | 0           | 264.4143048 | 264.4019728 | 264.420048 | 264.410664 | 264.3947664 |
| 10/1/2013 2:20 | 0           | 264.415524  | 264.4099728 | 264.418048 | 264.410664 | 264.3957664 |
| 10/1/2013 2:30 | 0           | 264.4106472 | 264.3959728 | 264.416048 | 264.412664 | 264.3907664 |
| 10/1/2013 2:40 | 0           | 264.412476  | 264.4059728 | 264.413048 | 264.410664 | 264.3947664 |
| 10/1/2013 2:50 | 0           | 264.4057704 | 264.3889728 | 264.413048 | 264.411664 | 264.3887664 |
| 10/1/2013 3:00 | 0           | 264.40638   | 264.3949728 | 264.409048 | 264.410664 | 264.3887664 |
| 10/1/2013 3:10 | 0           | 264.4030272 | 264.3919728 | 264.408048 | 264.410664 | 264.3877664 |
| 10/1/2013 3:20 | 0           | 264.4036368 | 264.3889728 | 264.405048 | 264.408664 | 264.3857664 |
| 10/1/2013 3:30 | 0           | 264.4015032 | 264.3939728 | 264.404048 | 264.410664 | 264.3857664 |
| 10/1/2013 3:40 | 0           | 264.3999792 | 264.3829728 | 264.400048 | 264.408664 | 264.3847664 |
| 10/1/2013 3:50 | 0           | 264.400284  | 264.3919728 | 264.400048 | 264.410664 | 264.3857664 |
| 10/1/2013 4:00 | 0           | 264.3978456 | 264.3789728 | 264.398048 | 264.408664 | 264.3807664 |
| 10/1/2013 4:10 | 0           | 264.3981504 | 264.3889728 | 264.398048 | 264.410664 | 264.3837664 |
| 10/1/2013 4:20 | 0           | 264.3978456 | 264.3879728 | 264.396048 | 264.406664 | 264.3827664 |
| 10/1/2013 4:30 | 0           | 264.395712  | 264.3829728 | 264.396048 | 264.409664 | 264.3807664 |
| 10/1/2013 4:40 | 0           | 264.3969312 | 264.3849728 | 264.394048 | 264.407664 | 264.3797664 |
| 10/1/2013 4:50 | 0           | 264.3963216 | 264.3859728 | 264.393048 | 264.407664 | 264.3817664 |
| 10/1/2013 5:00 | 0           | 264.3966264 | 264.3879728 | 264.391048 | 264.408664 | 264.3807664 |
| 10/1/2013 5:10 | 0           | 264.394188  | 264.3799728 | 264.388048 | 264.406664 | 264.3747664 |
| 10/1/2013 5:20 | 0           | 264.395712  | 264.3899728 | 264.388048 | 264.405664 | 264.3787664 |
| 10/1/2013 5:30 | 0           | 264.3935784 | 264.3799728 | 264.388048 | 264.408664 | 264.3767664 |
| 10/1/2013 5:40 | 0           | 264.394188  | 264.3849728 | 264.387048 | 264.405664 | 264.3767664 |
| 10/1/2013 5:50 | 0           | 264.3920544 | 264.3779728 | 264.384048 | 264.404664 | 264.3747664 |
| 10/1/2013 6:00 | 0           | 264.3920544 | 264.3799728 | 264.387048 | 264.406664 | 264.3767664 |
| 10/1/2013 6:10 | 0           | 264.3929688 | 264.3849728 | 264.385048 | 264.405664 | 264.3747664 |
| 10/1/2013 6:20 | 0           | 264.3923592 | 264.3839728 | 264.386048 | 264.408664 | 264.3767664 |
| 10/1/2013 6:30 | 0           | 264.3920544 | 264.3819728 | 264.383048 | 264.406664 | 264.3747664 |
| 10/1/2013 6:40 | 0           | 264.392664  | 264.3829728 | 264.385048 | 264.408664 | 264.3747664 |
| 10/1/2013 6:50 | 0           | 264.3954072 | 264.3879728 | 264.383048 | 264.406664 | 264.3767664 |
| 10/1/2013 7:00 | 0           | 264.3975408 | 264.3949728 | 264.386048 | 264.408664 | 264.3787664 |
| 10/1/2013 7:10 | 0           | 264.3996744 | 264.4009728 | 264.389048 | 264.410664 | 264.3797664 |
| 10/1/2013 7:20 | 0           | 264.4021128 | 264.3979728 | 264.389048 | 264.407664 | 264.3827664 |
| 10/1/2013 7:30 | 0           | 264.4057704 | 264.4079728 | 264.391048 | 264.407664 | 264.3857664 |

|                 |   |             |             |            |            |             |
|-----------------|---|-------------|-------------|------------|------------|-------------|
| 10/1/2013 7:40  | 0 | 264.4072944 | 264.4099728 | 264.391048 | 264.404664 | 264.3847664 |
| 10/1/2013 7:50  | 0 | 264.409428  | 264.4069728 | 264.393048 | 264.408664 | 264.3867664 |
| 10/1/2013 8:00  | 0 | 264.4133904 | 264.4199728 | 264.395048 | 264.406664 | 264.3877664 |
| 10/1/2013 8:10  | 0 | 264.4173528 | 264.4249728 | 264.399048 | 264.405664 | 264.3907664 |
| 10/1/2013 8:20  | 0 | 264.420096  | 264.4289728 | 264.402048 | 264.405664 | 264.3927664 |
| 10/1/2013 8:30  | 0 | 264.423144  | 264.4309728 | 264.404048 | 264.405664 | 264.3957664 |
| 10/1/2013 8:40  | 0 | 264.4268016 | 264.4349728 | 264.408048 | 264.406664 | 264.3967664 |
| 10/1/2013 8:50  | 0 | 264.4298496 | 264.4409728 | 264.412048 | 264.406664 | 264.4037664 |
| 10/1/2013 9:00  | 0 | 264.4316784 | 264.4439728 | 264.416048 | 264.409664 | 264.4027664 |
| 10/1/2013 9:10  | 0 | 264.4341168 | 264.4449728 | 264.419048 | 264.405664 | 264.4037664 |
| 10/1/2013 9:20  | 0 | 264.4362504 | 264.4479728 | 264.423048 | 264.405664 | 264.4057664 |
| 10/1/2013 9:30  | 0 | 264.4386888 | 264.4479728 | 264.424048 | 264.403664 | 264.4077664 |
| 10/1/2013 9:40  | 0 | 264.4402128 | 264.4479728 | 264.427048 | 264.404664 | 264.4097664 |
| 10/1/2013 9:50  | 0 | 264.4396032 | 264.4449728 | 264.430048 | 264.404664 | 264.4077664 |
| 10/1/2013 10:00 | 0 | 264.4408224 | 264.4439728 | 264.432048 | 264.404664 | 264.4077664 |
| 10/1/2013 10:10 | 0 | 264.4411272 | 264.4499728 | 264.434048 | 264.406664 | 264.4077664 |
| 10/1/2013 10:20 | 0 | 264.4417368 | 264.4479728 | 264.436048 | 264.406664 | 264.4107664 |
| 10/1/2013 10:30 | 0 | 264.441432  | 264.4449728 | 264.438048 | 264.408664 | 264.4117664 |
| 10/1/2013 10:40 | 0 | 264.4405176 | 264.4419728 | 264.438048 | 264.405664 | 264.4087664 |
| 10/1/2013 10:50 | 0 | 264.4396032 | 264.4409728 | 264.439048 | 264.407664 | 264.4107664 |
| 10/1/2013 11:00 | 0 | 264.438384  | 264.4409728 | 264.438048 | 264.407664 | 264.4087664 |
| 10/1/2013 11:10 | 0 | 264.4374696 | 264.4409728 | 264.439048 | 264.407664 | 264.4107664 |
| 10/1/2013 11:20 | 0 | 264.43686   | 264.4359728 | 264.435048 | 264.406664 | 264.4037664 |
| 10/1/2013 11:30 | 0 | 264.4359456 | 264.4389728 | 264.438048 | 264.407664 | 264.4067664 |
| 10/1/2013 11:40 | 0 | 264.435336  | 264.4379728 | 264.436048 | 264.407664 | 264.4057664 |
| 10/1/2013 11:50 | 0 | 264.4347264 | 264.4359728 | 264.435048 | 264.407664 | 264.4057664 |
| 10/1/2013 12:00 | 0 | 264.433812  | 264.4329728 | 264.435048 | 264.408664 | 264.4047664 |
| 10/1/2013 12:10 | 0 | 264.432288  | 264.4309728 | 264.434048 | 264.406664 | 264.4027664 |
| 10/1/2013 12:20 | 0 | 264.430764  | 264.4299728 | 264.433048 | 264.406664 | 264.4027664 |
| 10/1/2013 12:30 | 0 | 264.4298496 | 264.4249728 | 264.432048 | 264.404664 | 264.3997664 |
| 10/1/2013 12:40 | 0 | 264.4283256 | 264.4279728 | 264.435048 | 264.409664 | 264.4017664 |
| 10/1/2013 12:50 | 0 | 264.4271064 | 264.4249728 | 264.432048 | 264.406664 | 264.3987664 |
| 10/1/2013 13:00 | 0 | 264.426192  | 264.4279728 | 264.431048 | 264.406664 | 264.3977664 |
| 10/1/2013 13:10 | 0 | 264.4249728 | 264.4249728 | 264.427048 | 264.403664 | 264.3957664 |
| 10/1/2013 13:20 | 0 | 264.4240584 | 264.4229728 | 264.427048 | 264.406664 | 264.3957664 |
| 10/1/2013 13:30 | 0 | 264.4237536 | 264.4259728 | 264.427048 | 264.407664 | 264.3957664 |
| 10/1/2013 13:40 | 0 | 264.4237536 | 264.4249728 | 264.427048 | 264.405664 | 264.3967664 |
| 10/1/2013 13:50 | 0 | 264.4234488 | 264.4229728 | 264.424048 | 264.405664 | 264.3937664 |
| 10/1/2013 14:00 | 0 | 264.4228392 | 264.4259728 | 264.427048 | 264.407664 | 264.3937664 |
| 10/1/2013 14:10 | 0 | 264.4219248 | 264.4239728 | 264.427048 | 264.408664 | 264.3947664 |
| 10/1/2013 14:20 | 0 | 264.4207056 | 264.4229728 | 264.426048 | 264.408664 | 264.3917664 |
| 10/1/2013 14:30 | 0 | 264.4194864 | 264.4199728 | 264.423048 | 264.405664 | 264.3897664 |
| 10/1/2013 14:40 | 0 | 264.418572  | 264.4189728 | 264.423048 | 264.406664 | 264.3897664 |
| 10/1/2013 14:50 | 0 | 264.4164384 | 264.4129728 | 264.420048 | 264.405664 | 264.3867664 |
| 10/1/2013 15:00 | 0 | 264.417048  | 264.4189728 | 264.420048 | 264.406664 | 264.3877664 |
| 10/1/2013 15:10 | 0 | 264.4164384 | 264.4159728 | 264.420048 | 264.406664 | 264.3867664 |
| 10/1/2013 15:20 | 0 | 264.4161336 | 264.4179728 | 264.419048 | 264.406664 | 264.3867664 |

|                 |   |             |             |            |            |             |
|-----------------|---|-------------|-------------|------------|------------|-------------|
| 10/1/2013 15:30 | 0 | 264.4158288 | 264.4179728 | 264.420048 | 264.406664 | 264.3847664 |
| 10/1/2013 15:40 | 0 | 264.4158288 | 264.4189728 | 264.418048 | 264.406664 | 264.3867664 |
| 10/1/2013 15:50 | 0 | 264.4152192 | 264.4149728 | 264.416048 | 264.403664 | 264.3837664 |
| 10/1/2013 16:00 | 0 | 264.414     | 264.4179728 | 264.419048 | 264.404664 | 264.3847664 |
| 10/1/2013 16:10 | 0 | 264.4152192 | 264.4159728 | 264.416048 | 264.401664 | 264.3867664 |
| 10/1/2013 16:20 | 0 | 264.415524  | 264.4189728 | 264.418048 | 264.404664 | 264.3867664 |
| 10/1/2013 16:30 | 0 | 264.415524  | 264.4189728 | 264.418048 | 264.406664 | 264.3867664 |
| 10/1/2013 16:40 | 0 | 264.4158288 | 264.4179728 | 264.418048 | 264.405664 | 264.3867664 |
| 10/1/2013 16:50 | 0 | 264.4158288 | 264.4179728 | 264.416048 | 264.405664 | 264.3847664 |
| 10/1/2013 17:00 | 0 | 264.414     | 264.4149728 | 264.416048 | 264.403664 | 264.3847664 |
| 10/1/2013 17:10 | 0 | 264.4149144 | 264.4179728 | 264.415048 | 264.405664 | 264.3847664 |
| 10/1/2013 17:20 | 0 | 264.4130856 | 264.4129728 | 264.415048 | 264.407664 | 264.3847664 |
| 10/1/2013 17:30 | 0 | 264.4152192 | 264.4179728 | 264.415048 | 264.406664 | 264.3857664 |
| 10/1/2013 17:40 | 0 | 264.4146096 | 264.4149728 | 264.413048 | 264.406664 | 264.3857664 |
| 10/1/2013 17:50 | 0 | 264.4143048 | 264.4199728 | 264.416048 | 264.407664 | 264.3867664 |
| 10/1/2013 18:00 | 0 | 264.415524  | 264.4169728 | 264.412048 | 264.406664 | 264.3857664 |
| 10/1/2013 18:10 | 0 | 264.4152192 | 264.4169728 | 264.415048 | 264.404664 | 264.3847664 |
| 10/1/2013 18:20 | 0 | 264.4143048 | 264.4199728 | 264.416048 | 264.407664 | 264.3887664 |
| 10/1/2013 18:30 | 0 | 264.4161336 | 264.4199728 | 264.413048 | 264.404664 | 264.3847664 |
| 10/1/2013 18:40 | 0 | 264.4161336 | 264.4169728 | 264.412048 | 264.404664 | 264.3857664 |
| 10/1/2013 18:50 | 0 | 264.4164384 | 264.4199728 | 264.415048 | 264.406664 | 264.3877664 |
| 10/1/2013 19:00 | 0 | 264.417048  | 264.4209728 | 264.415048 | 264.406664 | 264.3887664 |
| 10/1/2013 19:10 | 0 | 264.4173528 | 264.4169728 | 264.415048 | 264.403664 | 264.3877664 |
| 10/1/2013 19:20 | 0 | 264.4188768 | 264.4249728 | 264.413048 | 264.405664 | 264.3887664 |
| 10/1/2013 19:30 | 0 | 264.4197912 | 264.4209728 | 264.415048 | 264.404664 | 264.3887664 |
| 10/1/2013 19:40 | 0 | 264.4204008 | 264.4229728 | 264.415048 | 264.404664 | 264.3887664 |
| 10/1/2013 19:50 | 0 | 264.4213152 | 264.4249728 | 264.413048 | 264.403664 | 264.3907664 |
| 10/1/2013 20:00 | 0 | 264.4222296 | 264.4269728 | 264.416048 | 264.403664 | 264.3927664 |
| 10/1/2013 20:10 | 0 | 264.4234488 | 264.4269728 | 264.416048 | 264.402664 | 264.3927664 |
| 10/1/2013 20:20 | 0 | 264.4240584 | 264.4269728 | 264.419048 | 264.403664 | 264.3947664 |
| 10/1/2013 20:30 | 0 | 264.4249728 | 264.4259728 | 264.420048 | 264.404664 | 264.3927664 |
| 10/1/2013 20:40 | 0 | 264.4258872 | 264.4309728 | 264.418048 | 264.402664 | 264.3947664 |
| 10/1/2013 20:50 | 0 | 264.4271064 | 264.4319728 | 264.418048 | 264.404664 | 264.3967664 |
| 10/1/2013 21:00 | 0 | 264.4283256 | 264.4349728 | 264.423048 | 264.405664 | 264.3997664 |
| 10/1/2013 21:10 | 0 | 264.4295448 | 264.4339728 | 264.421048 | 264.404664 | 264.3987664 |
| 10/1/2013 21:20 | 0 | 264.4304592 | 264.4359728 | 264.424048 | 264.404664 | 264.4007664 |
| 10/1/2013 21:30 | 0 | 264.4310688 | 264.4359728 | 264.424048 | 264.403664 | 264.3987664 |
| 10/1/2013 21:40 | 0 | 264.4316784 | 264.4389728 | 264.424048 | 264.403664 | 264.4007664 |
| 10/1/2013 21:50 | 0 | 264.4325928 | 264.4379728 | 264.425048 | 264.403664 | 264.4027664 |
| 10/1/2013 22:00 | 0 | 264.433812  | 264.4399728 | 264.426048 | 264.404664 | 264.4027664 |
| 10/1/2013 22:10 | 0 | 264.4347264 | 264.4409728 | 264.429048 | 264.404664 | 264.4017664 |
| 10/1/2013 22:20 | 0 | 264.435336  | 264.4409728 | 264.429048 | 264.405664 | 264.4037664 |
| 10/1/2013 22:30 | 0 | 264.4359456 | 264.4409728 | 264.430048 | 264.404664 | 264.4047664 |
| 10/1/2013 22:40 | 0 | 264.4362504 | 264.4399728 | 264.429048 | 264.404664 | 264.4027664 |
| 10/1/2013 22:50 | 0 | 264.4371648 | 264.4399728 | 264.432048 | 264.406664 | 264.4027664 |
| 10/1/2013 23:00 | 0 | 264.4374696 | 264.4419728 | 264.432048 | 264.404664 | 264.4067664 |
| 10/1/2013 23:10 | 0 | 264.4377744 | 264.4399728 | 264.432048 | 264.404664 | 264.4067664 |

|                 |   |             |             |            |            |             |
|-----------------|---|-------------|-------------|------------|------------|-------------|
| 10/1/2013 23:20 | 0 | 264.4380792 | 264.4389728 | 264.433048 | 264.402664 | 264.4047664 |
| 10/1/2013 23:30 | 0 | 264.4374696 | 264.4389728 | 264.434048 | 264.404664 | 264.4067664 |
| 10/1/2013 23:40 | 0 | 264.43686   | 264.4399728 | 264.437048 | 264.406664 | 264.4087664 |
| 10/1/2013 23:50 | 0 | 264.4356408 | 264.4359728 | 264.434048 | 264.405664 | 264.4057664 |
| 10/2/2013 0:00  | 0 | 264.4344216 | 264.4319728 | 264.433048 | 264.401664 | 264.4037664 |
| 10/2/2013 0:10  | 0 | 264.4328976 | 264.4289728 | 264.430048 | 264.403664 | 264.4037664 |
| 10/2/2013 0:20  | 0 | 264.4313736 | 264.4279728 | 264.432048 | 264.403664 | 264.4037664 |
| 10/2/2013 0:30  | 0 | 264.4301544 | 264.4259728 | 264.430048 | 264.403664 | 264.4027664 |
| 10/2/2013 0:40  | 0 | 264.4280208 | 264.4199728 | 264.429048 | 264.399664 | 264.3977664 |
| 10/2/2013 0:50  | 0 | 264.4264968 | 264.4219728 | 264.430048 | 264.406664 | 264.3997664 |
| 10/2/2013 1:00  | 0 | 264.4249728 | 264.4179728 | 264.427048 | 264.404664 | 264.3997664 |
| 10/2/2013 1:10  | 0 | 264.423144  | 264.4169728 | 264.427048 | 264.402664 | 264.3997664 |
| 10/2/2013 1:20  | 0 | 264.4210104 | 264.4109728 | 264.425048 | 264.401664 | 264.3947664 |
| 10/2/2013 1:30  | 0 | 264.4210104 | 264.4169728 | 264.425048 | 264.403664 | 264.3967664 |
| 10/2/2013 1:40  | 0 | 264.418572  | 264.4109728 | 264.421048 | 264.400664 | 264.3937664 |
| 10/2/2013 1:50  | 0 | 264.4164384 | 264.4029728 | 264.421048 | 264.400664 | 264.3927664 |
| 10/2/2013 2:00  | 0 | 264.415524  | 264.4029728 | 264.419048 | 264.404664 | 264.3937664 |
| 10/2/2013 2:10  | 0 | 264.4136952 | 264.4089728 | 264.418048 | 264.403664 | 264.3917664 |
| 10/2/2013 2:20  | 0 | 264.410952  | 264.4029728 | 264.415048 | 264.402664 | 264.3887664 |
| 10/2/2013 2:30  | 0 | 264.4088184 | 264.3999728 | 264.415048 | 264.404664 | 264.3877664 |
| 10/2/2013 2:40  | 0 | 264.40638   | 264.3949728 | 264.412048 | 264.404664 | 264.3857664 |
| 10/2/2013 2:50  | 0 | 264.404856  | 264.3899728 | 264.410048 | 264.402664 | 264.3857664 |
| 10/2/2013 3:00  | 0 | 264.403332  | 264.3849728 | 264.408048 | 264.400664 | 264.3837664 |
| 10/2/2013 3:10  | 0 | 264.4024176 | 264.3919728 | 264.407048 | 264.404664 | 264.3827664 |
| 10/2/2013 3:20  | 0 | 264.4011984 | 264.3949728 | 264.406048 | 264.404664 | 264.3837664 |
| 10/2/2013 3:30  | 0 | 264.3999792 | 264.3899728 | 264.402048 | 264.402664 | 264.3827664 |
| 10/2/2013 3:40  | 0 | 264.3999792 | 264.3869728 | 264.403048 | 264.402664 | 264.3807664 |
| 10/2/2013 3:50  | 0 | 264.4008936 | 264.3929728 | 264.402048 | 264.404664 | 264.3817664 |
| 10/2/2013 4:00  | 0 | 264.3999792 | 264.3929728 | 264.402048 | 264.404664 | 264.3817664 |
| 10/2/2013 4:10  | 0 | 264.3984552 | 264.3929728 | 264.400048 | 264.405664 | 264.3817664 |
| 10/2/2013 4:20  | 0 | 264.397236  | 264.3849728 | 264.398048 | 264.404664 | 264.3807664 |
| 10/2/2013 4:30  | 0 | 264.3969312 | 264.3869728 | 264.396048 | 264.402664 | 264.3787664 |
| 10/2/2013 4:40  | 0 | 264.3951024 | 264.3849728 | 264.395048 | 264.404664 | 264.3787664 |
| 10/2/2013 4:50  | 0 | 264.3932736 | 264.3819728 | 264.392048 | 264.401664 | 264.3727664 |
| 10/2/2013 5:00  | 0 | 264.3929688 | 264.3789728 | 264.391048 | 264.404664 | 264.3757664 |
| 10/2/2013 5:10  | 0 | 264.3920544 | 264.3819728 | 264.391048 | 264.403664 | 264.3747664 |
| 10/2/2013 5:20  | 0 | 264.3908352 | 264.3819728 | 264.391048 | 264.401664 | 264.3727664 |
| 10/2/2013 5:30  | 0 | 264.3908352 | 264.3819728 | 264.391048 | 264.403664 | 264.3727664 |
| 10/2/2013 5:40  | 0 | 264.39114   | 264.3829728 | 264.391048 | 264.404664 | 264.3757664 |
| 10/2/2013 5:50  | 0 | 264.3914448 | 264.3849728 | 264.389048 | 264.404664 | 264.3747664 |
| 10/2/2013 6:00  | 0 | 264.3920544 | 264.3839728 | 264.387048 | 264.400664 | 264.3727664 |
| 10/2/2013 6:10  | 0 | 264.3914448 | 264.3839728 | 264.388048 | 264.401664 | 264.3747664 |
| 10/2/2013 6:20  | 0 | 264.3908352 | 264.3829728 | 264.385048 | 264.402664 | 264.3717664 |
| 10/2/2013 6:30  | 0 | 264.3908352 | 264.3829728 | 264.383048 | 264.397664 | 264.3707664 |
| 10/2/2013 6:40  | 0 | 264.39114   | 264.3839728 | 264.384048 | 264.400664 | 264.3737664 |
| 10/2/2013 6:50  | 0 | 264.3923592 | 264.3849728 | 264.384048 | 264.399664 | 264.3707664 |
| 10/2/2013 7:00  | 0 | 264.3938832 | 264.3879728 | 264.384048 | 264.400664 | 264.3737664 |

|                 |   |             |             |            |            |             |
|-----------------|---|-------------|-------------|------------|------------|-------------|
| 10/2/2013 7:10  | 0 | 264.395712  | 264.3909728 | 264.384048 | 264.400664 | 264.3737664 |
| 10/2/2013 7:20  | 0 | 264.3978456 | 264.3959728 | 264.385048 | 264.400664 | 264.3767664 |
| 10/2/2013 7:30  | 0 | 264.4027224 | 264.4019728 | 264.387048 | 264.404664 | 264.3807664 |
| 10/2/2013 7:40  | 0 | 264.404856  | 264.4069728 | 264.388048 | 264.400664 | 264.3807664 |
| 10/2/2013 7:50  | 0 | 264.4069896 | 264.4069728 | 264.391048 | 264.402664 | 264.3837664 |
| 10/2/2013 8:00  | 0 | 264.409428  | 264.4119728 | 264.394048 | 264.400664 | 264.3857664 |
| 10/2/2013 8:10  | 0 | 264.4121712 | 264.4169728 | 264.395048 | 264.402664 | 264.3857664 |
| 10/2/2013 8:20  | 0 | 264.415524  | 264.4189728 | 264.396048 | 264.400664 | 264.3857664 |
| 10/2/2013 8:30  | 0 | 264.4188768 | 264.4269728 | 264.400048 | 264.400664 | 264.3907664 |
| 10/2/2013 8:40  | 0 | 264.4222296 | 264.4299728 | 264.399048 | 264.396664 | 264.3917664 |
| 10/2/2013 8:50  | 0 | 264.4252776 | 264.4359728 | 264.406048 | 264.402664 | 264.3947664 |
| 10/2/2013 9:00  | 0 | 264.4280208 | 264.4359728 | 264.407048 | 264.401664 | 264.3947664 |
| 10/2/2013 9:10  | 0 | 264.4304592 | 264.4409728 | 264.411048 | 264.399664 | 264.3997664 |
| 10/2/2013 9:20  | 0 | 264.4316784 | 264.4389728 | 264.415048 | 264.402664 | 264.3997664 |
| 10/2/2013 9:30  | 0 | 264.4347264 | 264.4459728 | 264.418048 | 264.398664 | 264.4017664 |
| 10/2/2013 9:40  | 0 | 264.4374696 | 264.4519728 | 264.420048 | 264.399664 | 264.4027664 |
| 10/2/2013 9:50  | 0 | 264.4386888 | 264.4519728 | 264.426048 | 264.400664 | 264.4057664 |
| 10/2/2013 10:00 | 0 | 264.4402128 | 264.4499728 | 264.427048 | 264.399664 | 264.4057664 |
| 10/2/2013 10:10 | 0 | 264.4411272 | 264.4489728 | 264.430048 | 264.399664 | 264.4057664 |
| 10/2/2013 10:20 | 0 | 264.4396032 | 264.4419728 | 264.430048 | 264.399664 | 264.4057664 |
| 10/2/2013 10:30 | 0 | 264.4396032 | 264.4439728 | 264.433048 | 264.400664 | 264.4037664 |
| 10/2/2013 10:40 | 0 | 264.4389936 | 264.4429728 | 264.434048 | 264.402664 | 264.4057664 |
| 10/2/2013 10:50 | 0 | 264.4396032 | 264.4449728 | 264.434048 | 264.401664 | 264.4037664 |
| 10/2/2013 11:00 | 0 | 264.4389936 | 264.4429728 | 264.437048 | 264.401664 | 264.4047664 |
| 10/2/2013 11:10 | 0 | 264.4386888 | 264.4389728 | 264.435048 | 264.402664 | 264.4027664 |
| 10/2/2013 11:20 | 0 | 264.4389936 | 264.4409728 | 264.433048 | 264.401664 | 264.4017664 |
| 10/2/2013 11:30 | 0 | 264.4374696 | 264.4409728 | 264.436048 | 264.402664 | 264.4027664 |
| 10/2/2013 11:40 | 0 | 264.4356408 | 264.4319728 | 264.436048 | 264.400664 | 264.4007664 |
| 10/2/2013 11:50 | 0 | 264.4350312 | 264.4339728 | 264.434048 | 264.402664 | 264.3977664 |
| 10/2/2013 12:00 | 0 | 264.432288  | 264.4289728 | 264.433048 | 264.400664 | 264.3977664 |
| 10/2/2013 12:10 | 0 | 264.4301544 | 264.4239728 | 264.433048 | 264.400664 | 264.3957664 |
| 10/2/2013 12:20 | 0 | 264.4301544 | 264.4289728 | 264.432048 | 264.401664 | 264.3987664 |
| 10/2/2013 12:30 | 0 | 264.4286304 | 264.4269728 | 264.432048 | 264.401664 | 264.3947664 |
| 10/2/2013 12:40 | 0 | 264.4271064 | 264.4219728 | 264.430048 | 264.402664 | 264.3947664 |
| 10/2/2013 12:50 | 0 | 264.4271064 | 264.4249728 | 264.430048 | 264.400664 | 264.3937664 |
| 10/2/2013 13:00 | 0 | 264.4249728 | 264.4179728 | 264.428048 | 264.400664 | 264.3917664 |
| 10/2/2013 13:10 | 0 | 264.424668  | 264.4209728 | 264.428048 | 264.400664 | 264.3917664 |
| 10/2/2013 13:20 | 0 | 264.4225344 | 264.4219728 | 264.429048 | 264.402664 | 264.3907664 |
| 10/2/2013 13:30 | 0 | 264.4213152 | 264.4139728 | 264.427048 | 264.400664 | 264.3877664 |
| 10/2/2013 13:40 | 0 | 264.4207056 | 264.4209728 | 264.425048 | 264.401664 | 264.3907664 |
| 10/2/2013 13:50 | 0 | 264.4194864 | 264.4129728 | 264.424048 | 264.399664 | 264.3847664 |
| 10/2/2013 14:00 | 0 | 264.4207056 | 264.4239728 | 264.424048 | 264.402664 | 264.3897664 |
| 10/2/2013 14:10 | 0 | 264.4197912 | 264.4179728 | 264.426048 | 264.403664 | 264.3907664 |
| 10/2/2013 14:20 | 0 | 264.4207056 | 264.4229728 | 264.423048 | 264.401664 | 264.3887664 |
| 10/2/2013 14:30 | 0 | 264.420096  | 264.4199728 | 264.423048 | 264.400664 | 264.3867664 |
| 10/2/2013 14:40 | 0 | 264.420096  | 264.4179728 | 264.419048 | 264.399664 | 264.3847664 |
| 10/2/2013 14:50 | 0 | 264.4179624 | 264.4149728 | 264.420048 | 264.400664 | 264.3867664 |

|                 |   |             |             |            |            |             |
|-----------------|---|-------------|-------------|------------|------------|-------------|
| 10/2/2013 15:00 | 0 | 264.418572  | 264.4179728 | 264.422048 | 264.402664 | 264.3867664 |
| 10/2/2013 15:10 | 0 | 264.4164384 | 264.4159728 | 264.421048 | 264.403664 | 264.3857664 |
| 10/2/2013 15:20 | 0 | 264.4173528 | 264.4169728 | 264.419048 | 264.399664 | 264.3847664 |
| 10/2/2013 15:30 | 0 | 264.4152192 | 264.4149728 | 264.421048 | 264.402664 | 264.3847664 |
| 10/2/2013 15:40 | 0 | 264.4133904 | 264.4069728 | 264.417048 | 264.398664 | 264.3817664 |
| 10/2/2013 15:50 | 0 | 264.4149144 | 264.4149728 | 264.417048 | 264.398664 | 264.3837664 |
| 10/2/2013 16:00 | 0 | 264.4143048 | 264.4179728 | 264.418048 | 264.401664 | 264.3827664 |
| 10/2/2013 16:10 | 0 | 264.4133904 | 264.4099728 | 264.417048 | 264.399664 | 264.3827664 |
| 10/2/2013 16:20 | 0 | 264.4143048 | 264.4129728 | 264.415048 | 264.399664 | 264.3837664 |
| 10/2/2013 16:30 | 0 | 264.414     | 264.4159728 | 264.417048 | 264.400664 | 264.3837664 |
| 10/2/2013 16:40 | 0 | 264.4127808 | 264.4129728 | 264.414048 | 264.400664 | 264.3807664 |
| 10/2/2013 16:50 | 0 | 264.412476  | 264.4069728 | 264.414048 | 264.398664 | 264.3817664 |
| 10/2/2013 17:00 | 0 | 264.414     | 264.4149728 | 264.416048 | 264.400664 | 264.3837664 |
| 10/2/2013 17:10 | 0 | 264.4133904 | 264.4169728 | 264.414048 | 264.400664 | 264.3837664 |
| 10/2/2013 17:20 | 0 | 264.4121712 | 264.4099728 | 264.413048 | 264.400664 | 264.3837664 |
| 10/2/2013 17:30 | 0 | 264.4127808 | 264.4099728 | 264.413048 | 264.400664 | 264.3817664 |
| 10/2/2013 17:40 | 0 | 264.4146096 | 264.4149728 | 264.413048 | 264.400664 | 264.3817664 |
| 10/2/2013 17:50 | 0 | 264.4143048 | 264.4179728 | 264.413048 | 264.403664 | 264.3827664 |
| 10/2/2013 18:00 | 0 | 264.4127808 | 264.4129728 | 264.413048 | 264.401664 | 264.3827664 |
| 10/2/2013 18:10 | 0 | 264.4143048 | 264.4099728 | 264.412048 | 264.400664 | 264.3837664 |
| 10/2/2013 18:20 | 0 | 264.4146096 | 264.4169728 | 264.413048 | 264.401664 | 264.3847664 |
| 10/2/2013 18:30 | 0 | 264.414     | 264.4149728 | 264.412048 | 264.399664 | 264.3817664 |
| 10/2/2013 18:40 | 0 | 264.4161336 | 264.4179728 | 264.414048 | 264.403664 | 264.3847664 |
| 10/2/2013 18:50 | 0 | 264.4179624 | 264.4249728 | 264.416048 | 264.402664 | 264.3877664 |
| 10/2/2013 19:00 | 0 | 264.4164384 | 264.4169728 | 264.413048 | 264.401664 | 264.3847664 |
| 10/2/2013 19:10 | 0 | 264.4197912 | 264.4269728 | 264.413048 | 264.399664 | 264.3867664 |
| 10/2/2013 19:20 | 0 | 264.4194864 | 264.4199728 | 264.413048 | 264.401664 | 264.3867664 |
| 10/2/2013 19:30 | 0 | 264.4213152 | 264.4229728 | 264.414048 | 264.399664 | 264.3877664 |
| 10/2/2013 19:40 | 0 | 264.4213152 | 264.4259728 | 264.416048 | 264.401664 | 264.3907664 |
| 10/2/2013 19:50 | 0 | 264.4240584 | 264.4299728 | 264.417048 | 264.401664 | 264.3927664 |
| 10/2/2013 20:00 | 0 | 264.4252776 | 264.4329728 | 264.418048 | 264.402664 | 264.3907664 |
| 10/2/2013 20:10 | 0 | 264.4258872 | 264.4279728 | 264.420048 | 264.401664 | 264.3927664 |
| 10/2/2013 20:20 | 0 | 264.427716  | 264.4329728 | 264.421048 | 264.401664 | 264.3947664 |
| 10/2/2013 20:30 | 0 | 264.4286304 | 264.4349728 | 264.421048 | 264.403664 | 264.3967664 |
| 10/2/2013 20:40 | 0 | 264.42924   | 264.4329728 | 264.420048 | 264.400664 | 264.3947664 |
| 10/2/2013 20:50 | 0 | 264.4304592 | 264.4349728 | 264.422048 | 264.401664 | 264.3967664 |
| 10/2/2013 21:00 | 0 | 264.4316784 | 264.4379728 | 264.425048 | 264.401664 | 264.3987664 |
| 10/2/2013 21:10 | 0 | 264.4328976 | 264.4399728 | 264.424048 | 264.400664 | 264.3987664 |
| 10/2/2013 21:20 | 0 | 264.433812  | 264.4369728 | 264.426048 | 264.402664 | 264.4007664 |
| 10/2/2013 21:30 | 0 | 264.4344216 | 264.4399728 | 264.426048 | 264.401664 | 264.4017664 |
| 10/2/2013 21:40 | 0 | 264.4347264 | 264.4399728 | 264.429048 | 264.401664 | 264.4017664 |
| 10/2/2013 21:50 | 0 | 264.4362504 | 264.4419728 | 264.430048 | 264.400664 | 264.4017664 |
| 10/2/2013 22:00 | 0 | 264.4377744 | 264.4429728 | 264.432048 | 264.400664 | 264.4037664 |
| 10/2/2013 22:10 | 0 | 264.4386888 | 264.4449728 | 264.432048 | 264.401664 | 264.4057664 |
| 10/2/2013 22:20 | 0 | 264.4396032 | 264.4429728 | 264.432048 | 264.400664 | 264.4057664 |
| 10/2/2013 22:30 | 0 | 264.4405176 | 264.4459728 | 264.434048 | 264.401664 | 264.4087664 |
| 10/2/2013 22:40 | 0 | 264.4411272 | 264.4449728 | 264.434048 | 264.402664 | 264.4087664 |

|                 |   |             |             |            |            |             |
|-----------------|---|-------------|-------------|------------|------------|-------------|
| 10/2/2013 22:50 | 0 | 264.4411272 | 264.4439728 | 264.434048 | 264.402664 | 264.4077664 |
| 10/2/2013 23:00 | 0 | 264.4408224 | 264.4439728 | 264.436048 | 264.404664 | 264.4097664 |
| 10/2/2013 23:10 | 0 | 264.4405176 | 264.4429728 | 264.436048 | 264.403664 | 264.4067664 |
| 10/2/2013 23:20 | 0 | 264.439908  | 264.4409728 | 264.437048 | 264.403664 | 264.4087664 |
| 10/2/2013 23:30 | 0 | 264.4392984 | 264.4389728 | 264.436048 | 264.402664 | 264.4057664 |
| 10/2/2013 23:40 | 0 | 264.438384  | 264.4379728 | 264.436048 | 264.402664 | 264.4057664 |
| 10/2/2013 23:50 | 0 | 264.4374696 | 264.4339728 | 264.433048 | 264.400664 | 264.4037664 |
| 10/3/2013 0:00  | 0 | 264.4362504 | 264.4329728 | 264.433048 | 264.403664 | 264.4067664 |
| 10/3/2013 0:10  | 0 | 264.4350312 | 264.4309728 | 264.435048 | 264.404664 | 264.4047664 |
| 10/3/2013 0:20  | 0 | 264.4328976 | 264.4269728 | 264.433048 | 264.401664 | 264.4027664 |
| 10/3/2013 0:30  | 0 | 264.4310688 | 264.4259728 | 264.433048 | 264.402664 | 264.4027664 |
| 10/3/2013 0:40  | 0 | 264.4295448 | 264.4229728 | 264.431048 | 264.402664 | 264.3997664 |
| 10/3/2013 0:50  | 0 | 264.427716  | 264.4179728 | 264.428048 | 264.402664 | 264.3977664 |
| 10/3/2013 1:00  | 0 | 264.4252776 | 264.4149728 | 264.429048 | 264.400664 | 264.3957664 |
| 10/3/2013 1:10  | 0 | 264.4264968 | 264.4199728 | 264.428048 | 264.400664 | 264.3977664 |
| 10/3/2013 1:20  | 0 | 264.4240584 | 264.4199728 | 264.427048 | 264.402664 | 264.3977664 |
| 10/3/2013 1:30  | 0 | 264.4225344 | 264.4099728 | 264.427048 | 264.400664 | 264.3957664 |
| 10/3/2013 1:40  | 0 | 264.4222296 | 264.4149728 | 264.424048 | 264.399664 | 264.3977664 |
| 10/3/2013 1:50  | 0 | 264.4194864 | 264.4119728 | 264.423048 | 264.400664 | 264.3937664 |
| 10/3/2013 2:00  | 0 | 264.4164384 | 264.4069728 | 264.421048 | 264.400664 | 264.3907664 |
| 10/3/2013 2:10  | 0 | 264.4146096 | 264.3979728 | 264.421048 | 264.402664 | 264.3927664 |
| 10/3/2013 2:20  | 0 | 264.4146096 | 264.4099728 | 264.416048 | 264.399664 | 264.3907664 |
| 10/3/2013 2:30  | 0 | 264.4106472 | 264.4029728 | 264.419048 | 264.403664 | 264.3917664 |
| 10/3/2013 2:40  | 0 | 264.407904  | 264.3949728 | 264.416048 | 264.402664 | 264.3867664 |
| 10/3/2013 2:50  | 0 | 264.4069896 | 264.3929728 | 264.416048 | 264.403664 | 264.3897664 |
| 10/3/2013 3:00  | 0 | 264.4057704 | 264.3929728 | 264.412048 | 264.401664 | 264.3847664 |
| 10/3/2013 3:10  | 0 | 264.4042464 | 264.3959728 | 264.410048 | 264.400664 | 264.3857664 |
| 10/3/2013 3:20  | 0 | 264.4021128 | 264.3919728 | 264.410048 | 264.403664 | 264.3857664 |
| 10/3/2013 3:30  | 0 | 264.4015032 | 264.3889728 | 264.406048 | 264.400664 | 264.3837664 |
| 10/3/2013 3:40  | 0 | 264.4005888 | 264.3859728 | 264.403048 | 264.400664 | 264.3787664 |
| 10/3/2013 3:50  | 0 | 264.4005888 | 264.3889728 | 264.403048 | 264.399664 | 264.3807664 |
| 10/3/2013 4:00  | 0 | 264.3984552 | 264.3889728 | 264.402048 | 264.402664 | 264.3807664 |
| 10/3/2013 4:10  | 0 | 264.3975408 | 264.3839728 | 264.400048 | 264.400664 | 264.3787664 |
| 10/3/2013 4:20  | 0 | 264.3978456 | 264.3909728 | 264.398048 | 264.399664 | 264.3777664 |
| 10/3/2013 4:30  | 0 | 264.3951024 | 264.3769728 | 264.396048 | 264.400664 | 264.3737664 |
| 10/3/2013 4:40  | 0 | 264.3947976 | 264.3839728 | 264.396048 | 264.399664 | 264.3767664 |
| 10/3/2013 4:50  | 0 | 264.3932736 | 264.3799728 | 264.394048 | 264.401664 | 264.3767664 |
| 10/3/2013 5:00  | 0 | 264.3944928 | 264.3849728 | 264.394048 | 264.399664 | 264.3747664 |
| 10/3/2013 5:10  | 0 | 264.3917496 | 264.3799728 | 264.392048 | 264.402664 | 264.3747664 |
| 10/3/2013 5:20  | 0 | 264.3914448 | 264.3799728 | 264.394048 | 264.402664 | 264.3737664 |
| 10/3/2013 5:30  | 0 | 264.3908352 | 264.3779728 | 264.390048 | 264.399664 | 264.3727664 |
| 10/3/2013 5:40  | 0 | 264.3905304 | 264.3779728 | 264.387048 | 264.397664 | 264.3707664 |
| 10/3/2013 5:50  | 0 | 264.3908352 | 264.3819728 | 264.390048 | 264.399664 | 264.3707664 |
| 10/3/2013 6:00  | 0 | 264.3899208 | 264.3809728 | 264.390048 | 264.400664 | 264.3727664 |
| 10/3/2013 6:10  | 0 | 264.389616  | 264.3809728 | 264.388048 | 264.400664 | 264.3727664 |
| 10/3/2013 6:20  | 0 | 264.389616  | 264.3799728 | 264.387048 | 264.399664 | 264.3707664 |
| 10/3/2013 6:30  | 0 | 264.3914448 | 264.3889728 | 264.388048 | 264.401664 | 264.3737664 |

|                 |        |             |             |            |            |             |
|-----------------|--------|-------------|-------------|------------|------------|-------------|
| 10/3/2013 6:40  | 0      | 264.3908352 | 264.3829728 | 264.384048 | 264.398664 | 264.3707664 |
| 10/3/2013 6:50  | 0      | 264.3920544 | 264.3859728 | 264.386048 | 264.399664 | 264.3727664 |
| 10/3/2013 7:00  | 0      | 264.3944928 | 264.3899728 | 264.386048 | 264.399664 | 264.3747664 |
| 10/3/2013 7:10  | 0.0254 | 264.3981504 | 264.4009728 | 264.387048 | 264.401664 | 264.3797664 |
| 10/3/2013 7:20  | 0.1778 | 264.4036368 | 264.4009728 | 264.386048 | 264.397664 | 264.3797664 |
| 10/3/2013 7:30  | 0.1778 | 264.4057704 | 264.4009728 | 264.388048 | 264.397664 | 264.3797664 |
| 10/3/2013 7:40  | 0.1778 | 264.407904  | 264.4079728 | 264.391048 | 264.399664 | 264.3837664 |
| 10/3/2013 7:50  | 0.1778 | 264.4106472 | 264.4139728 | 264.393048 | 264.400664 | 264.3857664 |
| 10/3/2013 8:00  | 0.1778 | 264.4143048 | 264.4199728 | 264.397048 | 264.400664 | 264.3887664 |
| 10/3/2013 8:10  | 0.1778 | 264.4176576 | 264.4239728 | 264.397048 | 264.400664 | 264.3897664 |
| 10/3/2013 8:20  | 0.1778 | 264.4210104 | 264.4289728 | 264.401048 | 264.402664 | 264.3927664 |
| 10/3/2013 8:30  | 0.1778 | 264.4249728 | 264.4329728 | 264.405048 | 264.401664 | 264.3967664 |
| 10/3/2013 8:40  | 0.1778 | 264.4341168 | 264.4579728 | 264.409048 | 264.401664 | 264.4057664 |
| 10/3/2013 8:50  | 0.1778 | 264.456672  | 264.5129728 | 264.419048 | 264.400664 | 264.4247664 |
| 10/3/2013 9:00  | 0.1778 | 264.4801416 | 264.5549728 | 264.444048 | 264.401664 | 264.4477664 |
| 10/3/2013 9:10  | 0.1778 | 264.496296  | 264.5599728 | 264.464048 | 264.400664 | 264.4537664 |
| 10/3/2013 9:20  | 0.1778 | 264.5051352 | 264.5539728 | 264.481048 | 264.401664 | 264.4587664 |
| 10/3/2013 9:30  | 0.1778 | 264.508488  | 264.5439728 | 264.492048 | 264.401664 | 264.4567664 |
| 10/3/2013 9:40  | 0.1778 | 264.5081832 | 264.5349728 | 264.503048 | 264.404664 | 264.4577664 |
| 10/3/2013 9:50  | 0.1778 | 264.5063544 | 264.5209728 | 264.504048 | 264.403664 | 264.4507664 |
| 10/3/2013 10:00 | 0.1778 | 264.5045256 | 264.5159728 | 264.507048 | 264.401664 | 264.4507664 |
| 10/3/2013 10:10 | 0.1778 | 264.4996488 | 264.5069728 | 264.507048 | 264.404664 | 264.4467664 |
| 10/3/2013 10:20 | 0.1778 | 264.4953816 | 264.4929728 | 264.503048 | 264.403664 | 264.4447664 |
| 10/3/2013 10:30 | 0.1778 | 264.4926384 | 264.4929728 | 264.504048 | 264.403664 | 264.4447664 |
| 10/3/2013 10:40 | 0.1778 | 264.4895904 | 264.4919728 | 264.503048 | 264.405664 | 264.4427664 |
| 10/3/2013 10:50 | 0.1778 | 264.4865424 | 264.4869728 | 264.500048 | 264.407664 | 264.4417664 |
| 10/3/2013 11:00 | 0.1778 | 264.4837992 | 264.4849728 | 264.497048 | 264.406664 | 264.4407664 |
| 10/3/2013 11:10 | 0.1778 | 264.4813608 | 264.4779728 | 264.495048 | 264.405664 | 264.4397664 |
| 10/3/2013 11:20 | 0.1778 | 264.4786176 | 264.4779728 | 264.492048 | 264.407664 | 264.4387664 |
| 10/3/2013 11:30 | 0.1778 | 264.4746552 | 264.4689728 | 264.488048 | 264.407664 | 264.4377664 |
| 10/3/2013 11:40 | 0.1778 | 264.4725216 | 264.4659728 | 264.488048 | 264.405664 | 264.4367664 |
| 10/3/2013 11:50 | 0.1778 | 264.4706928 | 264.4689728 | 264.485048 | 264.406664 | 264.4357664 |
| 10/3/2013 12:00 | 0.1778 | 264.4676448 | 264.4609728 | 264.481048 | 264.406664 | 264.4307664 |
| 10/3/2013 12:10 | 0.1778 | 264.4655112 | 264.4599728 | 264.479048 | 264.409664 | 264.4337664 |
| 10/3/2013 12:20 | 0.1778 | 264.4621584 | 264.4549728 | 264.475048 | 264.407664 | 264.4297664 |
| 10/3/2013 12:30 | 0.1778 | 264.45972   | 264.4499728 | 264.472048 | 264.408664 | 264.4277664 |
| 10/3/2013 12:40 | 0.1778 | 264.458196  | 264.4529728 | 264.469048 | 264.408664 | 264.4267664 |
| 10/3/2013 12:50 | 0.1778 | 264.4554528 | 264.4459728 | 264.467048 | 264.406664 | 264.4247664 |
| 10/3/2013 13:00 | 0.1778 | 264.453624  | 264.4439728 | 264.463048 | 264.408664 | 264.4217664 |
| 10/3/2013 13:10 | 0.1778 | 264.4530144 | 264.4479728 | 264.461048 | 264.409664 | 264.4237664 |
| 10/3/2013 13:20 | 0.1778 | 264.4514904 | 264.4459728 | 264.460048 | 264.409664 | 264.4227664 |
| 10/3/2013 13:30 | 0.1778 | 264.4508808 | 264.4449728 | 264.457048 | 264.408664 | 264.4227664 |
| 10/3/2013 13:40 | 0.1778 | 264.4517952 | 264.4489728 | 264.458048 | 264.410664 | 264.4237664 |
| 10/3/2013 13:50 | 0.1778 | 264.4524048 | 264.4499728 | 264.453048 | 264.408664 | 264.4207664 |
| 10/3/2013 14:00 | 0.1778 | 264.4517952 | 264.4499728 | 264.452048 | 264.409664 | 264.4207664 |
| 10/3/2013 14:10 | 0.1778 | 264.4530144 | 264.4509728 | 264.455048 | 264.409664 | 264.4237664 |
| 10/3/2013 14:20 | 0.1778 | 264.4545384 | 264.4569728 | 264.456048 | 264.410664 | 264.4227664 |



|                 |        |             |             |            |            |             |
|-----------------|--------|-------------|-------------|------------|------------|-------------|
| 10/3/2013 14:30 | 0.1778 | 264.4548432 | 264.4559728 | 264.453048 | 264.409664 | 264.4217664 |
| 10/3/2013 14:40 | 0.1778 | 264.4539288 | 264.4539728 | 264.452048 | 264.409664 | 264.4197664 |
| 10/3/2013 14:50 | 0.1778 | 264.4539288 | 264.4549728 | 264.454048 | 264.412664 | 264.4227664 |
| 10/3/2013 15:00 | 0.1778 | 264.4542336 | 264.4579728 | 264.455048 | 264.412664 | 264.4247664 |
| 10/3/2013 15:10 | 0.1778 | 264.4530144 | 264.4539728 | 264.455048 | 264.412664 | 264.4197664 |
| 10/3/2013 15:20 | 0.1778 | 264.4514904 | 264.4459728 | 264.454048 | 264.409664 | 264.4207664 |
| 10/3/2013 15:30 | 0.1778 | 264.4524048 | 264.4509728 | 264.451048 | 264.409664 | 264.4187664 |
| 10/3/2013 15:40 | 0.1778 | 264.450576  | 264.4489728 | 264.452048 | 264.409664 | 264.4167664 |
| 10/3/2013 15:50 | 0.1778 | 264.4496616 | 264.4449728 | 264.449048 | 264.411664 | 264.4157664 |
| 10/3/2013 16:00 | 0.1778 | 264.4496616 | 264.4459728 | 264.448048 | 264.410664 | 264.4157664 |
| 10/3/2013 16:10 | 0.1778 | 264.4487472 | 264.4459728 | 264.448048 | 264.408664 | 264.4157664 |
| 10/3/2013 16:20 | 0.1778 | 264.447528  | 264.4449728 | 264.448048 | 264.410664 | 264.4137664 |
| 10/3/2013 16:30 | 0.1778 | 264.4466136 | 264.4419728 | 264.448048 | 264.410664 | 264.4147664 |
| 10/3/2013 16:40 | 0.1778 | 264.4466136 | 264.4449728 | 264.447048 | 264.411664 | 264.4157664 |
| 10/3/2013 16:50 | 0.1778 | 264.4453944 | 264.4429728 | 264.447048 | 264.413664 | 264.4157664 |
| 10/3/2013 17:00 | 0.1778 | 264.4441752 | 264.4359728 | 264.445048 | 264.409664 | 264.4127664 |
| 10/3/2013 17:10 | 0.1778 | 264.4435656 | 264.4379728 | 264.443048 | 264.410664 | 264.4137664 |
| 10/3/2013 17:20 | 0.1778 | 264.4441752 | 264.4449728 | 264.443048 | 264.413664 | 264.4157664 |
| 10/3/2013 17:30 | 0.1778 | 264.442956  | 264.4389728 | 264.441048 | 264.410664 | 264.4127664 |
| 10/3/2013 17:40 | 0.1778 | 264.4423464 | 264.4369728 | 264.441048 | 264.410664 | 264.4137664 |
| 10/3/2013 17:50 | 0.1778 | 264.4435656 | 264.4419728 | 264.440048 | 264.408664 | 264.4127664 |
| 10/3/2013 18:00 | 0.1778 | 264.4423464 | 264.4399728 | 264.441048 | 264.411664 | 264.4127664 |
| 10/3/2013 18:10 | 0.1778 | 264.441432  | 264.4349728 | 264.440048 | 264.412664 | 264.4107664 |
| 10/3/2013 18:20 | 0.1778 | 264.4417368 | 264.4379728 | 264.442048 | 264.413664 | 264.4127664 |
| 10/3/2013 18:30 | 0.1778 | 264.4411272 | 264.4369728 | 264.436048 | 264.410664 | 264.4117664 |
| 10/3/2013 18:40 | 0.254  | 264.4402128 | 264.4369728 | 264.440048 | 264.413664 | 264.4137664 |
| 10/3/2013 18:50 | 0.254  | 264.4408224 | 264.4369728 | 264.440048 | 264.415664 | 264.4127664 |
| 10/3/2013 19:00 | 0.254  | 264.4417368 | 264.4419728 | 264.439048 | 264.415664 | 264.4157664 |
| 10/3/2013 19:10 | 0.254  | 264.4405176 | 264.4389728 | 264.439048 | 264.414664 | 264.4127664 |
| 10/3/2013 19:20 | 0.254  | 264.4420416 | 264.4419728 | 264.440048 | 264.412664 | 264.4147664 |
| 10/3/2013 19:30 | 0.254  | 264.4432608 | 264.4439728 | 264.437048 | 264.411664 | 264.4137664 |
| 10/3/2013 19:40 | 0.254  | 264.4420416 | 264.4389728 | 264.439048 | 264.409664 | 264.4117664 |
| 10/3/2013 19:50 | 0.254  | 264.4438704 | 264.4429728 | 264.436048 | 264.411664 | 264.4117664 |
| 10/3/2013 20:00 | 0.254  | 264.4435656 | 264.4429728 | 264.437048 | 264.411664 | 264.4117664 |
| 10/3/2013 20:10 | 0.254  | 264.4432608 | 264.4409728 | 264.439048 | 264.413664 | 264.4137664 |
| 10/3/2013 20:20 | 0.254  | 264.4450896 | 264.4439728 | 264.440048 | 264.414664 | 264.4147664 |
| 10/3/2013 20:30 | 0.254  | 264.4438704 | 264.4439728 | 264.439048 | 264.411664 | 264.4157664 |
| 10/3/2013 20:40 | 0.254  | 264.446004  | 264.4439728 | 264.440048 | 264.411664 | 264.4157664 |
| 10/3/2013 20:50 | 0.254  | 264.4447848 | 264.4409728 | 264.440048 | 264.413664 | 264.4157664 |
| 10/3/2013 21:00 | 0.254  | 264.4469184 | 264.4449728 | 264.438048 | 264.411664 | 264.4167664 |
| 10/3/2013 21:10 | 0.254  | 264.4478328 | 264.4479728 | 264.440048 | 264.411664 | 264.4187664 |
| 10/3/2013 21:20 | 0.254  | 264.4499664 | 264.4499728 | 264.440048 | 264.411664 | 264.4197664 |
| 10/3/2013 21:30 | 0.254  | 264.4511856 | 264.4529728 | 264.443048 | 264.414664 | 264.4227664 |
| 10/3/2013 21:40 | 0.254  | 264.4527096 | 264.4529728 | 264.441048 | 264.411664 | 264.4197664 |
| 10/3/2013 21:50 | 0.254  | 264.4539288 | 264.4549728 | 264.445048 | 264.412664 | 264.4227664 |
| 10/3/2013 22:00 | 0.254  | 264.4548432 | 264.4559728 | 264.447048 | 264.412664 | 264.4227664 |
| 10/3/2013 22:10 | 0.254  | 264.455148  | 264.4519728 | 264.446048 | 264.411664 | 264.4237664 |

|                 |        |             |             |            |            |             |
|-----------------|--------|-------------|-------------|------------|------------|-------------|
| 10/3/2013 22:20 | 0.254  | 264.455148  | 264.4519728 | 264.446048 | 264.413664 | 264.4237664 |
| 10/3/2013 22:30 | 0.254  | 264.4548432 | 264.4509728 | 264.446048 | 264.410664 | 264.4227664 |
| 10/3/2013 22:40 | 0.254  | 264.4554528 | 264.4549728 | 264.446048 | 264.413664 | 264.4257664 |
| 10/3/2013 22:50 | 0.254  | 264.455148  | 264.4579728 | 264.451048 | 264.417664 | 264.4267664 |
| 10/3/2013 23:00 | 0.254  | 264.455148  | 264.4549728 | 264.449048 | 264.414664 | 264.4247664 |
| 10/3/2013 23:10 | 0.254  | 264.4545384 | 264.4519728 | 264.448048 | 264.411664 | 264.4237664 |
| 10/3/2013 23:20 | 0.254  | 264.4539288 | 264.4519728 | 264.449048 | 264.413664 | 264.4237664 |
| 10/3/2013 23:30 | 0.254  | 264.4530144 | 264.4499728 | 264.448048 | 264.410664 | 264.4227664 |
| 10/3/2013 23:40 | 0.254  | 264.4514904 | 264.4479728 | 264.449048 | 264.415664 | 264.4257664 |
| 10/3/2013 23:50 | 0.254  | 264.4499664 | 264.4439728 | 264.448048 | 264.411664 | 264.4227664 |
| 10/4/2013 0:00  | 0.254  | 264.4487472 | 264.4459728 | 264.448048 | 264.414664 | 264.4237664 |
| 10/4/2013 0:10  | 0      | 264.4472232 | 264.4429728 | 264.447048 | 264.415664 | 264.4247664 |
| 10/4/2013 0:20  | 0.0508 | 264.4472232 | 264.4429728 | 264.447048 | 264.413664 | 264.4207664 |
| 10/4/2013 0:30  | 0.2032 | 264.4493568 | 264.4439728 | 264.445048 | 264.415664 | 264.4247664 |
| 10/4/2013 0:40  | 0.2286 | 264.4493568 | 264.4449728 | 264.447048 | 264.413664 | 264.4227664 |
| 10/4/2013 0:50  | 0.2286 | 264.4456992 | 264.4359728 | 264.445048 | 264.415664 | 264.4207664 |
| 10/4/2013 1:00  | 0.2286 | 264.4438704 | 264.4319728 | 264.441048 | 264.414664 | 264.4197664 |
| 10/4/2013 1:10  | 0.2286 | 264.442956  | 264.4359728 | 264.441048 | 264.416664 | 264.4197664 |
| 10/4/2013 1:20  | 0.2286 | 264.4396032 | 264.4309728 | 264.441048 | 264.414664 | 264.4167664 |
| 10/4/2013 1:30  | 0.2286 | 264.4377744 | 264.4229728 | 264.440048 | 264.413664 | 264.4157664 |
| 10/4/2013 1:40  | 0.2286 | 264.4371648 | 264.4299728 | 264.439048 | 264.415664 | 264.4157664 |
| 10/4/2013 1:50  | 0.2286 | 264.4356408 | 264.4259728 | 264.436048 | 264.416664 | 264.4157664 |
| 10/4/2013 2:00  | 0.2286 | 264.4380792 | 264.4289728 | 264.433048 | 264.415664 | 264.4117664 |
| 10/4/2013 2:10  | 0.2286 | 264.4578912 | 264.4759728 | 264.437048 | 264.417664 | 264.4297664 |
| 10/4/2013 2:20  | 0.2286 | 264.4731312 | 264.5019728 | 264.444048 | 264.416664 | 264.4387664 |
| 10/4/2013 2:30  | 0.2286 | 264.4837992 | 264.5049728 | 264.455048 | 264.417664 | 264.4447664 |
| 10/4/2013 2:40  | 0.2286 | 264.4902    | 264.5099728 | 264.464048 | 264.416664 | 264.4477664 |
| 10/4/2013 2:50  | 1.2446 | 264.491724  | 264.5059728 | 264.471048 | 264.416664 | 264.4427664 |
| 10/4/2013 3:00  | 1.8796 | 264.4975152 | 264.5169728 | 264.477048 | 264.417664 | 264.4547664 |
| 10/4/2013 3:10  | 1.905  | 264.5002584 | 264.5099728 | 264.481048 | 264.416664 | 264.4537664 |
| 10/4/2013 3:20  | 1.905  | 264.4972104 | 264.4989728 | 264.487048 | 264.418664 | 264.4517664 |
| 10/4/2013 3:30  | 1.905  | 264.5090976 | 264.5359728 | 264.491048 | 264.418664 | 264.4617664 |
| 10/4/2013 3:40  | 1.9304 | 264.5514648 | 264.6579728 | 264.510048 | 264.417664 | 264.5007664 |
| 10/4/2013 3:50  | 1.9304 | 264.6291888 | 264.7859728 | 264.554048 | 264.421664 | 264.5537664 |
| 10/4/2013 4:00  | 1.9304 | 264.7023408 | 264.8569728 | 264.614048 | 264.489664 | 264.5927664 |
| 10/4/2013 4:10  | 1.9304 | 264.7450128 | 264.8869728 | 264.676048 | 264.788664 | 264.6187664 |
| 10/4/2013 4:20  | 1.9304 | 264.7617768 | 264.8899728 | 264.726048 | 264.875664 | 264.6267664 |
| 10/4/2013 4:30  | 1.9304 | 264.7700064 | 264.8909728 | 264.764048 | 264.873664 | 264.6337664 |
| 10/4/2013 4:40  | 1.9304 | 264.7834176 | 264.8979728 | 264.791048 | 264.879664 | 264.6367664 |
| 10/4/2013 4:50  | 1.9304 | 264.8111544 | 264.9329728 | 264.820048 | 264.911664 | 264.6567664 |
| 10/4/2013 5:00  | 1.9304 | 264.8446824 | 264.9729728 | 264.850048 | 264.955664 | 264.6777664 |
| 10/4/2013 5:10  | 1.9304 | 264.8745528 | 265.0119728 | 264.884048 | 264.985664 | 264.7007664 |
| 10/4/2013 5:20  | 1.9304 | 264.8961936 | 265.0359728 | 264.916048 | 265.008664 | 264.7187664 |
| 10/4/2013 5:30  | 1.9304 | 264.9080808 | 265.0449728 | 264.942048 | 265.021664 | 264.7287664 |
| 10/4/2013 5:40  | 1.9304 | 264.9135672 | 265.0469728 | 264.969048 | 265.027664 | 264.7377664 |
| 10/4/2013 5:50  | 1.9304 | 264.9132624 | 265.0389728 | 264.983048 | 265.011664 | 264.7407664 |
| 10/4/2013 6:00  | 1.9304 | 264.9089952 | 265.0269728 | 264.992048 | 264.998664 | 264.7397664 |

|                 |        |             |             |            |            |             |
|-----------------|--------|-------------|-------------|------------|------------|-------------|
| 10/4/2013 6:10  | 1.9304 | 264.8992416 | 265.0089728 | 264.997048 | 264.984664 | 264.7387664 |
| 10/4/2013 6:20  | 1.9304 | 264.8891832 | 264.9899728 | 264.996048 | 264.970664 | 264.7357664 |
| 10/4/2013 6:30  | 1.9304 | 264.8782104 | 264.9649728 | 264.986048 | 264.947664 | 264.7267664 |
| 10/4/2013 6:40  | 1.9304 | 264.8660184 | 264.9499728 | 264.979048 | 264.947664 | 264.7217664 |
| 10/4/2013 6:50  | 2.4384 | 264.8553504 | 264.9339728 | 264.973048 | 264.939664 | 264.7167664 |
| 10/4/2013 7:00  | 2.6416 | 264.8541312 | 264.9249728 | 264.960048 | 264.905664 | 264.7187664 |
| 10/4/2013 7:10  | 2.667  | 264.8480352 | 264.9149728 | 264.952048 | 264.897664 | 264.7157664 |
| 10/4/2013 7:20  | 2.667  | 264.8428536 | 264.9029728 | 264.942048 | 264.890664 | 264.7117664 |
| 10/4/2013 7:30  | 2.667  | 264.8471208 | 264.9109728 | 264.932048 | 264.893664 | 264.7117664 |
| 10/4/2013 7:40  | 2.667  | 264.8739432 | 264.9489728 | 264.931048 | 264.928664 | 264.7307664 |
| 10/4/2013 7:50  | 2.7178 | 264.9035088 | 264.9899728 | 264.937048 | 264.971664 | 264.7467664 |
| 10/4/2013 8:00  | 2.9464 | 264.9281976 | 265.0249728 | 264.951048 | 265.003664 | 264.7647664 |
| 10/4/2013 8:10  | 3.0226 | 264.941304  | 265.0389728 | 264.972048 | 265.012664 | 264.7787664 |
| 10/4/2013 8:20  | 3.048  | 264.9425232 | 265.0379728 | 264.987048 | 265.015664 | 264.7817664 |
| 10/4/2013 8:30  | 3.0734 | 264.9467904 | 265.0399728 | 264.998048 | 265.018664 | 264.7857664 |
| 10/4/2013 8:40  | 3.0988 | 264.9544104 | 265.0489728 | 265.007048 | 265.023664 | 264.7927664 |
| 10/4/2013 8:50  | 3.1242 | 264.9730032 | 265.0759728 | 265.019048 | 265.043664 | 264.8077664 |
| 10/4/2013 9:00  | 3.175  | 264.9955584 | 265.1069728 | 265.035048 | 265.080664 | 264.8207664 |
| 10/4/2013 9:10  | 3.2258 | 265.014456  | 265.1309728 | 265.054048 | 265.102664 | 264.8337664 |
| 10/4/2013 9:20  | 3.2258 | 265.0284768 | 265.1439728 | 265.073048 | 265.115664 | 264.8457664 |
| 10/4/2013 9:30  | 3.2258 | 265.0351824 | 265.1519728 | 265.089048 | 265.124664 | 264.8527664 |
| 10/4/2013 9:40  | 3.2512 | 265.0424976 | 265.1569728 | 265.104048 | 265.128664 | 264.8597664 |
| 10/4/2013 9:50  | 3.2512 | 265.0485936 | 265.1619728 | 265.115048 | 265.135664 | 264.8667664 |
| 10/4/2013 10:00 | 3.2512 | 265.0565184 | 265.1729728 | 265.126048 | 265.144664 | 264.8727664 |
| 10/4/2013 10:10 | 3.2512 | 265.0613952 | 265.1749728 | 265.135048 | 265.150664 | 264.8797664 |
| 10/4/2013 10:20 | 3.2512 | 265.0617    | 265.1759728 | 265.142048 | 265.145664 | 264.8807664 |
| 10/4/2013 10:30 | 3.2512 | 265.0626144 | 265.1709728 | 265.148048 | 265.149664 | 264.8857664 |
| 10/4/2013 10:40 | 3.2512 | 265.0610904 | 265.1689728 | 265.152048 | 265.146664 | 264.8847664 |
| 10/4/2013 10:50 | 3.2512 | 265.0565184 | 265.1589728 | 265.150048 | 265.131664 | 264.8837664 |
| 10/4/2013 11:00 | 3.2512 | 265.0513368 | 265.1479728 | 265.150048 | 265.119664 | 264.8807664 |
| 10/4/2013 11:10 | 3.2512 | 265.0452408 | 265.1389728 | 265.146048 | 265.105664 | 264.8777664 |
| 10/4/2013 11:20 | 3.2512 | 265.0385352 | 265.1269728 | 265.141048 | 265.096664 | 264.8757664 |
| 10/4/2013 11:30 | 3.2512 | 265.0330488 | 265.1119728 | 265.133048 | 265.082664 | 264.8687664 |
| 10/4/2013 11:40 | 3.2512 | 265.0239048 | 265.1039728 | 265.127048 | 265.073664 | 264.8667664 |
| 10/4/2013 11:50 | 3.2512 | 265.0132368 | 265.0869728 | 265.118048 | 265.056664 | 264.8587664 |
| 10/4/2013 12:00 | 3.2512 | 265.0050072 | 265.0729728 | 265.108048 | 265.043664 | 264.8567664 |
| 10/4/2013 12:10 | 3.2512 | 264.9937296 | 265.0589728 | 265.100048 | 265.034664 | 264.8507664 |
| 10/4/2013 12:20 | 3.2512 | 264.9833664 | 265.0399728 | 265.084048 | 265.011664 | 264.8447664 |
| 10/4/2013 12:30 | 3.2512 | 264.9696504 | 265.0219728 | 265.071048 | 264.997664 | 264.8337664 |
| 10/4/2013 12:40 | 3.2512 | 264.958068  | 265.0049728 | 265.059048 | 264.973664 | 264.8287664 |
| 10/4/2013 12:50 | 3.2512 | 264.9464856 | 264.9909728 | 265.045048 | 264.965664 | 264.8227664 |
| 10/4/2013 13:00 | 3.2512 | 264.933684  | 264.9729728 | 265.027048 | 264.954664 | 264.8107664 |
| 10/4/2013 13:10 | 3.2512 | 264.9205776 | 264.9539728 | 265.013048 | 264.947664 | 264.8037664 |
| 10/4/2013 13:20 | 3.2766 | 264.9102144 | 264.9349728 | 264.995048 | 264.938664 | 264.7987664 |
| 10/4/2013 13:30 | 3.2766 | 264.8977176 | 264.9219728 | 264.981048 | 264.906664 | 264.7897664 |
| 10/4/2013 13:40 | 3.2766 | 264.8867448 | 264.9069728 | 264.966048 | 264.889664 | 264.7837664 |
| 10/4/2013 13:50 | 3.2766 | 264.8736384 | 264.8909728 | 264.950048 | 264.872664 | 264.7737664 |

|                 |        |             |             |            |            |             |
|-----------------|--------|-------------|-------------|------------|------------|-------------|
| 10/4/2013 14:00 | 3.2766 | 264.8629704 | 264.8779728 | 264.932048 | 264.862664 | 264.7657664 |
| 10/4/2013 14:10 | 3.2766 | 264.8516928 | 264.8629728 | 264.916048 | 264.846664 | 264.7577664 |
| 10/4/2013 14:20 | 3.2766 | 264.8419392 | 264.8479728 | 264.900048 | 264.842664 | 264.7517664 |
| 10/4/2013 14:30 | 3.2766 | 264.8321856 | 264.8369728 | 264.888048 | 264.844664 | 264.7447664 |
| 10/4/2013 14:40 | 3.2766 | 264.8215176 | 264.8229728 | 264.873048 | 264.846664 | 264.7377664 |
| 10/4/2013 14:50 | 3.2766 | 264.8114592 | 264.8099728 | 264.859048 | 264.845664 | 264.7327664 |
| 10/4/2013 15:00 | 3.2766 | 264.8023152 | 264.7969728 | 264.845048 | 264.843664 | 264.7237664 |
| 10/4/2013 15:10 | 3.2766 | 264.7931712 | 264.7889728 | 264.832048 | 264.843664 | 264.7187664 |
| 10/4/2013 15:20 | 3.2766 | 264.785856  | 264.7779728 | 264.820048 | 264.842664 | 264.7147664 |
| 10/4/2013 15:30 | 3.2766 | 264.7773216 | 264.7669728 | 264.807048 | 264.842664 | 264.7057664 |
| 10/4/2013 15:40 | 3.2766 | 264.7678728 | 264.7569728 | 264.798048 | 264.842664 | 264.6987664 |
| 10/4/2013 15:50 | 3.2766 | 264.7611672 | 264.7469728 | 264.783048 | 264.839664 | 264.6927664 |
| 10/4/2013 16:00 | 3.2766 | 264.7535472 | 264.7379728 | 264.775048 | 264.837664 | 264.6877664 |
| 10/4/2013 16:10 | 3.2766 | 264.7468416 | 264.7299728 | 264.764048 | 264.840664 | 264.6867664 |
| 10/4/2013 16:20 | 3.2766 | 264.7413552 | 264.7269728 | 264.756048 | 264.838664 | 264.6797664 |
| 10/4/2013 16:30 | 3.2766 | 264.735564  | 264.7189728 | 264.748048 | 264.836664 | 264.6747664 |
| 10/4/2013 16:40 | 3.2766 | 264.7303824 | 264.7139728 | 264.737048 | 264.836664 | 264.6707664 |
| 10/4/2013 16:50 | 3.2766 | 264.7252008 | 264.7069728 | 264.731048 | 264.837664 | 264.6687664 |
| 10/4/2013 17:00 | 3.2766 | 264.7215432 | 264.7049728 | 264.727048 | 264.832664 | 264.6667664 |
| 10/4/2013 17:10 | 3.2766 | 264.717276  | 264.6979728 | 264.719048 | 264.835664 | 264.6617664 |
| 10/4/2013 17:20 | 3.2766 | 264.7136184 | 264.6949728 | 264.712048 | 264.831664 | 264.6597664 |
| 10/4/2013 17:30 | 3.2766 | 264.7093512 | 264.6909728 | 264.708048 | 264.834664 | 264.6557664 |
| 10/4/2013 17:40 | 3.2766 | 264.7056936 | 264.6849728 | 264.701048 | 264.829664 | 264.6527664 |
| 10/4/2013 17:50 | 3.2766 | 264.7026456 | 264.6829728 | 264.697048 | 264.829664 | 264.6497664 |
| 10/4/2013 18:00 | 3.2766 | 264.6983784 | 264.6779728 | 264.691048 | 264.827664 | 264.6457664 |
| 10/4/2013 18:10 | 3.2766 | 264.6938064 | 264.6739728 | 264.686048 | 264.826664 | 264.6437664 |
| 10/4/2013 18:20 | 3.2766 | 264.6925872 | 264.6719728 | 264.684048 | 264.825664 | 264.6437664 |
| 10/4/2013 18:30 | 3.2766 | 264.6901488 | 264.6699728 | 264.681048 | 264.823664 | 264.6407664 |
| 10/4/2013 18:40 | 3.2766 | 264.6855768 | 264.6649728 | 264.676048 | 264.823664 | 264.6387664 |
| 10/4/2013 18:50 | 3.2766 | 264.6828336 | 264.6609728 | 264.670048 | 264.819664 | 264.6347664 |
| 10/4/2013 19:00 | 3.2766 | 264.6807    | 264.6579728 | 264.668048 | 264.819664 | 264.6317664 |
| 10/4/2013 19:10 | 3.2766 | 264.676128  | 264.6549728 | 264.666048 | 264.819664 | 264.6317664 |
| 10/4/2013 19:20 | 3.2766 | 264.67308   | 264.6469728 | 264.661048 | 264.818664 | 264.6287664 |
| 10/4/2013 19:30 | 3.2766 | 264.6712512 | 264.6479728 | 264.657048 | 264.816664 | 264.6247664 |
| 10/4/2013 19:40 | 3.2766 | 264.6694224 | 264.6469728 | 264.654048 | 264.812664 | 264.6217664 |
| 10/4/2013 19:50 | 3.2766 | 264.6651552 | 264.6399728 | 264.651048 | 264.814664 | 264.6187664 |
| 10/4/2013 20:00 | 3.2766 | 264.6645456 | 264.6419728 | 264.647048 | 264.809664 | 264.6197664 |
| 10/4/2013 20:10 | 3.2766 | 264.6621072 | 264.6419728 | 264.648048 | 264.813664 | 264.6197664 |
| 10/4/2013 20:20 | 3.2766 | 264.65784   | 264.6339728 | 264.643048 | 264.809664 | 264.6147664 |
| 10/4/2013 20:30 | 3.2766 | 264.6554016 | 264.6289728 | 264.642048 | 264.807664 | 264.6137664 |
| 10/4/2013 20:40 | 3.2766 | 264.6544872 | 264.6289728 | 264.638048 | 264.807664 | 264.6137664 |
| 10/4/2013 20:50 | 3.2766 | 264.6496104 | 264.6239728 | 264.635048 | 264.807664 | 264.6097664 |
| 10/4/2013 21:00 | 3.2766 | 264.6496104 | 264.6239728 | 264.633048 | 264.805664 | 264.6117664 |
| 10/4/2013 21:10 | 3.2766 | 264.6496104 | 264.6259728 | 264.629048 | 264.802664 | 264.6077664 |
| 10/4/2013 21:20 | 3.2766 | 264.6450384 | 264.6179728 | 264.626048 | 264.799664 | 264.6047664 |
| 10/4/2013 21:30 | 3.2766 | 264.6432096 | 264.6159728 | 264.626048 | 264.800664 | 264.6047664 |
| 10/4/2013 21:40 | 3.2766 | 264.6426    | 264.6169728 | 264.623048 | 264.798664 | 264.6017664 |

|                 |        |             |             |            |            |             |
|-----------------|--------|-------------|-------------|------------|------------|-------------|
| 10/4/2013 21:50 | 3.2766 | 264.6377232 | 264.6099728 | 264.620048 | 264.792664 | 264.5987664 |
| 10/4/2013 22:00 | 3.2766 | 264.638028  | 264.6109728 | 264.619048 | 264.797664 | 264.5997664 |
| 10/4/2013 22:10 | 3.2766 | 264.63498   | 264.6079728 | 264.616048 | 264.794664 | 264.5967664 |
| 10/4/2013 22:20 | 3.2766 | 264.6343704 | 264.6099728 | 264.615048 | 264.793664 | 264.5987664 |
| 10/4/2013 22:30 | 3.2766 | 264.6328464 | 264.6059728 | 264.613048 | 264.792664 | 264.5967664 |
| 10/4/2013 22:40 | 3.2766 | 264.630408  | 264.6049728 | 264.608048 | 264.789664 | 264.5937664 |
| 10/4/2013 22:50 | 3.2766 | 264.6297984 | 264.6039728 | 264.608048 | 264.787664 | 264.5927664 |
| 10/4/2013 23:00 | 3.2766 | 264.62736   | 264.5999728 | 264.604048 | 264.786664 | 264.5907664 |
| 10/4/2013 23:10 | 3.2766 | 264.625836  | 264.6009728 | 264.605048 | 264.787664 | 264.5917664 |
| 10/4/2013 23:20 | 3.2766 | 264.6240072 | 264.5989728 | 264.601048 | 264.781664 | 264.5857664 |
| 10/4/2013 23:30 | 3.2766 | 264.6200448 | 264.5939728 | 264.603048 | 264.782664 | 264.5867664 |
| 10/4/2013 23:40 | 3.2766 | 264.6203496 | 264.5959728 | 264.600048 | 264.782664 | 264.5867664 |
| 10/4/2013 23:50 | 3.2766 | 264.6179112 | 264.5919728 | 264.598048 | 264.781664 | 264.5837664 |
| 10/5/2013 0:00  | 3.2766 | 264.6160824 | 264.5889728 | 264.596048 | 264.780664 | 264.5807664 |
| 10/5/2013 0:10  | 0      | 264.615168  | 264.5879728 | 264.594048 | 264.777664 | 264.5817664 |
| 10/5/2013 0:20  | 0      | 264.6118152 | 264.5849728 | 264.592048 | 264.774664 | 264.5807664 |
| 10/5/2013 0:30  | 0      | 264.6109008 | 264.5829728 | 264.590048 | 264.772664 | 264.5797664 |
| 10/5/2013 0:40  | 0      | 264.609072  | 264.5819728 | 264.588048 | 264.772664 | 264.5787664 |
| 10/5/2013 0:50  | 0      | 264.6051096 | 264.5759728 | 264.585048 | 264.769664 | 264.5737664 |
| 10/5/2013 1:00  | 0      | 264.6017568 | 264.5719728 | 264.583048 | 264.769664 | 264.5727664 |
| 10/5/2013 1:10  | 0      | 264.6020616 | 264.5759728 | 264.581048 | 264.768664 | 264.5707664 |
| 10/5/2013 1:20  | 0      | 264.5980992 | 264.5699728 | 264.577048 | 264.765664 | 264.5677664 |
| 10/5/2013 1:30  | 0      | 264.5956608 | 264.5669728 | 264.575048 | 264.764664 | 264.5667664 |
| 10/5/2013 1:40  | 0      | 264.595356  | 264.5669728 | 264.572048 | 264.763664 | 264.5647664 |
| 10/5/2013 1:50  | 0      | 264.5926128 | 264.5639728 | 264.570048 | 264.761664 | 264.5627664 |
| 10/5/2013 2:00  | 0      | 264.5910888 | 264.5609728 | 264.568048 | 264.758664 | 264.5627664 |
| 10/5/2013 2:10  | 0      | 264.5874312 | 264.5549728 | 264.563048 | 264.755664 | 264.5597664 |
| 10/5/2013 2:20  | 0      | 264.5856024 | 264.5549728 | 264.564048 | 264.756664 | 264.5597664 |
| 10/5/2013 2:30  | 0      | 264.584688  | 264.5529728 | 264.562048 | 264.755664 | 264.5597664 |
| 10/5/2013 2:40  | 0      | 264.5849928 | 264.5559728 | 264.560048 | 264.752664 | 264.5597664 |
| 10/5/2013 2:50  | 0      | 264.5843832 | 264.5549728 | 264.559048 | 264.749664 | 264.5597664 |
| 10/5/2013 3:00  | 0      | 264.583164  | 264.5529728 | 264.556048 | 264.748664 | 264.5567664 |
| 10/5/2013 3:10  | 0      | 264.58164   | 264.5479728 | 264.555048 | 264.745664 | 264.5547664 |
| 10/5/2013 3:20  | 0      | 264.5813352 | 264.5489728 | 264.555048 | 264.747664 | 264.5567664 |
| 10/5/2013 3:30  | 0      | 264.5819448 | 264.5539728 | 264.555048 | 264.743664 | 264.5567664 |
| 10/5/2013 3:40  | 0      | 264.5834688 | 264.5569728 | 264.554048 | 264.742664 | 264.5587664 |
| 10/5/2013 3:50  | 0      | 264.5810304 | 264.5509728 | 264.551048 | 264.739664 | 264.5537664 |
| 10/5/2013 4:00  | 0      | 264.583164  | 264.5559728 | 264.551048 | 264.740664 | 264.5547664 |
| 10/5/2013 4:10  | 0      | 264.5807256 | 264.5549728 | 264.554048 | 264.739664 | 264.5547664 |
| 10/5/2013 4:20  | 0      | 264.5810304 | 264.5529728 | 264.553048 | 264.736664 | 264.5527664 |
| 10/5/2013 4:30  | 0      | 264.5804208 | 264.5519728 | 264.552048 | 264.735664 | 264.5517664 |
| 10/5/2013 4:40  | 0      | 264.58164   | 264.5579728 | 264.553048 | 264.732664 | 264.5547664 |
| 10/5/2013 4:50  | 0      | 264.5795064 | 264.5559728 | 264.555048 | 264.733664 | 264.5557664 |
| 10/5/2013 5:00  | 0      | 264.5804208 | 264.5569728 | 264.554048 | 264.730664 | 264.5547664 |
| 10/5/2013 5:10  | 0      | 264.5798112 | 264.5579728 | 264.556048 | 264.729664 | 264.5547664 |
| 10/5/2013 5:20  | 0      | 264.578592  | 264.5539728 | 264.553048 | 264.726664 | 264.5537664 |
| 10/5/2013 5:30  | 0      | 264.5776776 | 264.5549728 | 264.554048 | 264.727664 | 264.5547664 |

|                 |   |             |             |            |            |             |
|-----------------|---|-------------|-------------|------------|------------|-------------|
| 10/5/2013 5:40  | 0 | 264.5764584 | 264.5529728 | 264.551048 | 264.723664 | 264.5517664 |
| 10/5/2013 5:50  | 0 | 264.5752392 | 264.5519728 | 264.550048 | 264.723664 | 264.5507664 |
| 10/5/2013 6:00  | 0 | 264.5743248 | 264.5479728 | 264.550048 | 264.720664 | 264.5497664 |
| 10/5/2013 6:10  | 0 | 264.5731056 | 264.5469728 | 264.546048 | 264.718664 | 264.5467664 |
| 10/5/2013 6:20  | 0 | 264.5721912 | 264.5449728 | 264.548048 | 264.717664 | 264.5467664 |
| 10/5/2013 6:30  | 0 | 264.5718864 | 264.5479728 | 264.547048 | 264.716664 | 264.5477664 |
| 10/5/2013 6:40  | 0 | 264.5706672 | 264.5469728 | 264.547048 | 264.715664 | 264.5447664 |
| 10/5/2013 6:50  | 0 | 264.5697528 | 264.5459728 | 264.546048 | 264.713664 | 264.5437664 |
| 10/5/2013 7:00  | 0 | 264.5682288 | 264.5429728 | 264.546048 | 264.712664 | 264.5437664 |
| 10/5/2013 7:10  | 0 | 264.5682288 | 264.5429728 | 264.544048 | 264.711664 | 264.5417664 |
| 10/5/2013 7:20  | 0 | 264.567924  | 264.5409728 | 264.543048 | 264.708664 | 264.5427664 |
| 10/5/2013 7:30  | 0 | 264.5670096 | 264.5409728 | 264.542048 | 264.708664 | 264.5417664 |
| 10/5/2013 7:40  | 0 | 264.5664    | 264.5409728 | 264.542048 | 264.707664 | 264.5427664 |
| 10/5/2013 7:50  | 0 | 264.5660952 | 264.5409728 | 264.539048 | 264.704664 | 264.5397664 |
| 10/5/2013 8:00  | 0 | 264.5660952 | 264.5409728 | 264.538048 | 264.703664 | 264.5397664 |
| 10/5/2013 8:10  | 0 | 264.5651808 | 264.5419728 | 264.540048 | 264.703664 | 264.5397664 |
| 10/5/2013 8:20  | 0 | 264.5645712 | 264.5419728 | 264.540048 | 264.701664 | 264.5407664 |
| 10/5/2013 8:30  | 0 | 264.5654856 | 264.5419728 | 264.540048 | 264.699664 | 264.5407664 |
| 10/5/2013 8:40  | 0 | 264.564876  | 264.5419728 | 264.540048 | 264.700664 | 264.5397664 |
| 10/5/2013 8:50  | 0 | 264.564876  | 264.5409728 | 264.537048 | 264.694664 | 264.5377664 |
| 10/5/2013 9:00  | 0 | 264.5654856 | 264.5439728 | 264.538048 | 264.696664 | 264.5377664 |
| 10/5/2013 9:10  | 0 | 264.5654856 | 264.5439728 | 264.541048 | 264.694664 | 264.5397664 |
| 10/5/2013 9:20  | 0 | 264.564876  | 264.5469728 | 264.541048 | 264.694664 | 264.5407664 |
| 10/5/2013 9:30  | 0 | 264.5654856 | 264.5409728 | 264.538048 | 264.689664 | 264.5367664 |
| 10/5/2013 9:40  | 0 | 264.5651808 | 264.5439728 | 264.540048 | 264.690664 | 264.5397664 |
| 10/5/2013 9:50  | 0 | 264.5660952 | 264.5459728 | 264.541048 | 264.689664 | 264.5387664 |
| 10/5/2013 10:00 | 0 | 264.5676192 | 264.5459728 | 264.540048 | 264.688664 | 264.5387664 |
| 10/5/2013 10:10 | 0 | 264.5673144 | 264.5459728 | 264.539048 | 264.685664 | 264.5367664 |
| 10/5/2013 10:20 | 0 | 264.5673144 | 264.5489728 | 264.542048 | 264.686664 | 264.5397664 |
| 10/5/2013 10:30 | 0 | 264.5697528 | 264.5519728 | 264.544048 | 264.687664 | 264.5407664 |
| 10/5/2013 10:40 | 0 | 264.5700576 | 264.5549728 | 264.542048 | 264.684664 | 264.5427664 |
| 10/5/2013 10:50 | 0 | 264.5685336 | 264.5509728 | 264.546048 | 264.683664 | 264.5417664 |
| 10/5/2013 11:00 | 0 | 264.5703624 | 264.5519728 | 264.546048 | 264.682664 | 264.5407664 |
| 10/5/2013 11:10 | 0 | 264.5703624 | 264.5559728 | 264.547048 | 264.680664 | 264.5437664 |
| 10/5/2013 11:20 | 0 | 264.570972  | 264.5539728 | 264.545048 | 264.679664 | 264.5397664 |
| 10/5/2013 11:30 | 0 | 264.5712768 | 264.5539728 | 264.546048 | 264.676664 | 264.5427664 |
| 10/5/2013 11:40 | 0 | 264.5697528 | 264.5489728 | 264.546048 | 264.675664 | 264.5397664 |
| 10/5/2013 11:50 | 0 | 264.5688384 | 264.5469728 | 264.549048 | 264.678664 | 264.5407664 |
| 10/5/2013 12:00 | 0 | 264.570972  | 264.5539728 | 264.548048 | 264.674664 | 264.5427664 |
| 10/5/2013 12:10 | 0 | 264.5691432 | 264.5519728 | 264.548048 | 264.674664 | 264.5407664 |
| 10/5/2013 12:20 | 0 | 264.5667048 | 264.5499728 | 264.549048 | 264.673664 | 264.5417664 |
| 10/5/2013 12:30 | 0 | 264.5660952 | 264.5479728 | 264.548048 | 264.671664 | 264.5397664 |
| 10/5/2013 12:40 | 0 | 264.5664    | 264.5479728 | 264.545048 | 264.669664 | 264.5377664 |
| 10/5/2013 12:50 | 0 | 264.5639616 | 264.5429728 | 264.544048 | 264.671664 | 264.5367664 |
| 10/5/2013 13:00 | 0 | 264.5627424 | 264.5429728 | 264.544048 | 264.667664 | 264.5347664 |
| 10/5/2013 13:10 | 0 | 264.5621328 | 264.5419728 | 264.543048 | 264.667664 | 264.5337664 |
| 10/5/2013 13:20 | 0 | 264.561828  | 264.5419728 | 264.543048 | 264.667664 | 264.5357664 |

|                 |   |             |             |            |            |             |
|-----------------|---|-------------|-------------|------------|------------|-------------|
| 10/5/2013 13:30 | 0 | 264.5615232 | 264.5449728 | 264.545048 | 264.670664 | 264.5367664 |
| 10/5/2013 13:40 | 0 | 264.5606088 | 264.5389728 | 264.540048 | 264.661664 | 264.5337664 |
| 10/5/2013 13:50 | 0 | 264.55878   | 264.5399728 | 264.540048 | 264.664664 | 264.5327664 |
| 10/5/2013 14:00 | 0 | 264.5581704 | 264.5389728 | 264.539048 | 264.662664 | 264.5317664 |
| 10/5/2013 14:10 | 0 | 264.557256  | 264.5349728 | 264.539048 | 264.660664 | 264.5297664 |
| 10/5/2013 14:20 | 0 | 264.5554272 | 264.5329728 | 264.537048 | 264.658664 | 264.5277664 |
| 10/5/2013 14:30 | 0 | 264.5545128 | 264.5329728 | 264.534048 | 264.654664 | 264.5267664 |
| 10/5/2013 14:40 | 0 | 264.5539032 | 264.5309728 | 264.534048 | 264.656664 | 264.5257664 |
| 10/5/2013 14:50 | 0 | 264.5523792 | 264.5309728 | 264.533048 | 264.655664 | 264.5247664 |
| 10/5/2013 15:00 | 0 | 264.549636  | 264.5259728 | 264.531048 | 264.655664 | 264.5267664 |
| 10/5/2013 15:10 | 0 | 264.5490264 | 264.5259728 | 264.529048 | 264.653664 | 264.5217664 |
| 10/5/2013 15:20 | 0 | 264.5478072 | 264.5269728 | 264.529048 | 264.654664 | 264.5247664 |
| 10/5/2013 15:30 | 0 | 264.5471976 | 264.5249728 | 264.529048 | 264.652664 | 264.5237664 |
| 10/5/2013 15:40 | 0 | 264.5453688 | 264.5239728 | 264.526048 | 264.652664 | 264.5207664 |
| 10/5/2013 15:50 | 0 | 264.5438448 | 264.5239728 | 264.525048 | 264.651664 | 264.5227664 |
| 10/5/2013 16:00 | 0 | 264.5438448 | 264.5229728 | 264.523048 | 264.650664 | 264.5217664 |
| 10/5/2013 16:10 | 0 | 264.5426256 | 264.5229728 | 264.524048 | 264.650664 | 264.5197664 |
| 10/5/2013 16:20 | 0 | 264.5414064 | 264.5219728 | 264.523048 | 264.648664 | 264.5187664 |
| 10/5/2013 16:30 | 0 | 264.5411016 | 264.5229728 | 264.522048 | 264.648664 | 264.5197664 |
| 10/5/2013 16:40 | 0 | 264.5395776 | 264.5199728 | 264.520048 | 264.646664 | 264.5177664 |
| 10/5/2013 16:50 | 0 | 264.5380536 | 264.5149728 | 264.518048 | 264.644664 | 264.5167664 |
| 10/5/2013 17:00 | 0 | 264.5377488 | 264.5169728 | 264.515048 | 264.642664 | 264.5137664 |
| 10/5/2013 17:10 | 0 | 264.5368344 | 264.5149728 | 264.515048 | 264.642664 | 264.5157664 |
| 10/5/2013 17:20 | 0 | 264.5356152 | 264.5139728 | 264.514048 | 264.642664 | 264.5117664 |
| 10/5/2013 17:30 | 0 | 264.534396  | 264.5139728 | 264.514048 | 264.640664 | 264.5117664 |
| 10/5/2013 17:40 | 0 | 264.5325672 | 264.5089728 | 264.513048 | 264.638664 | 264.5107664 |
| 10/5/2013 17:50 | 0 | 264.5337864 | 264.5139728 | 264.511048 | 264.640664 | 264.5137664 |
| 10/5/2013 18:00 | 0 | 264.531348  | 264.5059728 | 264.509048 | 264.635664 | 264.5087664 |
| 10/5/2013 18:10 | 0 | 264.5319576 | 264.5109728 | 264.510048 | 264.635664 | 264.5087664 |
| 10/5/2013 18:20 | 0 | 264.5301288 | 264.5069728 | 264.506048 | 264.635664 | 264.5067664 |
| 10/5/2013 18:30 | 0 | 264.5301288 | 264.5089728 | 264.507048 | 264.634664 | 264.5087664 |
| 10/5/2013 18:40 | 0 | 264.5295192 | 264.5099728 | 264.508048 | 264.634664 | 264.5097664 |
| 10/5/2013 18:50 | 0 | 264.5276904 | 264.5049728 | 264.507048 | 264.633664 | 264.5067664 |
| 10/5/2013 19:00 | 0 | 264.5270808 | 264.5029728 | 264.503048 | 264.628664 | 264.5057664 |
| 10/5/2013 19:10 | 0 | 264.5264712 | 264.5049728 | 264.500048 | 264.629664 | 264.5047664 |
| 10/5/2013 19:20 | 0 | 264.5243376 | 264.5029728 | 264.503048 | 264.628664 | 264.5057664 |
| 10/5/2013 19:30 | 0 | 264.5243376 | 264.4999728 | 264.502048 | 264.627664 | 264.5047664 |
| 10/5/2013 19:40 | 0 | 264.525252  | 264.5029728 | 264.500048 | 264.625664 | 264.5047664 |
| 10/5/2013 19:50 | 0 | 264.5228136 | 264.5009728 | 264.502048 | 264.625664 | 264.5037664 |
| 10/5/2013 20:00 | 0 | 264.5240328 | 264.5019728 | 264.499048 | 264.622664 | 264.5027664 |
| 10/5/2013 20:10 | 0 | 264.5231184 | 264.4999728 | 264.498048 | 264.622664 | 264.5027664 |
| 10/5/2013 20:20 | 0 | 264.52068   | 264.4959728 | 264.499048 | 264.623664 | 264.5027664 |
| 10/5/2013 20:30 | 0 | 264.5218992 | 264.4989728 | 264.499048 | 264.621664 | 264.5027664 |
| 10/5/2013 20:40 | 0 | 264.5209848 | 264.4989728 | 264.499048 | 264.619664 | 264.5017664 |
| 10/5/2013 20:50 | 0 | 264.519156  | 264.4939728 | 264.496048 | 264.619664 | 264.4987664 |
| 10/5/2013 21:00 | 0 | 264.5203752 | 264.4999728 | 264.498048 | 264.620664 | 264.5017664 |
| 10/5/2013 21:10 | 0 | 264.5200704 | 264.4999728 | 264.496048 | 264.619664 | 264.5017664 |

|                 |   |             |             |            |            |             |
|-----------------|---|-------------|-------------|------------|------------|-------------|
| 10/5/2013 21:20 | 0 | 264.5182416 | 264.4929728 | 264.494048 | 264.614664 | 264.4957664 |
| 10/5/2013 21:30 | 0 | 264.5194608 | 264.4969728 | 264.495048 | 264.616664 | 264.4987664 |
| 10/5/2013 21:40 | 0 | 264.5185464 | 264.4989728 | 264.496048 | 264.614664 | 264.5007664 |
| 10/5/2013 21:50 | 0 | 264.5170224 | 264.4929728 | 264.495048 | 264.612664 | 264.4957664 |
| 10/5/2013 22:00 | 0 | 264.5173272 | 264.4969728 | 264.494048 | 264.612664 | 264.4987664 |
| 10/5/2013 22:10 | 0 | 264.5148888 | 264.4899728 | 264.496048 | 264.613664 | 264.4967664 |
| 10/5/2013 22:20 | 0 | 264.514584  | 264.4919728 | 264.492048 | 264.612664 | 264.4967664 |
| 10/5/2013 22:30 | 0 | 264.514584  | 264.4899728 | 264.492048 | 264.610664 | 264.4947664 |
| 10/5/2013 22:40 | 0 | 264.5121456 | 264.4859728 | 264.488048 | 264.605664 | 264.4917664 |
| 10/5/2013 22:50 | 0 | 264.5127552 | 264.4899728 | 264.487048 | 264.608664 | 264.4927664 |
| 10/5/2013 23:00 | 0 | 264.5124504 | 264.4899728 | 264.487048 | 264.607664 | 264.4937664 |
| 10/5/2013 23:10 | 0 | 264.5109264 | 264.4859728 | 264.487048 | 264.607664 | 264.4917664 |
| 10/5/2013 23:20 | 0 | 264.511536  | 264.4879728 | 264.486048 | 264.605664 | 264.4917664 |
| 10/5/2013 23:30 | 0 | 264.5103168 | 264.4879728 | 264.484048 | 264.606664 | 264.4917664 |
| 10/5/2013 23:40 | 0 | 264.5078784 | 264.4809728 | 264.486048 | 264.604664 | 264.4897664 |
| 10/5/2013 23:50 | 0 | 264.5081832 | 264.4819728 | 264.482048 | 264.604664 | 264.4897664 |
| 10/6/2013 0:00  | 0 | 264.5072688 | 264.4849728 | 264.483048 | 264.601664 | 264.4887664 |
| 10/6/2013 0:10  | 0 | 264.5048304 | 264.4799728 | 264.481048 | 264.603664 | 264.4887664 |
| 10/6/2013 0:20  | 0 | 264.5033064 | 264.4749728 | 264.480048 | 264.602664 | 264.4867664 |
| 10/6/2013 0:30  | 0 | 264.5036112 | 264.4789728 | 264.479048 | 264.598664 | 264.4877664 |
| 10/6/2013 0:40  | 0 | 264.5030016 | 264.4819728 | 264.479048 | 264.600664 | 264.4857664 |
| 10/6/2013 0:50  | 0 | 264.500868  | 264.4729728 | 264.478048 | 264.601664 | 264.4867664 |
| 10/6/2013 1:00  | 0 | 264.4990392 | 264.4729728 | 264.477048 | 264.598664 | 264.4837664 |
| 10/6/2013 1:10  | 0 | 264.4987344 | 264.4699728 | 264.472048 | 264.595664 | 264.4827664 |
| 10/6/2013 1:20  | 0 | 264.4987344 | 264.4729728 | 264.474048 | 264.597664 | 264.4847664 |
| 10/6/2013 1:30  | 0 | 264.496296  | 264.4679728 | 264.471048 | 264.596664 | 264.4817664 |
| 10/6/2013 1:40  | 0 | 264.4944672 | 264.4629728 | 264.472048 | 264.594664 | 264.4817664 |
| 10/6/2013 1:50  | 0 | 264.4956864 | 264.4709728 | 264.470048 | 264.594664 | 264.4807664 |
| 10/6/2013 2:00  | 0 | 264.4941624 | 264.4669728 | 264.467048 | 264.590664 | 264.4797664 |
| 10/6/2013 2:10  | 0 | 264.4911144 | 264.4609728 | 264.466048 | 264.590664 | 264.4777664 |
| 10/6/2013 2:20  | 0 | 264.4908096 | 264.4589728 | 264.466048 | 264.590664 | 264.4777664 |
| 10/6/2013 2:30  | 0 | 264.491724  | 264.4629728 | 264.464048 | 264.590664 | 264.4777664 |
| 10/6/2013 2:40  | 0 | 264.4908096 | 264.4649728 | 264.464048 | 264.589664 | 264.4787664 |
| 10/6/2013 2:50  | 0 | 264.4877616 | 264.4579728 | 264.462048 | 264.586664 | 264.4737664 |
| 10/6/2013 3:00  | 0 | 264.4865424 | 264.4559728 | 264.460048 | 264.588664 | 264.4737664 |
| 10/6/2013 3:10  | 0 | 264.4892856 | 264.4619728 | 264.460048 | 264.586664 | 264.4757664 |
| 10/6/2013 3:20  | 0 | 264.4862376 | 264.4579728 | 264.457048 | 264.584664 | 264.4717664 |
| 10/6/2013 3:30  | 0 | 264.4844088 | 264.4489728 | 264.456048 | 264.584664 | 264.4707664 |
| 10/6/2013 3:40  | 0 | 264.4850184 | 264.4529728 | 264.455048 | 264.579664 | 264.4707664 |
| 10/6/2013 3:50  | 0 | 264.4850184 | 264.4579728 | 264.458048 | 264.583664 | 264.4727664 |
| 10/6/2013 4:00  | 0 | 264.4837992 | 264.4569728 | 264.455048 | 264.579664 | 264.4717664 |
| 10/6/2013 4:10  | 0 | 264.4807512 | 264.4489728 | 264.454048 | 264.577664 | 264.4667664 |
| 10/6/2013 4:20  | 0 | 264.4804464 | 264.4499728 | 264.452048 | 264.578664 | 264.4677664 |
| 10/6/2013 4:30  | 0 | 264.4801416 | 264.4489728 | 264.452048 | 264.578664 | 264.4677664 |
| 10/6/2013 4:40  | 0 | 264.4798368 | 264.4519728 | 264.453048 | 264.576664 | 264.4687664 |
| 10/6/2013 4:50  | 0 | 264.4792272 | 264.4489728 | 264.451048 | 264.576664 | 264.4657664 |
| 10/6/2013 5:00  | 0 | 264.4792272 | 264.4499728 | 264.452048 | 264.575664 | 264.4667664 |



|                 |   |             |             |            |            |             |
|-----------------|---|-------------|-------------|------------|------------|-------------|
| 10/6/2013 5:10  | 0 | 264.4783128 | 264.4499728 | 264.451048 | 264.575664 | 264.4657664 |
| 10/6/2013 5:20  | 0 | 264.4777032 | 264.4459728 | 264.448048 | 264.572664 | 264.4637664 |
| 10/6/2013 5:30  | 0 | 264.4777032 | 264.4499728 | 264.450048 | 264.574664 | 264.4687664 |
| 10/6/2013 5:40  | 0 | 264.4770936 | 264.4479728 | 264.451048 | 264.574664 | 264.4667664 |
| 10/6/2013 5:50  | 0 | 264.4761792 | 264.4479728 | 264.448048 | 264.572664 | 264.4637664 |
| 10/6/2013 6:00  | 0 | 264.4755696 | 264.4469728 | 264.448048 | 264.573664 | 264.4657664 |
| 10/6/2013 6:10  | 0 | 264.47496   | 264.4449728 | 264.447048 | 264.570664 | 264.4627664 |
| 10/6/2013 6:20  | 0 | 264.4746552 | 264.4469728 | 264.449048 | 264.570664 | 264.4627664 |
| 10/6/2013 6:30  | 0 | 264.4746552 | 264.4469728 | 264.446048 | 264.570664 | 264.4617664 |
| 10/6/2013 6:40  | 0 | 264.4737408 | 264.4469728 | 264.446048 | 264.572664 | 264.4617664 |
| 10/6/2013 6:50  | 0 | 264.473436  | 264.4479728 | 264.446048 | 264.569664 | 264.4637664 |
| 10/6/2013 7:00  | 0 | 264.4728264 | 264.4459728 | 264.445048 | 264.567664 | 264.4617664 |
| 10/6/2013 7:10  | 0 | 264.4725216 | 264.4449728 | 264.444048 | 264.566664 | 264.4587664 |
| 10/6/2013 7:20  | 0 | 264.4728264 | 264.4499728 | 264.444048 | 264.566664 | 264.4627664 |
| 10/6/2013 7:30  | 0 | 264.4725216 | 264.4469728 | 264.444048 | 264.565664 | 264.4627664 |
| 10/6/2013 7:40  | 0 | 264.4728264 | 264.4449728 | 264.441048 | 264.560664 | 264.4597664 |
| 10/6/2013 7:50  | 0 | 264.4728264 | 264.4489728 | 264.442048 | 264.564664 | 264.4597664 |
| 10/6/2013 8:00  | 0 | 264.4728264 | 264.4499728 | 264.444048 | 264.562664 | 264.4607664 |
| 10/6/2013 8:10  | 0 | 264.4728264 | 264.4479728 | 264.442048 | 264.562664 | 264.4607664 |
| 10/6/2013 8:20  | 0 | 264.4728264 | 264.4459728 | 264.442048 | 264.559664 | 264.4587664 |
| 10/6/2013 8:30  | 0 | 264.4740456 | 264.4509728 | 264.444048 | 264.559664 | 264.4617664 |
| 10/6/2013 8:40  | 0 | 264.4746552 | 264.4519728 | 264.445048 | 264.559664 | 264.4637664 |
| 10/6/2013 8:50  | 0 | 264.47496   | 264.4539728 | 264.446048 | 264.558664 | 264.4647664 |
| 10/6/2013 9:00  | 0 | 264.4743504 | 264.4519728 | 264.448048 | 264.558664 | 264.4637664 |
| 10/6/2013 9:10  | 0 | 264.4758744 | 264.4549728 | 264.448048 | 264.556664 | 264.4627664 |
| 10/6/2013 9:20  | 0 | 264.4767888 | 264.4559728 | 264.445048 | 264.553664 | 264.4617664 |
| 10/6/2013 9:30  | 0 | 264.478008  | 264.4589728 | 264.448048 | 264.557664 | 264.4637664 |
| 10/6/2013 9:40  | 0 | 264.4792272 | 264.4639728 | 264.452048 | 264.555664 | 264.4657664 |
| 10/6/2013 9:50  | 0 | 264.4798368 | 264.4629728 | 264.452048 | 264.554664 | 264.4637664 |
| 10/6/2013 10:00 | 0 | 264.4813608 | 264.4639728 | 264.452048 | 264.552664 | 264.4657664 |
| 10/6/2013 10:10 | 0 | 264.4828848 | 264.4679728 | 264.454048 | 264.554664 | 264.4657664 |
| 10/6/2013 10:20 | 0 | 264.484104  | 264.4659728 | 264.457048 | 264.552664 | 264.4697664 |
| 10/6/2013 10:30 | 0 | 264.4862376 | 264.4709728 | 264.459048 | 264.550664 | 264.4697664 |
| 10/6/2013 10:40 | 0 | 264.4865424 | 264.4699728 | 264.457048 | 264.550664 | 264.4667664 |
| 10/6/2013 10:50 | 0 | 264.4883712 | 264.4749728 | 264.460048 | 264.550664 | 264.4697664 |
| 10/6/2013 11:00 | 0 | 264.4898952 | 264.4769728 | 264.464048 | 264.550664 | 264.4687664 |
| 10/6/2013 11:10 | 0 | 264.491724  | 264.4819728 | 264.466048 | 264.550664 | 264.4717664 |
| 10/6/2013 11:20 | 0 | 264.4926384 | 264.4769728 | 264.465048 | 264.549664 | 264.4697664 |
| 10/6/2013 11:30 | 0 | 264.4953816 | 264.4849728 | 264.469048 | 264.553664 | 264.4757664 |
| 10/6/2013 11:40 | 0 | 264.4959912 | 264.4849728 | 264.472048 | 264.550664 | 264.4757664 |
| 10/6/2013 11:50 | 0 | 264.4941624 | 264.4769728 | 264.472048 | 264.548664 | 264.4737664 |
| 10/6/2013 12:00 | 0 | 264.4953816 | 264.4829728 | 264.477048 | 264.550664 | 264.4737664 |
| 10/6/2013 12:10 | 0 | 264.4950768 | 264.4829728 | 264.473048 | 264.546664 | 264.4737664 |
| 10/6/2013 12:20 | 0 | 264.493248  | 264.4749728 | 264.473048 | 264.545664 | 264.4707664 |
| 10/6/2013 12:30 | 0 | 264.4956864 | 264.4849728 | 264.475048 | 264.546664 | 264.4747664 |
| 10/6/2013 12:40 | 0 | 264.4999536 | 264.4909728 | 264.477048 | 264.547664 | 264.4787664 |
| 10/6/2013 12:50 | 0 | 264.4990392 | 264.4879728 | 264.479048 | 264.545664 | 264.4767664 |

|                 |        |             |             |            |            |             |
|-----------------|--------|-------------|-------------|------------|------------|-------------|
| 10/6/2013 13:00 | 0      | 264.4987344 | 264.4849728 | 264.480048 | 264.543664 | 264.4747664 |
| 10/6/2013 13:10 | 0      | 264.499344  | 264.4879728 | 264.480048 | 264.545664 | 264.4767664 |
| 10/6/2013 13:20 | 0      | 264.499344  | 264.4869728 | 264.482048 | 264.545664 | 264.4757664 |
| 10/6/2013 13:30 | 0      | 264.4996488 | 264.4859728 | 264.482048 | 264.543664 | 264.4757664 |
| 10/6/2013 13:40 | 0      | 264.4981248 | 264.4839728 | 264.483048 | 264.543664 | 264.4737664 |
| 10/6/2013 13:50 | 0      | 264.4950768 | 264.4769728 | 264.480048 | 264.544664 | 264.4737664 |
| 10/6/2013 14:00 | 0      | 264.4950768 | 264.4809728 | 264.478048 | 264.542664 | 264.4717664 |
| 10/6/2013 14:10 | 0      | 264.4956864 | 264.4849728 | 264.479048 | 264.542664 | 264.4767664 |
| 10/6/2013 14:20 | 0.0254 | 264.4950768 | 264.4829728 | 264.481048 | 264.543664 | 264.4747664 |
| 10/6/2013 14:30 | 0.0254 | 264.4950768 | 264.4799728 | 264.478048 | 264.542664 | 264.4747664 |
| 10/6/2013 14:40 | 0.0254 | 264.494772  | 264.4819728 | 264.478048 | 264.540664 | 264.4737664 |
| 10/6/2013 14:50 | 0.0508 | 264.493248  | 264.4779728 | 264.479048 | 264.543664 | 264.4747664 |
| 10/6/2013 15:00 | 0.0508 | 264.493248  | 264.4769728 | 264.476048 | 264.540664 | 264.4717664 |
| 10/6/2013 15:10 | 0.0762 | 264.4923336 | 264.4779728 | 264.477048 | 264.541664 | 264.4727664 |
| 10/6/2013 15:20 | 0.0762 | 264.491724  | 264.4779728 | 264.477048 | 264.541664 | 264.4727664 |
| 10/6/2013 15:30 | 0.1016 | 264.4911144 | 264.4769728 | 264.475048 | 264.540664 | 264.4717664 |
| 10/6/2013 15:40 | 0.127  | 264.4902    | 264.4719728 | 264.471048 | 264.537664 | 264.4687664 |
| 10/6/2013 15:50 | 0.1524 | 264.4902    | 264.4749728 | 264.474048 | 264.538664 | 264.4717664 |
| 10/6/2013 16:00 | 0.1524 | 264.4902    | 264.4719728 | 264.472048 | 264.538664 | 264.4717664 |
| 10/6/2013 16:10 | 0.1778 | 264.4895904 | 264.4719728 | 264.472048 | 264.537664 | 264.4697664 |
| 10/6/2013 16:20 | 0.2032 | 264.4889808 | 264.4699728 | 264.471048 | 264.538664 | 264.4697664 |
| 10/6/2013 16:30 | 0.2032 | 264.4883712 | 264.4739728 | 264.471048 | 264.540664 | 264.4697664 |
| 10/6/2013 16:40 | 0.2286 | 264.4877616 | 264.4689728 | 264.470048 | 264.535664 | 264.4687664 |
| 10/6/2013 16:50 | 0.2286 | 264.4874568 | 264.4719728 | 264.471048 | 264.535664 | 264.4687664 |
| 10/6/2013 17:00 | 0.2286 | 264.4868472 | 264.4699728 | 264.471048 | 264.534664 | 264.4677664 |
| 10/6/2013 17:10 | 0.254  | 264.4865424 | 264.4719728 | 264.469048 | 264.537664 | 264.4697664 |
| 10/6/2013 17:20 | 0.254  | 264.4865424 | 264.4689728 | 264.468048 | 264.534664 | 264.4667664 |
| 10/6/2013 17:30 | 0.254  | 264.487152  | 264.4719728 | 264.469048 | 264.536664 | 264.4687664 |
| 10/6/2013 17:40 | 0.2794 | 264.4874568 | 264.4719728 | 264.469048 | 264.534664 | 264.4677664 |
| 10/6/2013 17:50 | 0.2794 | 264.4877616 | 264.4739728 | 264.469048 | 264.535664 | 264.4677664 |
| 10/6/2013 18:00 | 0.3048 | 264.4883712 | 264.4749728 | 264.468048 | 264.535664 | 264.4697664 |
| 10/6/2013 18:10 | 0.3048 | 264.4895904 | 264.4779728 | 264.472048 | 264.533664 | 264.4697664 |
| 10/6/2013 18:20 | 0.3302 | 264.4911144 | 264.4799728 | 264.470048 | 264.534664 | 264.4697664 |
| 10/6/2013 18:30 | 0.3302 | 264.493248  | 264.4819728 | 264.472048 | 264.534664 | 264.4727664 |
| 10/6/2013 18:40 | 0.3556 | 264.4953816 | 264.4849728 | 264.472048 | 264.533664 | 264.4727664 |
| 10/6/2013 18:50 | 0.3556 | 264.496296  | 264.4839728 | 264.474048 | 264.532664 | 264.4727664 |
| 10/6/2013 19:00 | 0.3556 | 264.4975152 | 264.4889728 | 264.477048 | 264.533664 | 264.4757664 |
| 10/6/2013 19:10 | 0.3556 | 264.499344  | 264.4889728 | 264.475048 | 264.529664 | 264.4757664 |
| 10/6/2013 19:20 | 0.381  | 264.4999536 | 264.4909728 | 264.478048 | 264.531664 | 264.4757664 |
| 10/6/2013 19:30 | 0.381  | 264.5020872 | 264.4959728 | 264.482048 | 264.536664 | 264.4797664 |
| 10/6/2013 19:40 | 0.381  | 264.503916  | 264.4959728 | 264.481048 | 264.531664 | 264.4787664 |
| 10/6/2013 19:50 | 0.381  | 264.5048304 | 264.4949728 | 264.483048 | 264.532664 | 264.4797664 |
| 10/6/2013 20:00 | 0.381  | 264.506964  | 264.4979728 | 264.486048 | 264.530664 | 264.4807664 |
| 10/6/2013 20:10 | 0.381  | 264.5078784 | 264.4999728 | 264.487048 | 264.530664 | 264.4847664 |
| 10/6/2013 20:20 | 0.381  | 264.5075736 | 264.4969728 | 264.487048 | 264.531664 | 264.4807664 |
| 10/6/2013 20:30 | 0.381  | 264.506964  | 264.4969728 | 264.488048 | 264.530664 | 264.4827664 |
| 10/6/2013 20:40 | 0.381  | 264.506964  | 264.4989728 | 264.488048 | 264.530664 | 264.4837664 |

|                 |       |             |             |            |            |             |
|-----------------|-------|-------------|-------------|------------|------------|-------------|
| 10/6/2013 20:50 | 0.381 | 264.506964  | 264.4959728 | 264.490048 | 264.528664 | 264.4807664 |
| 10/6/2013 21:00 | 0.381 | 264.5072688 | 264.4989728 | 264.491048 | 264.530664 | 264.4827664 |
| 10/6/2013 21:10 | 0.381 | 264.5072688 | 264.4979728 | 264.490048 | 264.529664 | 264.4817664 |
| 10/6/2013 21:20 | 0.381 | 264.506964  | 264.4949728 | 264.491048 | 264.529664 | 264.4817664 |
| 10/6/2013 21:30 | 0.381 | 264.5057448 | 264.4919728 | 264.491048 | 264.528664 | 264.4807664 |
| 10/6/2013 21:40 | 0.381 | 264.5057448 | 264.4979728 | 264.492048 | 264.529664 | 264.4827664 |
| 10/6/2013 21:50 | 0.381 | 264.5048304 | 264.4949728 | 264.491048 | 264.526664 | 264.4807664 |
| 10/6/2013 22:00 | 0.381 | 264.5075736 | 264.4989728 | 264.491048 | 264.527664 | 264.4827664 |
| 10/6/2013 22:10 | 0.381 | 264.5078784 | 264.4989728 | 264.491048 | 264.527664 | 264.4827664 |
| 10/6/2013 22:20 | 0.381 | 264.5078784 | 264.4959728 | 264.491048 | 264.527664 | 264.4817664 |
| 10/6/2013 22:30 | 0.381 | 264.5066592 | 264.4929728 | 264.491048 | 264.527664 | 264.4817664 |
| 10/6/2013 22:40 | 0.381 | 264.506964  | 264.4979728 | 264.492048 | 264.529664 | 264.4837664 |
| 10/6/2013 22:50 | 0.381 | 264.5081832 | 264.4969728 | 264.491048 | 264.526664 | 264.4817664 |
| 10/6/2013 23:00 | 0.381 | 264.5060496 | 264.4929728 | 264.491048 | 264.528664 | 264.4807664 |
| 10/6/2013 23:10 | 0.381 | 264.50544   | 264.4919728 | 264.491048 | 264.523664 | 264.4807664 |
| 10/6/2013 23:20 | 0.381 | 264.5048304 | 264.4919728 | 264.491048 | 264.525664 | 264.4807664 |
| 10/6/2013 23:30 | 0.381 | 264.5048304 | 264.4909728 | 264.489048 | 264.522664 | 264.4797664 |
| 10/6/2013 23:40 | 0.381 | 264.5042208 | 264.4899728 | 264.488048 | 264.524664 | 264.4797664 |
| 10/6/2013 23:50 | 0.381 | 264.5036112 | 264.4919728 | 264.488048 | 264.525664 | 264.4807664 |
| 10/7/2013 0:00  | 0.381 | 264.5030016 | 264.4869728 | 264.489048 | 264.524664 | 264.4797664 |
| 10/7/2013 0:10  | 0     | 264.5014776 | 264.4849728 | 264.488048 | 264.525664 | 264.4797664 |
| 10/7/2013 0:20  | 0     | 264.4999536 | 264.4869728 | 264.486048 | 264.524664 | 264.4777664 |
| 10/7/2013 0:30  | 0     | 264.4981248 | 264.4809728 | 264.485048 | 264.524664 | 264.4767664 |
| 10/7/2013 0:40  | 0     | 264.4975152 | 264.4829728 | 264.485048 | 264.526664 | 264.4767664 |
| 10/7/2013 0:50  | 0     | 264.4944672 | 264.4739728 | 264.481048 | 264.524664 | 264.4727664 |
| 10/7/2013 1:00  | 0     | 264.4935528 | 264.4719728 | 264.479048 | 264.522664 | 264.4707664 |
| 10/7/2013 1:10  | 0     | 264.4926384 | 264.4759728 | 264.478048 | 264.525664 | 264.4717664 |
| 10/7/2013 1:20  | 0     | 264.4889808 | 264.4679728 | 264.477048 | 264.522664 | 264.4707664 |
| 10/7/2013 1:30  | 0     | 264.4868472 | 264.4619728 | 264.474048 | 264.522664 | 264.4657664 |
| 10/7/2013 1:40  | 0     | 264.4874568 | 264.4679728 | 264.473048 | 264.522664 | 264.4667664 |
| 10/7/2013 1:50  | 0     | 264.4850184 | 264.4679728 | 264.473048 | 264.524664 | 264.4687664 |
| 10/7/2013 2:00  | 0     | 264.4816656 | 264.4569728 | 264.468048 | 264.521664 | 264.4637664 |
| 10/7/2013 2:10  | 0     | 264.4798368 | 264.4539728 | 264.467048 | 264.521664 | 264.4647664 |
| 10/7/2013 2:20  | 0     | 264.4798368 | 264.4579728 | 264.466048 | 264.521664 | 264.4647664 |
| 10/7/2013 2:30  | 0     | 264.4789224 | 264.4579728 | 264.463048 | 264.521664 | 264.4647664 |
| 10/7/2013 2:40  | 0     | 264.4758744 | 264.4539728 | 264.460048 | 264.519664 | 264.4627664 |
| 10/7/2013 2:50  | 0     | 264.4731312 | 264.4479728 | 264.459048 | 264.519664 | 264.4587664 |
| 10/7/2013 3:00  | 0     | 264.473436  | 264.4479728 | 264.458048 | 264.521664 | 264.4607664 |
| 10/7/2013 3:10  | 0     | 264.4743504 | 264.4549728 | 264.456048 | 264.520664 | 264.4597664 |
| 10/7/2013 3:20  | 0     | 264.4722168 | 264.4509728 | 264.453048 | 264.518664 | 264.4597664 |
| 10/7/2013 3:30  | 0     | 264.4691688 | 264.4439728 | 264.455048 | 264.521664 | 264.4567664 |
| 10/7/2013 3:40  | 0     | 264.4691688 | 264.4439728 | 264.453048 | 264.519664 | 264.4577664 |
| 10/7/2013 3:50  | 0     | 264.4700832 | 264.4499728 | 264.449048 | 264.518664 | 264.4577664 |
| 10/7/2013 4:00  | 0     | 264.46734   | 264.4399728 | 264.448048 | 264.515664 | 264.4527664 |
| 10/7/2013 4:10  | 0     | 264.4652064 | 264.4339728 | 264.445048 | 264.517664 | 264.4547664 |
| 10/7/2013 4:20  | 0     | 264.4652064 | 264.4379728 | 264.444048 | 264.517664 | 264.4547664 |
| 10/7/2013 4:30  | 0     | 264.4649016 | 264.4419728 | 264.444048 | 264.516664 | 264.4557664 |

|                 |   |             |             |            |            |             |
|-----------------|---|-------------|-------------|------------|------------|-------------|
| 10/7/2013 4:40  | 0 | 264.4633776 | 264.4379728 | 264.440048 | 264.515664 | 264.4527664 |
| 10/7/2013 4:50  | 0 | 264.4630728 | 264.4409728 | 264.442048 | 264.516664 | 264.4537664 |
| 10/7/2013 5:00  | 0 | 264.4621584 | 264.4349728 | 264.438048 | 264.515664 | 264.4507664 |
| 10/7/2013 5:10  | 0 | 264.4621584 | 264.4349728 | 264.437048 | 264.517664 | 264.4497664 |
| 10/7/2013 5:20  | 0 | 264.4621584 | 264.4379728 | 264.438048 | 264.515664 | 264.4507664 |
| 10/7/2013 5:30  | 0 | 264.4615488 | 264.4359728 | 264.437048 | 264.513664 | 264.4487664 |
| 10/7/2013 5:40  | 0 | 264.461244  | 264.4359728 | 264.437048 | 264.517664 | 264.4507664 |
| 10/7/2013 5:50  | 0 | 264.4606344 | 264.4359728 | 264.436048 | 264.514664 | 264.4517664 |
| 10/7/2013 6:00  | 0 | 264.45972   | 264.4349728 | 264.434048 | 264.514664 | 264.4467664 |
| 10/7/2013 6:10  | 0 | 264.4600248 | 264.4379728 | 264.436048 | 264.516664 | 264.4497664 |
| 10/7/2013 6:20  | 0 | 264.45972   | 264.4369728 | 264.434048 | 264.511664 | 264.4487664 |
| 10/7/2013 6:30  | 0 | 264.45972   | 264.4369728 | 264.434048 | 264.513664 | 264.4487664 |
| 10/7/2013 6:40  | 0 | 264.4624632 | 264.4429728 | 264.435048 | 264.514664 | 264.4517664 |
| 10/7/2013 6:50  | 0 | 264.4624632 | 264.4439728 | 264.436048 | 264.511664 | 264.4487664 |
| 10/7/2013 7:00  | 0 | 264.461244  | 264.4399728 | 264.436048 | 264.511664 | 264.4487664 |
| 10/7/2013 7:10  | 0 | 264.4615488 | 264.4399728 | 264.437048 | 264.511664 | 264.4517664 |
| 10/7/2013 7:20  | 0 | 264.461244  | 264.4399728 | 264.437048 | 264.509664 | 264.4487664 |
| 10/7/2013 7:30  | 0 | 264.4630728 | 264.4449728 | 264.438048 | 264.511664 | 264.4507664 |
| 10/7/2013 7:40  | 0 | 264.4652064 | 264.4509728 | 264.440048 | 264.511664 | 264.4527664 |
| 10/7/2013 7:50  | 0 | 264.4667304 | 264.4489728 | 264.441048 | 264.510664 | 264.4527664 |
| 10/7/2013 8:00  | 0 | 264.4694736 | 264.4549728 | 264.441048 | 264.507664 | 264.4537664 |
| 10/7/2013 8:10  | 0 | 264.4722168 | 264.4559728 | 264.442048 | 264.507664 | 264.4537664 |
| 10/7/2013 8:20  | 0 | 264.4743504 | 264.4609728 | 264.446048 | 264.509664 | 264.4557664 |
| 10/7/2013 8:30  | 0 | 264.4770936 | 264.4629728 | 264.449048 | 264.506664 | 264.4577664 |
| 10/7/2013 8:40  | 0 | 264.4804464 | 264.4699728 | 264.451048 | 264.505664 | 264.4597664 |
| 10/7/2013 8:50  | 0 | 264.4822752 | 264.4719728 | 264.456048 | 264.507664 | 264.4607664 |
| 10/7/2013 9:00  | 0 | 264.4865424 | 264.4799728 | 264.459048 | 264.509664 | 264.4637664 |
| 10/7/2013 9:10  | 0 | 264.4874568 | 264.4819728 | 264.462048 | 264.509664 | 264.4637664 |
| 10/7/2013 9:20  | 0 | 264.4853232 | 264.4689728 | 264.463048 | 264.508664 | 264.4617664 |
| 10/7/2013 9:30  | 0 | 264.4874568 | 264.4769728 | 264.468048 | 264.507664 | 264.4667664 |
| 10/7/2013 9:40  | 0 | 264.4892856 | 264.4819728 | 264.467048 | 264.508664 | 264.4677664 |
| 10/7/2013 9:50  | 0 | 264.4883712 | 264.4789728 | 264.469048 | 264.506664 | 264.4647664 |
| 10/7/2013 10:00 | 0 | 264.4874568 | 264.4779728 | 264.472048 | 264.506664 | 264.4657664 |
| 10/7/2013 10:10 | 0 | 264.4874568 | 264.4789728 | 264.473048 | 264.508664 | 264.4657664 |
| 10/7/2013 10:20 | 0 | 264.4895904 | 264.4799728 | 264.471048 | 264.507664 | 264.4677664 |
| 10/7/2013 10:30 | 0 | 264.4892856 | 264.4799728 | 264.473048 | 264.508664 | 264.4677664 |
| 10/7/2013 10:40 | 0 | 264.4874568 | 264.4779728 | 264.474048 | 264.507664 | 264.4667664 |
| 10/7/2013 10:50 | 0 | 264.4868472 | 264.4749728 | 264.475048 | 264.509664 | 264.4647664 |
| 10/7/2013 11:00 | 0 | 264.4883712 | 264.4799728 | 264.476048 | 264.506664 | 264.4667664 |
| 10/7/2013 11:10 | 0 | 264.4859328 | 264.4769728 | 264.471048 | 264.503664 | 264.4647664 |
| 10/7/2013 11:20 | 0 | 264.4831896 | 264.4669728 | 264.471048 | 264.501664 | 264.4617664 |
| 10/7/2013 11:30 | 0 | 264.4822752 | 264.4679728 | 264.473048 | 264.505664 | 264.4607664 |
| 10/7/2013 11:40 | 0 | 264.4822752 | 264.4729728 | 264.473048 | 264.506664 | 264.4627664 |
| 10/7/2013 11:50 | 0 | 264.4807512 | 264.4729728 | 264.472048 | 264.506664 | 264.4607664 |
| 10/7/2013 12:00 | 0 | 264.4789224 | 264.4649728 | 264.469048 | 264.503664 | 264.4577664 |
| 10/7/2013 12:10 | 0 | 264.4792272 | 264.4679728 | 264.469048 | 264.504664 | 264.4607664 |
| 10/7/2013 12:20 | 0 | 264.4773984 | 264.4679728 | 264.468048 | 264.506664 | 264.4577664 |

|                 |   |             |             |            |            |             |
|-----------------|---|-------------|-------------|------------|------------|-------------|
| 10/7/2013 12:30 | 0 | 264.4761792 | 264.4649728 | 264.465048 | 264.503664 | 264.4557664 |
| 10/7/2013 12:40 | 0 | 264.476484  | 264.4649728 | 264.466048 | 264.503664 | 264.4557664 |
| 10/7/2013 12:50 | 0 | 264.476484  | 264.4649728 | 264.464048 | 264.501664 | 264.4557664 |
| 10/7/2013 13:00 | 0 | 264.4746552 | 264.4629728 | 264.465048 | 264.505664 | 264.4547664 |
| 10/7/2013 13:10 | 0 | 264.4731312 | 264.4579728 | 264.462048 | 264.500664 | 264.4517664 |
| 10/7/2013 13:20 | 0 | 264.4746552 | 264.4619728 | 264.464048 | 264.501664 | 264.4537664 |
| 10/7/2013 13:30 | 0 | 264.4737408 | 264.4639728 | 264.462048 | 264.503664 | 264.4547664 |
| 10/7/2013 13:40 | 0 | 264.471912  | 264.4599728 | 264.464048 | 264.504664 | 264.4537664 |
| 10/7/2013 13:50 | 0 | 264.4728264 | 264.4639728 | 264.461048 | 264.501664 | 264.4527664 |
| 10/7/2013 14:00 | 0 | 264.471912  | 264.4629728 | 264.460048 | 264.502664 | 264.4537664 |
| 10/7/2013 14:10 | 0 | 264.4706928 | 264.4599728 | 264.463048 | 264.503664 | 264.4517664 |
| 10/7/2013 14:20 | 0 | 264.470388  | 264.4599728 | 264.460048 | 264.500664 | 264.4527664 |
| 10/7/2013 14:30 | 0 | 264.4709976 | 264.4599728 | 264.459048 | 264.499664 | 264.4507664 |
| 10/7/2013 14:40 | 0 | 264.4694736 | 264.4579728 | 264.460048 | 264.500664 | 264.4527664 |
| 10/7/2013 14:50 | 0 | 264.4676448 | 264.4519728 | 264.457048 | 264.499664 | 264.4477664 |
| 10/7/2013 15:00 | 0 | 264.468864  | 264.4549728 | 264.456048 | 264.499664 | 264.4477664 |
| 10/7/2013 15:10 | 0 | 264.4691688 | 264.4569728 | 264.455048 | 264.499664 | 264.4497664 |
| 10/7/2013 15:20 | 0 | 264.4676448 | 264.4559728 | 264.456048 | 264.497664 | 264.4457664 |
| 10/7/2013 15:30 | 0 | 264.46734   | 264.4539728 | 264.456048 | 264.498664 | 264.4487664 |
| 10/7/2013 15:40 | 0 | 264.4676448 | 264.4549728 | 264.456048 | 264.497664 | 264.4487664 |
| 10/7/2013 15:50 | 0 | 264.4667304 | 264.4569728 | 264.458048 | 264.500664 | 264.4487664 |
| 10/7/2013 16:00 | 0 | 264.464292  | 264.4499728 | 264.455048 | 264.498664 | 264.4457664 |
| 10/7/2013 16:10 | 0 | 264.4633776 | 264.4469728 | 264.455048 | 264.498664 | 264.4467664 |
| 10/7/2013 16:20 | 0 | 264.4639872 | 264.4519728 | 264.452048 | 264.500664 | 264.4467664 |
| 10/7/2013 16:30 | 0 | 264.4633776 | 264.4519728 | 264.453048 | 264.498664 | 264.4467664 |
| 10/7/2013 16:40 | 0 | 264.461244  | 264.4449728 | 264.453048 | 264.500664 | 264.4447664 |
| 10/7/2013 16:50 | 0 | 264.462768  | 264.4519728 | 264.452048 | 264.498664 | 264.4467664 |
| 10/7/2013 17:00 | 0 | 264.462768  | 264.4499728 | 264.450048 | 264.495664 | 264.4437664 |
| 10/7/2013 17:10 | 0 | 264.4603296 | 264.4449728 | 264.450048 | 264.496664 | 264.4437664 |
| 10/7/2013 17:20 | 0 | 264.4618536 | 264.4469728 | 264.450048 | 264.495664 | 264.4417664 |
| 10/7/2013 17:30 | 0 | 264.462768  | 264.4519728 | 264.447048 | 264.495664 | 264.4437664 |
| 10/7/2013 17:40 | 0 | 264.4606344 | 264.4479728 | 264.448048 | 264.494664 | 264.4417664 |
| 10/7/2013 17:50 | 0 | 264.4603296 | 264.4419728 | 264.447048 | 264.493664 | 264.4417664 |
| 10/7/2013 18:00 | 0 | 264.462768  | 264.4519728 | 264.448048 | 264.494664 | 264.4447664 |
| 10/7/2013 18:10 | 0 | 264.4618536 | 264.4499728 | 264.448048 | 264.495664 | 264.4417664 |
| 10/7/2013 18:20 | 0 | 264.4609392 | 264.4449728 | 264.448048 | 264.494664 | 264.4437664 |
| 10/7/2013 18:30 | 0 | 264.4621584 | 264.4469728 | 264.447048 | 264.495664 | 264.4407664 |
| 10/7/2013 18:40 | 0 | 264.462768  | 264.4499728 | 264.447048 | 264.495664 | 264.4417664 |
| 10/7/2013 18:50 | 0 | 264.4609392 | 264.4479728 | 264.448048 | 264.494664 | 264.4437664 |
| 10/7/2013 19:00 | 0 | 264.462768  | 264.4499728 | 264.448048 | 264.494664 | 264.4437664 |
| 10/7/2013 19:10 | 0 | 264.4633776 | 264.4539728 | 264.447048 | 264.493664 | 264.4437664 |
| 10/7/2013 19:20 | 0 | 264.4630728 | 264.4519728 | 264.448048 | 264.495664 | 264.4457664 |
| 10/7/2013 19:30 | 0 | 264.4624632 | 264.4469728 | 264.448048 | 264.494664 | 264.4447664 |
| 10/7/2013 19:40 | 0 | 264.4645968 | 264.4559728 | 264.451048 | 264.492664 | 264.4447664 |
| 10/7/2013 19:50 | 0 | 264.4652064 | 264.4559728 | 264.451048 | 264.492664 | 264.4467664 |
| 10/7/2013 20:00 | 0 | 264.4652064 | 264.4539728 | 264.448048 | 264.493664 | 264.4447664 |
| 10/7/2013 20:10 | 0 | 264.4664256 | 264.4559728 | 264.449048 | 264.491664 | 264.4467664 |

|                 |   |             |             |            |            |             |
|-----------------|---|-------------|-------------|------------|------------|-------------|
| 10/7/2013 20:20 | 0 | 264.4682544 | 264.4599728 | 264.451048 | 264.491664 | 264.4487664 |
| 10/7/2013 20:30 | 0 | 264.4682544 | 264.4599728 | 264.451048 | 264.490664 | 264.4477664 |
| 10/7/2013 20:40 | 0 | 264.4676448 | 264.4579728 | 264.452048 | 264.492664 | 264.4477664 |
| 10/7/2013 20:50 | 0 | 264.4691688 | 264.4599728 | 264.455048 | 264.493664 | 264.4507664 |
| 10/7/2013 21:00 | 0 | 264.470388  | 264.4629728 | 264.453048 | 264.492664 | 264.4487664 |
| 10/7/2013 21:10 | 0 | 264.4713024 | 264.4679728 | 264.456048 | 264.492664 | 264.4507664 |
| 10/7/2013 21:20 | 0 | 264.4737408 | 264.4669728 | 264.457048 | 264.492664 | 264.4507664 |
| 10/7/2013 21:30 | 0 | 264.4728264 | 264.4669728 | 264.459048 | 264.490664 | 264.4527664 |
| 10/7/2013 21:40 | 0 | 264.4740456 | 264.4659728 | 264.457048 | 264.489664 | 264.4497664 |
| 10/7/2013 21:50 | 0 | 264.4716072 | 264.4649728 | 264.460048 | 264.492664 | 264.4497664 |
| 10/7/2013 22:00 | 0 | 264.4752648 | 264.4699728 | 264.461048 | 264.492664 | 264.4527664 |
| 10/7/2013 22:10 | 0 | 264.4755696 | 264.4699728 | 264.463048 | 264.491664 | 264.4547664 |
| 10/7/2013 22:20 | 0 | 264.4731312 | 264.4639728 | 264.461048 | 264.489664 | 264.4517664 |
| 10/7/2013 22:30 | 0 | 264.4746552 | 264.4669728 | 264.461048 | 264.491664 | 264.4547664 |
| 10/7/2013 22:40 | 0 | 264.4752648 | 264.4669728 | 264.462048 | 264.491664 | 264.4537664 |
| 10/7/2013 22:50 | 0 | 264.471912  | 264.4619728 | 264.464048 | 264.491664 | 264.4517664 |
| 10/7/2013 23:00 | 0 | 264.4731312 | 264.4659728 | 264.461048 | 264.489664 | 264.4537664 |
| 10/7/2013 23:10 | 0 | 264.471912  | 264.4639728 | 264.461048 | 264.491664 | 264.4517664 |
| 10/7/2013 23:20 | 0 | 264.4716072 | 264.4599728 | 264.458048 | 264.487664 | 264.4507664 |
| 10/7/2013 23:30 | 0 | 264.4716072 | 264.4629728 | 264.458048 | 264.488664 | 264.4487664 |
| 10/7/2013 23:40 | 0 | 264.4700832 | 264.4559728 | 264.457048 | 264.488664 | 264.4487664 |
| 10/7/2013 23:50 | 0 | 264.4694736 | 264.4599728 | 264.457048 | 264.490664 | 264.4497664 |
| 10/8/2013 0:00  | 0 | 264.4664256 | 264.4509728 | 264.457048 | 264.486664 | 264.4467664 |
| 10/8/2013 0:10  | 0 | 264.4667304 | 264.4579728 | 264.457048 | 264.488664 | 264.4497664 |
| 10/8/2013 0:20  | 0 | 264.464292  | 264.4539728 | 264.457048 | 264.489664 | 264.4467664 |
| 10/8/2013 0:30  | 0 | 264.4618536 | 264.4479728 | 264.453048 | 264.488664 | 264.4447664 |
| 10/8/2013 0:40  | 0 | 264.4606344 | 264.4419728 | 264.453048 | 264.488664 | 264.4417664 |
| 10/8/2013 0:50  | 0 | 264.4600248 | 264.4449728 | 264.450048 | 264.488664 | 264.4437664 |
| 10/8/2013 1:00  | 0 | 264.4585008 | 264.4449728 | 264.448048 | 264.488664 | 264.4417664 |
| 10/8/2013 1:10  | 0 | 264.4563672 | 264.4399728 | 264.446048 | 264.488664 | 264.4417664 |
| 10/8/2013 1:20  | 0 | 264.4548432 | 264.4349728 | 264.446048 | 264.488664 | 264.4417664 |
| 10/8/2013 1:30  | 0 | 264.4554528 | 264.4419728 | 264.444048 | 264.488664 | 264.4417664 |
| 10/8/2013 1:40  | 0 | 264.4530144 | 264.4349728 | 264.441048 | 264.487664 | 264.4347664 |
| 10/8/2013 1:50  | 0 | 264.450576  | 264.4269728 | 264.440048 | 264.488664 | 264.4367664 |
| 10/8/2013 2:00  | 0 | 264.450576  | 264.4299728 | 264.438048 | 264.490664 | 264.4367664 |
| 10/8/2013 2:10  | 0 | 264.4499664 | 264.4349728 | 264.437048 | 264.490664 | 264.4397664 |
| 10/8/2013 2:20  | 0 | 264.4469184 | 264.4239728 | 264.436048 | 264.487664 | 264.4347664 |
| 10/8/2013 2:30  | 0 | 264.4447848 | 264.4159728 | 264.429048 | 264.485664 | 264.4307664 |
| 10/8/2013 2:40  | 0 | 264.4447848 | 264.4199728 | 264.430048 | 264.486664 | 264.4327664 |
| 10/8/2013 2:50  | 0 | 264.4447848 | 264.4269728 | 264.429048 | 264.486664 | 264.4347664 |
| 10/8/2013 3:00  | 0 | 264.4417368 | 264.4169728 | 264.425048 | 264.485664 | 264.4297664 |
| 10/8/2013 3:10  | 0 | 264.439908  | 264.4119728 | 264.426048 | 264.486664 | 264.4297664 |
| 10/8/2013 3:20  | 0 | 264.4402128 | 264.4159728 | 264.424048 | 264.481664 | 264.4297664 |
| 10/8/2013 3:30  | 0 | 264.4392984 | 264.4209728 | 264.422048 | 264.485664 | 264.4297664 |
| 10/8/2013 3:40  | 0 | 264.43686   | 264.4109728 | 264.420048 | 264.482664 | 264.4257664 |
| 10/8/2013 3:50  | 0 | 264.4359456 | 264.4109728 | 264.420048 | 264.483664 | 264.4267664 |
| 10/8/2013 4:00  | 0 | 264.4356408 | 264.4119728 | 264.418048 | 264.483664 | 264.4267664 |

|                 |   |             |             |            |            |             |
|-----------------|---|-------------|-------------|------------|------------|-------------|
| 10/8/2013 4:10  | 0 | 264.4350312 | 264.4119728 | 264.416048 | 264.481664 | 264.4247664 |
| 10/8/2013 4:20  | 0 | 264.433812  | 264.4089728 | 264.414048 | 264.481664 | 264.4247664 |
| 10/8/2013 4:30  | 0 | 264.4341168 | 264.4129728 | 264.414048 | 264.482664 | 264.4237664 |
| 10/8/2013 4:40  | 0 | 264.4325928 | 264.4089728 | 264.413048 | 264.482664 | 264.4217664 |
| 10/8/2013 4:50  | 0 | 264.432288  | 264.4079728 | 264.412048 | 264.482664 | 264.4237664 |
| 10/8/2013 5:00  | 0 | 264.4316784 | 264.4059728 | 264.410048 | 264.480664 | 264.4217664 |
| 10/8/2013 5:10  | 0 | 264.4310688 | 264.4089728 | 264.410048 | 264.482664 | 264.4217664 |
| 10/8/2013 5:20  | 0 | 264.4304592 | 264.4079728 | 264.409048 | 264.479664 | 264.4207664 |
| 10/8/2013 5:30  | 0 | 264.4304592 | 264.4089728 | 264.410048 | 264.480664 | 264.4207664 |
| 10/8/2013 5:40  | 0 | 264.4304592 | 264.4079728 | 264.409048 | 264.479664 | 264.4187664 |
| 10/8/2013 5:50  | 0 | 264.4304592 | 264.4069728 | 264.409048 | 264.477664 | 264.4207664 |
| 10/8/2013 6:00  | 0 | 264.4298496 | 264.4079728 | 264.410048 | 264.479664 | 264.4207664 |
| 10/8/2013 6:10  | 0 | 264.4304592 | 264.4109728 | 264.409048 | 264.477664 | 264.4207664 |
| 10/8/2013 6:20  | 0 | 264.4304592 | 264.4079728 | 264.406048 | 264.476664 | 264.4197664 |
| 10/8/2013 6:30  | 0 | 264.4304592 | 264.4099728 | 264.407048 | 264.476664 | 264.4177664 |
| 10/8/2013 6:40  | 0 | 264.4310688 | 264.4149728 | 264.407048 | 264.479664 | 264.4207664 |
| 10/8/2013 6:50  | 0 | 264.4310688 | 264.4129728 | 264.407048 | 264.477664 | 264.4207664 |
| 10/8/2013 7:00  | 0 | 264.4341168 | 264.4199728 | 264.409048 | 264.476664 | 264.4227664 |
| 10/8/2013 7:10  | 0 | 264.4350312 | 264.4189728 | 264.409048 | 264.476664 | 264.4227664 |
| 10/8/2013 7:20  | 0 | 264.4359456 | 264.4219728 | 264.413048 | 264.476664 | 264.4227664 |
| 10/8/2013 7:30  | 0 | 264.43686   | 264.4249728 | 264.416048 | 264.481664 | 264.4277664 |
| 10/8/2013 7:40  | 0 | 264.4392984 | 264.4279728 | 264.417048 | 264.479664 | 264.4257664 |
| 10/8/2013 7:50  | 0 | 264.441432  | 264.4299728 | 264.418048 | 264.478664 | 264.4257664 |
| 10/8/2013 8:00  | 0 | 264.4447848 | 264.4379728 | 264.420048 | 264.478664 | 264.4297664 |
| 10/8/2013 8:10  | 0 | 264.4478328 | 264.4429728 | 264.424048 | 264.478664 | 264.4317664 |
| 10/8/2013 8:20  | 0 | 264.450576  | 264.4479728 | 264.428048 | 264.478664 | 264.4347664 |
| 10/8/2013 8:30  | 0 | 264.4545384 | 264.4529728 | 264.429048 | 264.478664 | 264.4367664 |
| 10/8/2013 8:40  | 0 | 264.4585008 | 264.4639728 | 264.436048 | 264.478664 | 264.4417664 |
| 10/8/2013 8:50  | 0 | 264.4600248 | 264.4579728 | 264.438048 | 264.478664 | 264.4387664 |
| 10/8/2013 9:00  | 0 | 264.4624632 | 264.4579728 | 264.444048 | 264.476664 | 264.4397664 |
| 10/8/2013 9:10  | 0 | 264.4645968 | 264.4629728 | 264.446048 | 264.476664 | 264.4437664 |
| 10/8/2013 9:20  | 0 | 264.4636824 | 264.4629728 | 264.449048 | 264.476664 | 264.4417664 |
| 10/8/2013 9:30  | 0 | 264.4649016 | 264.4629728 | 264.450048 | 264.476664 | 264.4437664 |
| 10/8/2013 9:40  | 0 | 264.465816  | 264.4629728 | 264.453048 | 264.475664 | 264.4427664 |
| 10/8/2013 9:50  | 0 | 264.46734   | 264.4629728 | 264.454048 | 264.475664 | 264.4437664 |
| 10/8/2013 10:00 | 0 | 264.468864  | 264.4679728 | 264.456048 | 264.478664 | 264.4467664 |
| 10/8/2013 10:10 | 0 | 264.4679496 | 264.4659728 | 264.456048 | 264.474664 | 264.4457664 |
| 10/8/2013 10:20 | 0 | 264.4664256 | 264.4579728 | 264.456048 | 264.476664 | 264.4447664 |
| 10/8/2013 10:30 | 0 | 264.4661208 | 264.4599728 | 264.456048 | 264.474664 | 264.4417664 |
| 10/8/2013 10:40 | 0 | 264.4645968 | 264.4589728 | 264.456048 | 264.474664 | 264.4427664 |
| 10/8/2013 10:50 | 0 | 264.4633776 | 264.4539728 | 264.453048 | 264.474664 | 264.4397664 |
| 10/8/2013 11:00 | 0 | 264.4636824 | 264.4559728 | 264.455048 | 264.472664 | 264.4407664 |
| 10/8/2013 11:10 | 0 | 264.4636824 | 264.4589728 | 264.456048 | 264.471664 | 264.4407664 |
| 10/8/2013 11:20 | 0 | 264.461244  | 264.4519728 | 264.455048 | 264.473664 | 264.4387664 |
| 10/8/2013 11:30 | 0 | 264.4588056 | 264.4489728 | 264.452048 | 264.473664 | 264.4387664 |
| 10/8/2013 11:40 | 0 | 264.4591104 | 264.4489728 | 264.451048 | 264.471664 | 264.4387664 |
| 10/8/2013 11:50 | 0 | 264.4591104 | 264.4519728 | 264.451048 | 264.474664 | 264.4367664 |

|                 |   |             |             |            |            |             |
|-----------------|---|-------------|-------------|------------|------------|-------------|
| 10/8/2013 12:00 | 0 | 264.4578912 | 264.4519728 | 264.452048 | 264.474664 | 264.4347664 |
| 10/8/2013 12:10 | 0 | 264.456672  | 264.4449728 | 264.448048 | 264.472664 | 264.4347664 |
| 10/8/2013 12:20 | 0 | 264.4569768 | 264.4459728 | 264.448048 | 264.472664 | 264.4347664 |
| 10/8/2013 12:30 | 0 | 264.456672  | 264.4479728 | 264.448048 | 264.472664 | 264.4347664 |
| 10/8/2013 12:40 | 0 | 264.4545384 | 264.4449728 | 264.447048 | 264.470664 | 264.4327664 |
| 10/8/2013 12:50 | 0 | 264.4539288 | 264.4429728 | 264.446048 | 264.470664 | 264.4327664 |
| 10/8/2013 13:00 | 0 | 264.4539288 | 264.4479728 | 264.447048 | 264.473664 | 264.4337664 |
| 10/8/2013 13:10 | 0 | 264.4514904 | 264.4439728 | 264.444048 | 264.471664 | 264.4307664 |
| 10/8/2013 13:20 | 0 | 264.4496616 | 264.4379728 | 264.445048 | 264.471664 | 264.4307664 |
| 10/8/2013 13:30 | 0 | 264.4514904 | 264.4469728 | 264.445048 | 264.474664 | 264.4327664 |
| 10/8/2013 13:40 | 0 | 264.4493568 | 264.4439728 | 264.442048 | 264.472664 | 264.4297664 |
| 10/8/2013 13:50 | 0 | 264.4481376 | 264.4409728 | 264.442048 | 264.469664 | 264.4307664 |
| 10/8/2013 14:00 | 0 | 264.449052  | 264.4409728 | 264.442048 | 264.469664 | 264.4287664 |
| 10/8/2013 14:10 | 0 | 264.4487472 | 264.4439728 | 264.442048 | 264.471664 | 264.4307664 |
| 10/8/2013 14:20 | 0 | 264.4472232 | 264.4399728 | 264.439048 | 264.469664 | 264.4277664 |
| 10/8/2013 14:30 | 0 | 264.4472232 | 264.4359728 | 264.439048 | 264.467664 | 264.4267664 |
| 10/8/2013 14:40 | 0 | 264.4481376 | 264.4399728 | 264.438048 | 264.469664 | 264.4257664 |
| 10/8/2013 14:50 | 0 | 264.447528  | 264.4419728 | 264.438048 | 264.466664 | 264.4267664 |
| 10/8/2013 15:00 | 0 | 264.446004  | 264.4359728 | 264.435048 | 264.468664 | 264.4247664 |
| 10/8/2013 15:10 | 0 | 264.446004  | 264.4359728 | 264.437048 | 264.468664 | 264.4267664 |
| 10/8/2013 15:20 | 0 | 264.4472232 | 264.4389728 | 264.435048 | 264.468664 | 264.4267664 |
| 10/8/2013 15:30 | 0 | 264.446004  | 264.4389728 | 264.435048 | 264.468664 | 264.4247664 |
| 10/8/2013 15:40 | 0 | 264.4441752 | 264.4349728 | 264.436048 | 264.469664 | 264.4257664 |
| 10/8/2013 15:50 | 0 | 264.4447848 | 264.4339728 | 264.434048 | 264.467664 | 264.4237664 |
| 10/8/2013 16:00 | 0 | 264.4447848 | 264.4389728 | 264.434048 | 264.466664 | 264.4257664 |
| 10/8/2013 16:10 | 0 | 264.442956  | 264.4339728 | 264.433048 | 264.468664 | 264.4227664 |
| 10/8/2013 16:20 | 0 | 264.4423464 | 264.4289728 | 264.433048 | 264.466664 | 264.4227664 |
| 10/8/2013 16:30 | 0 | 264.4438704 | 264.4379728 | 264.433048 | 264.469664 | 264.4217664 |
| 10/8/2013 16:40 | 0 | 264.4417368 | 264.4349728 | 264.432048 | 264.469664 | 264.4217664 |
| 10/8/2013 16:50 | 0 | 264.441432  | 264.4299728 | 264.434048 | 264.469664 | 264.4237664 |
| 10/8/2013 17:00 | 0 | 264.442956  | 264.4389728 | 264.432048 | 264.467664 | 264.4217664 |
| 10/8/2013 17:10 | 0 | 264.4417368 | 264.4359728 | 264.430048 | 264.466664 | 264.4207664 |
| 10/8/2013 17:20 | 0 | 264.439908  | 264.4289728 | 264.430048 | 264.467664 | 264.4217664 |
| 10/8/2013 17:30 | 0 | 264.442956  | 264.4369728 | 264.432048 | 264.466664 | 264.4237664 |
| 10/8/2013 17:40 | 0 | 264.441432  | 264.4349728 | 264.432048 | 264.469664 | 264.4237664 |
| 10/8/2013 17:50 | 0 | 264.4408224 | 264.4329728 | 264.433048 | 264.468664 | 264.4237664 |
| 10/8/2013 18:00 | 0 | 264.4432608 | 264.4379728 | 264.433048 | 264.469664 | 264.4257664 |
| 10/8/2013 18:10 | 0 | 264.4420416 | 264.4369728 | 264.430048 | 264.466664 | 264.4207664 |
| 10/8/2013 18:20 | 0 | 264.4420416 | 264.4339728 | 264.433048 | 264.466664 | 264.4227664 |
| 10/8/2013 18:30 | 0 | 264.4441752 | 264.4369728 | 264.433048 | 264.468664 | 264.4247664 |
| 10/8/2013 18:40 | 0 | 264.4438704 | 264.4389728 | 264.433048 | 264.467664 | 264.4227664 |
| 10/8/2013 18:50 | 0 | 264.442956  | 264.4359728 | 264.432048 | 264.467664 | 264.4227664 |
| 10/8/2013 19:00 | 0 | 264.4453944 | 264.4389728 | 264.432048 | 264.468664 | 264.4247664 |
| 10/8/2013 19:10 | 0 | 264.4456992 | 264.4439728 | 264.433048 | 264.466664 | 264.4277664 |
| 10/8/2013 19:20 | 0 | 264.4447848 | 264.4389728 | 264.434048 | 264.467664 | 264.4247664 |
| 10/8/2013 19:30 | 0 | 264.4466136 | 264.4399728 | 264.434048 | 264.465664 | 264.4247664 |
| 10/8/2013 19:40 | 0 | 264.4484424 | 264.4439728 | 264.434048 | 264.467664 | 264.4267664 |



|                 |   |             |             |            |            |             |
|-----------------|---|-------------|-------------|------------|------------|-------------|
| 10/8/2013 19:50 | 0 | 264.449052  | 264.4479728 | 264.438048 | 264.465664 | 264.4297664 |
| 10/8/2013 20:00 | 0 | 264.4487472 | 264.4449728 | 264.437048 | 264.464664 | 264.4287664 |
| 10/8/2013 20:10 | 0 | 264.4502712 | 264.4429728 | 264.436048 | 264.466664 | 264.4267664 |
| 10/8/2013 20:20 | 0 | 264.4521    | 264.4479728 | 264.438048 | 264.466664 | 264.4307664 |
| 10/8/2013 20:30 | 0 | 264.4508808 | 264.4469728 | 264.442048 | 264.466664 | 264.4307664 |
| 10/8/2013 20:40 | 0 | 264.4530144 | 264.4479728 | 264.440048 | 264.464664 | 264.4327664 |
| 10/8/2013 20:50 | 0 | 264.4542336 | 264.4529728 | 264.441048 | 264.464664 | 264.4327664 |
| 10/8/2013 21:00 | 0 | 264.4542336 | 264.4499728 | 264.442048 | 264.466664 | 264.4327664 |
| 10/8/2013 21:10 | 0 | 264.4560624 | 264.4539728 | 264.444048 | 264.467664 | 264.4327664 |
| 10/8/2013 21:20 | 0 | 264.4557576 | 264.4539728 | 264.445048 | 264.467664 | 264.4347664 |
| 10/8/2013 21:30 | 0 | 264.4578912 | 264.4549728 | 264.446048 | 264.467664 | 264.4367664 |
| 10/8/2013 21:40 | 0 | 264.4563672 | 264.4499728 | 264.448048 | 264.465664 | 264.4367664 |
| 10/8/2013 21:50 | 0 | 264.4578912 | 264.4559728 | 264.446048 | 264.465664 | 264.4357664 |
| 10/8/2013 22:00 | 0 | 264.4585008 | 264.4569728 | 264.450048 | 264.469664 | 264.4367664 |
| 10/8/2013 22:10 | 0 | 264.4591104 | 264.4569728 | 264.449048 | 264.465664 | 264.4367664 |
| 10/8/2013 22:20 | 0 | 264.4609392 | 264.4609728 | 264.450048 | 264.468664 | 264.4387664 |
| 10/8/2013 22:30 | 0 | 264.4600248 | 264.4539728 | 264.451048 | 264.466664 | 264.4367664 |
| 10/8/2013 22:40 | 0 | 264.4591104 | 264.4559728 | 264.451048 | 264.466664 | 264.4387664 |
| 10/8/2013 22:50 | 0 | 264.4591104 | 264.4559728 | 264.452048 | 264.467664 | 264.4387664 |
| 10/8/2013 23:00 | 0 | 264.4591104 | 264.4529728 | 264.450048 | 264.466664 | 264.4377664 |
| 10/8/2013 23:10 | 0 | 264.4569768 | 264.4509728 | 264.450048 | 264.466664 | 264.4357664 |
| 10/8/2013 23:20 | 0 | 264.4578912 | 264.4529728 | 264.450048 | 264.463664 | 264.4357664 |
| 10/8/2013 23:30 | 0 | 264.4563672 | 264.4479728 | 264.449048 | 264.463664 | 264.4357664 |
| 10/8/2013 23:40 | 0 | 264.4554528 | 264.4479728 | 264.447048 | 264.463664 | 264.4327664 |
| 10/8/2013 23:50 | 0 | 264.4539288 | 264.4449728 | 264.446048 | 264.461664 | 264.4347664 |
| 10/9/2013 0:00  | 0 | 264.4524048 | 264.4419728 | 264.446048 | 264.465664 | 264.4327664 |
| 10/9/2013 0:10  | 0 | 264.4517952 | 264.4429728 | 264.446048 | 264.463664 | 264.4327664 |
| 10/9/2013 0:20  | 0 | 264.449052  | 264.4399728 | 264.446048 | 264.463664 | 264.4307664 |
| 10/9/2013 0:30  | 0 | 264.4478328 | 264.4319728 | 264.443048 | 264.463664 | 264.4297664 |
| 10/9/2013 0:40  | 0 | 264.4466136 | 264.4369728 | 264.440048 | 264.460664 | 264.4277664 |
| 10/9/2013 0:50  | 0 | 264.4441752 | 264.4349728 | 264.441048 | 264.465664 | 264.4277664 |
| 10/9/2013 1:00  | 0 | 264.4417368 | 264.4289728 | 264.439048 | 264.464664 | 264.4277664 |
| 10/9/2013 1:10  | 0 | 264.4405176 | 264.4259728 | 264.437048 | 264.464664 | 264.4267664 |
| 10/9/2013 1:20  | 0 | 264.439908  | 264.4279728 | 264.434048 | 264.462664 | 264.4257664 |
| 10/9/2013 1:30  | 0 | 264.4386888 | 264.4329728 | 264.434048 | 264.464664 | 264.4237664 |
| 10/9/2013 1:40  | 0 | 264.4359456 | 264.4179728 | 264.428048 | 264.459664 | 264.4187664 |
| 10/9/2013 1:50  | 0 | 264.4356408 | 264.4219728 | 264.430048 | 264.461664 | 264.4227664 |
| 10/9/2013 2:00  | 0 | 264.4350312 | 264.4249728 | 264.427048 | 264.460664 | 264.4197664 |
| 10/9/2013 2:10  | 0 | 264.432288  | 264.4169728 | 264.424048 | 264.459664 | 264.4177664 |
| 10/9/2013 2:20  | 0 | 264.4298496 | 264.4079728 | 264.423048 | 264.459664 | 264.4167664 |
| 10/9/2013 2:30  | 0 | 264.4304592 | 264.4129728 | 264.422048 | 264.460664 | 264.4167664 |
| 10/9/2013 2:40  | 0 | 264.4298496 | 264.4159728 | 264.419048 | 264.459664 | 264.4167664 |
| 10/9/2013 2:50  | 0 | 264.4271064 | 264.4049728 | 264.416048 | 264.459664 | 264.4137664 |
| 10/9/2013 3:00  | 0 | 264.4289352 | 264.4139728 | 264.416048 | 264.460664 | 264.4167664 |
| 10/9/2013 3:10  | 0 | 264.4264968 | 264.4109728 | 264.414048 | 264.462664 | 264.4147664 |
| 10/9/2013 3:20  | 0 | 264.424668  | 264.4049728 | 264.412048 | 264.459664 | 264.4117664 |
| 10/9/2013 3:30  | 0 | 264.423144  | 264.3969728 | 264.410048 | 264.456664 | 264.4087664 |

|                 |   |             |             |            |            |             |
|-----------------|---|-------------|-------------|------------|------------|-------------|
| 10/9/2013 3:40  | 0 | 264.4228392 | 264.4019728 | 264.411048 | 264.460664 | 264.4107664 |
| 10/9/2013 3:50  | 0 | 264.4222296 | 264.4019728 | 264.407048 | 264.456664 | 264.4087664 |
| 10/9/2013 4:00  | 0 | 264.4213152 | 264.3999728 | 264.404048 | 264.456664 | 264.4107664 |
| 10/9/2013 4:10  | 0 | 264.4207056 | 264.3999728 | 264.405048 | 264.456664 | 264.4107664 |
| 10/9/2013 4:20  | 0 | 264.420096  | 264.4019728 | 264.405048 | 264.456664 | 264.4107664 |
| 10/9/2013 4:30  | 0 | 264.4197912 | 264.4019728 | 264.403048 | 264.455664 | 264.4087664 |
| 10/9/2013 4:40  | 0 | 264.4188768 | 264.3989728 | 264.401048 | 264.455664 | 264.4077664 |
| 10/9/2013 4:50  | 0 | 264.418572  | 264.3969728 | 264.401048 | 264.455664 | 264.4077664 |
| 10/9/2013 5:00  | 0 | 264.4176576 | 264.3939728 | 264.399048 | 264.454664 | 264.4047664 |
| 10/9/2013 5:10  | 0 | 264.417048  | 264.3989728 | 264.400048 | 264.455664 | 264.4057664 |
| 10/9/2013 5:20  | 0 | 264.4167432 | 264.3939728 | 264.397048 | 264.454664 | 264.4037664 |
| 10/9/2013 5:30  | 0 | 264.415524  | 264.3939728 | 264.399048 | 264.455664 | 264.4057664 |
| 10/9/2013 5:40  | 0 | 264.415524  | 264.3969728 | 264.399048 | 264.453664 | 264.4037664 |
| 10/9/2013 5:50  | 0 | 264.4152192 | 264.3969728 | 264.397048 | 264.453664 | 264.4037664 |
| 10/9/2013 6:00  | 0 | 264.4152192 | 264.3969728 | 264.396048 | 264.453664 | 264.4057664 |
| 10/9/2013 6:10  | 0 | 264.415524  | 264.3989728 | 264.396048 | 264.453664 | 264.4037664 |
| 10/9/2013 6:20  | 0 | 264.4149144 | 264.3969728 | 264.397048 | 264.453664 | 264.4057664 |
| 10/9/2013 6:30  | 0 | 264.4149144 | 264.3969728 | 264.396048 | 264.455664 | 264.4037664 |
| 10/9/2013 6:40  | 0 | 264.4158288 | 264.4019728 | 264.397048 | 264.451664 | 264.4037664 |
| 10/9/2013 6:50  | 0 | 264.417048  | 264.4019728 | 264.396048 | 264.451664 | 264.4057664 |
| 10/9/2013 7:00  | 0 | 264.4197912 | 264.4069728 | 264.396048 | 264.450664 | 264.4057664 |
| 10/9/2013 7:10  | 0 | 264.4204008 | 264.4049728 | 264.396048 | 264.450664 | 264.4057664 |
| 10/9/2013 7:20  | 0 | 264.4219248 | 264.4089728 | 264.399048 | 264.451664 | 264.4067664 |
| 10/9/2013 7:30  | 0 | 264.4237536 | 264.4169728 | 264.403048 | 264.451664 | 264.4107664 |
| 10/9/2013 7:40  | 0 | 264.4258872 | 264.4199728 | 264.404048 | 264.451664 | 264.4137664 |
| 10/9/2013 7:50  | 0 | 264.4286304 | 264.4199728 | 264.407048 | 264.450664 | 264.4147664 |
| 10/9/2013 8:00  | 0 | 264.4310688 | 264.4239728 | 264.408048 | 264.449664 | 264.4127664 |
| 10/9/2013 8:10  | 0 | 264.4295448 | 264.4159728 | 264.411048 | 264.451664 | 264.4127664 |
| 10/9/2013 8:20  | 0 | 264.4310688 | 264.4289728 | 264.412048 | 264.451664 | 264.4167664 |
| 10/9/2013 8:30  | 0 | 264.4423464 | 264.4549728 | 264.419048 | 264.449664 | 264.4257664 |
| 10/9/2013 8:40  | 0 | 264.4478328 | 264.4569728 | 264.427048 | 264.453664 | 264.4287664 |
| 10/9/2013 8:50  | 0 | 264.4469184 | 264.4409728 | 264.428048 | 264.448664 | 264.4257664 |
| 10/9/2013 9:00  | 0 | 264.4496616 | 264.4539728 | 264.432048 | 264.448664 | 264.4287664 |
| 10/9/2013 9:10  | 0 | 264.4517952 | 264.4569728 | 264.433048 | 264.448664 | 264.4297664 |
| 10/9/2013 9:20  | 0 | 264.4539288 | 264.4549728 | 264.437048 | 264.447664 | 264.4297664 |
| 10/9/2013 9:30  | 0 | 264.4554528 | 264.4509728 | 264.441048 | 264.449664 | 264.4317664 |
| 10/9/2013 9:40  | 0 | 264.4560624 | 264.4579728 | 264.444048 | 264.449664 | 264.4337664 |
| 10/9/2013 9:50  | 0 | 264.4557576 | 264.4549728 | 264.444048 | 264.449664 | 264.4337664 |
| 10/9/2013 10:00 | 0 | 264.458196  | 264.4629728 | 264.447048 | 264.449664 | 264.4367664 |
| 10/9/2013 10:10 | 0 | 264.4591104 | 264.4579728 | 264.448048 | 264.451664 | 264.4357664 |
| 10/9/2013 10:20 | 0 | 264.4591104 | 264.4599728 | 264.450048 | 264.449664 | 264.4357664 |
| 10/9/2013 10:30 | 0 | 264.4572816 | 264.4549728 | 264.451048 | 264.451664 | 264.4337664 |
| 10/9/2013 10:40 | 0 | 264.4569768 | 264.4529728 | 264.450048 | 264.451664 | 264.4337664 |
| 10/9/2013 10:50 | 0 | 264.4554528 | 264.4499728 | 264.447048 | 264.446664 | 264.4317664 |
| 10/9/2013 11:00 | 0 | 264.453624  | 264.4499728 | 264.448048 | 264.449664 | 264.4317664 |
| 10/9/2013 11:10 | 0 | 264.4548432 | 264.4539728 | 264.448048 | 264.450664 | 264.4337664 |
| 10/9/2013 11:20 | 0 | 264.4539288 | 264.4529728 | 264.448048 | 264.449664 | 264.4317664 |

|                 |   |             |             |            |            |             |
|-----------------|---|-------------|-------------|------------|------------|-------------|
| 10/9/2013 11:30 | 0 | 264.455148  | 264.4519728 | 264.448048 | 264.449664 | 264.4337664 |
| 10/9/2013 11:40 | 0 | 264.4521    | 264.4469728 | 264.448048 | 264.449664 | 264.4317664 |
| 10/9/2013 11:50 | 0 | 264.4514904 | 264.4449728 | 264.447048 | 264.449664 | 264.4317664 |
| 10/9/2013 12:00 | 0 | 264.4499664 | 264.4449728 | 264.444048 | 264.447664 | 264.4297664 |
| 10/9/2013 12:10 | 0 | 264.4472232 | 264.4369728 | 264.443048 | 264.448664 | 264.4247664 |
| 10/9/2013 12:20 | 0 | 264.447528  | 264.4399728 | 264.442048 | 264.449664 | 264.4277664 |
| 10/9/2013 12:30 | 0 | 264.4447848 | 264.4369728 | 264.440048 | 264.449664 | 264.4247664 |
| 10/9/2013 12:40 | 0 | 264.442956  | 264.4319728 | 264.440048 | 264.449664 | 264.4227664 |
| 10/9/2013 12:50 | 0 | 264.4435656 | 264.4359728 | 264.439048 | 264.450664 | 264.4237664 |
| 10/9/2013 13:00 | 0 | 264.4420416 | 264.4379728 | 264.436048 | 264.446664 | 264.4207664 |
| 10/9/2013 13:10 | 0 | 264.4408224 | 264.4309728 | 264.434048 | 264.446664 | 264.4187664 |
| 10/9/2013 13:20 | 0 | 264.4411272 | 264.4359728 | 264.435048 | 264.447664 | 264.4217664 |
| 10/9/2013 13:30 | 0 | 264.4405176 | 264.4369728 | 264.434048 | 264.447664 | 264.4217664 |
| 10/9/2013 13:40 | 0 | 264.4389936 | 264.4289728 | 264.434048 | 264.450664 | 264.4207664 |
| 10/9/2013 13:50 | 0 | 264.4402128 | 264.4349728 | 264.433048 | 264.447664 | 264.4217664 |
| 10/9/2013 14:00 | 0 | 264.4374696 | 264.4289728 | 264.431048 | 264.446664 | 264.4197664 |
| 10/9/2013 14:10 | 0 | 264.4371648 | 264.4299728 | 264.430048 | 264.446664 | 264.4177664 |
| 10/9/2013 14:20 | 0 | 264.4374696 | 264.4299728 | 264.431048 | 264.447664 | 264.4207664 |
| 10/9/2013 14:30 | 0 | 264.43686   | 264.4339728 | 264.432048 | 264.448664 | 264.4197664 |
| 10/9/2013 14:40 | 0 | 264.4344216 | 264.4249728 | 264.427048 | 264.446664 | 264.4137664 |
| 10/9/2013 14:50 | 0 | 264.435336  | 264.4279728 | 264.427048 | 264.447664 | 264.4167664 |
| 10/9/2013 15:00 | 0 | 264.4328976 | 264.4259728 | 264.426048 | 264.445664 | 264.4137664 |
| 10/9/2013 15:10 | 0 | 264.4313736 | 264.4219728 | 264.426048 | 264.446664 | 264.4127664 |
| 10/9/2013 15:20 | 0 | 264.4313736 | 264.4239728 | 264.424048 | 264.445664 | 264.4147664 |
| 10/9/2013 15:30 | 0 | 264.4316784 | 264.4269728 | 264.424048 | 264.445664 | 264.4107664 |
| 10/9/2013 15:40 | 0 | 264.4304592 | 264.4239728 | 264.424048 | 264.444664 | 264.4107664 |
| 10/9/2013 15:50 | 0 | 264.4313736 | 264.4219728 | 264.421048 | 264.443664 | 264.4097664 |
| 10/9/2013 16:00 | 0 | 264.4347264 | 264.4319728 | 264.422048 | 264.444664 | 264.4117664 |
| 10/9/2013 16:10 | 0 | 264.4304592 | 264.4229728 | 264.424048 | 264.445664 | 264.4117664 |
| 10/9/2013 16:20 | 0 | 264.42924   | 264.4149728 | 264.420048 | 264.445664 | 264.4087664 |
| 10/9/2013 16:30 | 0 | 264.4304592 | 264.4269728 | 264.421048 | 264.444664 | 264.4097664 |
| 10/9/2013 16:40 | 0 | 264.4280208 | 264.4199728 | 264.418048 | 264.442664 | 264.4087664 |
| 10/9/2013 16:50 | 0 | 264.4298496 | 264.4219728 | 264.420048 | 264.445664 | 264.4077664 |
| 10/9/2013 17:00 | 0 | 264.4301544 | 264.4249728 | 264.419048 | 264.442664 | 264.4087664 |
| 10/9/2013 17:10 | 0 | 264.4298496 | 264.4229728 | 264.420048 | 264.443664 | 264.4097664 |
| 10/9/2013 17:20 | 0 | 264.4344216 | 264.4379728 | 264.423048 | 264.445664 | 264.4147664 |
| 10/9/2013 17:30 | 0 | 264.4350312 | 264.4359728 | 264.423048 | 264.445664 | 264.4127664 |
| 10/9/2013 17:40 | 0 | 264.433812  | 264.4229728 | 264.421048 | 264.442664 | 264.4117664 |
| 10/9/2013 17:50 | 0 | 264.4335072 | 264.4299728 | 264.423048 | 264.445664 | 264.4127664 |
| 10/9/2013 18:00 | 0 | 264.4316784 | 264.4249728 | 264.421048 | 264.442664 | 264.4097664 |
| 10/9/2013 18:10 | 0 | 264.430764  | 264.4229728 | 264.421048 | 264.443664 | 264.4097664 |
| 10/9/2013 18:20 | 0 | 264.4328976 | 264.4279728 | 264.424048 | 264.445664 | 264.4127664 |
| 10/9/2013 18:30 | 0 | 264.432288  | 264.4299728 | 264.423048 | 264.445664 | 264.4127664 |
| 10/9/2013 18:40 | 0 | 264.4319832 | 264.4249728 | 264.421048 | 264.445664 | 264.4117664 |
| 10/9/2013 18:50 | 0 | 264.4325928 | 264.4269728 | 264.421048 | 264.443664 | 264.4117664 |
| 10/9/2013 19:00 | 0 | 264.435336  | 264.4349728 | 264.421048 | 264.443664 | 264.4147664 |
| 10/9/2013 19:10 | 0 | 264.4347264 | 264.4309728 | 264.423048 | 264.445664 | 264.4147664 |

|                 |   |             |             |            |            |             |
|-----------------|---|-------------|-------------|------------|------------|-------------|
| 10/9/2013 19:20 | 0 | 264.43686   | 264.4319728 | 264.423048 | 264.442664 | 264.4147664 |
| 10/9/2013 19:30 | 0 | 264.4374696 | 264.4379728 | 264.425048 | 264.443664 | 264.4167664 |
| 10/9/2013 19:40 | 0 | 264.4380792 | 264.4359728 | 264.428048 | 264.443664 | 264.4167664 |
| 10/9/2013 19:50 | 0 | 264.4389936 | 264.4399728 | 264.428048 | 264.440664 | 264.4167664 |
| 10/9/2013 20:00 | 0 | 264.4392984 | 264.4329728 | 264.425048 | 264.442664 | 264.4167664 |
| 10/9/2013 20:10 | 0 | 264.4405176 | 264.4409728 | 264.429048 | 264.443664 | 264.4217664 |
| 10/9/2013 20:20 | 0 | 264.4423464 | 264.4419728 | 264.429048 | 264.442664 | 264.4207664 |
| 10/9/2013 20:30 | 0 | 264.4417368 | 264.4399728 | 264.431048 | 264.440664 | 264.4207664 |
| 10/9/2013 20:40 | 0 | 264.44448   | 264.4449728 | 264.432048 | 264.442664 | 264.4227664 |
| 10/9/2013 20:50 | 0 | 264.4450896 | 264.4419728 | 264.432048 | 264.441664 | 264.4207664 |
| 10/9/2013 21:00 | 0 | 264.4456992 | 264.4439728 | 264.435048 | 264.440664 | 264.4227664 |
| 10/9/2013 21:10 | 0 | 264.4456992 | 264.4439728 | 264.435048 | 264.442664 | 264.4227664 |
| 10/9/2013 21:20 | 0 | 264.4466136 | 264.4459728 | 264.436048 | 264.443664 | 264.4227664 |
| 10/9/2013 21:30 | 0 | 264.447528  | 264.4479728 | 264.434048 | 264.440664 | 264.4247664 |
| 10/9/2013 21:40 | 0 | 264.449052  | 264.4509728 | 264.440048 | 264.443664 | 264.4267664 |
| 10/9/2013 21:50 | 0 | 264.4496616 | 264.4509728 | 264.440048 | 264.442664 | 264.4267664 |
| 10/9/2013 22:00 | 0 | 264.4511856 | 264.4509728 | 264.440048 | 264.442664 | 264.4287664 |
| 10/9/2013 22:10 | 0 | 264.4517952 | 264.4539728 | 264.441048 | 264.443664 | 264.4297664 |
| 10/9/2013 22:20 | 0 | 264.4521    | 264.4509728 | 264.443048 | 264.442664 | 264.4307664 |
| 10/9/2013 22:30 | 0 | 264.4521    | 264.4509728 | 264.444048 | 264.442664 | 264.4287664 |
| 10/9/2013 22:40 | 0 | 264.4521    | 264.4509728 | 264.445048 | 264.442664 | 264.4297664 |
| 10/9/2013 22:50 | 0 | 264.4517952 | 264.4489728 | 264.445048 | 264.443664 | 264.4297664 |
| 10/9/2013 23:00 | 0 | 264.4511856 | 264.4469728 | 264.445048 | 264.443664 | 264.4297664 |
| 10/9/2013 23:10 | 0 | 264.450576  | 264.4459728 | 264.443048 | 264.441664 | 264.4277664 |
| 10/9/2013 23:20 | 0 | 264.4496616 | 264.4459728 | 264.441048 | 264.443664 | 264.4277664 |
| 10/9/2013 23:30 | 0 | 264.4487472 | 264.4429728 | 264.441048 | 264.440664 | 264.4287664 |
| 10/9/2013 23:40 | 0 | 264.4472232 | 264.4399728 | 264.440048 | 264.440664 | 264.4237664 |
| 10/9/2013 23:50 | 0 | 264.4466136 | 264.4379728 | 264.439048 | 264.440664 | 264.4247664 |
| 10/10/2013 0:00 | 0 | 264.446004  | 264.4379728 | 264.439048 | 264.440664 | 264.4227664 |
| 10/10/2013 0:10 | 0 | 264.44448   | 264.4359728 | 264.437048 | 264.440664 | 264.4247664 |
| 10/10/2013 0:20 | 0 | 264.4426512 | 264.4299728 | 264.439048 | 264.442664 | 264.4227664 |
| 10/10/2013 0:30 | 0 | 264.441432  | 264.4309728 | 264.436048 | 264.442664 | 264.4237664 |
| 10/10/2013 0:40 | 0 | 264.4386888 | 264.4219728 | 264.433048 | 264.439664 | 264.4207664 |
| 10/10/2013 0:50 | 0 | 264.438384  | 264.4279728 | 264.433048 | 264.441664 | 264.4217664 |
| 10/10/2013 1:00 | 0 | 264.4350312 | 264.4239728 | 264.432048 | 264.439664 | 264.4177664 |
| 10/10/2013 1:10 | 0 | 264.4344216 | 264.4209728 | 264.430048 | 264.440664 | 264.4177664 |
| 10/10/2013 1:20 | 0 | 264.4328976 | 264.4239728 | 264.428048 | 264.441664 | 264.4187664 |
| 10/10/2013 1:30 | 0 | 264.4298496 | 264.4139728 | 264.424048 | 264.436664 | 264.4127664 |
| 10/10/2013 1:40 | 0 | 264.4283256 | 264.4109728 | 264.424048 | 264.440664 | 264.4127664 |
| 10/10/2013 1:50 | 0 | 264.4286304 | 264.4169728 | 264.421048 | 264.438664 | 264.4127664 |
| 10/10/2013 2:00 | 0 | 264.4240584 | 264.4039728 | 264.418048 | 264.438664 | 264.4077664 |
| 10/10/2013 2:10 | 0 | 264.424668  | 264.4069728 | 264.418048 | 264.439664 | 264.4107664 |
| 10/10/2013 2:20 | 0 | 264.4219248 | 264.4079728 | 264.414048 | 264.438664 | 264.4077664 |
| 10/10/2013 2:30 | 0 | 264.420096  | 264.3989728 | 264.413048 | 264.439664 | 264.4057664 |
| 10/10/2013 2:40 | 0 | 264.4194864 | 264.4059728 | 264.409048 | 264.436664 | 264.4057664 |
| 10/10/2013 2:50 | 0 | 264.417048  | 264.3979728 | 264.406048 | 264.436664 | 264.4057664 |
| 10/10/2013 3:00 | 0 | 264.4167432 | 264.4009728 | 264.408048 | 264.437664 | 264.4057664 |

|                  |   |             |             |            |            |             |
|------------------|---|-------------|-------------|------------|------------|-------------|
| 10/10/2013 3:10  | 0 | 264.4143048 | 264.3939728 | 264.405048 | 264.436664 | 264.4037664 |
| 10/10/2013 3:20  | 0 | 264.414     | 264.3959728 | 264.402048 | 264.437664 | 264.4037664 |
| 10/10/2013 3:30  | 0 | 264.4146096 | 264.3989728 | 264.401048 | 264.436664 | 264.4017664 |
| 10/10/2013 3:40  | 0 | 264.4130856 | 264.3929728 | 264.398048 | 264.436664 | 264.4007664 |
| 10/10/2013 3:50  | 0 | 264.4121712 | 264.3929728 | 264.396048 | 264.435664 | 264.3977664 |
| 10/10/2013 4:00  | 0 | 264.4118664 | 264.3949728 | 264.396048 | 264.438664 | 264.4027664 |
| 10/10/2013 4:10  | 0 | 264.4112568 | 264.3919728 | 264.396048 | 264.436664 | 264.3987664 |
| 10/10/2013 4:20  | 0 | 264.4106472 | 264.3929728 | 264.393048 | 264.436664 | 264.3987664 |
| 10/10/2013 4:30  | 0 | 264.4103424 | 264.3929728 | 264.394048 | 264.434664 | 264.3987664 |
| 10/10/2013 4:40  | 0 | 264.4097328 | 264.3929728 | 264.393048 | 264.434664 | 264.3967664 |
| 10/10/2013 4:50  | 0 | 264.409428  | 264.3909728 | 264.392048 | 264.438664 | 264.3967664 |
| 10/10/2013 5:00  | 0 | 264.409428  | 264.3929728 | 264.393048 | 264.438664 | 264.4007664 |
| 10/10/2013 5:10  | 0 | 264.4085136 | 264.3929728 | 264.393048 | 264.434664 | 264.3987664 |
| 10/10/2013 5:20  | 0 | 264.4082088 | 264.3919728 | 264.393048 | 264.435664 | 264.3977664 |
| 10/10/2013 5:30  | 0 | 264.407904  | 264.3899728 | 264.392048 | 264.433664 | 264.3967664 |
| 10/10/2013 5:40  | 0 | 264.4075992 | 264.3909728 | 264.390048 | 264.436664 | 264.3967664 |
| 10/10/2013 5:50  | 0 | 264.4072944 | 264.3909728 | 264.389048 | 264.433664 | 264.3967664 |
| 10/10/2013 6:00  | 0 | 264.4072944 | 264.3929728 | 264.390048 | 264.431664 | 264.3967664 |
| 10/10/2013 6:10  | 0 | 264.4072944 | 264.3929728 | 264.390048 | 264.431664 | 264.3967664 |
| 10/10/2013 6:20  | 0 | 264.4072944 | 264.3959728 | 264.390048 | 264.431664 | 264.3967664 |
| 10/10/2013 6:30  | 0 | 264.4075992 | 264.3959728 | 264.390048 | 264.433664 | 264.3967664 |
| 10/10/2013 6:40  | 0 | 264.4085136 | 264.3979728 | 264.390048 | 264.431664 | 264.3967664 |
| 10/10/2013 6:50  | 0 | 264.4100376 | 264.4009728 | 264.390048 | 264.431664 | 264.3987664 |
| 10/10/2013 7:00  | 0 | 264.4112568 | 264.4009728 | 264.392048 | 264.433664 | 264.3987664 |
| 10/10/2013 7:10  | 0 | 264.4149144 | 264.4109728 | 264.393048 | 264.431664 | 264.4007664 |
| 10/10/2013 7:20  | 0 | 264.4167432 | 264.4109728 | 264.394048 | 264.431664 | 264.4017664 |
| 10/10/2013 7:30  | 0 | 264.4164384 | 264.4059728 | 264.396048 | 264.429664 | 264.4007664 |
| 10/10/2013 7:40  | 0 | 264.418572  | 264.4109728 | 264.398048 | 264.431664 | 264.4017664 |
| 10/10/2013 7:50  | 0 | 264.4204008 | 264.4139728 | 264.401048 | 264.429664 | 264.4037664 |
| 10/10/2013 8:00  | 0 | 264.4249728 | 264.4239728 | 264.401048 | 264.431664 | 264.4057664 |
| 10/10/2013 8:10  | 0 | 264.4271064 | 264.4269728 | 264.404048 | 264.428664 | 264.4057664 |
| 10/10/2013 8:20  | 0 | 264.4304592 | 264.4289728 | 264.409048 | 264.427664 | 264.4107664 |
| 10/10/2013 8:30  | 0 | 264.4341168 | 264.4369728 | 264.412048 | 264.429664 | 264.4137664 |
| 10/10/2013 8:40  | 0 | 264.4362504 | 264.4399728 | 264.416048 | 264.431664 | 264.4137664 |
| 10/10/2013 8:50  | 0 | 264.4386888 | 264.4369728 | 264.419048 | 264.429664 | 264.4137664 |
| 10/10/2013 9:00  | 0 | 264.4435656 | 264.4499728 | 264.424048 | 264.432664 | 264.4217664 |
| 10/10/2013 9:10  | 0 | 264.447528  | 264.4559728 | 264.428048 | 264.430664 | 264.4237664 |
| 10/10/2013 9:20  | 0 | 264.4487472 | 264.4509728 | 264.429048 | 264.430664 | 264.4217664 |
| 10/10/2013 9:30  | 0 | 264.4493568 | 264.4489728 | 264.435048 | 264.430664 | 264.4247664 |
| 10/10/2013 9:40  | 0 | 264.4508808 | 264.4539728 | 264.438048 | 264.428664 | 264.4247664 |
| 10/10/2013 9:50  | 0 | 264.4508808 | 264.4529728 | 264.439048 | 264.432664 | 264.4247664 |
| 10/10/2013 10:00 | 0 | 264.4517952 | 264.4529728 | 264.440048 | 264.430664 | 264.4267664 |
| 10/10/2013 10:10 | 0 | 264.453624  | 264.4529728 | 264.440048 | 264.427664 | 264.4257664 |
| 10/10/2013 10:20 | 0 | 264.4521    | 264.4489728 | 264.441048 | 264.429664 | 264.4257664 |
| 10/10/2013 10:30 | 0 | 264.450576  | 264.4439728 | 264.441048 | 264.429664 | 264.4227664 |
| 10/10/2013 10:40 | 0 | 264.4499664 | 264.4459728 | 264.443048 | 264.432664 | 264.4267664 |
| 10/10/2013 10:50 | 0 | 264.4502712 | 264.4499728 | 264.443048 | 264.432664 | 264.4267664 |

|                  |   |             |             |            |            |             |
|------------------|---|-------------|-------------|------------|------------|-------------|
| 10/10/2013 11:00 | 0 | 264.450576  | 264.4449728 | 264.443048 | 264.428664 | 264.4267664 |
| 10/10/2013 11:10 | 0 | 264.4481376 | 264.4449728 | 264.440048 | 264.428664 | 264.4247664 |
| 10/10/2013 11:20 | 0 | 264.4478328 | 264.4449728 | 264.441048 | 264.428664 | 264.4237664 |
| 10/10/2013 11:30 | 0 | 264.449052  | 264.4459728 | 264.439048 | 264.428664 | 264.4267664 |
| 10/10/2013 11:40 | 0 | 264.4481376 | 264.4429728 | 264.441048 | 264.427664 | 264.4247664 |
| 10/10/2013 11:50 | 0 | 264.446004  | 264.4439728 | 264.442048 | 264.430664 | 264.4257664 |
| 10/10/2013 12:00 | 0 | 264.4438704 | 264.4359728 | 264.441048 | 264.430664 | 264.4237664 |
| 10/10/2013 12:10 | 0 | 264.4426512 | 264.4399728 | 264.438048 | 264.430664 | 264.4217664 |
| 10/10/2013 12:20 | 0 | 264.4405176 | 264.4349728 | 264.439048 | 264.433664 | 264.4227664 |
| 10/10/2013 12:30 | 0 | 264.4402128 | 264.4389728 | 264.434048 | 264.430664 | 264.4197664 |
| 10/10/2013 12:40 | 0 | 264.438384  | 264.4259728 | 264.433048 | 264.428664 | 264.4147664 |
| 10/10/2013 12:50 | 0 | 264.4389936 | 264.4379728 | 264.434048 | 264.429664 | 264.4197664 |
| 10/10/2013 13:00 | 0 | 264.43686   | 264.4299728 | 264.434048 | 264.430664 | 264.4177664 |
| 10/10/2013 13:10 | 0 | 264.4377744 | 264.4359728 | 264.433048 | 264.430664 | 264.4167664 |
| 10/10/2013 13:20 | 0 | 264.4356408 | 264.4289728 | 264.433048 | 264.429664 | 264.4147664 |
| 10/10/2013 13:30 | 0 | 264.4371648 | 264.4339728 | 264.432048 | 264.429664 | 264.4167664 |
| 10/10/2013 13:40 | 0 | 264.435336  | 264.4299728 | 264.429048 | 264.429664 | 264.4157664 |
| 10/10/2013 13:50 | 0 | 264.433812  | 264.4229728 | 264.429048 | 264.428664 | 264.4137664 |
| 10/10/2013 14:00 | 0 | 264.4347264 | 264.4319728 | 264.429048 | 264.429664 | 264.4167664 |
| 10/10/2013 14:10 | 0 | 264.4325928 | 264.4239728 | 264.429048 | 264.428664 | 264.4127664 |
| 10/10/2013 14:20 | 0 | 264.433812  | 264.4319728 | 264.428048 | 264.428664 | 264.4147664 |
| 10/10/2013 14:30 | 0 | 264.432288  | 264.4249728 | 264.428048 | 264.426664 | 264.4127664 |
| 10/10/2013 14:40 | 0 | 264.433812  | 264.4319728 | 264.427048 | 264.426664 | 264.4127664 |
| 10/10/2013 14:50 | 0 | 264.4328976 | 264.4309728 | 264.430048 | 264.429664 | 264.4137664 |
| 10/10/2013 15:00 | 0 | 264.4310688 | 264.4259728 | 264.427048 | 264.429664 | 264.4117664 |
| 10/10/2013 15:10 | 0 | 264.4328976 | 264.4279728 | 264.426048 | 264.429664 | 264.4127664 |
| 10/10/2013 15:20 | 0 | 264.4304592 | 264.4259728 | 264.424048 | 264.427664 | 264.4077664 |
| 10/10/2013 15:30 | 0 | 264.4316784 | 264.4259728 | 264.424048 | 264.426664 | 264.4107664 |
| 10/10/2013 15:40 | 0 | 264.4310688 | 264.4319728 | 264.426048 | 264.427664 | 264.4117664 |
| 10/10/2013 15:50 | 0 | 264.4298496 | 264.4269728 | 264.425048 | 264.430664 | 264.4097664 |
| 10/10/2013 16:00 | 0 | 264.4313736 | 264.4289728 | 264.423048 | 264.425664 | 264.4087664 |
| 10/10/2013 16:10 | 0 | 264.4301544 | 264.4269728 | 264.423048 | 264.427664 | 264.4087664 |
| 10/10/2013 16:20 | 0 | 264.4289352 | 264.4219728 | 264.423048 | 264.428664 | 264.4077664 |
| 10/10/2013 16:30 | 0 | 264.4295448 | 264.4269728 | 264.423048 | 264.425664 | 264.4087664 |
| 10/10/2013 16:40 | 0 | 264.4274112 | 264.4249728 | 264.423048 | 264.428664 | 264.4077664 |
| 10/10/2013 16:50 | 0 | 264.4249728 | 264.4139728 | 264.421048 | 264.427664 | 264.4047664 |
| 10/10/2013 17:00 | 0 | 264.424668  | 264.4169728 | 264.421048 | 264.428664 | 264.4047664 |
| 10/10/2013 17:10 | 0 | 264.4228392 | 264.4159728 | 264.419048 | 264.428664 | 264.4027664 |
| 10/10/2013 17:20 | 0 | 264.4234488 | 264.4129728 | 264.417048 | 264.425664 | 264.4027664 |
| 10/10/2013 17:30 | 0 | 264.426192  | 264.4279728 | 264.419048 | 264.428664 | 264.4057664 |
| 10/10/2013 17:40 | 0 | 264.426192  | 264.4209728 | 264.418048 | 264.428664 | 264.4027664 |
| 10/10/2013 17:50 | 0 | 264.4286304 | 264.4229728 | 264.418048 | 264.426664 | 264.4057664 |
| 10/10/2013 18:00 | 0 | 264.4298496 | 264.4309728 | 264.419048 | 264.428664 | 264.4087664 |
| 10/10/2013 18:10 | 0 | 264.4295448 | 264.4289728 | 264.421048 | 264.428664 | 264.4087664 |
| 10/10/2013 18:20 | 0 | 264.4304592 | 264.4269728 | 264.422048 | 264.425664 | 264.4097664 |
| 10/10/2013 18:30 | 0 | 264.4319832 | 264.4339728 | 264.423048 | 264.427664 | 264.4117664 |
| 10/10/2013 18:40 | 0 | 264.430764  | 264.4319728 | 264.422048 | 264.429664 | 264.4087664 |

|                  |   |             |             |            |            |             |
|------------------|---|-------------|-------------|------------|------------|-------------|
| 10/10/2013 18:50 | 0 | 264.4319832 | 264.4319728 | 264.423048 | 264.427664 | 264.4117664 |
| 10/10/2013 19:00 | 0 | 264.4313736 | 264.4339728 | 264.423048 | 264.427664 | 264.4097664 |
| 10/10/2013 19:10 | 0 | 264.432288  | 264.4289728 | 264.425048 | 264.427664 | 264.4097664 |
| 10/10/2013 19:20 | 0 | 264.4332024 | 264.4309728 | 264.423048 | 264.429664 | 264.4117664 |
| 10/10/2013 19:30 | 0 | 264.4313736 | 264.4289728 | 264.423048 | 264.431664 | 264.4097664 |
| 10/10/2013 19:40 | 0 | 264.4332024 | 264.4309728 | 264.425048 | 264.426664 | 264.4127664 |
| 10/10/2013 19:50 | 0 | 264.4344216 | 264.4339728 | 264.425048 | 264.428664 | 264.4137664 |
| 10/10/2013 20:00 | 0 | 264.433812  | 264.4289728 | 264.427048 | 264.426664 | 264.4127664 |
| 10/10/2013 20:10 | 0 | 264.4362504 | 264.4369728 | 264.427048 | 264.428664 | 264.4137664 |
| 10/10/2013 20:20 | 0 | 264.435336  | 264.4359728 | 264.427048 | 264.428664 | 264.4137664 |
| 10/10/2013 20:30 | 0 | 264.4374696 | 264.4369728 | 264.427048 | 264.426664 | 264.4157664 |
| 10/10/2013 20:40 | 0 | 264.4377744 | 264.4419728 | 264.432048 | 264.427664 | 264.4167664 |
| 10/10/2013 20:50 | 0 | 264.4408224 | 264.4459728 | 264.433048 | 264.428664 | 264.4197664 |
| 10/10/2013 21:00 | 0 | 264.4405176 | 264.4369728 | 264.430048 | 264.425664 | 264.4167664 |
| 10/10/2013 21:10 | 0 | 264.4423464 | 264.4459728 | 264.434048 | 264.426664 | 264.4217664 |
| 10/10/2013 21:20 | 0 | 264.4435656 | 264.4429728 | 264.434048 | 264.426664 | 264.4197664 |
| 10/10/2013 21:30 | 0 | 264.4441752 | 264.4429728 | 264.434048 | 264.427664 | 264.4197664 |
| 10/10/2013 21:40 | 0 | 264.44448   | 264.4439728 | 264.434048 | 264.425664 | 264.4207664 |
| 10/10/2013 21:50 | 0 | 264.4450896 | 264.4449728 | 264.437048 | 264.428664 | 264.4217664 |
| 10/10/2013 22:00 | 0 | 264.4456992 | 264.4469728 | 264.437048 | 264.429664 | 264.4217664 |
| 10/10/2013 22:10 | 0 | 264.4469184 | 264.4489728 | 264.440048 | 264.430664 | 264.4257664 |
| 10/10/2013 22:20 | 0 | 264.447528  | 264.4479728 | 264.441048 | 264.430664 | 264.4247664 |
| 10/10/2013 22:30 | 0 | 264.4481376 | 264.4499728 | 264.441048 | 264.428664 | 264.4287664 |
| 10/10/2013 22:40 | 0 | 264.4484424 | 264.4479728 | 264.443048 | 264.428664 | 264.4247664 |
| 10/10/2013 22:50 | 0 | 264.4484424 | 264.4479728 | 264.443048 | 264.430664 | 264.4267664 |
| 10/10/2013 23:00 | 0 | 264.4484424 | 264.4479728 | 264.443048 | 264.430664 | 264.4267664 |
| 10/10/2013 23:10 | 0 | 264.4481376 | 264.4449728 | 264.441048 | 264.427664 | 264.4257664 |
| 10/10/2013 23:20 | 0 | 264.4472232 | 264.4449728 | 264.444048 | 264.426664 | 264.4267664 |
| 10/10/2013 23:30 | 0 | 264.4463088 | 264.4409728 | 264.441048 | 264.426664 | 264.4247664 |
| 10/10/2013 23:40 | 0 | 264.4447848 | 264.4399728 | 264.439048 | 264.424664 | 264.4227664 |
| 10/10/2013 23:50 | 0 | 264.4438704 | 264.4389728 | 264.440048 | 264.423664 | 264.4237664 |
| 10/11/2013 0:00  | 0 | 264.4426512 | 264.4379728 | 264.440048 | 264.423664 | 264.4237664 |
| 10/11/2013 0:10  | 0 | 264.441432  | 264.4359728 | 264.437048 | 264.427664 | 264.4207664 |
| 10/11/2013 0:20  | 0 | 264.4386888 | 264.4279728 | 264.435048 | 264.425664 | 264.4187664 |
| 10/11/2013 0:30  | 0 | 264.4386888 | 264.4319728 | 264.435048 | 264.425664 | 264.4197664 |
| 10/11/2013 0:40  | 0 | 264.4347264 | 264.4209728 | 264.433048 | 264.426664 | 264.4187664 |
| 10/11/2013 0:50  | 0 | 264.4356408 | 264.4309728 | 264.433048 | 264.427664 | 264.4167664 |
| 10/11/2013 1:00  | 0 | 264.4328976 | 264.4219728 | 264.431048 | 264.424664 | 264.4157664 |
| 10/11/2013 1:10  | 0 | 264.4313736 | 264.4169728 | 264.428048 | 264.426664 | 264.4147664 |
| 10/11/2013 1:20  | 0 | 264.4304592 | 264.4249728 | 264.429048 | 264.426664 | 264.4147664 |
| 10/11/2013 1:30  | 0 | 264.4274112 | 264.4119728 | 264.425048 | 264.428664 | 264.4107664 |
| 10/11/2013 1:40  | 0 | 264.4268016 | 264.4089728 | 264.422048 | 264.423664 | 264.4097664 |
| 10/11/2013 1:50  | 0 | 264.4240584 | 264.4119728 | 264.420048 | 264.425664 | 264.4077664 |
| 10/11/2013 2:00  | 0 | 264.4219248 | 264.4019728 | 264.418048 | 264.425664 | 264.4077664 |
| 10/11/2013 2:10  | 0 | 264.4225344 | 264.4129728 | 264.417048 | 264.425664 | 264.4087664 |
| 10/11/2013 2:20  | 0 | 264.4182672 | 264.3999728 | 264.415048 | 264.423664 | 264.4037664 |
| 10/11/2013 2:30  | 0 | 264.4197912 | 264.4109728 | 264.415048 | 264.424664 | 264.4077664 |

|                  |   |             |             |            |            |             |
|------------------|---|-------------|-------------|------------|------------|-------------|
| 10/11/2013 2:40  | 0 | 264.4152192 | 264.3999728 | 264.411048 | 264.424664 | 264.4027664 |
| 10/11/2013 2:50  | 0 | 264.4146096 | 264.3999728 | 264.411048 | 264.424664 | 264.4017664 |
| 10/11/2013 3:00  | 0 | 264.4146096 | 264.4049728 | 264.408048 | 264.423664 | 264.4027664 |
| 10/11/2013 3:10  | 0 | 264.4112568 | 264.3959728 | 264.409048 | 264.426664 | 264.4007664 |
| 10/11/2013 3:20  | 0 | 264.4100376 | 264.3959728 | 264.407048 | 264.426664 | 264.4027664 |
| 10/11/2013 3:30  | 0 | 264.4085136 | 264.3969728 | 264.407048 | 264.427664 | 264.4007664 |
| 10/11/2013 3:40  | 0 | 264.4082088 | 264.3959728 | 264.404048 | 264.425664 | 264.4007664 |
| 10/11/2013 3:50  | 0 | 264.4072944 | 264.3909728 | 264.399048 | 264.421664 | 264.3967664 |
| 10/11/2013 4:00  | 0 | 264.407904  | 264.3959728 | 264.399048 | 264.422664 | 264.3957664 |
| 10/11/2013 4:10  | 0 | 264.4066848 | 264.3909728 | 264.399048 | 264.422664 | 264.3977664 |
| 10/11/2013 4:20  | 0 | 264.4057704 | 264.3879728 | 264.394048 | 264.421664 | 264.3947664 |
| 10/11/2013 4:30  | 0 | 264.4054656 | 264.3879728 | 264.394048 | 264.423664 | 264.3947664 |
| 10/11/2013 4:40  | 0 | 264.404856  | 264.3879728 | 264.395048 | 264.424664 | 264.3957664 |
| 10/11/2013 4:50  | 0 | 264.4045512 | 264.3879728 | 264.393048 | 264.423664 | 264.3947664 |
| 10/11/2013 5:00  | 0 | 264.4051608 | 264.3909728 | 264.393048 | 264.422664 | 264.3977664 |
| 10/11/2013 5:10  | 0 | 264.4057704 | 264.3929728 | 264.393048 | 264.422664 | 264.3957664 |
| 10/11/2013 5:20  | 0 | 264.404856  | 264.3919728 | 264.393048 | 264.424664 | 264.3957664 |
| 10/11/2013 5:30  | 0 | 264.404856  | 264.3919728 | 264.393048 | 264.424664 | 264.3937664 |
| 10/11/2013 5:40  | 0 | 264.404856  | 264.3909728 | 264.391048 | 264.419664 | 264.3947664 |
| 10/11/2013 5:50  | 0 | 264.4045512 | 264.3939728 | 264.389048 | 264.421664 | 264.3937664 |
| 10/11/2013 6:00  | 0 | 264.4042464 | 264.3879728 | 264.389048 | 264.421664 | 264.3927664 |
| 10/11/2013 6:10  | 0 | 264.4039416 | 264.3909728 | 264.389048 | 264.422664 | 264.3917664 |
| 10/11/2013 6:20  | 0 | 264.4039416 | 264.3919728 | 264.391048 | 264.422664 | 264.3937664 |
| 10/11/2013 6:30  | 0 | 264.4039416 | 264.3909728 | 264.389048 | 264.420664 | 264.3917664 |
| 10/11/2013 6:40  | 0 | 264.4042464 | 264.3919728 | 264.389048 | 264.418664 | 264.3937664 |
| 10/11/2013 6:50  | 0 | 264.4051608 | 264.3969728 | 264.391048 | 264.420664 | 264.3947664 |
| 10/11/2013 7:00  | 0 | 264.4069896 | 264.3999728 | 264.392048 | 264.420664 | 264.3957664 |
| 10/11/2013 7:10  | 0 | 264.4103424 | 264.4059728 | 264.389048 | 264.419664 | 264.3957664 |
| 10/11/2013 7:20  | 0 | 264.412476  | 264.4059728 | 264.394048 | 264.419664 | 264.3987664 |
| 10/11/2013 7:30  | 0 | 264.4143048 | 264.4099728 | 264.395048 | 264.419664 | 264.3997664 |
| 10/11/2013 7:40  | 0 | 264.417048  | 264.4119728 | 264.396048 | 264.419664 | 264.3997664 |
| 10/11/2013 7:50  | 0 | 264.4197912 | 264.4199728 | 264.399048 | 264.419664 | 264.4017664 |
| 10/11/2013 8:00  | 0 | 264.4228392 | 264.4249728 | 264.402048 | 264.420664 | 264.4037664 |
| 10/11/2013 8:10  | 0 | 264.4255824 | 264.4279728 | 264.407048 | 264.421664 | 264.4067664 |
| 10/11/2013 8:20  | 0 | 264.4286304 | 264.4249728 | 264.406048 | 264.418664 | 264.4057664 |
| 10/11/2013 8:30  | 0 | 264.4328976 | 264.4379728 | 264.413048 | 264.417664 | 264.4137664 |
| 10/11/2013 8:40  | 0 | 264.43686   | 264.4479728 | 264.417048 | 264.419664 | 264.4147664 |
| 10/11/2013 8:50  | 0 | 264.4386888 | 264.4439728 | 264.421048 | 264.419664 | 264.4147664 |
| 10/11/2013 9:00  | 0 | 264.442956  | 264.4469728 | 264.426048 | 264.418664 | 264.4177664 |
| 10/11/2013 9:10  | 0 | 264.4456992 | 264.4549728 | 264.430048 | 264.420664 | 264.4227664 |
| 10/11/2013 9:20  | 0 | 264.4469184 | 264.4549728 | 264.433048 | 264.418664 | 264.4207664 |
| 10/11/2013 9:30  | 0 | 264.4478328 | 264.4489728 | 264.434048 | 264.420664 | 264.4197664 |
| 10/11/2013 9:40  | 0 | 264.449052  | 264.4539728 | 264.437048 | 264.420664 | 264.4227664 |
| 10/11/2013 9:50  | 0 | 264.4499664 | 264.4549728 | 264.439048 | 264.421664 | 264.4257664 |
| 10/11/2013 10:00 | 0 | 264.4502712 | 264.4499728 | 264.440048 | 264.419664 | 264.4237664 |
| 10/11/2013 10:10 | 0 | 264.4511856 | 264.4559728 | 264.442048 | 264.420664 | 264.4267664 |
| 10/11/2013 10:20 | 0 | 264.4502712 | 264.4519728 | 264.444048 | 264.422664 | 264.4267664 |



|                  |   |             |             |            |            |             |
|------------------|---|-------------|-------------|------------|------------|-------------|
| 10/11/2013 10:30 | 0 | 264.4487472 | 264.4469728 | 264.443048 | 264.421664 | 264.4237664 |
| 10/11/2013 10:40 | 0 | 264.4496616 | 264.4529728 | 264.444048 | 264.422664 | 264.4267664 |
| 10/11/2013 10:50 | 0 | 264.4481376 | 264.4469728 | 264.446048 | 264.422664 | 264.4267664 |
| 10/11/2013 11:00 | 0 | 264.4493568 | 264.4479728 | 264.446048 | 264.422664 | 264.4267664 |
| 10/11/2013 11:10 | 0 | 264.4487472 | 264.4499728 | 264.444048 | 264.422664 | 264.4267664 |
| 10/11/2013 11:20 | 0 | 264.4481376 | 264.4449728 | 264.442048 | 264.418664 | 264.4257664 |
| 10/11/2013 11:30 | 0 | 264.447528  | 264.4469728 | 264.443048 | 264.422664 | 264.4257664 |
| 10/11/2013 11:40 | 0 | 264.4466136 | 264.4459728 | 264.443048 | 264.423664 | 264.4247664 |
| 10/11/2013 11:50 | 0 | 264.4456992 | 264.4449728 | 264.443048 | 264.420664 | 264.4217664 |
| 10/11/2013 12:00 | 0 | 264.4450896 | 264.4449728 | 264.443048 | 264.421664 | 264.4247664 |
| 10/11/2013 12:10 | 0 | 264.4438704 | 264.4409728 | 264.441048 | 264.420664 | 264.4217664 |
| 10/11/2013 12:20 | 0 | 264.4432608 | 264.4399728 | 264.441048 | 264.420664 | 264.4207664 |
| 10/11/2013 12:30 | 0 | 264.4423464 | 264.4399728 | 264.441048 | 264.419664 | 264.4217664 |
| 10/11/2013 12:40 | 0 | 264.4408224 | 264.4369728 | 264.441048 | 264.421664 | 264.4217664 |
| 10/11/2013 12:50 | 0 | 264.439908  | 264.4349728 | 264.439048 | 264.419664 | 264.4197664 |
| 10/11/2013 13:00 | 0 | 264.438384  | 264.4349728 | 264.438048 | 264.419664 | 264.4177664 |
| 10/11/2013 13:10 | 0 | 264.438384  | 264.4369728 | 264.437048 | 264.419664 | 264.4177664 |
| 10/11/2013 13:20 | 0 | 264.4380792 | 264.4339728 | 264.434048 | 264.419664 | 264.4167664 |
| 10/11/2013 13:30 | 0 | 264.4371648 | 264.4319728 | 264.435048 | 264.422664 | 264.4177664 |
| 10/11/2013 13:40 | 0 | 264.4362504 | 264.4309728 | 264.436048 | 264.423664 | 264.4187664 |
| 10/11/2013 13:50 | 0 | 264.4347264 | 264.4329728 | 264.434048 | 264.420664 | 264.4147664 |
| 10/11/2013 14:00 | 0 | 264.4359456 | 264.4309728 | 264.433048 | 264.417664 | 264.4157664 |
| 10/11/2013 14:10 | 0 | 264.4344216 | 264.4309728 | 264.431048 | 264.420664 | 264.4147664 |
| 10/11/2013 14:20 | 0 | 264.4341168 | 264.4309728 | 264.433048 | 264.419664 | 264.4167664 |
| 10/11/2013 14:30 | 0 | 264.433812  | 264.4329728 | 264.432048 | 264.419664 | 264.4147664 |
| 10/11/2013 14:40 | 0 | 264.4319832 | 264.4259728 | 264.430048 | 264.419664 | 264.4147664 |
| 10/11/2013 14:50 | 0 | 264.4328976 | 264.4289728 | 264.429048 | 264.419664 | 264.4147664 |
| 10/11/2013 15:00 | 0 | 264.4301544 | 264.4219728 | 264.430048 | 264.418664 | 264.4127664 |
| 10/11/2013 15:10 | 0 | 264.4310688 | 264.4299728 | 264.428048 | 264.418664 | 264.4137664 |
| 10/11/2013 15:20 | 0 | 264.4289352 | 264.4199728 | 264.428048 | 264.418664 | 264.4127664 |
| 10/11/2013 15:30 | 0 | 264.4298496 | 264.4279728 | 264.426048 | 264.419664 | 264.4147664 |
| 10/11/2013 15:40 | 0 | 264.4280208 | 264.4219728 | 264.426048 | 264.418664 | 264.4117664 |
| 10/11/2013 15:50 | 0 | 264.4289352 | 264.4269728 | 264.426048 | 264.420664 | 264.4127664 |
| 10/11/2013 16:00 | 0 | 264.4274112 | 264.4219728 | 264.424048 | 264.419664 | 264.4087664 |
| 10/11/2013 16:10 | 0 | 264.4274112 | 264.4189728 | 264.422048 | 264.417664 | 264.4097664 |
| 10/11/2013 16:20 | 0 | 264.4280208 | 264.4239728 | 264.422048 | 264.420664 | 264.4107664 |
| 10/11/2013 16:30 | 0 | 264.4274112 | 264.4269728 | 264.422048 | 264.420664 | 264.4127664 |
| 10/11/2013 16:40 | 0 | 264.427716  | 264.4249728 | 264.422048 | 264.419664 | 264.4107664 |
| 10/11/2013 16:50 | 0 | 264.4280208 | 264.4219728 | 264.424048 | 264.417664 | 264.4107664 |
| 10/11/2013 17:00 | 0 | 264.4280208 | 264.4269728 | 264.424048 | 264.419664 | 264.4127664 |
| 10/11/2013 17:10 | 0 | 264.4258872 | 264.4199728 | 264.421048 | 264.418664 | 264.4067664 |
| 10/11/2013 17:20 | 0 | 264.4264968 | 264.4209728 | 264.421048 | 264.418664 | 264.4087664 |
| 10/11/2013 17:30 | 0 | 264.4252776 | 264.4209728 | 264.419048 | 264.418664 | 264.4087664 |
| 10/11/2013 17:40 | 0 | 264.4249728 | 264.4179728 | 264.421048 | 264.420664 | 264.4087664 |
| 10/11/2013 17:50 | 0 | 264.4268016 | 264.4229728 | 264.418048 | 264.420664 | 264.4107664 |
| 10/11/2013 18:00 | 0 | 264.4268016 | 264.4249728 | 264.419048 | 264.420664 | 264.4087664 |
| 10/11/2013 18:10 | 0 | 264.427716  | 264.4249728 | 264.422048 | 264.423664 | 264.4117664 |

|                  |   |             |             |            |            |             |
|------------------|---|-------------|-------------|------------|------------|-------------|
| 10/11/2013 18:20 | 0 | 264.4286304 | 264.4269728 | 264.421048 | 264.422664 | 264.4107664 |
| 10/11/2013 18:30 | 0 | 264.4271064 | 264.4229728 | 264.421048 | 264.419664 | 264.4087664 |
| 10/11/2013 18:40 | 0 | 264.4286304 | 264.4269728 | 264.422048 | 264.417664 | 264.4107664 |
| 10/11/2013 18:50 | 0 | 264.4268016 | 264.4239728 | 264.421048 | 264.421664 | 264.4087664 |
| 10/11/2013 19:00 | 0 | 264.4280208 | 264.4269728 | 264.421048 | 264.421664 | 264.4107664 |
| 10/11/2013 19:10 | 0 | 264.4283256 | 264.4239728 | 264.421048 | 264.418664 | 264.4117664 |
| 10/11/2013 19:20 | 0 | 264.4268016 | 264.4239728 | 264.422048 | 264.419664 | 264.4107664 |
| 10/11/2013 19:30 | 0 | 264.4283256 | 264.4259728 | 264.422048 | 264.418664 | 264.4127664 |
| 10/11/2013 19:40 | 0 | 264.427716  | 264.4239728 | 264.420048 | 264.417664 | 264.4097664 |
| 10/11/2013 19:50 | 0 | 264.4289352 | 264.4259728 | 264.422048 | 264.418664 | 264.4117664 |
| 10/11/2013 20:00 | 0 | 264.4283256 | 264.4259728 | 264.420048 | 264.419664 | 264.4117664 |
| 10/11/2013 20:10 | 0 | 264.4286304 | 264.4229728 | 264.419048 | 264.417664 | 264.4107664 |
| 10/11/2013 20:20 | 0 | 264.4298496 | 264.4279728 | 264.420048 | 264.419664 | 264.4127664 |
| 10/11/2013 20:30 | 0 | 264.42924   | 264.4249728 | 264.420048 | 264.419664 | 264.4117664 |
| 10/11/2013 20:40 | 0 | 264.4295448 | 264.4229728 | 264.420048 | 264.417664 | 264.4117664 |
| 10/11/2013 20:50 | 0 | 264.4301544 | 264.4299728 | 264.419048 | 264.419664 | 264.4097664 |
| 10/11/2013 21:00 | 0 | 264.4301544 | 264.4259728 | 264.422048 | 264.419664 | 264.4117664 |
| 10/11/2013 21:10 | 0 | 264.4316784 | 264.4329728 | 264.422048 | 264.417664 | 264.4117664 |
| 10/11/2013 21:20 | 0 | 264.4313736 | 264.4309728 | 264.422048 | 264.420664 | 264.4117664 |
| 10/11/2013 21:30 | 0 | 264.4313736 | 264.4249728 | 264.423048 | 264.417664 | 264.4117664 |
| 10/11/2013 21:40 | 0 | 264.4328976 | 264.4309728 | 264.422048 | 264.419664 | 264.4157664 |
| 10/11/2013 21:50 | 0 | 264.4313736 | 264.4279728 | 264.423048 | 264.419664 | 264.4157664 |
| 10/11/2013 22:00 | 0 | 264.4310688 | 264.4259728 | 264.426048 | 264.420664 | 264.4147664 |
| 10/11/2013 22:10 | 0 | 264.432288  | 264.4329728 | 264.423048 | 264.419664 | 264.4157664 |
| 10/11/2013 22:20 | 0 | 264.4319832 | 264.4299728 | 264.424048 | 264.415664 | 264.4157664 |
| 10/11/2013 22:30 | 0 | 264.4325928 | 264.4269728 | 264.424048 | 264.417664 | 264.4157664 |
| 10/11/2013 22:40 | 0 | 264.432288  | 264.4309728 | 264.426048 | 264.419664 | 264.4157664 |
| 10/11/2013 22:50 | 0 | 264.4310688 | 264.4249728 | 264.424048 | 264.419664 | 264.4137664 |
| 10/11/2013 23:00 | 0 | 264.4319832 | 264.4269728 | 264.422048 | 264.417664 | 264.4127664 |
| 10/11/2013 23:10 | 0 | 264.4298496 | 264.4219728 | 264.422048 | 264.417664 | 264.4117664 |
| 10/11/2013 23:20 | 0 | 264.4295448 | 264.4219728 | 264.422048 | 264.418664 | 264.4107664 |
| 10/11/2013 23:30 | 0 | 264.42924   | 264.4249728 | 264.422048 | 264.418664 | 264.4127664 |
| 10/11/2013 23:40 | 0 | 264.4271064 | 264.4189728 | 264.420048 | 264.418664 | 264.4097664 |
| 10/11/2013 23:50 | 0 | 264.4264968 | 264.4189728 | 264.423048 | 264.420664 | 264.4097664 |
| 10/12/2013 0:00  | 0 | 264.426192  | 264.4249728 | 264.423048 | 264.418664 | 264.4117664 |
| 10/12/2013 0:10  | 0 | 264.424668  | 264.4179728 | 264.420048 | 264.415664 | 264.4077664 |
| 10/12/2013 0:20  | 0 | 264.4268016 | 264.4229728 | 264.421048 | 264.417664 | 264.4097664 |
| 10/12/2013 0:30  | 0 | 264.424668  | 264.4189728 | 264.421048 | 264.419664 | 264.4097664 |
| 10/12/2013 0:40  | 0 | 264.426192  | 264.4189728 | 264.418048 | 264.417664 | 264.4077664 |
| 10/12/2013 0:50  | 0 | 264.424668  | 264.4189728 | 264.417048 | 264.414664 | 264.4087664 |
| 10/12/2013 1:00  | 0 | 264.4234488 | 264.4129728 | 264.414048 | 264.415664 | 264.4067664 |
| 10/12/2013 1:10  | 0 | 264.42162   | 264.4109728 | 264.418048 | 264.417664 | 264.4057664 |
| 10/12/2013 1:20  | 0 | 264.4210104 | 264.4099728 | 264.414048 | 264.413664 | 264.4057664 |
| 10/12/2013 1:30  | 0 | 264.4207056 | 264.4129728 | 264.416048 | 264.414664 | 264.4067664 |
| 10/12/2013 1:40  | 0 | 264.4182672 | 264.4069728 | 264.411048 | 264.415664 | 264.4017664 |
| 10/12/2013 1:50  | 0 | 264.4176576 | 264.4089728 | 264.414048 | 264.416664 | 264.4037664 |
| 10/12/2013 2:00  | 0 | 264.417048  | 264.4059728 | 264.411048 | 264.414664 | 264.4027664 |

|                 |   |             |             |            |            |             |
|-----------------|---|-------------|-------------|------------|------------|-------------|
| 10/12/2013 2:10 | 0 | 264.4152192 | 264.4069728 | 264.413048 | 264.416664 | 264.4017664 |
| 10/12/2013 2:20 | 0 | 264.4143048 | 264.4019728 | 264.410048 | 264.415664 | 264.4017664 |
| 10/12/2013 2:30 | 0 | 264.4133904 | 264.4019728 | 264.408048 | 264.415664 | 264.3997664 |
| 10/12/2013 2:40 | 0 | 264.4118664 | 264.4019728 | 264.410048 | 264.415664 | 264.3997664 |
| 10/12/2013 2:50 | 0 | 264.4106472 | 264.3959728 | 264.404048 | 264.414664 | 264.3977664 |
| 10/12/2013 3:00 | 0 | 264.4097328 | 264.3989728 | 264.406048 | 264.415664 | 264.3967664 |
| 10/12/2013 3:10 | 0 | 264.4091232 | 264.3939728 | 264.403048 | 264.412664 | 264.3957664 |
| 10/12/2013 3:20 | 0 | 264.407904  | 264.3959728 | 264.403048 | 264.415664 | 264.3947664 |
| 10/12/2013 3:30 | 0 | 264.4072944 | 264.3959728 | 264.402048 | 264.415664 | 264.3957664 |
| 10/12/2013 3:40 | 0 | 264.4051608 | 264.3909728 | 264.400048 | 264.416664 | 264.3937664 |
| 10/12/2013 3:50 | 0 | 264.4042464 | 264.3899728 | 264.398048 | 264.415664 | 264.3927664 |
| 10/12/2013 4:00 | 0 | 264.403332  | 264.3899728 | 264.396048 | 264.415664 | 264.3927664 |
| 10/12/2013 4:10 | 0 | 264.403332  | 264.3939728 | 264.397048 | 264.417664 | 264.3937664 |
| 10/12/2013 4:20 | 0 | 264.4030272 | 264.3929728 | 264.395048 | 264.413664 | 264.3927664 |
| 10/12/2013 4:30 | 0 | 264.4027224 | 264.3909728 | 264.396048 | 264.415664 | 264.3927664 |
| 10/12/2013 4:40 | 0 | 264.4024176 | 264.3909728 | 264.396048 | 264.413664 | 264.3917664 |
| 10/12/2013 4:50 | 0 | 264.401808  | 264.3899728 | 264.394048 | 264.417664 | 264.3917664 |
| 10/12/2013 5:00 | 0 | 264.401808  | 264.3919728 | 264.394048 | 264.415664 | 264.3937664 |
| 10/12/2013 5:10 | 0 | 264.4015032 | 264.3929728 | 264.396048 | 264.419664 | 264.3937664 |
| 10/12/2013 5:20 | 0 | 264.4011984 | 264.3919728 | 264.393048 | 264.416664 | 264.3917664 |
| 10/12/2013 5:30 | 0 | 264.4008936 | 264.3899728 | 264.392048 | 264.415664 | 264.3897664 |
| 10/12/2013 5:40 | 0 | 264.4008936 | 264.3899728 | 264.390048 | 264.416664 | 264.3897664 |
| 10/12/2013 5:50 | 0 | 264.4005888 | 264.3899728 | 264.390048 | 264.414664 | 264.3907664 |
| 10/12/2013 6:00 | 0 | 264.4008936 | 264.3889728 | 264.389048 | 264.413664 | 264.3907664 |
| 10/12/2013 6:10 | 0 | 264.4008936 | 264.3899728 | 264.391048 | 264.414664 | 264.3907664 |
| 10/12/2013 6:20 | 0 | 264.4008936 | 264.3899728 | 264.389048 | 264.411664 | 264.3887664 |
| 10/12/2013 6:30 | 0 | 264.4008936 | 264.3919728 | 264.390048 | 264.415664 | 264.3907664 |
| 10/12/2013 6:40 | 0 | 264.4008936 | 264.3909728 | 264.390048 | 264.412664 | 264.3907664 |
| 10/12/2013 6:50 | 0 | 264.4008936 | 264.3909728 | 264.390048 | 264.412664 | 264.3897664 |
| 10/12/2013 7:00 | 0 | 264.4011984 | 264.3929728 | 264.388048 | 264.412664 | 264.3877664 |
| 10/12/2013 7:10 | 0 | 264.4015032 | 264.3909728 | 264.389048 | 264.413664 | 264.3897664 |
| 10/12/2013 7:20 | 0 | 264.4024176 | 264.3949728 | 264.389048 | 264.411664 | 264.3917664 |
| 10/12/2013 7:30 | 0 | 264.4030272 | 264.3969728 | 264.388048 | 264.413664 | 264.3907664 |
| 10/12/2013 7:40 | 0 | 264.4042464 | 264.3939728 | 264.388048 | 264.410664 | 264.3897664 |
| 10/12/2013 7:50 | 0 | 264.4054656 | 264.3959728 | 264.388048 | 264.410664 | 264.3907664 |
| 10/12/2013 8:00 | 0 | 264.4066848 | 264.3999728 | 264.391048 | 264.413664 | 264.3907664 |
| 10/12/2013 8:10 | 0 | 264.4075992 | 264.4029728 | 264.392048 | 264.413664 | 264.3927664 |
| 10/12/2013 8:20 | 0 | 264.4112568 | 264.4099728 | 264.395048 | 264.411664 | 264.3967664 |
| 10/12/2013 8:30 | 0 | 264.4121712 | 264.4079728 | 264.395048 | 264.413664 | 264.3967664 |
| 10/12/2013 8:40 | 0 | 264.412476  | 264.4079728 | 264.396048 | 264.413664 | 264.3967664 |
| 10/12/2013 8:50 | 0 | 264.4133904 | 264.4099728 | 264.397048 | 264.413664 | 264.3977664 |
| 10/12/2013 9:00 | 0 | 264.4149144 | 264.4109728 | 264.397048 | 264.410664 | 264.3967664 |
| 10/12/2013 9:10 | 0 | 264.4167432 | 264.4139728 | 264.398048 | 264.411664 | 264.3987664 |
| 10/12/2013 9:20 | 0 | 264.4182672 | 264.4139728 | 264.400048 | 264.409664 | 264.3997664 |
| 10/12/2013 9:30 | 0 | 264.420096  | 264.4189728 | 264.404048 | 264.411664 | 264.4027664 |
| 10/12/2013 9:40 | 0 | 264.4225344 | 264.4229728 | 264.407048 | 264.413664 | 264.4027664 |
| 10/12/2013 9:50 | 0 | 264.4249728 | 264.4279728 | 264.408048 | 264.411664 | 264.4047664 |

|                  |   |             |             |            |            |             |
|------------------|---|-------------|-------------|------------|------------|-------------|
| 10/12/2013 10:00 | 0 | 264.4271064 | 264.4289728 | 264.411048 | 264.410664 | 264.4077664 |
| 10/12/2013 10:10 | 0 | 264.4295448 | 264.4329728 | 264.410048 | 264.409664 | 264.4067664 |
| 10/12/2013 10:20 | 0 | 264.4319832 | 264.4369728 | 264.413048 | 264.407664 | 264.4087664 |
| 10/12/2013 10:30 | 0 | 264.4344216 | 264.4429728 | 264.420048 | 264.411664 | 264.4127664 |
| 10/12/2013 10:40 | 0 | 264.4365552 | 264.4429728 | 264.422048 | 264.409664 | 264.4127664 |
| 10/12/2013 10:50 | 0 | 264.4392984 | 264.4469728 | 264.425048 | 264.409664 | 264.4157664 |
| 10/12/2013 11:00 | 0 | 264.4417368 | 264.4479728 | 264.430048 | 264.409664 | 264.4177664 |
| 10/12/2013 11:10 | 0 | 264.4423464 | 264.4469728 | 264.432048 | 264.409664 | 264.4157664 |
| 10/12/2013 11:20 | 0 | 264.4441752 | 264.4499728 | 264.436048 | 264.411664 | 264.4197664 |
| 10/12/2013 11:30 | 0 | 264.4456992 | 264.4549728 | 264.439048 | 264.411664 | 264.4217664 |
| 10/12/2013 11:40 | 0 | 264.4466136 | 264.4549728 | 264.437048 | 264.411664 | 264.4197664 |
| 10/12/2013 11:50 | 0 | 264.4499664 | 264.4569728 | 264.441048 | 264.408664 | 264.4217664 |
| 10/12/2013 12:00 | 0 | 264.4514904 | 264.4599728 | 264.444048 | 264.412664 | 264.4237664 |
| 10/12/2013 12:10 | 0 | 264.4514904 | 264.4579728 | 264.446048 | 264.411664 | 264.4227664 |
| 10/12/2013 12:20 | 0 | 264.4502712 | 264.4539728 | 264.448048 | 264.410664 | 264.4217664 |
| 10/12/2013 12:30 | 0 | 264.4511856 | 264.4559728 | 264.446048 | 264.409664 | 264.4207664 |
| 10/12/2013 12:40 | 0 | 264.4517952 | 264.4569728 | 264.446048 | 264.411664 | 264.4207664 |
| 10/12/2013 12:50 | 0 | 264.4539288 | 264.4619728 | 264.450048 | 264.411664 | 264.4257664 |
| 10/12/2013 13:00 | 0 | 264.4545384 | 264.4589728 | 264.450048 | 264.411664 | 264.4257664 |
| 10/12/2013 13:10 | 0 | 264.4539288 | 264.4619728 | 264.452048 | 264.412664 | 264.4267664 |
| 10/12/2013 13:20 | 0 | 264.4517952 | 264.4519728 | 264.452048 | 264.411664 | 264.4237664 |
| 10/12/2013 13:30 | 0 | 264.4517952 | 264.4509728 | 264.450048 | 264.411664 | 264.4227664 |
| 10/12/2013 13:40 | 0 | 264.4511856 | 264.4519728 | 264.450048 | 264.411664 | 264.4227664 |
| 10/12/2013 13:50 | 0 | 264.4496616 | 264.4479728 | 264.449048 | 264.411664 | 264.4227664 |
| 10/12/2013 14:00 | 0 | 264.4487472 | 264.4499728 | 264.452048 | 264.415664 | 264.4257664 |
| 10/12/2013 14:10 | 0 | 264.4478328 | 264.4459728 | 264.449048 | 264.413664 | 264.4207664 |
| 10/12/2013 14:20 | 0 | 264.447528  | 264.4479728 | 264.449048 | 264.411664 | 264.4207664 |
| 10/12/2013 14:30 | 0 | 264.4469184 | 264.4459728 | 264.449048 | 264.413664 | 264.4207664 |
| 10/12/2013 14:40 | 0 | 264.446004  | 264.4429728 | 264.445048 | 264.410664 | 264.4177664 |
| 10/12/2013 14:50 | 0 | 264.4453944 | 264.4459728 | 264.448048 | 264.413664 | 264.4197664 |
| 10/12/2013 15:00 | 0 | 264.44448   | 264.4429728 | 264.446048 | 264.408664 | 264.4197664 |
| 10/12/2013 15:10 | 0 | 264.4435656 | 264.4419728 | 264.445048 | 264.408664 | 264.4177664 |
| 10/12/2013 15:20 | 0 | 264.4423464 | 264.4369728 | 264.444048 | 264.407664 | 264.4167664 |
| 10/12/2013 15:30 | 0 | 264.4417368 | 264.4389728 | 264.444048 | 264.412664 | 264.4147664 |
| 10/12/2013 15:40 | 0 | 264.4405176 | 264.4369728 | 264.442048 | 264.412664 | 264.4167664 |
| 10/12/2013 15:50 | 0 | 264.4396032 | 264.4349728 | 264.444048 | 264.414664 | 264.4167664 |
| 10/12/2013 16:00 | 0 | 264.438384  | 264.4339728 | 264.442048 | 264.414664 | 264.4167664 |
| 10/12/2013 16:10 | 0 | 264.43686   | 264.4299728 | 264.441048 | 264.414664 | 264.4127664 |
| 10/12/2013 16:20 | 0 | 264.4371648 | 264.4339728 | 264.440048 | 264.414664 | 264.4157664 |
| 10/12/2013 16:30 | 0 | 264.4365552 | 264.4339728 | 264.439048 | 264.414664 | 264.4137664 |
| 10/12/2013 16:40 | 0 | 264.4356408 | 264.4299728 | 264.440048 | 264.413664 | 264.4147664 |
| 10/12/2013 16:50 | 0 | 264.4350312 | 264.4329728 | 264.438048 | 264.413664 | 264.4147664 |
| 10/12/2013 17:00 | 0 | 264.433812  | 264.4279728 | 264.436048 | 264.412664 | 264.4107664 |
| 10/12/2013 17:10 | 0 | 264.4344216 | 264.4309728 | 264.437048 | 264.414664 | 264.4127664 |
| 10/12/2013 17:20 | 0 | 264.4332024 | 264.4309728 | 264.434048 | 264.414664 | 264.4107664 |
| 10/12/2013 17:30 | 0 | 264.4325928 | 264.4279728 | 264.434048 | 264.412664 | 264.4117664 |
| 10/12/2013 17:40 | 0 | 264.4328976 | 264.4319728 | 264.433048 | 264.412664 | 264.4117664 |

|                  |   |             |             |            |            |             |
|------------------|---|-------------|-------------|------------|------------|-------------|
| 10/12/2013 17:50 | 0 | 264.4316784 | 264.4249728 | 264.433048 | 264.410664 | 264.4097664 |
| 10/12/2013 18:00 | 0 | 264.4325928 | 264.4319728 | 264.433048 | 264.414664 | 264.4117664 |
| 10/12/2013 18:10 | 0 | 264.4313736 | 264.4269728 | 264.433048 | 264.413664 | 264.4117664 |
| 10/12/2013 18:20 | 0 | 264.432288  | 264.4289728 | 264.433048 | 264.413664 | 264.4117664 |
| 10/12/2013 18:30 | 0 | 264.4313736 | 264.4309728 | 264.431048 | 264.411664 | 264.4107664 |
| 10/12/2013 18:40 | 0 | 264.430764  | 264.4259728 | 264.427048 | 264.414664 | 264.4097664 |
| 10/12/2013 18:50 | 0 | 264.4325928 | 264.4359728 | 264.430048 | 264.413664 | 264.4127664 |
| 10/12/2013 19:00 | 0 | 264.4310688 | 264.4279728 | 264.430048 | 264.414664 | 264.4107664 |
| 10/12/2013 19:10 | 0 | 264.4319832 | 264.4299728 | 264.431048 | 264.416664 | 264.4127664 |
| 10/12/2013 19:20 | 0 | 264.4310688 | 264.4299728 | 264.428048 | 264.411664 | 264.4097664 |
| 10/12/2013 19:30 | 0 | 264.4304592 | 264.4239728 | 264.428048 | 264.412664 | 264.4087664 |
| 10/12/2013 19:40 | 0 | 264.4310688 | 264.4289728 | 264.430048 | 264.412664 | 264.4107664 |
| 10/12/2013 19:50 | 0 | 264.4313736 | 264.4289728 | 264.426048 | 264.413664 | 264.4097664 |
| 10/12/2013 20:00 | 0 | 264.4304592 | 264.4279728 | 264.427048 | 264.413664 | 264.4097664 |
| 10/12/2013 20:10 | 0 | 264.430764  | 264.4259728 | 264.427048 | 264.413664 | 264.4097664 |
| 10/12/2013 20:20 | 0 | 264.430764  | 264.4299728 | 264.427048 | 264.409664 | 264.4097664 |
| 10/12/2013 20:30 | 0 | 264.4304592 | 264.4249728 | 264.425048 | 264.413664 | 264.4097664 |
| 10/12/2013 20:40 | 0 | 264.4313736 | 264.4279728 | 264.424048 | 264.411664 | 264.4097664 |
| 10/12/2013 20:50 | 0 | 264.4304592 | 264.4269728 | 264.425048 | 264.411664 | 264.4097664 |
| 10/12/2013 21:00 | 0 | 264.4304592 | 264.4249728 | 264.427048 | 264.412664 | 264.4107664 |
| 10/12/2013 21:10 | 0 | 264.4310688 | 264.4309728 | 264.425048 | 264.413664 | 264.4107664 |
| 10/12/2013 21:20 | 0 | 264.4298496 | 264.4269728 | 264.428048 | 264.416664 | 264.4107664 |
| 10/12/2013 21:30 | 0 | 264.4304592 | 264.4249728 | 264.424048 | 264.412664 | 264.4107664 |
| 10/12/2013 21:40 | 0 | 264.4298496 | 264.4269728 | 264.424048 | 264.413664 | 264.4097664 |
| 10/12/2013 21:50 | 0 | 264.4295448 | 264.4239728 | 264.422048 | 264.411664 | 264.4077664 |
| 10/12/2013 22:00 | 0 | 264.42924   | 264.4219728 | 264.424048 | 264.411664 | 264.4097664 |
| 10/12/2013 22:10 | 0 | 264.4298496 | 264.4269728 | 264.424048 | 264.412664 | 264.4077664 |
| 10/12/2013 22:20 | 0 | 264.4280208 | 264.4179728 | 264.421048 | 264.412664 | 264.4067664 |
| 10/12/2013 22:30 | 0 | 264.42924   | 264.4219728 | 264.422048 | 264.413664 | 264.4087664 |
| 10/12/2013 22:40 | 0 | 264.4286304 | 264.4249728 | 264.423048 | 264.413664 | 264.4087664 |
| 10/12/2013 22:50 | 0 | 264.427716  | 264.4219728 | 264.422048 | 264.413664 | 264.4087664 |
| 10/12/2013 23:00 | 0 | 264.4286304 | 264.4219728 | 264.422048 | 264.411664 | 264.4097664 |
| 10/12/2013 23:10 | 0 | 264.427716  | 264.4249728 | 264.421048 | 264.413664 | 264.4097664 |
| 10/12/2013 23:20 | 0 | 264.4258872 | 264.4189728 | 264.422048 | 264.412664 | 264.4067664 |
| 10/12/2013 23:30 | 0 | 264.4271064 | 264.4189728 | 264.420048 | 264.411664 | 264.4067664 |
| 10/12/2013 23:40 | 0 | 264.4255824 | 264.4189728 | 264.420048 | 264.413664 | 264.4057664 |
| 10/12/2013 23:50 | 0 | 264.4255824 | 264.4159728 | 264.419048 | 264.411664 | 264.4057664 |
| 10/13/2013 0:00  | 0 | 264.4255824 | 264.4219728 | 264.418048 | 264.414664 | 264.4057664 |
| 10/13/2013 0:10  | 0 | 264.424668  | 264.4199728 | 264.419048 | 264.412664 | 264.4077664 |
| 10/13/2013 0:20  | 0 | 264.4237536 | 264.4149728 | 264.417048 | 264.411664 | 264.4047664 |
| 10/13/2013 0:30  | 0 | 264.4222296 | 264.4119728 | 264.416048 | 264.412664 | 264.4047664 |
| 10/13/2013 0:40  | 0 | 264.4222296 | 264.4119728 | 264.417048 | 264.412664 | 264.4027664 |
| 10/13/2013 0:50  | 0 | 264.4219248 | 264.4139728 | 264.416048 | 264.413664 | 264.4017664 |
| 10/13/2013 1:00  | 0 | 264.420096  | 264.4099728 | 264.413048 | 264.412664 | 264.4007664 |
| 10/13/2013 1:10  | 0 | 264.4179624 | 264.4019728 | 264.413048 | 264.411664 | 264.3977664 |
| 10/13/2013 1:20  | 0 | 264.418572  | 264.4089728 | 264.413048 | 264.413664 | 264.4007664 |
| 10/13/2013 1:30  | 0 | 264.4176576 | 264.4099728 | 264.410048 | 264.411664 | 264.3997664 |

|                 |   |             |             |            |            |             |
|-----------------|---|-------------|-------------|------------|------------|-------------|
| 10/13/2013 1:40 | 0 | 264.4146096 | 264.4019728 | 264.413048 | 264.413664 | 264.3977664 |
| 10/13/2013 1:50 | 0 | 264.4146096 | 264.4009728 | 264.413048 | 264.413664 | 264.3997664 |
| 10/13/2013 2:00 | 0 | 264.4149144 | 264.4079728 | 264.410048 | 264.414664 | 264.3987664 |
| 10/13/2013 2:10 | 0 | 264.4115616 | 264.3989728 | 264.410048 | 264.412664 | 264.3967664 |
| 10/13/2013 2:20 | 0 | 264.4112568 | 264.3999728 | 264.406048 | 264.411664 | 264.3957664 |
| 10/13/2013 2:30 | 0 | 264.4100376 | 264.3929728 | 264.406048 | 264.413664 | 264.3937664 |
| 10/13/2013 2:40 | 0 | 264.4088184 | 264.3969728 | 264.404048 | 264.411664 | 264.3927664 |
| 10/13/2013 2:50 | 0 | 264.4082088 | 264.3949728 | 264.404048 | 264.411664 | 264.3947664 |
| 10/13/2013 3:00 | 0 | 264.4091232 | 264.4019728 | 264.403048 | 264.411664 | 264.3947664 |
| 10/13/2013 3:10 | 0 | 264.4057704 | 264.3889728 | 264.402048 | 264.413664 | 264.3927664 |
| 10/13/2013 3:20 | 0 | 264.4042464 | 264.3909728 | 264.401048 | 264.410664 | 264.3917664 |
| 10/13/2013 3:30 | 0 | 264.4039416 | 264.3909728 | 264.400048 | 264.410664 | 264.3897664 |
| 10/13/2013 3:40 | 0 | 264.4036368 | 264.3929728 | 264.399048 | 264.412664 | 264.3907664 |
| 10/13/2013 3:50 | 0 | 264.4030272 | 264.3919728 | 264.401048 | 264.413664 | 264.3947664 |
| 10/13/2013 4:00 | 0 | 264.4021128 | 264.3909728 | 264.398048 | 264.412664 | 264.3897664 |
| 10/13/2013 4:10 | 0 | 264.4011984 | 264.3879728 | 264.395048 | 264.410664 | 264.3867664 |
| 10/13/2013 4:20 | 0 | 264.4008936 | 264.3879728 | 264.397048 | 264.412664 | 264.3897664 |
| 10/13/2013 4:30 | 0 | 264.400284  | 264.3879728 | 264.394048 | 264.410664 | 264.3887664 |
| 10/13/2013 4:40 | 0 | 264.3999792 | 264.3859728 | 264.395048 | 264.412664 | 264.3887664 |
| 10/13/2013 4:50 | 0 | 264.3996744 | 264.3859728 | 264.395048 | 264.411664 | 264.3887664 |
| 10/13/2013 5:00 | 0 | 264.3993696 | 264.3879728 | 264.392048 | 264.409664 | 264.3877664 |
| 10/13/2013 5:10 | 0 | 264.3984552 | 264.3839728 | 264.391048 | 264.410664 | 264.3867664 |
| 10/13/2013 5:20 | 0 | 264.3981504 | 264.3829728 | 264.388048 | 264.409664 | 264.3857664 |
| 10/13/2013 5:30 | 0 | 264.3978456 | 264.3839728 | 264.391048 | 264.409664 | 264.3857664 |
| 10/13/2013 5:40 | 0 | 264.3975408 | 264.3829728 | 264.391048 | 264.409664 | 264.3867664 |
| 10/13/2013 5:50 | 0 | 264.3969312 | 264.3839728 | 264.390048 | 264.411664 | 264.3867664 |
| 10/13/2013 6:00 | 0 | 264.3966264 | 264.3829728 | 264.388048 | 264.410664 | 264.3857664 |
| 10/13/2013 6:10 | 0 | 264.3960168 | 264.3819728 | 264.388048 | 264.408664 | 264.3847664 |
| 10/13/2013 6:20 | 0 | 264.3960168 | 264.3829728 | 264.387048 | 264.408664 | 264.3847664 |
| 10/13/2013 6:30 | 0 | 264.395712  | 264.3829728 | 264.387048 | 264.410664 | 264.3827664 |
| 10/13/2013 6:40 | 0 | 264.395712  | 264.3849728 | 264.388048 | 264.410664 | 264.3857664 |
| 10/13/2013 6:50 | 0 | 264.3954072 | 264.3819728 | 264.385048 | 264.407664 | 264.3847664 |
| 10/13/2013 7:00 | 0 | 264.3954072 | 264.3849728 | 264.387048 | 264.408664 | 264.3847664 |
| 10/13/2013 7:10 | 0 | 264.3954072 | 264.3809728 | 264.385048 | 264.407664 | 264.3837664 |
| 10/13/2013 7:20 | 0 | 264.3951024 | 264.3819728 | 264.384048 | 264.408664 | 264.3837664 |
| 10/13/2013 7:30 | 0 | 264.3954072 | 264.3829728 | 264.382048 | 264.406664 | 264.3827664 |
| 10/13/2013 7:40 | 0 | 264.3954072 | 264.3839728 | 264.385048 | 264.406664 | 264.3837664 |
| 10/13/2013 7:50 | 0 | 264.3966264 | 264.3889728 | 264.388048 | 264.410664 | 264.3877664 |
| 10/13/2013 8:00 | 0 | 264.3975408 | 264.3919728 | 264.385048 | 264.409664 | 264.3867664 |
| 10/13/2013 8:10 | 0 | 264.3978456 | 264.3869728 | 264.383048 | 264.407664 | 264.3837664 |
| 10/13/2013 8:20 | 0 | 264.3984552 | 264.3889728 | 264.385048 | 264.405664 | 264.3847664 |
| 10/13/2013 8:30 | 0 | 264.3993696 | 264.3919728 | 264.386048 | 264.410664 | 264.3857664 |
| 10/13/2013 8:40 | 0 | 264.400284  | 264.3929728 | 264.386048 | 264.408664 | 264.3867664 |
| 10/13/2013 8:50 | 0 | 264.401808  | 264.3959728 | 264.387048 | 264.408664 | 264.3867664 |
| 10/13/2013 9:00 | 0 | 264.4057704 | 264.4019728 | 264.389048 | 264.407664 | 264.3887664 |
| 10/13/2013 9:10 | 0 | 264.4085136 | 264.4039728 | 264.390048 | 264.406664 | 264.3907664 |
| 10/13/2013 9:20 | 0 | 264.4088184 | 264.4039728 | 264.391048 | 264.404664 | 264.3897664 |

|                  |   |             |             |            |            |             |
|------------------|---|-------------|-------------|------------|------------|-------------|
| 10/13/2013 9:30  | 0 | 264.410952  | 264.4059728 | 264.392048 | 264.405664 | 264.3897664 |
| 10/13/2013 9:40  | 0 | 264.4136952 | 264.4119728 | 264.394048 | 264.405664 | 264.3937664 |
| 10/13/2013 9:50  | 0 | 264.4158288 | 264.4159728 | 264.396048 | 264.405664 | 264.3957664 |
| 10/13/2013 10:00 | 0 | 264.4182672 | 264.4189728 | 264.399048 | 264.405664 | 264.3977664 |
| 10/13/2013 10:10 | 0 | 264.4204008 | 264.4209728 | 264.405048 | 264.408664 | 264.4007664 |
| 10/13/2013 10:20 | 0 | 264.4228392 | 264.4239728 | 264.406048 | 264.404664 | 264.3987664 |
| 10/13/2013 10:30 | 0 | 264.4252776 | 264.4269728 | 264.408048 | 264.405664 | 264.4027664 |
| 10/13/2013 10:40 | 0 | 264.4280208 | 264.4319728 | 264.413048 | 264.405664 | 264.4037664 |
| 10/13/2013 10:50 | 0 | 264.4304592 | 264.4349728 | 264.414048 | 264.405664 | 264.4057664 |
| 10/13/2013 11:00 | 0 | 264.4325928 | 264.4389728 | 264.417048 | 264.407664 | 264.4077664 |
| 10/13/2013 11:10 | 0 | 264.433812  | 264.4369728 | 264.419048 | 264.405664 | 264.4087664 |
| 10/13/2013 11:20 | 0 | 264.435336  | 264.4369728 | 264.422048 | 264.403664 | 264.4077664 |
| 10/13/2013 11:30 | 0 | 264.4392984 | 264.4499728 | 264.426048 | 264.405664 | 264.4137664 |
| 10/13/2013 11:40 | 0 | 264.4420416 | 264.4509728 | 264.432048 | 264.404664 | 264.4167664 |
| 10/13/2013 11:50 | 0 | 264.4435656 | 264.4499728 | 264.433048 | 264.406664 | 264.4167664 |
| 10/13/2013 12:00 | 0 | 264.44448   | 264.4479728 | 264.438048 | 264.407664 | 264.4177664 |
| 10/13/2013 12:10 | 0 | 264.4447848 | 264.4529728 | 264.437048 | 264.405664 | 264.4177664 |
| 10/13/2013 12:20 | 0 | 264.4453944 | 264.4489728 | 264.440048 | 264.408664 | 264.4177664 |
| 10/13/2013 12:30 | 0 | 264.4463088 | 264.4519728 | 264.443048 | 264.408664 | 264.4187664 |
| 10/13/2013 12:40 | 0 | 264.447528  | 264.4549728 | 264.443048 | 264.406664 | 264.4187664 |
| 10/13/2013 12:50 | 0 | 264.447528  | 264.4489728 | 264.443048 | 264.408664 | 264.4187664 |
| 10/13/2013 13:00 | 0 | 264.4484424 | 264.4529728 | 264.444048 | 264.410664 | 264.4217664 |
| 10/13/2013 13:10 | 0 | 264.449052  | 264.4559728 | 264.447048 | 264.409664 | 264.4227664 |
| 10/13/2013 13:20 | 0 | 264.4478328 | 264.4489728 | 264.447048 | 264.411664 | 264.4207664 |
| 10/13/2013 13:30 | 0 | 264.4481376 | 264.4489728 | 264.448048 | 264.409664 | 264.4217664 |
| 10/13/2013 13:40 | 0 | 264.4478328 | 264.4499728 | 264.447048 | 264.408664 | 264.4217664 |
| 10/13/2013 13:50 | 0 | 264.446004  | 264.4429728 | 264.446048 | 264.410664 | 264.4177664 |
| 10/13/2013 14:00 | 0 | 264.4466136 | 264.4479728 | 264.447048 | 264.410664 | 264.4217664 |
| 10/13/2013 14:10 | 0 | 264.4463088 | 264.4439728 | 264.443048 | 264.409664 | 264.4187664 |
| 10/13/2013 14:20 | 0 | 264.44448   | 264.4399728 | 264.444048 | 264.408664 | 264.4157664 |
| 10/13/2013 14:30 | 0 | 264.4450896 | 264.4449728 | 264.444048 | 264.408664 | 264.4177664 |
| 10/13/2013 14:40 | 0 | 264.44448   | 264.4429728 | 264.443048 | 264.410664 | 264.4157664 |
| 10/13/2013 14:50 | 0 | 264.4438704 | 264.4419728 | 264.444048 | 264.410664 | 264.4197664 |
| 10/13/2013 15:00 | 0 | 264.442956  | 264.4379728 | 264.443048 | 264.406664 | 264.4177664 |
| 10/13/2013 15:10 | 0 | 264.4417368 | 264.4359728 | 264.443048 | 264.408664 | 264.4177664 |
| 10/13/2013 15:20 | 0 | 264.4420416 | 264.4409728 | 264.443048 | 264.409664 | 264.4187664 |
| 10/13/2013 15:30 | 0 | 264.4417368 | 264.4409728 | 264.443048 | 264.410664 | 264.4187664 |
| 10/13/2013 15:40 | 0 | 264.4408224 | 264.4379728 | 264.440048 | 264.409664 | 264.4167664 |
| 10/13/2013 15:50 | 0 | 264.439908  | 264.4369728 | 264.441048 | 264.410664 | 264.4167664 |
| 10/13/2013 16:00 | 0 | 264.4389936 | 264.4339728 | 264.441048 | 264.410664 | 264.4167664 |
| 10/13/2013 16:10 | 0 | 264.4377744 | 264.4319728 | 264.441048 | 264.408664 | 264.4147664 |
| 10/13/2013 16:20 | 0 | 264.43686   | 264.4319728 | 264.437048 | 264.412664 | 264.4127664 |
| 10/13/2013 16:30 | 0 | 264.4359456 | 264.4299728 | 264.437048 | 264.409664 | 264.4127664 |
| 10/13/2013 16:40 | 0 | 264.4347264 | 264.4289728 | 264.437048 | 264.408664 | 264.4107664 |
| 10/13/2013 16:50 | 0 | 264.4347264 | 264.4309728 | 264.437048 | 264.409664 | 264.4117664 |
| 10/13/2013 17:00 | 0 | 264.4347264 | 264.4329728 | 264.437048 | 264.409664 | 264.4117664 |
| 10/13/2013 17:10 | 0 | 264.4341168 | 264.4299728 | 264.437048 | 264.409664 | 264.4117664 |

|                  |   |             |             |            |            |             |
|------------------|---|-------------|-------------|------------|------------|-------------|
| 10/13/2013 17:20 | 0 | 264.4344216 | 264.4329728 | 264.437048 | 264.410664 | 264.4137664 |
| 10/13/2013 17:30 | 0 | 264.4344216 | 264.4329728 | 264.435048 | 264.412664 | 264.4137664 |
| 10/13/2013 17:40 | 0 | 264.4335072 | 264.4329728 | 264.437048 | 264.413664 | 264.4127664 |
| 10/13/2013 17:50 | 0 | 264.433812  | 264.4319728 | 264.436048 | 264.411664 | 264.4127664 |
| 10/13/2013 18:00 | 0 | 264.432288  | 264.4259728 | 264.434048 | 264.411664 | 264.4097664 |
| 10/13/2013 18:10 | 0 | 264.4332024 | 264.4309728 | 264.431048 | 264.410664 | 264.4117664 |
| 10/13/2013 18:20 | 0 | 264.4328976 | 264.4279728 | 264.432048 | 264.412664 | 264.4087664 |
| 10/13/2013 18:30 | 0 | 264.4319832 | 264.4279728 | 264.433048 | 264.412664 | 264.4107664 |
| 10/13/2013 18:40 | 0 | 264.4319832 | 264.4269728 | 264.432048 | 264.411664 | 264.4127664 |
| 10/13/2013 18:50 | 0 | 264.4313736 | 264.4259728 | 264.430048 | 264.408664 | 264.4077664 |
| 10/13/2013 19:00 | 0 | 264.4328976 | 264.4299728 | 264.429048 | 264.411664 | 264.4097664 |
| 10/13/2013 19:10 | 0 | 264.432288  | 264.4279728 | 264.429048 | 264.410664 | 264.4077664 |
| 10/13/2013 19:20 | 0 | 264.4325928 | 264.4279728 | 264.430048 | 264.410664 | 264.4097664 |
| 10/13/2013 19:30 | 0 | 264.4335072 | 264.4339728 | 264.429048 | 264.410664 | 264.4097664 |
| 10/13/2013 19:40 | 0 | 264.4350312 | 264.4329728 | 264.427048 | 264.410664 | 264.4097664 |
| 10/13/2013 19:50 | 0 | 264.4347264 | 264.4309728 | 264.430048 | 264.408664 | 264.4097664 |
| 10/13/2013 20:00 | 0 | 264.4356408 | 264.4359728 | 264.430048 | 264.412664 | 264.4127664 |
| 10/13/2013 20:10 | 0 | 264.4347264 | 264.4329728 | 264.430048 | 264.410664 | 264.4117664 |
| 10/13/2013 20:20 | 0 | 264.43686   | 264.4359728 | 264.430048 | 264.412664 | 264.4147664 |
| 10/13/2013 20:30 | 0 | 264.4377744 | 264.4349728 | 264.430048 | 264.411664 | 264.4157664 |
| 10/13/2013 20:40 | 0 | 264.438384  | 264.4359728 | 264.431048 | 264.409664 | 264.4157664 |
| 10/13/2013 20:50 | 0 | 264.4396032 | 264.4369728 | 264.431048 | 264.410664 | 264.4137664 |
| 10/13/2013 21:00 | 0 | 264.4408224 | 264.4379728 | 264.428048 | 264.410664 | 264.4157664 |
| 10/13/2013 21:10 | 0 | 264.4417368 | 264.4409728 | 264.432048 | 264.411664 | 264.4197664 |
| 10/13/2013 21:20 | 0 | 264.4423464 | 264.4409728 | 264.432048 | 264.411664 | 264.4197664 |
| 10/13/2013 21:30 | 0 | 264.4435656 | 264.4429728 | 264.434048 | 264.412664 | 264.4177664 |
| 10/13/2013 21:40 | 0 | 264.4441752 | 264.4429728 | 264.435048 | 264.410664 | 264.4197664 |
| 10/13/2013 21:50 | 0 | 264.44448   | 264.4429728 | 264.438048 | 264.412664 | 264.4217664 |
| 10/13/2013 22:00 | 0 | 264.4447848 | 264.4409728 | 264.437048 | 264.411664 | 264.4227664 |
| 10/13/2013 22:10 | 0 | 264.4447848 | 264.4409728 | 264.438048 | 264.411664 | 264.4227664 |
| 10/13/2013 22:20 | 0 | 264.4450896 | 264.4409728 | 264.439048 | 264.413664 | 264.4227664 |
| 10/13/2013 22:30 | 0 | 264.4447848 | 264.4409728 | 264.437048 | 264.411664 | 264.4197664 |
| 10/13/2013 22:40 | 0 | 264.4447848 | 264.4399728 | 264.438048 | 264.411664 | 264.4197664 |
| 10/13/2013 22:50 | 0 | 264.4447848 | 264.4379728 | 264.437048 | 264.411664 | 264.4207664 |
| 10/13/2013 23:00 | 0 | 264.44448   | 264.4409728 | 264.439048 | 264.413664 | 264.4227664 |
| 10/13/2013 23:10 | 0 | 264.4438704 | 264.4399728 | 264.439048 | 264.411664 | 264.4207664 |
| 10/13/2013 23:20 | 0 | 264.442956  | 264.4389728 | 264.439048 | 264.414664 | 264.4207664 |
| 10/13/2013 23:30 | 0 | 264.4420416 | 264.4339728 | 264.437048 | 264.412664 | 264.4207664 |
| 10/13/2013 23:40 | 0 | 264.4405176 | 264.4339728 | 264.437048 | 264.414664 | 264.4197664 |
| 10/13/2013 23:50 | 0 | 264.438384  | 264.4279728 | 264.437048 | 264.413664 | 264.4167664 |
| 10/14/2013 0:00  | 0 | 264.43686   | 264.4239728 | 264.434048 | 264.410664 | 264.4147664 |
| 10/14/2013 0:10  | 0 | 264.433812  | 264.4229728 | 264.433048 | 264.412664 | 264.4147664 |
| 10/14/2013 0:20  | 0 | 264.4335072 | 264.4239728 | 264.433048 | 264.411664 | 264.4157664 |
| 10/14/2013 0:30  | 0 | 264.4310688 | 264.4219728 | 264.431048 | 264.413664 | 264.4127664 |
| 10/14/2013 0:40  | 0 | 264.4298496 | 264.4139728 | 264.430048 | 264.414664 | 264.4127664 |
| 10/14/2013 0:50  | 0 | 264.4274112 | 264.4159728 | 264.427048 | 264.412664 | 264.4077664 |
| 10/14/2013 1:00  | 0 | 264.4255824 | 264.4059728 | 264.426048 | 264.410664 | 264.4077664 |



|                 |   |             |             |            |            |             |
|-----------------|---|-------------|-------------|------------|------------|-------------|
| 10/14/2013 1:10 | 0 | 264.4249728 | 264.4139728 | 264.425048 | 264.411664 | 264.4097664 |
| 10/14/2013 1:20 | 0 | 264.4207056 | 264.3989728 | 264.423048 | 264.413664 | 264.4037664 |
| 10/14/2013 1:30 | 0 | 264.4219248 | 264.4109728 | 264.421048 | 264.411664 | 264.4077664 |
| 10/14/2013 1:40 | 0 | 264.417048  | 264.3969728 | 264.421048 | 264.414664 | 264.4037664 |
| 10/14/2013 1:50 | 0 | 264.4179624 | 264.4019728 | 264.417048 | 264.411664 | 264.4037664 |
| 10/14/2013 2:00 | 0 | 264.415524  | 264.4019728 | 264.415048 | 264.414664 | 264.4037664 |
| 10/14/2013 2:10 | 0 | 264.4118664 | 264.3939728 | 264.413048 | 264.414664 | 264.3997664 |
| 10/14/2013 2:20 | 0 | 264.412476  | 264.3989728 | 264.413048 | 264.414664 | 264.4017664 |
| 10/14/2013 2:30 | 0 | 264.4097328 | 264.3939728 | 264.409048 | 264.411664 | 264.3987664 |
| 10/14/2013 2:40 | 0 | 264.4075992 | 264.3859728 | 264.406048 | 264.411664 | 264.3947664 |
| 10/14/2013 2:50 | 0 | 264.4069896 | 264.3939728 | 264.406048 | 264.414664 | 264.3967664 |
| 10/14/2013 3:00 | 0 | 264.404856  | 264.3889728 | 264.403048 | 264.414664 | 264.3927664 |
| 10/14/2013 3:10 | 0 | 264.4051608 | 264.3909728 | 264.403048 | 264.412664 | 264.3947664 |
| 10/14/2013 3:20 | 0 | 264.403332  | 264.3899728 | 264.403048 | 264.415664 | 264.3947664 |
| 10/14/2013 3:30 | 0 | 264.4027224 | 264.3869728 | 264.399048 | 264.413664 | 264.3947664 |
| 10/14/2013 3:40 | 0 | 264.4011984 | 264.3869728 | 264.399048 | 264.409664 | 264.3907664 |
| 10/14/2013 3:50 | 0 | 264.4011984 | 264.3909728 | 264.398048 | 264.412664 | 264.3917664 |
| 10/14/2013 4:00 | 0 | 264.3996744 | 264.3849728 | 264.397048 | 264.411664 | 264.3887664 |
| 10/14/2013 4:10 | 0 | 264.3984552 | 264.3859728 | 264.398048 | 264.412664 | 264.3897664 |
| 10/14/2013 4:20 | 0 | 264.3978456 | 264.3849728 | 264.394048 | 264.409664 | 264.3867664 |
| 10/14/2013 4:30 | 0 | 264.3975408 | 264.3849728 | 264.391048 | 264.411664 | 264.3887664 |
| 10/14/2013 4:40 | 0 | 264.3969312 | 264.3849728 | 264.393048 | 264.411664 | 264.3887664 |
| 10/14/2013 4:50 | 0 | 264.3966264 | 264.3849728 | 264.389048 | 264.410664 | 264.3867664 |
| 10/14/2013 5:00 | 0 | 264.3960168 | 264.3829728 | 264.389048 | 264.407664 | 264.3847664 |
| 10/14/2013 5:10 | 0 | 264.3960168 | 264.3859728 | 264.389048 | 264.408664 | 264.3857664 |
| 10/14/2013 5:20 | 0 | 264.3966264 | 264.3859728 | 264.389048 | 264.408664 | 264.3857664 |
| 10/14/2013 5:30 | 0 | 264.395712  | 264.3839728 | 264.386048 | 264.406664 | 264.3847664 |
| 10/14/2013 5:40 | 0 | 264.3966264 | 264.3869728 | 264.386048 | 264.407664 | 264.3867664 |
| 10/14/2013 5:50 | 0 | 264.395712  | 264.3869728 | 264.386048 | 264.409664 | 264.3857664 |
| 10/14/2013 6:00 | 0 | 264.3951024 | 264.3839728 | 264.386048 | 264.407664 | 264.3837664 |
| 10/14/2013 6:10 | 0 | 264.3951024 | 264.3819728 | 264.386048 | 264.407664 | 264.3847664 |
| 10/14/2013 6:20 | 0 | 264.3951024 | 264.3849728 | 264.386048 | 264.407664 | 264.3837664 |
| 10/14/2013 6:30 | 0 | 264.395712  | 264.3859728 | 264.385048 | 264.408664 | 264.3847664 |
| 10/14/2013 6:40 | 0 | 264.397236  | 264.3859728 | 264.385048 | 264.405664 | 264.3847664 |
| 10/14/2013 6:50 | 0 | 264.3975408 | 264.3869728 | 264.386048 | 264.407664 | 264.3837664 |
| 10/14/2013 7:00 | 0 | 264.3981504 | 264.3899728 | 264.385048 | 264.405664 | 264.3847664 |
| 10/14/2013 7:10 | 0 | 264.3999792 | 264.3899728 | 264.384048 | 264.404664 | 264.3837664 |
| 10/14/2013 7:20 | 0 | 264.4024176 | 264.4029728 | 264.386048 | 264.406664 | 264.3897664 |
| 10/14/2013 7:30 | 0 | 264.4060752 | 264.4039728 | 264.388048 | 264.405664 | 264.3897664 |
| 10/14/2013 7:40 | 0 | 264.4066848 | 264.4019728 | 264.391048 | 264.404664 | 264.3897664 |
| 10/14/2013 7:50 | 0 | 264.4091232 | 264.4019728 | 264.391048 | 264.404664 | 264.3897664 |
| 10/14/2013 8:00 | 0 | 264.4133904 | 264.4169728 | 264.397048 | 264.405664 | 264.3977664 |
| 10/14/2013 8:10 | 0 | 264.417048  | 264.4229728 | 264.399048 | 264.407664 | 264.3987664 |
| 10/14/2013 8:20 | 0 | 264.4204008 | 264.4199728 | 264.399048 | 264.402664 | 264.3977664 |
| 10/14/2013 8:30 | 0 | 264.4243632 | 264.4299728 | 264.405048 | 264.404664 | 264.4027664 |
| 10/14/2013 8:40 | 0 | 264.4264968 | 264.4289728 | 264.407048 | 264.402664 | 264.4027664 |
| 10/14/2013 8:50 | 0 | 264.4289352 | 264.4359728 | 264.411048 | 264.403664 | 264.4057664 |

|                  |   |             |             |            |            |             |
|------------------|---|-------------|-------------|------------|------------|-------------|
| 10/14/2013 9:00  | 0 | 264.4304592 | 264.4359728 | 264.414048 | 264.403664 | 264.4077664 |
| 10/14/2013 9:10  | 0 | 264.4344216 | 264.4449728 | 264.419048 | 264.404664 | 264.4117664 |
| 10/14/2013 9:20  | 0 | 264.4386888 | 264.4519728 | 264.420048 | 264.404664 | 264.4147664 |
| 10/14/2013 9:30  | 0 | 264.439908  | 264.4419728 | 264.424048 | 264.402664 | 264.4117664 |
| 10/14/2013 9:40  | 0 | 264.4423464 | 264.4529728 | 264.429048 | 264.406664 | 264.4187664 |
| 10/14/2013 9:50  | 0 | 264.4423464 | 264.4479728 | 264.430048 | 264.404664 | 264.4157664 |
| 10/14/2013 10:00 | 0 | 264.4438704 | 264.4459728 | 264.431048 | 264.404664 | 264.4167664 |
| 10/14/2013 10:10 | 0 | 264.4453944 | 264.4539728 | 264.433048 | 264.402664 | 264.4187664 |
| 10/14/2013 10:20 | 0 | 264.4447848 | 264.4449728 | 264.437048 | 264.407664 | 264.4167664 |
| 10/14/2013 10:30 | 0 | 264.4472232 | 264.4549728 | 264.440048 | 264.404664 | 264.4207664 |
| 10/14/2013 10:40 | 0 | 264.446004  | 264.4439728 | 264.438048 | 264.405664 | 264.4177664 |
| 10/14/2013 10:50 | 0 | 264.4463088 | 264.4469728 | 264.440048 | 264.402664 | 264.4187664 |
| 10/14/2013 11:00 | 0 | 264.4441752 | 264.4389728 | 264.440048 | 264.405664 | 264.4187664 |
| 10/14/2013 11:10 | 0 | 264.4441752 | 264.4419728 | 264.438048 | 264.403664 | 264.4177664 |
| 10/14/2013 11:20 | 0 | 264.442956  | 264.4359728 | 264.440048 | 264.407664 | 264.4187664 |
| 10/14/2013 11:30 | 0 | 264.4432608 | 264.4409728 | 264.437048 | 264.403664 | 264.4167664 |
| 10/14/2013 11:40 | 0 | 264.4417368 | 264.4379728 | 264.439048 | 264.407664 | 264.4167664 |
| 10/14/2013 11:50 | 0 | 264.4411272 | 264.4359728 | 264.439048 | 264.403664 | 264.4147664 |
| 10/14/2013 12:00 | 0 | 264.4392984 | 264.4359728 | 264.439048 | 264.404664 | 264.4147664 |
| 10/14/2013 12:10 | 0 | 264.4402128 | 264.4379728 | 264.436048 | 264.404664 | 264.4167664 |
| 10/14/2013 12:20 | 0 | 264.4386888 | 264.4319728 | 264.438048 | 264.407664 | 264.4157664 |
| 10/14/2013 12:30 | 0 | 264.4396032 | 264.4379728 | 264.438048 | 264.408664 | 264.4177664 |
| 10/14/2013 12:40 | 0 | 264.4374696 | 264.4309728 | 264.437048 | 264.405664 | 264.4157664 |
| 10/14/2013 12:50 | 0 | 264.438384  | 264.4339728 | 264.434048 | 264.405664 | 264.4157664 |
| 10/14/2013 13:00 | 0 | 264.4374696 | 264.4309728 | 264.437048 | 264.407664 | 264.4157664 |
| 10/14/2013 13:10 | 0 | 264.4362504 | 264.4349728 | 264.434048 | 264.407664 | 264.4157664 |
| 10/14/2013 13:20 | 0 | 264.435336  | 264.4289728 | 264.439048 | 264.409664 | 264.4167664 |
| 10/14/2013 13:30 | 0 | 264.4344216 | 264.4309728 | 264.435048 | 264.407664 | 264.4147664 |
| 10/14/2013 13:40 | 0 | 264.4325928 | 264.4249728 | 264.435048 | 264.410664 | 264.4127664 |
| 10/14/2013 13:50 | 0 | 264.4335072 | 264.4329728 | 264.433048 | 264.410664 | 264.4157664 |
| 10/14/2013 14:00 | 0 | 264.4316784 | 264.4239728 | 264.435048 | 264.407664 | 264.4117664 |
| 10/14/2013 14:10 | 0 | 264.4325928 | 264.4279728 | 264.432048 | 264.407664 | 264.4127664 |
| 10/14/2013 14:20 | 0 | 264.4310688 | 264.4279728 | 264.431048 | 264.409664 | 264.4117664 |
| 10/14/2013 14:30 | 0 | 264.432288  | 264.4279728 | 264.431048 | 264.409664 | 264.4137664 |
| 10/14/2013 14:40 | 0 | 264.4325928 | 264.4299728 | 264.427048 | 264.407664 | 264.4117664 |
| 10/14/2013 14:50 | 0 | 264.4316784 | 264.4219728 | 264.430048 | 264.407664 | 264.4117664 |
| 10/14/2013 15:00 | 0 | 264.432288  | 264.4319728 | 264.429048 | 264.405664 | 264.4117664 |
| 10/14/2013 15:10 | 0 | 264.4301544 | 264.4199728 | 264.430048 | 264.406664 | 264.4097664 |
| 10/14/2013 15:20 | 0 | 264.4316784 | 264.4309728 | 264.429048 | 264.406664 | 264.4107664 |
| 10/14/2013 15:30 | 0 | 264.42924   | 264.4229728 | 264.429048 | 264.404664 | 264.4087664 |
| 10/14/2013 15:40 | 0 | 264.4301544 | 264.4259728 | 264.427048 | 264.405664 | 264.4087664 |
| 10/14/2013 15:50 | 0 | 264.4289352 | 264.4269728 | 264.429048 | 264.407664 | 264.4107664 |
| 10/14/2013 16:00 | 0 | 264.427716  | 264.4169728 | 264.426048 | 264.406664 | 264.4097664 |
| 10/14/2013 16:10 | 0 | 264.4283256 | 264.4269728 | 264.426048 | 264.404664 | 264.4097664 |
| 10/14/2013 16:20 | 0 | 264.4255824 | 264.4169728 | 264.424048 | 264.404664 | 264.4057664 |
| 10/14/2013 16:30 | 0 | 264.4274112 | 264.4209728 | 264.424048 | 264.405664 | 264.4067664 |
| 10/14/2013 16:40 | 0 | 264.4258872 | 264.4209728 | 264.424048 | 264.405664 | 264.4057664 |

|                  |        |             |             |            |            |             |
|------------------|--------|-------------|-------------|------------|------------|-------------|
| 10/14/2013 16:50 | 0      | 264.4249728 | 264.4159728 | 264.421048 | 264.405664 | 264.4037664 |
| 10/14/2013 17:00 | 0      | 264.4268016 | 264.4249728 | 264.423048 | 264.405664 | 264.4087664 |
| 10/14/2013 17:10 | 0      | 264.4252776 | 264.4169728 | 264.421048 | 264.405664 | 264.4067664 |
| 10/14/2013 17:20 | 0      | 264.4274112 | 264.4229728 | 264.420048 | 264.404664 | 264.4077664 |
| 10/14/2013 17:30 | 0      | 264.4255824 | 264.4219728 | 264.423048 | 264.409664 | 264.4057664 |
| 10/14/2013 17:40 | 0      | 264.4268016 | 264.4219728 | 264.424048 | 264.405664 | 264.4077664 |
| 10/14/2013 17:50 | 0      | 264.4268016 | 264.4249728 | 264.424048 | 264.410664 | 264.4087664 |
| 10/14/2013 18:00 | 0      | 264.4240584 | 264.4159728 | 264.420048 | 264.407664 | 264.4027664 |
| 10/14/2013 18:10 | 0      | 264.426192  | 264.4219728 | 264.420048 | 264.408664 | 264.4057664 |
| 10/14/2013 18:20 | 0      | 264.4243632 | 264.4189728 | 264.419048 | 264.407664 | 264.4027664 |
| 10/14/2013 18:30 | 0      | 264.4240584 | 264.4139728 | 264.420048 | 264.407664 | 264.4037664 |
| 10/14/2013 18:40 | 0      | 264.4264968 | 264.4239728 | 264.419048 | 264.407664 | 264.4057664 |
| 10/14/2013 18:50 | 0      | 264.424668  | 264.4169728 | 264.416048 | 264.405664 | 264.4027664 |
| 10/14/2013 19:00 | 0      | 264.4274112 | 264.4249728 | 264.423048 | 264.406664 | 264.4067664 |
| 10/14/2013 19:10 | 0      | 264.4271064 | 264.4279728 | 264.420048 | 264.407664 | 264.4067664 |
| 10/14/2013 19:20 | 0      | 264.42924   | 264.4259728 | 264.420048 | 264.405664 | 264.4067664 |
| 10/14/2013 19:30 | 0      | 264.4301544 | 264.4309728 | 264.422048 | 264.405664 | 264.4077664 |
| 10/14/2013 19:40 | 0      | 264.4310688 | 264.4249728 | 264.422048 | 264.406664 | 264.4087664 |
| 10/14/2013 19:50 | 0      | 264.4325928 | 264.4349728 | 264.422048 | 264.404664 | 264.4087664 |
| 10/14/2013 20:00 | 0      | 264.432288  | 264.4259728 | 264.422048 | 264.407664 | 264.4097664 |
| 10/14/2013 20:10 | 0.0254 | 264.4332024 | 264.4339728 | 264.424048 | 264.407664 | 264.4107664 |
| 10/14/2013 20:20 | 0.0254 | 264.4350312 | 264.4339728 | 264.425048 | 264.406664 | 264.4117664 |
| 10/14/2013 20:30 | 0.0254 | 264.4344216 | 264.4289728 | 264.424048 | 264.404664 | 264.4087664 |
| 10/14/2013 20:40 | 0.0254 | 264.4374696 | 264.4369728 | 264.425048 | 264.407664 | 264.4137664 |
| 10/14/2013 20:50 | 0.0254 | 264.4380792 | 264.4379728 | 264.428048 | 264.406664 | 264.4147664 |
| 10/14/2013 21:00 | 0.0254 | 264.438384  | 264.4349728 | 264.426048 | 264.405664 | 264.4147664 |
| 10/14/2013 21:10 | 0.0254 | 264.4408224 | 264.4449728 | 264.431048 | 264.407664 | 264.4167664 |
| 10/14/2013 21:20 | 0.0254 | 264.441432  | 264.4419728 | 264.429048 | 264.407664 | 264.4167664 |
| 10/14/2013 21:30 | 0.0254 | 264.4417368 | 264.4419728 | 264.433048 | 264.405664 | 264.4187664 |
| 10/14/2013 21:40 | 0.0254 | 264.441432  | 264.4419728 | 264.433048 | 264.407664 | 264.4167664 |
| 10/14/2013 21:50 | 0.0254 | 264.439908  | 264.4339728 | 264.433048 | 264.405664 | 264.4167664 |
| 10/14/2013 22:00 | 0.0508 | 264.4396032 | 264.4389728 | 264.435048 | 264.407664 | 264.4167664 |
| 10/14/2013 22:10 | 0.0508 | 264.4402128 | 264.4389728 | 264.433048 | 264.405664 | 264.4167664 |
| 10/14/2013 22:20 | 0.0508 | 264.4417368 | 264.4429728 | 264.435048 | 264.407664 | 264.4197664 |
| 10/14/2013 22:30 | 0.0508 | 264.4438704 | 264.4459728 | 264.436048 | 264.407664 | 264.4227664 |
| 10/14/2013 22:40 | 0.0508 | 264.4441752 | 264.4439728 | 264.436048 | 264.406664 | 264.4217664 |
| 10/14/2013 22:50 | 0.0508 | 264.4432608 | 264.4409728 | 264.435048 | 264.408664 | 264.4187664 |
| 10/14/2013 23:00 | 0.0508 | 264.4426512 | 264.4399728 | 264.436048 | 264.407664 | 264.4197664 |
| 10/14/2013 23:10 | 0.0508 | 264.4411272 | 264.4359728 | 264.435048 | 264.404664 | 264.4187664 |
| 10/14/2013 23:20 | 0.0508 | 264.4389936 | 264.4289728 | 264.435048 | 264.409664 | 264.4157664 |
| 10/14/2013 23:30 | 0.0508 | 264.4386888 | 264.4329728 | 264.433048 | 264.408664 | 264.4167664 |
| 10/14/2013 23:40 | 0.0508 | 264.43686   | 264.4259728 | 264.434048 | 264.407664 | 264.4167664 |
| 10/14/2013 23:50 | 0.0508 | 264.4347264 | 264.4279728 | 264.432048 | 264.405664 | 264.4147664 |
| 10/15/2013 0:00  | 0.0508 | 264.4350312 | 264.4279728 | 264.432048 | 264.407664 | 264.4147664 |
| 10/15/2013 0:10  | 0.0254 | 264.4316784 | 264.4259728 | 264.430048 | 264.409664 | 264.4127664 |
| 10/15/2013 0:20  | 0.0762 | 264.4319832 | 264.4249728 | 264.431048 | 264.410664 | 264.4137664 |
| 10/15/2013 0:30  | 0.254  | 264.4301544 | 264.4229728 | 264.429048 | 264.408664 | 264.4117664 |

|                 |        |             |             |            |            |             |
|-----------------|--------|-------------|-------------|------------|------------|-------------|
| 10/15/2013 0:40 | 0.4318 | 264.4313736 | 264.4209728 | 264.428048 | 264.406664 | 264.4117664 |
| 10/15/2013 0:50 | 0.6096 | 264.432288  | 264.4279728 | 264.429048 | 264.408664 | 264.4147664 |
| 10/15/2013 1:00 | 0.6604 | 264.4332024 | 264.4219728 | 264.427048 | 264.410664 | 264.4147664 |
| 10/15/2013 1:10 | 0.6858 | 264.433812  | 264.4299728 | 264.427048 | 264.410664 | 264.4137664 |
| 10/15/2013 1:20 | 0.6858 | 264.4301544 | 264.4139728 | 264.427048 | 264.409664 | 264.4107664 |
| 10/15/2013 1:30 | 0.6858 | 264.4316784 | 264.4229728 | 264.426048 | 264.408664 | 264.4157664 |
| 10/15/2013 1:40 | 0.7112 | 264.4286304 | 264.4179728 | 264.427048 | 264.412664 | 264.4147664 |
| 10/15/2013 1:50 | 0.7112 | 264.4341168 | 264.4299728 | 264.424048 | 264.408664 | 264.4157664 |
| 10/15/2013 2:00 | 0.7112 | 264.4661208 | 264.5379728 | 264.433048 | 264.407664 | 264.4457664 |
| 10/15/2013 2:10 | 0.7112 | 264.503916  | 264.6089728 | 264.472048 | 264.410664 | 264.4787664 |
| 10/15/2013 2:20 | 0.7112 | 264.5365296 | 264.6399728 | 264.516048 | 264.413664 | 264.5007664 |
| 10/15/2013 2:30 | 0.7112 | 264.5560368 | 264.6419728 | 264.547048 | 264.414664 | 264.5067664 |
| 10/15/2013 2:40 | 0.7112 | 264.5642664 | 264.6279728 | 264.571048 | 264.414664 | 264.5067664 |
| 10/15/2013 2:50 | 0.7112 | 264.5664    | 264.6139728 | 264.585048 | 264.416664 | 264.5067664 |
| 10/15/2013 3:00 | 0.7112 | 264.5615232 | 264.5919728 | 264.588048 | 264.419664 | 264.5027664 |
| 10/15/2013 3:10 | 0.7112 | 264.5535984 | 264.5689728 | 264.586048 | 264.418664 | 264.4957664 |
| 10/15/2013 3:20 | 0.7112 | 264.5459784 | 264.5569728 | 264.582048 | 264.421664 | 264.4927664 |
| 10/15/2013 3:30 | 0.7112 | 264.53592   | 264.5359728 | 264.572048 | 264.420664 | 264.4857664 |
| 10/15/2013 3:40 | 0.7112 | 264.5249472 | 264.5159728 | 264.563048 | 264.421664 | 264.4797664 |
| 10/15/2013 3:50 | 0.7112 | 264.5185464 | 264.5109728 | 264.552048 | 264.421664 | 264.4757664 |
| 10/15/2013 4:00 | 0.7112 | 264.508488  | 264.4959728 | 264.544048 | 264.422664 | 264.4697664 |
| 10/15/2013 4:10 | 0.7112 | 264.5036112 | 264.4869728 | 264.533048 | 264.425664 | 264.4677664 |
| 10/15/2013 4:20 | 0.7112 | 264.5017824 | 264.4909728 | 264.522048 | 264.424664 | 264.4667664 |
| 10/15/2013 4:30 | 0.7112 | 264.5045256 | 264.5009728 | 264.517048 | 264.426664 | 264.4687664 |
| 10/15/2013 4:40 | 0.7112 | 264.5081832 | 264.5079728 | 264.516048 | 264.426664 | 264.4707664 |
| 10/15/2013 4:50 | 0.7112 | 264.5151936 | 264.5129728 | 264.514048 | 264.425664 | 264.4727664 |
| 10/15/2013 5:00 | 0.7112 | 264.5188512 | 264.5219728 | 264.515048 | 264.424664 | 264.4737664 |
| 10/15/2013 5:10 | 0.7112 | 264.5243376 | 264.5299728 | 264.517048 | 264.426664 | 264.4807664 |
| 10/15/2013 5:20 | 0.7112 | 264.525252  | 264.5289728 | 264.519048 | 264.427664 | 264.4807664 |
| 10/15/2013 5:30 | 0.7112 | 264.5255568 | 264.5269728 | 264.521048 | 264.431664 | 264.4817664 |
| 10/15/2013 5:40 | 0.7112 | 264.5264712 | 264.5279728 | 264.521048 | 264.430664 | 264.4837664 |
| 10/15/2013 5:50 | 0.7112 | 264.5264712 | 264.5289728 | 264.523048 | 264.428664 | 264.4837664 |
| 10/15/2013 6:00 | 0.7112 | 264.526776  | 264.5259728 | 264.522048 | 264.432664 | 264.4837664 |
| 10/15/2013 6:10 | 0.7112 | 264.5264712 | 264.5259728 | 264.522048 | 264.432664 | 264.4827664 |
| 10/15/2013 6:20 | 0.7112 | 264.5261664 | 264.5249728 | 264.520048 | 264.432664 | 264.4827664 |
| 10/15/2013 6:30 | 0.7112 | 264.5249472 | 264.5229728 | 264.520048 | 264.433664 | 264.4827664 |
| 10/15/2013 6:40 | 0.7112 | 264.5255568 | 264.5229728 | 264.521048 | 264.434664 | 264.4847664 |
| 10/15/2013 6:50 | 0.7112 | 264.523728  | 264.5169728 | 264.519048 | 264.433664 | 264.4797664 |
| 10/15/2013 7:00 | 0.7112 | 264.5231184 | 264.5189728 | 264.517048 | 264.433664 | 264.4797664 |
| 10/15/2013 7:10 | 0.7112 | 264.5203752 | 264.5169728 | 264.519048 | 264.434664 | 264.4807664 |
| 10/15/2013 7:20 | 0.7112 | 264.5194608 | 264.5119728 | 264.517048 | 264.436664 | 264.4827664 |
| 10/15/2013 7:30 | 0.7112 | 264.5194608 | 264.5139728 | 264.516048 | 264.436664 | 264.4827664 |
| 10/15/2013 7:40 | 0.7112 | 264.5182416 | 264.5119728 | 264.516048 | 264.438664 | 264.4817664 |
| 10/15/2013 7:50 | 0.7112 | 264.5182416 | 264.5139728 | 264.516048 | 264.437664 | 264.4837664 |
| 10/15/2013 8:00 | 0.7112 | 264.5185464 | 264.5139728 | 264.514048 | 264.443664 | 264.4817664 |
| 10/15/2013 8:10 | 0.7112 | 264.5185464 | 264.5129728 | 264.513048 | 264.440664 | 264.4807664 |
| 10/15/2013 8:20 | 0.7112 | 264.5182416 | 264.5129728 | 264.511048 | 264.439664 | 264.4797664 |

|                  |        |             |             |            |            |             |
|------------------|--------|-------------|-------------|------------|------------|-------------|
| 10/15/2013 8:30  | 0.7112 | 264.5197656 | 264.5129728 | 264.511048 | 264.439664 | 264.4827664 |
| 10/15/2013 8:40  | 0.7112 | 264.5212896 | 264.5179728 | 264.512048 | 264.440664 | 264.4847664 |
| 10/15/2013 8:50  | 0.7112 | 264.5225088 | 264.5229728 | 264.516048 | 264.442664 | 264.4867664 |
| 10/15/2013 9:00  | 0.7112 | 264.522204  | 264.5159728 | 264.513048 | 264.441664 | 264.4837664 |
| 10/15/2013 9:10  | 0.7112 | 264.522204  | 264.5159728 | 264.512048 | 264.441664 | 264.4847664 |
| 10/15/2013 9:20  | 0.7112 | 264.5234232 | 264.5209728 | 264.513048 | 264.441664 | 264.4837664 |
| 10/15/2013 9:30  | 0.7112 | 264.5212896 | 264.5139728 | 264.514048 | 264.442664 | 264.4847664 |
| 10/15/2013 9:40  | 0.7112 | 264.5228136 | 264.5189728 | 264.513048 | 264.443664 | 264.4837664 |
| 10/15/2013 9:50  | 0.7112 | 264.5188512 | 264.5089728 | 264.514048 | 264.443664 | 264.4837664 |
| 10/15/2013 10:00 | 0.7112 | 264.5188512 | 264.5089728 | 264.516048 | 264.445664 | 264.4837664 |
| 10/15/2013 10:10 | 0.7112 | 264.5139744 | 264.5049728 | 264.513048 | 264.445664 | 264.4817664 |
| 10/15/2013 10:20 | 0.7112 | 264.5127552 | 264.5009728 | 264.512048 | 264.447664 | 264.4817664 |
| 10/15/2013 10:30 | 0.7112 | 264.5109264 | 264.5009728 | 264.509048 | 264.445664 | 264.4807664 |
| 10/15/2013 10:40 | 0.7112 | 264.5097072 | 264.4999728 | 264.510048 | 264.445664 | 264.4817664 |
| 10/15/2013 10:50 | 0.7112 | 264.5078784 | 264.4999728 | 264.506048 | 264.448664 | 264.4807664 |
| 10/15/2013 11:00 | 0.7112 | 264.5060496 | 264.4949728 | 264.504048 | 264.445664 | 264.4777664 |
| 10/15/2013 11:10 | 0.7112 | 264.5066592 | 264.4969728 | 264.503048 | 264.447664 | 264.4797664 |
| 10/15/2013 11:20 | 0.7112 | 264.5026968 | 264.4899728 | 264.502048 | 264.447664 | 264.4757664 |
| 10/15/2013 11:30 | 0.7112 | 264.503916  | 264.4959728 | 264.500048 | 264.450664 | 264.4777664 |
| 10/15/2013 11:40 | 0.7112 | 264.5005632 | 264.4879728 | 264.498048 | 264.446664 | 264.4747664 |
| 10/15/2013 11:50 | 0.7112 | 264.5011728 | 264.4929728 | 264.497048 | 264.448664 | 264.4747664 |
| 10/15/2013 12:00 | 0.7112 | 264.4981248 | 264.4859728 | 264.496048 | 264.448664 | 264.4727664 |
| 10/15/2013 12:10 | 0.7112 | 264.4984296 | 264.4879728 | 264.492048 | 264.449664 | 264.4717664 |
| 10/15/2013 12:20 | 0.7112 | 264.4956864 | 264.4829728 | 264.494048 | 264.450664 | 264.4727664 |
| 10/15/2013 12:30 | 0.7112 | 264.4956864 | 264.4859728 | 264.490048 | 264.448664 | 264.4717664 |
| 10/15/2013 12:40 | 0.7112 | 264.4923336 | 264.4779728 | 264.490048 | 264.450664 | 264.4707664 |
| 10/15/2013 12:50 | 0.7112 | 264.4929432 | 264.4829728 | 264.488048 | 264.450664 | 264.4717664 |
| 10/15/2013 13:00 | 0.7112 | 264.4908096 | 264.4789728 | 264.486048 | 264.450664 | 264.4697664 |
| 10/15/2013 13:10 | 0.7112 | 264.4889808 | 264.4729728 | 264.485048 | 264.449664 | 264.4657664 |
| 10/15/2013 13:20 | 0.7112 | 264.4902    | 264.4789728 | 264.482048 | 264.449664 | 264.4677664 |
| 10/15/2013 13:30 | 0.7112 | 264.4874568 | 264.4709728 | 264.481048 | 264.449664 | 264.4637664 |
| 10/15/2013 13:40 | 0.7112 | 264.4889808 | 264.4779728 | 264.481048 | 264.449664 | 264.4657664 |
| 10/15/2013 13:50 | 0.7112 | 264.4862376 | 264.4739728 | 264.481048 | 264.449664 | 264.4637664 |
| 10/15/2013 14:00 | 0.7112 | 264.4877616 | 264.4759728 | 264.478048 | 264.447664 | 264.4657664 |
| 10/15/2013 14:10 | 0.7112 | 264.4847136 | 264.4709728 | 264.477048 | 264.451664 | 264.4637664 |
| 10/15/2013 14:20 | 0.7112 | 264.4847136 | 264.4719728 | 264.477048 | 264.449664 | 264.4637664 |
| 10/15/2013 14:30 | 0.7112 | 264.485628  | 264.4769728 | 264.476048 | 264.452664 | 264.4647664 |
| 10/15/2013 14:40 | 0.7112 | 264.4834944 | 264.4709728 | 264.476048 | 264.452664 | 264.4617664 |
| 10/15/2013 14:50 | 0.7112 | 264.484104  | 264.4749728 | 264.476048 | 264.450664 | 264.4647664 |
| 10/15/2013 15:00 | 0.7112 | 264.4813608 | 264.4639728 | 264.473048 | 264.447664 | 264.4607664 |
| 10/15/2013 15:10 | 0.7112 | 264.48258   | 264.4719728 | 264.473048 | 264.449664 | 264.4607664 |
| 10/15/2013 15:20 | 0.7112 | 264.4798368 | 264.4639728 | 264.472048 | 264.452664 | 264.4587664 |
| 10/15/2013 15:30 | 0.7112 | 264.4813608 | 264.4719728 | 264.472048 | 264.451664 | 264.4607664 |
| 10/15/2013 15:40 | 0.7112 | 264.4786176 | 264.4639728 | 264.472048 | 264.451664 | 264.4587664 |
| 10/15/2013 15:50 | 0.7112 | 264.4807512 | 264.4729728 | 264.469048 | 264.450664 | 264.4597664 |
| 10/15/2013 16:00 | 0.7112 | 264.4777032 | 264.4649728 | 264.470048 | 264.451664 | 264.4577664 |
| 10/15/2013 16:10 | 0.7112 | 264.4773984 | 264.4669728 | 264.468048 | 264.452664 | 264.4577664 |

|                  |        |             |             |            |            |             |
|------------------|--------|-------------|-------------|------------|------------|-------------|
| 10/15/2013 16:20 | 0.7112 | 264.476484  | 264.4589728 | 264.469048 | 264.450664 | 264.4567664 |
| 10/15/2013 16:30 | 0.7112 | 264.4773984 | 264.4689728 | 264.468048 | 264.454664 | 264.4577664 |
| 10/15/2013 16:40 | 0.7112 | 264.4746552 | 264.4599728 | 264.469048 | 264.450664 | 264.4547664 |
| 10/15/2013 16:50 | 0.7112 | 264.4743504 | 264.4589728 | 264.465048 | 264.452664 | 264.4547664 |
| 10/15/2013 17:00 | 0.7112 | 264.4740456 | 264.4619728 | 264.465048 | 264.454664 | 264.4567664 |
| 10/15/2013 17:10 | 0.7112 | 264.4740456 | 264.4619728 | 264.462048 | 264.451664 | 264.4537664 |
| 10/15/2013 17:20 | 0.7112 | 264.4722168 | 264.4569728 | 264.462048 | 264.451664 | 264.4537664 |
| 10/15/2013 17:30 | 0.7112 | 264.473436  | 264.4619728 | 264.461048 | 264.451664 | 264.4537664 |
| 10/15/2013 17:40 | 0.7112 | 264.471912  | 264.4579728 | 264.461048 | 264.451664 | 264.4537664 |
| 10/15/2013 17:50 | 0.7112 | 264.4706928 | 264.4559728 | 264.461048 | 264.451664 | 264.4517664 |
| 10/15/2013 18:00 | 0.7112 | 264.4713024 | 264.4589728 | 264.459048 | 264.453664 | 264.4537664 |
| 10/15/2013 18:10 | 0.7112 | 264.4725216 | 264.4629728 | 264.458048 | 264.450664 | 264.4527664 |
| 10/15/2013 18:20 | 0.7112 | 264.470388  | 264.4529728 | 264.459048 | 264.451664 | 264.4507664 |
| 10/15/2013 18:30 | 0.7112 | 264.4725216 | 264.4609728 | 264.461048 | 264.448664 | 264.4507664 |
| 10/15/2013 18:40 | 0.7112 | 264.4716072 | 264.4629728 | 264.459048 | 264.451664 | 264.4537664 |
| 10/15/2013 18:50 | 0.7112 | 264.4722168 | 264.4609728 | 264.461048 | 264.452664 | 264.4527664 |
| 10/15/2013 19:00 | 0.7112 | 264.473436  | 264.4669728 | 264.461048 | 264.449664 | 264.4517664 |
| 10/15/2013 19:10 | 0.7112 | 264.4725216 | 264.4599728 | 264.458048 | 264.451664 | 264.4517664 |
| 10/15/2013 19:20 | 0.7112 | 264.4755696 | 264.4669728 | 264.460048 | 264.448664 | 264.4517664 |
| 10/15/2013 19:30 | 0.7112 | 264.4728264 | 264.4599728 | 264.463048 | 264.451664 | 264.4517664 |
| 10/15/2013 19:40 | 0.7112 | 264.4761792 | 264.4689728 | 264.459048 | 264.448664 | 264.4527664 |
| 10/15/2013 19:50 | 0.7112 | 264.4737408 | 264.4639728 | 264.461048 | 264.450664 | 264.4537664 |
| 10/15/2013 20:00 | 0.7112 | 264.4770936 | 264.4689728 | 264.463048 | 264.450664 | 264.4547664 |
| 10/15/2013 20:10 | 0.7112 | 264.4746552 | 264.4649728 | 264.462048 | 264.451664 | 264.4527664 |
| 10/15/2013 20:20 | 0.7112 | 264.4786176 | 264.4709728 | 264.463048 | 264.451664 | 264.4547664 |
| 10/15/2013 20:30 | 0.7112 | 264.4770936 | 264.4649728 | 264.464048 | 264.453664 | 264.4547664 |
| 10/15/2013 20:40 | 0.7112 | 264.4783128 | 264.4729728 | 264.466048 | 264.453664 | 264.4557664 |
| 10/15/2013 20:50 | 0.7112 | 264.4801416 | 264.4739728 | 264.466048 | 264.452664 | 264.4567664 |
| 10/15/2013 21:00 | 0.7112 | 264.4783128 | 264.4689728 | 264.466048 | 264.452664 | 264.4537664 |
| 10/15/2013 21:10 | 0.7112 | 264.4801416 | 264.4719728 | 264.467048 | 264.452664 | 264.4557664 |
| 10/15/2013 21:20 | 0.7112 | 264.4804464 | 264.4699728 | 264.468048 | 264.452664 | 264.4557664 |
| 10/15/2013 21:30 | 0.7112 | 264.4786176 | 264.4699728 | 264.470048 | 264.451664 | 264.4557664 |
| 10/15/2013 21:40 | 0.7112 | 264.481056  | 264.4749728 | 264.468048 | 264.450664 | 264.4577664 |
| 10/15/2013 21:50 | 0.7112 | 264.4804464 | 264.4719728 | 264.470048 | 264.452664 | 264.4567664 |
| 10/15/2013 22:00 | 0.7112 | 264.481056  | 264.4719728 | 264.470048 | 264.450664 | 264.4557664 |
| 10/15/2013 22:10 | 0.7112 | 264.4801416 | 264.4709728 | 264.470048 | 264.452664 | 264.4577664 |
| 10/15/2013 22:20 | 0.7112 | 264.4807512 | 264.4739728 | 264.470048 | 264.450664 | 264.4557664 |
| 10/15/2013 22:30 | 0.7112 | 264.4801416 | 264.4719728 | 264.471048 | 264.453664 | 264.4587664 |
| 10/15/2013 22:40 | 0.7112 | 264.4789224 | 264.4689728 | 264.470048 | 264.454664 | 264.4557664 |
| 10/15/2013 22:50 | 0.7112 | 264.478008  | 264.4639728 | 264.471048 | 264.452664 | 264.4537664 |
| 10/15/2013 23:00 | 0.7112 | 264.478008  | 264.4689728 | 264.468048 | 264.452664 | 264.4537664 |
| 10/15/2013 23:10 | 0.7112 | 264.4767888 | 264.4669728 | 264.470048 | 264.453664 | 264.4557664 |
| 10/15/2013 23:20 | 0.7112 | 264.4755696 | 264.4659728 | 264.470048 | 264.452664 | 264.4537664 |
| 10/15/2013 23:30 | 0.7112 | 264.4755696 | 264.4659728 | 264.467048 | 264.450664 | 264.4557664 |
| 10/15/2013 23:40 | 0.7112 | 264.4728264 | 264.4619728 | 264.468048 | 264.452664 | 264.4537664 |
| 10/15/2013 23:50 | 0.7112 | 264.4728264 | 264.4609728 | 264.466048 | 264.452664 | 264.4547664 |
| 10/16/2013 0:00  | 0.7112 | 264.4694736 | 264.4549728 | 264.462048 | 264.451664 | 264.4497664 |

|                 |   |             |             |            |            |             |
|-----------------|---|-------------|-------------|------------|------------|-------------|
| 10/16/2013 0:10 | 0 | 264.4706928 | 264.4579728 | 264.462048 | 264.449664 | 264.4497664 |
| 10/16/2013 0:20 | 0 | 264.4667304 | 264.4479728 | 264.459048 | 264.451664 | 264.4477664 |
| 10/16/2013 0:30 | 0 | 264.4676448 | 264.4539728 | 264.458048 | 264.452664 | 264.4487664 |
| 10/16/2013 0:40 | 0 | 264.464292  | 264.4459728 | 264.456048 | 264.452664 | 264.4477664 |
| 10/16/2013 0:50 | 0 | 264.4633776 | 264.4439728 | 264.456048 | 264.452664 | 264.4477664 |
| 10/16/2013 1:00 | 0 | 264.4624632 | 264.4449728 | 264.452048 | 264.451664 | 264.4457664 |
| 10/16/2013 1:10 | 0 | 264.4603296 | 264.4369728 | 264.452048 | 264.452664 | 264.4447664 |
| 10/16/2013 1:20 | 0 | 264.4603296 | 264.4449728 | 264.450048 | 264.449664 | 264.4427664 |
| 10/16/2013 1:30 | 0 | 264.456672  | 264.4319728 | 264.448048 | 264.451664 | 264.4407664 |
| 10/16/2013 1:40 | 0 | 264.4572816 | 264.4429728 | 264.446048 | 264.449664 | 264.4427664 |
| 10/16/2013 1:50 | 0 | 264.453624  | 264.4299728 | 264.444048 | 264.451664 | 264.4407664 |
| 10/16/2013 2:00 | 0 | 264.4530144 | 264.4319728 | 264.443048 | 264.453664 | 264.4377664 |
| 10/16/2013 2:10 | 0 | 264.4508808 | 264.4299728 | 264.440048 | 264.451664 | 264.4357664 |
| 10/16/2013 2:20 | 0 | 264.449052  | 264.4239728 | 264.437048 | 264.451664 | 264.4357664 |
| 10/16/2013 2:30 | 0 | 264.4487472 | 264.4269728 | 264.435048 | 264.449664 | 264.4347664 |
| 10/16/2013 2:40 | 0 | 264.4469184 | 264.4249728 | 264.433048 | 264.449664 | 264.4347664 |
| 10/16/2013 2:50 | 0 | 264.4456992 | 264.4209728 | 264.433048 | 264.451664 | 264.4327664 |
| 10/16/2013 3:00 | 0 | 264.4447848 | 264.4219728 | 264.429048 | 264.449664 | 264.4317664 |
| 10/16/2013 3:10 | 0 | 264.4438704 | 264.4219728 | 264.432048 | 264.453664 | 264.4327664 |
| 10/16/2013 3:20 | 0 | 264.4426512 | 264.4199728 | 264.428048 | 264.449664 | 264.4307664 |
| 10/16/2013 3:30 | 0 | 264.441432  | 264.4169728 | 264.429048 | 264.451664 | 264.4307664 |
| 10/16/2013 3:40 | 0 | 264.4389936 | 264.4139728 | 264.427048 | 264.451664 | 264.4287664 |
| 10/16/2013 3:50 | 0 | 264.4380792 | 264.4119728 | 264.423048 | 264.449664 | 264.4277664 |
| 10/16/2013 4:00 | 0 | 264.4371648 | 264.4119728 | 264.421048 | 264.449664 | 264.4277664 |
| 10/16/2013 4:10 | 0 | 264.4359456 | 264.4089728 | 264.419048 | 264.447664 | 264.4227664 |
| 10/16/2013 4:20 | 0 | 264.4350312 | 264.4109728 | 264.419048 | 264.447664 | 264.4227664 |
| 10/16/2013 4:30 | 0 | 264.4344216 | 264.4109728 | 264.419048 | 264.445664 | 264.4227664 |
| 10/16/2013 4:40 | 0 | 264.433812  | 264.4109728 | 264.417048 | 264.447664 | 264.4217664 |
| 10/16/2013 4:50 | 0 | 264.4328976 | 264.4079728 | 264.416048 | 264.447664 | 264.4197664 |
| 10/16/2013 5:00 | 0 | 264.4319832 | 264.4109728 | 264.416048 | 264.448664 | 264.4217664 |
| 10/16/2013 5:10 | 0 | 264.4310688 | 264.4079728 | 264.413048 | 264.447664 | 264.4217664 |
| 10/16/2013 5:20 | 0 | 264.4304592 | 264.4079728 | 264.415048 | 264.445664 | 264.4197664 |
| 10/16/2013 5:30 | 0 | 264.4301544 | 264.4079728 | 264.413048 | 264.445664 | 264.4217664 |
| 10/16/2013 5:40 | 0 | 264.4295448 | 264.4089728 | 264.412048 | 264.446664 | 264.4197664 |
| 10/16/2013 5:50 | 0 | 264.4289352 | 264.4089728 | 264.411048 | 264.446664 | 264.4197664 |
| 10/16/2013 6:00 | 0 | 264.4283256 | 264.4079728 | 264.412048 | 264.445664 | 264.4177664 |
| 10/16/2013 6:10 | 0 | 264.4280208 | 264.4059728 | 264.409048 | 264.443664 | 264.4197664 |
| 10/16/2013 6:20 | 0 | 264.427716  | 264.4059728 | 264.409048 | 264.445664 | 264.4177664 |
| 10/16/2013 6:30 | 0 | 264.427716  | 264.4109728 | 264.409048 | 264.445664 | 264.4177664 |
| 10/16/2013 6:40 | 0 | 264.4280208 | 264.4129728 | 264.411048 | 264.447664 | 264.4177664 |
| 10/16/2013 6:50 | 0 | 264.4283256 | 264.4099728 | 264.408048 | 264.444664 | 264.4167664 |
| 10/16/2013 7:00 | 0 | 264.4289352 | 264.4099728 | 264.408048 | 264.441664 | 264.4157664 |
| 10/16/2013 7:10 | 0 | 264.4313736 | 264.4199728 | 264.411048 | 264.440664 | 264.4217664 |
| 10/16/2013 7:20 | 0 | 264.4328976 | 264.4199728 | 264.412048 | 264.443664 | 264.4217664 |
| 10/16/2013 7:30 | 0 | 264.4344216 | 264.4249728 | 264.413048 | 264.442664 | 264.4217664 |
| 10/16/2013 7:40 | 0 | 264.4365552 | 264.4269728 | 264.415048 | 264.441664 | 264.4207664 |
| 10/16/2013 7:50 | 0 | 264.4396032 | 264.4329728 | 264.417048 | 264.443664 | 264.4257664 |

|                  |   |             |             |            |            |             |
|------------------|---|-------------|-------------|------------|------------|-------------|
| 10/16/2013 8:00  | 0 | 264.4420416 | 264.4379728 | 264.422048 | 264.442664 | 264.4287664 |
| 10/16/2013 8:10  | 0 | 264.4453944 | 264.4419728 | 264.421048 | 264.441664 | 264.4297664 |
| 10/16/2013 8:20  | 0 | 264.447528  | 264.4469728 | 264.427048 | 264.441664 | 264.4327664 |
| 10/16/2013 8:30  | 0 | 264.4517952 | 264.4519728 | 264.429048 | 264.440664 | 264.4337664 |
| 10/16/2013 8:40  | 0 | 264.4554528 | 264.4569728 | 264.435048 | 264.440664 | 264.4347664 |
| 10/16/2013 8:50  | 0 | 264.4572816 | 264.4569728 | 264.437048 | 264.440664 | 264.4367664 |
| 10/16/2013 9:00  | 0 | 264.45972   | 264.4569728 | 264.443048 | 264.440664 | 264.4387664 |
| 10/16/2013 9:10  | 0 | 264.4624632 | 264.4649728 | 264.447048 | 264.440664 | 264.4397664 |
| 10/16/2013 9:20  | 0 | 264.4633776 | 264.4569728 | 264.447048 | 264.439664 | 264.4387664 |
| 10/16/2013 9:30  | 0 | 264.4655112 | 264.4659728 | 264.449048 | 264.437664 | 264.4407664 |
| 10/16/2013 9:40  | 0 | 264.4661208 | 264.4669728 | 264.453048 | 264.439664 | 264.4427664 |
| 10/16/2013 9:50  | 0 | 264.4667304 | 264.4639728 | 264.455048 | 264.440664 | 264.4427664 |
| 10/16/2013 10:00 | 0 | 264.4670352 | 264.4609728 | 264.457048 | 264.440664 | 264.4447664 |
| 10/16/2013 10:10 | 0 | 264.4685592 | 264.4679728 | 264.459048 | 264.442664 | 264.4447664 |
| 10/16/2013 10:20 | 0 | 264.46734   | 264.4649728 | 264.459048 | 264.440664 | 264.4437664 |
| 10/16/2013 10:30 | 0 | 264.4667304 | 264.4599728 | 264.459048 | 264.441664 | 264.4437664 |
| 10/16/2013 10:40 | 0 | 264.4676448 | 264.4629728 | 264.460048 | 264.441664 | 264.4457664 |
| 10/16/2013 10:50 | 0 | 264.465816  | 264.4609728 | 264.460048 | 264.442664 | 264.4447664 |
| 10/16/2013 11:00 | 0 | 264.464292  | 264.4549728 | 264.459048 | 264.439664 | 264.4437664 |
| 10/16/2013 11:10 | 0 | 264.462768  | 264.4549728 | 264.460048 | 264.440664 | 264.4437664 |
| 10/16/2013 11:20 | 0 | 264.4630728 | 264.4569728 | 264.456048 | 264.441664 | 264.4427664 |
| 10/16/2013 11:30 | 0 | 264.4630728 | 264.4589728 | 264.457048 | 264.441664 | 264.4437664 |
| 10/16/2013 11:40 | 0 | 264.4652064 | 264.4569728 | 264.456048 | 264.439664 | 264.4437664 |
| 10/16/2013 11:50 | 0 | 264.4633776 | 264.4569728 | 264.457048 | 264.443664 | 264.4437664 |
| 10/16/2013 12:00 | 0 | 264.4624632 | 264.4519728 | 264.457048 | 264.442664 | 264.4437664 |
| 10/16/2013 12:10 | 0 | 264.462768  | 264.4589728 | 264.456048 | 264.442664 | 264.4457664 |
| 10/16/2013 12:20 | 0 | 264.45972   | 264.4469728 | 264.455048 | 264.442664 | 264.4427664 |
| 10/16/2013 12:30 | 0 | 264.4594152 | 264.4469728 | 264.456048 | 264.441664 | 264.4427664 |
| 10/16/2013 12:40 | 0 | 264.4591104 | 264.4519728 | 264.453048 | 264.442664 | 264.4417664 |
| 10/16/2013 12:50 | 0 | 264.4563672 | 264.4419728 | 264.451048 | 264.443664 | 264.4417664 |
| 10/16/2013 13:00 | 0 | 264.4569768 | 264.4469728 | 264.449048 | 264.443664 | 264.4417664 |
| 10/16/2013 13:10 | 0 | 264.4548432 | 264.4459728 | 264.451048 | 264.441664 | 264.4417664 |
| 10/16/2013 13:20 | 0 | 264.4545384 | 264.4399728 | 264.448048 | 264.441664 | 264.4377664 |
| 10/16/2013 13:30 | 0 | 264.455148  | 264.4489728 | 264.449048 | 264.444664 | 264.4427664 |
| 10/16/2013 13:40 | 0 | 264.4530144 | 264.4409728 | 264.445048 | 264.441664 | 264.4377664 |
| 10/16/2013 13:50 | 0 | 264.4539288 | 264.4429728 | 264.445048 | 264.443664 | 264.4397664 |
| 10/16/2013 14:00 | 0 | 264.4521    | 264.4409728 | 264.444048 | 264.441664 | 264.4377664 |
| 10/16/2013 14:10 | 0 | 264.4514904 | 264.4379728 | 264.444048 | 264.441664 | 264.4377664 |
| 10/16/2013 14:20 | 0 | 264.4517952 | 264.4399728 | 264.443048 | 264.439664 | 264.4377664 |
| 10/16/2013 14:30 | 0 | 264.4493568 | 264.4379728 | 264.443048 | 264.441664 | 264.4377664 |
| 10/16/2013 14:40 | 0 | 264.4508808 | 264.4379728 | 264.439048 | 264.439664 | 264.4357664 |
| 10/16/2013 14:50 | 0 | 264.4499664 | 264.4409728 | 264.439048 | 264.439664 | 264.4357664 |
| 10/16/2013 15:00 | 0 | 264.4481376 | 264.4349728 | 264.439048 | 264.439664 | 264.4327664 |
| 10/16/2013 15:10 | 0 | 264.4481376 | 264.4379728 | 264.438048 | 264.440664 | 264.4357664 |
| 10/16/2013 15:20 | 0 | 264.4481376 | 264.4379728 | 264.436048 | 264.439664 | 264.4327664 |
| 10/16/2013 15:30 | 0 | 264.4463088 | 264.4329728 | 264.436048 | 264.440664 | 264.4317664 |
| 10/16/2013 15:40 | 0 | 264.4481376 | 264.4389728 | 264.436048 | 264.439664 | 264.4337664 |



|                  |   |             |             |            |            |             |
|------------------|---|-------------|-------------|------------|------------|-------------|
| 10/16/2013 15:50 | 0 | 264.4469184 | 264.4379728 | 264.436048 | 264.440664 | 264.4337664 |
| 10/16/2013 16:00 | 0 | 264.4466136 | 264.4359728 | 264.435048 | 264.440664 | 264.4347664 |
| 10/16/2013 16:10 | 0 | 264.447528  | 264.4399728 | 264.436048 | 264.439664 | 264.4347664 |
| 10/16/2013 16:20 | 0 | 264.4450896 | 264.4349728 | 264.435048 | 264.438664 | 264.4317664 |
| 10/16/2013 16:30 | 0 | 264.4456992 | 264.4319728 | 264.434048 | 264.438664 | 264.4327664 |
| 10/16/2013 16:40 | 0 | 264.4450896 | 264.4369728 | 264.431048 | 264.438664 | 264.4297664 |
| 10/16/2013 16:50 | 0 | 264.4441752 | 264.4319728 | 264.434048 | 264.441664 | 264.4297664 |
| 10/16/2013 17:00 | 0 | 264.44448   | 264.4319728 | 264.432048 | 264.437664 | 264.4307664 |
| 10/16/2013 17:10 | 0 | 264.44448   | 264.4379728 | 264.431048 | 264.440664 | 264.4307664 |
| 10/16/2013 17:20 | 0 | 264.4426512 | 264.4289728 | 264.431048 | 264.437664 | 264.4277664 |
| 10/16/2013 17:30 | 0 | 264.44448   | 264.4369728 | 264.431048 | 264.439664 | 264.4297664 |
| 10/16/2013 17:40 | 0 | 264.441432  | 264.4289728 | 264.430048 | 264.437664 | 264.4277664 |
| 10/16/2013 17:50 | 0 | 264.4438704 | 264.4369728 | 264.430048 | 264.439664 | 264.4277664 |
| 10/16/2013 18:00 | 0 | 264.4423464 | 264.4319728 | 264.430048 | 264.439664 | 264.4267664 |
| 10/16/2013 18:10 | 0 | 264.4417368 | 264.4279728 | 264.428048 | 264.436664 | 264.4267664 |
| 10/16/2013 18:20 | 0 | 264.4423464 | 264.4339728 | 264.430048 | 264.438664 | 264.4267664 |
| 10/16/2013 18:30 | 0 | 264.441432  | 264.4319728 | 264.430048 | 264.438664 | 264.4287664 |
| 10/16/2013 18:40 | 0 | 264.4420416 | 264.4339728 | 264.430048 | 264.436664 | 264.4287664 |
| 10/16/2013 18:50 | 0 | 264.4435656 | 264.4349728 | 264.431048 | 264.439664 | 264.4297664 |
| 10/16/2013 19:00 | 0 | 264.442956  | 264.4359728 | 264.430048 | 264.440664 | 264.4267664 |
| 10/16/2013 19:10 | 0 | 264.4450896 | 264.4389728 | 264.430048 | 264.439664 | 264.4287664 |
| 10/16/2013 19:20 | 0 | 264.4450896 | 264.4379728 | 264.432048 | 264.438664 | 264.4287664 |
| 10/16/2013 19:30 | 0 | 264.4484424 | 264.4459728 | 264.434048 | 264.439664 | 264.4317664 |
| 10/16/2013 19:40 | 0 | 264.447528  | 264.4399728 | 264.434048 | 264.439664 | 264.4287664 |
| 10/16/2013 19:50 | 0 | 264.4502712 | 264.4459728 | 264.435048 | 264.438664 | 264.4337664 |
| 10/16/2013 20:00 | 0 | 264.4487472 | 264.4409728 | 264.436048 | 264.437664 | 264.4307664 |
| 10/16/2013 20:10 | 0 | 264.4524048 | 264.4479728 | 264.438048 | 264.439664 | 264.4337664 |
| 10/16/2013 20:20 | 0 | 264.4499664 | 264.4389728 | 264.439048 | 264.436664 | 264.4337664 |
| 10/16/2013 20:30 | 0 | 264.4530144 | 264.4519728 | 264.440048 | 264.436664 | 264.4337664 |
| 10/16/2013 20:40 | 0 | 264.4533192 | 264.4459728 | 264.442048 | 264.439664 | 264.4337664 |
| 10/16/2013 20:50 | 0 | 264.455148  | 264.4499728 | 264.442048 | 264.438664 | 264.4367664 |
| 10/16/2013 21:00 | 0 | 264.4548432 | 264.4459728 | 264.445048 | 264.438664 | 264.4387664 |
| 10/16/2013 21:10 | 0 | 264.4563672 | 264.4559728 | 264.442048 | 264.436664 | 264.4367664 |
| 10/16/2013 21:20 | 0 | 264.4578912 | 264.4539728 | 264.447048 | 264.437664 | 264.4387664 |
| 10/16/2013 21:30 | 0 | 264.4591104 | 264.4569728 | 264.449048 | 264.438664 | 264.4407664 |
| 10/16/2013 21:40 | 0 | 264.4575864 | 264.4509728 | 264.449048 | 264.439664 | 264.4387664 |
| 10/16/2013 21:50 | 0 | 264.4600248 | 264.4559728 | 264.449048 | 264.437664 | 264.4407664 |
| 10/16/2013 22:00 | 0 | 264.4609392 | 264.4569728 | 264.451048 | 264.440664 | 264.4417664 |
| 10/16/2013 22:10 | 0 | 264.4603296 | 264.4539728 | 264.450048 | 264.437664 | 264.4407664 |
| 10/16/2013 22:20 | 0 | 264.458196  | 264.4489728 | 264.450048 | 264.436664 | 264.4367664 |
| 10/16/2013 22:30 | 0 | 264.45972   | 264.4589728 | 264.453048 | 264.438664 | 264.4397664 |
| 10/16/2013 22:40 | 0 | 264.45972   | 264.4539728 | 264.451048 | 264.440664 | 264.4397664 |
| 10/16/2013 22:50 | 0 | 264.4585008 | 264.4459728 | 264.449048 | 264.436664 | 264.4367664 |
| 10/16/2013 23:00 | 0 | 264.4591104 | 264.4549728 | 264.450048 | 264.439664 | 264.4417664 |
| 10/16/2013 23:10 | 0 | 264.45972   | 264.4549728 | 264.453048 | 264.439664 | 264.4427664 |
| 10/16/2013 23:20 | 0 | 264.4585008 | 264.4489728 | 264.450048 | 264.437664 | 264.4397664 |
| 10/16/2013 23:30 | 0 | 264.4563672 | 264.4459728 | 264.451048 | 264.439664 | 264.4387664 |

|                  |   |             |             |            |            |             |
|------------------|---|-------------|-------------|------------|------------|-------------|
| 10/16/2013 23:40 | 0 | 264.4569768 | 264.4499728 | 264.449048 | 264.439664 | 264.4397664 |
| 10/16/2013 23:50 | 0 | 264.4539288 | 264.4399728 | 264.446048 | 264.436664 | 264.4357664 |
| 10/17/2013 0:00  | 0 | 264.4539288 | 264.4479728 | 264.448048 | 264.438664 | 264.4387664 |
| 10/17/2013 0:10  | 0 | 264.450576  | 264.4369728 | 264.446048 | 264.438664 | 264.4357664 |
| 10/17/2013 0:20  | 0 | 264.4521    | 264.4449728 | 264.444048 | 264.438664 | 264.4387664 |
| 10/17/2013 0:30  | 0 | 264.449052  | 264.4329728 | 264.445048 | 264.438664 | 264.4347664 |
| 10/17/2013 0:40  | 0 | 264.4487472 | 264.4399728 | 264.442048 | 264.436664 | 264.4347664 |
| 10/17/2013 0:50  | 0 | 264.446004  | 264.4299728 | 264.441048 | 264.438664 | 264.4327664 |
| 10/17/2013 1:00  | 0 | 264.4456992 | 264.4359728 | 264.440048 | 264.438664 | 264.4317664 |
| 10/17/2013 1:10  | 0 | 264.4411272 | 264.4199728 | 264.437048 | 264.438664 | 264.4287664 |
| 10/17/2013 1:20  | 0 | 264.4417368 | 264.4279728 | 264.434048 | 264.436664 | 264.4297664 |
| 10/17/2013 1:30  | 0 | 264.4371648 | 264.4189728 | 264.433048 | 264.438664 | 264.4247664 |
| 10/17/2013 1:40  | 0 | 264.435336  | 264.4119728 | 264.432048 | 264.436664 | 264.4237664 |
| 10/17/2013 1:50  | 0 | 264.433812  | 264.4179728 | 264.430048 | 264.441664 | 264.4257664 |
| 10/17/2013 2:00  | 0 | 264.432288  | 264.4149728 | 264.426048 | 264.436664 | 264.4227664 |
| 10/17/2013 2:10  | 0 | 264.4304592 | 264.4149728 | 264.425048 | 264.439664 | 264.4207664 |
| 10/17/2013 2:20  | 0 | 264.427716  | 264.4049728 | 264.421048 | 264.438664 | 264.4177664 |
| 10/17/2013 2:30  | 0 | 264.4283256 | 264.4099728 | 264.421048 | 264.437664 | 264.4207664 |
| 10/17/2013 2:40  | 0 | 264.426192  | 264.4049728 | 264.418048 | 264.439664 | 264.4157664 |
| 10/17/2013 2:50  | 0 | 264.4268016 | 264.4129728 | 264.417048 | 264.438664 | 264.4187664 |
| 10/17/2013 3:00  | 0 | 264.4240584 | 264.4059728 | 264.418048 | 264.439664 | 264.4177664 |
| 10/17/2013 3:10  | 0 | 264.4228392 | 264.4009728 | 264.412048 | 264.435664 | 264.4147664 |
| 10/17/2013 3:20  | 0 | 264.42162   | 264.4009728 | 264.412048 | 264.436664 | 264.4147664 |
| 10/17/2013 3:30  | 0 | 264.4207056 | 264.4009728 | 264.409048 | 264.434664 | 264.4147664 |
| 10/17/2013 3:40  | 0 | 264.420096  | 264.3989728 | 264.406048 | 264.434664 | 264.4107664 |
| 10/17/2013 3:50  | 0 | 264.4191816 | 264.3989728 | 264.407048 | 264.435664 | 264.4127664 |
| 10/17/2013 4:00  | 0 | 264.4182672 | 264.3969728 | 264.405048 | 264.435664 | 264.4107664 |
| 10/17/2013 4:10  | 0 | 264.4173528 | 264.3969728 | 264.405048 | 264.435664 | 264.4117664 |
| 10/17/2013 4:20  | 0 | 264.4161336 | 264.3949728 | 264.404048 | 264.436664 | 264.4097664 |
| 10/17/2013 4:30  | 0 | 264.415524  | 264.3929728 | 264.400048 | 264.433664 | 264.4087664 |
| 10/17/2013 4:40  | 0 | 264.4146096 | 264.3949728 | 264.399048 | 264.433664 | 264.4047664 |
| 10/17/2013 4:50  | 0 | 264.4143048 | 264.3929728 | 264.397048 | 264.433664 | 264.4067664 |
| 10/17/2013 5:00  | 0 | 264.414     | 264.3959728 | 264.397048 | 264.431664 | 264.4097664 |
| 10/17/2013 5:10  | 0 | 264.4136952 | 264.3979728 | 264.397048 | 264.434664 | 264.4097664 |
| 10/17/2013 5:20  | 0 | 264.4130856 | 264.3949728 | 264.396048 | 264.432664 | 264.4067664 |
| 10/17/2013 5:30  | 0 | 264.4130856 | 264.3989728 | 264.399048 | 264.432664 | 264.4077664 |
| 10/17/2013 5:40  | 0 | 264.4127808 | 264.3959728 | 264.396048 | 264.428664 | 264.4057664 |
| 10/17/2013 5:50  | 0 | 264.4127808 | 264.3939728 | 264.395048 | 264.428664 | 264.4057664 |
| 10/17/2013 6:00  | 0 | 264.412476  | 264.3939728 | 264.393048 | 264.428664 | 264.4047664 |
| 10/17/2013 6:10  | 0 | 264.4127808 | 264.3959728 | 264.395048 | 264.430664 | 264.4057664 |
| 10/17/2013 6:20  | 0 | 264.4127808 | 264.3989728 | 264.397048 | 264.429664 | 264.4057664 |
| 10/17/2013 6:30  | 0 | 264.4130856 | 264.3989728 | 264.395048 | 264.428664 | 264.4037664 |
| 10/17/2013 6:40  | 0 | 264.414     | 264.4009728 | 264.395048 | 264.430664 | 264.4057664 |
| 10/17/2013 6:50  | 0 | 264.4149144 | 264.4029728 | 264.397048 | 264.429664 | 264.4067664 |
| 10/17/2013 7:00  | 0 | 264.415524  | 264.4039728 | 264.395048 | 264.428664 | 264.4057664 |
| 10/17/2013 7:10  | 0 | 264.4182672 | 264.4109728 | 264.396048 | 264.428664 | 264.4077664 |
| 10/17/2013 7:20  | 0 | 264.4210104 | 264.4109728 | 264.397048 | 264.428664 | 264.4077664 |

|                  |   |             |             |            |            |             |
|------------------|---|-------------|-------------|------------|------------|-------------|
| 10/17/2013 7:30  | 0 | 264.4219248 | 264.4119728 | 264.399048 | 264.427664 | 264.4097664 |
| 10/17/2013 7:40  | 0 | 264.424668  | 264.4169728 | 264.401048 | 264.427664 | 264.4127664 |
| 10/17/2013 7:50  | 0 | 264.427716  | 264.4219728 | 264.403048 | 264.425664 | 264.4127664 |
| 10/17/2013 8:00  | 0 | 264.4301544 | 264.4269728 | 264.408048 | 264.426664 | 264.4147664 |
| 10/17/2013 8:10  | 0 | 264.433812  | 264.4349728 | 264.413048 | 264.428664 | 264.4157664 |
| 10/17/2013 8:20  | 0 | 264.43686   | 264.4359728 | 264.413048 | 264.424664 | 264.4167664 |
| 10/17/2013 8:30  | 0 | 264.4405176 | 264.4399728 | 264.417048 | 264.425664 | 264.4197664 |
| 10/17/2013 8:40  | 0 | 264.4435656 | 264.4459728 | 264.423048 | 264.429664 | 264.4237664 |
| 10/17/2013 8:50  | 0 | 264.4450896 | 264.4439728 | 264.426048 | 264.428664 | 264.4227664 |
| 10/17/2013 9:00  | 0 | 264.4481376 | 264.4489728 | 264.431048 | 264.429664 | 264.4287664 |
| 10/17/2013 9:10  | 0 | 264.4521    | 264.4569728 | 264.434048 | 264.427664 | 264.4307664 |
| 10/17/2013 9:20  | 0 | 264.4517952 | 264.4499728 | 264.438048 | 264.427664 | 264.4307664 |
| 10/17/2013 9:30  | 0 | 264.453624  | 264.4549728 | 264.442048 | 264.427664 | 264.4337664 |
| 10/17/2013 9:40  | 0 | 264.4545384 | 264.4549728 | 264.443048 | 264.427664 | 264.4347664 |
| 10/17/2013 9:50  | 0 | 264.458196  | 264.4629728 | 264.447048 | 264.428664 | 264.4367664 |
| 10/17/2013 10:00 | 0 | 264.45972   | 264.4579728 | 264.449048 | 264.427664 | 264.4367664 |
| 10/17/2013 10:10 | 0 | 264.4603296 | 264.4579728 | 264.450048 | 264.427664 | 264.4347664 |
| 10/17/2013 10:20 | 0 | 264.458196  | 264.4519728 | 264.450048 | 264.427664 | 264.4367664 |
| 10/17/2013 10:30 | 0 | 264.4575864 | 264.4529728 | 264.449048 | 264.428664 | 264.4327664 |
| 10/17/2013 10:40 | 0 | 264.4578912 | 264.4549728 | 264.451048 | 264.428664 | 264.4367664 |
| 10/17/2013 10:50 | 0 | 264.458196  | 264.4509728 | 264.451048 | 264.428664 | 264.4367664 |
| 10/17/2013 11:00 | 0 | 264.4575864 | 264.4529728 | 264.450048 | 264.429664 | 264.4377664 |
| 10/17/2013 11:10 | 0 | 264.456672  | 264.4479728 | 264.449048 | 264.428664 | 264.4347664 |
| 10/17/2013 11:20 | 0 | 264.4557576 | 264.4489728 | 264.450048 | 264.430664 | 264.4367664 |
| 10/17/2013 11:30 | 0 | 264.4554528 | 264.4509728 | 264.449048 | 264.429664 | 264.4357664 |
| 10/17/2013 11:40 | 0 | 264.4533192 | 264.4459728 | 264.449048 | 264.427664 | 264.4357664 |
| 10/17/2013 11:50 | 0 | 264.4514904 | 264.4439728 | 264.446048 | 264.428664 | 264.4337664 |
| 10/17/2013 12:00 | 0 | 264.4496616 | 264.4409728 | 264.444048 | 264.427664 | 264.4307664 |
| 10/17/2013 12:10 | 0 | 264.4484424 | 264.4419728 | 264.445048 | 264.426664 | 264.4317664 |
| 10/17/2013 12:20 | 0 | 264.447528  | 264.4369728 | 264.442048 | 264.428664 | 264.4287664 |
| 10/17/2013 12:30 | 0 | 264.447528  | 264.4369728 | 264.441048 | 264.428664 | 264.4297664 |
| 10/17/2013 12:40 | 0 | 264.4466136 | 264.4369728 | 264.441048 | 264.426664 | 264.4307664 |
| 10/17/2013 12:50 | 0 | 264.4453944 | 264.4369728 | 264.441048 | 264.429664 | 264.4287664 |
| 10/17/2013 13:00 | 0 | 264.4453944 | 264.4369728 | 264.437048 | 264.426664 | 264.4277664 |
| 10/17/2013 13:10 | 0 | 264.4450896 | 264.4369728 | 264.436048 | 264.427664 | 264.4277664 |
| 10/17/2013 13:20 | 0 | 264.44448   | 264.4359728 | 264.437048 | 264.426664 | 264.4297664 |
| 10/17/2013 13:30 | 0 | 264.4456992 | 264.4399728 | 264.439048 | 264.429664 | 264.4277664 |
| 10/17/2013 13:40 | 0 | 264.44448   | 264.4369728 | 264.437048 | 264.428664 | 264.4267664 |
| 10/17/2013 13:50 | 0 | 264.4432608 | 264.4329728 | 264.436048 | 264.426664 | 264.4267664 |
| 10/17/2013 14:00 | 0 | 264.442956  | 264.4329728 | 264.436048 | 264.426664 | 264.4237664 |
| 10/17/2013 14:10 | 0 | 264.4426512 | 264.4329728 | 264.435048 | 264.428664 | 264.4247664 |
| 10/17/2013 14:20 | 0 | 264.4426512 | 264.4379728 | 264.436048 | 264.426664 | 264.4267664 |
| 10/17/2013 14:30 | 0 | 264.441432  | 264.4339728 | 264.433048 | 264.426664 | 264.4247664 |
| 10/17/2013 14:40 | 0 | 264.4405176 | 264.4329728 | 264.433048 | 264.427664 | 264.4227664 |
| 10/17/2013 14:50 | 0 | 264.439908  | 264.4289728 | 264.433048 | 264.427664 | 264.4227664 |
| 10/17/2013 15:00 | 0 | 264.439908  | 264.4309728 | 264.432048 | 264.424664 | 264.4227664 |
| 10/17/2013 15:10 | 0 | 264.4405176 | 264.4359728 | 264.434048 | 264.429664 | 264.4237664 |

|                  |   |             |             |            |            |             |
|------------------|---|-------------|-------------|------------|------------|-------------|
| 10/17/2013 15:20 | 0 | 264.4386888 | 264.4309728 | 264.432048 | 264.426664 | 264.4207664 |
| 10/17/2013 15:30 | 0 | 264.4374696 | 264.4289728 | 264.432048 | 264.429664 | 264.4207664 |
| 10/17/2013 15:40 | 0 | 264.4374696 | 264.4299728 | 264.428048 | 264.427664 | 264.4207664 |
| 10/17/2013 15:50 | 0 | 264.4374696 | 264.4289728 | 264.428048 | 264.429664 | 264.4207664 |
| 10/17/2013 16:00 | 0 | 264.4365552 | 264.4279728 | 264.428048 | 264.429664 | 264.4197664 |
| 10/17/2013 16:10 | 0 | 264.43686   | 264.4309728 | 264.427048 | 264.429664 | 264.4187664 |
| 10/17/2013 16:20 | 0 | 264.4356408 | 264.4259728 | 264.426048 | 264.427664 | 264.4187664 |
| 10/17/2013 16:30 | 0 | 264.4347264 | 264.4249728 | 264.425048 | 264.427664 | 264.4177664 |
| 10/17/2013 16:40 | 0 | 264.4356408 | 264.4249728 | 264.427048 | 264.424664 | 264.4157664 |
| 10/17/2013 16:50 | 0 | 264.4359456 | 264.4259728 | 264.427048 | 264.427664 | 264.4177664 |
| 10/17/2013 17:00 | 0 | 264.4362504 | 264.4289728 | 264.427048 | 264.427664 | 264.4187664 |
| 10/17/2013 17:10 | 0 | 264.43686   | 264.4329728 | 264.424048 | 264.429664 | 264.4187664 |
| 10/17/2013 17:20 | 0 | 264.435336  | 264.4259728 | 264.426048 | 264.426664 | 264.4167664 |
| 10/17/2013 17:30 | 0 | 264.4347264 | 264.4279728 | 264.424048 | 264.426664 | 264.4157664 |
| 10/17/2013 17:40 | 0 | 264.433812  | 264.4249728 | 264.427048 | 264.428664 | 264.4167664 |
| 10/17/2013 17:50 | 0 | 264.4344216 | 264.4249728 | 264.427048 | 264.428664 | 264.4167664 |
| 10/17/2013 18:00 | 0 | 264.4350312 | 264.4289728 | 264.424048 | 264.425664 | 264.4167664 |
| 10/17/2013 18:10 | 0 | 264.4344216 | 264.4289728 | 264.424048 | 264.428664 | 264.4147664 |
| 10/17/2013 18:20 | 0 | 264.4341168 | 264.4239728 | 264.424048 | 264.427664 | 264.4157664 |
| 10/17/2013 18:30 | 0 | 264.4356408 | 264.4299728 | 264.427048 | 264.428664 | 264.4197664 |
| 10/17/2013 18:40 | 0 | 264.4356408 | 264.4289728 | 264.425048 | 264.427664 | 264.4177664 |
| 10/17/2013 18:50 | 0 | 264.435336  | 264.4289728 | 264.425048 | 264.427664 | 264.4187664 |
| 10/17/2013 19:00 | 0 | 264.4362504 | 264.4299728 | 264.425048 | 264.428664 | 264.4167664 |
| 10/17/2013 19:10 | 0 | 264.4365552 | 264.4279728 | 264.427048 | 264.427664 | 264.4187664 |
| 10/17/2013 19:20 | 0 | 264.4386888 | 264.4349728 | 264.425048 | 264.425664 | 264.4207664 |
| 10/17/2013 19:30 | 0 | 264.4396032 | 264.4349728 | 264.426048 | 264.426664 | 264.4207664 |
| 10/17/2013 19:40 | 0 | 264.4402128 | 264.4389728 | 264.428048 | 264.426664 | 264.4227664 |
| 10/17/2013 19:50 | 0 | 264.4405176 | 264.4389728 | 264.429048 | 264.428664 | 264.4217664 |
| 10/17/2013 20:00 | 0 | 264.4408224 | 264.4359728 | 264.430048 | 264.430664 | 264.4227664 |
| 10/17/2013 20:10 | 0 | 264.4417368 | 264.4379728 | 264.432048 | 264.427664 | 264.4207664 |
| 10/17/2013 20:20 | 0 | 264.4432608 | 264.4419728 | 264.432048 | 264.426664 | 264.4237664 |
| 10/17/2013 20:30 | 0 | 264.4435656 | 264.4399728 | 264.430048 | 264.425664 | 264.4227664 |
| 10/17/2013 20:40 | 0 | 264.4447848 | 264.4389728 | 264.434048 | 264.427664 | 264.4247664 |
| 10/17/2013 20:50 | 0 | 264.4472232 | 264.4489728 | 264.436048 | 264.429664 | 264.4267664 |
| 10/17/2013 21:00 | 0 | 264.4472232 | 264.4439728 | 264.437048 | 264.427664 | 264.4267664 |
| 10/17/2013 21:10 | 0 | 264.4499664 | 264.4499728 | 264.439048 | 264.427664 | 264.4297664 |
| 10/17/2013 21:20 | 0 | 264.4502712 | 264.4459728 | 264.437048 | 264.425664 | 264.4277664 |
| 10/17/2013 21:30 | 0 | 264.450576  | 264.4459728 | 264.441048 | 264.428664 | 264.4277664 |
| 10/17/2013 21:40 | 0 | 264.4521    | 264.4509728 | 264.441048 | 264.427664 | 264.4297664 |
| 10/17/2013 21:50 | 0 | 264.4530144 | 264.4519728 | 264.443048 | 264.427664 | 264.4317664 |
| 10/17/2013 22:00 | 0 | 264.4524048 | 264.4519728 | 264.443048 | 264.429664 | 264.4317664 |
| 10/17/2013 22:10 | 0 | 264.4554528 | 264.4579728 | 264.446048 | 264.429664 | 264.4347664 |
| 10/17/2013 22:20 | 0 | 264.4548432 | 264.4519728 | 264.446048 | 264.429664 | 264.4337664 |
| 10/17/2013 22:30 | 0 | 264.4554528 | 264.4549728 | 264.446048 | 264.428664 | 264.4317664 |
| 10/17/2013 22:40 | 0 | 264.4545384 | 264.4499728 | 264.446048 | 264.426664 | 264.4327664 |
| 10/17/2013 22:50 | 0 | 264.455148  | 264.4519728 | 264.447048 | 264.428664 | 264.4357664 |
| 10/17/2013 23:00 | 0 | 264.4554528 | 264.4519728 | 264.449048 | 264.428664 | 264.4337664 |

|                  |   |             |             |            |            |             |
|------------------|---|-------------|-------------|------------|------------|-------------|
| 10/17/2013 23:10 | 0 | 264.4527096 | 264.4459728 | 264.448048 | 264.429664 | 264.4307664 |
| 10/17/2013 23:20 | 0 | 264.453624  | 264.4479728 | 264.447048 | 264.429664 | 264.4347664 |
| 10/17/2013 23:30 | 0 | 264.4511856 | 264.4429728 | 264.447048 | 264.428664 | 264.4317664 |
| 10/17/2013 23:40 | 0 | 264.4514904 | 264.4479728 | 264.444048 | 264.428664 | 264.4317664 |
| 10/17/2013 23:50 | 0 | 264.4487472 | 264.4389728 | 264.444048 | 264.428664 | 264.4297664 |
| 10/18/2013 0:00  | 0 | 264.4487472 | 264.4369728 | 264.441048 | 264.427664 | 264.4277664 |
| 10/18/2013 0:10  | 0 | 264.4466136 | 264.4389728 | 264.440048 | 264.427664 | 264.4277664 |
| 10/18/2013 0:20  | 0 | 264.44448   | 264.4289728 | 264.439048 | 264.426664 | 264.4257664 |
| 10/18/2013 0:30  | 0 | 264.4447848 | 264.4339728 | 264.437048 | 264.427664 | 264.4277664 |
| 10/18/2013 0:40  | 0 | 264.4417368 | 264.4279728 | 264.435048 | 264.426664 | 264.4257664 |
| 10/18/2013 0:50  | 0 | 264.4396032 | 264.4209728 | 264.435048 | 264.425664 | 264.4227664 |
| 10/18/2013 1:00  | 0 | 264.4392984 | 264.4259728 | 264.431048 | 264.426664 | 264.4247664 |
| 10/18/2013 1:10  | 0 | 264.43686   | 264.4249728 | 264.429048 | 264.426664 | 264.4207664 |
| 10/18/2013 1:20  | 0 | 264.4335072 | 264.4159728 | 264.428048 | 264.429664 | 264.4187664 |
| 10/18/2013 1:30  | 0 | 264.4316784 | 264.4129728 | 264.425048 | 264.426664 | 264.4177664 |
| 10/18/2013 1:40  | 0 | 264.4319832 | 264.4209728 | 264.424048 | 264.427664 | 264.4207664 |
| 10/18/2013 1:50  | 0 | 264.4301544 | 264.4179728 | 264.421048 | 264.427664 | 264.4177664 |
| 10/18/2013 2:00  | 0 | 264.427716  | 264.4099728 | 264.417048 | 264.424664 | 264.4147664 |
| 10/18/2013 2:10  | 0 | 264.4255824 | 264.4089728 | 264.417048 | 264.426664 | 264.4147664 |
| 10/18/2013 2:20  | 0 | 264.4234488 | 264.4009728 | 264.416048 | 264.426664 | 264.4127664 |
| 10/18/2013 2:30  | 0 | 264.4219248 | 264.4049728 | 264.413048 | 264.426664 | 264.4117664 |
| 10/18/2013 2:40  | 0 | 264.420096  | 264.4009728 | 264.411048 | 264.426664 | 264.4097664 |
| 10/18/2013 2:50  | 0 | 264.4197912 | 264.4029728 | 264.406048 | 264.425664 | 264.4107664 |
| 10/18/2013 3:00  | 0 | 264.4173528 | 264.4009728 | 264.406048 | 264.426664 | 264.4087664 |
| 10/18/2013 3:10  | 0 | 264.4161336 | 264.3979728 | 264.405048 | 264.423664 | 264.4067664 |
| 10/18/2013 3:20  | 0 | 264.4146096 | 264.3959728 | 264.404048 | 264.423664 | 264.4067664 |
| 10/18/2013 3:30  | 0 | 264.4133904 | 264.3959728 | 264.400048 | 264.423664 | 264.4047664 |
| 10/18/2013 3:40  | 0 | 264.4127808 | 264.3959728 | 264.400048 | 264.425664 | 264.4067664 |
| 10/18/2013 3:50  | 0 | 264.4118664 | 264.3959728 | 264.398048 | 264.423664 | 264.4047664 |
| 10/18/2013 4:00  | 0 | 264.4112568 | 264.3929728 | 264.397048 | 264.423664 | 264.4037664 |
| 10/18/2013 4:10  | 0 | 264.4103424 | 264.3909728 | 264.396048 | 264.425664 | 264.3997664 |
| 10/18/2013 4:20  | 0 | 264.409428  | 264.3899728 | 264.394048 | 264.422664 | 264.4007664 |
| 10/18/2013 4:30  | 0 | 264.4097328 | 264.3929728 | 264.393048 | 264.420664 | 264.4017664 |
| 10/18/2013 4:40  | 0 | 264.4088184 | 264.3939728 | 264.394048 | 264.421664 | 264.4027664 |
| 10/18/2013 4:50  | 0 | 264.4082088 | 264.3929728 | 264.393048 | 264.424664 | 264.4007664 |
| 10/18/2013 5:00  | 0 | 264.4085136 | 264.3899728 | 264.390048 | 264.418664 | 264.3987664 |
| 10/18/2013 5:10  | 0 | 264.4082088 | 264.3919728 | 264.390048 | 264.421664 | 264.3987664 |
| 10/18/2013 5:20  | 0 | 264.407904  | 264.3919728 | 264.392048 | 264.421664 | 264.3987664 |
| 10/18/2013 5:30  | 0 | 264.4072944 | 264.3919728 | 264.390048 | 264.420664 | 264.3977664 |
| 10/18/2013 5:40  | 0 | 264.4066848 | 264.3919728 | 264.389048 | 264.420664 | 264.3997664 |
| 10/18/2013 5:50  | 0 | 264.4057704 | 264.3909728 | 264.389048 | 264.420664 | 264.3977664 |
| 10/18/2013 6:00  | 0 | 264.4054656 | 264.3879728 | 264.387048 | 264.417664 | 264.3947664 |
| 10/18/2013 6:10  | 0 | 264.4051608 | 264.3889728 | 264.387048 | 264.419664 | 264.3967664 |
| 10/18/2013 6:20  | 0 | 264.4051608 | 264.3879728 | 264.386048 | 264.417664 | 264.3947664 |
| 10/18/2013 6:30  | 0 | 264.4051608 | 264.3889728 | 264.387048 | 264.417664 | 264.3947664 |
| 10/18/2013 6:40  | 0 | 264.4054656 | 264.3919728 | 264.388048 | 264.419664 | 264.3967664 |
| 10/18/2013 6:50  | 0 | 264.40638   | 264.3939728 | 264.389048 | 264.417664 | 264.3957664 |

|                  |   |             |             |            |            |             |
|------------------|---|-------------|-------------|------------|------------|-------------|
| 10/18/2013 7:00  | 0 | 264.4072944 | 264.3949728 | 264.389048 | 264.417664 | 264.3957664 |
| 10/18/2013 7:10  | 0 | 264.4088184 | 264.3989728 | 264.390048 | 264.417664 | 264.3997664 |
| 10/18/2013 7:20  | 0 | 264.4100376 | 264.3999728 | 264.390048 | 264.415664 | 264.3977664 |
| 10/18/2013 7:30  | 0 | 264.4146096 | 264.4089728 | 264.390048 | 264.412664 | 264.3977664 |
| 10/18/2013 7:40  | 0 | 264.4161336 | 264.4079728 | 264.394048 | 264.417664 | 264.4027664 |
| 10/18/2013 7:50  | 0 | 264.4191816 | 264.4139728 | 264.397048 | 264.414664 | 264.4017664 |
| 10/18/2013 8:00  | 0 | 264.4213152 | 264.4139728 | 264.399048 | 264.414664 | 264.4037664 |
| 10/18/2013 8:10  | 0 | 264.4249728 | 264.4239728 | 264.402048 | 264.415664 | 264.4067664 |
| 10/18/2013 8:20  | 0 | 264.4274112 | 264.4279728 | 264.407048 | 264.415664 | 264.4097664 |
| 10/18/2013 8:30  | 0 | 264.4316784 | 264.4339728 | 264.411048 | 264.415664 | 264.4117664 |
| 10/18/2013 8:40  | 0 | 264.435336  | 264.4379728 | 264.415048 | 264.413664 | 264.4167664 |
| 10/18/2013 8:50  | 0 | 264.438384  | 264.4429728 | 264.420048 | 264.415664 | 264.4167664 |
| 10/18/2013 9:00  | 0 | 264.4420416 | 264.4479728 | 264.425048 | 264.412664 | 264.4207664 |
| 10/18/2013 9:10  | 0 | 264.44448   | 264.4509728 | 264.428048 | 264.414664 | 264.4207664 |
| 10/18/2013 9:20  | 0 | 264.4456992 | 264.4459728 | 264.432048 | 264.416664 | 264.4227664 |
| 10/18/2013 9:30  | 0 | 264.4481376 | 264.4519728 | 264.434048 | 264.415664 | 264.4227664 |
| 10/18/2013 9:40  | 0 | 264.450576  | 264.4559728 | 264.439048 | 264.416664 | 264.4277664 |
| 10/18/2013 9:50  | 0 | 264.4511856 | 264.4519728 | 264.441048 | 264.417664 | 264.4297664 |
| 10/18/2013 10:00 | 0 | 264.4524048 | 264.4549728 | 264.445048 | 264.418664 | 264.4317664 |
| 10/18/2013 10:10 | 0 | 264.4533192 | 264.4569728 | 264.445048 | 264.417664 | 264.4317664 |
| 10/18/2013 10:20 | 0 | 264.4514904 | 264.4479728 | 264.445048 | 264.415664 | 264.4297664 |
| 10/18/2013 10:30 | 0 | 264.4511856 | 264.4499728 | 264.446048 | 264.420664 | 264.4297664 |
| 10/18/2013 10:40 | 0 | 264.450576  | 264.4479728 | 264.445048 | 264.417664 | 264.4277664 |
| 10/18/2013 10:50 | 0 | 264.4514904 | 264.4479728 | 264.446048 | 264.415664 | 264.4317664 |
| 10/18/2013 11:00 | 0 | 264.4511856 | 264.4519728 | 264.446048 | 264.416664 | 264.4317664 |
| 10/18/2013 11:10 | 0 | 264.4517952 | 264.4479728 | 264.446048 | 264.417664 | 264.4317664 |
| 10/18/2013 11:20 | 0 | 264.4511856 | 264.4469728 | 264.446048 | 264.417664 | 264.4297664 |
| 10/18/2013 11:30 | 0 | 264.450576  | 264.4419728 | 264.445048 | 264.415664 | 264.4287664 |
| 10/18/2013 11:40 | 0 | 264.4511856 | 264.4479728 | 264.445048 | 264.418664 | 264.4297664 |
| 10/18/2013 11:50 | 0 | 264.4514904 | 264.4449728 | 264.443048 | 264.417664 | 264.4297664 |
| 10/18/2013 12:00 | 0 | 264.4499664 | 264.4409728 | 264.443048 | 264.417664 | 264.4287664 |
| 10/18/2013 12:10 | 0 | 264.4484424 | 264.4419728 | 264.442048 | 264.417664 | 264.4287664 |
| 10/18/2013 12:20 | 0 | 264.4466136 | 264.4349728 | 264.442048 | 264.417664 | 264.4267664 |
| 10/18/2013 12:30 | 0 | 264.4463088 | 264.4399728 | 264.442048 | 264.418664 | 264.4287664 |
| 10/18/2013 12:40 | 0 | 264.4441752 | 264.4359728 | 264.440048 | 264.415664 | 264.4287664 |
| 10/18/2013 12:50 | 0 | 264.4438704 | 264.4339728 | 264.440048 | 264.417664 | 264.4267664 |
| 10/18/2013 13:00 | 0 | 264.4432608 | 264.4379728 | 264.437048 | 264.417664 | 264.4267664 |
| 10/18/2013 13:10 | 0 | 264.4423464 | 264.4359728 | 264.437048 | 264.418664 | 264.4267664 |
| 10/18/2013 13:20 | 0 | 264.4432608 | 264.4379728 | 264.436048 | 264.417664 | 264.4247664 |
| 10/18/2013 13:30 | 0 | 264.441432  | 264.4309728 | 264.434048 | 264.416664 | 264.4227664 |
| 10/18/2013 13:40 | 0 | 264.4426512 | 264.4399728 | 264.436048 | 264.419664 | 264.4237664 |
| 10/18/2013 13:50 | 0 | 264.441432  | 264.4349728 | 264.436048 | 264.416664 | 264.4227664 |
| 10/18/2013 14:00 | 0 | 264.4420416 | 264.4369728 | 264.434048 | 264.417664 | 264.4237664 |
| 10/18/2013 14:10 | 0 | 264.441432  | 264.4369728 | 264.434048 | 264.417664 | 264.4237664 |
| 10/18/2013 14:20 | 0 | 264.4408224 | 264.4319728 | 264.433048 | 264.417664 | 264.4217664 |
| 10/18/2013 14:30 | 0 | 264.441432  | 264.4329728 | 264.430048 | 264.417664 | 264.4217664 |
| 10/18/2013 14:40 | 0 | 264.4392984 | 264.4329728 | 264.432048 | 264.416664 | 264.4217664 |

|                  |   |             |             |            |            |             |
|------------------|---|-------------|-------------|------------|------------|-------------|
| 10/18/2013 14:50 | 0 | 264.4402128 | 264.4329728 | 264.432048 | 264.418664 | 264.4227664 |
| 10/18/2013 15:00 | 0 | 264.4396032 | 264.4359728 | 264.431048 | 264.419664 | 264.4227664 |
| 10/18/2013 15:10 | 0 | 264.439908  | 264.4309728 | 264.429048 | 264.416664 | 264.4207664 |
| 10/18/2013 15:20 | 0 | 264.439908  | 264.4359728 | 264.432048 | 264.417664 | 264.4207664 |
| 10/18/2013 15:30 | 0 | 264.438384  | 264.4279728 | 264.429048 | 264.419664 | 264.4197664 |
| 10/18/2013 15:40 | 0 | 264.4389936 | 264.4319728 | 264.429048 | 264.416664 | 264.4207664 |
| 10/18/2013 15:50 | 0 | 264.4371648 | 264.4289728 | 264.431048 | 264.417664 | 264.4187664 |
| 10/18/2013 16:00 | 0 | 264.4362504 | 264.4259728 | 264.429048 | 264.419664 | 264.4187664 |
| 10/18/2013 16:10 | 0 | 264.4362504 | 264.4309728 | 264.428048 | 264.417664 | 264.4177664 |
| 10/18/2013 16:20 | 0 | 264.4350312 | 264.4229728 | 264.425048 | 264.416664 | 264.4147664 |
| 10/18/2013 16:30 | 0 | 264.435336  | 264.4259728 | 264.428048 | 264.417664 | 264.4167664 |
| 10/18/2013 16:40 | 0 | 264.433812  | 264.4269728 | 264.427048 | 264.419664 | 264.4167664 |
| 10/18/2013 16:50 | 0 | 264.4332024 | 264.4219728 | 264.425048 | 264.419664 | 264.4167664 |
| 10/18/2013 17:00 | 0 | 264.4341168 | 264.4299728 | 264.425048 | 264.420664 | 264.4187664 |
| 10/18/2013 17:10 | 0 | 264.4319832 | 264.4239728 | 264.424048 | 264.419664 | 264.4157664 |
| 10/18/2013 17:20 | 0 | 264.4319832 | 264.4239728 | 264.423048 | 264.419664 | 264.4167664 |
| 10/18/2013 17:30 | 0 | 264.4313736 | 264.4219728 | 264.424048 | 264.419664 | 264.4157664 |
| 10/18/2013 17:40 | 0 | 264.4332024 | 264.4299728 | 264.424048 | 264.419664 | 264.4167664 |
| 10/18/2013 17:50 | 0 | 264.4316784 | 264.4229728 | 264.421048 | 264.417664 | 264.4137664 |
| 10/18/2013 18:00 | 0 | 264.4347264 | 264.4299728 | 264.423048 | 264.415664 | 264.4167664 |
| 10/18/2013 18:10 | 0 | 264.4344216 | 264.4269728 | 264.422048 | 264.415664 | 264.4147664 |
| 10/18/2013 18:20 | 0 | 264.4359456 | 264.4289728 | 264.424048 | 264.420664 | 264.4177664 |
| 10/18/2013 18:30 | 0 | 264.4356408 | 264.4299728 | 264.426048 | 264.417664 | 264.4187664 |
| 10/18/2013 18:40 | 0 | 264.4362504 | 264.4269728 | 264.424048 | 264.417664 | 264.4157664 |
| 10/18/2013 18:50 | 0 | 264.4377744 | 264.4349728 | 264.426048 | 264.418664 | 264.4197664 |
| 10/18/2013 19:00 | 0 | 264.4362504 | 264.4259728 | 264.426048 | 264.417664 | 264.4167664 |
| 10/18/2013 19:10 | 0 | 264.4374696 | 264.4299728 | 264.427048 | 264.420664 | 264.4197664 |
| 10/18/2013 19:20 | 0 | 264.4362504 | 264.4289728 | 264.426048 | 264.419664 | 264.4187664 |
| 10/18/2013 19:30 | 0 | 264.4359456 | 264.4259728 | 264.427048 | 264.419664 | 264.4187664 |
| 10/18/2013 19:40 | 0 | 264.4371648 | 264.4369728 | 264.428048 | 264.418664 | 264.4197664 |
| 10/18/2013 19:50 | 0 | 264.4374696 | 264.4319728 | 264.427048 | 264.418664 | 264.4197664 |
| 10/18/2013 20:00 | 0 | 264.4392984 | 264.4379728 | 264.430048 | 264.420664 | 264.4217664 |
| 10/18/2013 20:10 | 0 | 264.439908  | 264.4349728 | 264.431048 | 264.420664 | 264.4217664 |
| 10/18/2013 20:20 | 0 | 264.439908  | 264.4379728 | 264.431048 | 264.420664 | 264.4227664 |
| 10/18/2013 20:30 | 0 | 264.4411272 | 264.4399728 | 264.431048 | 264.419664 | 264.4227664 |
| 10/18/2013 20:40 | 0 | 264.439908  | 264.4349728 | 264.430048 | 264.418664 | 264.4217664 |
| 10/18/2013 20:50 | 0 | 264.4417368 | 264.4399728 | 264.431048 | 264.422664 | 264.4227664 |
| 10/18/2013 21:00 | 0 | 264.4405176 | 264.4319728 | 264.432048 | 264.420664 | 264.4197664 |
| 10/18/2013 21:10 | 0 | 264.4411272 | 264.4399728 | 264.432048 | 264.421664 | 264.4227664 |
| 10/18/2013 21:20 | 0 | 264.4417368 | 264.4389728 | 264.434048 | 264.421664 | 264.4257664 |
| 10/18/2013 21:30 | 0 | 264.4417368 | 264.4399728 | 264.432048 | 264.421664 | 264.4247664 |
| 10/18/2013 21:40 | 0 | 264.4411272 | 264.4359728 | 264.432048 | 264.419664 | 264.4227664 |
| 10/18/2013 21:50 | 0 | 264.441432  | 264.4389728 | 264.435048 | 264.422664 | 264.4227664 |
| 10/18/2013 22:00 | 0 | 264.4420416 | 264.4399728 | 264.435048 | 264.419664 | 264.4247664 |
| 10/18/2013 22:10 | 0 | 264.441432  | 264.4329728 | 264.432048 | 264.416664 | 264.4217664 |
| 10/18/2013 22:20 | 0 | 264.4423464 | 264.4359728 | 264.432048 | 264.419664 | 264.4227664 |
| 10/18/2013 22:30 | 0 | 264.441432  | 264.4329728 | 264.432048 | 264.418664 | 264.4227664 |

|                  |   |             |             |            |            |             |
|------------------|---|-------------|-------------|------------|------------|-------------|
| 10/18/2013 22:40 | 0 | 264.4411272 | 264.4359728 | 264.432048 | 264.419664 | 264.4227664 |
| 10/18/2013 22:50 | 0 | 264.439908  | 264.4289728 | 264.432048 | 264.419664 | 264.4227664 |
| 10/18/2013 23:00 | 0 | 264.4396032 | 264.4309728 | 264.431048 | 264.419664 | 264.4227664 |
| 10/18/2013 23:10 | 0 | 264.4380792 | 264.4299728 | 264.428048 | 264.416664 | 264.4197664 |
| 10/18/2013 23:20 | 0 | 264.4380792 | 264.4289728 | 264.430048 | 264.419664 | 264.4207664 |
| 10/18/2013 23:30 | 0 | 264.4362504 | 264.4279728 | 264.426048 | 264.417664 | 264.4187664 |
| 10/18/2013 23:40 | 0 | 264.4362504 | 264.4259728 | 264.427048 | 264.417664 | 264.4197664 |
| 10/18/2013 23:50 | 0 | 264.4347264 | 264.4269728 | 264.426048 | 264.418664 | 264.4197664 |
| 10/19/2013 0:00  | 0 | 264.4332024 | 264.4199728 | 264.427048 | 264.421664 | 264.4197664 |
| 10/19/2013 0:10  | 0 | 264.4341168 | 264.4269728 | 264.423048 | 264.417664 | 264.4177664 |
| 10/19/2013 0:20  | 0 | 264.4310688 | 264.4149728 | 264.423048 | 264.419664 | 264.4157664 |
| 10/19/2013 0:30  | 0 | 264.4319832 | 264.4259728 | 264.423048 | 264.418664 | 264.4167664 |
| 10/19/2013 0:40  | 0 | 264.4289352 | 264.4159728 | 264.422048 | 264.420664 | 264.4137664 |
| 10/19/2013 0:50  | 0 | 264.4304592 | 264.4209728 | 264.420048 | 264.414664 | 264.4167664 |
| 10/19/2013 1:00  | 0 | 264.427716  | 264.4129728 | 264.418048 | 264.416664 | 264.4137664 |
| 10/19/2013 1:10  | 0 | 264.427716  | 264.4169728 | 264.418048 | 264.415664 | 264.4147664 |
| 10/19/2013 1:20  | 0 | 264.4268016 | 264.4159728 | 264.417048 | 264.416664 | 264.4147664 |
| 10/19/2013 1:30  | 0 | 264.4249728 | 264.4109728 | 264.413048 | 264.414664 | 264.4117664 |
| 10/19/2013 1:40  | 0 | 264.4228392 | 264.4079728 | 264.412048 | 264.417664 | 264.4107664 |
| 10/19/2013 1:50  | 0 | 264.42162   | 264.4059728 | 264.413048 | 264.421664 | 264.4107664 |
| 10/19/2013 2:00  | 0 | 264.4204008 | 264.4059728 | 264.412048 | 264.419664 | 264.4107664 |
| 10/19/2013 2:10  | 0 | 264.420096  | 264.4059728 | 264.410048 | 264.417664 | 264.4087664 |
| 10/19/2013 2:20  | 0 | 264.4194864 | 264.4109728 | 264.408048 | 264.419664 | 264.4077664 |
| 10/19/2013 2:30  | 0 | 264.4182672 | 264.4059728 | 264.408048 | 264.416664 | 264.4057664 |
| 10/19/2013 2:40  | 0 | 264.4158288 | 264.4009728 | 264.406048 | 264.417664 | 264.4037664 |
| 10/19/2013 2:50  | 0 | 264.415524  | 264.3989728 | 264.402048 | 264.415664 | 264.4037664 |
| 10/19/2013 3:00  | 0 | 264.4143048 | 264.3969728 | 264.402048 | 264.414664 | 264.4037664 |
| 10/19/2013 3:10  | 0 | 264.4127808 | 264.3989728 | 264.404048 | 264.418664 | 264.4037664 |
| 10/19/2013 3:20  | 0 | 264.4121712 | 264.3979728 | 264.403048 | 264.417664 | 264.4027664 |
| 10/19/2013 3:30  | 0 | 264.4103424 | 264.3939728 | 264.397048 | 264.416664 | 264.3977664 |
| 10/19/2013 3:40  | 0 | 264.4097328 | 264.3979728 | 264.400048 | 264.417664 | 264.3997664 |
| 10/19/2013 3:50  | 0 | 264.4091232 | 264.3959728 | 264.399048 | 264.418664 | 264.4007664 |
| 10/19/2013 4:00  | 0 | 264.409428  | 264.3969728 | 264.397048 | 264.415664 | 264.3997664 |
| 10/19/2013 4:10  | 0 | 264.4075992 | 264.3929728 | 264.395048 | 264.415664 | 264.3987664 |
| 10/19/2013 4:20  | 0 | 264.4066848 | 264.3929728 | 264.395048 | 264.416664 | 264.3987664 |
| 10/19/2013 4:30  | 0 | 264.4060752 | 264.3929728 | 264.393048 | 264.416664 | 264.3967664 |
| 10/19/2013 4:40  | 0 | 264.4051608 | 264.3909728 | 264.393048 | 264.414664 | 264.3947664 |
| 10/19/2013 4:50  | 0 | 264.4051608 | 264.3909728 | 264.393048 | 264.412664 | 264.3947664 |
| 10/19/2013 5:00  | 0 | 264.4051608 | 264.3909728 | 264.391048 | 264.411664 | 264.3947664 |
| 10/19/2013 5:10  | 0 | 264.4042464 | 264.3889728 | 264.389048 | 264.412664 | 264.3967664 |
| 10/19/2013 5:20  | 0 | 264.4045512 | 264.3939728 | 264.393048 | 264.413664 | 264.3977664 |
| 10/19/2013 5:30  | 0 | 264.4039416 | 264.3909728 | 264.391048 | 264.414664 | 264.3967664 |
| 10/19/2013 5:40  | 0 | 264.4039416 | 264.3889728 | 264.388048 | 264.412664 | 264.3937664 |
| 10/19/2013 5:50  | 0 | 264.4036368 | 264.3909728 | 264.389048 | 264.414664 | 264.3947664 |
| 10/19/2013 6:00  | 0 | 264.4036368 | 264.3889728 | 264.389048 | 264.413664 | 264.3947664 |
| 10/19/2013 6:10  | 0 | 264.403332  | 264.3889728 | 264.389048 | 264.413664 | 264.3937664 |
| 10/19/2013 6:20  | 0 | 264.4036368 | 264.3919728 | 264.388048 | 264.410664 | 264.3937664 |



|                  |   |             |             |            |            |             |
|------------------|---|-------------|-------------|------------|------------|-------------|
| 10/19/2013 6:30  | 0 | 264.4036368 | 264.3939728 | 264.388048 | 264.412664 | 264.3937664 |
| 10/19/2013 6:40  | 0 | 264.403332  | 264.3919728 | 264.388048 | 264.413664 | 264.3937664 |
| 10/19/2013 6:50  | 0 | 264.4045512 | 264.3939728 | 264.389048 | 264.412664 | 264.3937664 |
| 10/19/2013 7:00  | 0 | 264.403332  | 264.3909728 | 264.388048 | 264.410664 | 264.3947664 |
| 10/19/2013 7:10  | 0 | 264.4045512 | 264.3919728 | 264.388048 | 264.412664 | 264.3927664 |
| 10/19/2013 7:20  | 0 | 264.4042464 | 264.3949728 | 264.391048 | 264.413664 | 264.3957664 |
| 10/19/2013 7:30  | 0 | 264.4045512 | 264.3919728 | 264.387048 | 264.412664 | 264.3927664 |
| 10/19/2013 7:40  | 0 | 264.4045512 | 264.3939728 | 264.388048 | 264.412664 | 264.3937664 |
| 10/19/2013 7:50  | 0 | 264.4057704 | 264.3969728 | 264.388048 | 264.410664 | 264.3957664 |
| 10/19/2013 8:00  | 0 | 264.4072944 | 264.3999728 | 264.392048 | 264.413664 | 264.3967664 |
| 10/19/2013 8:10  | 0 | 264.409428  | 264.4029728 | 264.393048 | 264.409664 | 264.3987664 |
| 10/19/2013 8:20  | 0 | 264.4130856 | 264.4079728 | 264.396048 | 264.409664 | 264.3987664 |
| 10/19/2013 8:30  | 0 | 264.4149144 | 264.4079728 | 264.396048 | 264.409664 | 264.4007664 |
| 10/19/2013 8:40  | 0 | 264.4161336 | 264.4149728 | 264.398048 | 264.411664 | 264.4017664 |
| 10/19/2013 8:50  | 0 | 264.4173528 | 264.4129728 | 264.400048 | 264.409664 | 264.4027664 |
| 10/19/2013 9:00  | 0 | 264.4194864 | 264.4179728 | 264.401048 | 264.409664 | 264.4037664 |
| 10/19/2013 9:10  | 0 | 264.4213152 | 264.4189728 | 264.402048 | 264.409664 | 264.4057664 |
| 10/19/2013 9:20  | 0 | 264.4234488 | 264.4219728 | 264.406048 | 264.409664 | 264.4047664 |
| 10/19/2013 9:30  | 0 | 264.4252776 | 264.4259728 | 264.407048 | 264.407664 | 264.4067664 |
| 10/19/2013 9:40  | 0 | 264.4271064 | 264.4269728 | 264.410048 | 264.408664 | 264.4077664 |
| 10/19/2013 9:50  | 0 | 264.4301544 | 264.4349728 | 264.414048 | 264.410664 | 264.4097664 |
| 10/19/2013 10:00 | 0 | 264.432288  | 264.4369728 | 264.418048 | 264.410664 | 264.4107664 |
| 10/19/2013 10:10 | 0 | 264.4344216 | 264.4379728 | 264.421048 | 264.411664 | 264.4177664 |
| 10/19/2013 10:20 | 0 | 264.4371648 | 264.4449728 | 264.426048 | 264.411664 | 264.4197664 |
| 10/19/2013 10:30 | 0 | 264.439908  | 264.4489728 | 264.426048 | 264.409664 | 264.4207664 |
| 10/19/2013 10:40 | 0 | 264.4426512 | 264.4539728 | 264.430048 | 264.409664 | 264.4227664 |
| 10/19/2013 10:50 | 0 | 264.4450896 | 264.4529728 | 264.433048 | 264.407664 | 264.4227664 |
| 10/19/2013 11:00 | 0 | 264.4463088 | 264.4529728 | 264.436048 | 264.407664 | 264.4227664 |
| 10/19/2013 11:10 | 0 | 264.449052  | 264.4599728 | 264.440048 | 264.410664 | 264.4267664 |
| 10/19/2013 11:20 | 0 | 264.4508808 | 264.4609728 | 264.443048 | 264.409664 | 264.4277664 |
| 10/19/2013 11:30 | 0 | 264.4533192 | 264.4569728 | 264.444048 | 264.410664 | 264.4287664 |
| 10/19/2013 11:40 | 0 | 264.4557576 | 264.4699728 | 264.448048 | 264.410664 | 264.4317664 |
| 10/19/2013 11:50 | 0 | 264.4563672 | 264.4609728 | 264.451048 | 264.411664 | 264.4317664 |
| 10/19/2013 12:00 | 0 | 264.4572816 | 264.4589728 | 264.453048 | 264.409664 | 264.4327664 |
| 10/19/2013 12:10 | 0 | 264.456672  | 264.4629728 | 264.452048 | 264.411664 | 264.4327664 |
| 10/19/2013 12:20 | 0 | 264.4606344 | 264.4709728 | 264.455048 | 264.411664 | 264.4347664 |
| 10/19/2013 12:30 | 0 | 264.4615488 | 264.4659728 | 264.458048 | 264.412664 | 264.4347664 |
| 10/19/2013 12:40 | 0 | 264.4624632 | 264.4689728 | 264.460048 | 264.412664 | 264.4377664 |
| 10/19/2013 12:50 | 0 | 264.462768  | 264.4669728 | 264.459048 | 264.411664 | 264.4367664 |
| 10/19/2013 13:00 | 0 | 264.462768  | 264.4649728 | 264.460048 | 264.414664 | 264.4367664 |
| 10/19/2013 13:10 | 0 | 264.4624632 | 264.4659728 | 264.459048 | 264.414664 | 264.4397664 |
| 10/19/2013 13:20 | 0 | 264.4609392 | 264.4609728 | 264.459048 | 264.413664 | 264.4337664 |
| 10/19/2013 13:30 | 0 | 264.4609392 | 264.4629728 | 264.461048 | 264.415664 | 264.4377664 |
| 10/19/2013 13:40 | 0 | 264.4606344 | 264.4639728 | 264.458048 | 264.413664 | 264.4357664 |
| 10/19/2013 13:50 | 0 | 264.4603296 | 264.4619728 | 264.458048 | 264.414664 | 264.4367664 |
| 10/19/2013 14:00 | 0 | 264.4600248 | 264.4609728 | 264.457048 | 264.414664 | 264.4367664 |
| 10/19/2013 14:10 | 0 | 264.4591104 | 264.4589728 | 264.456048 | 264.413664 | 264.4347664 |

|                  |   |             |             |            |            |             |
|------------------|---|-------------|-------------|------------|------------|-------------|
| 10/19/2013 14:20 | 0 | 264.4588056 | 264.4569728 | 264.457048 | 264.412664 | 264.4337664 |
| 10/19/2013 14:30 | 0 | 264.458196  | 264.4559728 | 264.454048 | 264.412664 | 264.4337664 |
| 10/19/2013 14:40 | 0 | 264.4572816 | 264.4549728 | 264.455048 | 264.415664 | 264.4327664 |
| 10/19/2013 14:50 | 0 | 264.4560624 | 264.4519728 | 264.453048 | 264.413664 | 264.4307664 |
| 10/19/2013 15:00 | 0 | 264.455148  | 264.4499728 | 264.450048 | 264.414664 | 264.4317664 |
| 10/19/2013 15:10 | 0 | 264.4548432 | 264.4499728 | 264.450048 | 264.414664 | 264.4317664 |
| 10/19/2013 15:20 | 0 | 264.4545384 | 264.4509728 | 264.447048 | 264.411664 | 264.4297664 |
| 10/19/2013 15:30 | 0 | 264.4539288 | 264.4489728 | 264.450048 | 264.412664 | 264.4297664 |
| 10/19/2013 15:40 | 0 | 264.453624  | 264.4489728 | 264.449048 | 264.414664 | 264.4297664 |
| 10/19/2013 15:50 | 0 | 264.4530144 | 264.4469728 | 264.446048 | 264.412664 | 264.4277664 |
| 10/19/2013 16:00 | 0 | 264.4524048 | 264.4469728 | 264.450048 | 264.414664 | 264.4297664 |
| 10/19/2013 16:10 | 0 | 264.4514904 | 264.4469728 | 264.447048 | 264.414664 | 264.4297664 |
| 10/19/2013 16:20 | 0 | 264.450576  | 264.4489728 | 264.450048 | 264.417664 | 264.4307664 |
| 10/19/2013 16:30 | 0 | 264.4496616 | 264.4439728 | 264.445048 | 264.415664 | 264.4267664 |
| 10/19/2013 16:40 | 0 | 264.4484424 | 264.4419728 | 264.445048 | 264.413664 | 264.4257664 |
| 10/19/2013 16:50 | 0 | 264.4481376 | 264.4419728 | 264.446048 | 264.415664 | 264.4287664 |
| 10/19/2013 17:00 | 0 | 264.4478328 | 264.4419728 | 264.442048 | 264.412664 | 264.4257664 |
| 10/19/2013 17:10 | 0 | 264.4469184 | 264.4389728 | 264.442048 | 264.414664 | 264.4247664 |
| 10/19/2013 17:20 | 0 | 264.4466136 | 264.4399728 | 264.441048 | 264.416664 | 264.4257664 |
| 10/19/2013 17:30 | 0 | 264.4456992 | 264.4429728 | 264.443048 | 264.419664 | 264.4257664 |
| 10/19/2013 17:40 | 0 | 264.4456992 | 264.4399728 | 264.441048 | 264.415664 | 264.4257664 |
| 10/19/2013 17:50 | 0 | 264.4456992 | 264.4369728 | 264.438048 | 264.413664 | 264.4207664 |
| 10/19/2013 18:00 | 0 | 264.4450896 | 264.4389728 | 264.439048 | 264.412664 | 264.4227664 |
| 10/19/2013 18:10 | 0 | 264.4441752 | 264.4379728 | 264.436048 | 264.413664 | 264.4227664 |
| 10/19/2013 18:20 | 0 | 264.4435656 | 264.4339728 | 264.435048 | 264.413664 | 264.4217664 |
| 10/19/2013 18:30 | 0 | 264.4423464 | 264.4359728 | 264.436048 | 264.415664 | 264.4217664 |
| 10/19/2013 18:40 | 0 | 264.442956  | 264.4359728 | 264.435048 | 264.415664 | 264.4227664 |
| 10/19/2013 18:50 | 0 | 264.4432608 | 264.4389728 | 264.437048 | 264.418664 | 264.4247664 |
| 10/19/2013 19:00 | 0 | 264.4432608 | 264.4359728 | 264.434048 | 264.417664 | 264.4237664 |
| 10/19/2013 19:10 | 0 | 264.4426512 | 264.4359728 | 264.434048 | 264.414664 | 264.4217664 |
| 10/19/2013 19:20 | 0 | 264.4426512 | 264.4359728 | 264.434048 | 264.415664 | 264.4237664 |
| 10/19/2013 19:30 | 0 | 264.4423464 | 264.4349728 | 264.432048 | 264.416664 | 264.4227664 |
| 10/19/2013 19:40 | 0 | 264.441432  | 264.4329728 | 264.432048 | 264.414664 | 264.4207664 |
| 10/19/2013 19:50 | 0 | 264.4435656 | 264.4449728 | 264.435048 | 264.419664 | 264.4257664 |
| 10/19/2013 20:00 | 0 | 264.4438704 | 264.4379728 | 264.432048 | 264.416664 | 264.4227664 |
| 10/19/2013 20:10 | 0 | 264.442956  | 264.4339728 | 264.432048 | 264.415664 | 264.4217664 |
| 10/19/2013 20:20 | 0 | 264.4432608 | 264.4369728 | 264.432048 | 264.415664 | 264.4227664 |
| 10/19/2013 20:30 | 0 | 264.441432  | 264.4339728 | 264.434048 | 264.416664 | 264.4227664 |
| 10/19/2013 20:40 | 0 | 264.442956  | 264.4399728 | 264.432048 | 264.417664 | 264.4227664 |
| 10/19/2013 20:50 | 0 | 264.442956  | 264.4349728 | 264.432048 | 264.418664 | 264.4227664 |
| 10/19/2013 21:00 | 0 | 264.4423464 | 264.4369728 | 264.434048 | 264.415664 | 264.4227664 |
| 10/19/2013 21:10 | 0 | 264.4423464 | 264.4349728 | 264.432048 | 264.415664 | 264.4227664 |
| 10/19/2013 21:20 | 0 | 264.442956  | 264.4399728 | 264.435048 | 264.416664 | 264.4257664 |
| 10/19/2013 21:30 | 0 | 264.4438704 | 264.4419728 | 264.435048 | 264.420664 | 264.4277664 |
| 10/19/2013 21:40 | 0 | 264.4441752 | 264.4399728 | 264.435048 | 264.418664 | 264.4267664 |
| 10/19/2013 21:50 | 0 | 264.4441752 | 264.4389728 | 264.435048 | 264.417664 | 264.4247664 |
| 10/19/2013 22:00 | 0 | 264.4441752 | 264.4389728 | 264.435048 | 264.415664 | 264.4267664 |

|                  |   |             |             |            |            |             |
|------------------|---|-------------|-------------|------------|------------|-------------|
| 10/19/2013 22:10 | 0 | 264.4435656 | 264.4369728 | 264.436048 | 264.417664 | 264.4267664 |
| 10/19/2013 22:20 | 0 | 264.4423464 | 264.4309728 | 264.433048 | 264.414664 | 264.4227664 |
| 10/19/2013 22:30 | 0 | 264.4423464 | 264.4359728 | 264.435048 | 264.418664 | 264.4237664 |
| 10/19/2013 22:40 | 0 | 264.441432  | 264.4309728 | 264.431048 | 264.416664 | 264.4227664 |
| 10/19/2013 22:50 | 0 | 264.4411272 | 264.4299728 | 264.431048 | 264.414664 | 264.4207664 |
| 10/19/2013 23:00 | 0 | 264.441432  | 264.4379728 | 264.431048 | 264.418664 | 264.4237664 |
| 10/19/2013 23:10 | 0 | 264.4408224 | 264.4309728 | 264.431048 | 264.418664 | 264.4217664 |
| 10/19/2013 23:20 | 0 | 264.4408224 | 264.4349728 | 264.431048 | 264.416664 | 264.4237664 |
| 10/19/2013 23:30 | 0 | 264.4402128 | 264.4279728 | 264.431048 | 264.416664 | 264.4227664 |
| 10/19/2013 23:40 | 0 | 264.4389936 | 264.4299728 | 264.429048 | 264.418664 | 264.4227664 |
| 10/19/2013 23:50 | 0 | 264.4402128 | 264.4339728 | 264.431048 | 264.419664 | 264.4237664 |
| 10/20/2013 0:00  | 0 | 264.4374696 | 264.4219728 | 264.428048 | 264.418664 | 264.4187664 |
| 10/20/2013 0:10  | 0 | 264.4371648 | 264.4299728 | 264.430048 | 264.419664 | 264.4217664 |
| 10/20/2013 0:20  | 0 | 264.43686   | 264.4249728 | 264.427048 | 264.416664 | 264.4207664 |
| 10/20/2013 0:30  | 0 | 264.435336  | 264.4249728 | 264.426048 | 264.416664 | 264.4207664 |
| 10/20/2013 0:40  | 0 | 264.4341168 | 264.4249728 | 264.426048 | 264.418664 | 264.4187664 |
| 10/20/2013 0:50  | 0 | 264.4335072 | 264.4199728 | 264.424048 | 264.418664 | 264.4167664 |
| 10/20/2013 1:00  | 0 | 264.4325928 | 264.4229728 | 264.423048 | 264.418664 | 264.4157664 |
| 10/20/2013 1:10  | 0 | 264.4304592 | 264.4159728 | 264.423048 | 264.417664 | 264.4147664 |
| 10/20/2013 1:20  | 0 | 264.4316784 | 264.4229728 | 264.420048 | 264.417664 | 264.4147664 |
| 10/20/2013 1:30  | 0 | 264.42924   | 264.4179728 | 264.420048 | 264.420664 | 264.4167664 |
| 10/20/2013 1:40  | 0 | 264.4280208 | 264.4099728 | 264.419048 | 264.418664 | 264.4137664 |
| 10/20/2013 1:50  | 0 | 264.4283256 | 264.4189728 | 264.417048 | 264.419664 | 264.4147664 |
| 10/20/2013 2:00  | 0 | 264.424668  | 264.4049728 | 264.415048 | 264.415664 | 264.4097664 |
| 10/20/2013 2:10  | 0 | 264.4249728 | 264.4099728 | 264.415048 | 264.417664 | 264.4117664 |
| 10/20/2013 2:20  | 0 | 264.4243632 | 264.4089728 | 264.413048 | 264.416664 | 264.4107664 |
| 10/20/2013 2:30  | 0 | 264.423144  | 264.4119728 | 264.412048 | 264.416664 | 264.4087664 |
| 10/20/2013 2:40  | 0 | 264.420096  | 264.4039728 | 264.409048 | 264.417664 | 264.4107664 |
| 10/20/2013 2:50  | 0 | 264.4194864 | 264.4019728 | 264.408048 | 264.416664 | 264.4067664 |
| 10/20/2013 3:00  | 0 | 264.4182672 | 264.4069728 | 264.407048 | 264.415664 | 264.4047664 |
| 10/20/2013 3:10  | 0 | 264.4164384 | 264.3999728 | 264.405048 | 264.417664 | 264.4047664 |
| 10/20/2013 3:20  | 0 | 264.4161336 | 264.3979728 | 264.404048 | 264.416664 | 264.4027664 |
| 10/20/2013 3:30  | 0 | 264.415524  | 264.4029728 | 264.400048 | 264.413664 | 264.4037664 |
| 10/20/2013 3:40  | 0 | 264.4149144 | 264.4009728 | 264.402048 | 264.416664 | 264.4037664 |
| 10/20/2013 3:50  | 0 | 264.414     | 264.3989728 | 264.399048 | 264.415664 | 264.4037664 |
| 10/20/2013 4:00  | 0 | 264.412476  | 264.3969728 | 264.400048 | 264.415664 | 264.4027664 |
| 10/20/2013 4:10  | 0 | 264.4127808 | 264.3969728 | 264.398048 | 264.415664 | 264.4007664 |
| 10/20/2013 4:20  | 0 | 264.4106472 | 264.3939728 | 264.396048 | 264.415664 | 264.4007664 |
| 10/20/2013 4:30  | 0 | 264.4115616 | 264.3979728 | 264.398048 | 264.414664 | 264.4017664 |
| 10/20/2013 4:40  | 0 | 264.409428  | 264.3899728 | 264.392048 | 264.412664 | 264.3967664 |
| 10/20/2013 4:50  | 0 | 264.4085136 | 264.3919728 | 264.394048 | 264.414664 | 264.3967664 |
| 10/20/2013 5:00  | 0 | 264.407904  | 264.3919728 | 264.392048 | 264.414664 | 264.3987664 |
| 10/20/2013 5:10  | 0 | 264.4075992 | 264.3909728 | 264.392048 | 264.414664 | 264.3967664 |
| 10/20/2013 5:20  | 0 | 264.407904  | 264.3959728 | 264.393048 | 264.416664 | 264.3997664 |
| 10/20/2013 5:30  | 0 | 264.4066848 | 264.3879728 | 264.390048 | 264.410664 | 264.3947664 |
| 10/20/2013 5:40  | 0 | 264.40638   | 264.3939728 | 264.391048 | 264.414664 | 264.3977664 |
| 10/20/2013 5:50  | 0 | 264.4066848 | 264.3919728 | 264.391048 | 264.412664 | 264.3977664 |

|                  |   |             |             |            |            |             |
|------------------|---|-------------|-------------|------------|------------|-------------|
| 10/20/2013 6:00  | 0 | 264.4054656 | 264.3889728 | 264.389048 | 264.412664 | 264.3937664 |
| 10/20/2013 6:10  | 0 | 264.4051608 | 264.3889728 | 264.387048 | 264.410664 | 264.3937664 |
| 10/20/2013 6:20  | 0 | 264.404856  | 264.3909728 | 264.390048 | 264.411664 | 264.3947664 |
| 10/20/2013 6:30  | 0 | 264.4054656 | 264.3919728 | 264.388048 | 264.411664 | 264.3927664 |
| 10/20/2013 6:40  | 0 | 264.4045512 | 264.3899728 | 264.388048 | 264.411664 | 264.3927664 |
| 10/20/2013 6:50  | 0 | 264.404856  | 264.3929728 | 264.389048 | 264.411664 | 264.3947664 |
| 10/20/2013 7:00  | 0 | 264.4042464 | 264.3909728 | 264.388048 | 264.412664 | 264.3927664 |
| 10/20/2013 7:10  | 0 | 264.4042464 | 264.3909728 | 264.389048 | 264.412664 | 264.3937664 |
| 10/20/2013 7:20  | 0 | 264.4051608 | 264.3959728 | 264.391048 | 264.412664 | 264.3957664 |
| 10/20/2013 7:30  | 0 | 264.4042464 | 264.3919728 | 264.389048 | 264.412664 | 264.3937664 |
| 10/20/2013 7:40  | 0 | 264.4051608 | 264.3919728 | 264.388048 | 264.412664 | 264.3937664 |
| 10/20/2013 7:50  | 0 | 264.40638   | 264.3959728 | 264.388048 | 264.409664 | 264.3927664 |
| 10/20/2013 8:00  | 0 | 264.4057704 | 264.3939728 | 264.389048 | 264.409664 | 264.3907664 |
| 10/20/2013 8:10  | 0 | 264.4066848 | 264.3959728 | 264.389048 | 264.412664 | 264.3937664 |
| 10/20/2013 8:20  | 0 | 264.407904  | 264.3969728 | 264.389048 | 264.410664 | 264.3947664 |
| 10/20/2013 8:30  | 0 | 264.4082088 | 264.3979728 | 264.391048 | 264.407664 | 264.3947664 |
| 10/20/2013 8:40  | 0 | 264.4082088 | 264.3969728 | 264.391048 | 264.410664 | 264.3937664 |
| 10/20/2013 8:50  | 0 | 264.4097328 | 264.3989728 | 264.391048 | 264.410664 | 264.3957664 |
| 10/20/2013 9:00  | 0 | 264.4143048 | 264.4119728 | 264.393048 | 264.412664 | 264.3987664 |
| 10/20/2013 9:10  | 0 | 264.4146096 | 264.4049728 | 264.395048 | 264.411664 | 264.3987664 |
| 10/20/2013 9:20  | 0 | 264.4158288 | 264.4069728 | 264.398048 | 264.409664 | 264.3997664 |
| 10/20/2013 9:30  | 0 | 264.418572  | 264.4189728 | 264.400048 | 264.411664 | 264.4037664 |
| 10/20/2013 9:40  | 0 | 264.4194864 | 264.4159728 | 264.403048 | 264.410664 | 264.4007664 |
| 10/20/2013 9:50  | 0 | 264.4213152 | 264.4179728 | 264.406048 | 264.411664 | 264.4037664 |
| 10/20/2013 10:00 | 0 | 264.424668  | 264.4289728 | 264.408048 | 264.412664 | 264.4077664 |
| 10/20/2013 10:10 | 0 | 264.4268016 | 264.4259728 | 264.408048 | 264.409664 | 264.4067664 |
| 10/20/2013 10:20 | 0 | 264.4289352 | 264.4289728 | 264.412048 | 264.411664 | 264.4087664 |
| 10/20/2013 10:30 | 0 | 264.430764  | 264.4329728 | 264.414048 | 264.409664 | 264.4097664 |
| 10/20/2013 10:40 | 0 | 264.432288  | 264.4319728 | 264.418048 | 264.409664 | 264.4117664 |
| 10/20/2013 10:50 | 0 | 264.435336  | 264.4409728 | 264.420048 | 264.409664 | 264.4147664 |
| 10/20/2013 11:00 | 0 | 264.438384  | 264.4449728 | 264.426048 | 264.408664 | 264.4177664 |
| 10/20/2013 11:10 | 0 | 264.4402128 | 264.4459728 | 264.428048 | 264.409664 | 264.4187664 |
| 10/20/2013 11:20 | 0 | 264.4423464 | 264.4459728 | 264.430048 | 264.408664 | 264.4187664 |
| 10/20/2013 11:30 | 0 | 264.4447848 | 264.4489728 | 264.434048 | 264.409664 | 264.4217664 |
| 10/20/2013 11:40 | 0 | 264.4456992 | 264.4499728 | 264.437048 | 264.412664 | 264.4217664 |
| 10/20/2013 11:50 | 0 | 264.447528  | 264.4539728 | 264.439048 | 264.410664 | 264.4247664 |
| 10/20/2013 12:00 | 0 | 264.4478328 | 264.4489728 | 264.438048 | 264.409664 | 264.4217664 |
| 10/20/2013 12:10 | 0 | 264.4496616 | 264.4549728 | 264.441048 | 264.409664 | 264.4257664 |
| 10/20/2013 12:20 | 0 | 264.450576  | 264.4519728 | 264.445048 | 264.411664 | 264.4257664 |
| 10/20/2013 12:30 | 0 | 264.4527096 | 264.4589728 | 264.446048 | 264.409664 | 264.4267664 |
| 10/20/2013 12:40 | 0 | 264.4542336 | 264.4619728 | 264.447048 | 264.409664 | 264.4287664 |
| 10/20/2013 12:50 | 0 | 264.4539288 | 264.4549728 | 264.449048 | 264.408664 | 264.4297664 |
| 10/20/2013 13:00 | 0 | 264.4554528 | 264.4579728 | 264.450048 | 264.410664 | 264.4317664 |
| 10/20/2013 13:10 | 0 | 264.4560624 | 264.4599728 | 264.450048 | 264.410664 | 264.4297664 |
| 10/20/2013 13:20 | 0 | 264.4557576 | 264.4579728 | 264.451048 | 264.414664 | 264.4287664 |
| 10/20/2013 13:30 | 0 | 264.4554528 | 264.4549728 | 264.453048 | 264.413664 | 264.4307664 |
| 10/20/2013 13:40 | 0 | 264.455148  | 264.4539728 | 264.451048 | 264.411664 | 264.4307664 |

|                  |   |             |             |            |            |             |
|------------------|---|-------------|-------------|------------|------------|-------------|
| 10/20/2013 13:50 | 0 | 264.4548432 | 264.4519728 | 264.449048 | 264.411664 | 264.4287664 |
| 10/20/2013 14:00 | 0 | 264.455148  | 264.4549728 | 264.450048 | 264.412664 | 264.4297664 |
| 10/20/2013 14:10 | 0 | 264.4548432 | 264.4539728 | 264.450048 | 264.413664 | 264.4287664 |
| 10/20/2013 14:20 | 0 | 264.455148  | 264.4539728 | 264.452048 | 264.413664 | 264.4307664 |
| 10/20/2013 14:30 | 0 | 264.4554528 | 264.4539728 | 264.452048 | 264.413664 | 264.4307664 |
| 10/20/2013 14:40 | 0 | 264.4542336 | 264.4509728 | 264.449048 | 264.413664 | 264.4297664 |
| 10/20/2013 14:50 | 0 | 264.4533192 | 264.4469728 | 264.450048 | 264.414664 | 264.4297664 |
| 10/20/2013 15:00 | 0 | 264.4524048 | 264.4459728 | 264.450048 | 264.413664 | 264.4287664 |
| 10/20/2013 15:10 | 0 | 264.4514904 | 264.4489728 | 264.449048 | 264.414664 | 264.4277664 |
| 10/20/2013 15:20 | 0 | 264.4521    | 264.4469728 | 264.448048 | 264.414664 | 264.4297664 |
| 10/20/2013 15:30 | 0 | 264.4530144 | 264.4509728 | 264.446048 | 264.411664 | 264.4287664 |
| 10/20/2013 15:40 | 0 | 264.4530144 | 264.4499728 | 264.448048 | 264.414664 | 264.4317664 |
| 10/20/2013 15:50 | 0 | 264.4530144 | 264.4499728 | 264.448048 | 264.414664 | 264.4297664 |
| 10/20/2013 16:00 | 0 | 264.4527096 | 264.4509728 | 264.448048 | 264.413664 | 264.4297664 |
| 10/20/2013 16:10 | 0 | 264.4517952 | 264.4489728 | 264.446048 | 264.415664 | 264.4267664 |
| 10/20/2013 16:20 | 0 | 264.4511856 | 264.4459728 | 264.446048 | 264.413664 | 264.4277664 |
| 10/20/2013 16:30 | 0 | 264.4499664 | 264.4479728 | 264.447048 | 264.415664 | 264.4287664 |
| 10/20/2013 16:40 | 0 | 264.449052  | 264.4449728 | 264.445048 | 264.416664 | 264.4277664 |
| 10/20/2013 16:50 | 0 | 264.4484424 | 264.4479728 | 264.445048 | 264.415664 | 264.4277664 |
| 10/20/2013 17:00 | 0 | 264.4481376 | 264.4449728 | 264.443048 | 264.416664 | 264.4267664 |
| 10/20/2013 17:10 | 0 | 264.4481376 | 264.4449728 | 264.443048 | 264.416664 | 264.4277664 |
| 10/20/2013 17:20 | 0 | 264.4481376 | 264.4449728 | 264.443048 | 264.416664 | 264.4267664 |
| 10/20/2013 17:30 | 0 | 264.4478328 | 264.4459728 | 264.443048 | 264.415664 | 264.4257664 |
| 10/20/2013 17:40 | 0 | 264.447528  | 264.4429728 | 264.442048 | 264.414664 | 264.4247664 |
| 10/20/2013 17:50 | 0 | 264.4469184 | 264.4449728 | 264.442048 | 264.414664 | 264.4247664 |
| 10/20/2013 18:00 | 0 | 264.4469184 | 264.4449728 | 264.440048 | 264.415664 | 264.4247664 |
| 10/20/2013 18:10 | 0 | 264.4469184 | 264.4439728 | 264.442048 | 264.415664 | 264.4247664 |
| 10/20/2013 18:20 | 0 | 264.4466136 | 264.4409728 | 264.439048 | 264.414664 | 264.4257664 |
| 10/20/2013 18:30 | 0 | 264.4463088 | 264.4439728 | 264.440048 | 264.416664 | 264.4257664 |
| 10/20/2013 18:40 | 0 | 264.446004  | 264.4409728 | 264.439048 | 264.415664 | 264.4247664 |
| 10/20/2013 18:50 | 0 | 264.446004  | 264.4419728 | 264.437048 | 264.415664 | 264.4267664 |
| 10/20/2013 19:00 | 0 | 264.4463088 | 264.4399728 | 264.437048 | 264.416664 | 264.4237664 |
| 10/20/2013 19:10 | 0 | 264.4463088 | 264.4429728 | 264.437048 | 264.413664 | 264.4247664 |
| 10/20/2013 19:20 | 0 | 264.4463088 | 264.4429728 | 264.438048 | 264.415664 | 264.4257664 |
| 10/20/2013 19:30 | 0 | 264.446004  | 264.4409728 | 264.438048 | 264.417664 | 264.4267664 |
| 10/20/2013 19:40 | 0 | 264.446004  | 264.4429728 | 264.438048 | 264.414664 | 264.4257664 |
| 10/20/2013 19:50 | 0 | 264.4463088 | 264.4419728 | 264.437048 | 264.415664 | 264.4237664 |
| 10/20/2013 20:00 | 0 | 264.4469184 | 264.4439728 | 264.440048 | 264.415664 | 264.4257664 |
| 10/20/2013 20:10 | 0 | 264.4472232 | 264.4439728 | 264.439048 | 264.416664 | 264.4247664 |
| 10/20/2013 20:20 | 0 | 264.4481376 | 264.4439728 | 264.438048 | 264.416664 | 264.4247664 |
| 10/20/2013 20:30 | 0 | 264.4487472 | 264.4459728 | 264.439048 | 264.416664 | 264.4237664 |
| 10/20/2013 20:40 | 0 | 264.4496616 | 264.4499728 | 264.439048 | 264.416664 | 264.4267664 |
| 10/20/2013 20:50 | 0 | 264.4502712 | 264.4489728 | 264.441048 | 264.415664 | 264.4267664 |
| 10/20/2013 21:00 | 0 | 264.4508808 | 264.4519728 | 264.442048 | 264.415664 | 264.4277664 |
| 10/20/2013 21:10 | 0 | 264.4521    | 264.4519728 | 264.442048 | 264.416664 | 264.4297664 |
| 10/20/2013 21:20 | 0 | 264.4527096 | 264.4509728 | 264.443048 | 264.418664 | 264.4287664 |
| 10/20/2013 21:30 | 0 | 264.4533192 | 264.4539728 | 264.445048 | 264.417664 | 264.4287664 |

|                  |   |             |             |            |            |             |
|------------------|---|-------------|-------------|------------|------------|-------------|
| 10/20/2013 21:40 | 0 | 264.4542336 | 264.4529728 | 264.446048 | 264.417664 | 264.4307664 |
| 10/20/2013 21:50 | 0 | 264.4545384 | 264.4509728 | 264.446048 | 264.417664 | 264.4307664 |
| 10/20/2013 22:00 | 0 | 264.4548432 | 264.4539728 | 264.446048 | 264.418664 | 264.4317664 |
| 10/20/2013 22:10 | 0 | 264.4545384 | 264.4519728 | 264.446048 | 264.415664 | 264.4307664 |
| 10/20/2013 22:20 | 0 | 264.4545384 | 264.4509728 | 264.448048 | 264.417664 | 264.4307664 |
| 10/20/2013 22:30 | 0 | 264.4545384 | 264.4499728 | 264.444048 | 264.416664 | 264.4297664 |
| 10/20/2013 22:40 | 0 | 264.4545384 | 264.4479728 | 264.444048 | 264.415664 | 264.4287664 |
| 10/20/2013 22:50 | 0 | 264.453624  | 264.4469728 | 264.445048 | 264.417664 | 264.4317664 |
| 10/20/2013 23:00 | 0 | 264.4527096 | 264.4459728 | 264.445048 | 264.416664 | 264.4297664 |
| 10/20/2013 23:10 | 0 | 264.4514904 | 264.4439728 | 264.444048 | 264.418664 | 264.4277664 |
| 10/20/2013 23:20 | 0 | 264.450576  | 264.4459728 | 264.447048 | 264.422664 | 264.4297664 |
| 10/20/2013 23:30 | 0 | 264.4496616 | 264.4399728 | 264.441048 | 264.417664 | 264.4257664 |
| 10/20/2013 23:40 | 0 | 264.4484424 | 264.4409728 | 264.440048 | 264.418664 | 264.4277664 |
| 10/20/2013 23:50 | 0 | 264.4469184 | 264.4359728 | 264.440048 | 264.416664 | 264.4277664 |
| 10/21/2013 0:00  | 0 | 264.4456992 | 264.4349728 | 264.437048 | 264.417664 | 264.4247664 |
| 10/21/2013 0:10  | 0 | 264.4441752 | 264.4329728 | 264.438048 | 264.417664 | 264.4257664 |
| 10/21/2013 0:20  | 0 | 264.4426512 | 264.4309728 | 264.436048 | 264.417664 | 264.4237664 |
| 10/21/2013 0:30  | 0 | 264.4408224 | 264.4299728 | 264.436048 | 264.418664 | 264.4247664 |
| 10/21/2013 0:40  | 0 | 264.438384  | 264.4239728 | 264.433048 | 264.416664 | 264.4217664 |
| 10/21/2013 0:50  | 0 | 264.4356408 | 264.4169728 | 264.429048 | 264.420664 | 264.4187664 |
| 10/21/2013 1:00  | 0 | 264.4341168 | 264.4219728 | 264.429048 | 264.418664 | 264.4187664 |
| 10/21/2013 1:10  | 0 | 264.4316784 | 264.4109728 | 264.427048 | 264.416664 | 264.4167664 |
| 10/21/2013 1:20  | 0 | 264.4298496 | 264.4129728 | 264.421048 | 264.417664 | 264.4137664 |
| 10/21/2013 1:30  | 0 | 264.4289352 | 264.4079728 | 264.419048 | 264.415664 | 264.4147664 |
| 10/21/2013 1:40  | 0 | 264.4252776 | 264.4119728 | 264.419048 | 264.419664 | 264.4117664 |
| 10/21/2013 1:50  | 0 | 264.4252776 | 264.4069728 | 264.416048 | 264.416664 | 264.4117664 |
| 10/21/2013 2:00  | 0 | 264.42162   | 264.4059728 | 264.412048 | 264.415664 | 264.4087664 |
| 10/21/2013 2:10  | 0 | 264.4204008 | 264.3989728 | 264.412048 | 264.416664 | 264.4087664 |
| 10/21/2013 2:20  | 0 | 264.4194864 | 264.4059728 | 264.407048 | 264.415664 | 264.4067664 |
| 10/21/2013 2:30  | 0 | 264.4152192 | 264.3909728 | 264.405048 | 264.415664 | 264.4037664 |
| 10/21/2013 2:40  | 0 | 264.4143048 | 264.3939728 | 264.405048 | 264.417664 | 264.4037664 |
| 10/21/2013 2:50  | 0 | 264.414     | 264.3989728 | 264.401048 | 264.415664 | 264.4037664 |
| 10/21/2013 3:00  | 0 | 264.4127808 | 264.3959728 | 264.399048 | 264.414664 | 264.4007664 |
| 10/21/2013 3:10  | 0 | 264.4112568 | 264.3949728 | 264.399048 | 264.414664 | 264.4007664 |
| 10/21/2013 3:20  | 0 | 264.4097328 | 264.3919728 | 264.397048 | 264.414664 | 264.3987664 |
| 10/21/2013 3:30  | 0 | 264.4091232 | 264.3899728 | 264.396048 | 264.414664 | 264.4007664 |
| 10/21/2013 3:40  | 0 | 264.4082088 | 264.3919728 | 264.396048 | 264.414664 | 264.3957664 |
| 10/21/2013 3:50  | 0 | 264.4075992 | 264.3919728 | 264.395048 | 264.418664 | 264.3997664 |
| 10/21/2013 4:00  | 0 | 264.40638   | 264.3909728 | 264.390048 | 264.413664 | 264.3947664 |
| 10/21/2013 4:10  | 0 | 264.4057704 | 264.3919728 | 264.392048 | 264.415664 | 264.3947664 |
| 10/21/2013 4:20  | 0 | 264.4039416 | 264.3859728 | 264.388048 | 264.415664 | 264.3917664 |
| 10/21/2013 4:30  | 0 | 264.4042464 | 264.3879728 | 264.388048 | 264.414664 | 264.3937664 |
| 10/21/2013 4:40  | 0 | 264.4024176 | 264.3849728 | 264.386048 | 264.412664 | 264.3907664 |
| 10/21/2013 4:50  | 0 | 264.4021128 | 264.3839728 | 264.388048 | 264.415664 | 264.3937664 |
| 10/21/2013 5:00  | 0 | 264.4011984 | 264.3839728 | 264.386048 | 264.415664 | 264.3937664 |
| 10/21/2013 5:10  | 0 | 264.401808  | 264.3849728 | 264.384048 | 264.412664 | 264.3907664 |
| 10/21/2013 5:20  | 0 | 264.4008936 | 264.3869728 | 264.388048 | 264.415664 | 264.3937664 |

|                  |   |             |             |            |            |             |
|------------------|---|-------------|-------------|------------|------------|-------------|
| 10/21/2013 5:30  | 0 | 264.4008936 | 264.3849728 | 264.385048 | 264.414664 | 264.3907664 |
| 10/21/2013 5:40  | 0 | 264.4005888 | 264.3859728 | 264.384048 | 264.409664 | 264.3907664 |
| 10/21/2013 5:50  | 0 | 264.4005888 | 264.3829728 | 264.381048 | 264.408664 | 264.3877664 |
| 10/21/2013 6:00  | 0 | 264.3999792 | 264.3849728 | 264.381048 | 264.411664 | 264.3877664 |
| 10/21/2013 6:10  | 0 | 264.3999792 | 264.3879728 | 264.385048 | 264.413664 | 264.3877664 |
| 10/21/2013 6:20  | 0 | 264.4011984 | 264.3839728 | 264.382048 | 264.411664 | 264.3867664 |
| 10/21/2013 6:30  | 0 | 264.4005888 | 264.3889728 | 264.382048 | 264.412664 | 264.3887664 |
| 10/21/2013 6:40  | 0 | 264.4005888 | 264.3889728 | 264.384048 | 264.412664 | 264.3897664 |
| 10/21/2013 6:50  | 0 | 264.4027224 | 264.3919728 | 264.385048 | 264.412664 | 264.3907664 |
| 10/21/2013 7:00  | 0 | 264.4027224 | 264.3929728 | 264.385048 | 264.413664 | 264.3887664 |
| 10/21/2013 7:10  | 0 | 264.4054656 | 264.3979728 | 264.386048 | 264.413664 | 264.3927664 |
| 10/21/2013 7:20  | 0 | 264.4088184 | 264.4089728 | 264.389048 | 264.412664 | 264.3947664 |
| 10/21/2013 7:30  | 0 | 264.4103424 | 264.4059728 | 264.390048 | 264.414664 | 264.3947664 |
| 10/21/2013 7:40  | 0 | 264.4121712 | 264.4059728 | 264.394048 | 264.412664 | 264.3947664 |
| 10/21/2013 7:50  | 0 | 264.4152192 | 264.4159728 | 264.395048 | 264.414664 | 264.3987664 |
| 10/21/2013 8:00  | 0 | 264.4182672 | 264.4149728 | 264.395048 | 264.409664 | 264.3987664 |
| 10/21/2013 8:10  | 0 | 264.42162   | 264.4219728 | 264.401048 | 264.411664 | 264.4027664 |
| 10/21/2013 8:20  | 0 | 264.4252776 | 264.4279728 | 264.405048 | 264.411664 | 264.4027664 |
| 10/21/2013 8:30  | 0 | 264.4289352 | 264.4319728 | 264.409048 | 264.411664 | 264.4057664 |
| 10/21/2013 8:40  | 0 | 264.4313736 | 264.4329728 | 264.415048 | 264.411664 | 264.4097664 |
| 10/21/2013 8:50  | 0 | 264.4362504 | 264.4419728 | 264.417048 | 264.409664 | 264.4117664 |
| 10/21/2013 9:00  | 0 | 264.4392984 | 264.4449728 | 264.423048 | 264.409664 | 264.4137664 |
| 10/21/2013 9:10  | 0 | 264.442956  | 264.4499728 | 264.428048 | 264.409664 | 264.4187664 |
| 10/21/2013 9:20  | 0 | 264.4441752 | 264.4499728 | 264.432048 | 264.412664 | 264.4167664 |
| 10/21/2013 9:30  | 0 | 264.4463088 | 264.4479728 | 264.436048 | 264.410664 | 264.4187664 |
| 10/21/2013 9:40  | 0 | 264.4493568 | 264.4569728 | 264.437048 | 264.409664 | 264.4217664 |
| 10/21/2013 9:50  | 0 | 264.4493568 | 264.4499728 | 264.440048 | 264.411664 | 264.4207664 |
| 10/21/2013 10:00 | 0 | 264.4517952 | 264.4569728 | 264.445048 | 264.412664 | 264.4247664 |
| 10/21/2013 10:10 | 0 | 264.4517952 | 264.4539728 | 264.445048 | 264.411664 | 264.4237664 |
| 10/21/2013 10:20 | 0 | 264.4530144 | 264.4549728 | 264.448048 | 264.414664 | 264.4267664 |
| 10/21/2013 10:30 | 0 | 264.4527096 | 264.4529728 | 264.446048 | 264.412664 | 264.4267664 |
| 10/21/2013 10:40 | 0 | 264.4527096 | 264.4529728 | 264.448048 | 264.412664 | 264.4297664 |
| 10/21/2013 10:50 | 0 | 264.4517952 | 264.4499728 | 264.446048 | 264.412664 | 264.4267664 |
| 10/21/2013 11:00 | 0 | 264.4514904 | 264.4479728 | 264.446048 | 264.412664 | 264.4267664 |
| 10/21/2013 11:10 | 0 | 264.4517952 | 264.4489728 | 264.446048 | 264.411664 | 264.4257664 |
| 10/21/2013 11:20 | 0 | 264.450576  | 264.4439728 | 264.445048 | 264.411664 | 264.4227664 |
| 10/21/2013 11:30 | 0 | 264.4499664 | 264.4479728 | 264.445048 | 264.414664 | 264.4267664 |
| 10/21/2013 11:40 | 0 | 264.4487472 | 264.4449728 | 264.445048 | 264.410664 | 264.4247664 |
| 10/21/2013 11:50 | 0 | 264.4472232 | 264.4419728 | 264.444048 | 264.411664 | 264.4247664 |
| 10/21/2013 12:00 | 0 | 264.4466136 | 264.4399728 | 264.443048 | 264.411664 | 264.4247664 |
| 10/21/2013 12:10 | 0 | 264.4441752 | 264.4349728 | 264.440048 | 264.411664 | 264.4227664 |
| 10/21/2013 12:20 | 0 | 264.4453944 | 264.4409728 | 264.440048 | 264.413664 | 264.4237664 |
| 10/21/2013 12:30 | 0 | 264.44448   | 264.4389728 | 264.441048 | 264.412664 | 264.4217664 |
| 10/21/2013 12:40 | 0 | 264.4432608 | 264.4379728 | 264.437048 | 264.410664 | 264.4197664 |
| 10/21/2013 12:50 | 0 | 264.4426512 | 264.4369728 | 264.439048 | 264.413664 | 264.4227664 |
| 10/21/2013 13:00 | 0 | 264.4426512 | 264.4379728 | 264.438048 | 264.413664 | 264.4227664 |
| 10/21/2013 13:10 | 0 | 264.4420416 | 264.4359728 | 264.436048 | 264.412664 | 264.4207664 |

|                  |   |             |             |            |            |             |
|------------------|---|-------------|-------------|------------|------------|-------------|
| 10/21/2013 13:20 | 0 | 264.4411272 | 264.4329728 | 264.435048 | 264.411664 | 264.4217664 |
| 10/21/2013 13:30 | 0 | 264.4408224 | 264.4329728 | 264.432048 | 264.410664 | 264.4197664 |
| 10/21/2013 13:40 | 0 | 264.4386888 | 264.4309728 | 264.432048 | 264.411664 | 264.4197664 |
| 10/21/2013 13:50 | 0 | 264.4405176 | 264.4369728 | 264.433048 | 264.412664 | 264.4217664 |
| 10/21/2013 14:00 | 0 | 264.439908  | 264.4349728 | 264.433048 | 264.413664 | 264.4197664 |
| 10/21/2013 14:10 | 0 | 264.4396032 | 264.4339728 | 264.434048 | 264.412664 | 264.4207664 |
| 10/21/2013 14:20 | 0 | 264.438384  | 264.4309728 | 264.429048 | 264.411664 | 264.4177664 |
| 10/21/2013 14:30 | 0 | 264.4386888 | 264.4309728 | 264.431048 | 264.412664 | 264.4177664 |
| 10/21/2013 14:40 | 0 | 264.438384  | 264.4339728 | 264.430048 | 264.412664 | 264.4187664 |
| 10/21/2013 14:50 | 0 | 264.4392984 | 264.4359728 | 264.430048 | 264.412664 | 264.4187664 |
| 10/21/2013 15:00 | 0 | 264.4374696 | 264.4319728 | 264.432048 | 264.413664 | 264.4207664 |
| 10/21/2013 15:10 | 0 | 264.4365552 | 264.4309728 | 264.429048 | 264.413664 | 264.4187664 |
| 10/21/2013 15:20 | 0 | 264.4356408 | 264.4319728 | 264.429048 | 264.412664 | 264.4167664 |
| 10/21/2013 15:30 | 0 | 264.433812  | 264.4239728 | 264.430048 | 264.413664 | 264.4167664 |
| 10/21/2013 15:40 | 0 | 264.433812  | 264.4269728 | 264.427048 | 264.413664 | 264.4167664 |
| 10/21/2013 15:50 | 0 | 264.4325928 | 264.4269728 | 264.425048 | 264.413664 | 264.4167664 |
| 10/21/2013 16:00 | 0 | 264.4325928 | 264.4269728 | 264.425048 | 264.412664 | 264.4157664 |
| 10/21/2013 16:10 | 0 | 264.430764  | 264.4239728 | 264.425048 | 264.413664 | 264.4137664 |
| 10/21/2013 16:20 | 0 | 264.4319832 | 264.4289728 | 264.423048 | 264.413664 | 264.4157664 |
| 10/21/2013 16:30 | 0 | 264.4298496 | 264.4189728 | 264.422048 | 264.410664 | 264.4137664 |
| 10/21/2013 16:40 | 0 | 264.4304592 | 264.4279728 | 264.421048 | 264.412664 | 264.4137664 |
| 10/21/2013 16:50 | 0 | 264.4289352 | 264.4219728 | 264.422048 | 264.415664 | 264.4157664 |
| 10/21/2013 17:00 | 0 | 264.4304592 | 264.4289728 | 264.423048 | 264.415664 | 264.4157664 |
| 10/21/2013 17:10 | 0 | 264.4283256 | 264.4229728 | 264.419048 | 264.414664 | 264.4157664 |
| 10/21/2013 17:20 | 0 | 264.4286304 | 264.4229728 | 264.419048 | 264.414664 | 264.4137664 |
| 10/21/2013 17:30 | 0 | 264.4286304 | 264.4259728 | 264.419048 | 264.412664 | 264.4107664 |
| 10/21/2013 17:40 | 0 | 264.4280208 | 264.4189728 | 264.421048 | 264.417664 | 264.4137664 |
| 10/21/2013 17:50 | 0 | 264.4286304 | 264.4259728 | 264.419048 | 264.416664 | 264.4127664 |
| 10/21/2013 18:00 | 0 | 264.4289352 | 264.4199728 | 264.419048 | 264.414664 | 264.4127664 |
| 10/21/2013 18:10 | 0 | 264.4295448 | 264.4259728 | 264.419048 | 264.412664 | 264.4147664 |
| 10/21/2013 18:20 | 0 | 264.4289352 | 264.4209728 | 264.419048 | 264.411664 | 264.4117664 |
| 10/21/2013 18:30 | 0 | 264.430764  | 264.4279728 | 264.419048 | 264.413664 | 264.4127664 |
| 10/21/2013 18:40 | 0 | 264.4316784 | 264.4279728 | 264.419048 | 264.411664 | 264.4137664 |
| 10/21/2013 18:50 | 0 | 264.4328976 | 264.4329728 | 264.424048 | 264.413664 | 264.4147664 |
| 10/21/2013 19:00 | 0 | 264.4325928 | 264.4309728 | 264.423048 | 264.413664 | 264.4147664 |
| 10/21/2013 19:10 | 0 | 264.433812  | 264.4329728 | 264.426048 | 264.415664 | 264.4167664 |
| 10/21/2013 19:20 | 0 | 264.4332024 | 264.4329728 | 264.425048 | 264.413664 | 264.4167664 |
| 10/21/2013 19:30 | 0 | 264.4347264 | 264.4349728 | 264.425048 | 264.415664 | 264.4167664 |
| 10/21/2013 19:40 | 0 | 264.4344216 | 264.4309728 | 264.426048 | 264.415664 | 264.4187664 |
| 10/21/2013 19:50 | 0 | 264.4356408 | 264.4359728 | 264.426048 | 264.413664 | 264.4187664 |
| 10/21/2013 20:00 | 0 | 264.4365552 | 264.4359728 | 264.428048 | 264.411664 | 264.4197664 |
| 10/21/2013 20:10 | 0 | 264.4374696 | 264.4379728 | 264.429048 | 264.415664 | 264.4187664 |
| 10/21/2013 20:20 | 0 | 264.4386888 | 264.4409728 | 264.430048 | 264.414664 | 264.4197664 |
| 10/21/2013 20:30 | 0 | 264.439908  | 264.4419728 | 264.432048 | 264.414664 | 264.4207664 |
| 10/21/2013 20:40 | 0 | 264.4408224 | 264.4419728 | 264.433048 | 264.414664 | 264.4227664 |
| 10/21/2013 20:50 | 0 | 264.4423464 | 264.4439728 | 264.433048 | 264.412664 | 264.4227664 |
| 10/21/2013 21:00 | 0 | 264.4435656 | 264.4459728 | 264.434048 | 264.414664 | 264.4247664 |



|                  |        |             |             |            |            |             |
|------------------|--------|-------------|-------------|------------|------------|-------------|
| 10/21/2013 21:10 | 0      | 264.4447848 | 264.4439728 | 264.436048 | 264.412664 | 264.4257664 |
| 10/21/2013 21:20 | 0      | 264.4456992 | 264.4459728 | 264.437048 | 264.414664 | 264.4257664 |
| 10/21/2013 21:30 | 0      | 264.4466136 | 264.4469728 | 264.438048 | 264.414664 | 264.4277664 |
| 10/21/2013 21:40 | 0      | 264.4472232 | 264.4499728 | 264.441048 | 264.415664 | 264.4297664 |
| 10/21/2013 21:50 | 0      | 264.447528  | 264.4469728 | 264.440048 | 264.414664 | 264.4257664 |
| 10/21/2013 22:00 | 0      | 264.4478328 | 264.4469728 | 264.441048 | 264.413664 | 264.4287664 |
| 10/21/2013 22:10 | 0      | 264.4478328 | 264.4469728 | 264.442048 | 264.415664 | 264.4277664 |
| 10/21/2013 22:20 | 0      | 264.4484424 | 264.4489728 | 264.443048 | 264.415664 | 264.4307664 |
| 10/21/2013 22:30 | 0      | 264.4484424 | 264.4469728 | 264.444048 | 264.415664 | 264.4307664 |
| 10/21/2013 22:40 | 0      | 264.4484424 | 264.4489728 | 264.443048 | 264.417664 | 264.4317664 |
| 10/21/2013 22:50 | 0      | 264.4484424 | 264.4469728 | 264.442048 | 264.412664 | 264.4297664 |
| 10/21/2013 23:00 | 0      | 264.4484424 | 264.4469728 | 264.444048 | 264.414664 | 264.4307664 |
| 10/21/2013 23:10 | 0      | 264.447528  | 264.4449728 | 264.444048 | 264.415664 | 264.4307664 |
| 10/21/2013 23:20 | 0      | 264.4466136 | 264.4419728 | 264.443048 | 264.416664 | 264.4297664 |
| 10/21/2013 23:30 | 0      | 264.446004  | 264.4429728 | 264.443048 | 264.418664 | 264.4277664 |
| 10/21/2013 23:40 | 0      | 264.4450896 | 264.4399728 | 264.441048 | 264.416664 | 264.4277664 |
| 10/21/2013 23:50 | 0      | 264.4441752 | 264.4369728 | 264.439048 | 264.415664 | 264.4257664 |
| 10/22/2013 0:00  | 0      | 264.442956  | 264.4359728 | 264.439048 | 264.416664 | 264.4257664 |
| 10/22/2013 0:10  | 0      | 264.441432  | 264.4349728 | 264.436048 | 264.414664 | 264.4247664 |
| 10/22/2013 0:20  | 0      | 264.439908  | 264.4319728 | 264.435048 | 264.416664 | 264.4227664 |
| 10/22/2013 0:30  | 0      | 264.4380792 | 264.4279728 | 264.433048 | 264.418664 | 264.4227664 |
| 10/22/2013 0:40  | 0      | 264.4362504 | 264.4269728 | 264.431048 | 264.414664 | 264.4207664 |
| 10/22/2013 0:50  | 0      | 264.4347264 | 264.4219728 | 264.429048 | 264.414664 | 264.4177664 |
| 10/22/2013 1:00  | 0      | 264.4332024 | 264.4209728 | 264.428048 | 264.415664 | 264.4187664 |
| 10/22/2013 1:10  | 0      | 264.4301544 | 264.4149728 | 264.425048 | 264.417664 | 264.4157664 |
| 10/22/2013 1:20  | 0      | 264.4304592 | 264.4229728 | 264.424048 | 264.416664 | 264.4187664 |
| 10/22/2013 1:30  | 0      | 264.4289352 | 264.4159728 | 264.423048 | 264.416664 | 264.4147664 |
| 10/22/2013 1:40  | 0      | 264.4243632 | 264.4089728 | 264.419048 | 264.418664 | 264.4127664 |
| 10/22/2013 1:50  | 0      | 264.4240584 | 264.4079728 | 264.413048 | 264.413664 | 264.4117664 |
| 10/22/2013 2:00  | 0      | 264.4191816 | 264.4019728 | 264.413048 | 264.415664 | 264.4087664 |
| 10/22/2013 2:10  | 0      | 264.4204008 | 264.4089728 | 264.411048 | 264.415664 | 264.4107664 |
| 10/22/2013 2:20  | 0      | 264.4164384 | 264.3989728 | 264.409048 | 264.414664 | 264.4057664 |
| 10/22/2013 2:30  | 0      | 264.4143048 | 264.3979728 | 264.406048 | 264.414664 | 264.4047664 |
| 10/22/2013 2:40  | 0      | 264.412476  | 264.3909728 | 264.404048 | 264.416664 | 264.4047664 |
| 10/22/2013 2:50  | 0      | 264.4106472 | 264.3899728 | 264.400048 | 264.414664 | 264.4007664 |
| 10/22/2013 3:00  | 0      | 264.4097328 | 264.3919728 | 264.400048 | 264.415664 | 264.4017664 |
| 10/22/2013 3:10  | 0      | 264.4085136 | 264.3959728 | 264.398048 | 264.415664 | 264.4017664 |
| 10/22/2013 3:20  | 0.0254 | 264.4072944 | 264.3919728 | 264.396048 | 264.415664 | 264.4007664 |
| 10/22/2013 3:30  | 0.0254 | 264.4066848 | 264.3919728 | 264.395048 | 264.413664 | 264.3997664 |
| 10/22/2013 3:40  | 0.0508 | 264.4057704 | 264.3919728 | 264.391048 | 264.412664 | 264.3977664 |
| 10/22/2013 3:50  | 0.0508 | 264.404856  | 264.3909728 | 264.393048 | 264.414664 | 264.3977664 |
| 10/22/2013 4:00  | 0.0508 | 264.4039416 | 264.3889728 | 264.391048 | 264.415664 | 264.3967664 |
| 10/22/2013 4:10  | 0.0508 | 264.4024176 | 264.3889728 | 264.390048 | 264.413664 | 264.3967664 |
| 10/22/2013 4:20  | 0.0508 | 264.4021128 | 264.3889728 | 264.386048 | 264.411664 | 264.3947664 |
| 10/22/2013 4:30  | 0.0508 | 264.3999792 | 264.3839728 | 264.387048 | 264.412664 | 264.3927664 |
| 10/22/2013 4:40  | 0.0508 | 264.3999792 | 264.3809728 | 264.385048 | 264.409664 | 264.3917664 |
| 10/22/2013 4:50  | 0.0508 | 264.3996744 | 264.3839728 | 264.385048 | 264.410664 | 264.3907664 |

|                  |        |             |             |            |            |             |
|------------------|--------|-------------|-------------|------------|------------|-------------|
| 10/22/2013 5:00  | 0.0508 | 264.3984552 | 264.3809728 | 264.385048 | 264.408664 | 264.3897664 |
| 10/22/2013 5:10  | 0.0508 | 264.3993696 | 264.3889728 | 264.382048 | 264.410664 | 264.3897664 |
| 10/22/2013 5:20  | 0.0508 | 264.3978456 | 264.3799728 | 264.382048 | 264.410664 | 264.3887664 |
| 10/22/2013 5:30  | 0.0508 | 264.3978456 | 264.3849728 | 264.382048 | 264.410664 | 264.3887664 |
| 10/22/2013 5:40  | 0.0508 | 264.3975408 | 264.3799728 | 264.381048 | 264.410664 | 264.3887664 |
| 10/22/2013 5:50  | 0.0508 | 264.3969312 | 264.3799728 | 264.379048 | 264.408664 | 264.3887664 |
| 10/22/2013 6:00  | 0.0508 | 264.3969312 | 264.3829728 | 264.381048 | 264.409664 | 264.3897664 |
| 10/22/2013 6:10  | 0.0508 | 264.39876   | 264.3859728 | 264.381048 | 264.409664 | 264.3887664 |
| 10/22/2013 6:20  | 0.0508 | 264.3984552 | 264.3859728 | 264.381048 | 264.411664 | 264.3887664 |
| 10/22/2013 6:30  | 0.0508 | 264.4008936 | 264.3939728 | 264.382048 | 264.412664 | 264.3927664 |
| 10/22/2013 6:40  | 0.0508 | 264.4011984 | 264.3919728 | 264.382048 | 264.410664 | 264.3917664 |
| 10/22/2013 6:50  | 0.0508 | 264.4011984 | 264.3889728 | 264.382048 | 264.407664 | 264.3897664 |
| 10/22/2013 7:00  | 0.0508 | 264.403332  | 264.3939728 | 264.385048 | 264.406664 | 264.3907664 |
| 10/22/2013 7:10  | 0.0508 | 264.4030272 | 264.3919728 | 264.386048 | 264.408664 | 264.3907664 |
| 10/22/2013 7:20  | 0.0508 | 264.4054656 | 264.3989728 | 264.389048 | 264.408664 | 264.3927664 |
| 10/22/2013 7:30  | 0.0508 | 264.4075992 | 264.3999728 | 264.389048 | 264.406664 | 264.3927664 |
| 10/22/2013 7:40  | 0.0508 | 264.410952  | 264.4049728 | 264.393048 | 264.408664 | 264.3957664 |
| 10/22/2013 7:50  | 0.0508 | 264.4133904 | 264.4099728 | 264.396048 | 264.405664 | 264.3957664 |
| 10/22/2013 8:00  | 0.0508 | 264.4167432 | 264.4199728 | 264.401048 | 264.408664 | 264.4007664 |
| 10/22/2013 8:10  | 0.0508 | 264.4204008 | 264.4229728 | 264.404048 | 264.406664 | 264.4047664 |
| 10/22/2013 8:20  | 0.0508 | 264.4237536 | 264.4269728 | 264.405048 | 264.406664 | 264.4047664 |
| 10/22/2013 8:30  | 0.0508 | 264.427716  | 264.4349728 | 264.411048 | 264.408664 | 264.4077664 |
| 10/22/2013 8:40  | 0.0508 | 264.4316784 | 264.4419728 | 264.413048 | 264.407664 | 264.4097664 |
| 10/22/2013 8:50  | 0.0508 | 264.4341168 | 264.4399728 | 264.421048 | 264.409664 | 264.4147664 |
| 10/22/2013 9:00  | 0.0508 | 264.4365552 | 264.4429728 | 264.424048 | 264.409664 | 264.4147664 |
| 10/22/2013 9:10  | 0.0762 | 264.4386888 | 264.4469728 | 264.426048 | 264.407664 | 264.4177664 |
| 10/22/2013 9:20  | 0.0762 | 264.4408224 | 264.4469728 | 264.429048 | 264.409664 | 264.4187664 |
| 10/22/2013 9:30  | 0.0762 | 264.4438704 | 264.4509728 | 264.432048 | 264.410664 | 264.4207664 |
| 10/22/2013 9:40  | 0.0762 | 264.44448   | 264.4469728 | 264.433048 | 264.408664 | 264.4197664 |
| 10/22/2013 9:50  | 0.0762 | 264.4466136 | 264.4539728 | 264.437048 | 264.412664 | 264.4227664 |
| 10/22/2013 10:00 | 0.0762 | 264.4463088 | 264.4479728 | 264.438048 | 264.410664 | 264.4227664 |
| 10/22/2013 10:10 | 0.0762 | 264.447528  | 264.4539728 | 264.443048 | 264.413664 | 264.4247664 |
| 10/22/2013 10:20 | 0.0762 | 264.4466136 | 264.4459728 | 264.441048 | 264.411664 | 264.4237664 |
| 10/22/2013 10:30 | 0.0762 | 264.4481376 | 264.4509728 | 264.443048 | 264.411664 | 264.4257664 |
| 10/22/2013 10:40 | 0.0762 | 264.4472232 | 264.4469728 | 264.442048 | 264.410664 | 264.4227664 |
| 10/22/2013 10:50 | 0.0762 | 264.4481376 | 264.4499728 | 264.444048 | 264.411664 | 264.4237664 |
| 10/22/2013 11:00 | 0.0762 | 264.446004  | 264.4389728 | 264.441048 | 264.410664 | 264.4217664 |
| 10/22/2013 11:10 | 0.1016 | 264.446004  | 264.4469728 | 264.442048 | 264.410664 | 264.4247664 |
| 10/22/2013 11:20 | 0.1016 | 264.4438704 | 264.4409728 | 264.441048 | 264.412664 | 264.4227664 |
| 10/22/2013 11:30 | 0.1016 | 264.4438704 | 264.4409728 | 264.441048 | 264.413664 | 264.4247664 |
| 10/22/2013 11:40 | 0.1016 | 264.441432  | 264.4339728 | 264.435048 | 264.412664 | 264.4187664 |
| 10/22/2013 11:50 | 0.127  | 264.4417368 | 264.4369728 | 264.434048 | 264.409664 | 264.4197664 |
| 10/22/2013 12:00 | 0.127  | 264.439908  | 264.4319728 | 264.436048 | 264.412664 | 264.4197664 |
| 10/22/2013 12:10 | 0.127  | 264.439908  | 264.4339728 | 264.434048 | 264.411664 | 264.4197664 |
| 10/22/2013 12:20 | 0.1524 | 264.4380792 | 264.4319728 | 264.434048 | 264.412664 | 264.4207664 |
| 10/22/2013 12:30 | 0.1524 | 264.4374696 | 264.4289728 | 264.433048 | 264.414664 | 264.4217664 |
| 10/22/2013 12:40 | 0.1524 | 264.4374696 | 264.4329728 | 264.430048 | 264.410664 | 264.4187664 |

|                  |        |             |             |            |            |             |
|------------------|--------|-------------|-------------|------------|------------|-------------|
| 10/22/2013 12:50 | 0.1524 | 264.4365552 | 264.4309728 | 264.430048 | 264.413664 | 264.4197664 |
| 10/22/2013 13:00 | 0.1524 | 264.4371648 | 264.4309728 | 264.430048 | 264.413664 | 264.4207664 |
| 10/22/2013 13:10 | 0.1778 | 264.4356408 | 264.4309728 | 264.430048 | 264.413664 | 264.4187664 |
| 10/22/2013 13:20 | 0.1778 | 264.4350312 | 264.4239728 | 264.426048 | 264.409664 | 264.4157664 |
| 10/22/2013 13:30 | 0.2032 | 264.4350312 | 264.4309728 | 264.426048 | 264.410664 | 264.4177664 |
| 10/22/2013 13:40 | 0.2286 | 264.4332024 | 264.4239728 | 264.426048 | 264.409664 | 264.4137664 |
| 10/22/2013 13:50 | 0.2286 | 264.4350312 | 264.4339728 | 264.424048 | 264.409664 | 264.4177664 |
| 10/22/2013 14:00 | 0.2286 | 264.4347264 | 264.4269728 | 264.424048 | 264.411664 | 264.4157664 |
| 10/22/2013 14:10 | 0.2286 | 264.4356408 | 264.4339728 | 264.426048 | 264.411664 | 264.4177664 |
| 10/22/2013 14:20 | 0.2286 | 264.4347264 | 264.4269728 | 264.426048 | 264.411664 | 264.4177664 |
| 10/22/2013 14:30 | 0.254  | 264.4362504 | 264.4349728 | 264.427048 | 264.413664 | 264.4207664 |
| 10/22/2013 14:40 | 0.254  | 264.4347264 | 264.4289728 | 264.429048 | 264.415664 | 264.4197664 |
| 10/22/2013 14:50 | 0.254  | 264.435336  | 264.4319728 | 264.427048 | 264.410664 | 264.4197664 |
| 10/22/2013 15:00 | 0.2794 | 264.4341168 | 264.4289728 | 264.427048 | 264.410664 | 264.4187664 |
| 10/22/2013 15:10 | 0.2794 | 264.4347264 | 264.4259728 | 264.427048 | 264.412664 | 264.4207664 |
| 10/22/2013 15:20 | 0.2794 | 264.4347264 | 264.4309728 | 264.426048 | 264.414664 | 264.4207664 |
| 10/22/2013 15:30 | 0.2794 | 264.432288  | 264.4249728 | 264.424048 | 264.414664 | 264.4177664 |
| 10/22/2013 15:40 | 0.2794 | 264.4258872 | 264.4249728 | 264.421048 | 264.412664 | 264.4167664 |
| 10/22/2013 15:50 | 0.2794 | 264.4310688 | 264.4189728 | 264.423048 | 264.414664 | 264.4127664 |
| 10/22/2013 16:00 | 0.2794 | 264.4325928 | 264.4289728 | 264.424048 | 264.415664 | 264.4197664 |
| 10/22/2013 16:10 | 0.2794 | 264.430764  | 264.4219728 | 264.423048 | 264.414664 | 264.4167664 |
| 10/22/2013 16:20 | 0.2794 | 264.4316784 | 264.4239728 | 264.423048 | 264.414664 | 264.4167664 |
| 10/22/2013 16:30 | 0.2794 | 264.4304592 | 264.4229728 | 264.418048 | 264.415664 | 264.4157664 |
| 10/22/2013 16:40 | 0.2794 | 264.430764  | 264.4229728 | 264.423048 | 264.415664 | 264.4157664 |
| 10/22/2013 16:50 | 0.2794 | 264.4313736 | 264.4249728 | 264.420048 | 264.414664 | 264.4147664 |
| 10/22/2013 17:00 | 0.2794 | 264.4298496 | 264.4189728 | 264.420048 | 264.412664 | 264.4147664 |
| 10/22/2013 17:10 | 0.2794 | 264.4313736 | 264.4249728 | 264.420048 | 264.414664 | 264.4187664 |
| 10/22/2013 17:20 | 0.2794 | 264.4301544 | 264.4239728 | 264.420048 | 264.412664 | 264.4167664 |
| 10/22/2013 17:30 | 0.2794 | 264.4295448 | 264.4189728 | 264.421048 | 264.414664 | 264.4167664 |
| 10/22/2013 17:40 | 0.2794 | 264.4313736 | 264.4239728 | 264.417048 | 264.411664 | 264.4137664 |
| 10/22/2013 17:50 | 0.2794 | 264.430764  | 264.4239728 | 264.418048 | 264.413664 | 264.4137664 |
| 10/22/2013 18:00 | 0.2794 | 264.4325928 | 264.4279728 | 264.420048 | 264.413664 | 264.4157664 |
| 10/22/2013 18:10 | 0.2794 | 264.4332024 | 264.4309728 | 264.421048 | 264.411664 | 264.4177664 |
| 10/22/2013 18:20 | 0.2794 | 264.4335072 | 264.4279728 | 264.420048 | 264.411664 | 264.4157664 |
| 10/22/2013 18:30 | 0.2794 | 264.4356408 | 264.4339728 | 264.422048 | 264.413664 | 264.4187664 |
| 10/22/2013 18:40 | 0.2794 | 264.4359456 | 264.4339728 | 264.421048 | 264.413664 | 264.4197664 |
| 10/22/2013 18:50 | 0.2794 | 264.438384  | 264.4369728 | 264.425048 | 264.413664 | 264.4227664 |
| 10/22/2013 19:00 | 0.2794 | 264.4392984 | 264.4369728 | 264.428048 | 264.415664 | 264.4207664 |
| 10/22/2013 19:10 | 0.2794 | 264.4417368 | 264.4439728 | 264.428048 | 264.413664 | 264.4247664 |
| 10/22/2013 19:20 | 0.2794 | 264.4408224 | 264.4379728 | 264.431048 | 264.413664 | 264.4227664 |
| 10/22/2013 19:30 | 0.2794 | 264.4426512 | 264.4439728 | 264.431048 | 264.415664 | 264.4227664 |
| 10/22/2013 19:40 | 0.2794 | 264.4426512 | 264.4409728 | 264.433048 | 264.415664 | 264.4247664 |
| 10/22/2013 19:50 | 0.2794 | 264.4438704 | 264.4429728 | 264.432048 | 264.414664 | 264.4247664 |
| 10/22/2013 20:00 | 0.2794 | 264.4441752 | 264.4429728 | 264.434048 | 264.416664 | 264.4267664 |
| 10/22/2013 20:10 | 0.2794 | 264.4456992 | 264.4459728 | 264.436048 | 264.415664 | 264.4267664 |
| 10/22/2013 20:20 | 0.2794 | 264.4466136 | 264.4479728 | 264.437048 | 264.416664 | 264.4287664 |
| 10/22/2013 20:30 | 0.2794 | 264.447528  | 264.4469728 | 264.437048 | 264.413664 | 264.4287664 |

|                  |        |             |             |            |            |             |
|------------------|--------|-------------|-------------|------------|------------|-------------|
| 10/22/2013 20:40 | 0.2794 | 264.4487472 | 264.4519728 | 264.440048 | 264.413664 | 264.4287664 |
| 10/22/2013 20:50 | 0.2794 | 264.4496616 | 264.4499728 | 264.441048 | 264.414664 | 264.4297664 |
| 10/22/2013 21:00 | 0.2794 | 264.4508808 | 264.4519728 | 264.442048 | 264.414664 | 264.4307664 |
| 10/22/2013 21:10 | 0.2794 | 264.4517952 | 264.4539728 | 264.444048 | 264.416664 | 264.4307664 |
| 10/22/2013 21:20 | 0.2794 | 264.4527096 | 264.4559728 | 264.444048 | 264.412664 | 264.4317664 |
| 10/22/2013 21:30 | 0.2794 | 264.4530144 | 264.4539728 | 264.446048 | 264.413664 | 264.4297664 |
| 10/22/2013 21:40 | 0.2794 | 264.453624  | 264.4539728 | 264.448048 | 264.415664 | 264.4297664 |
| 10/22/2013 21:50 | 0.2794 | 264.4545384 | 264.4539728 | 264.449048 | 264.415664 | 264.4337664 |
| 10/22/2013 22:00 | 0.2794 | 264.4554528 | 264.4559728 | 264.447048 | 264.413664 | 264.4317664 |
| 10/22/2013 22:10 | 0.2794 | 264.4557576 | 264.4549728 | 264.449048 | 264.415664 | 264.4327664 |
| 10/22/2013 22:20 | 0.2794 | 264.4557576 | 264.4529728 | 264.450048 | 264.414664 | 264.4337664 |
| 10/22/2013 22:30 | 0.2794 | 264.4560624 | 264.4559728 | 264.452048 | 264.417664 | 264.4337664 |
| 10/22/2013 22:40 | 0.2794 | 264.4563672 | 264.4549728 | 264.450048 | 264.417664 | 264.4327664 |
| 10/22/2013 22:50 | 0.2794 | 264.4560624 | 264.4529728 | 264.450048 | 264.417664 | 264.4327664 |
| 10/22/2013 23:00 | 0.2794 | 264.4560624 | 264.4539728 | 264.450048 | 264.417664 | 264.4337664 |
| 10/22/2013 23:10 | 0.2794 | 264.4554528 | 264.4509728 | 264.450048 | 264.415664 | 264.4327664 |
| 10/22/2013 23:20 | 0.2794 | 264.4542336 | 264.4499728 | 264.449048 | 264.417664 | 264.4327664 |
| 10/22/2013 23:30 | 0.2794 | 264.4530144 | 264.4449728 | 264.446048 | 264.414664 | 264.4307664 |
| 10/22/2013 23:40 | 0.2794 | 264.4517952 | 264.4449728 | 264.447048 | 264.415664 | 264.4307664 |
| 10/22/2013 23:50 | 0.2794 | 264.4499664 | 264.4399728 | 264.445048 | 264.415664 | 264.4307664 |
| 10/23/2013 0:00  | 0.2794 | 264.4484424 | 264.4409728 | 264.444048 | 264.418664 | 264.4307664 |
| 10/23/2013 0:10  | 0      | 264.4466136 | 264.4389728 | 264.445048 | 264.420664 | 264.4317664 |
| 10/23/2013 0:20  | 0      | 264.4450896 | 264.4329728 | 264.439048 | 264.417664 | 264.4267664 |
| 10/23/2013 0:30  | 0      | 264.4435656 | 264.4319728 | 264.438048 | 264.417664 | 264.4257664 |
| 10/23/2013 0:40  | 0      | 264.4417368 | 264.4289728 | 264.437048 | 264.417664 | 264.4257664 |
| 10/23/2013 0:50  | 0      | 264.4402128 | 264.4269728 | 264.434048 | 264.417664 | 264.4237664 |
| 10/23/2013 1:00  | 0      | 264.4374696 | 264.4209728 | 264.430048 | 264.417664 | 264.4227664 |
| 10/23/2013 1:10  | 0      | 264.43686   | 264.4219728 | 264.430048 | 264.415664 | 264.4207664 |
| 10/23/2013 1:20  | 0      | 264.435336  | 264.4219728 | 264.429048 | 264.416664 | 264.4207664 |
| 10/23/2013 1:30  | 0      | 264.4319832 | 264.4119728 | 264.428048 | 264.417664 | 264.4167664 |
| 10/23/2013 1:40  | 0      | 264.4325928 | 264.4219728 | 264.425048 | 264.417664 | 264.4187664 |
| 10/23/2013 1:50  | 0      | 264.4289352 | 264.4119728 | 264.424048 | 264.417664 | 264.4147664 |
| 10/23/2013 2:00  | 0      | 264.4301544 | 264.4179728 | 264.420048 | 264.416664 | 264.4177664 |
| 10/23/2013 2:10  | 0      | 264.4264968 | 264.4079728 | 264.418048 | 264.418664 | 264.4147664 |
| 10/23/2013 2:20  | 0      | 264.4249728 | 264.4049728 | 264.416048 | 264.416664 | 264.4117664 |
| 10/23/2013 2:30  | 0      | 264.4243632 | 264.4099728 | 264.414048 | 264.416664 | 264.4127664 |
| 10/23/2013 2:40  | 0      | 264.4228392 | 264.4099728 | 264.412048 | 264.416664 | 264.4127664 |
| 10/23/2013 2:50  | 0      | 264.420096  | 264.3979728 | 264.410048 | 264.419664 | 264.4107664 |
| 10/23/2013 3:00  | 0      | 264.4188768 | 264.3999728 | 264.406048 | 264.414664 | 264.4077664 |
| 10/23/2013 3:10  | 0      | 264.4179624 | 264.4039728 | 264.405048 | 264.416664 | 264.4077664 |
| 10/23/2013 3:20  | 0      | 264.4173528 | 264.4029728 | 264.406048 | 264.416664 | 264.4057664 |
| 10/23/2013 3:30  | 0      | 264.4158288 | 264.3969728 | 264.403048 | 264.414664 | 264.4047664 |
| 10/23/2013 3:40  | 0      | 264.4152192 | 264.3989728 | 264.401048 | 264.415664 | 264.4037664 |
| 10/23/2013 3:50  | 0      | 264.4143048 | 264.3959728 | 264.401048 | 264.413664 | 264.4037664 |
| 10/23/2013 4:00  | 0      | 264.4127808 | 264.3949728 | 264.401048 | 264.416664 | 264.4027664 |
| 10/23/2013 4:10  | 0      | 264.4130856 | 264.3999728 | 264.398048 | 264.415664 | 264.4037664 |
| 10/23/2013 4:20  | 0      | 264.410952  | 264.3939728 | 264.398048 | 264.416664 | 264.4007664 |

|                  |   |             |             |            |            |             |
|------------------|---|-------------|-------------|------------|------------|-------------|
| 10/23/2013 4:30  | 0 | 264.4118664 | 264.3969728 | 264.395048 | 264.413664 | 264.3997664 |
| 10/23/2013 4:40  | 0 | 264.4100376 | 264.3919728 | 264.397048 | 264.414664 | 264.3997664 |
| 10/23/2013 4:50  | 0 | 264.4097328 | 264.3929728 | 264.393048 | 264.412664 | 264.3987664 |
| 10/23/2013 5:00  | 0 | 264.4091232 | 264.3939728 | 264.393048 | 264.413664 | 264.3987664 |
| 10/23/2013 5:10  | 0 | 264.4088184 | 264.3909728 | 264.394048 | 264.413664 | 264.3977664 |
| 10/23/2013 5:20  | 0 | 264.4075992 | 264.3929728 | 264.393048 | 264.417664 | 264.3987664 |
| 10/23/2013 5:30  | 0 | 264.4075992 | 264.3939728 | 264.391048 | 264.414664 | 264.3957664 |
| 10/23/2013 5:40  | 0 | 264.4072944 | 264.3909728 | 264.389048 | 264.409664 | 264.3957664 |
| 10/23/2013 5:50  | 0 | 264.4082088 | 264.3979728 | 264.391048 | 264.414664 | 264.3987664 |
| 10/23/2013 6:00  | 0 | 264.40638   | 264.3909728 | 264.390048 | 264.412664 | 264.3957664 |
| 10/23/2013 6:10  | 0 | 264.40638   | 264.3959728 | 264.393048 | 264.415664 | 264.3987664 |
| 10/23/2013 6:20  | 0 | 264.4069896 | 264.3919728 | 264.388048 | 264.411664 | 264.3947664 |
| 10/23/2013 6:30  | 0 | 264.4085136 | 264.3989728 | 264.388048 | 264.412664 | 264.3967664 |
| 10/23/2013 6:40  | 0 | 264.4112568 | 264.4019728 | 264.391048 | 264.410664 | 264.3987664 |
| 10/23/2013 6:50  | 0 | 264.4115616 | 264.4019728 | 264.392048 | 264.410664 | 264.3987664 |
| 10/23/2013 7:00  | 0 | 264.410952  | 264.3999728 | 264.394048 | 264.412664 | 264.3987664 |
| 10/23/2013 7:10  | 0 | 264.4130856 | 264.4039728 | 264.394048 | 264.410664 | 264.3987664 |
| 10/23/2013 7:20  | 0 | 264.4149144 | 264.4079728 | 264.395048 | 264.413664 | 264.3997664 |
| 10/23/2013 7:30  | 0 | 264.4167432 | 264.4089728 | 264.394048 | 264.407664 | 264.3987664 |
| 10/23/2013 7:40  | 0 | 264.4191816 | 264.4149728 | 264.399048 | 264.412664 | 264.4037664 |
| 10/23/2013 7:50  | 0 | 264.4207056 | 264.4149728 | 264.403048 | 264.412664 | 264.3997664 |
| 10/23/2013 8:00  | 0 | 264.423144  | 264.4199728 | 264.406048 | 264.412664 | 264.3927664 |
| 10/23/2013 8:10  | 0 | 264.4271064 | 264.4289728 | 264.408048 | 264.409664 | 264.3787664 |
| 10/23/2013 8:20  | 0 | 264.4304592 | 264.4319728 | 264.412048 | 264.409664 | 264.3807664 |
| 10/23/2013 8:30  | 0 | 264.433812  | 264.4399728 | 264.417048 | 264.413664 | 264.3957664 |
| 10/23/2013 8:40  | 0 | 264.4365552 | 264.4439728 | 264.419048 | 264.410664 | 264.4097664 |
| 10/23/2013 8:50  | 0 | 264.4389936 | 264.4409728 | 264.423048 | 264.412664 | 264.4117664 |
| 10/23/2013 9:00  | 0 | 264.4423464 | 264.4499728 | 264.429048 | 264.413664 | 264.4137664 |
| 10/23/2013 9:10  | 0 | 264.44448   | 264.4529728 | 264.430048 | 264.411664 | 264.4177664 |
| 10/23/2013 9:20  | 0 | 264.446004  | 264.4529728 | 264.436048 | 264.412664 | 264.4207664 |
| 10/23/2013 9:30  | 0 | 264.4496616 | 264.4599728 | 264.440048 | 264.411664 | 264.4227664 |
| 10/23/2013 9:40  | 0 | 264.4502712 | 264.4549728 | 264.440048 | 264.412664 | 264.4227664 |
| 10/23/2013 9:50  | 0 | 264.4508808 | 264.4539728 | 264.442048 | 264.412664 | 264.4217664 |
| 10/23/2013 10:00 | 0 | 264.4530144 | 264.4619728 | 264.445048 | 264.414664 | 264.4247664 |
| 10/23/2013 10:10 | 0 | 264.4524048 | 264.4539728 | 264.446048 | 264.412664 | 264.4247664 |
| 10/23/2013 10:20 | 0 | 264.4542336 | 264.4569728 | 264.447048 | 264.412664 | 264.4267664 |
| 10/23/2013 10:30 | 0 | 264.453624  | 264.4549728 | 264.449048 | 264.413664 | 264.4297664 |
| 10/23/2013 10:40 | 0 | 264.4548432 | 264.4599728 | 264.449048 | 264.412664 | 264.4297664 |
| 10/23/2013 10:50 | 0 | 264.455148  | 264.4619728 | 264.452048 | 264.415664 | 264.4327664 |
| 10/23/2013 11:00 | 0 | 264.456672  | 264.4619728 | 264.450048 | 264.413664 | 264.4317664 |
| 10/23/2013 11:10 | 0 | 264.4554528 | 264.4549728 | 264.453048 | 264.416664 | 264.4317664 |
| 10/23/2013 11:20 | 0 | 264.4539288 | 264.4519728 | 264.452048 | 264.413664 | 264.4297664 |
| 10/23/2013 11:30 | 0 | 264.4527096 | 264.4529728 | 264.453048 | 264.416664 | 264.4327664 |
| 10/23/2013 11:40 | 0 | 264.4517952 | 264.4499728 | 264.449048 | 264.413664 | 264.4297664 |
| 10/23/2013 11:50 | 0 | 264.4502712 | 264.4449728 | 264.450048 | 264.414664 | 264.4287664 |
| 10/23/2013 12:00 | 0 | 264.4502712 | 264.4499728 | 264.448048 | 264.414664 | 264.4277664 |
| 10/23/2013 12:10 | 0 | 264.4478328 | 264.4399728 | 264.445048 | 264.415664 | 264.4257664 |

|                  |        |             |             |            |            |             |
|------------------|--------|-------------|-------------|------------|------------|-------------|
| 10/23/2013 12:20 | 0      | 264.4481376 | 264.4249728 | 264.445048 | 264.417664 | 264.4287664 |
| 10/23/2013 12:30 | 0      | 264.446004  | 264.4199728 | 264.480048 | 264.417664 | 264.4267664 |
| 10/23/2013 12:40 | 0      | 264.4453944 | 264.4199728 | 264.442048 | 264.417664 | 264.4287664 |
| 10/23/2013 12:50 | 0      | 264.444448  | 264.4199728 | 264.437048 | 264.415664 | 264.4247664 |
| 10/23/2013 13:00 | 0      | 264.4420416 | 264.4329728 | NA         | 264.415664 | 264.4247664 |
| 10/23/2013 13:10 | 0      | 264.4420416 | 264.4389728 | NA         | 264.416664 | 264.4267664 |
| 10/23/2013 13:20 | 0      | 264.441432  | 264.4409728 | NA         | 264.415664 | 264.4247664 |
| 10/23/2013 13:30 | 0      | 264.439908  | 264.4329728 | NA         | 264.415664 | 264.4237664 |
| 10/23/2013 13:40 | 0      | 264.4411272 | 264.4419728 | NA         | 264.414664 | 264.4237664 |
| 10/23/2013 13:50 | 0      | 264.4396032 | 264.4349728 | NA         | 264.415664 | 264.4257664 |
| 10/23/2013 14:00 | 0      | 264.4405176 | 264.4419728 | NA         | 264.414664 | 264.4257664 |
| 10/23/2013 14:10 | 0      | 264.4389936 | 264.4389728 | NA         | 264.416664 | 264.4237664 |
| 10/23/2013 14:20 | 0.0254 | 264.438384  | 264.4319728 | NA         | 264.416664 | 264.4237664 |
| 10/23/2013 14:30 | 0.0254 | 264.4389936 | 264.4389728 | NA         | 264.415664 | 264.4237664 |
| 10/23/2013 14:40 | 0.0508 | 264.4377744 | 264.4329728 | NA         | 264.417664 | 264.4237664 |
| 10/23/2013 14:50 | 0.0508 | 264.4386888 | 264.4369728 | NA         | 264.415664 | 264.4237664 |
| 10/23/2013 15:00 | 0.0508 | 264.4362504 | 264.4329728 | 264.365048 | 264.417664 | 264.4217664 |
| 10/23/2013 15:10 | 0.0508 | 264.435336  | 264.4279728 | 264.387048 | 264.416664 | 264.4197664 |
| 10/23/2013 15:20 | 0.0508 | 264.4362504 | 264.4349728 | 264.404048 | 264.417664 | 264.4237664 |
| 10/23/2013 15:30 | 0.0508 | 264.4344216 | 264.4269728 | 264.410048 | 264.417664 | 264.4207664 |
| 10/23/2013 15:40 | 0.0508 | 264.4347264 | 264.4309728 | 264.416048 | 264.418664 | 264.4207664 |
| 10/23/2013 15:50 | 0.0508 | 264.4341168 | 264.4309728 | 264.420048 | 264.416664 | 264.4177664 |
| 10/23/2013 16:00 | 0.0508 | 264.4319832 | 264.4239728 | 264.420048 | 264.416664 | 264.4177664 |
| 10/23/2013 16:10 | 0.0508 | 264.4335072 | 264.4319728 | 264.424048 | 264.418664 | 264.4207664 |
| 10/23/2013 16:20 | 0.0508 | 264.4316784 | 264.4259728 | 264.421048 | 264.416664 | 264.4177664 |
| 10/23/2013 16:30 | 0.0508 | 264.430764  | 264.4229728 | 264.424048 | 264.416664 | 264.4157664 |
| 10/23/2013 16:40 | 0.0508 | 264.4328976 | 264.4349728 | 264.425048 | 264.418664 | 264.4207664 |
| 10/23/2013 16:50 | 0.0508 | 264.4313736 | 264.4249728 | 264.424048 | 264.416664 | 264.4177664 |
| 10/23/2013 17:00 | 0.0508 | 264.4325928 | 264.4289728 | 264.424048 | 264.415664 | 264.4177664 |
| 10/23/2013 17:10 | 0.0508 | 264.432288  | 264.4309728 | 264.422048 | 264.413664 | 264.4167664 |
| 10/23/2013 17:20 | 0.0508 | 264.430764  | 264.4229728 | 264.422048 | 264.413664 | 264.4187664 |
| 10/23/2013 17:30 | 0.0508 | 264.4325928 | 264.4309728 | 264.424048 | 264.415664 | 264.4197664 |
| 10/23/2013 17:40 | 0.0508 | 264.4304592 | 264.4249728 | 264.421048 | 264.416664 | 264.4167664 |
| 10/23/2013 17:50 | 0.0508 | 264.4298496 | 264.4239728 | 264.420048 | 264.416664 | 264.4157664 |
| 10/23/2013 18:00 | 0.0508 | 264.4310688 | 264.4299728 | 264.425048 | 264.415664 | 264.4187664 |
| 10/23/2013 18:10 | 0.0508 | 264.4304592 | 264.4269728 | 264.421048 | 264.416664 | 264.4167664 |
| 10/23/2013 18:20 | 0.0508 | 264.42924   | 264.4209728 | 264.421048 | 264.414664 | 264.4177664 |
| 10/23/2013 18:30 | 0.0508 | 264.4316784 | 264.4289728 | 264.421048 | 264.415664 | 264.4177664 |
| 10/23/2013 18:40 | 0.0508 | 264.4313736 | 264.4289728 | 264.421048 | 264.415664 | 264.4157664 |
| 10/23/2013 18:50 | 0.0508 | 264.4310688 | 264.4239728 | 264.422048 | 264.415664 | 264.4177664 |
| 10/23/2013 19:00 | 0.0508 | 264.4335072 | 264.4359728 | 264.424048 | 264.415664 | 264.4177664 |
| 10/23/2013 19:10 | 0.0508 | 264.4335072 | 264.4319728 | 264.424048 | 264.415664 | 264.4177664 |
| 10/23/2013 19:20 | 0.0508 | 264.4356408 | 264.4369728 | 264.430048 | 264.415664 | 264.4217664 |
| 10/23/2013 19:30 | 0.0508 | 264.4374696 | 264.4389728 | 264.426048 | 264.414664 | 264.4207664 |
| 10/23/2013 19:40 | 0.0508 | 264.4402128 | 264.4439728 | 264.434048 | 264.417664 | 264.4247664 |
| 10/23/2013 19:50 | 0.0762 | 264.4411272 | 264.4449728 | 264.437048 | 264.416664 | 264.4257664 |
| 10/23/2013 20:00 | 0.0762 | 264.4420416 | 264.4449728 | 264.437048 | 264.414664 | 264.4237664 |

|                  |        |             |             |            |            |             |
|------------------|--------|-------------|-------------|------------|------------|-------------|
| 10/23/2013 20:10 | 0.0762 | 264.4423464 | 264.4449728 | 264.437048 | 264.416664 | 264.4257664 |
| 10/23/2013 20:20 | 0.0762 | 264.442956  | 264.4429728 | 264.438048 | 264.413664 | 264.4227664 |
| 10/23/2013 20:30 | 0.0762 | 264.4438704 | 264.4489728 | 264.440048 | 264.416664 | 264.4287664 |
| 10/23/2013 20:40 | 0.0762 | 264.4447848 | 264.4469728 | 264.441048 | 264.413664 | 264.4257664 |
| 10/23/2013 20:50 | 0.0762 | 264.446004  | 264.4479728 | 264.441048 | 264.415664 | 264.4277664 |
| 10/23/2013 21:00 | 0.0762 | 264.4469184 | 264.4479728 | 264.442048 | 264.413664 | 264.4277664 |
| 10/23/2013 21:10 | 0.0762 | 264.447528  | 264.4499728 | 264.443048 | 264.415664 | 264.4277664 |
| 10/23/2013 21:20 | 0.0762 | 264.4481376 | 264.4509728 | 264.443048 | 264.414664 | 264.4267664 |
| 10/23/2013 21:30 | 0.0762 | 264.4493568 | 264.4519728 | 264.446048 | 264.418664 | 264.4297664 |
| 10/23/2013 21:40 | 0.0762 | 264.449052  | 264.4539728 | 264.446048 | 264.414664 | 264.4297664 |
| 10/23/2013 21:50 | 0.0762 | 264.4502712 | 264.4529728 | 264.445048 | 264.415664 | 264.4307664 |
| 10/23/2013 22:00 | 0.0762 | 264.4511856 | 264.4559728 | 264.446048 | 264.415664 | 264.4287664 |
| 10/23/2013 22:10 | 0.0762 | 264.4517952 | 264.4589728 | 264.451048 | 264.418664 | 264.4357664 |
| 10/23/2013 22:20 | 0.0762 | 264.4521    | 264.4579728 | 264.449048 | 264.417664 | 264.4327664 |
| 10/23/2013 22:30 | 0.0762 | 264.4521    | 264.4529728 | 264.449048 | 264.417664 | 264.4307664 |
| 10/23/2013 22:40 | 0.0762 | 264.4517952 | 264.4529728 | 264.449048 | 264.416664 | 264.4327664 |
| 10/23/2013 22:50 | 0.0762 | 264.4511856 | 264.4519728 | 264.449048 | 264.417664 | 264.4327664 |
| 10/23/2013 23:00 | 0.0762 | 264.4511856 | 264.4519728 | 264.447048 | 264.416664 | 264.4317664 |
| 10/23/2013 23:10 | 0.0762 | 264.4508808 | 264.4539728 | 264.447048 | 264.416664 | 264.4337664 |
| 10/23/2013 23:20 | 0.0762 | 264.450576  | 264.4549728 | 264.449048 | 264.419664 | 264.4347664 |
| 10/23/2013 23:30 | 0.0762 | 264.4496616 | 264.4499728 | 264.447048 | 264.417664 | 264.4327664 |
| 10/23/2013 23:40 | 0.0762 | 264.4484424 | 264.4499728 | 264.446048 | 264.417664 | 264.4327664 |
| 10/23/2013 23:50 | 0.0762 | 264.447528  | 264.4439728 | 264.441048 | 264.416664 | 264.4297664 |
| 10/24/2013 0:00  | 0.0762 | 264.446004  | 264.4419728 | 264.441048 | 264.416664 | 264.4307664 |
| 10/24/2013 0:10  | 0      | 264.44448   | 264.4419728 | 264.438048 | 264.416664 | 264.4287664 |
| 10/24/2013 0:20  | 0      | 264.442956  | 264.4369728 | 264.438048 | 264.416664 | 264.4307664 |
| 10/24/2013 0:30  | 0      | 264.4411272 | 264.4309728 | 264.434048 | 264.415664 | 264.4277664 |
| 10/24/2013 0:40  | 0      | 264.438384  | 264.4279728 | 264.433048 | 264.416664 | 264.4247664 |
| 10/24/2013 0:50  | 0      | 264.4365552 | 264.4289728 | 264.427048 | 264.418664 | 264.4237664 |
| 10/24/2013 1:00  | 0      | 264.4335072 | 264.4239728 | 264.426048 | 264.418664 | 264.4197664 |
| 10/24/2013 1:10  | 0      | 264.4350312 | 264.4309728 | 264.423048 | 264.417664 | 264.4217664 |
| 10/24/2013 1:20  | 0      | 264.4310688 | 264.4159728 | 264.422048 | 264.417664 | 264.4187664 |
| 10/24/2013 1:30  | 0      | 264.4310688 | 264.4259728 | 264.420048 | 264.418664 | 264.4207664 |
| 10/24/2013 1:40  | 0      | 264.4274112 | 264.4159728 | 264.418048 | 264.418664 | 264.4187664 |
| 10/24/2013 1:50  | 0      | 264.4274112 | 264.4149728 | 264.415048 | 264.416664 | 264.4177664 |
| 10/24/2013 2:00  | 0      | 264.424668  | 264.4159728 | 264.412048 | 264.417664 | 264.4157664 |
| 10/24/2013 2:10  | 0      | 264.4219248 | 264.4039728 | 264.410048 | 264.414664 | 264.4107664 |
| 10/24/2013 2:20  | 0      | 264.423144  | 264.4169728 | 264.410048 | 264.416664 | 264.4127664 |
| 10/24/2013 2:30  | 0      | 264.4194864 | 264.4079728 | 264.406048 | 264.416664 | 264.4117664 |
| 10/24/2013 2:40  | 0      | 264.4173528 | 264.4009728 | 264.403048 | 264.417664 | 264.4087664 |
| 10/24/2013 2:50  | 0      | 264.415524  | 264.3979728 | 264.403048 | 264.415664 | 264.4087664 |
| 10/24/2013 3:00  | 0      | 264.4143048 | 264.3999728 | 264.400048 | 264.415664 | 264.4087664 |
| 10/24/2013 3:10  | 0      | 264.414     | 264.4029728 | 264.397048 | 264.416664 | 264.4067664 |
| 10/24/2013 3:20  | 0      | 264.412476  | 264.4029728 | 264.397048 | 264.416664 | 264.4057664 |
| 10/24/2013 3:30  | 0      | 264.4106472 | 264.3949728 | 264.398048 | 264.415664 | 264.4047664 |
| 10/24/2013 3:40  | 0      | 264.4103424 | 264.3969728 | 264.396048 | 264.416664 | 264.4057664 |
| 10/24/2013 3:50  | 0      | 264.410952  | 264.4029728 | 264.396048 | 264.415664 | 264.4047664 |

|                  |   |             |             |            |            |             |
|------------------|---|-------------|-------------|------------|------------|-------------|
| 10/24/2013 4:00  | 0 | 264.409428  | 264.3979728 | 264.393048 | 264.415664 | 264.3997664 |
| 10/24/2013 4:10  | 0 | 264.4082088 | 264.3959728 | 264.392048 | 264.413664 | 264.3997664 |
| 10/24/2013 4:20  | 0 | 264.4075992 | 264.3939728 | 264.391048 | 264.413664 | 264.3977664 |
| 10/24/2013 4:30  | 0 | 264.4066848 | 264.3959728 | 264.391048 | 264.413664 | 264.3977664 |
| 10/24/2013 4:40  | 0 | 264.4054656 | 264.3939728 | 264.391048 | 264.413664 | 264.3957664 |
| 10/24/2013 4:50  | 0 | 264.4039416 | 264.3879728 | 264.389048 | 264.414664 | 264.3947664 |
| 10/24/2013 5:00  | 0 | 264.4027224 | 264.3879728 | 264.386048 | 264.410664 | 264.3947664 |
| 10/24/2013 5:10  | 0 | 264.4030272 | 264.3919728 | 264.386048 | 264.411664 | 264.3937664 |
| 10/24/2013 5:20  | 0 | 264.4024176 | 264.3929728 | 264.390048 | 264.414664 | 264.3967664 |
| 10/24/2013 5:30  | 0 | 264.4008936 | 264.3869728 | 264.385048 | 264.410664 | 264.3927664 |
| 10/24/2013 5:40  | 0 | 264.401808  | 264.3939728 | 264.385048 | 264.410664 | 264.3947664 |
| 10/24/2013 5:50  | 0 | 264.400284  | 264.3889728 | 264.385048 | 264.412664 | 264.3937664 |
| 10/24/2013 6:00  | 0 | 264.3999792 | 264.3879728 | 264.385048 | 264.409664 | 264.3917664 |
| 10/24/2013 6:10  | 0 | 264.3999792 | 264.3899728 | 264.383048 | 264.410664 | 264.3907664 |
| 10/24/2013 6:20  | 0 | 264.4008936 | 264.3949728 | 264.385048 | 264.411664 | 264.3937664 |
| 10/24/2013 6:30  | 0 | 264.4008936 | 264.3919728 | 264.387048 | 264.412664 | 264.3937664 |
| 10/24/2013 6:40  | 0 | 264.4005888 | 264.3939728 | 264.387048 | 264.412664 | 264.3907664 |
| 10/24/2013 6:50  | 0 | 264.403332  | 264.3999728 | 264.387048 | 264.410664 | 264.3927664 |
| 10/24/2013 7:00  | 0 | 264.4036368 | 264.3969728 | 264.389048 | 264.409664 | 264.3927664 |
| 10/24/2013 7:10  | 0 | 264.4057704 | 264.4019728 | 264.389048 | 264.408664 | 264.3907664 |
| 10/24/2013 7:20  | 0 | 264.407904  | 264.4059728 | 264.393048 | 264.409664 | 264.3937664 |
| 10/24/2013 7:30  | 0 | 264.410952  | 264.4139728 | 264.398048 | 264.409664 | 264.3987664 |
| 10/24/2013 7:40  | 0 | 264.414     | 264.4189728 | 264.401048 | 264.411664 | 264.3987664 |
| 10/24/2013 7:50  | 0 | 264.4158288 | 264.4159728 | 264.406048 | 264.411664 | 264.4007664 |
| 10/24/2013 8:00  | 0 | 264.4191816 | 264.4229728 | 264.410048 | 264.409664 | 264.4027664 |
| 10/24/2013 8:10  | 0 | 264.4222296 | 264.4299728 | 264.411048 | 264.409664 | 264.4067664 |
| 10/24/2013 8:20  | 0 | 264.4264968 | 264.4359728 | 264.419048 | 264.411664 | 264.4107664 |
| 10/24/2013 8:30  | 0 | 264.4295448 | 264.4389728 | 264.422048 | 264.407664 | 264.4077664 |
| 10/24/2013 8:40  | 0 | 264.4325928 | 264.4419728 | 264.427048 | 264.407664 | 264.4097664 |
| 10/24/2013 8:50  | 0 | 264.43686   | 264.4509728 | 264.434048 | 264.408664 | 264.4157664 |
| 10/24/2013 9:00  | 0 | 264.439908  | 264.4559728 | 264.435048 | 264.409664 | 264.4177664 |
| 10/24/2013 9:10  | 0 | 264.4405176 | 264.4459728 | 264.439048 | 264.409664 | 264.4177664 |
| 10/24/2013 9:20  | 0 | 264.4423464 | 264.4509728 | 264.443048 | 264.409664 | 264.4177664 |
| 10/24/2013 9:30  | 0 | 264.4432608 | 264.4529728 | 264.442048 | 264.409664 | 264.4197664 |
| 10/24/2013 9:40  | 0 | 264.44448   | 264.4529728 | 264.444048 | 264.409664 | 264.4217664 |
| 10/24/2013 9:50  | 0 | 264.4469184 | 264.4609728 | 264.447048 | 264.412664 | 264.4247664 |
| 10/24/2013 10:00 | 0 | 264.450576  | 264.4629728 | 264.451048 | 264.410664 | 264.4287664 |
| 10/24/2013 10:10 | 0 | 264.453624  | 264.4709728 | 264.455048 | 264.410664 | 264.4297664 |
| 10/24/2013 10:20 | 0 | 264.4527096 | 264.4599728 | 264.456048 | 264.411664 | 264.4297664 |
| 10/24/2013 10:30 | 0 | 264.4533192 | 264.4589728 | 264.456048 | 264.410664 | 264.4287664 |
| 10/24/2013 10:40 | 0 | 264.4521    | 264.4569728 | 264.455048 | 264.410664 | 264.4287664 |
| 10/24/2013 10:50 | 0 | 264.4511856 | 264.4539728 | 264.452048 | 264.410664 | 264.4287664 |
| 10/24/2013 11:00 | 0 | 264.4508808 | 264.4539728 | 264.451048 | 264.409664 | 264.4287664 |
| 10/24/2013 11:10 | 0 | 264.4499664 | 264.4539728 | 264.448048 | 264.409664 | 264.4277664 |
| 10/24/2013 11:20 | 0 | 264.4472232 | 264.4449728 | 264.445048 | 264.411664 | 264.4247664 |
| 10/24/2013 11:30 | 0 | 264.447528  | 264.4489728 | 264.444048 | 264.412664 | 264.4257664 |
| 10/24/2013 11:40 | 0 | 264.446004  | 264.4439728 | 264.443048 | 264.409664 | 264.4247664 |



|                  |   |             |             |            |            |             |
|------------------|---|-------------|-------------|------------|------------|-------------|
| 10/24/2013 11:50 | 0 | 264.4456992 | 264.4459728 | 264.441048 | 264.409664 | 264.4257664 |
| 10/24/2013 12:00 | 0 | 264.444448  | 264.4449728 | 264.441048 | 264.411664 | 264.4257664 |
| 10/24/2013 12:10 | 0 | 264.4432608 | 264.4409728 | 264.440048 | 264.413664 | 264.4257664 |
| 10/24/2013 12:20 | 0 | 264.4435656 | 264.4449728 | 264.437048 | 264.411664 | 264.4247664 |
| 10/24/2013 12:30 | 0 | 264.4435656 | 264.4449728 | 264.437048 | 264.411664 | 264.4257664 |
| 10/24/2013 12:40 | 0 | 264.442956  | 264.4419728 | 264.436048 | 264.410664 | 264.4227664 |
| 10/24/2013 12:50 | 0 | 264.4417368 | 264.4379728 | 264.435048 | 264.408664 | 264.4217664 |
| 10/24/2013 13:00 | 0 | 264.4411272 | 264.4379728 | 264.436048 | 264.411664 | 264.4247664 |
| 10/24/2013 13:10 | 0 | 264.4402128 | 264.4379728 | 264.435048 | 264.412664 | 264.4257664 |
| 10/24/2013 13:20 | 0 | 264.4389936 | 264.4349728 | 264.432048 | 264.409664 | 264.4207664 |
| 10/24/2013 13:30 | 0 | 264.439908  | 264.4409728 | 264.434048 | 264.411664 | 264.4227664 |
| 10/24/2013 13:40 | 0 | 264.4386888 | 264.4379728 | 264.432048 | 264.412664 | 264.4237664 |
| 10/24/2013 13:50 | 0 | 264.4392984 | 264.4409728 | 264.434048 | 264.413664 | 264.4237664 |
| 10/24/2013 14:00 | 0 | 264.438384  | 264.4359728 | 264.432048 | 264.414664 | 264.4207664 |
| 10/24/2013 14:10 | 0 | 264.4386888 | 264.4419728 | 264.434048 | 264.413664 | 264.4237664 |
| 10/24/2013 14:20 | 0 | 264.4377744 | 264.4329728 | 264.431048 | 264.410664 | 264.4207664 |
| 10/24/2013 14:30 | 0 | 264.4377744 | 264.4369728 | 264.431048 | 264.412664 | 264.4197664 |
| 10/24/2013 14:40 | 0 | 264.4374696 | 264.4369728 | 264.431048 | 264.413664 | 264.4217664 |
| 10/24/2013 14:50 | 0 | 264.43686   | 264.4349728 | 264.428048 | 264.411664 | 264.4197664 |
| 10/24/2013 15:00 | 0 | 264.4362504 | 264.4339728 | 264.430048 | 264.413664 | 264.4177664 |
| 10/24/2013 15:10 | 0 | 264.43686   | 264.4389728 | 264.430048 | 264.411664 | 264.4217664 |
| 10/24/2013 15:20 | 0 | 264.4362504 | 264.4319728 | 264.428048 | 264.413664 | 264.4197664 |
| 10/24/2013 15:30 | 0 | 264.4362504 | 264.4359728 | 264.430048 | 264.412664 | 264.4187664 |
| 10/24/2013 15:40 | 0 | 264.4362504 | 264.4359728 | 264.430048 | 264.413664 | 264.4197664 |
| 10/24/2013 15:50 | 0 | 264.4344216 | 264.4289728 | 264.428048 | 264.412664 | 264.4187664 |
| 10/24/2013 16:00 | 0 | 264.4347264 | 264.4339728 | 264.427048 | 264.410664 | 264.4167664 |
| 10/24/2013 16:10 | 0 | 264.4356408 | 264.4349728 | 264.428048 | 264.411664 | 264.4197664 |
| 10/24/2013 16:20 | 0 | 264.4341168 | 264.4309728 | 264.428048 | 264.413664 | 264.4177664 |
| 10/24/2013 16:30 | 0 | 264.4341168 | 264.4309728 | 264.426048 | 264.413664 | 264.4187664 |
| 10/24/2013 16:40 | 0 | 264.433812  | 264.4289728 | 264.426048 | 264.412664 | 264.4157664 |
| 10/24/2013 16:50 | 0 | 264.432288  | 264.4289728 | 264.426048 | 264.415664 | 264.4177664 |
| 10/24/2013 17:00 | 0 | 264.433812  | 264.4339728 | 264.426048 | 264.412664 | 264.4167664 |
| 10/24/2013 17:10 | 0 | 264.4316784 | 264.4259728 | 264.424048 | 264.414664 | 264.4157664 |
| 10/24/2013 17:20 | 0 | 264.4316784 | 264.4279728 | 264.426048 | 264.412664 | 264.4147664 |
| 10/24/2013 17:30 | 0 | 264.430764  | 264.4249728 | 264.422048 | 264.412664 | 264.4137664 |
| 10/24/2013 17:40 | 0 | 264.4313736 | 264.4279728 | 264.422048 | 264.412664 | 264.4137664 |
| 10/24/2013 17:50 | 0 | 264.4313736 | 264.4259728 | 264.420048 | 264.411664 | 264.4127664 |
| 10/24/2013 18:00 | 0 | 264.4304592 | 264.4209728 | 264.420048 | 264.412664 | 264.4107664 |
| 10/24/2013 18:10 | 0 | 264.4325928 | 264.4329728 | 264.423048 | 264.411664 | 264.4137664 |
| 10/24/2013 18:20 | 0 | 264.4325928 | 264.4299728 | 264.426048 | 264.414664 | 264.4157664 |
| 10/24/2013 18:30 | 0 | 264.433812  | 264.4349728 | 264.427048 | 264.416664 | 264.4177664 |
| 10/24/2013 18:40 | 0 | 264.4344216 | 264.4359728 | 264.427048 | 264.416664 | 264.4177664 |
| 10/24/2013 18:50 | 0 | 264.4347264 | 264.4349728 | 264.428048 | 264.413664 | 264.4157664 |
| 10/24/2013 19:00 | 0 | 264.4328976 | 264.4269728 | 264.425048 | 264.413664 | 264.4127664 |
| 10/24/2013 19:10 | 0 | 264.4350312 | 264.4349728 | 264.427048 | 264.413664 | 264.4167664 |
| 10/24/2013 19:20 | 0 | 264.4359456 | 264.4369728 | 264.428048 | 264.413664 | 264.4197664 |
| 10/24/2013 19:30 | 0 | 264.4356408 | 264.4339728 | 264.429048 | 264.413664 | 264.4167664 |

|                  |   |             |             |            |            |             |
|------------------|---|-------------|-------------|------------|------------|-------------|
| 10/24/2013 19:40 | 0 | 264.4365552 | 264.4389728 | 264.431048 | 264.415664 | 264.4197664 |
| 10/24/2013 19:50 | 0 | 264.4377744 | 264.4369728 | 264.431048 | 264.414664 | 264.4207664 |
| 10/24/2013 20:00 | 0 | 264.4386888 | 264.4369728 | 264.431048 | 264.411664 | 264.4207664 |
| 10/24/2013 20:10 | 0 | 264.4396032 | 264.4429728 | 264.435048 | 264.413664 | 264.4237664 |
| 10/24/2013 20:20 | 0 | 264.4405176 | 264.4419728 | 264.436048 | 264.412664 | 264.4207664 |
| 10/24/2013 20:30 | 0 | 264.4417368 | 264.4439728 | 264.435048 | 264.414664 | 264.4227664 |
| 10/24/2013 20:40 | 0 | 264.4426512 | 264.4459728 | 264.436048 | 264.414664 | 264.4227664 |
| 10/24/2013 20:50 | 0 | 264.4435656 | 264.4479728 | 264.436048 | 264.415664 | 264.4227664 |
| 10/24/2013 21:00 | 0 | 264.444448  | 264.4459728 | 264.439048 | 264.413664 | 264.4227664 |
| 10/24/2013 21:10 | 0 | 264.4453944 | 264.4479728 | 264.439048 | 264.413664 | 264.4247664 |
| 10/24/2013 21:20 | 0 | 264.446004  | 264.4489728 | 264.443048 | 264.415664 | 264.4257664 |
| 10/24/2013 21:30 | 0 | 264.4466136 | 264.4509728 | 264.444048 | 264.416664 | 264.4277664 |
| 10/24/2013 21:40 | 0 | 264.4469184 | 264.4479728 | 264.443048 | 264.412664 | 264.4247664 |
| 10/24/2013 21:50 | 0 | 264.447528  | 264.4489728 | 264.446048 | 264.417664 | 264.4297664 |
| 10/24/2013 22:00 | 0 | 264.4487472 | 264.4519728 | 264.445048 | 264.418664 | 264.4287664 |
| 10/24/2013 22:10 | 0 | 264.4496616 | 264.4549728 | 264.448048 | 264.414664 | 264.4297664 |
| 10/24/2013 22:20 | 0 | 264.4502712 | 264.4529728 | 264.448048 | 264.413664 | 264.4307664 |
| 10/24/2013 22:30 | 0 | 264.450576  | 264.4519728 | 264.445048 | 264.414664 | 264.4307664 |
| 10/24/2013 22:40 | 0 | 264.450576  | 264.4519728 | 264.447048 | 264.413664 | 264.4287664 |
| 10/24/2013 22:50 | 0 | 264.450576  | 264.4519728 | 264.448048 | 264.416664 | 264.4297664 |
| 10/24/2013 23:00 | 0 | 264.450576  | 264.4519728 | 264.447048 | 264.416664 | 264.4307664 |
| 10/24/2013 23:10 | 0 | 264.4499664 | 264.4499728 | 264.445048 | 264.416664 | 264.4287664 |
| 10/24/2013 23:20 | 0 | 264.4487472 | 264.4469728 | 264.445048 | 264.415664 | 264.4277664 |
| 10/24/2013 23:30 | 0 | 264.4478328 | 264.4439728 | 264.440048 | 264.413664 | 264.4257664 |
| 10/24/2013 23:40 | 0 | 264.4466136 | 264.4429728 | 264.440048 | 264.413664 | 264.4277664 |
| 10/24/2013 23:50 | 0 | 264.446004  | 264.4429728 | 264.439048 | 264.413664 | 264.4297664 |
| 10/25/2013 0:00  | 0 | 264.4450896 | 264.4389728 | 264.437048 | 264.415664 | 264.4267664 |
| 10/25/2013 0:10  | 0 | 264.4438704 | 264.4389728 | 264.437048 | 264.415664 | 264.4277664 |
| 10/25/2013 0:20  | 0 | 264.4426512 | 264.4359728 | 264.436048 | 264.415664 | 264.4267664 |
| 10/25/2013 0:30  | 0 | 264.4411272 | 264.4359728 | 264.433048 | 264.415664 | 264.4227664 |
| 10/25/2013 0:40  | 0 | 264.4386888 | 264.4279728 | 264.429048 | 264.416664 | 264.4217664 |
| 10/25/2013 0:50  | 0 | 264.4377744 | 264.4299728 | 264.428048 | 264.414664 | 264.4217664 |
| 10/25/2013 1:00  | 0 | 264.4374696 | 264.4289728 | 264.426048 | 264.414664 | 264.4217664 |
| 10/25/2013 1:10  | 0 | 264.4328976 | 264.4149728 | 264.424048 | 264.416664 | 264.4187664 |
| 10/25/2013 1:20  | 0 | 264.4332024 | 264.4249728 | 264.421048 | 264.414664 | 264.4187664 |
| 10/25/2013 1:30  | 0 | 264.4310688 | 264.4159728 | 264.420048 | 264.415664 | 264.4177664 |
| 10/25/2013 1:40  | 0 | 264.4289352 | 264.4189728 | 264.414048 | 264.415664 | 264.4167664 |
| 10/25/2013 1:50  | 0 | 264.4255824 | 264.4059728 | 264.413048 | 264.415664 | 264.4127664 |
| 10/25/2013 2:00  | 0 | 264.426192  | 264.4159728 | 264.411048 | 264.415664 | 264.4147664 |
| 10/25/2013 2:10  | 0 | 264.4213152 | 264.3999728 | 264.405048 | 264.415664 | 264.4077664 |
| 10/25/2013 2:20  | 0 | 264.4194864 | 264.4009728 | 264.406048 | 264.415664 | 264.4107664 |
| 10/25/2013 2:30  | 0 | 264.4182672 | 264.4029728 | 264.401048 | 264.412664 | 264.4097664 |
| 10/25/2013 2:40  | 0 | 264.4152192 | 264.3999728 | 264.397048 | 264.415664 | 264.4057664 |
| 10/25/2013 2:50  | 0 | 264.4143048 | 264.4009728 | 264.398048 | 264.417664 | 264.4087664 |
| 10/25/2013 3:00  | 0 | 264.412476  | 264.3959728 | 264.397048 | 264.415664 | 264.4057664 |
| 10/25/2013 3:10  | 0 | 264.4112568 | 264.3959728 | 264.395048 | 264.417664 | 264.4057664 |
| 10/25/2013 3:20  | 0 | 264.410952  | 264.3979728 | 264.395048 | 264.416664 | 264.4047664 |

|                  |   |             |             |            |            |             |
|------------------|---|-------------|-------------|------------|------------|-------------|
| 10/25/2013 3:30  | 0 | 264.4085136 | 264.3929728 | 264.392048 | 264.414664 | 264.4007664 |
| 10/25/2013 3:40  | 0 | 264.4088184 | 264.3969728 | 264.393048 | 264.415664 | 264.4007664 |
| 10/25/2013 3:50  | 0 | 264.407904  | 264.3979728 | 264.393048 | 264.417664 | 264.4017664 |
| 10/25/2013 4:00  | 0 | 264.4072944 | 264.3949728 | 264.390048 | 264.414664 | 264.4007664 |
| 10/25/2013 4:10  | 0 | 264.407904  | 264.3969728 | 264.390048 | 264.410664 | 264.3997664 |
| 10/25/2013 4:20  | 0 | 264.4066848 | 264.3959728 | 264.392048 | 264.415664 | 264.4007664 |
| 10/25/2013 4:30  | 0 | 264.40638   | 264.3969728 | 264.389048 | 264.412664 | 264.3967664 |
| 10/25/2013 4:40  | 0 | 264.4045512 | 264.3879728 | 264.390048 | 264.412664 | 264.3967664 |
| 10/25/2013 4:50  | 0 | 264.404856  | 264.3949728 | 264.392048 | 264.413664 | 264.3987664 |
| 10/25/2013 5:00  | 0 | 264.4030272 | 264.3869728 | 264.389048 | 264.414664 | 264.3967664 |
| 10/25/2013 5:10  | 0 | 264.4027224 | 264.3919728 | 264.389048 | 264.414664 | 264.3967664 |
| 10/25/2013 5:20  | 0 | 264.4021128 | 264.3909728 | 264.383048 | 264.409664 | 264.3927664 |
| 10/25/2013 5:30  | 0 | 264.4005888 | 264.3869728 | 264.385048 | 264.413664 | 264.3927664 |
| 10/25/2013 5:40  | 0 | 264.400284  | 264.3909728 | 264.383048 | 264.411664 | 264.3917664 |
| 10/25/2013 5:50  | 0 | 264.3996744 | 264.3839728 | 264.383048 | 264.410664 | 264.3917664 |
| 10/25/2013 6:00  | 0 | 264.3996744 | 264.3869728 | 264.386048 | 264.409664 | 264.3927664 |
| 10/25/2013 6:10  | 0 | 264.3990648 | 264.3869728 | 264.385048 | 264.413664 | 264.3927664 |
| 10/25/2013 6:20  | 0 | 264.3999792 | 264.3909728 | 264.384048 | 264.409664 | 264.3917664 |
| 10/25/2013 6:30  | 0 | 264.3996744 | 264.3919728 | 264.385048 | 264.411664 | 264.3907664 |
| 10/25/2013 6:40  | 0 | 264.4005888 | 264.3949728 | 264.387048 | 264.411664 | 264.3927664 |
| 10/25/2013 6:50  | 0 | 264.4030272 | 264.3939728 | 264.389048 | 264.409664 | 264.3927664 |
| 10/25/2013 7:00  | 0 | 264.4027224 | 264.3939728 | 264.387048 | 264.407664 | 264.3907664 |
| 10/25/2013 7:10  | 0 | 264.4051608 | 264.4009728 | 264.390048 | 264.408664 | 264.3937664 |
| 10/25/2013 7:20  | 0 | 264.407904  | 264.4079728 | 264.396048 | 264.412664 | 264.3967664 |
| 10/25/2013 7:30  | 0 | 264.4103424 | 264.4089728 | 264.397048 | 264.408664 | 264.3967664 |
| 10/25/2013 7:40  | 0 | 264.414     | 264.4149728 | 264.404048 | 264.409664 | 264.3997664 |
| 10/25/2013 7:50  | 0 | 264.4176576 | 264.4239728 | 264.406048 | 264.409664 | 264.4037664 |
| 10/25/2013 8:00  | 0 | 264.4222296 | 264.4349728 | 264.413048 | 264.412664 | 264.4077664 |
| 10/25/2013 8:10  | 0 | 264.4243632 | 264.4319728 | 264.417048 | 264.411664 | 264.4087664 |
| 10/25/2013 8:20  | 0 | 264.4301544 | 264.4449728 | 264.423048 | 264.411664 | 264.4137664 |
| 10/25/2013 8:30  | 0 | 264.4325928 | 264.4429728 | 264.429048 | 264.408664 | 264.4137664 |
| 10/25/2013 8:40  | 0 | 264.4371648 | 264.4529728 | 264.436048 | 264.411664 | 264.4197664 |
| 10/25/2013 8:50  | 0 | 264.4392984 | 264.4519728 | 264.439048 | 264.409664 | 264.4187664 |
| 10/25/2013 9:00  | 0 | 264.4438704 | 264.4579728 | 264.444048 | 264.409664 | 264.4217664 |
| 10/25/2013 9:10  | 0 | 264.4466136 | 264.4609728 | 264.448048 | 264.409664 | 264.4247664 |
| 10/25/2013 9:20  | 0 | 264.4472232 | 264.4549728 | 264.448048 | 264.408664 | 264.4207664 |
| 10/25/2013 9:30  | 0 | 264.4487472 | 264.4579728 | 264.451048 | 264.409664 | 264.4247664 |
| 10/25/2013 9:40  | 0 | 264.4481376 | 264.4519728 | 264.449048 | 264.408664 | 264.4237664 |
| 10/25/2013 9:50  | 0 | 264.450576  | 264.4609728 | 264.452048 | 264.409664 | 264.4267664 |
| 10/25/2013 10:00 | 0 | 264.4530144 | 264.4659728 | 264.455048 | 264.407664 | 264.4287664 |
| 10/25/2013 10:10 | 0 | 264.455148  | 264.4709728 | 264.459048 | 264.410664 | 264.4327664 |
| 10/25/2013 10:20 | 0 | 264.4545384 | 264.4609728 | 264.459048 | 264.410664 | 264.4317664 |
| 10/25/2013 10:30 | 0 | 264.4548432 | 264.4639728 | 264.458048 | 264.411664 | 264.4307664 |
| 10/25/2013 10:40 | 0 | 264.4545384 | 264.4609728 | 264.457048 | 264.410664 | 264.4287664 |
| 10/25/2013 10:50 | 0 | 264.4542336 | 264.4599728 | 264.455048 | 264.411664 | 264.4287664 |
| 10/25/2013 11:00 | 0 | 264.4545384 | 264.4599728 | 264.457048 | 264.411664 | 264.4317664 |
| 10/25/2013 11:10 | 0 | 264.4542336 | 264.4599728 | 264.455048 | 264.412664 | 264.4317664 |

|                  |   |             |             |            |            |             |
|------------------|---|-------------|-------------|------------|------------|-------------|
| 10/25/2013 11:20 | 0 | 264.4542336 | 264.4569728 | 264.454048 | 264.411664 | 264.4297664 |
| 10/25/2013 11:30 | 0 | 264.4539288 | 264.4559728 | 264.453048 | 264.411664 | 264.4307664 |
| 10/25/2013 11:40 | 0 | 264.4530144 | 264.4529728 | 264.453048 | 264.411664 | 264.4287664 |
| 10/25/2013 11:50 | 0 | 264.4517952 | 264.4519728 | 264.450048 | 264.410664 | 264.4307664 |
| 10/25/2013 12:00 | 0 | 264.4508808 | 264.4519728 | 264.449048 | 264.412664 | 264.4297664 |
| 10/25/2013 12:10 | 0 | 264.4496616 | 264.4479728 | 264.448048 | 264.411664 | 264.4297664 |
| 10/25/2013 12:20 | 0 | 264.4487472 | 264.4459728 | 264.445048 | 264.413664 | 264.4277664 |
| 10/25/2013 12:30 | 0 | 264.4472232 | 264.4459728 | 264.445048 | 264.412664 | 264.4297664 |
| 10/25/2013 12:40 | 0 | 264.4469184 | 264.4429728 | 264.442048 | 264.412664 | 264.4267664 |
| 10/25/2013 12:50 | 0 | 264.4456992 | 264.4449728 | 264.441048 | 264.414664 | 264.4297664 |
| 10/25/2013 13:00 | 0 | 264.4453944 | 264.4419728 | 264.440048 | 264.412664 | 264.4287664 |
| 10/25/2013 13:10 | 0 | 264.4447848 | 264.4429728 | 264.440048 | 264.413664 | 264.4287664 |
| 10/25/2013 13:20 | 0 | 264.4441752 | 264.4409728 | 264.439048 | 264.413664 | 264.4267664 |
| 10/25/2013 13:30 | 0 | 264.4441752 | 264.4419728 | 264.439048 | 264.412664 | 264.4257664 |
| 10/25/2013 13:40 | 0 | 264.4435656 | 264.4389728 | 264.436048 | 264.410664 | 264.4257664 |
| 10/25/2013 13:50 | 0 | 264.442956  | 264.4409728 | 264.435048 | 264.414664 | 264.4277664 |
| 10/25/2013 14:00 | 0 | 264.442956  | 264.4449728 | 264.438048 | 264.413664 | 264.4287664 |
| 10/25/2013 14:10 | 0 | 264.4432608 | 264.4419728 | 264.437048 | 264.413664 | 264.4257664 |
| 10/25/2013 14:20 | 0 | 264.4438704 | 264.4449728 | 264.438048 | 264.412664 | 264.4267664 |
| 10/25/2013 14:30 | 0 | 264.44448   | 264.4479728 | 264.440048 | 264.413664 | 264.4277664 |
| 10/25/2013 14:40 | 0 | 264.4450896 | 264.4469728 | 264.441048 | 264.415664 | 264.4267664 |
| 10/25/2013 14:50 | 0 | 264.4447848 | 264.4469728 | 264.441048 | 264.414664 | 264.4277664 |
| 10/25/2013 15:00 | 0 | 264.44448   | 264.4449728 | 264.440048 | 264.415664 | 264.4277664 |
| 10/25/2013 15:10 | 0 | 264.4438704 | 264.4409728 | 264.438048 | 264.413664 | 264.4267664 |
| 10/25/2013 15:20 | 0 | 264.4435656 | 264.4409728 | 264.437048 | 264.414664 | 264.4267664 |
| 10/25/2013 15:30 | 0 | 264.442956  | 264.4419728 | 264.437048 | 264.413664 | 264.4277664 |
| 10/25/2013 15:40 | 0 | 264.4423464 | 264.4369728 | 264.435048 | 264.413664 | 264.4257664 |
| 10/25/2013 15:50 | 0 | 264.4411272 | 264.4369728 | 264.435048 | 264.414664 | 264.4237664 |
| 10/25/2013 16:00 | 0 | 264.4396032 | 264.4359728 | 264.433048 | 264.412664 | 264.4237664 |
| 10/25/2013 16:10 | 0 | 264.4392984 | 264.4359728 | 264.431048 | 264.414664 | 264.4237664 |
| 10/25/2013 16:20 | 0 | 264.4392984 | 264.4359728 | 264.432048 | 264.415664 | 264.4237664 |
| 10/25/2013 16:30 | 0 | 264.438384  | 264.4329728 | 264.428048 | 264.412664 | 264.4197664 |
| 10/25/2013 16:40 | 0 | 264.4371648 | 264.4389728 | 264.431048 | 264.414664 | 264.4237664 |
| 10/25/2013 16:50 | 0 | 264.4377744 | 264.4349728 | 264.431048 | 264.412664 | 264.4237664 |
| 10/25/2013 17:00 | 0 | 264.4374696 | 264.4349728 | 264.429048 | 264.412664 | 264.4217664 |
| 10/25/2013 17:10 | 0 | 264.4374696 | 264.4359728 | 264.431048 | 264.413664 | 264.4217664 |
| 10/25/2013 17:20 | 0 | 264.4374696 | 264.4359728 | 264.430048 | 264.412664 | 264.4227664 |
| 10/25/2013 17:30 | 0 | 264.4374696 | 264.4319728 | 264.430048 | 264.413664 | 264.4217664 |
| 10/25/2013 17:40 | 0 | 264.435336  | 264.4219728 | 264.425048 | 264.412664 | 264.4167664 |
| 10/25/2013 17:50 | 0 | 264.4332024 | 264.4369728 | 264.425048 | 264.413664 | 264.4217664 |
| 10/25/2013 18:00 | 0 | 264.4365552 | 264.4379728 | 264.428048 | 264.415664 | 264.4227664 |
| 10/25/2013 18:10 | 0 | 264.4371648 | 264.4359728 | 264.430048 | 264.414664 | 264.4227664 |
| 10/25/2013 18:20 | 0 | 264.4386888 | 264.4469728 | 264.433048 | 264.415664 | 264.4267664 |
| 10/25/2013 18:30 | 0 | 264.4411272 | 264.4419728 | 264.435048 | 264.411664 | 264.4267664 |
| 10/25/2013 18:40 | 0 | 264.4420416 | 264.4439728 | 264.436048 | 264.413664 | 264.4247664 |
| 10/25/2013 18:50 | 0 | 264.4423464 | 264.4429728 | 264.437048 | 264.412664 | 264.4247664 |
| 10/25/2013 19:00 | 0 | 264.4423464 | 264.4439728 | 264.440048 | 264.415664 | 264.4277664 |

|                  |   |             |             |            |            |             |
|------------------|---|-------------|-------------|------------|------------|-------------|
| 10/25/2013 19:10 | 0 | 264.442956  | 264.4429728 | 264.437048 | 264.415664 | 264.4277664 |
| 10/25/2013 19:20 | 0 | 264.442956  | 264.4429728 | 264.437048 | 264.414664 | 264.4247664 |
| 10/25/2013 19:30 | 0 | 264.4432608 | 264.4439728 | 264.437048 | 264.413664 | 264.4277664 |
| 10/25/2013 19:40 | 0 | 264.4438704 | 264.4459728 | 264.440048 | 264.415664 | 264.4287664 |
| 10/25/2013 19:50 | 0 | 264.4438704 | 264.4459728 | 264.440048 | 264.415664 | 264.4287664 |
| 10/25/2013 20:00 | 0 | 264.4441752 | 264.4439728 | 264.439048 | 264.413664 | 264.4267664 |
| 10/25/2013 20:10 | 0 | 264.4438704 | 264.4439728 | 264.439048 | 264.414664 | 264.4277664 |
| 10/25/2013 20:20 | 0 | 264.4438704 | 264.4479728 | 264.439048 | 264.416664 | 264.4277664 |
| 10/25/2013 20:30 | 0 | 264.4441752 | 264.4469728 | 264.439048 | 264.417664 | 264.4277664 |
| 10/25/2013 20:40 | 0 | 264.4441752 | 264.4469728 | 264.440048 | 264.415664 | 264.4297664 |
| 10/25/2013 20:50 | 0 | 264.4447848 | 264.4469728 | 264.439048 | 264.416664 | 264.4297664 |
| 10/25/2013 21:00 | 0 | 264.4447848 | 264.4469728 | 264.439048 | 264.414664 | 264.4297664 |
| 10/25/2013 21:10 | 0 | 264.4453944 | 264.4449728 | 264.439048 | 264.416664 | 264.4297664 |
| 10/25/2013 21:20 | 0 | 264.4453944 | 264.4449728 | 264.439048 | 264.416664 | 264.4297664 |
| 10/25/2013 21:30 | 0 | 264.4453944 | 264.4469728 | 264.439048 | 264.414664 | 264.4297664 |
| 10/25/2013 21:40 | 0 | 264.4450896 | 264.4449728 | 264.439048 | 264.414664 | 264.4277664 |
| 10/25/2013 21:50 | 0 | 264.4456992 | 264.4449728 | 264.439048 | 264.416664 | 264.4277664 |
| 10/25/2013 22:00 | 0 | 264.4453944 | 264.4469728 | 264.442048 | 264.417664 | 264.4297664 |
| 10/25/2013 22:10 | 0 | 264.4456992 | 264.4449728 | 264.439048 | 264.415664 | 264.4267664 |
| 10/25/2013 22:20 | 0 | 264.4453944 | 264.4449728 | 264.442048 | 264.415664 | 264.4287664 |
| 10/25/2013 22:30 | 0 | 264.4447848 | 264.4449728 | 264.439048 | 264.417664 | 264.4277664 |
| 10/25/2013 22:40 | 0 | 264.4438704 | 264.4419728 | 264.439048 | 264.415664 | 264.4257664 |
| 10/25/2013 22:50 | 0 | 264.4432608 | 264.4389728 | 264.436048 | 264.414664 | 264.4247664 |
| 10/25/2013 23:00 | 0 | 264.442956  | 264.4399728 | 264.435048 | 264.415664 | 264.4257664 |
| 10/25/2013 23:10 | 0 | 264.4426512 | 264.4429728 | 264.437048 | 264.418664 | 264.4287664 |
| 10/25/2013 23:20 | 0 | 264.4417368 | 264.4379728 | 264.435048 | 264.416664 | 264.4267664 |
| 10/25/2013 23:30 | 0 | 264.4411272 | 264.4409728 | 264.435048 | 264.417664 | 264.4277664 |
| 10/25/2013 23:40 | 0 | 264.4408224 | 264.4389728 | 264.434048 | 264.417664 | 264.4257664 |
| 10/25/2013 23:50 | 0 | 264.4408224 | 264.4389728 | 264.433048 | 264.417664 | 264.4257664 |
| 10/26/2013 0:00  | 0 | 264.4408224 | 264.4399728 | 264.433048 | 264.416664 | 264.4257664 |
| 10/26/2013 0:10  | 0 | 264.4402128 | 264.4379728 | 264.434048 | 264.418664 | 264.4257664 |
| 10/26/2013 0:20  | 0 | 264.439908  | 264.4349728 | 264.433048 | 264.417664 | 264.4247664 |
| 10/26/2013 0:30  | 0 | 264.4386888 | 264.4339728 | 264.433048 | 264.417664 | 264.4247664 |
| 10/26/2013 0:40  | 0 | 264.4374696 | 264.4319728 | 264.432048 | 264.418664 | 264.4237664 |
| 10/26/2013 0:50  | 0 | 264.4362504 | 264.4299728 | 264.429048 | 264.416664 | 264.4237664 |
| 10/26/2013 1:00  | 0 | 264.4350312 | 264.4269728 | 264.427048 | 264.417664 | 264.4217664 |
| 10/26/2013 1:10  | 0 | 264.4335072 | 264.4249728 | 264.424048 | 264.415664 | 264.4197664 |
| 10/26/2013 1:20  | 0 | 264.4316784 | 264.4249728 | 264.424048 | 264.419664 | 264.4237664 |
| 10/26/2013 1:30  | 0 | 264.4283256 | 264.4199728 | 264.417048 | 264.418664 | 264.4187664 |
| 10/26/2013 1:40  | 0 | 264.4283256 | 264.4229728 | 264.419048 | 264.418664 | 264.4187664 |
| 10/26/2013 1:50  | 0 | 264.4283256 | 264.4139728 | 264.416048 | 264.417664 | 264.4167664 |
| 10/26/2013 2:00  | 0 | 264.4258872 | 264.4189728 | 264.413048 | 264.418664 | 264.4167664 |
| 10/26/2013 2:10  | 0 | 264.4249728 | 264.4139728 | 264.411048 | 264.420664 | 264.4147664 |
| 10/26/2013 2:20  | 0 | 264.4240584 | 264.3999728 | 264.410048 | 264.418664 | 264.4127664 |
| 10/26/2013 2:30  | 0 | 264.420096  | 264.4149728 | 264.408048 | 264.421664 | 264.4137664 |
| 10/26/2013 2:40  | 0 | 264.42162   | 264.3989728 | 264.404048 | 264.417664 | 264.4087664 |
| 10/26/2013 2:50  | 0 | 264.4179624 | 264.4109728 | 264.404048 | 264.417664 | 264.4117664 |

|                  |   |             |             |            |            |             |
|------------------|---|-------------|-------------|------------|------------|-------------|
| 10/26/2013 3:00  | 0 | 264.417048  | 264.4029728 | 264.399048 | 264.417664 | 264.4087664 |
| 10/26/2013 3:10  | 0 | 264.4167432 | 264.3969728 | 264.400048 | 264.419664 | 264.4047664 |
| 10/26/2013 3:20  | 0 | 264.4130856 | 264.3999728 | 264.396048 | 264.416664 | 264.4047664 |
| 10/26/2013 3:30  | 0 | 264.410952  | 264.3999728 | 264.393048 | 264.415664 | 264.4047664 |
| 10/26/2013 3:40  | 0 | 264.4121712 | 264.3949728 | 264.395048 | 264.415664 | 264.4047664 |
| 10/26/2013 3:50  | 0 | 264.4091232 | 264.3999728 | 264.394048 | 264.415664 | 264.4047664 |
| 10/26/2013 4:00  | 0 | 264.4082088 | 264.4009728 | 264.394048 | 264.414664 | 264.4047664 |
| 10/26/2013 4:10  | 0 | 264.4075992 | 264.3979728 | 264.391048 | 264.416664 | 264.4027664 |
| 10/26/2013 4:20  | 0 | 264.4066848 | 264.3919728 | 264.387048 | 264.413664 | 264.3997664 |
| 10/26/2013 4:30  | 0 | 264.4057704 | 264.3869728 | 264.388048 | 264.415664 | 264.3987664 |
| 10/26/2013 4:40  | 0 | 264.4042464 | 264.3899728 | 264.387048 | 264.416664 | 264.3987664 |
| 10/26/2013 4:50  | 0 | 264.4027224 | 264.3959728 | 264.387048 | 264.414664 | 264.3967664 |
| 10/26/2013 5:00  | 0 | 264.4021128 | 264.3939728 | 264.388048 | 264.416664 | 264.3987664 |
| 10/26/2013 5:10  | 0 | 264.4021128 | 264.3849728 | 264.384048 | 264.413664 | 264.3957664 |
| 10/26/2013 5:20  | 0 | 264.400284  | 264.3849728 | 264.384048 | 264.412664 | 264.3917664 |
| 10/26/2013 5:30  | 0 | 264.3999792 | 264.3899728 | 264.384048 | 264.412664 | 264.3937664 |
| 10/26/2013 5:40  | 0 | 264.3996744 | 264.3889728 | 264.384048 | 264.414664 | 264.3937664 |
| 10/26/2013 5:50  | 0 | 264.39876   | 264.3909728 | 264.383048 | 264.413664 | 264.3937664 |
| 10/26/2013 6:00  | 0 | 264.3984552 | 264.3889728 | 264.382048 | 264.411664 | 264.3907664 |
| 10/26/2013 6:10  | 0 | 264.3981504 | 264.3839728 | 264.384048 | 264.413664 | 264.3887664 |
| 10/26/2013 6:20  | 0 | 264.3981504 | 264.3919728 | 264.384048 | 264.411664 | 264.3927664 |
| 10/26/2013 6:30  | 0 | 264.3978456 | 264.3859728 | 264.384048 | 264.411664 | 264.3907664 |
| 10/26/2013 6:40  | 0 | 264.3978456 | 264.3899728 | 264.385048 | 264.412664 | 264.3917664 |
| 10/26/2013 6:50  | 0 | 264.3975408 | 264.3889728 | 264.384048 | 264.411664 | 264.3907664 |
| 10/26/2013 7:00  | 0 | 264.3975408 | 264.3869728 | 264.384048 | 264.411664 | 264.3907664 |
| 10/26/2013 7:10  | 0 | 264.3975408 | 264.3919728 | 264.383048 | 264.408664 | 264.3897664 |
| 10/26/2013 7:20  | 0 | 264.3981504 | 264.3939728 | 264.383048 | 264.411664 | 264.3917664 |
| 10/26/2013 7:30  | 0 | 264.3996744 | 264.3959728 | 264.387048 | 264.411664 | 264.3937664 |
| 10/26/2013 7:40  | 0 | 264.400284  | 264.3929728 | 264.386048 | 264.410664 | 264.3907664 |
| 10/26/2013 7:50  | 0 | 264.4008936 | 264.3979728 | 264.390048 | 264.410664 | 264.3927664 |
| 10/26/2013 8:00  | 0 | 264.4011984 | 264.4019728 | 264.390048 | 264.407664 | 264.3927664 |
| 10/26/2013 8:10  | 0 | 264.4039416 | 264.4059728 | 264.391048 | 264.408664 | 264.3937664 |
| 10/26/2013 8:20  | 0 | 264.4051608 | 264.4089728 | 264.395048 | 264.410664 | 264.3957664 |
| 10/26/2013 8:30  | 0 | 264.409428  | 264.4089728 | 264.398048 | 264.409664 | 264.3977664 |
| 10/26/2013 8:40  | 0 | 264.4106472 | 264.4129728 | 264.402048 | 264.409664 | 264.3997664 |
| 10/26/2013 8:50  | 0 | 264.4118664 | 264.4179728 | 264.403048 | 264.408664 | 264.3997664 |
| 10/26/2013 9:00  | 0 | 264.4136952 | 264.4169728 | 264.407048 | 264.408664 | 264.3997664 |
| 10/26/2013 9:10  | 0 | 264.4152192 | 264.4219728 | 264.410048 | 264.407664 | 264.4007664 |
| 10/26/2013 9:20  | 0 | 264.417048  | 264.4229728 | 264.408048 | 264.408664 | 264.4027664 |
| 10/26/2013 9:30  | 0 | 264.4204008 | 264.4239728 | 264.412048 | 264.408664 | 264.4047664 |
| 10/26/2013 9:40  | 0 | 264.4222296 | 264.4279728 | 264.418048 | 264.408664 | 264.4077664 |
| 10/26/2013 9:50  | 0 | 264.4243632 | 264.4299728 | 264.421048 | 264.410664 | 264.4087664 |
| 10/26/2013 10:00 | 0 | 264.4264968 | 264.4349728 | 264.424048 | 264.409664 | 264.4107664 |
| 10/26/2013 10:10 | 0 | 264.4271064 | 264.4369728 | 264.423048 | 264.408664 | 264.4097664 |
| 10/26/2013 10:20 | 0 | 264.4289352 | 264.4419728 | 264.428048 | 264.408664 | 264.4117664 |
| 10/26/2013 10:30 | 0 | 264.4328976 | 264.4449728 | 264.431048 | 264.408664 | 264.4147664 |
| 10/26/2013 10:40 | 0 | 264.4356408 | 264.4519728 | 264.436048 | 264.405664 | 264.4167664 |

|                  |   |             |             |            |            |             |
|------------------|---|-------------|-------------|------------|------------|-------------|
| 10/26/2013 10:50 | 0 | 264.4389936 | 264.4489728 | 264.439048 | 264.406664 | 264.4157664 |
| 10/26/2013 11:00 | 0 | 264.4405176 | 264.4579728 | 264.443048 | 264.408664 | 264.4217664 |
| 10/26/2013 11:10 | 0 | 264.4435656 | 264.4579728 | 264.447048 | 264.410664 | 264.4237664 |
| 10/26/2013 11:20 | 0 | 264.4453944 | 264.4599728 | 264.451048 | 264.412664 | 264.4237664 |
| 10/26/2013 11:30 | 0 | 264.4478328 | 264.4619728 | 264.451048 | 264.409664 | 264.4237664 |
| 10/26/2013 11:40 | 0 | 264.449052  | 264.4619728 | 264.452048 | 264.408664 | 264.4247664 |
| 10/26/2013 11:50 | 0 | 264.4508808 | 264.4649728 | 264.456048 | 264.411664 | 264.4287664 |
| 10/26/2013 12:00 | 0 | 264.4514904 | 264.4659728 | 264.455048 | 264.411664 | 264.4297664 |
| 10/26/2013 12:10 | 0 | 264.4530144 | 264.4619728 | 264.456048 | 264.410664 | 264.4297664 |
| 10/26/2013 12:20 | 0 | 264.4530144 | 264.4589728 | 264.456048 | 264.411664 | 264.4287664 |
| 10/26/2013 12:30 | 0 | 264.4521    | 264.4609728 | 264.452048 | 264.408664 | 264.4267664 |
| 10/26/2013 12:40 | 0 | 264.4524048 | 264.4609728 | 264.451048 | 264.410664 | 264.4277664 |
| 10/26/2013 12:50 | 0 | 264.4545384 | 264.4639728 | 264.453048 | 264.408664 | 264.4287664 |
| 10/26/2013 13:00 | 0 | 264.4557576 | 264.4699728 | 264.460048 | 264.411664 | 264.4337664 |
| 10/26/2013 13:10 | 0 | 264.4572816 | 264.4729728 | 264.462048 | 264.411664 | 264.4357664 |
| 10/26/2013 13:20 | 0 | 264.4588056 | 264.4669728 | 264.462048 | 264.414664 | 264.4357664 |
| 10/26/2013 13:30 | 0 | 264.4588056 | 264.4659728 | 264.460048 | 264.411664 | 264.4347664 |
| 10/26/2013 13:40 | 0 | 264.458196  | 264.4669728 | 264.459048 | 264.412664 | 264.4337664 |
| 10/26/2013 13:50 | 0 | 264.4588056 | 264.4649728 | 264.460048 | 264.413664 | 264.4367664 |
| 10/26/2013 14:00 | 0 | 264.458196  | 264.4629728 | 264.458048 | 264.412664 | 264.4337664 |
| 10/26/2013 14:10 | 0 | 264.4575864 | 264.4629728 | 264.458048 | 264.413664 | 264.4347664 |
| 10/26/2013 14:20 | 0 | 264.456672  | 264.4609728 | 264.456048 | 264.413664 | 264.4347664 |
| 10/26/2013 14:30 | 0 | 264.4557576 | 264.4599728 | 264.454048 | 264.410664 | 264.4317664 |
| 10/26/2013 14:40 | 0 | 264.4545384 | 264.4559728 | 264.452048 | 264.415664 | 264.4327664 |
| 10/26/2013 14:50 | 0 | 264.4539288 | 264.4559728 | 264.451048 | 264.413664 | 264.4307664 |
| 10/26/2013 15:00 | 0 | 264.4530144 | 264.4569728 | 264.450048 | 264.412664 | 264.4327664 |
| 10/26/2013 15:10 | 0 | 264.4517952 | 264.4529728 | 264.446048 | 264.413664 | 264.4297664 |
| 10/26/2013 15:20 | 0 | 264.4514904 | 264.4539728 | 264.450048 | 264.416664 | 264.4307664 |
| 10/26/2013 15:30 | 0 | 264.4511856 | 264.4539728 | 264.448048 | 264.415664 | 264.4297664 |
| 10/26/2013 15:40 | 0 | 264.4508808 | 264.4509728 | 264.446048 | 264.411664 | 264.4277664 |
| 10/26/2013 15:50 | 0 | 264.4502712 | 264.4509728 | 264.447048 | 264.415664 | 264.4297664 |
| 10/26/2013 16:00 | 0 | 264.449052  | 264.4509728 | 264.444048 | 264.415664 | 264.4297664 |
| 10/26/2013 16:10 | 0 | 264.4484424 | 264.4499728 | 264.443048 | 264.413664 | 264.4287664 |
| 10/26/2013 16:20 | 0 | 264.4481376 | 264.4479728 | 264.440048 | 264.413664 | 264.4277664 |
| 10/26/2013 16:30 | 0 | 264.447528  | 264.4499728 | 264.442048 | 264.415664 | 264.4277664 |
| 10/26/2013 16:40 | 0 | 264.4469184 | 264.4499728 | 264.442048 | 264.413664 | 264.4277664 |
| 10/26/2013 16:50 | 0 | 264.4466136 | 264.4479728 | 264.440048 | 264.415664 | 264.4257664 |
| 10/26/2013 17:00 | 0 | 264.4463088 | 264.4459728 | 264.439048 | 264.415664 | 264.4277664 |
| 10/26/2013 17:10 | 0 | 264.446004  | 264.4489728 | 264.440048 | 264.416664 | 264.4287664 |
| 10/26/2013 17:20 | 0 | 264.4453944 | 264.4469728 | 264.439048 | 264.413664 | 264.4267664 |
| 10/26/2013 17:30 | 0 | 264.4453944 | 264.4449728 | 264.439048 | 264.413664 | 264.4277664 |
| 10/26/2013 17:40 | 0 | 264.4453944 | 264.4439728 | 264.438048 | 264.416664 | 264.4267664 |
| 10/26/2013 17:50 | 0 | 264.4450896 | 264.4449728 | 264.439048 | 264.416664 | 264.4247664 |
| 10/26/2013 18:00 | 0 | 264.44448   | 264.4439728 | 264.436048 | 264.416664 | 264.4247664 |
| 10/26/2013 18:10 | 0 | 264.4441752 | 264.4439728 | 264.436048 | 264.414664 | 264.4237664 |
| 10/26/2013 18:20 | 0 | 264.4441752 | 264.4439728 | 264.436048 | 264.416664 | 264.4257664 |
| 10/26/2013 18:30 | 0 | 264.4441752 | 264.4439728 | 264.436048 | 264.414664 | 264.4267664 |

|                  |   |             |             |            |            |             |
|------------------|---|-------------|-------------|------------|------------|-------------|
| 10/26/2013 18:40 | 0 | 264.4438704 | 264.4439728 | 264.438048 | 264.414664 | 264.4257664 |
| 10/26/2013 18:50 | 0 | 264.4441752 | 264.4459728 | 264.438048 | 264.416664 | 264.4267664 |
| 10/26/2013 19:00 | 0 | 264.4441752 | 264.4459728 | 264.438048 | 264.416664 | 264.4267664 |
| 10/26/2013 19:10 | 0 | 264.4441752 | 264.4429728 | 264.437048 | 264.415664 | 264.4257664 |
| 10/26/2013 19:20 | 0 | 264.4432608 | 264.4389728 | 264.438048 | 264.414664 | 264.4257664 |
| 10/26/2013 19:30 | 0 | 264.441432  | 264.4409728 | 264.434048 | 264.415664 | 264.4237664 |
| 10/26/2013 19:40 | 0 | 264.441432  | 264.4409728 | 264.432048 | 264.413664 | 264.4227664 |
| 10/26/2013 19:50 | 0 | 264.4420416 | 264.4409728 | 264.435048 | 264.415664 | 264.4227664 |
| 10/26/2013 20:00 | 0 | 264.4420416 | 264.4399728 | 264.434048 | 264.413664 | 264.4247664 |
| 10/26/2013 20:10 | 0 | 264.4420416 | 264.4399728 | 264.435048 | 264.415664 | 264.4247664 |
| 10/26/2013 20:20 | 0 | 264.4417368 | 264.4399728 | 264.434048 | 264.413664 | 264.4227664 |
| 10/26/2013 20:30 | 0 | 264.441432  | 264.4409728 | 264.436048 | 264.415664 | 264.4257664 |
| 10/26/2013 20:40 | 0 | 264.4411272 | 264.4409728 | 264.435048 | 264.416664 | 264.4257664 |
| 10/26/2013 20:50 | 0 | 264.4411272 | 264.4389728 | 264.434048 | 264.417664 | 264.4237664 |
| 10/26/2013 21:00 | 0 | 264.4411272 | 264.4399728 | 264.434048 | 264.415664 | 264.4247664 |
| 10/26/2013 21:10 | 0 | 264.4408224 | 264.4399728 | 264.433048 | 264.416664 | 264.4227664 |
| 10/26/2013 21:20 | 0 | 264.4405176 | 264.4399728 | 264.435048 | 264.416664 | 264.4247664 |
| 10/26/2013 21:30 | 0 | 264.4402128 | 264.4399728 | 264.433048 | 264.414664 | 264.4247664 |
| 10/26/2013 21:40 | 0 | 264.439908  | 264.4379728 | 264.431048 | 264.414664 | 264.4237664 |
| 10/26/2013 21:50 | 0 | 264.4396032 | 264.4399728 | 264.431048 | 264.415664 | 264.4247664 |
| 10/26/2013 22:00 | 0 | 264.4396032 | 264.4399728 | 264.431048 | 264.414664 | 264.4227664 |
| 10/26/2013 22:10 | 0 | 264.4392984 | 264.4379728 | 264.433048 | 264.414664 | 264.4247664 |
| 10/26/2013 22:20 | 0 | 264.4392984 | 264.4369728 | 264.431048 | 264.414664 | 264.4217664 |
| 10/26/2013 22:30 | 0 | 264.4389936 | 264.4349728 | 264.429048 | 264.414664 | 264.4217664 |
| 10/26/2013 22:40 | 0 | 264.4386888 | 264.4349728 | 264.429048 | 264.414664 | 264.4227664 |
| 10/26/2013 22:50 | 0 | 264.4380792 | 264.4359728 | 264.429048 | 264.415664 | 264.4247664 |
| 10/26/2013 23:00 | 0 | 264.4374696 | 264.4369728 | 264.429048 | 264.416664 | 264.4227664 |
| 10/26/2013 23:10 | 0 | 264.43686   | 264.4349728 | 264.429048 | 264.417664 | 264.4227664 |
| 10/26/2013 23:20 | 0 | 264.4365552 | 264.4329728 | 264.427048 | 264.416664 | 264.4197664 |
| 10/26/2013 23:30 | 0 | 264.4359456 | 264.4319728 | 264.424048 | 264.417664 | 264.4197664 |
| 10/26/2013 23:40 | 0 | 264.435336  | 264.4329728 | 264.425048 | 264.415664 | 264.4197664 |
| 10/26/2013 23:50 | 0 | 264.4347264 | 264.4309728 | 264.424048 | 264.416664 | 264.4207664 |
| 10/27/2013 0:00  | 0 | 264.4341168 | 264.4289728 | 264.422048 | 264.416664 | 264.4187664 |
| 10/27/2013 0:10  | 0 | 264.4332024 | 264.4269728 | 264.422048 | 264.414664 | 264.4177664 |
| 10/27/2013 0:20  | 0 | 264.432288  | 264.4259728 | 264.421048 | 264.414664 | 264.4187664 |
| 10/27/2013 0:30  | 0 | 264.4304592 | 264.4209728 | 264.419048 | 264.416664 | 264.4167664 |
| 10/27/2013 0:40  | 0 | 264.4298496 | 264.4169728 | 264.416048 | 264.413664 | 264.4137664 |
| 10/27/2013 0:50  | 0 | 264.4268016 | 264.4219728 | 264.413048 | 264.414664 | 264.4157664 |
| 10/27/2013 1:00  | 0 | 264.427716  | 264.4229728 | 264.414048 | 264.414664 | 264.4137664 |
| 10/27/2013 1:10  | 0 | 264.4271064 | 264.4149728 | 264.413048 | 264.415664 | 264.4117664 |
| 10/27/2013 1:20  | 0 | 264.4249728 | 264.4139728 | 264.410048 | 264.411664 | 264.4097664 |
| 10/27/2013 1:30  | 0 | 264.4222296 | 264.4189728 | 264.410048 | 264.415664 | 264.4127664 |
| 10/27/2013 1:40  | 0 | 264.4237536 | 264.4059728 | 264.409048 | 264.413664 | 264.4097664 |
| 10/27/2013 1:50  | 0 | 264.4204008 | 264.4159728 | 264.407048 | 264.413664 | 264.4097664 |
| 10/27/2013 2:00  | 0 | 264.4222296 | 264.3989728 | 264.406048 | 264.413664 | 264.4057664 |
| 10/27/2013 2:10  | 0 | 264.4182672 | 264.4149728 | 264.403048 | 264.412664 | 264.4087664 |
| 10/27/2013 2:20  | 0 | 264.418572  | 264.4019728 | 264.401048 | 264.412664 | 264.4047664 |



|                  |   |             |             |            |            |             |
|------------------|---|-------------|-------------|------------|------------|-------------|
| 10/27/2013 2:30  | 0 | 264.4164384 | 264.4059728 | 264.401048 | 264.412664 | 264.4057664 |
| 10/27/2013 2:40  | 0 | 264.4133904 | 264.4019728 | 264.398048 | 264.417664 | 264.4047664 |
| 10/27/2013 2:50  | 0 | 264.4127808 | 264.3959728 | 264.394048 | 264.412664 | 264.3997664 |
| 10/27/2013 3:00  | 0 | 264.4106472 | 264.4069728 | 264.395048 | 264.413664 | 264.4027664 |
| 10/27/2013 3:10  | 0 | 264.4100376 | 264.4029728 | 264.394048 | 264.412664 | 264.4027664 |
| 10/27/2013 3:20  | 0 | 264.4103424 | 264.3929728 | 264.393048 | 264.411664 | 264.3987664 |
| 10/27/2013 3:30  | 0 | 264.4082088 | 264.3959728 | 264.392048 | 264.411664 | 264.4007664 |
| 10/27/2013 3:40  | 0 | 264.4072944 | 264.3969728 | 264.390048 | 264.413664 | 264.3987664 |
| 10/27/2013 3:50  | 0 | 264.4057704 | 264.3979728 | 264.387048 | 264.411664 | 264.3987664 |
| 10/27/2013 4:00  | 0 | 264.4060752 | 264.3939728 | 264.388048 | 264.412664 | 264.3967664 |
| 10/27/2013 4:10  | 0 | 264.4054656 | 264.3879728 | 264.388048 | 264.414664 | 264.3947664 |
| 10/27/2013 4:20  | 0 | 264.4036368 | 264.3929728 | 264.388048 | 264.412664 | 264.3967664 |
| 10/27/2013 4:30  | 0 | 264.4021128 | 264.3959728 | 264.386048 | 264.413664 | 264.3947664 |
| 10/27/2013 4:40  | 0 | 264.4015032 | 264.3939728 | 264.384048 | 264.411664 | 264.3927664 |
| 10/27/2013 4:50  | 0 | 264.4015032 | 264.3919728 | 264.386048 | 264.411664 | 264.3927664 |
| 10/27/2013 5:00  | 0 | 264.4015032 | 264.3849728 | 264.387048 | 264.414664 | 264.3937664 |
| 10/27/2013 5:10  | 0 | 264.3996744 | 264.3889728 | 264.385048 | 264.412664 | 264.3927664 |
| 10/27/2013 5:20  | 0 | 264.3999792 | 264.3869728 | 264.385048 | 264.411664 | 264.3907664 |
| 10/27/2013 5:30  | 0 | 264.3981504 | 264.3939728 | 264.384048 | 264.412664 | 264.3927664 |
| 10/27/2013 5:40  | 0 | 264.3978456 | 264.3889728 | 264.382048 | 264.411664 | 264.3927664 |
| 10/27/2013 5:50  | 0 | 264.39876   | 264.3849728 | 264.385048 | 264.412664 | 264.3907664 |
| 10/27/2013 6:00  | 0 | 264.3963216 | 264.3949728 | 264.382048 | 264.411664 | 264.3927664 |
| 10/27/2013 6:10  | 0 | 264.3984552 | 264.3839728 | 264.381048 | 264.409664 | 264.3887664 |
| 10/27/2013 6:20  | 0 | 264.395712  | 264.3899728 | 264.381048 | 264.409664 | 264.3887664 |
| 10/27/2013 6:30  | 0 | 264.3966264 | 264.3889728 | 264.379048 | 264.409664 | 264.3897664 |
| 10/27/2013 6:40  | 0 | 264.3954072 | 264.3869728 | 264.378048 | 264.409664 | 264.3877664 |
| 10/27/2013 6:50  | 0 | 264.3966264 | 264.3839728 | 264.380048 | 264.407664 | 264.3867664 |
| 10/27/2013 7:00  | 0 | 264.3954072 | 264.3879728 | 264.383048 | 264.410664 | 264.3897664 |
| 10/27/2013 7:10  | 0 | 264.3951024 | 264.3879728 | 264.379048 | 264.408664 | 264.3887664 |
| 10/27/2013 7:20  | 0 | 264.3963216 | 264.3889728 | 264.380048 | 264.405664 | 264.3867664 |
| 10/27/2013 7:30  | 0 | 264.3966264 | 264.3899728 | 264.381048 | 264.408664 | 264.3887664 |
| 10/27/2013 7:40  | 0 | 264.3966264 | 264.3869728 | 264.383048 | 264.407664 | 264.3887664 |
| 10/27/2013 7:50  | 0 | 264.3951024 | 264.3919728 | 264.381048 | 264.407664 | 264.3887664 |
| 10/27/2013 8:00  | 0 | 264.3975408 | 264.3879728 | 264.384048 | 264.407664 | 264.3887664 |
| 10/27/2013 8:10  | 0 | 264.3966264 | 264.3949728 | 264.384048 | 264.407664 | 264.3857664 |
| 10/27/2013 8:20  | 0 | 264.3984552 | 264.3969728 | 264.385048 | 264.407664 | 264.3867664 |
| 10/27/2013 8:30  | 0 | 264.3999792 | 264.4009728 | 264.388048 | 264.405664 | 264.3897664 |
| 10/27/2013 8:40  | 0 | 264.401808  | 264.3979728 | 264.388048 | 264.405664 | 264.3887664 |
| 10/27/2013 8:50  | 0 | 264.4039416 | 264.3979728 | 264.393048 | 264.407664 | 264.3907664 |
| 10/27/2013 9:00  | 0 | 264.4045512 | 264.4169728 | 264.397048 | 264.406664 | 264.3947664 |
| 10/27/2013 9:10  | 0 | 264.407904  | 264.4189728 | 264.400048 | 264.408664 | 264.3977664 |
| 10/27/2013 9:20  | 0 | 264.4106472 | 264.4109728 | 264.400048 | 264.408664 | 264.3947664 |
| 10/27/2013 9:30  | 0 | 264.412476  | 264.4099728 | 264.404048 | 264.407664 | 264.3957664 |
| 10/27/2013 9:40  | 0 | 264.4136952 | 264.4189728 | 264.407048 | 264.406664 | 264.3977664 |
| 10/27/2013 9:50  | 0 | 264.4167432 | 264.4279728 | 264.412048 | 264.407664 | 264.4037664 |
| 10/27/2013 10:00 | 0 | 264.4194864 | 264.4329728 | 264.415048 | 264.407664 | 264.4057664 |
| 10/27/2013 10:10 | 0 | 264.4228392 | 264.4339728 | 264.421048 | 264.406664 | 264.4067664 |

|                  |   |             |             |            |            |             |
|------------------|---|-------------|-------------|------------|------------|-------------|
| 10/27/2013 10:20 | 0 | 264.4264968 | 264.4319728 | 264.423048 | 264.406664 | 264.4097664 |
| 10/27/2013 10:30 | 0 | 264.427716  | 264.4469728 | 264.426048 | 264.404664 | 264.4117664 |
| 10/27/2013 10:40 | 0 | 264.4310688 | 264.4439728 | 264.427048 | 264.404664 | 264.4117664 |
| 10/27/2013 10:50 | 0 | 264.4335072 | 264.4499728 | 264.434048 | 264.404664 | 264.4147664 |
| 10/27/2013 11:00 | 0 | 264.435336  | 264.4519728 | 264.436048 | 264.405664 | 264.4157664 |
| 10/27/2013 11:10 | 0 | 264.4386888 | 264.4549728 | 264.441048 | 264.406664 | 264.4207664 |
| 10/27/2013 11:20 | 0 | 264.4411272 | 264.4589728 | 264.444048 | 264.406664 | 264.4227664 |
| 10/27/2013 11:30 | 0 | 264.4441752 | 264.4609728 | 264.446048 | 264.405664 | 264.4247664 |
| 10/27/2013 11:40 | 0 | 264.4466136 | 264.4639728 | 264.452048 | 264.405664 | 264.4287664 |
| 10/27/2013 11:50 | 0 | 264.4484424 | 264.4619728 | 264.451048 | 264.405664 | 264.4267664 |
| 10/27/2013 12:00 | 0 | 264.4499664 | 264.4649728 | 264.453048 | 264.407664 | 264.4267664 |
| 10/27/2013 12:10 | 0 | 264.4511856 | 264.4679728 | 264.456048 | 264.406664 | 264.4297664 |
| 10/27/2013 12:20 | 0 | 264.4539288 | 264.4679728 | 264.460048 | 264.409664 | 264.4307664 |
| 10/27/2013 12:30 | 0 | 264.4557576 | 264.4699728 | 264.462048 | 264.408664 | 264.4317664 |
| 10/27/2013 12:40 | 0 | 264.4560624 | 264.4689728 | 264.459048 | 264.408664 | 264.4317664 |
| 10/27/2013 12:50 | 0 | 264.4569768 | 264.4649728 | 264.460048 | 264.406664 | 264.4307664 |
| 10/27/2013 13:00 | 0 | 264.4572816 | 264.4679728 | 264.461048 | 264.408664 | 264.4317664 |
| 10/27/2013 13:10 | 0 | 264.4575864 | 264.4739728 | 264.462048 | 264.409664 | 264.4327664 |
| 10/27/2013 13:20 | 0 | 264.4594152 | 264.4699728 | 264.462048 | 264.407664 | 264.4347664 |
| 10/27/2013 13:30 | 0 | 264.4606344 | 264.4699728 | 264.462048 | 264.408664 | 264.4337664 |
| 10/27/2013 13:40 | 0 | 264.4594152 | 264.4659728 | 264.462048 | 264.411664 | 264.4347664 |
| 10/27/2013 13:50 | 0 | 264.4588056 | 264.4629728 | 264.457048 | 264.408664 | 264.4317664 |
| 10/27/2013 14:00 | 0 | 264.4591104 | 264.4749728 | 264.460048 | 264.411664 | 264.4357664 |
| 10/27/2013 14:10 | 0 | 264.461244  | 264.4749728 | 264.464048 | 264.410664 | 264.4377664 |
| 10/27/2013 14:20 | 0 | 264.4615488 | 264.4669728 | 264.463048 | 264.410664 | 264.4337664 |
| 10/27/2013 14:30 | 0 | 264.4606344 | 264.4669728 | 264.460048 | 264.410664 | 264.4337664 |
| 10/27/2013 14:40 | 0 | 264.4603296 | 264.4659728 | 264.460048 | 264.409664 | 264.4347664 |
| 10/27/2013 14:50 | 0 | 264.45972   | 264.4609728 | 264.457048 | 264.412664 | 264.4347664 |
| 10/27/2013 15:00 | 0 | 264.4578912 | 264.4589728 | 264.456048 | 264.411664 | 264.4327664 |
| 10/27/2013 15:10 | 0 | 264.4560624 | 264.4609728 | 264.453048 | 264.410664 | 264.4347664 |
| 10/27/2013 15:20 | 0 | 264.4563672 | 264.4639728 | 264.455048 | 264.411664 | 264.4357664 |
| 10/27/2013 15:30 | 0 | 264.4563672 | 264.4619728 | 264.454048 | 264.411664 | 264.4357664 |
| 10/27/2013 15:40 | 0 | 264.4569768 | 264.4619728 | 264.454048 | 264.411664 | 264.4357664 |
| 10/27/2013 15:50 | 0 | 264.4569768 | 264.4619728 | 264.455048 | 264.412664 | 264.4387664 |
| 10/27/2013 16:00 | 0 | 264.4560624 | 264.4609728 | 264.455048 | 264.414664 | 264.4367664 |
| 10/27/2013 16:10 | 0 | 264.455148  | 264.4549728 | 264.451048 | 264.412664 | 264.4337664 |
| 10/27/2013 16:20 | 0 | 264.4542336 | 264.4549728 | 264.452048 | 264.410664 | 264.4327664 |
| 10/27/2013 16:30 | 0 | 264.4533192 | 264.4529728 | 264.450048 | 264.412664 | 264.4337664 |
| 10/27/2013 16:40 | 0 | 264.4527096 | 264.4529728 | 264.448048 | 264.415664 | 264.4337664 |
| 10/27/2013 16:50 | 0 | 264.4514904 | 264.4479728 | 264.447048 | 264.413664 | 264.4317664 |
| 10/27/2013 17:00 | 0 | 264.450576  | 264.4509728 | 264.446048 | 264.414664 | 264.4317664 |
| 10/27/2013 17:10 | 0 | 264.4496616 | 264.4489728 | 264.444048 | 264.413664 | 264.4307664 |
| 10/27/2013 17:20 | 0 | 264.4493568 | 264.4489728 | 264.444048 | 264.413664 | 264.4317664 |
| 10/27/2013 17:30 | 0 | 264.4484424 | 264.4499728 | 264.443048 | 264.415664 | 264.4327664 |
| 10/27/2013 17:40 | 0 | 264.4484424 | 264.4479728 | 264.443048 | 264.412664 | 264.4307664 |
| 10/27/2013 17:50 | 0 | 264.4481376 | 264.4499728 | 264.444048 | 264.414664 | 264.4327664 |
| 10/27/2013 18:00 | 0 | 264.447528  | 264.4479728 | 264.443048 | 264.415664 | 264.4327664 |

|                  |   |             |             |            |            |             |
|------------------|---|-------------|-------------|------------|------------|-------------|
| 10/27/2013 18:10 | 0 | 264.4472232 | 264.4499728 | 264.444048 | 264.417664 | 264.4327664 |
| 10/27/2013 18:20 | 0 | 264.4472232 | 264.4489728 | 264.443048 | 264.413664 | 264.4317664 |
| 10/27/2013 18:30 | 0 | 264.4469184 | 264.4489728 | 264.443048 | 264.415664 | 264.4317664 |
| 10/27/2013 18:40 | 0 | 264.4469184 | 264.4459728 | 264.443048 | 264.415664 | 264.4307664 |
| 10/27/2013 18:50 | 0 | 264.4466136 | 264.4459728 | 264.443048 | 264.417664 | 264.4307664 |
| 10/27/2013 19:00 | 0 | 264.4466136 | 264.4489728 | 264.443048 | 264.417664 | 264.4327664 |
| 10/27/2013 19:10 | 0 | 264.4469184 | 264.4479728 | 264.443048 | 264.416664 | 264.4317664 |
| 10/27/2013 19:20 | 0 | 264.447528  | 264.4499728 | 264.442048 | 264.415664 | 264.4317664 |
| 10/27/2013 19:30 | 0 | 264.4478328 | 264.4529728 | 264.444048 | 264.415664 | 264.4337664 |
| 10/27/2013 19:40 | 0 | 264.4487472 | 264.4519728 | 264.444048 | 264.415664 | 264.4317664 |
| 10/27/2013 19:50 | 0 | 264.4496616 | 264.4559728 | 264.445048 | 264.416664 | 264.4327664 |
| 10/27/2013 20:00 | 0 | 264.4502712 | 264.4559728 | 264.446048 | 264.414664 | 264.4327664 |
| 10/27/2013 20:10 | 0 | 264.4511856 | 264.4559728 | 264.446048 | 264.415664 | 264.4337664 |
| 10/27/2013 20:20 | 0 | 264.4521    | 264.4569728 | 264.448048 | 264.415664 | 264.4337664 |
| 10/27/2013 20:30 | 0 | 264.4524048 | 264.4579728 | 264.449048 | 264.415664 | 264.4337664 |
| 10/27/2013 20:40 | 0 | 264.4533192 | 264.4569728 | 264.449048 | 264.416664 | 264.4337664 |
| 10/27/2013 20:50 | 0 | 264.4542336 | 264.4619728 | 264.452048 | 264.416664 | 264.4357664 |
| 10/27/2013 21:00 | 0 | 264.4545384 | 264.4629728 | 264.454048 | 264.417664 | 264.4387664 |
| 10/27/2013 21:10 | 0 | 264.4554528 | 264.4639728 | 264.456048 | 264.418664 | 264.4397664 |
| 10/27/2013 21:20 | 0 | 264.456672  | 264.4639728 | 264.455048 | 264.416664 | 264.4377664 |
| 10/27/2013 21:30 | 0 | 264.4572816 | 264.4639728 | 264.457048 | 264.417664 | 264.4367664 |
| 10/27/2013 21:40 | 0 | 264.4575864 | 264.4629728 | 264.457048 | 264.416664 | 264.4367664 |
| 10/27/2013 21:50 | 0 | 264.4578912 | 264.4629728 | 264.457048 | 264.419664 | 264.4387664 |
| 10/27/2013 22:00 | 0 | 264.458196  | 264.4649728 | 264.457048 | 264.418664 | 264.4397664 |
| 10/27/2013 22:10 | 0 | 264.458196  | 264.4619728 | 264.455048 | 264.418664 | 264.4377664 |
| 10/27/2013 22:20 | 0 | 264.458196  | 264.4619728 | 264.455048 | 264.417664 | 264.4377664 |
| 10/27/2013 22:30 | 0 | 264.4575864 | 264.4619728 | 264.455048 | 264.419664 | 264.4387664 |
| 10/27/2013 22:40 | 0 | 264.4572816 | 264.4599728 | 264.453048 | 264.416664 | 264.4377664 |
| 10/27/2013 22:50 | 0 | 264.4569768 | 264.4589728 | 264.454048 | 264.418664 | 264.4407664 |
| 10/27/2013 23:00 | 0 | 264.4563672 | 264.4559728 | 264.454048 | 264.420664 | 264.4377664 |
| 10/27/2013 23:10 | 0 | 264.455148  | 264.4549728 | 264.454048 | 264.419664 | 264.4387664 |
| 10/27/2013 23:20 | 0 | 264.4545384 | 264.4539728 | 264.451048 | 264.420664 | 264.4367664 |
| 10/27/2013 23:30 | 0 | 264.4527096 | 264.4509728 | 264.447048 | 264.419664 | 264.4327664 |
| 10/27/2013 23:40 | 0 | 264.4511856 | 264.4479728 | 264.444048 | 264.420664 | 264.4337664 |
| 10/27/2013 23:50 | 0 | 264.4493568 | 264.4449728 | 264.441048 | 264.419664 | 264.4307664 |
| 10/28/2013 0:00  | 0 | 264.447528  | 264.4429728 | 264.439048 | 264.419664 | 264.4307664 |
| 10/28/2013 0:10  | 0 | 264.446004  | 264.4399728 | 264.438048 | 264.419664 | 264.4307664 |
| 10/28/2013 0:20  | 0 | 264.44448   | 264.4379728 | 264.436048 | 264.420664 | 264.4287664 |
| 10/28/2013 0:30  | 0 | 264.442956  | 264.4329728 | 264.432048 | 264.420664 | 264.4287664 |
| 10/28/2013 0:40  | 0 | 264.441432  | 264.4349728 | 264.431048 | 264.420664 | 264.4267664 |
| 10/28/2013 0:50  | 0 | 264.4396032 | 264.4279728 | 264.428048 | 264.419664 | 264.4257664 |
| 10/28/2013 1:00  | 0 | 264.4377744 | 264.4259728 | 264.427048 | 264.420664 | 264.4237664 |
| 10/28/2013 1:10  | 0 | 264.4356408 | 264.4239728 | 264.421048 | 264.415664 | 264.4227664 |
| 10/28/2013 1:20  | 0 | 264.4332024 | 264.4189728 | 264.419048 | 264.415664 | 264.4187664 |
| 10/28/2013 1:30  | 0 | 264.430764  | 264.4139728 | 264.415048 | 264.417664 | 264.4187664 |
| 10/28/2013 1:40  | 0 | 264.4286304 | 264.4139728 | 264.413048 | 264.419664 | 264.4177664 |
| 10/28/2013 1:50  | 0 | 264.4264968 | 264.4089728 | 264.411048 | 264.417664 | 264.4147664 |

|                 |   |             |             |            |            |             |
|-----------------|---|-------------|-------------|------------|------------|-------------|
| 10/28/2013 2:00 | 0 | 264.424668  | 264.4099728 | 264.408048 | 264.416664 | 264.4147664 |
| 10/28/2013 2:10 | 0 | 264.423144  | 264.4029728 | 264.404048 | 264.416664 | 264.4097664 |
| 10/28/2013 2:20 | 0 | 264.4204008 | 264.4099728 | 264.402048 | 264.417664 | 264.4117664 |
| 10/28/2013 2:30 | 0 | 264.420096  | 264.4019728 | 264.401048 | 264.417664 | 264.4087664 |
| 10/28/2013 2:40 | 0 | 264.4176576 | 264.3999728 | 264.398048 | 264.417664 | 264.4107664 |
| 10/28/2013 2:50 | 0 | 264.4146096 | 264.3939728 | 264.394048 | 264.416664 | 264.4057664 |
| 10/28/2013 3:00 | 0 | 264.4130856 | 264.4009728 | 264.394048 | 264.416664 | 264.4067664 |
| 10/28/2013 3:10 | 0 | 264.4115616 | 264.3999728 | 264.391048 | 264.418664 | 264.4047664 |
| 10/28/2013 3:20 | 0 | 264.4112568 | 264.3949728 | 264.393048 | 264.416664 | 264.4027664 |
| 10/28/2013 3:30 | 0 | 264.409428  | 264.4009728 | 264.391048 | 264.418664 | 264.4047664 |
| 10/28/2013 3:40 | 0 | 264.4091232 | 264.3929728 | 264.389048 | 264.416664 | 264.3997664 |
| 10/28/2013 3:50 | 0 | 264.4075992 | 264.3929728 | 264.389048 | 264.416664 | 264.4007664 |
| 10/28/2013 4:00 | 0 | 264.4057704 | 264.3949728 | 264.387048 | 264.415664 | 264.3997664 |
| 10/28/2013 4:10 | 0 | 264.404856  | 264.3949728 | 264.387048 | 264.418664 | 264.3987664 |
| 10/28/2013 4:20 | 0 | 264.404856  | 264.3919728 | 264.387048 | 264.418664 | 264.3987664 |
| 10/28/2013 4:30 | 0 | 264.4045512 | 264.3899728 | 264.386048 | 264.415664 | 264.3967664 |
| 10/28/2013 4:40 | 0 | 264.4036368 | 264.3939728 | 264.388048 | 264.419664 | 264.3997664 |
| 10/28/2013 4:50 | 0 | 264.403332  | 264.3939728 | 264.386048 | 264.416664 | 264.3967664 |
| 10/28/2013 5:00 | 0 | 264.4024176 | 264.3949728 | 264.387048 | 264.417664 | 264.3977664 |
| 10/28/2013 5:10 | 0 | 264.4030272 | 264.3919728 | 264.386048 | 264.417664 | 264.3977664 |
| 10/28/2013 5:20 | 0 | 264.4021128 | 264.3829728 | 264.385048 | 264.416664 | 264.3927664 |
| 10/28/2013 5:30 | 0 | 264.400284  | 264.3929728 | 264.384048 | 264.416664 | 264.3947664 |
| 10/28/2013 5:40 | 0 | 264.3993696 | 264.3899728 | 264.383048 | 264.413664 | 264.3937664 |
| 10/28/2013 5:50 | 0 | 264.39876   | 264.3919728 | 264.383048 | 264.413664 | 264.3927664 |
| 10/28/2013 6:00 | 0 | 264.3993696 | 264.3889728 | 264.380048 | 264.412664 | 264.3897664 |
| 10/28/2013 6:10 | 0 | 264.3990648 | 264.3839728 | 264.381048 | 264.412664 | 264.3887664 |
| 10/28/2013 6:20 | 0 | 264.3981504 | 264.3919728 | 264.384048 | 264.414664 | 264.3927664 |
| 10/28/2013 6:30 | 0 | 264.3978456 | 264.3959728 | 264.384048 | 264.416664 | 264.3927664 |
| 10/28/2013 6:40 | 0 | 264.39876   | 264.3929728 | 264.382048 | 264.412664 | 264.3907664 |
| 10/28/2013 6:50 | 0 | 264.400284  | 264.3919728 | 264.385048 | 264.414664 | 264.3887664 |
| 10/28/2013 7:00 | 0 | 264.4005888 | 264.3969728 | 264.386048 | 264.413664 | 264.3907664 |
| 10/28/2013 7:10 | 0 | 264.4011984 | 264.4039728 | 264.389048 | 264.410664 | 264.3937664 |
| 10/28/2013 7:20 | 0 | 264.4051608 | 264.4169728 | 264.394048 | 264.410664 | 264.3967664 |
| 10/28/2013 7:30 | 0 | 264.410952  | 264.4059728 | 264.397048 | 264.409664 | 264.3947664 |
| 10/28/2013 7:40 | 0 | 264.4115616 | 264.4119728 | 264.399048 | 264.410664 | 264.3947664 |
| 10/28/2013 7:50 | 0 | 264.4133904 | 264.4249728 | 264.406048 | 264.411664 | 264.4007664 |
| 10/28/2013 8:00 | 0 | 264.4182672 | 264.4199728 | 264.409048 | 264.410664 | 264.3997664 |
| 10/28/2013 8:10 | 0 | 264.4194864 | 264.4359728 | 264.414048 | 264.410664 | 264.4047664 |
| 10/28/2013 8:20 | 0 | 264.4249728 | 264.4349728 | 264.421048 | 264.409664 | 264.4087664 |
| 10/28/2013 8:30 | 0 | 264.4264968 | 264.4369728 | 264.422048 | 264.409664 | 264.4067664 |
| 10/28/2013 8:40 | 0 | 264.4304592 | 264.4509728 | 264.428048 | 264.409664 | 264.4137664 |
| 10/28/2013 8:50 | 0 | 264.4350312 | 264.4519728 | 264.436048 | 264.409664 | 264.4177664 |
| 10/28/2013 9:00 | 0 | 264.4389936 | 264.4579728 | 264.440048 | 264.408664 | 264.4197664 |
| 10/28/2013 9:10 | 0 | 264.4420416 | 264.4589728 | 264.446048 | 264.412664 | 264.4217664 |
| 10/28/2013 9:20 | 0 | 264.44448   | 264.4579728 | 264.448048 | 264.409664 | 264.4237664 |
| 10/28/2013 9:30 | 0 | 264.446004  | 264.4659728 | 264.451048 | 264.410664 | 264.4267664 |
| 10/28/2013 9:40 | 0 | 264.4484424 | 264.4629728 | 264.452048 | 264.411664 | 264.4257664 |

|                  |   |             |             |            |            |             |
|------------------|---|-------------|-------------|------------|------------|-------------|
| 10/28/2013 9:50  | 0 | 264.4502712 | 264.4619728 | 264.454048 | 264.412664 | 264.4277664 |
| 10/28/2013 10:00 | 0 | 264.4508808 | 264.4639728 | 264.454048 | 264.412664 | 264.4277664 |
| 10/28/2013 10:10 | 0 | 264.4514904 | 264.4619728 | 264.454048 | 264.412664 | 264.4297664 |
| 10/28/2013 10:20 | 0 | 264.4517952 | 264.4559728 | 264.450048 | 264.412664 | 264.4267664 |
| 10/28/2013 10:30 | 0 | 264.4508808 | 264.4589728 | 264.451048 | 264.413664 | 264.4297664 |
| 10/28/2013 10:40 | 0 | 264.4502712 | 264.4529728 | 264.448048 | 264.412664 | 264.4277664 |
| 10/28/2013 10:50 | 0 | 264.4496616 | 264.4529728 | 264.448048 | 264.412664 | 264.4267664 |
| 10/28/2013 11:00 | 0 | 264.449052  | 264.4539728 | 264.448048 | 264.412664 | 264.4287664 |
| 10/28/2013 11:10 | 0 | 264.4493568 | 264.4529728 | 264.445048 | 264.413664 | 264.4267664 |
| 10/28/2013 11:20 | 0 | 264.4496616 | 264.4539728 | 264.445048 | 264.411664 | 264.4297664 |
| 10/28/2013 11:30 | 0 | 264.4499664 | 264.4569728 | 264.448048 | 264.415664 | 264.4327664 |
| 10/28/2013 11:40 | 0 | 264.4499664 | 264.4539728 | 264.445048 | 264.411664 | 264.4297664 |
| 10/28/2013 11:50 | 0 | 264.4493568 | 264.4509728 | 264.444048 | 264.412664 | 264.4297664 |
| 10/28/2013 12:00 | 0 | 264.4481376 | 264.4489728 | 264.444048 | 264.414664 | 264.4297664 |
| 10/28/2013 12:10 | 0 | 264.4469184 | 264.4459728 | 264.441048 | 264.414664 | 264.4297664 |
| 10/28/2013 12:20 | 0 | 264.446004  | 264.4459728 | 264.439048 | 264.414664 | 264.4267664 |
| 10/28/2013 12:30 | 0 | 264.4453944 | 264.4439728 | 264.439048 | 264.413664 | 264.4277664 |
| 10/28/2013 12:40 | 0 | 264.44448   | 264.4459728 | 264.437048 | 264.414664 | 264.4267664 |
| 10/28/2013 12:50 | 0 | 264.4435656 | 264.4439728 | 264.437048 | 264.413664 | 264.4277664 |
| 10/28/2013 13:00 | 0 | 264.4432608 | 264.4439728 | 264.436048 | 264.413664 | 264.4257664 |
| 10/28/2013 13:10 | 0 | 264.442956  | 264.4439728 | 264.435048 | 264.413664 | 264.4237664 |
| 10/28/2013 13:20 | 0 | 264.4420416 | 264.4419728 | 264.435048 | 264.413664 | 264.4237664 |
| 10/28/2013 13:30 | 0 | 264.4417368 | 264.4449728 | 264.435048 | 264.414664 | 264.4267664 |
| 10/28/2013 13:40 | 0 | 264.4417368 | 264.4429728 | 264.435048 | 264.414664 | 264.4267664 |
| 10/28/2013 13:50 | 0 | 264.4417368 | 264.4449728 | 264.437048 | 264.415664 | 264.4257664 |
| 10/28/2013 14:00 | 0 | 264.441432  | 264.4409728 | 264.435048 | 264.413664 | 264.4247664 |
| 10/28/2013 14:10 | 0 | 264.441432  | 264.4409728 | 264.433048 | 264.413664 | 264.4257664 |
| 10/28/2013 14:20 | 0 | 264.4411272 | 264.4429728 | 264.434048 | 264.415664 | 264.4277664 |
| 10/28/2013 14:30 | 0 | 264.4411272 | 264.4409728 | 264.434048 | 264.413664 | 264.4237664 |
| 10/28/2013 14:40 | 0 | 264.4408224 | 264.4389728 | 264.434048 | 264.415664 | 264.4237664 |
| 10/28/2013 14:50 | 0 | 264.4405176 | 264.4389728 | 264.434048 | 264.415664 | 264.4237664 |
| 10/28/2013 15:00 | 0 | 264.4402128 | 264.4409728 | 264.433048 | 264.414664 | 264.4257664 |
| 10/28/2013 15:10 | 0 | 264.439908  | 264.4419728 | 264.433048 | 264.416664 | 264.4257664 |
| 10/28/2013 15:20 | 0 | 264.439908  | 264.4389728 | 264.433048 | 264.416664 | 264.4237664 |
| 10/28/2013 15:30 | 0 | 264.4392984 | 264.4409728 | 264.433048 | 264.416664 | 264.4237664 |
| 10/28/2013 15:40 | 0 | 264.4386888 | 264.4379728 | 264.430048 | 264.416664 | 264.4227664 |
| 10/28/2013 15:50 | 0 | 264.438384  | 264.4379728 | 264.431048 | 264.416664 | 264.4257664 |
| 10/28/2013 16:00 | 0 | 264.4374696 | 264.4349728 | 264.429048 | 264.415664 | 264.4247664 |
| 10/28/2013 16:10 | 0 | 264.4371648 | 264.4359728 | 264.431048 | 264.417664 | 264.4257664 |
| 10/28/2013 16:20 | 0 | 264.4359456 | 264.4309728 | 264.429048 | 264.414664 | 264.4187664 |
| 10/28/2013 16:30 | 0 | 264.435336  | 264.4309728 | 264.426048 | 264.416664 | 264.4207664 |
| 10/28/2013 16:40 | 0 | 264.4341168 | 264.4279728 | 264.422048 | 264.412664 | 264.4177664 |
| 10/28/2013 16:50 | 0 | 264.4335072 | 264.4289728 | 264.422048 | 264.415664 | 264.4187664 |
| 10/28/2013 17:00 | 0 | 264.4328976 | 264.4289728 | 264.422048 | 264.413664 | 264.4207664 |
| 10/28/2013 17:10 | 0 | 264.4319832 | 264.4259728 | 264.419048 | 264.415664 | 264.4167664 |
| 10/28/2013 17:20 | 0 | 264.4304592 | 264.4289728 | 264.419048 | 264.415664 | 264.4177664 |
| 10/28/2013 17:30 | 0 | 264.4316784 | 264.4309728 | 264.422048 | 264.417664 | 264.4207664 |

|                  |   |             |             |            |            |             |
|------------------|---|-------------|-------------|------------|------------|-------------|
| 10/28/2013 17:40 | 0 | 264.430764  | 264.4299728 | 264.419048 | 264.414664 | 264.4197664 |
| 10/28/2013 17:50 | 0 | 264.4316784 | 264.4279728 | 264.420048 | 264.414664 | 264.4177664 |
| 10/28/2013 18:00 | 0 | 264.4310688 | 264.4309728 | 264.420048 | 264.412664 | 264.4177664 |
| 10/28/2013 18:10 | 0 | 264.4319832 | 264.4309728 | 264.422048 | 264.415664 | 264.4187664 |
| 10/28/2013 18:20 | 0 | 264.4316784 | 264.4179728 | 264.420048 | 264.412664 | 264.4157664 |
| 10/28/2013 18:30 | 0 | 264.42924   | 264.4309728 | 264.418048 | 264.414664 | 264.4177664 |
| 10/28/2013 18:40 | 0 | 264.4316784 | 264.4359728 | 264.423048 | 264.415664 | 264.4197664 |
| 10/28/2013 18:50 | 0 | 264.4332024 | 264.4339728 | 264.423048 | 264.416664 | 264.4167664 |
| 10/28/2013 19:00 | 0 | 264.4335072 | 264.4349728 | 264.424048 | 264.416664 | 264.4187664 |
| 10/28/2013 19:10 | 0 | 264.433812  | 264.4319728 | 264.424048 | 264.414664 | 264.4177664 |
| 10/28/2013 19:20 | 0 | 264.433812  | 264.4329728 | 264.424048 | 264.411664 | 264.4197664 |
| 10/28/2013 19:30 | 0 | 264.4341168 | 264.4339728 | 264.424048 | 264.414664 | 264.4197664 |
| 10/28/2013 19:40 | 0 | 264.4341168 | 264.4369728 | 264.427048 | 264.415664 | 264.4207664 |
| 10/28/2013 19:50 | 0 | 264.4347264 | 264.4359728 | 264.427048 | 264.414664 | 264.4177664 |
| 10/28/2013 20:00 | 0 | 264.4359456 | 264.4379728 | 264.428048 | 264.414664 | 264.4217664 |
| 10/28/2013 20:10 | 0 | 264.43686   | 264.4409728 | 264.431048 | 264.416664 | 264.4237664 |
| 10/28/2013 20:20 | 0 | 264.4380792 | 264.4419728 | 264.431048 | 264.413664 | 264.4217664 |
| 10/28/2013 20:30 | 0 | 264.4392984 | 264.4449728 | 264.435048 | 264.413664 | 264.4247664 |
| 10/28/2013 20:40 | 0 | 264.4408224 | 264.4459728 | 264.436048 | 264.416664 | 264.4267664 |
| 10/28/2013 20:50 | 0 | 264.4423464 | 264.4479728 | 264.437048 | 264.414664 | 264.4267664 |
| 10/28/2013 21:00 | 0 | 264.4435656 | 264.4509728 | 264.440048 | 264.416664 | 264.4267664 |
| 10/28/2013 21:10 | 0 | 264.4447848 | 264.4529728 | 264.443048 | 264.413664 | 264.4287664 |
| 10/28/2013 21:20 | 0 | 264.446004  | 264.4499728 | 264.441048 | 264.414664 | 264.4277664 |
| 10/28/2013 21:30 | 0 | 264.4466136 | 264.4519728 | 264.443048 | 264.415664 | 264.4277664 |
| 10/28/2013 21:40 | 0 | 264.4472232 | 264.4489728 | 264.444048 | 264.416664 | 264.4257664 |
| 10/28/2013 21:50 | 0 | 264.447528  | 264.4489728 | 264.442048 | 264.416664 | 264.4277664 |
| 10/28/2013 22:00 | 0 | 264.447528  | 264.4499728 | 264.442048 | 264.414664 | 264.4277664 |
| 10/28/2013 22:10 | 0 | 264.4481376 | 264.4509728 | 264.442048 | 264.415664 | 264.4287664 |
| 10/28/2013 22:20 | 0 | 264.4487472 | 264.4549728 | 264.445048 | 264.418664 | 264.4307664 |
| 10/28/2013 22:30 | 0 | 264.449052  | 264.4539728 | 264.445048 | 264.416664 | 264.4297664 |
| 10/28/2013 22:40 | 0 | 264.4493568 | 264.4509728 | 264.443048 | 264.416664 | 264.4297664 |
| 10/28/2013 22:50 | 0 | 264.4493568 | 264.4529728 | 264.447048 | 264.419664 | 264.4327664 |
| 10/28/2013 23:00 | 0 | 264.4493568 | 264.4539728 | 264.445048 | 264.416664 | 264.4297664 |
| 10/28/2013 23:10 | 0 | 264.4487472 | 264.4509728 | 264.443048 | 264.417664 | 264.4287664 |
| 10/28/2013 23:20 | 0 | 264.4481376 | 264.4479728 | 264.443048 | 264.419664 | 264.4297664 |
| 10/28/2013 23:30 | 0 | 264.4469184 | 264.4459728 | 264.440048 | 264.417664 | 264.4267664 |
| 10/28/2013 23:40 | 0 | 264.4453944 | 264.4429728 | 264.440048 | 264.414664 | 264.4277664 |
| 10/28/2013 23:50 | 0 | 264.4441752 | 264.4409728 | 264.437048 | 264.419664 | 264.4267664 |
| 10/29/2013 0:00  | 0 | 264.442956  | 264.4409728 | 264.436048 | 264.419664 | 264.4267664 |
| 10/29/2013 0:10  | 0 | 264.441432  | 264.4349728 | 264.432048 | 264.417664 | 264.4237664 |
| 10/29/2013 0:20  | 0 | 264.4396032 | 264.4289728 | 264.429048 | 264.414664 | 264.4207664 |
| 10/29/2013 0:30  | 0 | 264.43686   | 264.4299728 | 264.428048 | 264.418664 | 264.4217664 |
| 10/29/2013 0:40  | 0 | 264.4359456 | 264.4299728 | 264.425048 | 264.418664 | 264.4237664 |
| 10/29/2013 0:50  | 0 | 264.4341168 | 264.4229728 | 264.421048 | 264.416664 | 264.4197664 |
| 10/29/2013 1:00  | 0 | 264.4325928 | 264.4209728 | 264.419048 | 264.418664 | 264.4197664 |
| 10/29/2013 1:10  | 0 | 264.430764  | 264.4199728 | 264.417048 | 264.417664 | 264.4177664 |
| 10/29/2013 1:20  | 0 | 264.4289352 | 264.4109728 | 264.415048 | 264.419664 | 264.4137664 |

|                 |   |             |             |            |            |             |
|-----------------|---|-------------|-------------|------------|------------|-------------|
| 10/29/2013 1:30 | 0 | 264.4255824 | 264.4179728 | 264.412048 | 264.419664 | 264.4157664 |
| 10/29/2013 1:40 | 0 | 264.4249728 | 264.4019728 | 264.409048 | 264.418664 | 264.4097664 |
| 10/29/2013 1:50 | 0 | 264.4210104 | 264.4149728 | 264.405048 | 264.420664 | 264.4127664 |
| 10/29/2013 2:00 | 0 | 264.4219248 | 264.3989728 | 264.404048 | 264.415664 | 264.4077664 |
| 10/29/2013 2:10 | 0 | 264.4182672 | 264.4089728 | 264.401048 | 264.417664 | 264.4077664 |
| 10/29/2013 2:20 | 0 | 264.4173528 | 264.4019728 | 264.400048 | 264.418664 | 264.4077664 |
| 10/29/2013 2:30 | 0 | 264.4167432 | 264.4019728 | 264.400048 | 264.416664 | 264.4077664 |
| 10/29/2013 2:40 | 0 | 264.412476  | 264.3989728 | 264.396048 | 264.418664 | 264.4047664 |
| 10/29/2013 2:50 | 0 | 264.410952  | 264.3969728 | 264.393048 | 264.415664 | 264.4027664 |
| 10/29/2013 3:00 | 0 | 264.4106472 | 264.3919728 | 264.392048 | 264.415664 | 264.4027664 |
| 10/29/2013 3:10 | 0 | 264.4088184 | 264.3919728 | 264.391048 | 264.412664 | 264.4007664 |
| 10/29/2013 3:20 | 0 | 264.4072944 | 264.3959728 | 264.388048 | 264.415664 | 264.4017664 |
| 10/29/2013 3:30 | 0 | 264.40638   | 264.3959728 | 264.387048 | 264.413664 | 264.3997664 |
| 10/29/2013 3:40 | 0 | 264.4060752 | 264.3869728 | 264.387048 | 264.415664 | 264.3987664 |
| 10/29/2013 3:50 | 0 | 264.404856  | 264.3899728 | 264.386048 | 264.415664 | 264.3977664 |
| 10/29/2013 4:00 | 0 | 264.4027224 | 264.3939728 | 264.386048 | 264.412664 | 264.3997664 |
| 10/29/2013 4:10 | 0 | 264.4030272 | 264.3969728 | 264.386048 | 264.413664 | 264.3987664 |
| 10/29/2013 4:20 | 0 | 264.4036368 | 264.3909728 | 264.386048 | 264.413664 | 264.3957664 |
| 10/29/2013 4:30 | 0 | 264.4030272 | 264.3869728 | 264.386048 | 264.413664 | 264.3937664 |
| 10/29/2013 4:40 | 0 | 264.4015032 | 264.3949728 | 264.387048 | 264.416664 | 264.3977664 |
| 10/29/2013 4:50 | 0 | 264.400284  | 264.3919728 | 264.384048 | 264.411664 | 264.3957664 |
| 10/29/2013 5:00 | 0 | 264.401808  | 264.3839728 | 264.386048 | 264.418664 | 264.3947664 |
| 10/29/2013 5:10 | 0 | 264.3981504 | 264.3879728 | 264.382048 | 264.413664 | 264.3927664 |
| 10/29/2013 5:20 | 0 | 264.3981504 | 264.3859728 | 264.381048 | 264.410664 | 264.3907664 |
| 10/29/2013 5:30 | 0 | 264.3975408 | 264.3859728 | 264.380048 | 264.411664 | 264.3897664 |
| 10/29/2013 5:40 | 0 | 264.3969312 | 264.3869728 | 264.382048 | 264.413664 | 264.3937664 |
| 10/29/2013 5:50 | 0 | 264.3960168 | 264.3879728 | 264.379048 | 264.412664 | 264.3887664 |
| 10/29/2013 6:00 | 0 | 264.3960168 | 264.3829728 | 264.381048 | 264.413664 | 264.3907664 |
| 10/29/2013 6:10 | 0 | 264.3960168 | 264.3849728 | 264.379048 | 264.410664 | 264.3877664 |
| 10/29/2013 6:20 | 0 | 264.3944928 | 264.3879728 | 264.379048 | 264.412664 | 264.3877664 |
| 10/29/2013 6:30 | 0 | 264.3951024 | 264.3849728 | 264.378048 | 264.410664 | 264.3877664 |
| 10/29/2013 6:40 | 0 | 264.3947976 | 264.3939728 | 264.380048 | 264.412664 | 264.3907664 |
| 10/29/2013 6:50 | 0 | 264.3966264 | 264.3939728 | 264.380048 | 264.410664 | 264.3887664 |
| 10/29/2013 7:00 | 0 | 264.3978456 | 264.3959728 | 264.384048 | 264.411664 | 264.3907664 |
| 10/29/2013 7:10 | 0 | 264.3990648 | 264.3949728 | 264.383048 | 264.409664 | 264.3887664 |
| 10/29/2013 7:20 | 0 | 264.4005888 | 264.3999728 | 264.387048 | 264.413664 | 264.3917664 |
| 10/29/2013 7:30 | 0 | 264.4008936 | 264.4019728 | 264.387048 | 264.408664 | 264.3927664 |
| 10/29/2013 7:40 | 0 | 264.404856  | 264.4119728 | 264.394048 | 264.411664 | 264.3947664 |
| 10/29/2013 7:50 | 0 | 264.4103424 | 264.4119728 | 264.398048 | 264.409664 | 264.3987664 |
| 10/29/2013 8:00 | 0 | 264.4127808 | 264.4209728 | 264.405048 | 264.411664 | 264.3997664 |
| 10/29/2013 8:10 | 0 | 264.4158288 | 264.4249728 | 264.408048 | 264.408664 | 264.4017664 |
| 10/29/2013 8:20 | 0 | 264.4194864 | 264.4379728 | 264.414048 | 264.411664 | 264.4067664 |
| 10/29/2013 8:30 | 0 | 264.4258872 | 264.4389728 | 264.421048 | 264.410664 | 264.4117664 |
| 10/29/2013 8:40 | 0 | 264.4289352 | 264.4509728 | 264.425048 | 264.409664 | 264.4137664 |
| 10/29/2013 8:50 | 0 | 264.4332024 | 264.4439728 | 264.431048 | 264.410664 | 264.4147664 |
| 10/29/2013 9:00 | 0 | 264.4356408 | 264.4589728 | 264.437048 | 264.410664 | 264.4197664 |
| 10/29/2013 9:10 | 0 | 264.439908  | 264.4659728 | 264.444048 | 264.412664 | 264.4217664 |

|                  |   |             |             |            |            |             |
|------------------|---|-------------|-------------|------------|------------|-------------|
| 10/29/2013 9:20  | 0 | 264.4435656 | 264.4589728 | 264.447048 | 264.409664 | 264.4227664 |
| 10/29/2013 9:30  | 0 | 264.4456992 | 264.4669728 | 264.451048 | 264.411664 | 264.4267664 |
| 10/29/2013 9:40  | 0 | 264.4478328 | 264.4589728 | 264.451048 | 264.409664 | 264.4257664 |
| 10/29/2013 9:50  | 0 | 264.4484424 | 264.4639728 | 264.452048 | 264.410664 | 264.4287664 |
| 10/29/2013 10:00 | 0 | 264.4502712 | 264.4639728 | 264.455048 | 264.412664 | 264.4287664 |
| 10/29/2013 10:10 | 0 | 264.4511856 | 264.4629728 | 264.455048 | 264.413664 | 264.4297664 |
| 10/29/2013 10:20 | 0 | 264.4508808 | 264.4559728 | 264.449048 | 264.411664 | 264.4257664 |
| 10/29/2013 10:30 | 0 | 264.450576  | 264.4579728 | 264.451048 | 264.411664 | 264.4277664 |
| 10/29/2013 10:40 | 0 | 264.450576  | 264.4529728 | 264.447048 | 264.409664 | 264.4257664 |
| 10/29/2013 10:50 | 0 | 264.4499664 | 264.4539728 | 264.448048 | 264.412664 | 264.4287664 |
| 10/29/2013 11:00 | 0 | 264.4493568 | 264.4539728 | 264.447048 | 264.413664 | 264.4287664 |
| 10/29/2013 11:10 | 0 | 264.4484424 | 264.4499728 | 264.447048 | 264.413664 | 264.4277664 |
| 10/29/2013 11:20 | 0 | 264.4472232 | 264.4489728 | 264.443048 | 264.413664 | 264.4267664 |
| 10/29/2013 11:30 | 0 | 264.4463088 | 264.4469728 | 264.442048 | 264.413664 | 264.4257664 |
| 10/29/2013 11:40 | 0 | 264.4450896 | 264.4439728 | 264.440048 | 264.411664 | 264.4257664 |
| 10/29/2013 11:50 | 0 | 264.4438704 | 264.4449728 | 264.441048 | 264.414664 | 264.4267664 |
| 10/29/2013 12:00 | 0 | 264.4426512 | 264.4369728 | 264.436048 | 264.411664 | 264.4237664 |
| 10/29/2013 12:10 | 0 | 264.438384  | 264.4289728 | 264.430048 | 264.414664 | 264.4217664 |
| 10/29/2013 12:20 | 0 | 264.4365552 | 264.4279728 | 264.427048 | 264.413664 | 264.4197664 |
| 10/29/2013 12:30 | 0 | 264.4332024 | 264.4339728 | 264.425048 | 264.414664 | 264.4207664 |
| 10/29/2013 12:40 | 0 | 264.4365552 | 264.4519728 | 264.429048 | 264.414664 | 264.4277664 |
| 10/29/2013 12:50 | 0 | 264.4420416 | 264.4499728 | 264.434048 | 264.412664 | 264.4297664 |
| 10/29/2013 13:00 | 0 | 264.4435656 | 264.4469728 | 264.437048 | 264.413664 | 264.4267664 |
| 10/29/2013 13:10 | 0 | 264.4423464 | 264.4399728 | 264.434048 | 264.410664 | 264.4247664 |
| 10/29/2013 13:20 | 0 | 264.4408224 | 264.4359728 | 264.433048 | 264.414664 | 264.4247664 |
| 10/29/2013 13:30 | 0 | 264.4389936 | 264.4329728 | 264.430048 | 264.412664 | 264.4207664 |
| 10/29/2013 13:40 | 0 | 264.4371648 | 264.4339728 | 264.429048 | 264.415664 | 264.4237664 |
| 10/29/2013 13:50 | 0 | 264.4359456 | 264.4279728 | 264.424048 | 264.410664 | 264.4207664 |
| 10/29/2013 14:00 | 0 | 264.4344216 | 264.4379728 | 264.426048 | 264.414664 | 264.4227664 |
| 10/29/2013 14:10 | 0 | 264.4362504 | 264.4359728 | 264.428048 | 264.413664 | 264.4237664 |
| 10/29/2013 14:20 | 0 | 264.4365552 | 264.4339728 | 264.427048 | 264.413664 | 264.4217664 |
| 10/29/2013 14:30 | 0 | 264.4356408 | 264.4349728 | 264.427048 | 264.413664 | 264.4227664 |
| 10/29/2013 14:40 | 0 | 264.4365552 | 264.4369728 | 264.428048 | 264.412664 | 264.4247664 |
| 10/29/2013 14:50 | 0 | 264.4365552 | 264.4299728 | 264.427048 | 264.413664 | 264.4227664 |
| 10/29/2013 15:00 | 0 | 264.4344216 | 264.4339728 | 264.427048 | 264.412664 | 264.4237664 |
| 10/29/2013 15:10 | 0 | 264.4344216 | 264.4299728 | 264.424048 | 264.412664 | 264.4217664 |
| 10/29/2013 15:20 | 0 | 264.4328976 | 264.4209728 | 264.420048 | 264.412664 | 264.4177664 |
| 10/29/2013 15:30 | 0 | 264.430764  | 264.4319728 | 264.420048 | 264.411664 | 264.4187664 |
| 10/29/2013 15:40 | 0 | 264.4328976 | 264.4279728 | 264.419048 | 264.412664 | 264.4177664 |
| 10/29/2013 15:50 | 0 | 264.4313736 | 264.4209728 | 264.418048 | 264.411664 | 264.4177664 |
| 10/29/2013 16:00 | 0 | 264.4298496 | 264.4169728 | 264.416048 | 264.412664 | 264.4157664 |
| 10/29/2013 16:10 | 0 | 264.427716  | 264.4289728 | 264.415048 | 264.411664 | 264.4157664 |
| 10/29/2013 16:20 | 0 | 264.4304592 | 264.4249728 | 264.419048 | 264.413664 | 264.4187664 |
| 10/29/2013 16:30 | 0 | 264.4271064 | 264.4249728 | 264.415048 | 264.413664 | 264.4157664 |
| 10/29/2013 16:40 | 0 | 264.42924   | 264.4319728 | 264.419048 | 264.415664 | 264.4187664 |
| 10/29/2013 16:50 | 0 | 264.4301544 | 264.4169728 | 264.418048 | 264.413664 | 264.4157664 |
| 10/29/2013 17:00 | 0 | 264.4274112 | 264.4309728 | 264.418048 | 264.414664 | 264.4177664 |



|                  |   |             |             |            |            |             |
|------------------|---|-------------|-------------|------------|------------|-------------|
| 10/29/2013 17:10 | 0 | 264.4298496 | 264.4279728 | 264.420048 | 264.415664 | 264.4177664 |
| 10/29/2013 17:20 | 0 | 264.4280208 | 264.4279728 | 264.415048 | 264.412664 | 264.4167664 |
| 10/29/2013 17:30 | 0 | 264.4258872 | 264.4249728 | 264.414048 | 264.415664 | 264.4147664 |
| 10/29/2013 17:40 | 0 | 264.4283256 | 264.4329728 | 264.418048 | 264.413664 | 264.4177664 |
| 10/29/2013 17:50 | 0 | 264.4274112 | 264.4229728 | 264.414048 | 264.414664 | 264.4127664 |
| 10/29/2013 18:00 | 0 | 264.4283256 | 264.4299728 | 264.418048 | 264.413664 | 264.4177664 |
| 10/29/2013 18:10 | 0 | 264.426192  | 264.4259728 | 264.415048 | 264.411664 | 264.4157664 |
| 10/29/2013 18:20 | 0 | 264.4283256 | 264.4319728 | 264.418048 | 264.413664 | 264.4177664 |
| 10/29/2013 18:30 | 0 | 264.4298496 | 264.4209728 | 264.418048 | 264.414664 | 264.4137664 |
| 10/29/2013 18:40 | 0 | 264.4274112 | 264.4329728 | 264.417048 | 264.413664 | 264.4157664 |
| 10/29/2013 18:50 | 0 | 264.4301544 | 264.4299728 | 264.421048 | 264.413664 | 264.4167664 |
| 10/29/2013 19:00 | 0 | 264.42924   | 264.4299728 | 264.421048 | 264.412664 | 264.4167664 |
| 10/29/2013 19:10 | 0 | 264.4301544 | 264.4279728 | 264.422048 | 264.414664 | 264.4167664 |
| 10/29/2013 19:20 | 0 | 264.4298496 | 264.4319728 | 264.421048 | 264.411664 | 264.4167664 |
| 10/29/2013 19:30 | 0 | 264.4313736 | 264.4339728 | 264.422048 | 264.411664 | 264.4187664 |
| 10/29/2013 19:40 | 0 | 264.4316784 | 264.4349728 | 264.425048 | 264.413664 | 264.4177664 |
| 10/29/2013 19:50 | 0 | 264.4328976 | 264.4369728 | 264.426048 | 264.414664 | 264.4187664 |
| 10/29/2013 20:00 | 0 | 264.4341168 | 264.4399728 | 264.429048 | 264.416664 | 264.4197664 |
| 10/29/2013 20:10 | 0 | 264.4347264 | 264.4399728 | 264.429048 | 264.414664 | 264.4197664 |
| 10/29/2013 20:20 | 0 | 264.4356408 | 264.4399728 | 264.430048 | 264.416664 | 264.4197664 |
| 10/29/2013 20:30 | 0 | 264.4365552 | 264.4429728 | 264.430048 | 264.412664 | 264.4217664 |
| 10/29/2013 20:40 | 0 | 264.4374696 | 264.4429728 | 264.432048 | 264.413664 | 264.4247664 |
| 10/29/2013 20:50 | 0 | 264.4380792 | 264.4409728 | 264.432048 | 264.415664 | 264.4227664 |
| 10/29/2013 21:00 | 0 | 264.438384  | 264.4429728 | 264.434048 | 264.412664 | 264.4237664 |
| 10/29/2013 21:10 | 0 | 264.4396032 | 264.4449728 | 264.435048 | 264.414664 | 264.4237664 |
| 10/29/2013 21:20 | 0 | 264.4408224 | 264.4459728 | 264.437048 | 264.415664 | 264.4267664 |
| 10/29/2013 21:30 | 0 | 264.441432  | 264.4429728 | 264.435048 | 264.414664 | 264.4237664 |
| 10/29/2013 21:40 | 0 | 264.4423464 | 264.4509728 | 264.440048 | 264.415664 | 264.4277664 |
| 10/29/2013 21:50 | 0 | 264.4432608 | 264.4489728 | 264.440048 | 264.415664 | 264.4267664 |
| 10/29/2013 22:00 | 0 | 264.4432608 | 264.4509728 | 264.439048 | 264.414664 | 264.4267664 |
| 10/29/2013 22:10 | 0 | 264.4441752 | 264.4519728 | 264.442048 | 264.416664 | 264.4307664 |
| 10/29/2013 22:20 | 0 | 264.4456992 | 264.4529728 | 264.445048 | 264.414664 | 264.4307664 |
| 10/29/2013 22:30 | 0 | 264.4472232 | 264.4529728 | 264.442048 | 264.414664 | 264.4307664 |
| 10/29/2013 22:40 | 0 | 264.4481376 | 264.4529728 | 264.445048 | 264.416664 | 264.4287664 |
| 10/29/2013 22:50 | 0 | 264.4487472 | 264.4559728 | 264.448048 | 264.415664 | 264.4297664 |
| 10/29/2013 23:00 | 0 | 264.4487472 | 264.4539728 | 264.446048 | 264.417664 | 264.4297664 |
| 10/29/2013 23:10 | 0 | 264.4493568 | 264.4539728 | 264.446048 | 264.413664 | 264.4337664 |
| 10/29/2013 23:20 | 0 | 264.4493568 | 264.4539728 | 264.446048 | 264.417664 | 264.4337664 |
| 10/29/2013 23:30 | 0 | 264.4487472 | 264.4509728 | 264.446048 | 264.417664 | 264.4317664 |
| 10/29/2013 23:40 | 0 | 264.4481376 | 264.4489728 | 264.444048 | 264.418664 | 264.4307664 |
| 10/29/2013 23:50 | 0 | 264.4469184 | 264.4439728 | 264.441048 | 264.416664 | 264.4297664 |
| 10/30/2013 0:00  | 0 | 264.4456992 | 264.4419728 | 264.438048 | 264.416664 | 264.4277664 |
| 10/30/2013 0:10  | 0 | 264.4441752 | 264.4389728 | 264.436048 | 264.415664 | 264.4277664 |
| 10/30/2013 0:20  | 0 | 264.4426512 | 264.4369728 | 264.434048 | 264.415664 | 264.4277664 |
| 10/30/2013 0:30  | 0 | 264.4408224 | 264.4339728 | 264.433048 | 264.418664 | 264.4237664 |
| 10/30/2013 0:40  | 0 | 264.4392984 | 264.4319728 | 264.430048 | 264.416664 | 264.4237664 |
| 10/30/2013 0:50  | 0 | 264.4374696 | 264.4269728 | 264.426048 | 264.416664 | 264.4227664 |

|                 |   |             |             |            |            |             |
|-----------------|---|-------------|-------------|------------|------------|-------------|
| 10/30/2013 1:00 | 0 | 264.435336  | 264.4269728 | 264.424048 | 264.414664 | 264.4217664 |
| 10/30/2013 1:10 | 0 | 264.4335072 | 264.4249728 | 264.422048 | 264.414664 | 264.4197664 |
| 10/30/2013 1:20 | 0 | 264.4316784 | 264.4119728 | 264.418048 | 264.412664 | 264.4187664 |
| 10/30/2013 1:30 | 0 | 264.427716  | 264.4249728 | 264.416048 | 264.414664 | 264.4187664 |
| 10/30/2013 1:40 | 0 | 264.42924   | 264.4189728 | 264.416048 | 264.413664 | 264.4197664 |
| 10/30/2013 1:50 | 0 | 264.424668  | 264.4119728 | 264.409048 | 264.413664 | 264.4147664 |
| 10/30/2013 2:00 | 0 | 264.424668  | 264.4099728 | 264.410048 | 264.415664 | 264.4147664 |
| 10/30/2013 2:10 | 0 | 264.4204008 | 264.4139728 | 264.405048 | 264.413664 | 264.4127664 |
| 10/30/2013 2:20 | 0 | 264.4210104 | 264.3989728 | 264.402048 | 264.415664 | 264.4097664 |
| 10/30/2013 2:30 | 0 | 264.417048  | 264.4099728 | 264.401048 | 264.413664 | 264.4117664 |
| 10/30/2013 2:40 | 0 | 264.415524  | 264.3969728 | 264.397048 | 264.415664 | 264.4077664 |
| 10/30/2013 2:50 | 0 | 264.4133904 | 264.3929728 | 264.396048 | 264.414664 | 264.4057664 |
| 10/30/2013 3:00 | 0 | 264.4106472 | 264.3969728 | 264.393048 | 264.411664 | 264.4027664 |
| 10/30/2013 3:10 | 0 | 264.4097328 | 264.3979728 | 264.393048 | 264.414664 | 264.4057664 |
| 10/30/2013 3:20 | 0 | 264.4088184 | 264.3949728 | 264.389048 | 264.412664 | 264.4017664 |
| 10/30/2013 3:30 | 0 | 264.4082088 | 264.3879728 | 264.389048 | 264.414664 | 264.3987664 |
| 10/30/2013 3:40 | 0 | 264.4060752 | 264.3919728 | 264.389048 | 264.412664 | 264.4007664 |
| 10/30/2013 3:50 | 0 | 264.4045512 | 264.3949728 | 264.388048 | 264.412664 | 264.4017664 |
| 10/30/2013 4:00 | 0 | 264.4039416 | 264.3929728 | 264.387048 | 264.409664 | 264.3987664 |
| 10/30/2013 4:10 | 0 | 264.4042464 | 264.3859728 | 264.388048 | 264.411664 | 264.3987664 |
| 10/30/2013 4:20 | 0 | 264.4024176 | 264.3939728 | 264.387048 | 264.409664 | 264.3977664 |
| 10/30/2013 4:30 | 0 | 264.4011984 | 264.3969728 | 264.387048 | 264.412664 | 264.3977664 |
| 10/30/2013 4:40 | 0 | 264.4021128 | 264.3939728 | 264.386048 | 264.410664 | 264.3967664 |
| 10/30/2013 4:50 | 0 | 264.4024176 | 264.3849728 | 264.384048 | 264.410664 | 264.3947664 |
| 10/30/2013 5:00 | 0 | 264.3999792 | 264.3899728 | 264.386048 | 264.414664 | 264.3977664 |
| 10/30/2013 5:10 | 0 | 264.3996744 | 264.3869728 | 264.382048 | 264.410664 | 264.3927664 |
| 10/30/2013 5:20 | 0 | 264.3990648 | 264.3899728 | 264.383048 | 264.410664 | 264.3927664 |
| 10/30/2013 5:30 | 0 | 264.3978456 | 264.3849728 | 264.379048 | 264.408664 | 264.3897664 |
| 10/30/2013 5:40 | 0 | 264.39876   | 264.3859728 | 264.383048 | 264.408664 | 264.3917664 |
| 10/30/2013 5:50 | 0 | 264.3966264 | 264.3869728 | 264.380048 | 264.408664 | 264.3927664 |
| 10/30/2013 6:00 | 0 | 264.3978456 | 264.3849728 | 264.379048 | 264.408664 | 264.3907664 |
| 10/30/2013 6:10 | 0 | 264.3966264 | 264.3869728 | 264.382048 | 264.410664 | 264.3907664 |
| 10/30/2013 6:20 | 0 | 264.3963216 | 264.3899728 | 264.382048 | 264.408664 | 264.3907664 |
| 10/30/2013 6:30 | 0 | 264.3966264 | 264.3939728 | 264.383048 | 264.411664 | 264.3937664 |
| 10/30/2013 6:40 | 0 | 264.3996744 | 264.3869728 | 264.384048 | 264.406664 | 264.3897664 |
| 10/30/2013 6:50 | 0 | 264.3969312 | 264.3909728 | 264.383048 | 264.409664 | 264.3907664 |
| 10/30/2013 7:00 | 0 | 264.3996744 | 264.3949728 | 264.386048 | 264.410664 | 264.3927664 |
| 10/30/2013 7:10 | 0 | 264.4008936 | 264.3969728 | 264.388048 | 264.407664 | 264.3927664 |
| 10/30/2013 7:20 | 0 | 264.401808  | 264.3999728 | 264.388048 | 264.407664 | 264.3927664 |
| 10/30/2013 7:30 | 0 | 264.403332  | 264.4049728 | 264.391048 | 264.406664 | 264.3947664 |
| 10/30/2013 7:40 | 0 | 264.4057704 | 264.4159728 | 264.395048 | 264.409664 | 264.4007664 |
| 10/30/2013 7:50 | 0 | 264.4106472 | 264.4239728 | 264.402048 | 264.407664 | 264.4007664 |
| 10/30/2013 8:00 | 0 | 264.415524  | 264.4219728 | 264.406048 | 264.407664 | 264.4027664 |
| 10/30/2013 8:10 | 0 | 264.4191816 | 264.4309728 | 264.414048 | 264.411664 | 264.4077664 |
| 10/30/2013 8:20 | 0 | 264.4225344 | 264.4329728 | 264.418048 | 264.408664 | 264.4067664 |
| 10/30/2013 8:30 | 0 | 264.4255824 | 264.4429728 | 264.422048 | 264.408664 | 264.4117664 |
| 10/30/2013 8:40 | 0 | 264.4298496 | 264.4399728 | 264.425048 | 264.408664 | 264.4137664 |

|                  |        |             |             |            |            |             |
|------------------|--------|-------------|-------------|------------|------------|-------------|
| 10/30/2013 8:50  | 0      | 264.4328976 | 264.4489728 | 264.430048 | 264.409664 | 264.4167664 |
| 10/30/2013 9:00  | 0      | 264.4350312 | 264.4519728 | 264.435048 | 264.408664 | 264.4187664 |
| 10/30/2013 9:10  | 0      | 264.4386888 | 264.4449728 | 264.436048 | 264.406664 | 264.4167664 |
| 10/30/2013 9:20  | 0      | 264.4396032 | 264.4569728 | 264.440048 | 264.405664 | 264.4217664 |
| 10/30/2013 9:30  | 0      | 264.442956  | 264.4529728 | 264.442048 | 264.405664 | 264.4217664 |
| 10/30/2013 9:40  | 0      | 264.4447848 | 264.4659728 | 264.447048 | 264.408664 | 264.4257664 |
| 10/30/2013 9:50  | 0      | 264.4469184 | 264.4549728 | 264.448048 | 264.407664 | 264.4227664 |
| 10/30/2013 10:00 | 0.0254 | 264.4481376 | 264.4669728 | 264.449048 | 264.407664 | 264.4257664 |
| 10/30/2013 10:10 | 0.127  | 264.4502712 | 264.4609728 | 264.453048 | 264.408664 | 264.4277664 |
| 10/30/2013 10:20 | 0.2794 | 264.4514904 | 264.4669728 | 264.453048 | 264.406664 | 264.4307664 |
| 10/30/2013 10:30 | 0.3048 | 264.4533192 | 264.4629728 | 264.454048 | 264.407664 | 264.4287664 |
| 10/30/2013 10:40 | 0.381  | 264.4533192 | 264.4569728 | 264.453048 | 264.406664 | 264.4277664 |
| 10/30/2013 10:50 | 0.6096 | 264.4527096 | 264.4569728 | 264.452048 | 264.409664 | 264.4317664 |
| 10/30/2013 11:00 | 0.6604 | 264.453624  | 264.4629728 | 264.451048 | 264.409664 | 264.4297664 |
| 10/30/2013 11:10 | 0.8382 | 264.4545384 | 264.4619728 | 264.455048 | 264.407664 | 264.4327664 |
| 10/30/2013 11:20 | 1.0922 | 264.4557576 | 264.4649728 | 264.456048 | 264.410664 | 264.4347664 |
| 10/30/2013 11:30 | 1.1684 | 264.4569768 | 264.4689728 | 264.458048 | 264.412664 | 264.4377664 |
| 10/30/2013 11:40 | 1.2192 | 264.4578912 | 264.4669728 | 264.457048 | 264.412664 | 264.4337664 |
| 10/30/2013 11:50 | 1.3462 | 264.4618536 | 264.5129728 | 264.466048 | 264.410664 | 264.4497664 |
| 10/30/2013 12:00 | 1.4224 | 264.4792272 | 264.5689728 | 264.493048 | 264.409664 | 264.4707664 |
| 10/30/2013 12:10 | 1.4732 | 264.5045256 | 264.6249728 | 264.536048 | 264.413664 | 264.4977664 |
| 10/30/2013 12:20 | 1.5748 | 264.5377488 | 264.6779728 | 264.584048 | 264.414664 | 264.5237664 |
| 10/30/2013 12:30 | 1.651  | 264.5752392 | 264.7179728 | 264.631048 | 264.416664 | 264.5467664 |
| 10/30/2013 12:40 | 1.6764 | 264.6093768 | 264.7449728 | 264.670048 | 264.419664 | 264.5627664 |
| 10/30/2013 12:50 | 1.7018 | 264.6386376 | 264.7629728 | 264.703048 | 264.424664 | 264.5787664 |
| 10/30/2013 13:00 | 1.7018 | 264.660888  | 264.7769728 | 264.727048 | 264.425664 | 264.5867664 |
| 10/30/2013 13:10 | 1.7018 | 264.6788712 | 264.7929728 | 264.748048 | 264.431664 | 264.5947664 |
| 10/30/2013 13:20 | 1.7018 | 264.6962448 | 264.8099728 | 264.766048 | 264.433664 | 264.6057664 |
| 10/30/2013 13:30 | 1.7018 | 264.7169712 | 264.8389728 | 264.785048 | 264.436664 | 264.6197664 |
| 10/30/2013 13:40 | 1.7018 | 264.738612  | 264.8669728 | 264.808048 | 264.466664 | 264.6367664 |
| 10/30/2013 13:50 | 1.7018 | 264.7602528 | 264.8889728 | 264.833048 | 264.878664 | 264.6497664 |
| 10/30/2013 14:00 | 1.7018 | 264.7794552 | 264.9079728 | 264.856048 | 264.898664 | 264.6637664 |
| 10/30/2013 14:10 | 1.7018 | 264.7953048 | 264.9249728 | 264.875048 | 264.917664 | 264.6727664 |
| 10/30/2013 14:20 | 1.7018 | 264.808716  | 264.9349728 | 264.895048 | 264.925664 | 264.6817664 |
| 10/30/2013 14:30 | 1.7018 | 264.8184696 | 264.9409728 | 264.908048 | 264.932664 | 264.6897664 |
| 10/30/2013 14:40 | 1.7018 | 264.8242608 | 264.9409728 | 264.915048 | 264.931664 | 264.6927664 |
| 10/30/2013 14:50 | 1.7018 | 264.8288328 | 264.9389728 | 264.920048 | 264.930664 | 264.6957664 |
| 10/30/2013 15:00 | 1.7018 | 264.830052  | 264.9359728 | 264.924048 | 264.929664 | 264.7007664 |
| 10/30/2013 15:10 | 1.7018 | 264.8294424 | 264.9269728 | 264.919048 | 264.918664 | 264.7007664 |
| 10/30/2013 15:20 | 1.7018 | 264.8263944 | 264.9159728 | 264.916048 | 264.910664 | 264.6977664 |
| 10/30/2013 15:30 | 1.7018 | 264.822432  | 264.9019728 | 264.908048 | 264.897664 | 264.6957664 |
| 10/30/2013 15:40 | 1.7018 | 264.8160312 | 264.8939728 | 264.900048 | 264.887664 | 264.6947664 |
| 10/30/2013 15:50 | 1.7018 | 264.8090208 | 264.8789728 | 264.889048 | 264.872664 | 264.6887664 |
| 10/30/2013 16:00 | 1.7018 | 264.8014008 | 264.8659728 | 264.877048 | 264.861664 | 264.6877664 |
| 10/30/2013 16:10 | 1.7018 | 264.7928664 | 264.8469728 | 264.861048 | 264.848664 | 264.6797664 |
| 10/30/2013 16:20 | 1.7018 | 264.7846368 | 264.8369728 | 264.850048 | 264.851664 | 264.6797664 |
| 10/30/2013 16:30 | 1.7018 | 264.7757976 | 264.8219728 | 264.837048 | 264.847664 | 264.6707664 |

|                  |        |             |             |            |            |             |
|------------------|--------|-------------|-------------|------------|------------|-------------|
| 10/30/2013 16:40 | 1.7018 | 264.769092  | 264.8089728 | 264.823048 | 264.849664 | 264.6677664 |
| 10/30/2013 16:50 | 1.7018 | 264.7596432 | 264.7969728 | 264.810048 | 264.847664 | 264.6637664 |
| 10/30/2013 17:00 | 1.7018 | 264.752328  | 264.7889728 | 264.798048 | 264.848664 | 264.6597664 |
| 10/30/2013 17:10 | 1.7018 | 264.7465368 | 264.7769728 | 264.788048 | 264.845664 | 264.6557664 |
| 10/30/2013 17:20 | 1.7018 | 264.7404408 | 264.7669728 | 264.778048 | 264.845664 | 264.6517664 |
| 10/30/2013 17:30 | 1.7018 | 264.7346496 | 264.7609728 | 264.767048 | 264.842664 | 264.6487664 |
| 10/30/2013 17:40 | 1.7018 | 264.7288584 | 264.7569728 | 264.762048 | 264.841664 | 264.6487664 |
| 10/30/2013 17:50 | 1.7018 | 264.724896  | 264.7489728 | 264.749048 | 264.836664 | 264.6457664 |
| 10/30/2013 18:00 | 1.7018 | 264.721848  | 264.7409728 | 264.744048 | 264.835664 | 264.6407664 |
| 10/30/2013 18:10 | 1.7018 | 264.7178856 | 264.7339728 | 264.740048 | 264.836664 | 264.6417664 |
| 10/30/2013 18:20 | 1.7018 | 264.7145328 | 264.7309728 | 264.735048 | 264.832664 | 264.6377664 |
| 10/30/2013 18:30 | 1.7018 | 264.7099608 | 264.7239728 | 264.728048 | 264.830664 | 264.6367664 |
| 10/30/2013 18:40 | 1.7018 | 264.7056936 | 264.7209728 | 264.723048 | 264.827664 | 264.6347664 |
| 10/30/2013 18:50 | 1.7018 | 264.702036  | 264.7169728 | 264.719048 | 264.830664 | 264.6327664 |
| 10/30/2013 19:00 | 1.7018 | 264.6986832 | 264.7079728 | 264.713048 | 264.827664 | 264.6297664 |
| 10/30/2013 19:10 | 1.7018 | 264.6956352 | 264.7019728 | 264.708048 | 264.824664 | 264.6307664 |
| 10/30/2013 19:20 | 1.7018 | 264.6916728 | 264.7009728 | 264.704048 | 264.821664 | 264.6297664 |
| 10/30/2013 19:30 | 1.7018 | 264.6874056 | 264.6959728 | 264.699048 | 264.821664 | 264.6277664 |
| 10/30/2013 19:40 | 1.7018 | 264.6843576 | 264.6909728 | 264.690048 | 264.818664 | 264.6237664 |
| 10/30/2013 19:50 | 1.7018 | 264.6810048 | 264.6859728 | 264.688048 | 264.815664 | 264.6237664 |
| 10/30/2013 20:00 | 1.7018 | 264.6782616 | 264.6819728 | 264.685048 | 264.817664 | 264.6217664 |
| 10/30/2013 20:10 | 1.7018 | 264.6739944 | 264.6779728 | 264.681048 | 264.812664 | 264.6207664 |
| 10/30/2013 20:20 | 1.7018 | 264.6688128 | 264.6729728 | 264.673048 | 264.810664 | 264.6157664 |
| 10/30/2013 20:30 | 1.7018 | 264.6660696 | 264.6659728 | 264.670048 | 264.806664 | 264.6127664 |
| 10/30/2013 20:40 | 1.7018 | 264.6621072 | 264.6599728 | 264.663048 | 264.808664 | 264.6097664 |
| 10/30/2013 20:50 | 1.7018 | 264.6590592 | 264.6529728 | 264.657048 | 264.804664 | 264.6077664 |
| 10/30/2013 21:00 | 1.7018 | 264.6541824 | 264.6479728 | 264.653048 | 264.800664 | 264.6057664 |
| 10/30/2013 21:10 | 1.7018 | 264.6505248 | 264.6439728 | 264.647048 | 264.796664 | 264.6017664 |
| 10/30/2013 21:20 | 1.7018 | 264.6462576 | 264.6439728 | 264.644048 | 264.797664 | 264.6017664 |
| 10/30/2013 21:30 | 1.7018 | 264.6429048 | 264.6359728 | 264.639048 | 264.795664 | 264.5957664 |
| 10/30/2013 21:40 | 1.7018 | 264.6404664 | 264.6339728 | 264.636048 | 264.793664 | 264.5957664 |
| 10/30/2013 21:50 | 1.7018 | 264.6358944 | 264.6289728 | 264.630048 | 264.789664 | 264.5947664 |
| 10/30/2013 22:00 | 1.7018 | 264.6340656 | 264.6209728 | 264.624048 | 264.789664 | 264.5907664 |
| 10/30/2013 22:10 | 1.7018 | 264.628884  | 264.6219728 | 264.622048 | 264.787664 | 264.5907664 |
| 10/30/2013 22:20 | 1.7018 | 264.6279696 | 264.6159728 | 264.616048 | 264.784664 | 264.5857664 |
| 10/30/2013 22:30 | 1.7018 | 264.6246168 | 264.6169728 | 264.615048 | 264.780664 | 264.5857664 |
| 10/30/2013 22:40 | 1.7018 | 264.6224832 | 264.6089728 | 264.610048 | 264.779664 | 264.5837664 |
| 10/30/2013 22:50 | 1.7018 | 264.6185208 | 264.6019728 | 264.607048 | 264.777664 | 264.5787664 |
| 10/30/2013 23:00 | 1.7018 | 264.613644  | 264.5999728 | 264.602048 | 264.776664 | 264.5797664 |
| 10/30/2013 23:10 | 1.7272 | 264.6127296 | 264.5979728 | 264.600048 | 264.774664 | 264.5777664 |
| 10/30/2013 23:20 | 1.7272 | 264.6102912 | 264.5939728 | 264.595048 | 264.770664 | 264.5747664 |
| 10/30/2013 23:30 | 1.7272 | 264.6069384 | 264.5919728 | 264.592048 | 264.770664 | 264.5737664 |
| 10/30/2013 23:40 | 1.7272 | 264.6035856 | 264.5859728 | 264.590048 | 264.767664 | 264.5697664 |
| 10/30/2013 23:50 | 1.7272 | 264.6008424 | 264.5849728 | 264.585048 | 264.763664 | 264.5707664 |
| 10/31/2013 0:00  | 1.7272 | 264.601452  | 264.5869728 | 264.584048 | 264.761664 | 264.5657664 |
| 10/31/2013 0:10  | 0      | 264.5993184 | 264.5829728 | 264.582048 | 264.761664 | 264.5657664 |
| 10/31/2013 0:20  | 0      | 264.5959656 | 264.5769728 | 264.579048 | 264.759664 | 264.5637664 |

|                 |        |             |             |            |            |             |
|-----------------|--------|-------------|-------------|------------|------------|-------------|
| 10/31/2013 0:30 | 0      | 264.5913936 | 264.5729728 | 264.575048 | 264.755664 | 264.5597664 |
| 10/31/2013 0:40 | 0      | 264.5895648 | 264.5639728 | 264.571048 | 264.755664 | 264.5577664 |
| 10/31/2013 0:50 | 0      | 264.584688  | 264.5659728 | 264.567048 | 264.751664 | 264.5557664 |
| 10/31/2013 1:00 | 0      | 264.5825544 | 264.5529728 | 264.560048 | 264.749664 | 264.5507664 |
| 10/31/2013 1:10 | 0      | 264.5752392 | 264.5509728 | 264.555048 | 264.744664 | 264.5477664 |
| 10/31/2013 1:20 | 0      | 264.5721912 | 264.5399728 | 264.546048 | 264.741664 | 264.5407664 |
| 10/31/2013 1:30 | 0      | 264.5688384 | 264.5409728 | 264.545048 | 264.740664 | 264.5437664 |
| 10/31/2013 1:40 | 0      | 264.5642664 | 264.5399728 | 264.541048 | 264.740664 | 264.5447664 |
| 10/31/2013 1:50 | 0      | 264.5660952 | 264.5319728 | 264.538048 | 264.738664 | 264.5377664 |
| 10/31/2013 2:00 | 0.0254 | 264.5612184 | 264.5399728 | 264.537048 | 264.734664 | 264.5397664 |
| 10/31/2013 2:10 | 0.0254 | 264.5599992 | 264.5329728 | 264.534048 | 264.732664 | 264.5357664 |
| 10/31/2013 2:20 | 0.0254 | 264.5609136 | 264.5289728 | 264.532048 | 264.729664 | 264.5337664 |
| 10/31/2013 2:30 | 0.0254 | 264.5584752 | 264.5309728 | 264.531048 | 264.728664 | 264.5367664 |
| 10/31/2013 2:40 | 0.0254 | 264.5535984 | 264.5279728 | 264.528048 | 264.723664 | 264.5297664 |
| 10/31/2013 2:50 | 0.0254 | 264.554208  | 264.5219728 | 264.525048 | 264.723664 | 264.5297664 |
| 10/31/2013 3:00 | 0.0254 | 264.5505504 | 264.5229728 | 264.524048 | 264.721664 | 264.5297664 |
| 10/31/2013 3:10 | 0.0254 | 264.5471976 | 264.5169728 | 264.518048 | 264.719664 | 264.5247664 |
| 10/31/2013 3:20 | 0.0254 | 264.5462832 | 264.5149728 | 264.517048 | 264.718664 | 264.5247664 |
| 10/31/2013 3:30 | 0.0254 | 264.5432352 | 264.5189728 | 264.516048 | 264.717664 | 264.5257664 |
| 10/31/2013 3:40 | 0.0254 | 264.5407968 | 264.5079728 | 264.513048 | 264.713664 | 264.5227664 |
| 10/31/2013 3:50 | 0.0254 | 264.5371392 | 264.5069728 | 264.508048 | 264.710664 | 264.5187664 |
| 10/31/2013 4:00 | 0.0254 | 264.53592   | 264.5079728 | 264.505048 | 264.708664 | 264.5177664 |
| 10/31/2013 4:10 | 0.0254 | 264.5347008 | 264.5039728 | 264.506048 | 264.709664 | 264.5167664 |
| 10/31/2013 4:20 | 0.0254 | 264.5322624 | 264.5019728 | 264.502048 | 264.704664 | 264.5167664 |
| 10/31/2013 4:30 | 0.0254 | 264.5304336 | 264.4989728 | 264.501048 | 264.698664 | 264.5147664 |
| 10/31/2013 4:40 | 0.0254 | 264.5292144 | 264.4969728 | 264.497048 | 264.700664 | 264.5117664 |
| 10/31/2013 4:50 | 0.0254 | 264.5270808 | 264.4949728 | 264.497048 | 264.696664 | 264.5117664 |
| 10/31/2013 5:00 | 0.0254 | 264.5255568 | 264.4929728 | 264.492048 | 264.690664 | 264.5067664 |
| 10/31/2013 5:10 | 0.0254 | 264.5243376 | 264.4899728 | 264.492048 | 264.687664 | 264.5077664 |
| 10/31/2013 5:20 | 0.0254 | 264.5231184 | 264.4909728 | 264.491048 | 264.686664 | 264.5067664 |
| 10/31/2013 5:30 | 0.0254 | 264.5215944 | 264.4899728 | 264.492048 | 264.685664 | 264.5067664 |
| 10/31/2013 5:40 | 0.0254 | 264.5200704 | 264.4909728 | 264.489048 | 264.684664 | 264.5067664 |
| 10/31/2013 5:50 | 0.0254 | 264.519156  | 264.4869728 | 264.487048 | 264.680664 | 264.5027664 |
| 10/31/2013 6:00 | 0.0254 | 264.5173272 | 264.4859728 | 264.488048 | 264.682664 | 264.5027664 |
| 10/31/2013 6:10 | 0.0254 | 264.516108  | 264.4859728 | 264.485048 | 264.679664 | 264.5007664 |
| 10/31/2013 6:20 | 0.0254 | 264.5148888 | 264.4839728 | 264.484048 | 264.674664 | 264.4997664 |
| 10/31/2013 6:30 | 0.0254 | 264.5142792 | 264.4839728 | 264.481048 | 264.672664 | 264.4997664 |
| 10/31/2013 6:40 | 0.0254 | 264.5142792 | 264.4839728 | 264.482048 | 264.672664 | 264.4977664 |
| 10/31/2013 6:50 | 0.0254 | 264.5127552 | 264.4889728 | 264.481048 | 264.670664 | 264.4997664 |
| 10/31/2013 7:00 | 0.0254 | 264.5139744 | 264.4909728 | 264.485048 | 264.666664 | 264.4997664 |
| 10/31/2013 7:10 | 0.0254 | 264.51306   | 264.4869728 | 264.484048 | 264.665664 | 264.4977664 |
| 10/31/2013 7:20 | 0.0254 | 264.5127552 | 264.4889728 | 264.484048 | 264.665664 | 264.4997664 |
| 10/31/2013 7:30 | 0.0254 | 264.5127552 | 264.4929728 | 264.486048 | 264.662664 | 264.4997664 |
| 10/31/2013 7:40 | 0.0254 | 264.5124504 | 264.4959728 | 264.488048 | 264.662664 | 264.4997664 |
| 10/31/2013 7:50 | 0.0254 | 264.514584  | 264.4939728 | 264.488048 | 264.656664 | 264.4997664 |
| 10/31/2013 8:00 | 0.0254 | 264.516108  | 264.5019728 | 264.492048 | 264.657664 | 264.5027664 |
| 10/31/2013 8:10 | 0.0254 | 264.5179368 | 264.5029728 | 264.493048 | 264.653664 | 264.5027664 |

|                  |        |             |             |            |            |             |
|------------------|--------|-------------|-------------|------------|------------|-------------|
| 10/31/2013 8:20  | 0.0254 | 264.5203752 | 264.5079728 | 264.496048 | 264.655664 | 264.5017664 |
| 10/31/2013 8:30  | 0.0254 | 264.5225088 | 264.5089728 | 264.498048 | 264.652664 | 264.5027664 |
| 10/31/2013 8:40  | 0.0254 | 264.5243376 | 264.5119728 | 264.503048 | 264.650664 | 264.5067664 |
| 10/31/2013 8:50  | 0.0254 | 264.5255568 | 264.5129728 | 264.503048 | 264.648664 | 264.5047664 |
| 10/31/2013 9:00  | 0.0254 | 264.5301288 | 264.5229728 | 264.511048 | 264.650664 | 264.5107664 |
| 10/31/2013 9:10  | 0.0254 | 264.5331768 | 264.5249728 | 264.514048 | 264.646664 | 264.5107664 |
| 10/31/2013 9:20  | 0.0254 | 264.5337864 | 264.5299728 | 264.518048 | 264.646664 | 264.5127664 |
| 10/31/2013 9:30  | 0.0254 | 264.5334816 | 264.5219728 | 264.516048 | 264.643664 | 264.5097664 |
| 10/31/2013 9:40  | 0.0254 | 264.5350056 | 264.5229728 | 264.517048 | 264.643664 | 264.5107664 |
| 10/31/2013 9:50  | 0.0254 | 264.5322624 | 264.5229728 | 264.518048 | 264.641664 | 264.5107664 |
| 10/31/2013 10:00 | 0.0254 | 264.534396  | 264.5179728 | 264.515048 | 264.639664 | 264.5087664 |
| 10/31/2013 10:10 | 0.0254 | 264.5319576 | 264.5209728 | 264.517048 | 264.640664 | 264.5117664 |
| 10/31/2013 10:20 | 0.0254 | 264.5295192 | 264.5199728 | 264.515048 | 264.637664 | 264.5087664 |
| 10/31/2013 10:30 | 0.0254 | 264.5310432 | 264.5159728 | 264.515048 | 264.638664 | 264.5097664 |
| 10/31/2013 10:40 | 0.0254 | 264.5289096 | 264.5199728 | 264.513048 | 264.639664 | 264.5107664 |
| 10/31/2013 10:50 | 0.0254 | 264.5289096 | 264.5139728 | 264.513048 | 264.637664 | 264.5097664 |
| 10/31/2013 11:00 | 0.0254 | 264.526776  | 264.5109728 | 264.509048 | 264.634664 | 264.5067664 |
| 10/31/2013 11:10 | 0.0254 | 264.526776  | 264.5159728 | 264.511048 | 264.636664 | 264.5097664 |
| 10/31/2013 11:20 | 0.0254 | 264.525252  | 264.5129728 | 264.509048 | 264.635664 | 264.5067664 |
| 10/31/2013 11:30 | 0.0254 | 264.5270808 | 264.5129728 | 264.510048 | 264.634664 | 264.5077664 |
| 10/31/2013 11:40 | 0.0254 | 264.5231184 | 264.5129728 | 264.507048 | 264.630664 | 264.5067664 |
| 10/31/2013 11:50 | 0.0254 | 264.5243376 | 264.5019728 | 264.505048 | 264.628664 | 264.5017664 |
| 10/31/2013 12:00 | 0.0254 | 264.5215944 | 264.5099728 | 264.502048 | 264.629664 | 264.5047664 |
| 10/31/2013 12:10 | 0.0254 | 264.52068   | 264.5029728 | 264.502048 | 264.628664 | 264.5027664 |
| 10/31/2013 12:20 | 0.0254 | 264.5212896 | 264.5019728 | 264.502048 | 264.626664 | 264.5017664 |
| 10/31/2013 12:30 | 0.0254 | 264.5173272 | 264.5019728 | 264.500048 | 264.626664 | 264.5017664 |
| 10/31/2013 12:40 | 0.0254 | 264.5170224 | 264.4959728 | 264.497048 | 264.622664 | 264.4967664 |
| 10/31/2013 12:50 | 0.0254 | 264.5173272 | 264.5059728 | 264.496048 | 264.621664 | 264.5027664 |
| 10/31/2013 13:00 | 0.0254 | 264.516108  | 264.5029728 | 264.496048 | 264.621664 | 264.5007664 |
| 10/31/2013 13:10 | 0.0254 | 264.5173272 | 264.4979728 | 264.498048 | 264.620664 | 264.5007664 |
| 10/31/2013 13:20 | 0.0254 | 264.514584  | 264.5019728 | 264.495048 | 264.619664 | 264.5007664 |
| 10/31/2013 13:30 | 0.0254 | 264.5151936 | 264.4949728 | 264.493048 | 264.618664 | 264.4987664 |
| 10/31/2013 13:40 | 0.0254 | 264.514584  | 264.4989728 | 264.492048 | 264.616664 | 264.4997664 |
| 10/31/2013 13:50 | 0.0254 | 264.5127552 | 264.4979728 | 264.491048 | 264.615664 | 264.4987664 |
| 10/31/2013 14:00 | 0.0254 | 264.5148888 | 264.4929728 | 264.494048 | 264.617664 | 264.4977664 |
| 10/31/2013 14:10 | 0.0254 | 264.5118408 | 264.4989728 | 264.491048 | 264.615664 | 264.4977664 |
| 10/31/2013 14:20 | 0.0254 | 264.511536  | 264.4969728 | 264.490048 | 264.614664 | 264.4967664 |
| 10/31/2013 14:30 | 0.0254 | 264.5127552 | 264.4939728 | 264.490048 | 264.612664 | 264.4957664 |
| 10/31/2013 14:40 | 0.0254 | 264.5097072 | 264.4969728 | 264.489048 | 264.611664 | 264.4967664 |
| 10/31/2013 14:50 | 0.0254 | 264.5124504 | 264.4909728 | 264.489048 | 264.611664 | 264.4937664 |
| 10/31/2013 15:00 | 0.0254 | 264.5090976 | 264.4969728 | 264.489048 | 264.611664 | 264.4957664 |
| 10/31/2013 15:10 | 0.0254 | 264.5094024 | 264.4919728 | 264.487048 | 264.612664 | 264.4937664 |
| 10/31/2013 15:20 | 0.0254 | 264.5094024 | 264.4939728 | 264.487048 | 264.611664 | 264.4967664 |
| 10/31/2013 15:30 | 0.0254 | 264.5066592 | 264.4919728 | 264.485048 | 264.607664 | 264.4937664 |
| 10/31/2013 15:40 | 0.0254 | 264.5081832 | 264.4849728 | 264.485048 | 264.607664 | 264.4937664 |
| 10/31/2013 15:50 | 0.0254 | 264.5042208 | 264.4889728 | 264.482048 | 264.605664 | 264.4897664 |
| 10/31/2013 16:00 | 0.0254 | 264.5060496 | 264.4799728 | 264.482048 | 264.603664 | 264.4897664 |

|                  |        |             |             |            |            |             |
|------------------|--------|-------------|-------------|------------|------------|-------------|
| 10/31/2013 16:10 | 0.0254 | 264.5020872 | 264.4849728 | 264.478048 | 264.603664 | 264.4897664 |
| 10/31/2013 16:20 | 0.0254 | 264.5045256 | 264.4779728 | 264.482048 | 264.602664 | 264.4897664 |
| 10/31/2013 16:30 | 0.0254 | 264.4999536 | 264.4829728 | 264.477048 | 264.603664 | 264.4877664 |
| 10/31/2013 16:40 | 0.0254 | 264.5026968 | 264.4819728 | 264.478048 | 264.603664 | 264.4877664 |
| 10/31/2013 16:50 | 0.0254 | 264.4996488 | 264.4859728 | 264.475048 | 264.599664 | 264.4867664 |
| 10/31/2013 17:00 | 0.0254 | 264.5020872 | 264.4759728 | 264.476048 | 264.599664 | 264.4857664 |
| 10/31/2013 17:10 | 0.0254 | 264.49782   | 264.4819728 | 264.475048 | 264.597664 | 264.4867664 |
| 10/31/2013 17:20 | 0.0254 | 264.5005632 | 264.4759728 | 264.476048 | 264.596664 | 264.4857664 |
| 10/31/2013 17:30 | 0.0254 | 264.4972104 | 264.4819728 | 264.474048 | 264.595664 | 264.4887664 |
| 10/31/2013 17:40 | 0.0254 | 264.5002584 | 264.4779728 | 264.475048 | 264.594664 | 264.4857664 |
| 10/31/2013 17:50 | 0.0254 | 264.496296  | 264.4829728 | 264.472048 | 264.592664 | 264.4847664 |
| 10/31/2013 18:00 | 0.0254 | 264.4996488 | 264.4849728 | 264.475048 | 264.591664 | 264.4857664 |
| 10/31/2013 18:10 | 0.0254 | 264.4959912 | 264.4759728 | 264.474048 | 264.591664 | 264.4827664 |
| 10/31/2013 18:20 | 0.0254 | 264.4984296 | 264.4859728 | 264.475048 | 264.588664 | 264.4877664 |
| 10/31/2013 18:30 | 0.0254 | 264.4981248 | 264.4759728 | 264.476048 | 264.592664 | 264.4837664 |
| 10/31/2013 18:40 | 0.0254 | 264.4969056 | 264.4859728 | 264.476048 | 264.590664 | 264.4877664 |
| 10/31/2013 18:50 | 0.0254 | 264.4999536 | 264.4799728 | 264.476048 | 264.589664 | 264.4847664 |
| 10/31/2013 19:00 | 0.0254 | 264.4956864 | 264.4829728 | 264.475048 | 264.589664 | 264.4827664 |
| 10/31/2013 19:10 | 0.0254 | 264.4990392 | 264.4859728 | 264.476048 | 264.587664 | 264.4827664 |
| 10/31/2013 19:20 | 0.0254 | 264.4984296 | 264.4729728 | 264.475048 | 264.586664 | 264.4797664 |
| 10/31/2013 19:30 | 0.0254 | 264.496296  | 264.4889728 | 264.478048 | 264.587664 | 264.4857664 |
| 10/31/2013 19:40 | 0.0254 | 264.4996488 | 264.4859728 | 264.479048 | 264.584664 | 264.4847664 |
| 10/31/2013 19:50 | 0.0254 | 264.4969056 | 264.4859728 | 264.479048 | 264.584664 | 264.4847664 |
| 10/31/2013 20:00 | 0.0254 | 264.4996488 | 264.4899728 | 264.480048 | 264.584664 | 264.4877664 |
| 10/31/2013 20:10 | 0.0254 | 264.5002584 | 264.4899728 | 264.482048 | 264.586664 | 264.4857664 |
| 10/31/2013 20:20 | 0.0254 | 264.5002584 | 264.4909728 | 264.483048 | 264.582664 | 264.4857664 |
| 10/31/2013 20:30 | 0.0254 | 264.5014776 | 264.4909728 | 264.482048 | 264.582664 | 264.4857664 |
| 10/31/2013 20:40 | 0.0254 | 264.502392  | 264.4929728 | 264.484048 | 264.581664 | 264.4867664 |
| 10/31/2013 20:50 | 0.0254 | 264.5033064 | 264.4959728 | 264.487048 | 264.582664 | 264.4897664 |
| 10/31/2013 21:00 | 0.0254 | 264.5036112 | 264.4959728 | 264.487048 | 264.579664 | 264.4897664 |
| 10/31/2013 21:10 | 0.0254 | 264.5036112 | 264.4959728 | 264.488048 | 264.577664 | 264.4887664 |
| 10/31/2013 21:20 | 0.0254 | 264.5042208 | 264.4979728 | 264.490048 | 264.578664 | 264.4897664 |
| 10/31/2013 21:30 | 0.0254 | 264.5048304 | 264.4999728 | 264.488048 | 264.579664 | 264.4897664 |
| 10/31/2013 21:40 | 0.0254 | 264.50544   | 264.4969728 | 264.490048 | 264.577664 | 264.4907664 |
| 10/31/2013 21:50 | 0.0254 | 264.5066592 | 264.4999728 | 264.490048 | 264.576664 | 264.4887664 |
| 10/31/2013 22:00 | 0.0254 | 264.5072688 | 264.4989728 | 264.490048 | 264.573664 | 264.4877664 |
| 10/31/2013 22:10 | 0.0254 | 264.5081832 | 264.5019728 | 264.493048 | 264.574664 | 264.4907664 |
| 10/31/2013 22:20 | 0.0254 | 264.508488  | 264.5019728 | 264.495048 | 264.574664 | 264.4907664 |
| 10/31/2013 22:30 | 0.0254 | 264.508488  | 264.5009728 | 264.492048 | 264.574664 | 264.4897664 |
| 10/31/2013 22:40 | 0.0254 | 264.5087928 | 264.4989728 | 264.493048 | 264.574664 | 264.4897664 |
| 10/31/2013 22:50 | 0.0254 | 264.5090976 | 264.4979728 | 264.494048 | 264.572664 | 264.4887664 |
| 10/31/2013 23:00 | 0.0254 | 264.5087928 | 264.5009728 | 264.492048 | 264.574664 | 264.4917664 |
| 10/31/2013 23:10 | 0.0254 | 264.5090976 | 264.4999728 | 264.492048 | 264.572664 | 264.4907664 |
| 10/31/2013 23:20 | 0.0254 | 264.5097072 | 264.5009728 | 264.494048 | 264.571664 | 264.4887664 |
| 10/31/2013 23:30 | 0.0254 | 264.5090976 | 264.5009728 | 264.496048 | 264.572664 | 264.4917664 |
| 10/31/2013 23:40 | 0.0254 | 264.508488  | 264.5009728 | 264.495048 | 264.571664 | 264.4887664 |
| 10/31/2013 23:50 | 0.0254 | 264.5075736 | 264.4979728 | 264.493048 | 264.569664 | 264.4907664 |

|                |        |             |             |            |            |             |
|----------------|--------|-------------|-------------|------------|------------|-------------|
| 11/1/2013 0:00 | 0.0254 | 264.5066592 | 264.4959728 | 264.493048 | 264.571664 | 264.4867664 |
| 11/1/2013 0:10 | 0      | 264.50544   | 264.4949728 | 264.494048 | 264.573664 | 264.4887664 |
| 11/1/2013 0:20 | 0      | 264.5045256 | 264.4909728 | 264.491048 | 264.571664 | 264.4887664 |
| 11/1/2013 0:30 | 0      | 264.5036112 | 264.4899728 | 264.488048 | 264.566664 | 264.4857664 |
| 11/1/2013 0:40 | 0      | 264.5026968 | 264.4899728 | 264.487048 | 264.568664 | 264.4857664 |
| 11/1/2013 0:50 | 0      | 264.5017824 | 264.4869728 | 264.485048 | 264.568664 | 264.4867664 |
| 11/1/2013 1:00 | 0      | 264.5005632 | 264.4849728 | 264.484048 | 264.564664 | 264.4837664 |
| 11/1/2013 1:10 | 0      | 264.4990392 | 264.4829728 | 264.484048 | 264.566664 | 264.4837664 |
| 11/1/2013 1:20 | 0      | 264.4975152 | 264.4799728 | 264.480048 | 264.566664 | 264.4817664 |
| 11/1/2013 1:30 | 0      | 264.4956864 | 264.4769728 | 264.477048 | 264.565664 | 264.4797664 |
| 11/1/2013 1:40 | 0      | 264.4941624 | 264.4679728 | 264.472048 | 264.565664 | 264.4777664 |
| 11/1/2013 1:50 | 0      | 264.4926384 | 264.4789728 | 264.472048 | 264.564664 | 264.4797664 |
| 11/1/2013 2:00 | 0      | 264.4938576 | 264.4749728 | 264.473048 | 264.563664 | 264.4787664 |
| 11/1/2013 2:10 | 0      | 264.4895904 | 264.4629728 | 264.466048 | 264.560664 | 264.4747664 |
| 11/1/2013 2:20 | 0      | 264.4898952 | 264.4739728 | 264.467048 | 264.560664 | 264.4777664 |
| 11/1/2013 2:30 | 0      | 264.4874568 | 264.4609728 | 264.463048 | 264.563664 | 264.4727664 |
| 11/1/2013 2:40 | 0      | 264.4865424 | 264.4729728 | 264.462048 | 264.561664 | 264.4767664 |
| 11/1/2013 2:50 | 0      | 264.4862376 | 264.4589728 | 264.461048 | 264.560664 | 264.4737664 |
| 11/1/2013 3:00 | 0      | 264.4853232 | 264.4669728 | 264.461048 | 264.558664 | 264.4757664 |
| 11/1/2013 3:10 | 0      | 264.4822752 | 264.4539728 | 264.458048 | 264.560664 | 264.4707664 |
| 11/1/2013 3:20 | 0      | 264.4819704 | 264.4639728 | 264.458048 | 264.560664 | 264.4737664 |
| 11/1/2013 3:30 | 0      | 264.4804464 | 264.4559728 | 264.454048 | 264.557664 | 264.4697664 |
| 11/1/2013 3:40 | 0      | 264.481056  | 264.4559728 | 264.454048 | 264.557664 | 264.4687664 |
| 11/1/2013 3:50 | 0      | 264.4786176 | 264.4589728 | 264.454048 | 264.555664 | 264.4687664 |
| 11/1/2013 4:00 | 0      | 264.4789224 | 264.4509728 | 264.451048 | 264.554664 | 264.4677664 |
| 11/1/2013 4:10 | 0      | 264.4770936 | 264.4539728 | 264.453048 | 264.556664 | 264.4697664 |
| 11/1/2013 4:20 | 0      | 264.4761792 | 264.4529728 | 264.449048 | 264.553664 | 264.4667664 |
| 11/1/2013 4:30 | 0      | 264.4773984 | 264.4519728 | 264.452048 | 264.554664 | 264.4657664 |
| 11/1/2013 4:40 | 0      | 264.4746552 | 264.4499728 | 264.448048 | 264.552664 | 264.4627664 |
| 11/1/2013 4:50 | 0      | 264.4740456 | 264.4519728 | 264.448048 | 264.554664 | 264.4647664 |
| 11/1/2013 5:00 | 0      | 264.473436  | 264.4479728 | 264.445048 | 264.555664 | 264.4607664 |
| 11/1/2013 5:10 | 0      | 264.4725216 | 264.4509728 | 264.447048 | 264.551664 | 264.4607664 |
| 11/1/2013 5:20 | 0      | 264.4722168 | 264.4449728 | 264.442048 | 264.548664 | 264.4597664 |
| 11/1/2013 5:30 | 0      | 264.4713024 | 264.4479728 | 264.444048 | 264.550664 | 264.4617664 |
| 11/1/2013 5:40 | 0      | 264.4706928 | 264.4469728 | 264.445048 | 264.551664 | 264.4627664 |
| 11/1/2013 5:50 | 0      | 264.470388  | 264.4459728 | 264.441048 | 264.550664 | 264.4577664 |
| 11/1/2013 6:00 | 0      | 264.4700832 | 264.4499728 | 264.443048 | 264.550664 | 264.4607664 |
| 11/1/2013 6:10 | 0      | 264.4697784 | 264.4469728 | 264.442048 | 264.550664 | 264.4597664 |
| 11/1/2013 6:20 | 0      | 264.4691688 | 264.4449728 | 264.441048 | 264.547664 | 264.4587664 |
| 11/1/2013 6:30 | 0      | 264.468864  | 264.4449728 | 264.441048 | 264.546664 | 264.4567664 |
| 11/1/2013 6:40 | 0      | 264.468864  | 264.4469728 | 264.443048 | 264.548664 | 264.4587664 |
| 11/1/2013 6:50 | 0      | 264.4691688 | 264.4479728 | 264.443048 | 264.546664 | 264.4587664 |
| 11/1/2013 7:00 | 0      | 264.4691688 | 264.4529728 | 264.443048 | 264.546664 | 264.4587664 |
| 11/1/2013 7:10 | 0      | 264.470388  | 264.4539728 | 264.444048 | 264.545664 | 264.4597664 |
| 11/1/2013 7:20 | 0      | 264.471912  | 264.4579728 | 264.446048 | 264.546664 | 264.4597664 |
| 11/1/2013 7:30 | 0      | 264.4740456 | 264.4549728 | 264.450048 | 264.545664 | 264.4597664 |
| 11/1/2013 7:40 | 0      | 264.4722168 | 264.4609728 | 264.451048 | 264.542664 | 264.4617664 |



|                 |   |             |             |            |            |             |
|-----------------|---|-------------|-------------|------------|------------|-------------|
| 11/1/2013 7:50  | 0 | 264.4743504 | 264.4669728 | 264.454048 | 264.545664 | 264.4647664 |
| 11/1/2013 8:00  | 0 | 264.478008  | 264.4659728 | 264.455048 | 264.544664 | 264.4637664 |
| 11/1/2013 8:10  | 0 | 264.4786176 | 264.4729728 | 264.459048 | 264.543664 | 264.4657664 |
| 11/1/2013 8:20  | 0 | 264.481056  | 264.4779728 | 264.462048 | 264.541664 | 264.4697664 |
| 11/1/2013 8:30  | 0 | 264.4844088 | 264.4799728 | 264.464048 | 264.544664 | 264.4697664 |
| 11/1/2013 8:40  | 0 | 264.4874568 | 264.4819728 | 264.471048 | 264.544664 | 264.4717664 |
| 11/1/2013 8:50  | 0 | 264.4898952 | 264.4889728 | 264.475048 | 264.543664 | 264.4757664 |
| 11/1/2013 9:00  | 0 | 264.4914192 | 264.4939728 | 264.480048 | 264.542664 | 264.4767664 |
| 11/1/2013 9:10  | 0 | 264.4935528 | 264.4959728 | 264.480048 | 264.542664 | 264.4787664 |
| 11/1/2013 9:20  | 0 | 264.4953816 | 264.4909728 | 264.483048 | 264.542664 | 264.4767664 |
| 11/1/2013 9:30  | 0 | 264.4969056 | 264.4909728 | 264.486048 | 264.542664 | 264.4767664 |
| 11/1/2013 9:40  | 0 | 264.4956864 | 264.4919728 | 264.484048 | 264.539664 | 264.4777664 |
| 11/1/2013 9:50  | 0 | 264.4956864 | 264.4889728 | 264.487048 | 264.542664 | 264.4777664 |
| 11/1/2013 10:00 | 0 | 264.494772  | 264.4889728 | 264.484048 | 264.539664 | 264.4757664 |
| 11/1/2013 10:10 | 0 | 264.4956864 | 264.4929728 | 264.484048 | 264.542664 | 264.4787664 |
| 11/1/2013 10:20 | 0 | 264.4972104 | 264.4969728 | 264.486048 | 264.541664 | 264.4797664 |
| 11/1/2013 10:30 | 0 | 264.5005632 | 264.4919728 | 264.488048 | 264.540664 | 264.4797664 |
| 11/1/2013 10:40 | 0 | 264.4966008 | 264.4909728 | 264.484048 | 264.538664 | 264.4787664 |
| 11/1/2013 10:50 | 0 | 264.4975152 | 264.4809728 | 264.486048 | 264.540664 | 264.4787664 |
| 11/1/2013 11:00 | 0 | 264.4938576 | 264.4879728 | 264.483048 | 264.540664 | 264.4787664 |
| 11/1/2013 11:10 | 0 | 264.4953816 | 264.4819728 | 264.484048 | 264.541664 | 264.4777664 |
| 11/1/2013 11:20 | 0 | 264.4920288 | 264.4839728 | 264.482048 | 264.538664 | 264.4767664 |
| 11/1/2013 11:30 | 0 | 264.493248  | 264.4809728 | 264.482048 | 264.538664 | 264.4767664 |
| 11/1/2013 11:40 | 0 | 264.4892856 | 264.4809728 | 264.478048 | 264.536664 | 264.4767664 |
| 11/1/2013 11:50 | 0 | 264.4905048 | 264.4829728 | 264.476048 | 264.538664 | 264.4757664 |
| 11/1/2013 12:00 | 0 | 264.4883712 | 264.4749728 | 264.473048 | 264.539664 | 264.4717664 |
| 11/1/2013 12:10 | 0 | 264.4859328 | 264.4769728 | 264.473048 | 264.538664 | 264.4727664 |
| 11/1/2013 12:20 | 0 | 264.4862376 | 264.4689728 | 264.469048 | 264.533664 | 264.4667664 |
| 11/1/2013 12:30 | 0 | 264.4837992 | 264.4789728 | 264.469048 | 264.536664 | 264.4707664 |
| 11/1/2013 12:40 | 0 | 264.4859328 | 264.4739728 | 264.471048 | 264.536664 | 264.4707664 |
| 11/1/2013 12:50 | 0 | 264.4837992 | 264.4699728 | 264.469048 | 264.534664 | 264.4707664 |
| 11/1/2013 13:00 | 0 | 264.481056  | 264.4749728 | 264.467048 | 264.534664 | 264.4687664 |
| 11/1/2013 13:10 | 0 | 264.484104  | 264.4749728 | 264.467048 | 264.533664 | 264.4697664 |
| 11/1/2013 13:20 | 0 | 264.4834944 | 264.4699728 | 264.468048 | 264.534664 | 264.4667664 |
| 11/1/2013 13:30 | 0 | 264.481056  | 264.4739728 | 264.467048 | 264.532664 | 264.4687664 |
| 11/1/2013 13:40 | 0 | 264.4831896 | 264.4719728 | 264.465048 | 264.532664 | 264.4657664 |
| 11/1/2013 13:50 | 0 | 264.4819704 | 264.4709728 | 264.467048 | 264.534664 | 264.4677664 |
| 11/1/2013 14:00 | 0 | 264.481056  | 264.4729728 | 264.467048 | 264.533664 | 264.4687664 |
| 11/1/2013 14:10 | 0 | 264.4804464 | 264.4689728 | 264.466048 | 264.532664 | 264.4657664 |
| 11/1/2013 14:20 | 0 | 264.4798368 | 264.4739728 | 264.463048 | 264.529664 | 264.4677664 |
| 11/1/2013 14:30 | 0 | 264.4807512 | 264.4699728 | 264.466048 | 264.530664 | 264.4657664 |
| 11/1/2013 14:40 | 0 | 264.4770936 | 264.4689728 | 264.463048 | 264.529664 | 264.4657664 |
| 11/1/2013 14:50 | 0 | 264.4789224 | 264.4709728 | 264.464048 | 264.529664 | 264.4657664 |
| 11/1/2013 15:00 | 0 | 264.4783128 | 264.4609728 | 264.463048 | 264.531664 | 264.4627664 |
| 11/1/2013 15:10 | 0 | 264.4761792 | 264.4709728 | 264.463048 | 264.531664 | 264.4647664 |
| 11/1/2013 15:20 | 0 | 264.4783128 | 264.4659728 | 264.461048 | 264.529664 | 264.4647664 |
| 11/1/2013 15:30 | 0 | 264.4746552 | 264.4639728 | 264.461048 | 264.531664 | 264.4627664 |

|                 |   |             |             |            |            |             |
|-----------------|---|-------------|-------------|------------|------------|-------------|
| 11/1/2013 15:40 | 0 | 264.476484  | 264.4709728 | 264.461048 | 264.531664 | 264.4667664 |
| 11/1/2013 15:50 | 0 | 264.4761792 | 264.4579728 | 264.459048 | 264.531664 | 264.4617664 |
| 11/1/2013 16:00 | 0 | 264.4740456 | 264.4669728 | 264.457048 | 264.530664 | 264.4617664 |
| 11/1/2013 16:10 | 0 | 264.4752648 | 264.4589728 | 264.456048 | 264.527664 | 264.4607664 |
| 11/1/2013 16:20 | 0 | 264.4731312 | 264.4649728 | 264.456048 | 264.524664 | 264.4607664 |
| 11/1/2013 16:30 | 0 | 264.4746552 | 264.4639728 | 264.459048 | 264.528664 | 264.4637664 |
| 11/1/2013 16:40 | 0 | 264.4737408 | 264.4559728 | 264.456048 | 264.529664 | 264.4607664 |
| 11/1/2013 16:50 | 0 | 264.471912  | 264.4639728 | 264.456048 | 264.526664 | 264.4607664 |
| 11/1/2013 17:00 | 0 | 264.4740456 | 264.4589728 | 264.457048 | 264.524664 | 264.4597664 |
| 11/1/2013 17:10 | 0 | 264.470388  | 264.4589728 | 264.455048 | 264.524664 | 264.4597664 |
| 11/1/2013 17:20 | 0 | 264.4731312 | 264.4639728 | 264.457048 | 264.524664 | 264.4597664 |
| 11/1/2013 17:30 | 0 | 264.4731312 | 264.4599728 | 264.457048 | 264.524664 | 264.4597664 |
| 11/1/2013 17:40 | 0 | 264.470388  | 264.4639728 | 264.457048 | 264.527664 | 264.4607664 |
| 11/1/2013 17:50 | 0 | 264.4731312 | 264.4599728 | 264.459048 | 264.528664 | 264.4597664 |
| 11/1/2013 18:00 | 0 | 264.470388  | 264.4629728 | 264.454048 | 264.525664 | 264.4587664 |
| 11/1/2013 18:10 | 0 | 264.4737408 | 264.4639728 | 264.456048 | 264.525664 | 264.4587664 |
| 11/1/2013 18:20 | 0 | 264.473436  | 264.4619728 | 264.459048 | 264.525664 | 264.4607664 |
| 11/1/2013 18:30 | 0 | 264.4728264 | 264.4589728 | 264.457048 | 264.524664 | 264.4587664 |
| 11/1/2013 18:40 | 0 | 264.4716072 | 264.4639728 | 264.456048 | 264.522664 | 264.4597664 |
| 11/1/2013 18:50 | 0 | 264.4743504 | 264.4659728 | 264.458048 | 264.521664 | 264.4597664 |
| 11/1/2013 19:00 | 0 | 264.47496   | 264.4659728 | 264.461048 | 264.523664 | 264.4617664 |
| 11/1/2013 19:10 | 0 | 264.4743504 | 264.4639728 | 264.461048 | 264.521664 | 264.4597664 |
| 11/1/2013 19:20 | 0 | 264.4743504 | 264.4639728 | 264.462048 | 264.523664 | 264.4617664 |
| 11/1/2013 19:30 | 0 | 264.473436  | 264.4649728 | 264.461048 | 264.522664 | 264.4587664 |
| 11/1/2013 19:40 | 0 | 264.473436  | 264.4649728 | 264.459048 | 264.523664 | 264.4597664 |
| 11/1/2013 19:50 | 0 | 264.4731312 | 264.4639728 | 264.458048 | 264.520664 | 264.4597664 |
| 11/1/2013 20:00 | 0 | 264.473436  | 264.4659728 | 264.458048 | 264.520664 | 264.4587664 |
| 11/1/2013 20:10 | 0 | 264.4740456 | 264.4669728 | 264.461048 | 264.522664 | 264.4617664 |
| 11/1/2013 20:20 | 0 | 264.4743504 | 264.4699728 | 264.459048 | 264.521664 | 264.4607664 |
| 11/1/2013 20:30 | 0 | 264.4752648 | 264.4699728 | 264.460048 | 264.519664 | 264.4607664 |
| 11/1/2013 20:40 | 0 | 264.4758744 | 264.4699728 | 264.463048 | 264.518664 | 264.4607664 |
| 11/1/2013 20:50 | 0 | 264.4755696 | 264.4699728 | 264.462048 | 264.521664 | 264.4597664 |
| 11/1/2013 21:00 | 0 | 264.4755696 | 264.4689728 | 264.462048 | 264.517664 | 264.4597664 |
| 11/1/2013 21:10 | 0 | 264.4752648 | 264.4699728 | 264.462048 | 264.520664 | 264.4617664 |
| 11/1/2013 21:20 | 0 | 264.4746552 | 264.4689728 | 264.463048 | 264.519664 | 264.4617664 |
| 11/1/2013 21:30 | 0 | 264.4746552 | 264.4679728 | 264.462048 | 264.517664 | 264.4607664 |
| 11/1/2013 21:40 | 0 | 264.4746552 | 264.4709728 | 264.460048 | 264.517664 | 264.4607664 |
| 11/1/2013 21:50 | 0 | 264.4746552 | 264.4679728 | 264.461048 | 264.518664 | 264.4607664 |
| 11/1/2013 22:00 | 0 | 264.4743504 | 264.4699728 | 264.461048 | 264.518664 | 264.4597664 |
| 11/1/2013 22:10 | 0 | 264.4740456 | 264.4669728 | 264.461048 | 264.517664 | 264.4577664 |
| 11/1/2013 22:20 | 0 | 264.4740456 | 264.4689728 | 264.461048 | 264.517664 | 264.4617664 |
| 11/1/2013 22:30 | 0 | 264.4746552 | 264.4689728 | 264.461048 | 264.517664 | 264.4597664 |
| 11/1/2013 22:40 | 0 | 264.4743504 | 264.4639728 | 264.461048 | 264.516664 | 264.4607664 |
| 11/1/2013 22:50 | 0 | 264.473436  | 264.4669728 | 264.463048 | 264.517664 | 264.4617664 |
| 11/1/2013 23:00 | 0 | 264.4728264 | 264.4639728 | 264.460048 | 264.516664 | 264.4597664 |
| 11/1/2013 23:10 | 0 | 264.4725216 | 264.4659728 | 264.461048 | 264.516664 | 264.4607664 |
| 11/1/2013 23:20 | 0 | 264.4725216 | 264.4649728 | 264.460048 | 264.515664 | 264.4597664 |

|                 |   |             |             |            |            |             |
|-----------------|---|-------------|-------------|------------|------------|-------------|
| 11/1/2013 23:30 | 0 | 264.4716072 | 264.4629728 | 264.459048 | 264.515664 | 264.4597664 |
| 11/1/2013 23:40 | 0 | 264.4713024 | 264.4629728 | 264.458048 | 264.516664 | 264.4567664 |
| 11/1/2013 23:50 | 0 | 264.470388  | 264.4599728 | 264.458048 | 264.514664 | 264.4567664 |
| 11/2/2013 0:00  | 0 | 264.468864  | 264.4559728 | 264.454048 | 264.511664 | 264.4557664 |
| 11/2/2013 0:10  | 0 | 264.4682544 | 264.4549728 | 264.452048 | 264.514664 | 264.4557664 |
| 11/2/2013 0:20  | 0 | 264.4667304 | 264.4509728 | 264.449048 | 264.513664 | 264.4527664 |
| 11/2/2013 0:30  | 0 | 264.4664256 | 264.4559728 | 264.450048 | 264.512664 | 264.4557664 |
| 11/2/2013 0:40  | 0 | 264.4670352 | 264.4549728 | 264.450048 | 264.512664 | 264.4547664 |
| 11/2/2013 0:50  | 0 | 264.465816  | 264.4529728 | 264.450048 | 264.512664 | 264.4507664 |
| 11/2/2013 1:00  | 0 | 264.4636824 | 264.4499728 | 264.447048 | 264.512664 | 264.4517664 |
| 11/2/2013 1:10  | 0 | 264.4645968 | 264.4529728 | 264.449048 | 264.513664 | 264.4547664 |
| 11/2/2013 1:20  | 0 | 264.4630728 | 264.4399728 | 264.446048 | 264.511664 | 264.4517664 |
| 11/2/2013 1:30  | 0 | 264.4600248 | 264.4469728 | 264.442048 | 264.510664 | 264.4517664 |
| 11/2/2013 1:40  | 0 | 264.461244  | 264.4359728 | 264.440048 | 264.513664 | 264.4487664 |
| 11/2/2013 1:50  | 0 | 264.4575864 | 264.4429728 | 264.436048 | 264.509664 | 264.4477664 |
| 11/2/2013 2:00  | 0 | 264.4578912 | 264.4299728 | 264.435048 | 264.509664 | 264.4427664 |
| 11/2/2013 2:10  | 0 | 264.456672  | 264.4379728 | 264.435048 | 264.511664 | 264.4477664 |
| 11/2/2013 2:20  | 0 | 264.453624  | 264.4369728 | 264.432048 | 264.509664 | 264.4447664 |
| 11/2/2013 2:30  | 0 | 264.4557576 | 264.4289728 | 264.432048 | 264.511664 | 264.4467664 |
| 11/2/2013 2:40  | 0 | 264.4508808 | 264.4369728 | 264.428048 | 264.508664 | 264.4447664 |
| 11/2/2013 2:50  | 0 | 264.4514904 | 264.4209728 | 264.427048 | 264.508664 | 264.4407664 |
| 11/2/2013 3:00  | 0 | 264.449052  | 264.4289728 | 264.424048 | 264.508664 | 264.4417664 |
| 11/2/2013 3:10  | 0 | 264.4472232 | 264.4249728 | 264.421048 | 264.507664 | 264.4397664 |
| 11/2/2013 3:20  | 0 | 264.4481376 | 264.4229728 | 264.424048 | 264.507664 | 264.4407664 |
| 11/2/2013 3:30  | 0 | 264.4450896 | 264.4259728 | 264.421048 | 264.508664 | 264.4397664 |
| 11/2/2013 3:40  | 0 | 264.4453944 | 264.4169728 | 264.419048 | 264.503664 | 264.4367664 |
| 11/2/2013 3:50  | 0 | 264.4441752 | 264.4229728 | 264.419048 | 264.506664 | 264.4377664 |
| 11/2/2013 4:00  | 0 | 264.4423464 | 264.4169728 | 264.416048 | 264.504664 | 264.4337664 |
| 11/2/2013 4:10  | 0 | 264.4420416 | 264.4189728 | 264.417048 | 264.507664 | 264.4367664 |
| 11/2/2013 4:20  | 0 | 264.4426512 | 264.4189728 | 264.417048 | 264.505664 | 264.4357664 |
| 11/2/2013 4:30  | 0 | 264.439908  | 264.4129728 | 264.413048 | 264.504664 | 264.4327664 |
| 11/2/2013 4:40  | 0 | 264.4402128 | 264.4159728 | 264.413048 | 264.503664 | 264.4327664 |
| 11/2/2013 4:50  | 0 | 264.438384  | 264.4169728 | 264.411048 | 264.504664 | 264.4337664 |
| 11/2/2013 5:00  | 0 | 264.4380792 | 264.4109728 | 264.411048 | 264.504664 | 264.4307664 |
| 11/2/2013 5:10  | 0 | 264.4365552 | 264.4159728 | 264.411048 | 264.504664 | 264.4307664 |
| 11/2/2013 5:20  | 0 | 264.43686   | 264.4109728 | 264.410048 | 264.501664 | 264.4307664 |
| 11/2/2013 5:30  | 0 | 264.4359456 | 264.4129728 | 264.410048 | 264.502664 | 264.4317664 |
| 11/2/2013 5:40  | 0 | 264.4347264 | 264.4099728 | 264.406048 | 264.500664 | 264.4297664 |
| 11/2/2013 5:50  | 0 | 264.4347264 | 264.4149728 | 264.409048 | 264.500664 | 264.4297664 |
| 11/2/2013 6:00  | 0 | 264.433812  | 264.4149728 | 264.409048 | 264.499664 | 264.4287664 |
| 11/2/2013 6:10  | 0 | 264.433812  | 264.4089728 | 264.407048 | 264.498664 | 264.4257664 |
| 11/2/2013 6:20  | 0 | 264.433812  | 264.4109728 | 264.410048 | 264.500664 | 264.4257664 |
| 11/2/2013 6:30  | 0 | 264.4328976 | 264.4129728 | 264.407048 | 264.497664 | 264.4267664 |
| 11/2/2013 6:40  | 0 | 264.4325928 | 264.4149728 | 264.406048 | 264.499664 | 264.4267664 |
| 11/2/2013 6:50  | 0 | 264.4332024 | 264.4119728 | 264.406048 | 264.499664 | 264.4257664 |
| 11/2/2013 7:00  | 0 | 264.432288  | 264.4119728 | 264.405048 | 264.498664 | 264.4237664 |
| 11/2/2013 7:10  | 0 | 264.432288  | 264.4119728 | 264.405048 | 264.497664 | 264.4237664 |

|                 |   |             |             |            |            |             |
|-----------------|---|-------------|-------------|------------|------------|-------------|
| 11/2/2013 7:20  | 0 | 264.4325928 | 264.4149728 | 264.407048 | 264.497664 | 264.4277664 |
| 11/2/2013 7:30  | 0 | 264.4332024 | 264.4119728 | 264.410048 | 264.497664 | 264.4257664 |
| 11/2/2013 7:40  | 0 | 264.4319832 | 264.4159728 | 264.408048 | 264.494664 | 264.4267664 |
| 11/2/2013 7:50  | 0 | 264.4328976 | 264.4159728 | 264.409048 | 264.496664 | 264.4267664 |
| 11/2/2013 8:00  | 0 | 264.4328976 | 264.4149728 | 264.411048 | 264.497664 | 264.4277664 |
| 11/2/2013 8:10  | 0 | 264.4335072 | 264.4169728 | 264.412048 | 264.494664 | 264.4277664 |
| 11/2/2013 8:20  | 0 | 264.433812  | 264.4219728 | 264.413048 | 264.496664 | 264.4267664 |
| 11/2/2013 8:30  | 0 | 264.4356408 | 264.4219728 | 264.414048 | 264.494664 | 264.4267664 |
| 11/2/2013 8:40  | 0 | 264.4365552 | 264.4259728 | 264.414048 | 264.492664 | 264.4257664 |
| 11/2/2013 8:50  | 0 | 264.4396032 | 264.4309728 | 264.421048 | 264.492664 | 264.4307664 |
| 11/2/2013 9:00  | 0 | 264.441432  | 264.4299728 | 264.422048 | 264.494664 | 264.4307664 |
| 11/2/2013 9:10  | 0 | 264.4408224 | 264.4319728 | 264.424048 | 264.494664 | 264.4317664 |
| 11/2/2013 9:20  | 0 | 264.4426512 | 264.4339728 | 264.422048 | 264.491664 | 264.4317664 |
| 11/2/2013 9:30  | 0 | 264.4435656 | 264.4359728 | 264.426048 | 264.492664 | 264.4327664 |
| 11/2/2013 9:40  | 0 | 264.446004  | 264.4399728 | 264.433048 | 264.493664 | 264.4357664 |
| 11/2/2013 9:50  | 0 | 264.4472232 | 264.4459728 | 264.433048 | 264.492664 | 264.4357664 |
| 11/2/2013 10:00 | 0 | 264.4499664 | 264.4469728 | 264.438048 | 264.495664 | 264.4387664 |
| 11/2/2013 10:10 | 0 | 264.4521    | 264.4539728 | 264.440048 | 264.490664 | 264.4407664 |
| 11/2/2013 10:20 | 0 | 264.4548432 | 264.4549728 | 264.442048 | 264.492664 | 264.4427664 |
| 11/2/2013 10:30 | 0 | 264.4575864 | 264.4589728 | 264.446048 | 264.492664 | 264.4447664 |
| 11/2/2013 10:40 | 0 | 264.4600248 | 264.4649728 | 264.450048 | 264.492664 | 264.4457664 |
| 11/2/2013 10:50 | 0 | 264.4630728 | 264.4649728 | 264.454048 | 264.490664 | 264.4477664 |
| 11/2/2013 11:00 | 0 | 264.464292  | 264.4709728 | 264.454048 | 264.491664 | 264.4487664 |
| 11/2/2013 11:10 | 0 | 264.4670352 | 264.4709728 | 264.461048 | 264.492664 | 264.4497664 |
| 11/2/2013 11:20 | 0 | 264.4691688 | 264.4689728 | 264.461048 | 264.491664 | 264.4517664 |
| 11/2/2013 11:30 | 0 | 264.4697784 | 264.4709728 | 264.464048 | 264.491664 | 264.4517664 |
| 11/2/2013 11:40 | 0 | 264.4700832 | 264.4769728 | 264.464048 | 264.491664 | 264.4537664 |
| 11/2/2013 11:50 | 0 | 264.4713024 | 264.4729728 | 264.466048 | 264.491664 | 264.4527664 |
| 11/2/2013 12:00 | 0 | 264.4731312 | 264.4699728 | 264.466048 | 264.490664 | 264.4527664 |
| 11/2/2013 12:10 | 0 | 264.4716072 | 264.4799728 | 264.468048 | 264.488664 | 264.4557664 |
| 11/2/2013 12:20 | 0 | 264.4755696 | 264.4799728 | 264.470048 | 264.490664 | 264.4597664 |
| 11/2/2013 12:30 | 0 | 264.4777032 | 264.4829728 | 264.473048 | 264.489664 | 264.4597664 |
| 11/2/2013 12:40 | 0 | 264.4783128 | 264.4849728 | 264.473048 | 264.487664 | 264.4597664 |
| 11/2/2013 12:50 | 0 | 264.4804464 | 264.4799728 | 264.476048 | 264.487664 | 264.4587664 |
| 11/2/2013 13:00 | 0 | 264.481056  | 264.4809728 | 264.477048 | 264.489664 | 264.4617664 |
| 11/2/2013 13:10 | 0 | 264.479532  | 264.4799728 | 264.474048 | 264.488664 | 264.4597664 |
| 11/2/2013 13:20 | 0 | 264.4798368 | 264.4739728 | 264.474048 | 264.488664 | 264.4587664 |
| 11/2/2013 13:30 | 0 | 264.4792272 | 264.4759728 | 264.474048 | 264.487664 | 264.4607664 |
| 11/2/2013 13:40 | 0 | 264.4783128 | 264.4749728 | 264.473048 | 264.488664 | 264.4617664 |
| 11/2/2013 13:50 | 0 | 264.4777032 | 264.4719728 | 264.470048 | 264.487664 | 264.4607664 |
| 11/2/2013 14:00 | 0 | 264.4773984 | 264.4719728 | 264.468048 | 264.487664 | 264.4587664 |
| 11/2/2013 14:10 | 0 | 264.476484  | 264.4689728 | 264.466048 | 264.487664 | 264.4567664 |
| 11/2/2013 14:20 | 0 | 264.4755696 | 264.4689728 | 264.466048 | 264.486664 | 264.4567664 |
| 11/2/2013 14:30 | 0 | 264.47496   | 264.4719728 | 264.469048 | 264.488664 | 264.4597664 |
| 11/2/2013 14:40 | 0 | 264.4743504 | 264.4689728 | 264.465048 | 264.485664 | 264.4567664 |
| 11/2/2013 14:50 | 0 | 264.4737408 | 264.4669728 | 264.465048 | 264.488664 | 264.4587664 |
| 11/2/2013 15:00 | 0 | 264.4731312 | 264.4669728 | 264.465048 | 264.488664 | 264.4587664 |

|                 |   |             |             |            |            |             |
|-----------------|---|-------------|-------------|------------|------------|-------------|
| 11/2/2013 15:10 | 0 | 264.4725216 | 264.4659728 | 264.462048 | 264.487664 | 264.4567664 |
| 11/2/2013 15:20 | 0 | 264.4716072 | 264.4669728 | 264.462048 | 264.487664 | 264.4567664 |
| 11/2/2013 15:30 | 0 | 264.4713024 | 264.4659728 | 264.462048 | 264.487664 | 264.4567664 |
| 11/2/2013 15:40 | 0 | 264.470388  | 264.4649728 | 264.463048 | 264.486664 | 264.4567664 |
| 11/2/2013 15:50 | 0 | 264.4694736 | 264.4619728 | 264.460048 | 264.485664 | 264.4547664 |
| 11/2/2013 16:00 | 0 | 264.4685592 | 264.4639728 | 264.459048 | 264.486664 | 264.4547664 |
| 11/2/2013 16:10 | 0 | 264.4679496 | 264.4609728 | 264.458048 | 264.485664 | 264.4547664 |
| 11/2/2013 16:20 | 0 | 264.4667304 | 264.4589728 | 264.457048 | 264.487664 | 264.4517664 |
| 11/2/2013 16:30 | 0 | 264.4661208 | 264.4589728 | 264.456048 | 264.487664 | 264.4527664 |
| 11/2/2013 16:40 | 0 | 264.4652064 | 264.4559728 | 264.453048 | 264.484664 | 264.4517664 |
| 11/2/2013 16:50 | 0 | 264.4652064 | 264.4609728 | 264.454048 | 264.487664 | 264.4537664 |
| 11/2/2013 17:00 | 0 | 264.4652064 | 264.4589728 | 264.454048 | 264.485664 | 264.4517664 |
| 11/2/2013 17:10 | 0 | 264.4652064 | 264.4569728 | 264.454048 | 264.487664 | 264.4527664 |
| 11/2/2013 17:20 | 0 | 264.4645968 | 264.4539728 | 264.455048 | 264.485664 | 264.4497664 |
| 11/2/2013 17:30 | 0 | 264.4636824 | 264.4559728 | 264.452048 | 264.487664 | 264.4487664 |
| 11/2/2013 17:40 | 0 | 264.4630728 | 264.4589728 | 264.453048 | 264.487664 | 264.4517664 |
| 11/2/2013 17:50 | 0 | 264.4630728 | 264.4579728 | 264.453048 | 264.487664 | 264.4497664 |
| 11/2/2013 18:00 | 0 | 264.4630728 | 264.4579728 | 264.453048 | 264.487664 | 264.4517664 |
| 11/2/2013 18:10 | 0 | 264.4630728 | 264.4579728 | 264.452048 | 264.486664 | 264.4507664 |
| 11/2/2013 18:20 | 0 | 264.4630728 | 264.4559728 | 264.452048 | 264.486664 | 264.4487664 |
| 11/2/2013 18:30 | 0 | 264.4630728 | 264.4559728 | 264.450048 | 264.488664 | 264.4507664 |
| 11/2/2013 18:40 | 0 | 264.462768  | 264.4559728 | 264.452048 | 264.486664 | 264.4507664 |
| 11/2/2013 18:50 | 0 | 264.4624632 | 264.4549728 | 264.449048 | 264.484664 | 264.4497664 |
| 11/2/2013 19:00 | 0 | 264.4618536 | 264.4569728 | 264.449048 | 264.484664 | 264.4497664 |
| 11/2/2013 19:10 | 0 | 264.4615488 | 264.4549728 | 264.452048 | 264.484664 | 264.4507664 |
| 11/2/2013 19:20 | 0 | 264.4615488 | 264.4539728 | 264.449048 | 264.485664 | 264.4497664 |
| 11/2/2013 19:30 | 0 | 264.461244  | 264.4539728 | 264.448048 | 264.485664 | 264.4467664 |
| 11/2/2013 19:40 | 0 | 264.461244  | 264.4539728 | 264.448048 | 264.483664 | 264.4457664 |
| 11/2/2013 19:50 | 0 | 264.4606344 | 264.4519728 | 264.449048 | 264.482664 | 264.4477664 |
| 11/2/2013 20:00 | 0 | 264.4606344 | 264.4549728 | 264.448048 | 264.485664 | 264.4497664 |
| 11/2/2013 20:10 | 0 | 264.4600248 | 264.4539728 | 264.448048 | 264.482664 | 264.4477664 |
| 11/2/2013 20:20 | 0 | 264.45972   | 264.4519728 | 264.449048 | 264.485664 | 264.4477664 |
| 11/2/2013 20:30 | 0 | 264.45972   | 264.4509728 | 264.446048 | 264.482664 | 264.4467664 |
| 11/2/2013 20:40 | 0 | 264.45972   | 264.4519728 | 264.445048 | 264.482664 | 264.4467664 |
| 11/2/2013 20:50 | 0 | 264.4594152 | 264.4519728 | 264.446048 | 264.480664 | 264.4447664 |
| 11/2/2013 21:00 | 0 | 264.4594152 | 264.4519728 | 264.448048 | 264.481664 | 264.4457664 |
| 11/2/2013 21:10 | 0 | 264.4591104 | 264.4549728 | 264.448048 | 264.481664 | 264.4457664 |
| 11/2/2013 21:20 | 0 | 264.4591104 | 264.4529728 | 264.449048 | 264.483664 | 264.4457664 |
| 11/2/2013 21:30 | 0 | 264.4588056 | 264.4519728 | 264.448048 | 264.481664 | 264.4447664 |
| 11/2/2013 21:40 | 0 | 264.4585008 | 264.4539728 | 264.448048 | 264.481664 | 264.4477664 |
| 11/2/2013 21:50 | 0 | 264.458196  | 264.4509728 | 264.445048 | 264.480664 | 264.4447664 |
| 11/2/2013 22:00 | 0 | 264.4575864 | 264.4509728 | 264.445048 | 264.482664 | 264.4447664 |
| 11/2/2013 22:10 | 0 | 264.4572816 | 264.4509728 | 264.445048 | 264.482664 | 264.4447664 |
| 11/2/2013 22:20 | 0 | 264.4569768 | 264.4489728 | 264.445048 | 264.481664 | 264.4447664 |
| 11/2/2013 22:30 | 0 | 264.456672  | 264.4489728 | 264.445048 | 264.480664 | 264.4447664 |
| 11/2/2013 22:40 | 0 | 264.4560624 | 264.4479728 | 264.444048 | 264.480664 | 264.4437664 |
| 11/2/2013 22:50 | 0 | 264.4554528 | 264.4469728 | 264.444048 | 264.480664 | 264.4447664 |

|                 |   |             |             |            |            |             |
|-----------------|---|-------------|-------------|------------|------------|-------------|
| 11/2/2013 23:00 | 0 | 264.455148  | 264.4459728 | 264.441048 | 264.478664 | 264.4427664 |
| 11/2/2013 23:10 | 0 | 264.4545384 | 264.4459728 | 264.441048 | 264.478664 | 264.4427664 |
| 11/2/2013 23:20 | 0 | 264.4542336 | 264.4429728 | 264.441048 | 264.477664 | 264.4417664 |
| 11/2/2013 23:30 | 0 | 264.453624  | 264.4439728 | 264.441048 | 264.479664 | 264.4397664 |
| 11/2/2013 23:40 | 0 | 264.4530144 | 264.4439728 | 264.440048 | 264.480664 | 264.4427664 |
| 11/2/2013 23:50 | 0 | 264.4527096 | 264.4409728 | 264.437048 | 264.478664 | 264.4397664 |
| 11/3/2013 0:00  | 0 | 264.4517952 | 264.4409728 | 264.437048 | 264.478664 | 264.4377664 |
| 11/3/2013 0:10  | 0 | 264.450576  | 264.4379728 | 264.436048 | 264.478664 | 264.4377664 |
| 11/3/2013 0:20  | 0 | 264.4493568 | 264.4279728 | 264.431048 | 264.477664 | 264.4337664 |
| 11/3/2013 0:30  | 0 | 264.4478328 | 264.4409728 | 264.434048 | 264.480664 | 264.4397664 |
| 11/3/2013 0:40  | 0 | 264.4487472 | 264.4309728 | 264.433048 | 264.480664 | 264.4357664 |
| 11/3/2013 0:50  | 0 | 264.446004  | 264.4379728 | 264.429048 | 264.476664 | 264.4367664 |
| 11/3/2013 1:00  | 0 | 264.4472232 | 264.4279728 | 264.429048 | 264.479664 | 264.4337664 |
| 11/3/2013 1:10  | 0 | 264.4447848 | 264.4379728 | 264.433048 | 264.479664 | 264.4367664 |
| 11/3/2013 1:20  | 0 | 264.4438704 | 264.4299728 | 264.426048 | 264.476664 | 264.4317664 |
| 11/3/2013 1:30  | 0 | 264.4438704 | 264.4249728 | 264.427048 | 264.476664 | 264.4317664 |
| 11/3/2013 1:40  | 0 | 264.442956  | 264.4309728 | 264.427048 | 264.476664 | 264.4327664 |
| 11/3/2013 1:50  | 0 | 264.4392984 | 264.4309728 | 264.422048 | 264.475664 | 264.4297664 |
| 11/3/2013 2:00  | 0 | 264.4408224 | 264.4229728 | 264.420048 | 264.474664 | 264.4267664 |
| 11/3/2013 2:10  | 0 | 264.4402128 | 264.4149728 | 264.419048 | 264.474664 | 264.4257664 |
| 11/3/2013 2:20  | 0 | 264.4377744 | 264.4259728 | 264.419048 | 264.475664 | 264.4297664 |
| 11/3/2013 2:30  | 0 | 264.4356408 | 264.4239728 | 264.417048 | 264.475664 | 264.4267664 |
| 11/3/2013 2:40  | 0 | 264.4362504 | 264.4159728 | 264.417048 | 264.476664 | 264.4257664 |
| 11/3/2013 2:50  | 0 | 264.4350312 | 264.4139728 | 264.414048 | 264.476664 | 264.4237664 |
| 11/3/2013 3:00  | 0 | 264.4316784 | 264.4189728 | 264.412048 | 264.475664 | 264.4257664 |
| 11/3/2013 3:10  | 0 | 264.4325928 | 264.4139728 | 264.411048 | 264.475664 | 264.4257664 |
| 11/3/2013 3:20  | 0 | 264.4325928 | 264.4139728 | 264.411048 | 264.475664 | 264.4237664 |
| 11/3/2013 3:30  | 0 | 264.4304592 | 264.4119728 | 264.410048 | 264.473664 | 264.4217664 |
| 11/3/2013 3:40  | 0 | 264.4301544 | 264.4209728 | 264.408048 | 264.471664 | 264.4257664 |
| 11/3/2013 3:50  | 0 | 264.4304592 | 264.4089728 | 264.406048 | 264.475664 | 264.4197664 |
| 11/3/2013 4:00  | 0 | 264.4295448 | 264.4089728 | 264.407048 | 264.474664 | 264.4217664 |
| 11/3/2013 4:10  | 0 | 264.4289352 | 264.4079728 | 264.403048 | 264.475664 | 264.4207664 |
| 11/3/2013 4:20  | 0 | 264.427716  | 264.4059728 | 264.402048 | 264.471664 | 264.4187664 |
| 11/3/2013 4:30  | 0 | 264.4271064 | 264.4119728 | 264.403048 | 264.472664 | 264.4197664 |
| 11/3/2013 4:40  | 0 | 264.4274112 | 264.4039728 | 264.402048 | 264.471664 | 264.4187664 |
| 11/3/2013 4:50  | 0 | 264.426192  | 264.4069728 | 264.402048 | 264.472664 | 264.4177664 |
| 11/3/2013 5:00  | 0 | 264.4255824 | 264.4059728 | 264.401048 | 264.471664 | 264.4177664 |
| 11/3/2013 5:10  | 0 | 264.4255824 | 264.4069728 | 264.402048 | 264.471664 | 264.4177664 |
| 11/3/2013 5:20  | 0 | 264.4249728 | 264.4039728 | 264.402048 | 264.474664 | 264.4197664 |
| 11/3/2013 5:30  | 0 | 264.4240584 | 264.4039728 | 264.400048 | 264.474664 | 264.4177664 |
| 11/3/2013 5:40  | 0 | 264.4234488 | 264.4039728 | 264.398048 | 264.470664 | 264.4157664 |
| 11/3/2013 5:50  | 0 | 264.423144  | 264.4029728 | 264.398048 | 264.470664 | 264.4157664 |
| 11/3/2013 6:00  | 0 | 264.4225344 | 264.3999728 | 264.398048 | 264.468664 | 264.4157664 |
| 11/3/2013 6:10  | 0 | 264.4222296 | 264.4019728 | 264.399048 | 264.468664 | 264.4167664 |
| 11/3/2013 6:20  | 0 | 264.4219248 | 264.4019728 | 264.399048 | 264.472664 | 264.4147664 |
| 11/3/2013 6:30  | 0 | 264.42162   | 264.4019728 | 264.397048 | 264.469664 | 264.4127664 |
| 11/3/2013 6:40  | 0 | 264.42162   | 264.4039728 | 264.398048 | 264.471664 | 264.4147664 |

|                 |   |             |             |            |            |             |
|-----------------|---|-------------|-------------|------------|------------|-------------|
| 11/3/2013 6:50  | 0 | 264.4210104 | 264.4009728 | 264.397048 | 264.469664 | 264.4127664 |
| 11/3/2013 7:00  | 0 | 264.4207056 | 264.4019728 | 264.398048 | 264.468664 | 264.4127664 |
| 11/3/2013 7:10  | 0 | 264.4207056 | 264.4009728 | 264.397048 | 264.468664 | 264.4117664 |
| 11/3/2013 7:20  | 0 | 264.420096  | 264.4019728 | 264.397048 | 264.467664 | 264.4127664 |
| 11/3/2013 7:30  | 0 | 264.4197912 | 264.4019728 | 264.398048 | 264.469664 | 264.4127664 |
| 11/3/2013 7:40  | 0 | 264.4197912 | 264.4019728 | 264.401048 | 264.469664 | 264.4157664 |
| 11/3/2013 7:50  | 0 | 264.4197912 | 264.4039728 | 264.398048 | 264.469664 | 264.4157664 |
| 11/3/2013 8:00  | 0 | 264.4194864 | 264.4039728 | 264.397048 | 264.470664 | 264.4147664 |
| 11/3/2013 8:10  | 0 | 264.4194864 | 264.4089728 | 264.398048 | 264.469664 | 264.4147664 |
| 11/3/2013 8:20  | 0 | 264.4207056 | 264.4019728 | 264.399048 | 264.467664 | 264.4127664 |
| 11/3/2013 8:30  | 0 | 264.4194864 | 264.4069728 | 264.398048 | 264.467664 | 264.4147664 |
| 11/3/2013 8:40  | 0 | 264.4213152 | 264.4069728 | 264.399048 | 264.468664 | 264.4137664 |
| 11/3/2013 8:50  | 0 | 264.4210104 | 264.4119728 | 264.399048 | 264.468664 | 264.4137664 |
| 11/3/2013 9:00  | 0 | 264.4219248 | 264.4069728 | 264.401048 | 264.465664 | 264.4127664 |
| 11/3/2013 9:10  | 0 | 264.4222296 | 264.4119728 | 264.401048 | 264.465664 | 264.4127664 |
| 11/3/2013 9:20  | 0 | 264.4243632 | 264.4119728 | 264.403048 | 264.465664 | 264.4147664 |
| 11/3/2013 9:30  | 0 | 264.424668  | 264.4149728 | 264.405048 | 264.465664 | 264.4147664 |
| 11/3/2013 9:40  | 0 | 264.4264968 | 264.4249728 | 264.410048 | 264.464664 | 264.4207664 |
| 11/3/2013 9:50  | 0 | 264.4304592 | 264.4229728 | 264.412048 | 264.465664 | 264.4197664 |
| 11/3/2013 10:00 | 0 | 264.4319832 | 264.4269728 | 264.414048 | 264.463664 | 264.4207664 |
| 11/3/2013 10:10 | 0 | 264.4341168 | 264.4309728 | 264.416048 | 264.459664 | 264.4207664 |
| 11/3/2013 10:20 | 0 | 264.4362504 | 264.4329728 | 264.421048 | 264.461664 | 264.4227664 |
| 11/3/2013 10:30 | 0 | 264.438384  | 264.4409728 | 264.425048 | 264.462664 | 264.4277664 |
| 11/3/2013 10:40 | 0 | 264.4411272 | 264.4459728 | 264.429048 | 264.462664 | 264.4277664 |
| 11/3/2013 10:50 | 0 | 264.4447848 | 264.4469728 | 264.432048 | 264.462664 | 264.4307664 |
| 11/3/2013 11:00 | 0 | 264.4478328 | 264.4529728 | 264.439048 | 264.465664 | 264.4347664 |
| 11/3/2013 11:10 | 0 | 264.449052  | 264.4589728 | 264.442048 | 264.462664 | 264.4377664 |
| 11/3/2013 11:20 | 0 | 264.4527096 | 264.4639728 | 264.447048 | 264.462664 | 264.4387664 |
| 11/3/2013 11:30 | 0 | 264.455148  | 264.4689728 | 264.450048 | 264.461664 | 264.4417664 |
| 11/3/2013 11:40 | 0 | 264.4585008 | 264.4699728 | 264.455048 | 264.464664 | 264.4427664 |
| 11/3/2013 11:50 | 0 | 264.4618536 | 264.4669728 | 264.458048 | 264.461664 | 264.4437664 |
| 11/3/2013 12:00 | 0 | 264.462768  | 264.4749728 | 264.461048 | 264.464664 | 264.4467664 |
| 11/3/2013 12:10 | 0 | 264.4649016 | 264.4689728 | 264.462048 | 264.460664 | 264.4447664 |
| 11/3/2013 12:20 | 0 | 264.4664256 | 264.4719728 | 264.463048 | 264.461664 | 264.4497664 |
| 11/3/2013 12:30 | 0 | 264.4670352 | 264.4779728 | 264.468048 | 264.464664 | 264.4517664 |
| 11/3/2013 12:40 | 0 | 264.4694736 | 264.4799728 | 264.468048 | 264.465664 | 264.4537664 |
| 11/3/2013 12:50 | 0 | 264.4713024 | 264.4739728 | 264.469048 | 264.466664 | 264.4527664 |
| 11/3/2013 13:00 | 0 | 264.4722168 | 264.4779728 | 264.472048 | 264.464664 | 264.4547664 |
| 11/3/2013 13:10 | 0 | 264.4731312 | 264.4839728 | 264.473048 | 264.463664 | 264.4557664 |
| 11/3/2013 13:20 | 0 | 264.4746552 | 264.4759728 | 264.471048 | 264.459664 | 264.4527664 |
| 11/3/2013 13:30 | 0 | 264.4752648 | 264.4819728 | 264.474048 | 264.465664 | 264.4587664 |
| 11/3/2013 13:40 | 0 | 264.47496   | 264.4799728 | 264.472048 | 264.463664 | 264.4567664 |
| 11/3/2013 13:50 | 0 | 264.4758744 | 264.4749728 | 264.472048 | 264.463664 | 264.4567664 |
| 11/3/2013 14:00 | 0 | 264.4755696 | 264.4799728 | 264.472048 | 264.463664 | 264.4547664 |
| 11/3/2013 14:10 | 0 | 264.4752648 | 264.4789728 | 264.474048 | 264.463664 | 264.4577664 |
| 11/3/2013 14:20 | 0 | 264.4758744 | 264.4759728 | 264.471048 | 264.463664 | 264.4557664 |
| 11/3/2013 14:30 | 0 | 264.4761792 | 264.4769728 | 264.470048 | 264.463664 | 264.4567664 |

|                 |   |             |             |            |            |             |
|-----------------|---|-------------|-------------|------------|------------|-------------|
| 11/3/2013 14:40 | 0 | 264.4758744 | 264.4799728 | 264.473048 | 264.463664 | 264.4587664 |
| 11/3/2013 14:50 | 0 | 264.476484  | 264.4759728 | 264.473048 | 264.463664 | 264.4567664 |
| 11/3/2013 15:00 | 0 | 264.476484  | 264.4779728 | 264.473048 | 264.463664 | 264.4587664 |
| 11/3/2013 15:10 | 0 | 264.4755696 | 264.4729728 | 264.469048 | 264.462664 | 264.4557664 |
| 11/3/2013 15:20 | 0 | 264.4746552 | 264.4709728 | 264.469048 | 264.463664 | 264.4567664 |
| 11/3/2013 15:30 | 0 | 264.4743504 | 264.4729728 | 264.470048 | 264.466664 | 264.4567664 |
| 11/3/2013 15:40 | 0 | 264.4731312 | 264.4739728 | 264.468048 | 264.465664 | 264.4577664 |
| 11/3/2013 15:50 | 0 | 264.4728264 | 264.4719728 | 264.469048 | 264.466664 | 264.4587664 |
| 11/3/2013 16:00 | 0 | 264.4722168 | 264.4709728 | 264.465048 | 264.464664 | 264.4567664 |
| 11/3/2013 16:10 | 0 | 264.4709976 | 264.4669728 | 264.464048 | 264.465664 | 264.4527664 |
| 11/3/2013 16:20 | 0 | 264.470388  | 264.4639728 | 264.461048 | 264.460664 | 264.4527664 |
| 11/3/2013 16:30 | 0 | 264.4694736 | 264.4679728 | 264.464048 | 264.466664 | 264.4567664 |
| 11/3/2013 16:40 | 0 | 264.468864  | 264.4669728 | 264.462048 | 264.462664 | 264.4557664 |
| 11/3/2013 16:50 | 0 | 264.4685592 | 264.4639728 | 264.462048 | 264.465664 | 264.4557664 |
| 11/3/2013 17:00 | 0 | 264.4679496 | 264.4649728 | 264.457048 | 264.462664 | 264.4517664 |
| 11/3/2013 17:10 | 0 | 264.46734   | 264.4629728 | 264.458048 | 264.464664 | 264.4547664 |
| 11/3/2013 17:20 | 0 | 264.4664256 | 264.4619728 | 264.456048 | 264.464664 | 264.4517664 |
| 11/3/2013 17:30 | 0 | 264.465816  | 264.4599728 | 264.456048 | 264.461664 | 264.4507664 |
| 11/3/2013 17:40 | 0 | 264.4649016 | 264.4589728 | 264.453048 | 264.461664 | 264.4517664 |
| 11/3/2013 17:50 | 0 | 264.4639872 | 264.4589728 | 264.454048 | 264.462664 | 264.4507664 |
| 11/3/2013 18:00 | 0 | 264.4636824 | 264.4579728 | 264.454048 | 264.464664 | 264.4507664 |
| 11/3/2013 18:10 | 0 | 264.4630728 | 264.4569728 | 264.453048 | 264.463664 | 264.4507664 |
| 11/3/2013 18:20 | 0 | 264.462768  | 264.4569728 | 264.452048 | 264.464664 | 264.4507664 |
| 11/3/2013 18:30 | 0 | 264.4621584 | 264.4549728 | 264.452048 | 264.462664 | 264.4497664 |
| 11/3/2013 18:40 | 0 | 264.4618536 | 264.4559728 | 264.452048 | 264.465664 | 264.4497664 |
| 11/3/2013 18:50 | 0 | 264.4621584 | 264.4569728 | 264.450048 | 264.462664 | 264.4477664 |
| 11/3/2013 19:00 | 0 | 264.4621584 | 264.4549728 | 264.449048 | 264.460664 | 264.4487664 |
| 11/3/2013 19:10 | 0 | 264.4621584 | 264.4569728 | 264.450048 | 264.462664 | 264.4497664 |
| 11/3/2013 19:20 | 0 | 264.4621584 | 264.4579728 | 264.452048 | 264.461664 | 264.4507664 |
| 11/3/2013 19:30 | 0 | 264.4621584 | 264.4589728 | 264.453048 | 264.463664 | 264.4527664 |
| 11/3/2013 19:40 | 0 | 264.4624632 | 264.4569728 | 264.450048 | 264.462664 | 264.4497664 |
| 11/3/2013 19:50 | 0 | 264.4624632 | 264.4559728 | 264.452048 | 264.460664 | 264.4497664 |
| 11/3/2013 20:00 | 0 | 264.4624632 | 264.4579728 | 264.452048 | 264.459664 | 264.4487664 |
| 11/3/2013 20:10 | 0 | 264.462768  | 264.4589728 | 264.451048 | 264.461664 | 264.4487664 |
| 11/3/2013 20:20 | 0 | 264.462768  | 264.4569728 | 264.452048 | 264.461664 | 264.4507664 |
| 11/3/2013 20:30 | 0 | 264.4624632 | 264.4579728 | 264.452048 | 264.461664 | 264.4487664 |
| 11/3/2013 20:40 | 0 | 264.4621584 | 264.4579728 | 264.452048 | 264.460664 | 264.4457664 |
| 11/3/2013 20:50 | 0 | 264.4624632 | 264.4579728 | 264.452048 | 264.458664 | 264.4497664 |
| 11/3/2013 21:00 | 0 | 264.4630728 | 264.4609728 | 264.453048 | 264.461664 | 264.4507664 |
| 11/3/2013 21:10 | 0 | 264.4636824 | 264.4619728 | 264.455048 | 264.461664 | 264.4517664 |
| 11/3/2013 21:20 | 0 | 264.4645968 | 264.4619728 | 264.453048 | 264.461664 | 264.4507664 |
| 11/3/2013 21:30 | 0 | 264.4652064 | 264.4609728 | 264.456048 | 264.459664 | 264.4487664 |
| 11/3/2013 21:40 | 0 | 264.465816  | 264.4639728 | 264.456048 | 264.464664 | 264.4497664 |
| 11/3/2013 21:50 | 0 | 264.4661208 | 264.4629728 | 264.457048 | 264.460664 | 264.4507664 |
| 11/3/2013 22:00 | 0 | 264.4661208 | 264.4649728 | 264.458048 | 264.460664 | 264.4517664 |
| 11/3/2013 22:10 | 0 | 264.4667304 | 264.4649728 | 264.460048 | 264.461664 | 264.4507664 |
| 11/3/2013 22:20 | 0 | 264.46734   | 264.4649728 | 264.457048 | 264.461664 | 264.4517664 |



|                 |        |             |             |            |            |             |
|-----------------|--------|-------------|-------------|------------|------------|-------------|
| 11/3/2013 22:30 | 0      | 264.4670352 | 264.4639728 | 264.457048 | 264.459664 | 264.4507664 |
| 11/3/2013 22:40 | 0      | 264.46734   | 264.4619728 | 264.456048 | 264.460664 | 264.4507664 |
| 11/3/2013 22:50 | 0      | 264.46734   | 264.4629728 | 264.458048 | 264.460664 | 264.4537664 |
| 11/3/2013 23:00 | 0      | 264.4670352 | 264.4629728 | 264.460048 | 264.460664 | 264.4517664 |
| 11/3/2013 23:10 | 0      | 264.4664256 | 264.4629728 | 264.460048 | 264.463664 | 264.4537664 |
| 11/3/2013 23:20 | 0      | 264.4661208 | 264.4579728 | 264.457048 | 264.458664 | 264.4507664 |
| 11/3/2013 23:30 | 0      | 264.4655112 | 264.4589728 | 264.457048 | 264.458664 | 264.4507664 |
| 11/3/2013 23:40 | 0      | 264.4645968 | 264.4549728 | 264.453048 | 264.459664 | 264.4467664 |
| 11/3/2013 23:50 | 0      | 264.4636824 | 264.4549728 | 264.455048 | 264.458664 | 264.4497664 |
| 11/4/2013 0:00  | 0      | 264.462768  | 264.4529728 | 264.450048 | 264.456664 | 264.4457664 |
| 11/4/2013 0:10  | 0      | 264.4618536 | 264.4529728 | 264.450048 | 264.460664 | 264.4477664 |
| 11/4/2013 0:20  | 0      | 264.4606344 | 264.4509728 | 264.450048 | 264.460664 | 264.4477664 |
| 11/4/2013 0:30  | 0      | 264.4594152 | 264.4489728 | 264.448048 | 264.459664 | 264.4477664 |
| 11/4/2013 0:40  | 0      | 264.4575864 | 264.4489728 | 264.449048 | 264.461664 | 264.4487664 |
| 11/4/2013 0:50  | 0      | 264.4560624 | 264.4429728 | 264.444048 | 264.460664 | 264.4427664 |
| 11/4/2013 1:00  | 0      | 264.4542336 | 264.4409728 | 264.444048 | 264.461664 | 264.4427664 |
| 11/4/2013 1:10  | 0      | 264.4524048 | 264.4399728 | 264.441048 | 264.459664 | 264.4427664 |
| 11/4/2013 1:20  | 0      | 264.4508808 | 264.4349728 | 264.437048 | 264.459664 | 264.4387664 |
| 11/4/2013 1:30  | 0      | 264.4487472 | 264.4349728 | 264.434048 | 264.458664 | 264.4367664 |
| 11/4/2013 1:40  | 0      | 264.4472232 | 264.4329728 | 264.434048 | 264.459664 | 264.4367664 |
| 11/4/2013 1:50  | 0      | 264.4456992 | 264.4289728 | 264.429048 | 264.455664 | 264.4347664 |
| 11/4/2013 2:00  | 0      | 264.4432608 | 264.4279728 | 264.428048 | 264.458664 | 264.4337664 |
| 11/4/2013 2:10  | 0      | 264.4426512 | 264.4159728 | 264.425048 | 264.456664 | 264.4297664 |
| 11/4/2013 2:20  | 0      | 264.4386888 | 264.4279728 | 264.422048 | 264.457664 | 264.4317664 |
| 11/4/2013 2:30  | 0      | 264.4389936 | 264.4099728 | 264.418048 | 264.456664 | 264.4257664 |
| 11/4/2013 2:40  | 0      | 264.4350312 | 264.4179728 | 264.417048 | 264.458664 | 264.4287664 |
| 11/4/2013 2:50  | 0      | 264.432288  | 264.4119728 | 264.412048 | 264.456664 | 264.4257664 |
| 11/4/2013 3:00  | 0      | 264.4325928 | 264.4039728 | 264.413048 | 264.461664 | 264.4247664 |
| 11/4/2013 3:10  | 0      | 264.42924   | 264.4119728 | 264.407048 | 264.458664 | 264.4237664 |
| 11/4/2013 3:20  | 0      | 264.427716  | 264.4019728 | 264.405048 | 264.458664 | 264.4207664 |
| 11/4/2013 3:30  | 0      | 264.426192  | 264.4019728 | 264.403048 | 264.456664 | 264.4207664 |
| 11/4/2013 3:40  | 0      | 264.4249728 | 264.4079728 | 264.404048 | 264.459664 | 264.4217664 |
| 11/4/2013 3:50  | 0      | 264.423144  | 264.4089728 | 264.400048 | 264.456664 | 264.4167664 |
| 11/4/2013 4:00  | 0      | 264.4240584 | 264.4069728 | 264.402048 | 264.457664 | 264.4187664 |
| 11/4/2013 4:10  | 0      | 264.4249728 | 264.4029728 | 264.405048 | 264.458664 | 264.4177664 |
| 11/4/2013 4:20  | 0      | 264.423144  | 264.4079728 | 264.404048 | 264.458664 | 264.4177664 |
| 11/4/2013 4:30  | 0      | 264.4213152 | 264.4059728 | 264.402048 | 264.457664 | 264.4167664 |
| 11/4/2013 4:40  | 0      | 264.42162   | 264.3989728 | 264.400048 | 264.454664 | 264.4147664 |
| 11/4/2013 4:50  | 0.0254 | 264.4207056 | 264.3969728 | 264.401048 | 264.455664 | 264.4147664 |
| 11/4/2013 5:00  | 0.0254 | 264.4191816 | 264.4039728 | 264.400048 | 264.455664 | 264.4147664 |
| 11/4/2013 5:10  | 0.0254 | 264.4176576 | 264.4009728 | 264.396048 | 264.454664 | 264.4137664 |
| 11/4/2013 5:20  | 0.0508 | 264.417048  | 264.3979728 | 264.396048 | 264.453664 | 264.4107664 |
| 11/4/2013 5:30  | 0.0762 | 264.417048  | 264.4009728 | 264.396048 | 264.456664 | 264.4137664 |
| 11/4/2013 5:40  | 0.1016 | 264.4164384 | 264.4029728 | 264.396048 | 264.455664 | 264.4127664 |
| 11/4/2013 5:50  | 0.127  | 264.4164384 | 264.3979728 | 264.394048 | 264.453664 | 264.4097664 |
| 11/4/2013 6:00  | 0.1778 | 264.4161336 | 264.3939728 | 264.393048 | 264.455664 | 264.4097664 |
| 11/4/2013 6:10  | 0.2032 | 264.415524  | 264.3979728 | 264.396048 | 264.455664 | 264.4107664 |

|                 |        |             |             |            |            |             |
|-----------------|--------|-------------|-------------|------------|------------|-------------|
| 11/4/2013 6:20  | 0.2032 | 264.4149144 | 264.4029728 | 264.394048 | 264.455664 | 264.4107664 |
| 11/4/2013 6:30  | 0.2032 | 264.4164384 | 264.3979728 | 264.393048 | 264.453664 | 264.4077664 |
| 11/4/2013 6:40  | 0.2032 | 264.4161336 | 264.4029728 | 264.398048 | 264.453664 | 264.4127664 |
| 11/4/2013 6:50  | 0.2032 | 264.417048  | 264.4029728 | 264.396048 | 264.452664 | 264.4107664 |
| 11/4/2013 7:00  | 0.2032 | 264.417048  | 264.4029728 | 264.397048 | 264.451664 | 264.4127664 |
| 11/4/2013 7:10  | 0.2032 | 264.4167432 | 264.3999728 | 264.396048 | 264.451664 | 264.4097664 |
| 11/4/2013 7:20  | 0.2032 | 264.4179624 | 264.4029728 | 264.398048 | 264.453664 | 264.4107664 |
| 11/4/2013 7:30  | 0.2032 | 264.4167432 | 264.4029728 | 264.398048 | 264.451664 | 264.4097664 |
| 11/4/2013 7:40  | 0.2032 | 264.4188768 | 264.4019728 | 264.398048 | 264.451664 | 264.4097664 |
| 11/4/2013 7:50  | 0.2032 | 264.4188768 | 264.4079728 | 264.400048 | 264.451664 | 264.4127664 |
| 11/4/2013 8:00  | 0.2032 | 264.4204008 | 264.4149728 | 264.401048 | 264.450664 | 264.4127664 |
| 11/4/2013 8:10  | 0.2032 | 264.4222296 | 264.4149728 | 264.405048 | 264.453664 | 264.4147664 |
| 11/4/2013 8:20  | 0.2032 | 264.4243632 | 264.4199728 | 264.408048 | 264.453664 | 264.4127664 |
| 11/4/2013 8:30  | 0.2032 | 264.4280208 | 264.4229728 | 264.412048 | 264.452664 | 264.4177664 |
| 11/4/2013 8:40  | 0.2032 | 264.4298496 | 264.4329728 | 264.417048 | 264.450664 | 264.4217664 |
| 11/4/2013 8:50  | 0.2032 | 264.4328976 | 264.4349728 | 264.421048 | 264.451664 | 264.4217664 |
| 11/4/2013 9:00  | 0.2032 | 264.4374696 | 264.4429728 | 264.427048 | 264.453664 | 264.4257664 |
| 11/4/2013 9:10  | 0.2032 | 264.4405176 | 264.4529728 | 264.433048 | 264.450664 | 264.4297664 |
| 11/4/2013 9:20  | 0.2032 | 264.4463088 | 264.4519728 | 264.439048 | 264.452664 | 264.4297664 |
| 11/4/2013 9:30  | 0.2032 | 264.4493568 | 264.4649728 | 264.445048 | 264.452664 | 264.4357664 |
| 11/4/2013 9:40  | 0.2032 | 264.4539288 | 264.4619728 | 264.448048 | 264.450664 | 264.4367664 |
| 11/4/2013 9:50  | 0.2032 | 264.4563672 | 264.4689728 | 264.455048 | 264.452664 | 264.4387664 |
| 11/4/2013 10:00 | 0.2032 | 264.4603296 | 264.4719728 | 264.459048 | 264.450664 | 264.4417664 |
| 11/4/2013 10:10 | 0.2032 | 264.4624632 | 264.4829728 | 264.464048 | 264.452664 | 264.4467664 |
| 11/4/2013 10:20 | 0.2032 | 264.4667304 | 264.4809728 | 264.467048 | 264.450664 | 264.4477664 |
| 11/4/2013 10:30 | 0.2032 | 264.4709976 | 264.4889728 | 264.475048 | 264.451664 | 264.4507664 |
| 11/4/2013 10:40 | 0.2032 | 264.4740456 | 264.4919728 | 264.478048 | 264.454664 | 264.4537664 |
| 11/4/2013 10:50 | 0.2032 | 264.4770936 | 264.4909728 | 264.482048 | 264.454664 | 264.4557664 |
| 11/4/2013 11:00 | 0.2032 | 264.4786176 | 264.4929728 | 264.484048 | 264.452664 | 264.4587664 |
| 11/4/2013 11:10 | 0.2032 | 264.479532  | 264.4919728 | 264.484048 | 264.450664 | 264.4567664 |
| 11/4/2013 11:20 | 0.2032 | 264.4807512 | 264.4889728 | 264.483048 | 264.449664 | 264.4557664 |
| 11/4/2013 11:30 | 0.2032 | 264.4807512 | 264.4869728 | 264.484048 | 264.454664 | 264.4577664 |
| 11/4/2013 11:40 | 0.2032 | 264.4801416 | 264.4849728 | 264.481048 | 264.453664 | 264.4557664 |
| 11/4/2013 11:50 | 0.2032 | 264.4804464 | 264.4849728 | 264.483048 | 264.453664 | 264.4597664 |
| 11/4/2013 12:00 | 0.2032 | 264.4801416 | 264.4849728 | 264.480048 | 264.453664 | 264.4577664 |
| 11/4/2013 12:10 | 0.2032 | 264.4801416 | 264.4809728 | 264.479048 | 264.453664 | 264.4567664 |
| 11/4/2013 12:20 | 0.2032 | 264.4792272 | 264.4779728 | 264.479048 | 264.453664 | 264.4577664 |
| 11/4/2013 12:30 | 0.2032 | 264.4773984 | 264.4739728 | 264.475048 | 264.453664 | 264.4567664 |
| 11/4/2013 12:40 | 0.2032 | 264.4755696 | 264.4719728 | 264.475048 | 264.453664 | 264.4557664 |
| 11/4/2013 12:50 | 0.2032 | 264.473436  | 264.4679728 | 264.469048 | 264.452664 | 264.4507664 |
| 11/4/2013 13:00 | 0.2032 | 264.4713024 | 264.4639728 | 264.467048 | 264.452664 | 264.4507664 |
| 11/4/2013 13:10 | 0.2032 | 264.4694736 | 264.4569728 | 264.460048 | 264.450664 | 264.4477664 |
| 11/4/2013 13:20 | 0.2032 | 264.4667304 | 264.4659728 | 264.461048 | 264.451664 | 264.4507664 |
| 11/4/2013 13:30 | 0.2032 | 264.4670352 | 264.4609728 | 264.458048 | 264.452664 | 264.4497664 |
| 11/4/2013 13:40 | 0.2032 | 264.4655112 | 264.4599728 | 264.457048 | 264.450664 | 264.4477664 |
| 11/4/2013 13:50 | 0.2032 | 264.4639872 | 264.4579728 | 264.454048 | 264.450664 | 264.4477664 |
| 11/4/2013 14:00 | 0.2032 | 264.464292  | 264.4579728 | 264.457048 | 264.452664 | 264.4477664 |

|                 |        |             |             |            |            |             |
|-----------------|--------|-------------|-------------|------------|------------|-------------|
| 11/4/2013 14:10 | 0.2032 | 264.4636824 | 264.4599728 | 264.457048 | 264.453664 | 264.4507664 |
| 11/4/2013 14:20 | 0.2032 | 264.4630728 | 264.4579728 | 264.456048 | 264.452664 | 264.4497664 |
| 11/4/2013 14:30 | 0.2032 | 264.4624632 | 264.4569728 | 264.452048 | 264.452664 | 264.4467664 |
| 11/4/2013 14:40 | 0.2032 | 264.4618536 | 264.4529728 | 264.453048 | 264.454664 | 264.4467664 |
| 11/4/2013 14:50 | 0.2032 | 264.461244  | 264.4549728 | 264.453048 | 264.454664 | 264.4477664 |
| 11/4/2013 15:00 | 0.2032 | 264.4600248 | 264.4469728 | 264.452048 | 264.452664 | 264.4437664 |
| 11/4/2013 15:10 | 0.2032 | 264.4578912 | 264.4539728 | 264.449048 | 264.453664 | 264.4457664 |
| 11/4/2013 15:20 | 0.2032 | 264.4588056 | 264.4519728 | 264.449048 | 264.453664 | 264.4457664 |
| 11/4/2013 15:30 | 0.2032 | 264.4578912 | 264.4459728 | 264.446048 | 264.453664 | 264.4417664 |
| 11/4/2013 15:40 | 0.2032 | 264.455148  | 264.4489728 | 264.445048 | 264.450664 | 264.4437664 |
| 11/4/2013 15:50 | 0.2032 | 264.4560624 | 264.4529728 | 264.445048 | 264.453664 | 264.4437664 |
| 11/4/2013 16:00 | 0.2032 | 264.4563672 | 264.4409728 | 264.444048 | 264.452664 | 264.4407664 |
| 11/4/2013 16:10 | 0.2032 | 264.4527096 | 264.4499728 | 264.442048 | 264.450664 | 264.4427664 |
| 11/4/2013 16:20 | 0.2032 | 264.4545384 | 264.4479728 | 264.445048 | 264.453664 | 264.4417664 |
| 11/4/2013 16:30 | 0.2032 | 264.4539288 | 264.4369728 | 264.442048 | 264.453664 | 264.4387664 |
| 11/4/2013 16:40 | 0.2032 | 264.4511856 | 264.4509728 | 264.442048 | 264.453664 | 264.4437664 |
| 11/4/2013 16:50 | 0.2032 | 264.4524048 | 264.4379728 | 264.439048 | 264.451664 | 264.4377664 |
| 11/4/2013 17:00 | 0.2032 | 264.4511856 | 264.4459728 | 264.441048 | 264.452664 | 264.4417664 |
| 11/4/2013 17:10 | 0.2032 | 264.450576  | 264.4349728 | 264.438048 | 264.451664 | 264.4377664 |
| 11/4/2013 17:20 | 0.2032 | 264.449052  | 264.4499728 | 264.436048 | 264.451664 | 264.4417664 |
| 11/4/2013 17:30 | 0.2032 | 264.4514904 | 264.4369728 | 264.438048 | 264.451664 | 264.4377664 |
| 11/4/2013 17:40 | 0.2032 | 264.449052  | 264.4479728 | 264.439048 | 264.452664 | 264.4387664 |
| 11/4/2013 17:50 | 0.2032 | 264.4514904 | 264.4419728 | 264.440048 | 264.453664 | 264.4387664 |
| 11/4/2013 18:00 | 0.2032 | 264.4487472 | 264.4509728 | 264.438048 | 264.451664 | 264.4397664 |
| 11/4/2013 18:10 | 0.2032 | 264.4533192 | 264.4519728 | 264.443048 | 264.453664 | 264.4417664 |
| 11/4/2013 18:20 | 0.2032 | 264.4517952 | 264.4399728 | 264.439048 | 264.450664 | 264.4357664 |
| 11/4/2013 18:30 | 0.2032 | 264.4511856 | 264.4529728 | 264.441048 | 264.450664 | 264.4407664 |
| 11/4/2013 18:40 | 0.2032 | 264.4533192 | 264.4389728 | 264.441048 | 264.452664 | 264.4357664 |
| 11/4/2013 18:50 | 0.2032 | 264.4496616 | 264.4519728 | 264.440048 | 264.450664 | 264.4377664 |
| 11/4/2013 19:00 | 0.2032 | 264.4530144 | 264.4409728 | 264.441048 | 264.450664 | 264.4367664 |
| 11/4/2013 19:10 | 0.2032 | 264.450576  | 264.4529728 | 264.441048 | 264.450664 | 264.4387664 |
| 11/4/2013 19:20 | 0.2032 | 264.4539288 | 264.4529728 | 264.444048 | 264.449664 | 264.4387664 |
| 11/4/2013 19:30 | 0.2032 | 264.4524048 | 264.4489728 | 264.442048 | 264.450664 | 264.4377664 |
| 11/4/2013 19:40 | 0.2032 | 264.4545384 | 264.4499728 | 264.444048 | 264.448664 | 264.4397664 |
| 11/4/2013 19:50 | 0.2032 | 264.4533192 | 264.4489728 | 264.444048 | 264.452664 | 264.4377664 |
| 11/4/2013 20:00 | 0.2032 | 264.4548432 | 264.4589728 | 264.445048 | 264.449664 | 264.4407664 |
| 11/4/2013 20:10 | 0.2032 | 264.4578912 | 264.4539728 | 264.448048 | 264.449664 | 264.4407664 |
| 11/4/2013 20:20 | 0.2032 | 264.4560624 | 264.4539728 | 264.448048 | 264.448664 | 264.4427664 |
| 11/4/2013 20:30 | 0.2032 | 264.458196  | 264.4609728 | 264.450048 | 264.449664 | 264.4437664 |
| 11/4/2013 20:40 | 0.2032 | 264.45972   | 264.4529728 | 264.450048 | 264.452664 | 264.4407664 |
| 11/4/2013 20:50 | 0.2032 | 264.4575864 | 264.4609728 | 264.450048 | 264.448664 | 264.4427664 |
| 11/4/2013 21:00 | 0.2032 | 264.461244  | 264.4629728 | 264.454048 | 264.452664 | 264.4447664 |
| 11/4/2013 21:10 | 0.2032 | 264.4621584 | 264.4619728 | 264.454048 | 264.450664 | 264.4437664 |
| 11/4/2013 21:20 | 0.2032 | 264.4624632 | 264.4619728 | 264.454048 | 264.449664 | 264.4467664 |
| 11/4/2013 21:30 | 0.2032 | 264.462768  | 264.4619728 | 264.454048 | 264.448664 | 264.4457664 |
| 11/4/2013 21:40 | 0.2032 | 264.4630728 | 264.4619728 | 264.455048 | 264.448664 | 264.4457664 |
| 11/4/2013 21:50 | 0.2032 | 264.4636824 | 264.4639728 | 264.457048 | 264.448664 | 264.4457664 |

|                 |        |             |             |            |            |             |
|-----------------|--------|-------------|-------------|------------|------------|-------------|
| 11/4/2013 22:00 | 0.2032 | 264.4645968 | 264.4639728 | 264.457048 | 264.448664 | 264.4457664 |
| 11/4/2013 22:10 | 0.2032 | 264.4652064 | 264.4669728 | 264.461048 | 264.450664 | 264.4497664 |
| 11/4/2013 22:20 | 0.2032 | 264.4661208 | 264.4689728 | 264.462048 | 264.450664 | 264.4497664 |
| 11/4/2013 22:30 | 0.2032 | 264.4664256 | 264.4669728 | 264.462048 | 264.452664 | 264.4517664 |
| 11/4/2013 22:40 | 0.2032 | 264.4667304 | 264.4649728 | 264.460048 | 264.448664 | 264.4487664 |
| 11/4/2013 22:50 | 0.2032 | 264.4667304 | 264.4639728 | 264.459048 | 264.448664 | 264.4477664 |
| 11/4/2013 23:00 | 0.2032 | 264.4655112 | 264.4669728 | 264.459048 | 264.449664 | 264.4517664 |
| 11/4/2013 23:10 | 0      | 264.4664256 | 264.4659728 | 264.459048 | 264.451664 | 264.4477664 |
| 11/4/2013 23:20 | 0      | 264.4679496 | 264.4669728 | 264.462048 | 264.448664 | 264.4527664 |
| 11/4/2013 23:30 | 0      | 264.4682544 | 264.4669728 | 264.463048 | 264.448664 | 264.4507664 |
| 11/4/2013 23:40 | 0      | 264.4679496 | 264.4669728 | 264.462048 | 264.450664 | 264.4527664 |
| 11/4/2013 23:50 | 0      | 264.46734   | 264.4639728 | 264.462048 | 264.452664 | 264.4507664 |
| 11/5/2013 0:00  | 0      | 264.4667304 | 264.4639728 | 264.462048 | 264.448664 | 264.4507664 |
| 11/5/2013 0:10  | 0      | 264.4655112 | 264.4619728 | 264.460048 | 264.447664 | 264.4507664 |
| 11/5/2013 0:20  | 0      | 264.4649016 | 264.4579728 | 264.458048 | 264.452664 | 264.4467664 |
| 11/5/2013 0:30  | 0      | 264.4633776 | 264.4589728 | 264.458048 | 264.452664 | 264.4517664 |
| 11/5/2013 0:40  | 0      | 264.4624632 | 264.4559728 | 264.455048 | 264.451664 | 264.4487664 |
| 11/5/2013 0:50  | 0      | 264.4615488 | 264.4509728 | 264.451048 | 264.450664 | 264.4447664 |
| 11/5/2013 1:00  | 0      | 264.4603296 | 264.4479728 | 264.451048 | 264.448664 | 264.4437664 |
| 11/5/2013 1:10  | 0      | 264.4588056 | 264.4499728 | 264.447048 | 264.449664 | 264.4447664 |
| 11/5/2013 1:20  | 0      | 264.4572816 | 264.4479728 | 264.447048 | 264.449664 | 264.4447664 |
| 11/5/2013 1:30  | 0      | 264.4560624 | 264.4479728 | 264.444048 | 264.449664 | 264.4437664 |
| 11/5/2013 1:40  | 0      | 264.4548432 | 264.4469728 | 264.443048 | 264.450664 | 264.4417664 |
| 11/5/2013 1:50  | 0      | 264.453624  | 264.4419728 | 264.440048 | 264.447664 | 264.4407664 |
| 11/5/2013 2:00  | 0      | 264.4517952 | 264.4339728 | 264.436048 | 264.449664 | 264.4377664 |
| 11/5/2013 2:10  | 0      | 264.4493568 | 264.4419728 | 264.437048 | 264.449664 | 264.4397664 |
| 11/5/2013 2:20  | 0      | 264.4487472 | 264.4289728 | 264.435048 | 264.450664 | 264.4377664 |
| 11/5/2013 2:30  | 0      | 264.446004  | 264.4329728 | 264.432048 | 264.449664 | 264.4357664 |
| 11/5/2013 2:40  | 0      | 264.4423464 | 264.4279728 | 264.428048 | 264.450664 | 264.4327664 |
| 11/5/2013 2:50  | 0      | 264.4423464 | 264.4289728 | 264.425048 | 264.449664 | 264.4347664 |
| 11/5/2013 3:00  | 0      | 264.4386888 | 264.4209728 | 264.421048 | 264.449664 | 264.4307664 |
| 11/5/2013 3:10  | 0      | 264.4392984 | 264.4179728 | 264.421048 | 264.447664 | 264.4297664 |
| 11/5/2013 3:20  | 0      | 264.4341168 | 264.4179728 | 264.416048 | 264.447664 | 264.4277664 |
| 11/5/2013 3:30  | 0      | 264.4344216 | 264.4129728 | 264.415048 | 264.447664 | 264.4277664 |
| 11/5/2013 3:40  | 0      | 264.4310688 | 264.4179728 | 264.413048 | 264.447664 | 264.4277664 |
| 11/5/2013 3:50  | 0      | 264.430764  | 264.4119728 | 264.410048 | 264.446664 | 264.4227664 |
| 11/5/2013 4:00  | 0      | 264.4304592 | 264.4129728 | 264.410048 | 264.447664 | 264.4247664 |
| 11/5/2013 4:10  | 0      | 264.427716  | 264.4129728 | 264.409048 | 264.447664 | 264.4217664 |
| 11/5/2013 4:20  | 0      | 264.427716  | 264.4099728 | 264.405048 | 264.447664 | 264.4207664 |
| 11/5/2013 4:30  | 0      | 264.4274112 | 264.4079728 | 264.405048 | 264.449664 | 264.4207664 |
| 11/5/2013 4:40  | 0      | 264.426192  | 264.4089728 | 264.405048 | 264.448664 | 264.4197664 |
| 11/5/2013 4:50  | 0      | 264.4249728 | 264.4099728 | 264.404048 | 264.446664 | 264.4207664 |
| 11/5/2013 5:00  | 0      | 264.4243632 | 264.4039728 | 264.401048 | 264.448664 | 264.4167664 |
| 11/5/2013 5:10  | 0      | 264.4228392 | 264.4139728 | 264.404048 | 264.446664 | 264.4177664 |
| 11/5/2013 5:20  | 0      | 264.423144  | 264.4029728 | 264.401048 | 264.446664 | 264.4167664 |
| 11/5/2013 5:30  | 0      | 264.4225344 | 264.4039728 | 264.401048 | 264.445664 | 264.4167664 |
| 11/5/2013 5:40  | 0      | 264.4210104 | 264.4079728 | 264.403048 | 264.445664 | 264.4147664 |

|                 |        |             |             |            |            |             |
|-----------------|--------|-------------|-------------|------------|------------|-------------|
| 11/5/2013 5:50  | 0      | 264.42162   | 264.4059728 | 264.403048 | 264.446664 | 264.4167664 |
| 11/5/2013 6:00  | 0      | 264.4213152 | 264.4069728 | 264.401048 | 264.444664 | 264.4127664 |
| 11/5/2013 6:10  | 0      | 264.420096  | 264.4119728 | 264.401048 | 264.442664 | 264.4137664 |
| 11/5/2013 6:20  | 0      | 264.4213152 | 264.4049728 | 264.400048 | 264.441664 | 264.4107664 |
| 11/5/2013 6:30  | 0      | 264.4197912 | 264.4099728 | 264.401048 | 264.444664 | 264.4137664 |
| 11/5/2013 6:40  | 0      | 264.420096  | 264.4039728 | 264.402048 | 264.443664 | 264.4127664 |
| 11/5/2013 6:50  | 0      | 264.4188768 | 264.4019728 | 264.397048 | 264.441664 | 264.4097664 |
| 11/5/2013 7:00  | 0      | 264.4182672 | 264.4049728 | 264.400048 | 264.442664 | 264.4107664 |
| 11/5/2013 7:10  | 0      | 264.4182672 | 264.4029728 | 264.399048 | 264.442664 | 264.4117664 |
| 11/5/2013 7:20  | 0      | 264.4179624 | 264.4069728 | 264.401048 | 264.444664 | 264.4127664 |
| 11/5/2013 7:30  | 0      | 264.4179624 | 264.4059728 | 264.401048 | 264.441664 | 264.4117664 |
| 11/5/2013 7:40  | 0      | 264.4197912 | 264.4099728 | 264.401048 | 264.442664 | 264.4117664 |
| 11/5/2013 7:50  | 0      | 264.4197912 | 264.4109728 | 264.404048 | 264.445664 | 264.4157664 |
| 11/5/2013 8:00  | 0      | 264.4204008 | 264.4179728 | 264.405048 | 264.441664 | 264.4157664 |
| 11/5/2013 8:10  | 0      | 264.424668  | 264.4179728 | 264.405048 | 264.441664 | 264.4157664 |
| 11/5/2013 8:20  | 0      | 264.4252776 | 264.4209728 | 264.409048 | 264.441664 | 264.4167664 |
| 11/5/2013 8:30  | 0      | 264.4264968 | 264.4189728 | 264.409048 | 264.441664 | 264.4127664 |
| 11/5/2013 8:40  | 0      | 264.4289352 | 264.4239728 | 264.415048 | 264.439664 | 264.4167664 |
| 11/5/2013 8:50  | 0      | 264.430764  | 264.4339728 | 264.417048 | 264.439664 | 264.4187664 |
| 11/5/2013 9:00  | 0      | 264.433812  | 264.4379728 | 264.420048 | 264.439664 | 264.4227664 |
| 11/5/2013 9:10  | 0      | 264.4389936 | 264.4429728 | 264.428048 | 264.442664 | 264.4267664 |
| 11/5/2013 9:20  | 0      | 264.441432  | 264.4549728 | 264.432048 | 264.440664 | 264.4307664 |
| 11/5/2013 9:30  | 0      | 264.4472232 | 264.4599728 | 264.440048 | 264.439664 | 264.4357664 |
| 11/5/2013 9:40  | 0      | 264.4517952 | 264.4629728 | 264.447048 | 264.441664 | 264.4367664 |
| 11/5/2013 9:50  | 0      | 264.4554528 | 264.4689728 | 264.452048 | 264.440664 | 264.4407664 |
| 11/5/2013 10:00 | 0.0254 | 264.4588056 | 264.4749728 | 264.458048 | 264.438664 | 264.4427664 |
| 11/5/2013 10:10 | 0.0254 | 264.4621584 | 264.4689728 | 264.461048 | 264.438664 | 264.4427664 |
| 11/5/2013 10:20 | 0.0254 | 264.464292  | 264.4759728 | 264.465048 | 264.440664 | 264.4467664 |
| 11/5/2013 10:30 | 0.0254 | 264.4661208 | 264.4789728 | 264.468048 | 264.441664 | 264.4477664 |
| 11/5/2013 10:40 | 0.0254 | 264.468864  | 264.4799728 | 264.470048 | 264.441664 | 264.4487664 |
| 11/5/2013 10:50 | 0.0254 | 264.4691688 | 264.4749728 | 264.470048 | 264.441664 | 264.4487664 |
| 11/5/2013 11:00 | 0.0254 | 264.4679496 | 264.4689728 | 264.468048 | 264.439664 | 264.4467664 |
| 11/5/2013 11:10 | 0.0254 | 264.4679496 | 264.4629728 | 264.465048 | 264.438664 | 264.4447664 |
| 11/5/2013 11:20 | 0.0254 | 264.4667304 | 264.4699728 | 264.465048 | 264.441664 | 264.4477664 |
| 11/5/2013 11:30 | 0.0254 | 264.46734   | 264.4639728 | 264.464048 | 264.439664 | 264.4477664 |
| 11/5/2013 11:40 | 0.0508 | 264.4664256 | 264.4739728 | 264.463048 | 264.440664 | 264.4487664 |
| 11/5/2013 11:50 | 0.0508 | 264.4682544 | 264.4689728 | 264.463048 | 264.440664 | 264.4487664 |
| 11/5/2013 12:00 | 0.0508 | 264.4685592 | 264.4689728 | 264.464048 | 264.440664 | 264.4487664 |
| 11/5/2013 12:10 | 0.0508 | 264.4670352 | 264.4599728 | 264.460048 | 264.440664 | 264.4467664 |
| 11/5/2013 12:20 | 0.0508 | 264.4655112 | 264.4629728 | 264.460048 | 264.440664 | 264.4477664 |
| 11/5/2013 12:30 | 0.0508 | 264.4639872 | 264.4529728 | 264.455048 | 264.440664 | 264.4417664 |
| 11/5/2013 12:40 | 0.0508 | 264.4630728 | 264.4549728 | 264.455048 | 264.440664 | 264.4437664 |
| 11/5/2013 12:50 | 0.0508 | 264.4606344 | 264.4529728 | 264.453048 | 264.441664 | 264.4447664 |
| 11/5/2013 13:00 | 0.0762 | 264.4603296 | 264.4459728 | 264.451048 | 264.440664 | 264.4457664 |
| 11/5/2013 13:10 | 0.1016 | 264.4569768 | 264.4529728 | 264.449048 | 264.441664 | 264.4427664 |
| 11/5/2013 13:20 | 0.127  | 264.456672  | 264.4449728 | 264.444048 | 264.438664 | 264.4407664 |
| 11/5/2013 13:30 | 0.1524 | 264.4560624 | 264.4449728 | 264.445048 | 264.440664 | 264.4417664 |

|                 |        |             |             |            |            |             |
|-----------------|--------|-------------|-------------|------------|------------|-------------|
| 11/5/2013 13:40 | 0.1778 | 264.453624  | 264.4499728 | 264.441048 | 264.438664 | 264.4407664 |
| 11/5/2013 13:50 | 0.2032 | 264.453624  | 264.4409728 | 264.443048 | 264.440664 | 264.4407664 |
| 11/5/2013 14:00 | 0.2032 | 264.4524048 | 264.4419728 | 264.443048 | 264.441664 | 264.4397664 |
| 11/5/2013 14:10 | 0.2032 | 264.450576  | 264.4449728 | 264.440048 | 264.440664 | 264.4397664 |
| 11/5/2013 14:20 | 0.2286 | 264.4514904 | 264.4429728 | 264.440048 | 264.440664 | 264.4407664 |
| 11/5/2013 14:30 | 0.2286 | 264.4521    | 264.4469728 | 264.440048 | 264.441664 | 264.4407664 |
| 11/5/2013 14:40 | 0.254  | 264.4533192 | 264.4499728 | 264.440048 | 264.441664 | 264.4427664 |
| 11/5/2013 14:50 | 0.254  | 264.4530144 | 264.4499728 | 264.442048 | 264.441664 | 264.4417664 |
| 11/5/2013 15:00 | 0.3048 | 264.4545384 | 264.4409728 | 264.442048 | 264.437664 | 264.4377664 |
| 11/5/2013 15:10 | 0.3556 | 264.4530144 | 264.4529728 | 264.442048 | 264.438664 | 264.4417664 |
| 11/5/2013 15:20 | 0.381  | 264.4527096 | 264.4469728 | 264.441048 | 264.439664 | 264.4397664 |
| 11/5/2013 15:30 | 0.4064 | 264.453624  | 264.4469728 | 264.444048 | 264.439664 | 264.4417664 |
| 11/5/2013 15:40 | 0.4826 | 264.4517952 | 264.4519728 | 264.442048 | 264.439664 | 264.4437664 |
| 11/5/2013 15:50 | 0.5334 | 264.4533192 | 264.4439728 | 264.441048 | 264.441664 | 264.4417664 |
| 11/5/2013 16:00 | 0.5334 | 264.4524048 | 264.4479728 | 264.442048 | 264.442664 | 264.4417664 |
| 11/5/2013 16:10 | 0.5842 | 264.4514904 | 264.4479728 | 264.441048 | 264.441664 | 264.4417664 |
| 11/5/2013 16:20 | 0.6096 | 264.4539288 | 264.4429728 | 264.441048 | 264.442664 | 264.4397664 |
| 11/5/2013 16:30 | 0.6096 | 264.4524048 | 264.4499728 | 264.441048 | 264.440664 | 264.4407664 |
| 11/5/2013 16:40 | 0.6096 | 264.4521    | 264.4489728 | 264.441048 | 264.441664 | 264.4407664 |
| 11/5/2013 16:50 | 0.6096 | 264.4554528 | 264.4459728 | 264.441048 | 264.438664 | 264.4397664 |
| 11/5/2013 17:00 | 0.6096 | 264.4560624 | 264.4639728 | 264.445048 | 264.437664 | 264.4437664 |
| 11/5/2013 17:10 | 0.635  | 264.4624632 | 264.4679728 | 264.452048 | 264.441664 | 264.4467664 |
| 11/5/2013 17:20 | 0.6604 | 264.4676448 | 264.4909728 | 264.462048 | 264.442664 | 264.4567664 |
| 11/5/2013 17:30 | 0.6858 | 264.4743504 | 264.4969728 | 264.470048 | 264.440664 | 264.4597664 |
| 11/5/2013 17:40 | 0.7366 | 264.4819704 | 264.5019728 | 264.480048 | 264.438664 | 264.4617664 |
| 11/5/2013 17:50 | 0.8128 | 264.4877616 | 264.5179728 | 264.490048 | 264.441664 | 264.4677664 |
| 11/5/2013 18:00 | 0.889  | 264.4956864 | 264.5249728 | 264.502048 | 264.442664 | 264.4737664 |
| 11/5/2013 18:10 | 0.9144 | 264.5026968 | 264.5399728 | 264.510048 | 264.441664 | 264.4777664 |
| 11/5/2013 18:20 | 0.9144 | 264.5106216 | 264.5479728 | 264.523048 | 264.442664 | 264.4857664 |
| 11/5/2013 18:30 | 0.9398 | 264.519156  | 264.5529728 | 264.531048 | 264.443664 | 264.4907664 |
| 11/5/2013 18:40 | 0.9398 | 264.5255568 | 264.5619728 | 264.540048 | 264.443664 | 264.4957664 |
| 11/5/2013 18:50 | 0.9398 | 264.5310432 | 264.5619728 | 264.548048 | 264.444664 | 264.4987664 |
| 11/5/2013 19:00 | 0.9652 | 264.53592   | 264.5659728 | 264.554048 | 264.445664 | 264.5037664 |
| 11/5/2013 19:10 | 0.9652 | 264.5377488 | 264.5629728 | 264.552048 | 264.445664 | 264.5017664 |
| 11/5/2013 19:20 | 0.9652 | 264.5407968 | 264.5609728 | 264.555048 | 264.445664 | 264.5017664 |
| 11/5/2013 19:30 | 0.9652 | 264.5407968 | 264.5549728 | 264.554048 | 264.447664 | 264.5017664 |
| 11/5/2013 19:40 | 0.9906 | 264.5417112 | 264.5569728 | 264.552048 | 264.446664 | 264.5037664 |
| 11/5/2013 19:50 | 0.9906 | 264.542016  | 264.5499728 | 264.551048 | 264.446664 | 264.5017664 |
| 11/5/2013 20:00 | 0.9906 | 264.542016  | 264.5549728 | 264.551048 | 264.448664 | 264.5067664 |
| 11/5/2013 20:10 | 0.9906 | 264.5429304 | 264.5609728 | 264.548048 | 264.447664 | 264.5087664 |
| 11/5/2013 20:20 | 0.9906 | 264.5502456 | 264.5799728 | 264.558048 | 264.448664 | 264.5127664 |
| 11/5/2013 20:30 | 0.9906 | 264.5606088 | 264.6069728 | 264.571048 | 264.450664 | 264.5247664 |
| 11/5/2013 20:40 | 0.9906 | 264.5728008 | 264.6289728 | 264.586048 | 264.449664 | 264.5347664 |
| 11/5/2013 20:50 | 0.9906 | 264.5859072 | 264.6389728 | 264.602048 | 264.449664 | 264.5397664 |
| 11/5/2013 21:00 | 1.016  | 264.5956608 | 264.6429728 | 264.615048 | 264.451664 | 264.5457664 |
| 11/5/2013 21:10 | 1.016  | 264.6023664 | 264.6509728 | 264.625048 | 264.452664 | 264.5487664 |
| 11/5/2013 21:20 | 1.016  | 264.6078528 | 264.6479728 | 264.633048 | 264.452664 | 264.5517664 |

|                 |        |             |             |            |            |             |
|-----------------|--------|-------------|-------------|------------|------------|-------------|
| 11/5/2013 21:30 | 1.0414 | 264.6118152 | 264.6489728 | 264.637048 | 264.452664 | 264.5537664 |
| 11/5/2013 21:40 | 1.0414 | 264.6133392 | 264.6459728 | 264.638048 | 264.455664 | 264.5537664 |
| 11/5/2013 21:50 | 1.0668 | 264.6148632 | 264.6439728 | 264.638048 | 264.457664 | 264.5547664 |
| 11/5/2013 22:00 | 1.0668 | 264.6163872 | 264.6499728 | 264.640048 | 264.458664 | 264.5597664 |
| 11/5/2013 22:10 | 1.0922 | 264.6191304 | 264.6539728 | 264.642048 | 264.459664 | 264.5617664 |
| 11/5/2013 22:20 | 1.143  | 264.6221784 | 264.6539728 | 264.642048 | 264.459664 | 264.5617664 |
| 11/5/2013 22:30 | 1.2192 | 264.6246168 | 264.6559728 | 264.646048 | 264.462664 | 264.5667664 |
| 11/5/2013 22:40 | 1.2954 | 264.6270552 | 264.6589728 | 264.646048 | 264.461664 | 264.5657664 |
| 11/5/2013 22:50 | 1.3208 | 264.6294936 | 264.6599728 | 264.650048 | 264.463664 | 264.5677664 |
| 11/5/2013 23:00 | 1.3716 | 264.6310176 | 264.6599728 | 264.653048 | 264.464664 | 264.5717664 |
| 11/5/2013 23:10 | 0      | 264.6313224 | 264.6579728 | 264.652048 | 264.464664 | 264.5707664 |
| 11/5/2013 23:20 | 0      | 264.6310176 | 264.6539728 | 264.651048 | 264.465664 | 264.5707664 |
| 11/5/2013 23:30 | 0      | 264.6322368 | 264.6539728 | 264.649048 | 264.466664 | 264.5717664 |
| 11/5/2013 23:40 | 0      | 264.631932  | 264.6559728 | 264.649048 | 264.469664 | 264.5747664 |
| 11/5/2013 23:50 | 0      | 264.6322368 | 264.6529728 | 264.649048 | 264.469664 | 264.5747664 |
| 11/6/2013 0:00  | 0      | 264.631932  | 264.6479728 | 264.645048 | 264.470664 | 264.5737664 |
| 11/6/2013 0:10  | 0      | 264.6310176 | 264.6479728 | 264.645048 | 264.470664 | 264.5737664 |
| 11/6/2013 0:20  | 0      | 264.6307128 | 264.6479728 | 264.645048 | 264.473664 | 264.5747664 |
| 11/6/2013 0:30  | 0      | 264.6313224 | 264.6519728 | 264.644048 | 264.472664 | 264.5737664 |
| 11/6/2013 0:40  | 0      | 264.6337608 | 264.6569728 | 264.644048 | 264.474664 | 264.5777664 |
| 11/6/2013 0:50  | 0      | 264.6404664 | 264.6689728 | 264.650048 | 264.475664 | 264.5837664 |
| 11/6/2013 1:00  | 0      | 264.6483912 | 264.6819728 | 264.656048 | 264.477664 | 264.5857664 |
| 11/6/2013 1:10  | 0      | 264.65784   | 264.6969728 | 264.668048 | 264.478664 | 264.5947664 |
| 11/6/2013 1:20  | 0      | 264.6651552 | 264.7029728 | 264.676048 | 264.480664 | 264.5987664 |
| 11/6/2013 1:30  | 0      | 264.6706416 | 264.7089728 | 264.686048 | 264.481664 | 264.6027664 |
| 11/6/2013 1:40  | 0      | 264.6727752 | 264.7059728 | 264.689048 | 264.479664 | 264.6037664 |
| 11/6/2013 1:50  | 0      | 264.6749088 | 264.7049728 | 264.693048 | 264.483664 | 264.6057664 |
| 11/6/2013 2:00  | 0      | 264.67308   | 264.7009728 | 264.694048 | 264.484664 | 264.6047664 |
| 11/6/2013 2:10  | 0      | 264.6739944 | 264.6989728 | 264.693048 | 264.484664 | 264.6067664 |
| 11/6/2013 2:20  | 0      | 264.6712512 | 264.6969728 | 264.691048 | 264.487664 | 264.6057664 |
| 11/6/2013 2:30  | 0      | 264.6721656 | 264.6949728 | 264.691048 | 264.489664 | 264.6067664 |
| 11/6/2013 2:40  | 0      | 264.6733848 | 264.6959728 | 264.688048 | 264.489664 | 264.6057664 |
| 11/6/2013 2:50  | 0      | 264.6736896 | 264.6999728 | 264.691048 | 264.491664 | 264.6097664 |
| 11/6/2013 3:00  | 0      | 264.676128  | 264.7049728 | 264.694048 | 264.492664 | 264.6127664 |
| 11/6/2013 3:10  | 0      | 264.6785664 | 264.7069728 | 264.693048 | 264.494664 | 264.6137664 |
| 11/6/2013 3:20  | 0      | 264.6825288 | 264.7069728 | 264.697048 | 264.496664 | 264.6157664 |
| 11/6/2013 3:30  | 0      | 264.6843576 | 264.7089728 | 264.699048 | 264.496664 | 264.6177664 |
| 11/6/2013 3:40  | 0      | 264.6849672 | 264.7089728 | 264.700048 | 264.495664 | 264.6167664 |
| 11/6/2013 3:50  | 0      | 264.6846624 | 264.7119728 | 264.701048 | 264.500664 | 264.6177664 |
| 11/6/2013 4:00  | 0      | 264.686796  | 264.7079728 | 264.702048 | 264.500664 | 264.6197664 |
| 11/6/2013 4:10  | 0      | 264.6855768 | 264.7059728 | 264.702048 | 264.503664 | 264.6197664 |
| 11/6/2013 4:20  | 0      | 264.6834432 | 264.7009728 | 264.698048 | 264.501664 | 264.6197664 |
| 11/6/2013 4:30  | 0      | 264.682224  | 264.6969728 | 264.695048 | 264.503664 | 264.6157664 |
| 11/6/2013 4:40  | 0      | 264.6807    | 264.6899728 | 264.692048 | 264.503664 | 264.6157664 |
| 11/6/2013 4:50  | 0.0254 | 264.677652  | 264.6899728 | 264.690048 | 264.501664 | 264.6147664 |
| 11/6/2013 5:00  | 0.0254 | 264.6758232 | 264.6859728 | 264.687048 | 264.506664 | 264.6137664 |
| 11/6/2013 5:10  | 0.0254 | 264.67308   | 264.6799728 | 264.683048 | 264.507664 | 264.6137664 |

|                 |        |             |             |            |            |             |
|-----------------|--------|-------------|-------------|------------|------------|-------------|
| 11/6/2013 5:20  | 0.0254 | 264.671556  | 264.6779728 | 264.680048 | 264.510664 | 264.6127664 |
| 11/6/2013 5:30  | 0.0254 | 264.6697272 | 264.6759728 | 264.679048 | 264.508664 | 264.6147664 |
| 11/6/2013 5:40  | 0.0254 | 264.666984  | 264.6719728 | 264.673048 | 264.509664 | 264.6077664 |
| 11/6/2013 5:50  | 0.0254 | 264.666984  | 264.6689728 | 264.670048 | 264.510664 | 264.6067664 |
| 11/6/2013 6:00  | 0.0254 | 264.6630216 | 264.6669728 | 264.666048 | 264.510664 | 264.6047664 |
| 11/6/2013 6:10  | 0.0254 | 264.6605832 | 264.6629728 | 264.661048 | 264.514664 | 264.6047664 |
| 11/6/2013 6:20  | 0.0254 | 264.659364  | 264.6599728 | 264.660048 | 264.512664 | 264.6047664 |
| 11/6/2013 6:30  | 0.0254 | 264.6575352 | 264.6579728 | 264.659048 | 264.515664 | 264.6057664 |
| 11/6/2013 6:40  | 0.0254 | 264.656316  | 264.6549728 | 264.657048 | 264.514664 | 264.6057664 |
| 11/6/2013 6:50  | 0.0254 | 264.6544872 | 264.6519728 | 264.654048 | 264.513664 | 264.6017664 |
| 11/6/2013 7:00  | 0.0254 | 264.6526584 | 264.6509728 | 264.653048 | 264.517664 | 264.6047664 |
| 11/6/2013 7:10  | 0.0254 | 264.6511344 | 264.6469728 | 264.649048 | 264.518664 | 264.6017664 |
| 11/6/2013 7:20  | 0.0254 | 264.648696  | 264.6479728 | 264.647048 | 264.519664 | 264.6027664 |
| 11/6/2013 7:30  | 0.0254 | 264.6462576 | 264.6449728 | 264.645048 | 264.521664 | 264.6017664 |
| 11/6/2013 7:40  | 0.0254 | 264.6459528 | 264.6399728 | 264.643048 | 264.523664 | 264.6007664 |
| 11/6/2013 7:50  | 0.0254 | 264.6438192 | 264.6389728 | 264.638048 | 264.520664 | 264.5967664 |
| 11/6/2013 8:00  | 0.0254 | 264.6416856 | 264.6359728 | 264.636048 | 264.521664 | 264.5957664 |
| 11/6/2013 8:10  | 0.0254 | 264.6398568 | 264.6349728 | 264.633048 | 264.523664 | 264.5967664 |
| 11/6/2013 8:20  | 0.0254 | 264.6383328 | 264.6349728 | 264.632048 | 264.523664 | 264.5937664 |
| 11/6/2013 8:30  | 0.0254 | 264.6371136 | 264.6329728 | 264.631048 | 264.525664 | 264.5927664 |
| 11/6/2013 8:40  | 0.0254 | 264.636504  | 264.6329728 | 264.630048 | 264.524664 | 264.5937664 |
| 11/6/2013 8:50  | 0.0254 | 264.63498   | 264.6289728 | 264.629048 | 264.525664 | 264.5927664 |
| 11/6/2013 9:00  | 0.0254 | 264.6346752 | 264.6309728 | 264.627048 | 264.526664 | 264.5917664 |
| 11/6/2013 9:10  | 0.0254 | 264.633456  | 264.6299728 | 264.627048 | 264.529664 | 264.5927664 |
| 11/6/2013 9:20  | 0.0254 | 264.6337608 | 264.6299728 | 264.627048 | 264.528664 | 264.5927664 |
| 11/6/2013 9:30  | 0.0254 | 264.6337608 | 264.6309728 | 264.626048 | 264.527664 | 264.5917664 |
| 11/6/2013 9:40  | 0.0254 | 264.6328464 | 264.6259728 | 264.623048 | 264.524664 | 264.5907664 |
| 11/6/2013 9:50  | 0.0254 | 264.6310176 | 264.6259728 | 264.624048 | 264.527664 | 264.5907664 |
| 11/6/2013 10:00 | 0.0254 | 264.6307128 | 264.6239728 | 264.620048 | 264.525664 | 264.5887664 |
| 11/6/2013 10:10 | 0.0254 | 264.630408  | 264.6209728 | 264.620048 | 264.527664 | 264.5867664 |
| 11/6/2013 10:20 | 0.0254 | 264.6297984 | 264.6209728 | 264.619048 | 264.529664 | 264.5867664 |
| 11/6/2013 10:30 | 0.0254 | 264.6285792 | 264.6209728 | 264.619048 | 264.529664 | 264.5887664 |
| 11/6/2013 10:40 | 0.0254 | 264.6264456 | 264.6159728 | 264.617048 | 264.528664 | 264.5857664 |
| 11/6/2013 10:50 | 0.0254 | 264.6249216 | 264.6119728 | 264.613048 | 264.528664 | 264.5847664 |
| 11/6/2013 11:00 | 0.0254 | 264.6237024 | 264.6099728 | 264.612048 | 264.532664 | 264.5847664 |
| 11/6/2013 11:10 | 0.0254 | 264.61974   | 264.6089728 | 264.609048 | 264.532664 | 264.5847664 |
| 11/6/2013 11:20 | 0.0254 | 264.6176064 | 264.6019728 | 264.606048 | 264.529664 | 264.5797664 |
| 11/6/2013 11:30 | 0.0254 | 264.616692  | 264.6059728 | 264.605048 | 264.531664 | 264.5817664 |
| 11/6/2013 11:40 | 0.0254 | 264.6157776 | 264.6039728 | 264.602048 | 264.531664 | 264.5797664 |
| 11/6/2013 11:50 | 0.0254 | 264.6118152 | 264.5989728 | 264.599048 | 264.535664 | 264.5797664 |
| 11/6/2013 12:00 | 0.0254 | 264.6087672 | 264.5949728 | 264.598048 | 264.534664 | 264.5737664 |
| 11/6/2013 12:10 | 0.0254 | 264.606024  | 264.5879728 | 264.593048 | 264.530664 | 264.5717664 |
| 11/6/2013 12:20 | 0.0254 | 264.6041952 | 264.5839728 | 264.589048 | 264.531664 | 264.5707664 |
| 11/6/2013 12:30 | 0.0254 | 264.6026712 | 264.5829728 | 264.589048 | 264.535664 | 264.5717664 |
| 11/6/2013 12:40 | 0.0254 | 264.599928  | 264.5849728 | 264.587048 | 264.535664 | 264.5697664 |
| 11/6/2013 12:50 | 0.0254 | 264.5971848 | 264.5819728 | 264.581048 | 264.532664 | 264.5657664 |
| 11/6/2013 13:00 | 0.0254 | 264.5941368 | 264.5799728 | 264.579048 | 264.535664 | 264.5667664 |



|                 |        |             |             |            |            |             |
|-----------------|--------|-------------|-------------|------------|------------|-------------|
| 11/6/2013 13:10 | 0.0254 | 264.5926128 | 264.5749728 | 264.574048 | 264.533664 | 264.5637664 |
| 11/6/2013 13:20 | 0.0254 | 264.592308  | 264.5729728 | 264.573048 | 264.533664 | 264.5647664 |
| 11/6/2013 13:30 | 0.0254 | 264.590784  | 264.5689728 | 264.571048 | 264.532664 | 264.5597664 |
| 11/6/2013 13:40 | 0.0254 | 264.5889552 | 264.5689728 | 264.569048 | 264.533664 | 264.5597664 |
| 11/6/2013 13:50 | 0.0254 | 264.5871264 | 264.5679728 | 264.566048 | 264.530664 | 264.5567664 |
| 11/6/2013 14:00 | 0.0254 | 264.5852976 | 264.5699728 | 264.567048 | 264.533664 | 264.5597664 |
| 11/6/2013 14:10 | 0.0254 | 264.583164  | 264.5659728 | 264.565048 | 264.531664 | 264.5577664 |
| 11/6/2013 14:20 | 0      | 264.5822496 | 264.5609728 | 264.562048 | 264.533664 | 264.5567664 |
| 11/6/2013 14:30 | 0.0254 | 264.5810304 | 264.5599728 | 264.562048 | 264.537664 | 264.5547664 |
| 11/6/2013 14:40 | 0.0254 | 264.578592  | 264.5609728 | 264.559048 | 264.534664 | 264.5537664 |
| 11/6/2013 14:50 | 0.0254 | 264.5758488 | 264.5589728 | 264.557048 | 264.535664 | 264.5517664 |
| 11/6/2013 15:00 | 0.0254 | 264.5752392 | 264.5549728 | 264.555048 | 264.538664 | 264.5517664 |
| 11/6/2013 15:10 | 0.0254 | 264.5749344 | 264.5499728 | 264.554048 | 264.533664 | 264.5487664 |
| 11/6/2013 15:20 | 0.0254 | 264.5728008 | 264.5499728 | 264.553048 | 264.535664 | 264.5497664 |
| 11/6/2013 15:30 | 0.0254 | 264.5703624 | 264.5539728 | 264.553048 | 264.538664 | 264.5477664 |
| 11/6/2013 15:40 | 0.0254 | 264.5700576 | 264.5489728 | 264.550048 | 264.536664 | 264.5467664 |
| 11/6/2013 15:50 | 0.0254 | 264.569448  | 264.5489728 | 264.550048 | 264.538664 | 264.5447664 |
| 11/6/2013 16:00 | 0.0254 | 264.5688384 | 264.5449728 | 264.547048 | 264.536664 | 264.5437664 |
| 11/6/2013 16:10 | 0.0254 | 264.5673144 | 264.5459728 | 264.548048 | 264.536664 | 264.5437664 |
| 11/6/2013 16:20 | 0.0254 | 264.5654856 | 264.5499728 | 264.545048 | 264.535664 | 264.5427664 |
| 11/6/2013 16:30 | 0.0254 | 264.5651808 | 264.5439728 | 264.544048 | 264.535664 | 264.5427664 |
| 11/6/2013 16:40 | 0.0254 | 264.5645712 | 264.5449728 | 264.543048 | 264.535664 | 264.5427664 |
| 11/6/2013 16:50 | 0.0254 | 264.564876  | 264.5429728 | 264.542048 | 264.536664 | 264.5397664 |
| 11/6/2013 17:00 | 0.0254 | 264.5642664 | 264.5449728 | 264.544048 | 264.537664 | 264.5427664 |
| 11/6/2013 17:10 | 0.0254 | 264.5615232 | 264.5459728 | 264.542048 | 264.536664 | 264.5397664 |
| 11/6/2013 17:20 | 0.0254 | 264.5606088 | 264.5459728 | 264.542048 | 264.538664 | 264.5377664 |
| 11/6/2013 17:30 | 0.0254 | 264.5606088 | 264.5389728 | 264.540048 | 264.538664 | 264.5387664 |
| 11/6/2013 17:40 | 0.0254 | 264.5609136 | 264.5399728 | 264.539048 | 264.538664 | 264.5387664 |
| 11/6/2013 17:50 | 0.0254 | 264.55878   | 264.5379728 | 264.539048 | 264.537664 | 264.5387664 |
| 11/6/2013 18:00 | 0.0254 | 264.5584752 | 264.5379728 | 264.536048 | 264.535664 | 264.5357664 |
| 11/6/2013 18:10 | 0.0254 | 264.5575608 | 264.5409728 | 264.536048 | 264.535664 | 264.5367664 |
| 11/6/2013 18:20 | 0.0254 | 264.5569512 | 264.5409728 | 264.539048 | 264.539664 | 264.5367664 |
| 11/6/2013 18:30 | 0.0254 | 264.5569512 | 264.5379728 | 264.536048 | 264.539664 | 264.5357664 |
| 11/6/2013 18:40 | 0.0254 | 264.5581704 | 264.5359728 | 264.537048 | 264.540664 | 264.5357664 |
| 11/6/2013 18:50 | 0.0254 | 264.555732  | 264.5409728 | 264.536048 | 264.539664 | 264.5367664 |
| 11/6/2013 19:00 | 0.0254 | 264.5554272 | 264.5389728 | 264.534048 | 264.538664 | 264.5347664 |
| 11/6/2013 19:10 | 0.0254 | 264.5563416 | 264.5369728 | 264.536048 | 264.538664 | 264.5337664 |
| 11/6/2013 19:20 | 0.0254 | 264.555732  | 264.5369728 | 264.536048 | 264.539664 | 264.5327664 |
| 11/6/2013 19:30 | 0.0254 | 264.5560368 | 264.5369728 | 264.534048 | 264.538664 | 264.5347664 |
| 11/6/2013 19:40 | 0.0254 | 264.5563416 | 264.5369728 | 264.536048 | 264.538664 | 264.5347664 |
| 11/6/2013 19:50 | 0.0254 | 264.5560368 | 264.5389728 | 264.534048 | 264.536664 | 264.5327664 |
| 11/6/2013 20:00 | 0.0254 | 264.5551224 | 264.5389728 | 264.534048 | 264.539664 | 264.5357664 |
| 11/6/2013 20:10 | 0.0254 | 264.5545128 | 264.5389728 | 264.537048 | 264.536664 | 264.5337664 |
| 11/6/2013 20:20 | 0.0254 | 264.5545128 | 264.5389728 | 264.533048 | 264.538664 | 264.5337664 |
| 11/6/2013 20:30 | 0.0254 | 264.555732  | 264.5359728 | 264.533048 | 264.538664 | 264.5337664 |
| 11/6/2013 20:40 | 0.0254 | 264.555732  | 264.5349728 | 264.536048 | 264.538664 | 264.5327664 |
| 11/6/2013 20:50 | 0.0254 | 264.5545128 | 264.5379728 | 264.536048 | 264.538664 | 264.5337664 |

|                 |        |             |             |            |            |             |
|-----------------|--------|-------------|-------------|------------|------------|-------------|
| 11/6/2013 21:00 | 0.0254 | 264.5539032 | 264.5389728 | 264.535048 | 264.536664 | 264.5337664 |
| 11/6/2013 21:10 | 0.0254 | 264.5554272 | 264.5399728 | 264.534048 | 264.536664 | 264.5307664 |
| 11/6/2013 21:20 | 0.0254 | 264.5563416 | 264.5399728 | 264.537048 | 264.538664 | 264.5327664 |
| 11/6/2013 21:30 | 0.0254 | 264.5545128 | 264.5409728 | 264.537048 | 264.536664 | 264.5347664 |
| 11/6/2013 21:40 | 0.0254 | 264.5569512 | 264.5379728 | 264.538048 | 264.538664 | 264.5307664 |
| 11/6/2013 21:50 | 0.0254 | 264.5563416 | 264.5429728 | 264.538048 | 264.535664 | 264.5327664 |
| 11/6/2013 22:00 | 0.0254 | 264.5554272 | 264.5409728 | 264.538048 | 264.538664 | 264.5347664 |
| 11/6/2013 22:10 | 0.0254 | 264.5575608 | 264.5419728 | 264.539048 | 264.537664 | 264.5327664 |
| 11/6/2013 22:20 | 0.0254 | 264.5560368 | 264.5419728 | 264.538048 | 264.537664 | 264.5347664 |
| 11/6/2013 22:30 | 0.0254 | 264.5578656 | 264.5399728 | 264.538048 | 264.536664 | 264.5317664 |
| 11/6/2013 22:40 | 0.0254 | 264.5575608 | 264.5439728 | 264.539048 | 264.534664 | 264.5337664 |
| 11/6/2013 22:50 | 0.0254 | 264.55878   | 264.5419728 | 264.538048 | 264.536664 | 264.5337664 |
| 11/6/2013 23:00 | 0.0254 | 264.55878   | 264.5469728 | 264.542048 | 264.536664 | 264.5337664 |
| 11/6/2013 23:10 | 0      | 264.5596944 | 264.5439728 | 264.542048 | 264.536664 | 264.5357664 |
| 11/6/2013 23:20 | 0      | 264.55878   | 264.5469728 | 264.543048 | 264.536664 | 264.5357664 |
| 11/6/2013 23:30 | 0      | 264.5581704 | 264.5409728 | 264.540048 | 264.535664 | 264.5327664 |
| 11/6/2013 23:40 | 0      | 264.5578656 | 264.5439728 | 264.539048 | 264.533664 | 264.5327664 |
| 11/6/2013 23:50 | 0      | 264.55878   | 264.5449728 | 264.540048 | 264.532664 | 264.5327664 |
| 11/7/2013 0:00  | 0      | 264.5578656 | 264.5439728 | 264.540048 | 264.533664 | 264.5327664 |
| 11/7/2013 0:10  | 0      | 264.5569512 | 264.5459728 | 264.540048 | 264.533664 | 264.5327664 |
| 11/7/2013 0:20  | 0      | 264.557256  | 264.5429728 | 264.540048 | 264.533664 | 264.5337664 |
| 11/7/2013 0:30  | 0      | 264.5560368 | 264.5439728 | 264.538048 | 264.536664 | 264.5357664 |
| 11/7/2013 0:40  | 0      | 264.5548176 | 264.5369728 | 264.538048 | 264.536664 | 264.5307664 |
| 11/7/2013 0:50  | 0      | 264.5554272 | 264.5419728 | 264.537048 | 264.539664 | 264.5337664 |
| 11/7/2013 1:00  | 0      | 264.5548176 | 264.5359728 | 264.536048 | 264.536664 | 264.5307664 |
| 11/7/2013 1:10  | 0      | 264.5529888 | 264.5309728 | 264.535048 | 264.535664 | 264.5287664 |
| 11/7/2013 1:20  | 0      | 264.55116   | 264.5349728 | 264.531048 | 264.533664 | 264.5277664 |
| 11/7/2013 1:30  | 0      | 264.55116   | 264.5289728 | 264.530048 | 264.535664 | 264.5257664 |
| 11/7/2013 1:40  | 0      | 264.549636  | 264.5319728 | 264.532048 | 264.536664 | 264.5297664 |
| 11/7/2013 1:50  | 0      | 264.5468928 | 264.5279728 | 264.526048 | 264.533664 | 264.5257664 |
| 11/7/2013 2:00  | 0      | 264.5471976 | 264.5229728 | 264.525048 | 264.536664 | 264.5237664 |
| 11/7/2013 2:10  | 0      | 264.5453688 | 264.5239728 | 264.524048 | 264.537664 | 264.5247664 |
| 11/7/2013 2:20  | 0      | 264.5429304 | 264.5239728 | 264.520048 | 264.536664 | 264.5237664 |
| 11/7/2013 2:30  | 0      | 264.5401872 | 264.5189728 | 264.516048 | 264.532664 | 264.5187664 |
| 11/7/2013 2:40  | 0      | 264.5386632 | 264.5139728 | 264.516048 | 264.534664 | 264.5177664 |
| 11/7/2013 2:50  | 0      | 264.538968  | 264.5089728 | 264.516048 | 264.534664 | 264.5177664 |
| 11/7/2013 3:00  | 0      | 264.5356152 | 264.5129728 | 264.515048 | 264.533664 | 264.5187664 |
| 11/7/2013 3:10  | 0      | 264.5331768 | 264.5119728 | 264.512048 | 264.535664 | 264.5157664 |
| 11/7/2013 3:20  | 0      | 264.5350056 | 264.5049728 | 264.511048 | 264.533664 | 264.5157664 |
| 11/7/2013 3:30  | 0      | 264.5322624 | 264.5049728 | 264.508048 | 264.535664 | 264.5137664 |
| 11/7/2013 3:40  | 0      | 264.5316528 | 264.5019728 | 264.505048 | 264.532664 | 264.5137664 |
| 11/7/2013 3:50  | 0      | 264.5283    | 264.5049728 | 264.502048 | 264.532664 | 264.5127664 |
| 11/7/2013 4:00  | 0      | 264.5279952 | 264.5019728 | 264.503048 | 264.535664 | 264.5127664 |
| 11/7/2013 4:10  | 0      | 264.5276904 | 264.5009728 | 264.501048 | 264.533664 | 264.5097664 |
| 11/7/2013 4:20  | 0      | 264.5264712 | 264.5029728 | 264.500048 | 264.531664 | 264.5097664 |
| 11/7/2013 4:30  | 0      | 264.5243376 | 264.4979728 | 264.497048 | 264.531664 | 264.5087664 |
| 11/7/2013 4:40  | 0      | 264.523728  | 264.4989728 | 264.496048 | 264.528664 | 264.5067664 |

|                 |   |             |             |            |            |             |
|-----------------|---|-------------|-------------|------------|------------|-------------|
| 11/7/2013 4:50  | 0 | 264.5231184 | 264.4939728 | 264.494048 | 264.529664 | 264.5027664 |
| 11/7/2013 5:00  | 0 | 264.52068   | 264.4919728 | 264.494048 | 264.530664 | 264.5047664 |
| 11/7/2013 5:10  | 0 | 264.5197656 | 264.4919728 | 264.492048 | 264.530664 | 264.5047664 |
| 11/7/2013 5:20  | 0 | 264.5188512 | 264.4899728 | 264.490048 | 264.528664 | 264.5017664 |
| 11/7/2013 5:30  | 0 | 264.5179368 | 264.4889728 | 264.486048 | 264.529664 | 264.4987664 |
| 11/7/2013 5:40  | 0 | 264.5170224 | 264.4869728 | 264.486048 | 264.528664 | 264.5007664 |
| 11/7/2013 5:50  | 0 | 264.5158032 | 264.4849728 | 264.486048 | 264.530664 | 264.5017664 |
| 11/7/2013 6:00  | 0 | 264.5148888 | 264.4899728 | 264.486048 | 264.530664 | 264.5007664 |
| 11/7/2013 6:10  | 0 | 264.5142792 | 264.4869728 | 264.486048 | 264.527664 | 264.5007664 |
| 11/7/2013 6:20  | 0 | 264.5133648 | 264.4869728 | 264.486048 | 264.528664 | 264.4997664 |
| 11/7/2013 6:30  | 0 | 264.51306   | 264.4829728 | 264.482048 | 264.524664 | 264.4957664 |
| 11/7/2013 6:40  | 0 | 264.5112312 | 264.4849728 | 264.483048 | 264.527664 | 264.4977664 |
| 11/7/2013 6:50  | 0 | 264.511536  | 264.4849728 | 264.483048 | 264.527664 | 264.4967664 |
| 11/7/2013 7:00  | 0 | 264.5109264 | 264.4829728 | 264.483048 | 264.529664 | 264.4947664 |
| 11/7/2013 7:10  | 0 | 264.5106216 | 264.4849728 | 264.485048 | 264.528664 | 264.4967664 |
| 11/7/2013 7:20  | 0 | 264.5097072 | 264.4839728 | 264.482048 | 264.528664 | 264.4937664 |
| 11/7/2013 7:30  | 0 | 264.5097072 | 264.4869728 | 264.482048 | 264.526664 | 264.4947664 |
| 11/7/2013 7:40  | 0 | 264.5090976 | 264.4859728 | 264.480048 | 264.525664 | 264.4927664 |
| 11/7/2013 7:50  | 0 | 264.511536  | 264.4879728 | 264.483048 | 264.525664 | 264.4947664 |
| 11/7/2013 8:00  | 0 | 264.510012  | 264.4889728 | 264.484048 | 264.527664 | 264.4947664 |
| 11/7/2013 8:10  | 0 | 264.5106216 | 264.4879728 | 264.486048 | 264.524664 | 264.4957664 |
| 11/7/2013 8:20  | 0 | 264.5106216 | 264.4869728 | 264.483048 | 264.523664 | 264.4927664 |
| 11/7/2013 8:30  | 0 | 264.5121456 | 264.4899728 | 264.487048 | 264.525664 | 264.4937664 |
| 11/7/2013 8:40  | 0 | 264.5127552 | 264.4959728 | 264.488048 | 264.524664 | 264.4957664 |
| 11/7/2013 8:50  | 0 | 264.514584  | 264.4999728 | 264.489048 | 264.525664 | 264.4977664 |
| 11/7/2013 9:00  | 0 | 264.5167176 | 264.5029728 | 264.493048 | 264.526664 | 264.4987664 |
| 11/7/2013 9:10  | 0 | 264.5188512 | 264.5079728 | 264.496048 | 264.525664 | 264.4997664 |
| 11/7/2013 9:20  | 0 | 264.52068   | 264.5099728 | 264.500048 | 264.526664 | 264.5037664 |
| 11/7/2013 9:30  | 0 | 264.5234232 | 264.5139728 | 264.503048 | 264.524664 | 264.5037664 |
| 11/7/2013 9:40  | 0 | 264.5255568 | 264.5219728 | 264.507048 | 264.524664 | 264.5067664 |
| 11/7/2013 9:50  | 0 | 264.5304336 | 264.5229728 | 264.510048 | 264.521664 | 264.5077664 |
| 11/7/2013 10:00 | 0 | 264.5316528 | 264.5259728 | 264.514048 | 264.522664 | 264.5087664 |
| 11/7/2013 10:10 | 0 | 264.532872  | 264.5229728 | 264.515048 | 264.522664 | 264.5077664 |
| 11/7/2013 10:20 | 0 | 264.532872  | 264.5159728 | 264.515048 | 264.521664 | 264.5057664 |
| 11/7/2013 10:30 | 0 | 264.5340912 | 264.5289728 | 264.518048 | 264.524664 | 264.5127664 |
| 11/7/2013 10:40 | 0 | 264.5350056 | 264.5289728 | 264.519048 | 264.523664 | 264.5127664 |
| 11/7/2013 10:50 | 0 | 264.5340912 | 264.5159728 | 264.518048 | 264.524664 | 264.5077664 |
| 11/7/2013 11:00 | 0 | 264.5331768 | 264.5179728 | 264.518048 | 264.522664 | 264.5097664 |
| 11/7/2013 11:10 | 0 | 264.531348  | 264.5249728 | 264.518048 | 264.522664 | 264.5097664 |
| 11/7/2013 11:20 | 0 | 264.531348  | 264.5199728 | 264.519048 | 264.522664 | 264.5077664 |
| 11/7/2013 11:30 | 0 | 264.5295192 | 264.5159728 | 264.514048 | 264.522664 | 264.5097664 |
| 11/7/2013 11:40 | 0 | 264.5292144 | 264.5139728 | 264.512048 | 264.521664 | 264.5047664 |
| 11/7/2013 11:50 | 0 | 264.5279952 | 264.5149728 | 264.512048 | 264.523664 | 264.5057664 |
| 11/7/2013 12:00 | 0 | 264.5258616 | 264.5129728 | 264.511048 | 264.519664 | 264.5047664 |
| 11/7/2013 12:10 | 0 | 264.5264712 | 264.5079728 | 264.510048 | 264.522664 | 264.5037664 |
| 11/7/2013 12:20 | 0 | 264.5243376 | 264.5119728 | 264.508048 | 264.522664 | 264.5047664 |
| 11/7/2013 12:30 | 0 | 264.5231184 | 264.5069728 | 264.506048 | 264.521664 | 264.5027664 |

|                 |   |             |             |            |            |             |
|-----------------|---|-------------|-------------|------------|------------|-------------|
| 11/7/2013 12:40 | 0 | 264.5234232 | 264.5059728 | 264.507048 | 264.523664 | 264.5037664 |
| 11/7/2013 12:50 | 0 | 264.5212896 | 264.5099728 | 264.507048 | 264.523664 | 264.5017664 |
| 11/7/2013 13:00 | 0 | 264.52068   | 264.5039728 | 264.505048 | 264.521664 | 264.5027664 |
| 11/7/2013 13:10 | 0 | 264.5197656 | 264.5019728 | 264.503048 | 264.523664 | 264.5017664 |
| 11/7/2013 13:20 | 0 | 264.5173272 | 264.5009728 | 264.499048 | 264.520664 | 264.4987664 |
| 11/7/2013 13:30 | 0 | 264.517632  | 264.4959728 | 264.498048 | 264.521664 | 264.4967664 |
| 11/7/2013 13:40 | 0 | 264.5154984 | 264.4979728 | 264.499048 | 264.521664 | 264.4997664 |
| 11/7/2013 13:50 | 0 | 264.5148888 | 264.4989728 | 264.498048 | 264.519664 | 264.4977664 |
| 11/7/2013 14:00 | 0 | 264.5136696 | 264.4989728 | 264.497048 | 264.521664 | 264.4977664 |
| 11/7/2013 14:10 | 0 | 264.5151936 | 264.4979728 | 264.497048 | 264.519664 | 264.4967664 |
| 11/7/2013 14:20 | 0 | 264.5139744 | 264.5019728 | 264.498048 | 264.521664 | 264.4977664 |
| 11/7/2013 14:30 | 0 | 264.5133648 | 264.4989728 | 264.494048 | 264.521664 | 264.4967664 |
| 11/7/2013 14:40 | 0 | 264.5142792 | 264.4989728 | 264.495048 | 264.517664 | 264.4967664 |
| 11/7/2013 14:50 | 0 | 264.5121456 | 264.4989728 | 264.494048 | 264.519664 | 264.4947664 |
| 11/7/2013 15:00 | 0 | 264.5133648 | 264.4939728 | 264.495048 | 264.521664 | 264.4947664 |
| 11/7/2013 15:10 | 0 | 264.511536  | 264.4979728 | 264.493048 | 264.521664 | 264.4947664 |
| 11/7/2013 15:20 | 0 | 264.5103168 | 264.4929728 | 264.491048 | 264.519664 | 264.4947664 |
| 11/7/2013 15:30 | 0 | 264.5112312 | 264.4939728 | 264.490048 | 264.519664 | 264.4927664 |
| 11/7/2013 15:40 | 0 | 264.5103168 | 264.4979728 | 264.491048 | 264.519664 | 264.4927664 |
| 11/7/2013 15:50 | 0 | 264.511536  | 264.4959728 | 264.491048 | 264.520664 | 264.4927664 |
| 11/7/2013 16:00 | 0 | 264.5097072 | 264.4959728 | 264.491048 | 264.519664 | 264.4927664 |
| 11/7/2013 16:10 | 0 | 264.5081832 | 264.4929728 | 264.490048 | 264.519664 | 264.4917664 |
| 11/7/2013 16:20 | 0 | 264.5090976 | 264.4889728 | 264.490048 | 264.520664 | 264.4907664 |
| 11/7/2013 16:30 | 0 | 264.5072688 | 264.4939728 | 264.489048 | 264.519664 | 264.4907664 |
| 11/7/2013 16:40 | 0 | 264.5063544 | 264.4879728 | 264.486048 | 264.520664 | 264.4897664 |
| 11/7/2013 16:50 | 0 | 264.5066592 | 264.4879728 | 264.486048 | 264.519664 | 264.4897664 |
| 11/7/2013 17:00 | 0 | 264.5057448 | 264.4879728 | 264.486048 | 264.520664 | 264.4897664 |
| 11/7/2013 17:10 | 0 | 264.5048304 | 264.4879728 | 264.482048 | 264.516664 | 264.4877664 |
| 11/7/2013 17:20 | 0 | 264.5042208 | 264.4849728 | 264.481048 | 264.515664 | 264.4867664 |
| 11/7/2013 17:30 | 0 | 264.503916  | 264.4879728 | 264.483048 | 264.516664 | 264.4867664 |
| 11/7/2013 17:40 | 0 | 264.5036112 | 264.4879728 | 264.483048 | 264.518664 | 264.4877664 |
| 11/7/2013 17:50 | 0 | 264.5045256 | 264.4839728 | 264.483048 | 264.516664 | 264.4847664 |
| 11/7/2013 18:00 | 0 | 264.5036112 | 264.4869728 | 264.481048 | 264.516664 | 264.4867664 |
| 11/7/2013 18:10 | 0 | 264.502392  | 264.4869728 | 264.483048 | 264.518664 | 264.4867664 |
| 11/7/2013 18:20 | 0 | 264.5017824 | 264.4839728 | 264.480048 | 264.516664 | 264.4847664 |
| 11/7/2013 18:30 | 0 | 264.5002584 | 264.4849728 | 264.482048 | 264.516664 | 264.4867664 |
| 11/7/2013 18:40 | 0 | 264.5005632 | 264.4809728 | 264.478048 | 264.513664 | 264.4837664 |
| 11/7/2013 18:50 | 0 | 264.5014776 | 264.4789728 | 264.478048 | 264.514664 | 264.4827664 |
| 11/7/2013 19:00 | 0 | 264.5005632 | 264.4869728 | 264.482048 | 264.517664 | 264.4857664 |
| 11/7/2013 19:10 | 0 | 264.4999536 | 264.4859728 | 264.479048 | 264.515664 | 264.4877664 |
| 11/7/2013 19:20 | 0 | 264.5014776 | 264.4829728 | 264.480048 | 264.514664 | 264.4827664 |
| 11/7/2013 19:30 | 0 | 264.5014776 | 264.4859728 | 264.482048 | 264.515664 | 264.4857664 |
| 11/7/2013 19:40 | 0 | 264.5005632 | 264.4859728 | 264.482048 | 264.514664 | 264.4857664 |
| 11/7/2013 19:50 | 0 | 264.5011728 | 264.4899728 | 264.482048 | 264.513664 | 264.4877664 |
| 11/7/2013 20:00 | 0 | 264.5017824 | 264.4889728 | 264.480048 | 264.515664 | 264.4857664 |
| 11/7/2013 20:10 | 0 | 264.5033064 | 264.4889728 | 264.483048 | 264.512664 | 264.4857664 |
| 11/7/2013 20:20 | 0 | 264.5017824 | 264.4919728 | 264.483048 | 264.515664 | 264.4867664 |

|                 |   |             |             |            |            |             |
|-----------------|---|-------------|-------------|------------|------------|-------------|
| 11/7/2013 20:30 | 0 | 264.5042208 | 264.4889728 | 264.485048 | 264.513664 | 264.4857664 |
| 11/7/2013 20:40 | 0 | 264.5026968 | 264.4949728 | 264.485048 | 264.515664 | 264.4867664 |
| 11/7/2013 20:50 | 0 | 264.5045256 | 264.4869728 | 264.483048 | 264.511664 | 264.4837664 |
| 11/7/2013 21:00 | 0 | 264.5030016 | 264.4919728 | 264.485048 | 264.513664 | 264.4867664 |
| 11/7/2013 21:10 | 0 | 264.5030016 | 264.4919728 | 264.486048 | 264.509664 | 264.4867664 |
| 11/7/2013 21:20 | 0 | 264.5045256 | 264.4999728 | 264.489048 | 264.514664 | 264.4897664 |
| 11/7/2013 21:30 | 0 | 264.5045256 | 264.4929728 | 264.486048 | 264.512664 | 264.4867664 |
| 11/7/2013 21:40 | 0 | 264.5060496 | 264.4979728 | 264.489048 | 264.512664 | 264.4887664 |
| 11/7/2013 21:50 | 0 | 264.506964  | 264.4969728 | 264.490048 | 264.514664 | 264.4887664 |
| 11/7/2013 22:00 | 0 | 264.5075736 | 264.4979728 | 264.493048 | 264.514664 | 264.4897664 |
| 11/7/2013 22:10 | 0 | 264.506964  | 264.4979728 | 264.492048 | 264.511664 | 264.4897664 |
| 11/7/2013 22:20 | 0 | 264.5090976 | 264.4999728 | 264.492048 | 264.512664 | 264.4917664 |
| 11/7/2013 22:30 | 0 | 264.5087928 | 264.4979728 | 264.492048 | 264.514664 | 264.4917664 |
| 11/7/2013 22:40 | 0 | 264.5078784 | 264.4949728 | 264.490048 | 264.511664 | 264.4897664 |
| 11/7/2013 22:50 | 0 | 264.506964  | 264.4949728 | 264.492048 | 264.510664 | 264.4897664 |
| 11/7/2013 23:00 | 0 | 264.5078784 | 264.4979728 | 264.492048 | 264.510664 | 264.4897664 |
| 11/7/2013 23:10 | 0 | 264.5075736 | 264.4949728 | 264.492048 | 264.512664 | 264.4897664 |
| 11/7/2013 23:20 | 0 | 264.5066592 | 264.4979728 | 264.493048 | 264.511664 | 264.4907664 |
| 11/7/2013 23:30 | 0 | 264.5072688 | 264.4979728 | 264.489048 | 264.511664 | 264.4907664 |
| 11/7/2013 23:40 | 0 | 264.5060496 | 264.4939728 | 264.490048 | 264.511664 | 264.4877664 |
| 11/7/2013 23:50 | 0 | 264.5060496 | 264.4979728 | 264.490048 | 264.510664 | 264.4897664 |
| 11/8/2013 0:00  | 0 | 264.5075736 | 264.4969728 | 264.492048 | 264.511664 | 264.4887664 |
| 11/8/2013 0:10  | 0 | 264.506964  | 264.4959728 | 264.492048 | 264.511664 | 264.4887664 |
| 11/8/2013 0:20  | 0 | 264.5060496 | 264.4939728 | 264.489048 | 264.510664 | 264.4877664 |
| 11/8/2013 0:30  | 0 | 264.5048304 | 264.4909728 | 264.489048 | 264.511664 | 264.4857664 |
| 11/8/2013 0:40  | 0 | 264.5026968 | 264.4879728 | 264.485048 | 264.508664 | 264.4857664 |
| 11/8/2013 0:50  | 0 | 264.502392  | 264.4869728 | 264.488048 | 264.512664 | 264.4887664 |
| 11/8/2013 1:00  | 0 | 264.5002584 | 264.4869728 | 264.486048 | 264.512664 | 264.4857664 |
| 11/8/2013 1:10  | 0 | 264.5005632 | 264.4829728 | 264.480048 | 264.509664 | 264.4837664 |
| 11/8/2013 1:20  | 0 | 264.4999536 | 264.4839728 | 264.482048 | 264.509664 | 264.4857664 |
| 11/8/2013 1:30  | 0 | 264.49782   | 264.4789728 | 264.477048 | 264.509664 | 264.4817664 |
| 11/8/2013 1:40  | 0 | 264.4984296 | 264.4819728 | 264.478048 | 264.510664 | 264.4827664 |
| 11/8/2013 1:50  | 0 | 264.4959912 | 264.4769728 | 264.477048 | 264.508664 | 264.4817664 |
| 11/8/2013 2:00  | 0 | 264.4959912 | 264.4719728 | 264.474048 | 264.508664 | 264.4817664 |
| 11/8/2013 2:10  | 0 | 264.493248  | 264.4719728 | 264.472048 | 264.506664 | 264.4777664 |
| 11/8/2013 2:20  | 0 | 264.4938576 | 264.4629728 | 264.469048 | 264.509664 | 264.4777664 |
| 11/8/2013 2:30  | 0 | 264.4905048 | 264.4679728 | 264.468048 | 264.509664 | 264.4777664 |
| 11/8/2013 2:40  | 0 | 264.4902    | 264.4629728 | 264.465048 | 264.507664 | 264.4767664 |
| 11/8/2013 2:50  | 0 | 264.488676  | 264.4579728 | 264.462048 | 264.508664 | 264.4737664 |
| 11/8/2013 3:00  | 0 | 264.487152  | 264.4569728 | 264.461048 | 264.508664 | 264.4717664 |
| 11/8/2013 3:10  | 0 | 264.4847136 | 264.4609728 | 264.458048 | 264.509664 | 264.4737664 |
| 11/8/2013 3:20  | 0 | 264.4831896 | 264.4579728 | 264.457048 | 264.506664 | 264.4707664 |
| 11/8/2013 3:30  | 0 | 264.4819704 | 264.4539728 | 264.455048 | 264.506664 | 264.4687664 |
| 11/8/2013 3:40  | 0 | 264.4807512 | 264.4549728 | 264.454048 | 264.506664 | 264.4717664 |
| 11/8/2013 3:50  | 0 | 264.479532  | 264.4549728 | 264.453048 | 264.506664 | 264.4677664 |
| 11/8/2013 4:00  | 0 | 264.4789224 | 264.4459728 | 264.450048 | 264.506664 | 264.4667664 |
| 11/8/2013 4:10  | 0 | 264.4783128 | 264.4449728 | 264.447048 | 264.504664 | 264.4657664 |

|                 |   |             |             |            |            |             |
|-----------------|---|-------------|-------------|------------|------------|-------------|
| 11/8/2013 4:20  | 0 | 264.4767888 | 264.4439728 | 264.447048 | 264.505664 | 264.4657664 |
| 11/8/2013 4:30  | 0 | 264.4743504 | 264.4459728 | 264.445048 | 264.505664 | 264.4657664 |
| 11/8/2013 4:40  | 0 | 264.4743504 | 264.4419728 | 264.443048 | 264.504664 | 264.4617664 |
| 11/8/2013 4:50  | 0 | 264.4725216 | 264.4409728 | 264.444048 | 264.503664 | 264.4617664 |
| 11/8/2013 5:00  | 0 | 264.4716072 | 264.4409728 | 264.441048 | 264.503664 | 264.4617664 |
| 11/8/2013 5:10  | 0 | 264.4709976 | 264.4389728 | 264.440048 | 264.504664 | 264.4617664 |
| 11/8/2013 5:20  | 0 | 264.4697784 | 264.4389728 | 264.440048 | 264.504664 | 264.4597664 |
| 11/8/2013 5:30  | 0 | 264.468864  | 264.4369728 | 264.437048 | 264.502664 | 264.4587664 |
| 11/8/2013 5:40  | 0 | 264.4676448 | 264.4399728 | 264.438048 | 264.504664 | 264.4597664 |
| 11/8/2013 5:50  | 0 | 264.46734   | 264.4379728 | 264.437048 | 264.503664 | 264.4597664 |
| 11/8/2013 6:00  | 0 | 264.46734   | 264.4379728 | 264.437048 | 264.502664 | 264.4597664 |
| 11/8/2013 6:10  | 0 | 264.4667304 | 264.4379728 | 264.437048 | 264.503664 | 264.4587664 |
| 11/8/2013 6:20  | 0 | 264.465816  | 264.4359728 | 264.436048 | 264.501664 | 264.4567664 |
| 11/8/2013 6:30  | 0 | 264.4655112 | 264.4359728 | 264.434048 | 264.499664 | 264.4577664 |
| 11/8/2013 6:40  | 0 | 264.4655112 | 264.4389728 | 264.436048 | 264.502664 | 264.4577664 |
| 11/8/2013 6:50  | 0 | 264.4652064 | 264.4399728 | 264.435048 | 264.500664 | 264.4547664 |
| 11/8/2013 7:00  | 0 | 264.4661208 | 264.4379728 | 264.436048 | 264.499664 | 264.4557664 |
| 11/8/2013 7:10  | 0 | 264.4655112 | 264.4409728 | 264.437048 | 264.502664 | 264.4567664 |
| 11/8/2013 7:20  | 0 | 264.4655112 | 264.4399728 | 264.437048 | 264.500664 | 264.4567664 |
| 11/8/2013 7:30  | 0 | 264.465816  | 264.4439728 | 264.439048 | 264.500664 | 264.4587664 |
| 11/8/2013 7:40  | 0 | 264.4664256 | 264.4439728 | 264.440048 | 264.500664 | 264.4587664 |
| 11/8/2013 7:50  | 0 | 264.4664256 | 264.4469728 | 264.440048 | 264.500664 | 264.4577664 |
| 11/8/2013 8:00  | 0 | 264.4691688 | 264.4469728 | 264.443048 | 264.500664 | 264.4577664 |
| 11/8/2013 8:10  | 0 | 264.4694736 | 264.4489728 | 264.444048 | 264.500664 | 264.4577664 |
| 11/8/2013 8:20  | 0 | 264.4685592 | 264.4489728 | 264.443048 | 264.496664 | 264.4567664 |
| 11/8/2013 8:30  | 0 | 264.4709976 | 264.4519728 | 264.447048 | 264.500664 | 264.4577664 |
| 11/8/2013 8:40  | 0 | 264.4716072 | 264.4549728 | 264.448048 | 264.499664 | 264.4607664 |
| 11/8/2013 8:50  | 0 | 264.4728264 | 264.4619728 | 264.451048 | 264.496664 | 264.4627664 |
| 11/8/2013 9:00  | 0 | 264.4761792 | 264.4659728 | 264.455048 | 264.497664 | 264.4647664 |
| 11/8/2013 9:10  | 0 | 264.4777032 | 264.4639728 | 264.458048 | 264.499664 | 264.4647664 |
| 11/8/2013 9:20  | 0 | 264.4758744 | 264.4489728 | 264.456048 | 264.498664 | 264.4597664 |
| 11/8/2013 9:30  | 0 | 264.4722168 | 264.4519728 | 264.451048 | 264.494664 | 264.4617664 |
| 11/8/2013 9:40  | 0 | 264.4725216 | 264.4519728 | 264.451048 | 264.494664 | 264.4597664 |
| 11/8/2013 9:50  | 0 | 264.4700832 | 264.4469728 | 264.447048 | 264.495664 | 264.4577664 |
| 11/8/2013 10:00 | 0 | 264.4700832 | 264.4549728 | 264.449048 | 264.496664 | 264.4597664 |
| 11/8/2013 10:10 | 0 | 264.4722168 | 264.4589728 | 264.450048 | 264.495664 | 264.4627664 |
| 11/8/2013 10:20 | 0 | 264.4743504 | 264.4589728 | 264.452048 | 264.496664 | 264.4607664 |
| 11/8/2013 10:30 | 0 | 264.4743504 | 264.4629728 | 264.454048 | 264.495664 | 264.4617664 |
| 11/8/2013 10:40 | 0 | 264.47496   | 264.4599728 | 264.454048 | 264.495664 | 264.4597664 |
| 11/8/2013 10:50 | 0 | 264.4755696 | 264.4619728 | 264.456048 | 264.496664 | 264.4627664 |
| 11/8/2013 11:00 | 0 | 264.4761792 | 264.4609728 | 264.455048 | 264.494664 | 264.4607664 |
| 11/8/2013 11:10 | 0 | 264.4752648 | 264.4569728 | 264.455048 | 264.494664 | 264.4607664 |
| 11/8/2013 11:20 | 0 | 264.4758744 | 264.4529728 | 264.456048 | 264.494664 | 264.4607664 |
| 11/8/2013 11:30 | 0 | 264.4725216 | 264.4589728 | 264.454048 | 264.495664 | 264.4607664 |
| 11/8/2013 11:40 | 0 | 264.4722168 | 264.4479728 | 264.451048 | 264.491664 | 264.4567664 |
| 11/8/2013 11:50 | 0 | 264.470388  | 264.4529728 | 264.450048 | 264.495664 | 264.4587664 |
| 11/8/2013 12:00 | 0 | 264.4700832 | 264.4439728 | 264.450048 | 264.496664 | 264.4567664 |

|                 |   |             |             |            |            |             |
|-----------------|---|-------------|-------------|------------|------------|-------------|
| 11/8/2013 12:10 | 0 | 264.4649016 | 264.4479728 | 264.446048 | 264.493664 | 264.4587664 |
| 11/8/2013 12:20 | 0 | 264.4667304 | 264.4369728 | 264.442048 | 264.491664 | 264.4537664 |
| 11/8/2013 12:30 | 0 | 264.4661208 | 264.4439728 | 264.445048 | 264.496664 | 264.4567664 |
| 11/8/2013 12:40 | 0 | 264.4639872 | 264.4459728 | 264.441048 | 264.492664 | 264.4557664 |
| 11/8/2013 12:50 | 0 | 264.4667304 | 264.4459728 | 264.443048 | 264.494664 | 264.4567664 |
| 11/8/2013 13:00 | 0 | 264.4655112 | 264.4429728 | 264.443048 | 264.493664 | 264.4557664 |
| 11/8/2013 13:10 | 0 | 264.4636824 | 264.4419728 | 264.439048 | 264.490664 | 264.4547664 |
| 11/8/2013 13:20 | 0 | 264.4633776 | 264.4409728 | 264.439048 | 264.493664 | 264.4557664 |
| 11/8/2013 13:30 | 0 | 264.4621584 | 264.4409728 | 264.438048 | 264.491664 | 264.4547664 |
| 11/8/2013 13:40 | 0 | 264.4630728 | 264.4389728 | 264.440048 | 264.492664 | 264.4557664 |
| 11/8/2013 13:50 | 0 | 264.4615488 | 264.4389728 | 264.436048 | 264.494664 | 264.4547664 |
| 11/8/2013 14:00 | 0 | 264.4615488 | 264.4399728 | 264.436048 | 264.490664 | 264.4547664 |
| 11/8/2013 14:10 | 0 | 264.461244  | 264.4399728 | 264.435048 | 264.490664 | 264.4547664 |
| 11/8/2013 14:20 | 0 | 264.4603296 | 264.4379728 | 264.434048 | 264.491664 | 264.4527664 |
| 11/8/2013 14:30 | 0 | 264.4609392 | 264.4329728 | 264.434048 | 264.489664 | 264.4517664 |
| 11/8/2013 14:40 | 0 | 264.4600248 | 264.4339728 | 264.435048 | 264.491664 | 264.4527664 |
| 11/8/2013 14:50 | 0 | 264.4591104 | 264.4359728 | 264.434048 | 264.490664 | 264.4517664 |
| 11/8/2013 15:00 | 0 | 264.4585008 | 264.4369728 | 264.431048 | 264.489664 | 264.4507664 |
| 11/8/2013 15:10 | 0 | 264.458196  | 264.4349728 | 264.431048 | 264.489664 | 264.4507664 |
| 11/8/2013 15:20 | 0 | 264.4575864 | 264.4339728 | 264.433048 | 264.489664 | 264.4487664 |
| 11/8/2013 15:30 | 0 | 264.4578912 | 264.4329728 | 264.433048 | 264.490664 | 264.4497664 |
| 11/8/2013 15:40 | 0 | 264.4569768 | 264.4329728 | 264.429048 | 264.487664 | 264.4467664 |
| 11/8/2013 15:50 | 0 | 264.456672  | 264.4359728 | 264.432048 | 264.489664 | 264.4497664 |
| 11/8/2013 16:00 | 0 | 264.4560624 | 264.4369728 | 264.431048 | 264.489664 | 264.4487664 |
| 11/8/2013 16:10 | 0 | 264.4560624 | 264.4319728 | 264.428048 | 264.487664 | 264.4467664 |
| 11/8/2013 16:20 | 0 | 264.455148  | 264.4349728 | 264.429048 | 264.488664 | 264.4477664 |
| 11/8/2013 16:30 | 0 | 264.4548432 | 264.4349728 | 264.431048 | 264.488664 | 264.4467664 |
| 11/8/2013 16:40 | 0 | 264.4539288 | 264.4279728 | 264.429048 | 264.488664 | 264.4447664 |
| 11/8/2013 16:50 | 0 | 264.4533192 | 264.4329728 | 264.430048 | 264.486664 | 264.4467664 |
| 11/8/2013 17:00 | 0 | 264.4530144 | 264.4319728 | 264.427048 | 264.486664 | 264.4447664 |
| 11/8/2013 17:10 | 0 | 264.4524048 | 264.4319728 | 264.428048 | 264.489664 | 264.4467664 |
| 11/8/2013 17:20 | 0 | 264.4527096 | 264.4329728 | 264.428048 | 264.487664 | 264.4457664 |
| 11/8/2013 17:30 | 0 | 264.4524048 | 264.4309728 | 264.427048 | 264.485664 | 264.4457664 |
| 11/8/2013 17:40 | 0 | 264.4511856 | 264.4329728 | 264.427048 | 264.484664 | 264.4457664 |
| 11/8/2013 17:50 | 0 | 264.4524048 | 264.4299728 | 264.428048 | 264.485664 | 264.4457664 |
| 11/8/2013 18:00 | 0 | 264.4517952 | 264.4279728 | 264.427048 | 264.484664 | 264.4447664 |
| 11/8/2013 18:10 | 0 | 264.4517952 | 264.4269728 | 264.424048 | 264.482664 | 264.4427664 |
| 11/8/2013 18:20 | 0 | 264.4514904 | 264.4279728 | 264.426048 | 264.485664 | 264.4417664 |
| 11/8/2013 18:30 | 0 | 264.4511856 | 264.4299728 | 264.427048 | 264.481664 | 264.4427664 |
| 11/8/2013 18:40 | 0 | 264.4502712 | 264.4329728 | 264.426048 | 264.485664 | 264.4437664 |
| 11/8/2013 18:50 | 0 | 264.4502712 | 264.4309728 | 264.426048 | 264.483664 | 264.4427664 |
| 11/8/2013 19:00 | 0 | 264.4502712 | 264.4329728 | 264.429048 | 264.485664 | 264.4437664 |
| 11/8/2013 19:10 | 0 | 264.4508808 | 264.4299728 | 264.424048 | 264.483664 | 264.4437664 |
| 11/8/2013 19:20 | 0 | 264.4511856 | 264.4269728 | 264.426048 | 264.484664 | 264.4427664 |
| 11/8/2013 19:30 | 0 | 264.450576  | 264.4329728 | 264.426048 | 264.481664 | 264.4427664 |
| 11/8/2013 19:40 | 0 | 264.4502712 | 264.4319728 | 264.427048 | 264.486664 | 264.4447664 |
| 11/8/2013 19:50 | 0 | 264.4502712 | 264.4309728 | 264.428048 | 264.483664 | 264.4417664 |

|                 |   |             |             |            |            |             |
|-----------------|---|-------------|-------------|------------|------------|-------------|
| 11/8/2013 20:00 | 0 | 264.450576  | 264.4309728 | 264.427048 | 264.482664 | 264.4427664 |
| 11/8/2013 20:10 | 0 | 264.4502712 | 264.4379728 | 264.430048 | 264.483664 | 264.4427664 |
| 11/8/2013 20:20 | 0 | 264.4508808 | 264.4349728 | 264.428048 | 264.482664 | 264.4427664 |
| 11/8/2013 20:30 | 0 | 264.4517952 | 264.4359728 | 264.429048 | 264.483664 | 264.4437664 |
| 11/8/2013 20:40 | 0 | 264.4521    | 264.4409728 | 264.433048 | 264.480664 | 264.4437664 |
| 11/8/2013 20:50 | 0 | 264.4530144 | 264.4349728 | 264.431048 | 264.483664 | 264.4427664 |
| 11/8/2013 21:00 | 0 | 264.4527096 | 264.4389728 | 264.433048 | 264.481664 | 264.4457664 |
| 11/8/2013 21:10 | 0 | 264.4517952 | 264.4379728 | 264.430048 | 264.481664 | 264.4457664 |
| 11/8/2013 21:20 | 0 | 264.4533192 | 264.4339728 | 264.430048 | 264.483664 | 264.4407664 |
| 11/8/2013 21:30 | 0 | 264.4517952 | 264.4349728 | 264.430048 | 264.480664 | 264.4427664 |
| 11/8/2013 21:40 | 0 | 264.450576  | 264.4369728 | 264.428048 | 264.479664 | 264.4397664 |
| 11/8/2013 21:50 | 0 | 264.4533192 | 264.4399728 | 264.431048 | 264.477664 | 264.4427664 |
| 11/8/2013 22:00 | 0 | 264.4539288 | 264.4349728 | 264.430048 | 264.476664 | 264.4397664 |
| 11/8/2013 22:10 | 0 | 264.4517952 | 264.4399728 | 264.431048 | 264.479664 | 264.4417664 |
| 11/8/2013 22:20 | 0 | 264.4524048 | 264.4379728 | 264.431048 | 264.479664 | 264.4417664 |
| 11/8/2013 22:30 | 0 | 264.453624  | 264.4359728 | 264.432048 | 264.476664 | 264.4417664 |
| 11/8/2013 22:40 | 0 | 264.4539288 | 264.4379728 | 264.432048 | 264.480664 | 264.4437664 |
| 11/8/2013 22:50 | 0 | 264.4521    | 264.4359728 | 264.432048 | 264.478664 | 264.4407664 |
| 11/8/2013 23:00 | 0 | 264.4517952 | 264.4389728 | 264.432048 | 264.479664 | 264.4407664 |
| 11/8/2013 23:10 | 0 | 264.4524048 | 264.4329728 | 264.429048 | 264.478664 | 264.4417664 |
| 11/8/2013 23:20 | 0 | 264.4521    | 264.4349728 | 264.433048 | 264.479664 | 264.4417664 |
| 11/8/2013 23:30 | 0 | 264.4514904 | 264.4379728 | 264.431048 | 264.477664 | 264.4427664 |
| 11/8/2013 23:40 | 0 | 264.4514904 | 264.4349728 | 264.429048 | 264.477664 | 264.4397664 |
| 11/8/2013 23:50 | 0 | 264.4517952 | 264.4349728 | 264.431048 | 264.476664 | 264.4397664 |
| 11/9/2013 0:00  | 0 | 264.4514904 | 264.4369728 | 264.431048 | 264.478664 | 264.4427664 |
| 11/9/2013 0:10  | 0 | 264.4511856 | 264.4339728 | 264.428048 | 264.476664 | 264.4397664 |
| 11/9/2013 0:20  | 0 | 264.450576  | 264.4309728 | 264.428048 | 264.475664 | 264.4387664 |
| 11/9/2013 0:30  | 0 | 264.4502712 | 264.4319728 | 264.427048 | 264.473664 | 264.4387664 |
| 11/9/2013 0:40  | 0 | 264.4496616 | 264.4339728 | 264.429048 | 264.477664 | 264.4407664 |
| 11/9/2013 0:50  | 0 | 264.4493568 | 264.4339728 | 264.428048 | 264.475664 | 264.4407664 |
| 11/9/2013 1:00  | 0 | 264.4493568 | 264.4309728 | 264.427048 | 264.474664 | 264.4397664 |
| 11/9/2013 1:10  | 0 | 264.4496616 | 264.4289728 | 264.428048 | 264.475664 | 264.4397664 |
| 11/9/2013 1:20  | 0 | 264.4484424 | 264.4299728 | 264.425048 | 264.473664 | 264.4397664 |
| 11/9/2013 1:30  | 0 | 264.4481376 | 264.4269728 | 264.425048 | 264.473664 | 264.4367664 |
| 11/9/2013 1:40  | 0 | 264.447528  | 264.4239728 | 264.424048 | 264.472664 | 264.4357664 |
| 11/9/2013 1:50  | 0 | 264.4466136 | 264.4269728 | 264.422048 | 264.472664 | 264.4357664 |
| 11/9/2013 2:00  | 0 | 264.4463088 | 264.4259728 | 264.421048 | 264.473664 | 264.4347664 |
| 11/9/2013 2:10  | 0 | 264.446004  | 264.4239728 | 264.422048 | 264.474664 | 264.4357664 |
| 11/9/2013 2:20  | 0 | 264.4453944 | 264.4239728 | 264.421048 | 264.473664 | 264.4327664 |
| 11/9/2013 2:30  | 0 | 264.4447848 | 264.4249728 | 264.419048 | 264.471664 | 264.4317664 |
| 11/9/2013 2:40  | 0 | 264.4438704 | 264.4229728 | 264.418048 | 264.473664 | 264.4337664 |
| 11/9/2013 2:50  | 0 | 264.4438704 | 264.4229728 | 264.419048 | 264.473664 | 264.4347664 |
| 11/9/2013 3:00  | 0 | 264.4435656 | 264.4159728 | 264.415048 | 264.469664 | 264.4317664 |
| 11/9/2013 3:10  | 0 | 264.4423464 | 264.4199728 | 264.415048 | 264.471664 | 264.4327664 |
| 11/9/2013 3:20  | 0 | 264.441432  | 264.4159728 | 264.414048 | 264.469664 | 264.4317664 |
| 11/9/2013 3:30  | 0 | 264.4408224 | 264.4159728 | 264.415048 | 264.469664 | 264.4317664 |
| 11/9/2013 3:40  | 0 | 264.439908  | 264.4159728 | 264.413048 | 264.471664 | 264.4317664 |



|                 |   |             |             |            |            |             |
|-----------------|---|-------------|-------------|------------|------------|-------------|
| 11/9/2013 3:50  | 0 | 264.4392984 | 264.4169728 | 264.413048 | 264.472664 | 264.4297664 |
| 11/9/2013 4:00  | 0 | 264.4389936 | 264.4139728 | 264.411048 | 264.471664 | 264.4307664 |
| 11/9/2013 4:10  | 0 | 264.4380792 | 264.4139728 | 264.411048 | 264.471664 | 264.4287664 |
| 11/9/2013 4:20  | 0 | 264.4374696 | 264.4119728 | 264.410048 | 264.469664 | 264.4277664 |
| 11/9/2013 4:30  | 0 | 264.43686   | 264.4139728 | 264.410048 | 264.471664 | 264.4267664 |
| 11/9/2013 4:40  | 0 | 264.4362504 | 264.4109728 | 264.410048 | 264.469664 | 264.4277664 |
| 11/9/2013 4:50  | 0 | 264.4356408 | 264.4079728 | 264.404048 | 264.467664 | 264.4247664 |
| 11/9/2013 5:00  | 0 | 264.435336  | 264.4069728 | 264.407048 | 264.469664 | 264.4247664 |
| 11/9/2013 5:10  | 0 | 264.4344216 | 264.4109728 | 264.408048 | 264.470664 | 264.4277664 |
| 11/9/2013 5:20  | 0 | 264.433812  | 264.4109728 | 264.407048 | 264.469664 | 264.4267664 |
| 11/9/2013 5:30  | 0 | 264.4335072 | 264.4079728 | 264.404048 | 264.469664 | 264.4257664 |
| 11/9/2013 5:40  | 0 | 264.4328976 | 264.4069728 | 264.403048 | 264.466664 | 264.4237664 |
| 11/9/2013 5:50  | 0 | 264.4328976 | 264.4069728 | 264.404048 | 264.468664 | 264.4257664 |
| 11/9/2013 6:00  | 0 | 264.4319832 | 264.4039728 | 264.403048 | 264.465664 | 264.4227664 |
| 11/9/2013 6:10  | 0 | 264.4313736 | 264.4079728 | 264.404048 | 264.466664 | 264.4217664 |
| 11/9/2013 6:20  | 0 | 264.430764  | 264.4049728 | 264.404048 | 264.464664 | 264.4237664 |
| 11/9/2013 6:30  | 0 | 264.4304592 | 264.4069728 | 264.403048 | 264.465664 | 264.4217664 |
| 11/9/2013 6:40  | 0 | 264.4301544 | 264.4069728 | 264.402048 | 264.468664 | 264.4237664 |
| 11/9/2013 6:50  | 0 | 264.4301544 | 264.4059728 | 264.401048 | 264.465664 | 264.4227664 |
| 11/9/2013 7:00  | 0 | 264.4295448 | 264.4059728 | 264.401048 | 264.464664 | 264.4217664 |
| 11/9/2013 7:10  | 0 | 264.42924   | 264.4039728 | 264.401048 | 264.464664 | 264.4227664 |
| 11/9/2013 7:20  | 0 | 264.42924   | 264.4039728 | 264.401048 | 264.464664 | 264.4217664 |
| 11/9/2013 7:30  | 0 | 264.4286304 | 264.4049728 | 264.400048 | 264.463664 | 264.4217664 |
| 11/9/2013 7:40  | 0 | 264.4283256 | 264.4029728 | 264.400048 | 264.462664 | 264.4207664 |
| 11/9/2013 7:50  | 0 | 264.4280208 | 264.4039728 | 264.397048 | 264.462664 | 264.4207664 |
| 11/9/2013 8:00  | 0 | 264.427716  | 264.4069728 | 264.398048 | 264.465664 | 264.4227664 |
| 11/9/2013 8:10  | 0 | 264.4274112 | 264.4039728 | 264.399048 | 264.462664 | 264.4197664 |
| 11/9/2013 8:20  | 0 | 264.4271064 | 264.4009728 | 264.397048 | 264.460664 | 264.4167664 |
| 11/9/2013 8:30  | 0 | 264.4274112 | 264.4029728 | 264.399048 | 264.464664 | 264.4187664 |
| 11/9/2013 8:40  | 0 | 264.4268016 | 264.4059728 | 264.402048 | 264.465664 | 264.4207664 |
| 11/9/2013 8:50  | 0 | 264.4268016 | 264.4069728 | 264.399048 | 264.463664 | 264.4217664 |
| 11/9/2013 9:00  | 0 | 264.4271064 | 264.4069728 | 264.400048 | 264.461664 | 264.4217664 |
| 11/9/2013 9:10  | 0 | 264.4280208 | 264.4089728 | 264.400048 | 264.463664 | 264.4217664 |
| 11/9/2013 9:20  | 0 | 264.4280208 | 264.4099728 | 264.402048 | 264.461664 | 264.4207664 |
| 11/9/2013 9:30  | 0 | 264.4295448 | 264.4129728 | 264.402048 | 264.459664 | 264.4207664 |
| 11/9/2013 9:40  | 0 | 264.4304592 | 264.4129728 | 264.406048 | 264.463664 | 264.4227664 |
| 11/9/2013 9:50  | 0 | 264.4304592 | 264.4179728 | 264.407048 | 264.463664 | 264.4247664 |
| 11/9/2013 10:00 | 0 | 264.4310688 | 264.4169728 | 264.408048 | 264.460664 | 264.4217664 |
| 11/9/2013 10:10 | 0 | 264.432288  | 264.4219728 | 264.411048 | 264.462664 | 264.4257664 |
| 11/9/2013 10:20 | 0 | 264.4335072 | 264.4219728 | 264.411048 | 264.459664 | 264.4247664 |
| 11/9/2013 10:30 | 0 | 264.435336  | 264.4219728 | 264.414048 | 264.461664 | 264.4247664 |
| 11/9/2013 10:40 | 0 | 264.4362504 | 264.4289728 | 264.415048 | 264.461664 | 264.4267664 |
| 11/9/2013 10:50 | 0 | 264.4392984 | 264.4329728 | 264.419048 | 264.460664 | 264.4287664 |
| 11/9/2013 11:00 | 0 | 264.4408224 | 264.4319728 | 264.419048 | 264.459664 | 264.4267664 |
| 11/9/2013 11:10 | 0 | 264.441432  | 264.4359728 | 264.424048 | 264.462664 | 264.4307664 |
| 11/9/2013 11:20 | 0 | 264.4426512 | 264.4279728 | 264.424048 | 264.458664 | 264.4287664 |
| 11/9/2013 11:30 | 0 | 264.442956  | 264.4379728 | 264.427048 | 264.459664 | 264.4327664 |

|                 |   |             |             |            |            |             |
|-----------------|---|-------------|-------------|------------|------------|-------------|
| 11/9/2013 11:40 | 0 | 264.4447848 | 264.4419728 | 264.428048 | 264.461664 | 264.4347664 |
| 11/9/2013 11:50 | 0 | 264.4472232 | 264.4419728 | 264.431048 | 264.456664 | 264.4337664 |
| 11/9/2013 12:00 | 0 | 264.4496616 | 264.4449728 | 264.432048 | 264.455664 | 264.4337664 |
| 11/9/2013 12:10 | 0 | 264.450576  | 264.4449728 | 264.433048 | 264.457664 | 264.4347664 |
| 11/9/2013 12:20 | 0 | 264.4524048 | 264.4449728 | 264.437048 | 264.459664 | 264.4357664 |
| 11/9/2013 12:30 | 0 | 264.4517952 | 264.4499728 | 264.437048 | 264.460664 | 264.4367664 |
| 11/9/2013 12:40 | 0 | 264.4521    | 264.4459728 | 264.440048 | 264.459664 | 264.4377664 |
| 11/9/2013 12:50 | 0 | 264.4533192 | 264.4449728 | 264.440048 | 264.459664 | 264.4377664 |
| 11/9/2013 13:00 | 0 | 264.4527096 | 264.4479728 | 264.440048 | 264.459664 | 264.4397664 |
| 11/9/2013 13:10 | 0 | 264.4527096 | 264.4439728 | 264.439048 | 264.458664 | 264.4347664 |
| 11/9/2013 13:20 | 0 | 264.4533192 | 264.4419728 | 264.439048 | 264.456664 | 264.4347664 |
| 11/9/2013 13:30 | 0 | 264.4524048 | 264.4519728 | 264.440048 | 264.456664 | 264.4387664 |
| 11/9/2013 13:40 | 0 | 264.4542336 | 264.4439728 | 264.440048 | 264.458664 | 264.4387664 |
| 11/9/2013 13:50 | 0 | 264.4533192 | 264.4389728 | 264.439048 | 264.459664 | 264.4377664 |
| 11/9/2013 14:00 | 0 | 264.4508808 | 264.4519728 | 264.437048 | 264.456664 | 264.4387664 |
| 11/9/2013 14:10 | 0 | 264.4542336 | 264.4519728 | 264.440048 | 264.457664 | 264.4377664 |
| 11/9/2013 14:20 | 0 | 264.4560624 | 264.4439728 | 264.441048 | 264.458664 | 264.4387664 |
| 11/9/2013 14:30 | 0 | 264.4539288 | 264.4469728 | 264.440048 | 264.458664 | 264.4397664 |
| 11/9/2013 14:40 | 0 | 264.4545384 | 264.4389728 | 264.440048 | 264.456664 | 264.4387664 |
| 11/9/2013 14:50 | 0 | 264.4527096 | 264.4389728 | 264.440048 | 264.456664 | 264.4387664 |
| 11/9/2013 15:00 | 0 | 264.4502712 | 264.4439728 | 264.437048 | 264.455664 | 264.4377664 |
| 11/9/2013 15:10 | 0 | 264.4521    | 264.4379728 | 264.437048 | 264.459664 | 264.4357664 |
| 11/9/2013 15:20 | 0 | 264.4514904 | 264.4389728 | 264.437048 | 264.455664 | 264.4357664 |
| 11/9/2013 15:30 | 0 | 264.4493568 | 264.4399728 | 264.434048 | 264.456664 | 264.4367664 |
| 11/9/2013 15:40 | 0 | 264.4484424 | 264.4389728 | 264.433048 | 264.456664 | 264.4337664 |
| 11/9/2013 15:50 | 0 | 264.4481376 | 264.4349728 | 264.433048 | 264.458664 | 264.4347664 |
| 11/9/2013 16:00 | 0 | 264.4487472 | 264.4319728 | 264.433048 | 264.456664 | 264.4337664 |
| 11/9/2013 16:10 | 0 | 264.446004  | 264.4379728 | 264.430048 | 264.458664 | 264.4347664 |
| 11/9/2013 16:20 | 0 | 264.4453944 | 264.4309728 | 264.430048 | 264.455664 | 264.4317664 |
| 11/9/2013 16:30 | 0 | 264.4450896 | 264.4309728 | 264.427048 | 264.455664 | 264.4327664 |
| 11/9/2013 16:40 | 0 | 264.4438704 | 264.4339728 | 264.429048 | 264.455664 | 264.4327664 |
| 11/9/2013 16:50 | 0 | 264.442956  | 264.4279728 | 264.425048 | 264.455664 | 264.4307664 |
| 11/9/2013 17:00 | 0 | 264.4432608 | 264.4259728 | 264.425048 | 264.457664 | 264.4307664 |
| 11/9/2013 17:10 | 0 | 264.4402128 | 264.4329728 | 264.422048 | 264.456664 | 264.4297664 |
| 11/9/2013 17:20 | 0 | 264.4426512 | 264.4279728 | 264.423048 | 264.455664 | 264.4297664 |
| 11/9/2013 17:30 | 0 | 264.4435656 | 264.4279728 | 264.426048 | 264.458664 | 264.4317664 |
| 11/9/2013 17:40 | 0 | 264.441432  | 264.4339728 | 264.425048 | 264.454664 | 264.4287664 |
| 11/9/2013 17:50 | 0 | 264.4417368 | 264.4309728 | 264.423048 | 264.454664 | 264.4307664 |
| 11/9/2013 18:00 | 0 | 264.442956  | 264.4279728 | 264.425048 | 264.456664 | 264.4297664 |
| 11/9/2013 18:10 | 0 | 264.4411272 | 264.4279728 | 264.426048 | 264.456664 | 264.4297664 |
| 11/9/2013 18:20 | 0 | 264.4405176 | 264.4329728 | 264.423048 | 264.455664 | 264.4297664 |
| 11/9/2013 18:30 | 0 | 264.4432608 | 264.4239728 | 264.425048 | 264.452664 | 264.4257664 |
| 11/9/2013 18:40 | 0 | 264.4408224 | 264.4299728 | 264.425048 | 264.456664 | 264.4307664 |
| 11/9/2013 18:50 | 0 | 264.4405176 | 264.4339728 | 264.427048 | 264.454664 | 264.4307664 |
| 11/9/2013 19:00 | 0 | 264.4417368 | 264.4309728 | 264.424048 | 264.457664 | 264.4297664 |
| 11/9/2013 19:10 | 0 | 264.441432  | 264.4279728 | 264.424048 | 264.454664 | 264.4267664 |
| 11/9/2013 19:20 | 0 | 264.4408224 | 264.4319728 | 264.423048 | 264.453664 | 264.4277664 |

|                 |   |             |             |            |            |             |
|-----------------|---|-------------|-------------|------------|------------|-------------|
| 11/9/2013 19:30 | 0 | 264.4417368 | 264.4289728 | 264.423048 | 264.453664 | 264.4277664 |
| 11/9/2013 19:40 | 0 | 264.4411272 | 264.4319728 | 264.426048 | 264.454664 | 264.4297664 |
| 11/9/2013 19:50 | 0 | 264.4405176 | 264.4309728 | 264.426048 | 264.454664 | 264.4287664 |
| 11/9/2013 20:00 | 0 | 264.4420416 | 264.4299728 | 264.425048 | 264.454664 | 264.4287664 |
| 11/9/2013 20:10 | 0 | 264.4417368 | 264.4299728 | 264.425048 | 264.455664 | 264.4287664 |
| 11/9/2013 20:20 | 0 | 264.4405176 | 264.4349728 | 264.427048 | 264.455664 | 264.4307664 |
| 11/9/2013 20:30 | 0 | 264.4408224 | 264.4289728 | 264.425048 | 264.455664 | 264.4307664 |
| 11/9/2013 20:40 | 0 | 264.4420416 | 264.4269728 | 264.425048 | 264.454664 | 264.4297664 |
| 11/9/2013 20:50 | 0 | 264.4411272 | 264.4329728 | 264.425048 | 264.453664 | 264.4317664 |
| 11/9/2013 21:00 | 0 | 264.439908  | 264.4359728 | 264.425048 | 264.454664 | 264.4317664 |
| 11/9/2013 21:10 | 0 | 264.4408224 | 264.4279728 | 264.425048 | 264.452664 | 264.4277664 |
| 11/9/2013 21:20 | 0 | 264.4405176 | 264.4279728 | 264.425048 | 264.452664 | 264.4287664 |
| 11/9/2013 21:30 | 0 | 264.4396032 | 264.4349728 | 264.424048 | 264.452664 | 264.4317664 |
| 11/9/2013 21:40 | 0 | 264.439908  | 264.4239728 | 264.422048 | 264.450664 | 264.4247664 |
| 11/9/2013 21:50 | 0 | 264.439908  | 264.4229728 | 264.422048 | 264.452664 | 264.4237664 |
| 11/9/2013 22:00 | 0 | 264.4389936 | 264.4279728 | 264.422048 | 264.450664 | 264.4267664 |
| 11/9/2013 22:10 | 0 | 264.4377744 | 264.4299728 | 264.423048 | 264.452664 | 264.4287664 |
| 11/9/2013 22:20 | 0 | 264.4396032 | 264.4249728 | 264.422048 | 264.451664 | 264.4247664 |
| 11/9/2013 22:30 | 0 | 264.439908  | 264.4219728 | 264.422048 | 264.450664 | 264.4247664 |
| 11/9/2013 22:40 | 0 | 264.4365552 | 264.4269728 | 264.422048 | 264.451664 | 264.4267664 |
| 11/9/2013 22:50 | 0 | 264.4371648 | 264.4229728 | 264.421048 | 264.450664 | 264.4237664 |
| 11/9/2013 23:00 | 0 | 264.43686   | 264.4249728 | 264.419048 | 264.453664 | 264.4257664 |
| 11/9/2013 23:10 | 0 | 264.4362504 | 264.4289728 | 264.421048 | 264.453664 | 264.4277664 |
| 11/9/2013 23:20 | 0 | 264.4371648 | 264.4199728 | 264.419048 | 264.451664 | 264.4247664 |
| 11/9/2013 23:30 | 0 | 264.4362504 | 264.4229728 | 264.419048 | 264.451664 | 264.4247664 |
| 11/9/2013 23:40 | 0 | 264.435336  | 264.4249728 | 264.418048 | 264.450664 | 264.4227664 |
| 11/9/2013 23:50 | 0 | 264.435336  | 264.4219728 | 264.419048 | 264.449664 | 264.4217664 |
| 11/10/2013 0:00 | 0 | 264.4359456 | 264.4209728 | 264.419048 | 264.450664 | 264.4237664 |
| 11/10/2013 0:10 | 0 | 264.4350312 | 264.4219728 | 264.419048 | 264.452664 | 264.4247664 |
| 11/10/2013 0:20 | 0 | 264.4344216 | 264.4209728 | 264.417048 | 264.451664 | 264.4237664 |
| 11/10/2013 0:30 | 0 | 264.4341168 | 264.4209728 | 264.417048 | 264.449664 | 264.4217664 |
| 11/10/2013 0:40 | 0 | 264.4332024 | 264.4189728 | 264.416048 | 264.449664 | 264.4207664 |
| 11/10/2013 0:50 | 0 | 264.432288  | 264.4209728 | 264.416048 | 264.448664 | 264.4227664 |
| 11/10/2013 1:00 | 0 | 264.432288  | 264.4159728 | 264.415048 | 264.448664 | 264.4207664 |
| 11/10/2013 1:10 | 0 | 264.4319832 | 264.4149728 | 264.413048 | 264.448664 | 264.4207664 |
| 11/10/2013 1:20 | 0 | 264.4310688 | 264.4169728 | 264.413048 | 264.449664 | 264.4197664 |
| 11/10/2013 1:30 | 0 | 264.430764  | 264.4139728 | 264.413048 | 264.449664 | 264.4197664 |
| 11/10/2013 1:40 | 0 | 264.4304592 | 264.4139728 | 264.412048 | 264.449664 | 264.4197664 |
| 11/10/2013 1:50 | 0 | 264.4298496 | 264.4139728 | 264.412048 | 264.448664 | 264.4187664 |
| 11/10/2013 2:00 | 0 | 264.42924   | 264.4139728 | 264.410048 | 264.446664 | 264.4187664 |
| 11/10/2013 2:10 | 0 | 264.42924   | 264.4129728 | 264.410048 | 264.446664 | 264.4187664 |
| 11/10/2013 2:20 | 0 | 264.4283256 | 264.4109728 | 264.408048 | 264.448664 | 264.4177664 |
| 11/10/2013 2:30 | 0 | 264.427716  | 264.4099728 | 264.408048 | 264.447664 | 264.4167664 |
| 11/10/2013 2:40 | 0 | 264.4271064 | 264.4089728 | 264.406048 | 264.446664 | 264.4167664 |
| 11/10/2013 2:50 | 0 | 264.4268016 | 264.4069728 | 264.406048 | 264.448664 | 264.4167664 |
| 11/10/2013 3:00 | 0 | 264.4268016 | 264.4069728 | 264.405048 | 264.448664 | 264.4147664 |
| 11/10/2013 3:10 | 0 | 264.4255824 | 264.4089728 | 264.406048 | 264.449664 | 264.4187664 |

|                  |   |             |             |            |            |             |
|------------------|---|-------------|-------------|------------|------------|-------------|
| 11/10/2013 3:20  | 0 | 264.4252776 | 264.4059728 | 264.402048 | 264.447664 | 264.4137664 |
| 11/10/2013 3:30  | 0 | 264.424668  | 264.4039728 | 264.402048 | 264.447664 | 264.4137664 |
| 11/10/2013 3:40  | 0 | 264.4240584 | 264.4019728 | 264.401048 | 264.447664 | 264.4137664 |
| 11/10/2013 3:50  | 0 | 264.4240584 | 264.4009728 | 264.401048 | 264.447664 | 264.4127664 |
| 11/10/2013 4:00  | 0 | 264.423144  | 264.3989728 | 264.399048 | 264.445664 | 264.4127664 |
| 11/10/2013 4:10  | 0 | 264.4225344 | 264.3989728 | 264.401048 | 264.445664 | 264.4127664 |
| 11/10/2013 4:20  | 0 | 264.4222296 | 264.3979728 | 264.398048 | 264.444664 | 264.4127664 |
| 11/10/2013 4:30  | 0 | 264.42162   | 264.3979728 | 264.398048 | 264.444664 | 264.4107664 |
| 11/10/2013 4:40  | 0 | 264.4210104 | 264.3999728 | 264.397048 | 264.446664 | 264.4127664 |
| 11/10/2013 4:50  | 0 | 264.4204008 | 264.3999728 | 264.395048 | 264.446664 | 264.4127664 |
| 11/10/2013 5:00  | 0 | 264.4197912 | 264.4009728 | 264.397048 | 264.445664 | 264.4127664 |
| 11/10/2013 5:10  | 0 | 264.4197912 | 264.3959728 | 264.395048 | 264.444664 | 264.4107664 |
| 11/10/2013 5:20  | 0 | 264.4194864 | 264.3969728 | 264.395048 | 264.445664 | 264.4087664 |
| 11/10/2013 5:30  | 0 | 264.4188768 | 264.3969728 | 264.397048 | 264.447664 | 264.4117664 |
| 11/10/2013 5:40  | 0 | 264.4188768 | 264.3969728 | 264.394048 | 264.445664 | 264.4087664 |
| 11/10/2013 5:50  | 0 | 264.4182672 | 264.3979728 | 264.395048 | 264.444664 | 264.4107664 |
| 11/10/2013 6:00  | 0 | 264.4179624 | 264.3959728 | 264.393048 | 264.442664 | 264.4087664 |
| 11/10/2013 6:10  | 0 | 264.4173528 | 264.3959728 | 264.394048 | 264.444664 | 264.4087664 |
| 11/10/2013 6:20  | 0 | 264.4173528 | 264.3939728 | 264.391048 | 264.444664 | 264.4077664 |
| 11/10/2013 6:30  | 0 | 264.417048  | 264.3929728 | 264.393048 | 264.444664 | 264.4077664 |
| 11/10/2013 6:40  | 0 | 264.4161336 | 264.3929728 | 264.391048 | 264.443664 | 264.4077664 |
| 11/10/2013 6:50  | 0 | 264.4161336 | 264.3949728 | 264.394048 | 264.443664 | 264.4077664 |
| 11/10/2013 7:00  | 0 | 264.4158288 | 264.3949728 | 264.392048 | 264.442664 | 264.4087664 |
| 11/10/2013 7:10  | 0 | 264.4158288 | 264.3949728 | 264.392048 | 264.442664 | 264.4087664 |
| 11/10/2013 7:20  | 0 | 264.415524  | 264.3919728 | 264.391048 | 264.441664 | 264.4057664 |
| 11/10/2013 7:30  | 0 | 264.4152192 | 264.3969728 | 264.392048 | 264.444664 | 264.4087664 |
| 11/10/2013 7:40  | 0 | 264.4152192 | 264.3939728 | 264.391048 | 264.439664 | 264.4057664 |
| 11/10/2013 7:50  | 0 | 264.4149144 | 264.3939728 | 264.392048 | 264.441664 | 264.4077664 |
| 11/10/2013 8:00  | 0 | 264.4146096 | 264.3939728 | 264.392048 | 264.441664 | 264.4077664 |
| 11/10/2013 8:10  | 0 | 264.4146096 | 264.3949728 | 264.389048 | 264.440664 | 264.4047664 |
| 11/10/2013 8:20  | 0 | 264.4146096 | 264.3949728 | 264.391048 | 264.439664 | 264.4047664 |
| 11/10/2013 8:30  | 0 | 264.4149144 | 264.3929728 | 264.391048 | 264.439664 | 264.4057664 |
| 11/10/2013 8:40  | 0 | 264.4146096 | 264.3959728 | 264.391048 | 264.437664 | 264.4057664 |
| 11/10/2013 8:50  | 0 | 264.4149144 | 264.3979728 | 264.392048 | 264.441664 | 264.4057664 |
| 11/10/2013 9:00  | 0 | 264.4152192 | 264.3969728 | 264.394048 | 264.441664 | 264.4067664 |
| 11/10/2013 9:10  | 0 | 264.415524  | 264.3949728 | 264.393048 | 264.440664 | 264.4047664 |
| 11/10/2013 9:20  | 0 | 264.4158288 | 264.3989728 | 264.393048 | 264.442664 | 264.4057664 |
| 11/10/2013 9:30  | 0 | 264.4164384 | 264.4009728 | 264.394048 | 264.439664 | 264.4067664 |
| 11/10/2013 9:40  | 0 | 264.417048  | 264.4019728 | 264.396048 | 264.442664 | 264.4067664 |
| 11/10/2013 9:50  | 0 | 264.4173528 | 264.4049728 | 264.394048 | 264.436664 | 264.4057664 |
| 11/10/2013 10:00 | 0 | 264.4191816 | 264.4089728 | 264.398048 | 264.439664 | 264.4087664 |
| 11/10/2013 10:10 | 0 | 264.42162   | 264.4119728 | 264.401048 | 264.438664 | 264.4097664 |
| 11/10/2013 10:20 | 0 | 264.423144  | 264.4139728 | 264.404048 | 264.438664 | 264.4107664 |
| 11/10/2013 10:30 | 0 | 264.4240584 | 264.4119728 | 264.405048 | 264.438664 | 264.4097664 |
| 11/10/2013 10:40 | 0 | 264.4252776 | 264.4149728 | 264.407048 | 264.441664 | 264.4147664 |
| 11/10/2013 10:50 | 0 | 264.4264968 | 264.4149728 | 264.408048 | 264.437664 | 264.4117664 |
| 11/10/2013 11:00 | 0 | 264.427716  | 264.4189728 | 264.408048 | 264.438664 | 264.4127664 |

|                  |   |             |             |            |            |             |
|------------------|---|-------------|-------------|------------|------------|-------------|
| 11/10/2013 11:10 | 0 | 264.42924   | 264.4279728 | 264.412048 | 264.436664 | 264.4177664 |
| 11/10/2013 11:20 | 0 | 264.4328976 | 264.4279728 | 264.416048 | 264.438664 | 264.4177664 |
| 11/10/2013 11:30 | 0 | 264.4344216 | 264.4319728 | 264.420048 | 264.437664 | 264.4187664 |
| 11/10/2013 11:40 | 0 | 264.4362504 | 264.4339728 | 264.422048 | 264.437664 | 264.4207664 |
| 11/10/2013 11:50 | 0 | 264.438384  | 264.4339728 | 264.426048 | 264.435664 | 264.4207664 |
| 11/10/2013 12:00 | 0 | 264.4389936 | 264.4389728 | 264.427048 | 264.435664 | 264.4217664 |
| 11/10/2013 12:10 | 0 | 264.439908  | 264.4379728 | 264.427048 | 264.439664 | 264.4227664 |
| 11/10/2013 12:20 | 0 | 264.4423464 | 264.4369728 | 264.430048 | 264.437664 | 264.4247664 |
| 11/10/2013 12:30 | 0 | 264.4432608 | 264.4389728 | 264.431048 | 264.436664 | 264.4267664 |
| 11/10/2013 12:40 | 0 | 264.4438704 | 264.4439728 | 264.434048 | 264.436664 | 264.4267664 |
| 11/10/2013 12:50 | 0 | 264.4450896 | 264.4419728 | 264.434048 | 264.437664 | 264.4267664 |
| 11/10/2013 13:00 | 0 | 264.4450896 | 264.4459728 | 264.436048 | 264.439664 | 264.4307664 |
| 11/10/2013 13:10 | 0 | 264.4463088 | 264.4429728 | 264.436048 | 264.439664 | 264.4297664 |
| 11/10/2013 13:20 | 0 | 264.4472232 | 264.4459728 | 264.437048 | 264.440664 | 264.4297664 |
| 11/10/2013 13:30 | 0 | 264.4469184 | 264.4449728 | 264.436048 | 264.438664 | 264.4297664 |
| 11/10/2013 13:40 | 0 | 264.447528  | 264.4429728 | 264.437048 | 264.439664 | 264.4307664 |
| 11/10/2013 13:50 | 0 | 264.4478328 | 264.4429728 | 264.439048 | 264.437664 | 264.4327664 |
| 11/10/2013 14:00 | 0 | 264.4484424 | 264.4429728 | 264.437048 | 264.437664 | 264.4307664 |
| 11/10/2013 14:10 | 0 | 264.4484424 | 264.4379728 | 264.436048 | 264.438664 | 264.4297664 |
| 11/10/2013 14:20 | 0 | 264.4463088 | 264.4459728 | 264.438048 | 264.438664 | 264.4307664 |
| 11/10/2013 14:30 | 0 | 264.4469184 | 264.4419728 | 264.436048 | 264.438664 | 264.4307664 |
| 11/10/2013 14:40 | 0 | 264.4466136 | 264.4309728 | 264.432048 | 264.436664 | 264.4277664 |
| 11/10/2013 14:50 | 0 | 264.4456992 | 264.4369728 | 264.434048 | 264.434664 | 264.4297664 |
| 11/10/2013 15:00 | 0 | 264.4447848 | 264.4389728 | 264.434048 | 264.435664 | 264.4307664 |
| 11/10/2013 15:10 | 0 | 264.4450896 | 264.4349728 | 264.432048 | 264.436664 | 264.4277664 |
| 11/10/2013 15:20 | 0 | 264.4453944 | 264.4379728 | 264.434048 | 264.436664 | 264.4297664 |
| 11/10/2013 15:30 | 0 | 264.4438704 | 264.4409728 | 264.431048 | 264.436664 | 264.4307664 |
| 11/10/2013 15:40 | 0 | 264.4447848 | 264.4429728 | 264.431048 | 264.434664 | 264.4277664 |
| 11/10/2013 15:50 | 0 | 264.44448   | 264.4339728 | 264.430048 | 264.435664 | 264.4257664 |
| 11/10/2013 16:00 | 0 | 264.4432608 | 264.4389728 | 264.431048 | 264.436664 | 264.4297664 |
| 11/10/2013 16:10 | 0 | 264.4420416 | 264.4269728 | 264.427048 | 264.436664 | 264.4237664 |
| 11/10/2013 16:20 | 0 | 264.441432  | 264.4369728 | 264.427048 | 264.436664 | 264.4257664 |
| 11/10/2013 16:30 | 0 | 264.4408224 | 264.4299728 | 264.426048 | 264.435664 | 264.4257664 |
| 11/10/2013 16:40 | 0 | 264.4417368 | 264.4249728 | 264.425048 | 264.432664 | 264.4247664 |
| 11/10/2013 16:50 | 0 | 264.4402128 | 264.4319728 | 264.426048 | 264.435664 | 264.4257664 |
| 11/10/2013 17:00 | 0 | 264.4392984 | 264.4349728 | 264.428048 | 264.437664 | 264.4257664 |
| 11/10/2013 17:10 | 0 | 264.4396032 | 264.4249728 | 264.425048 | 264.437664 | 264.4237664 |
| 11/10/2013 17:20 | 0 | 264.4386888 | 264.4369728 | 264.426048 | 264.438664 | 264.4287664 |
| 11/10/2013 17:30 | 0 | 264.438384  | 264.4239728 | 264.424048 | 264.434664 | 264.4237664 |
| 11/10/2013 17:40 | 0 | 264.438384  | 264.4229728 | 264.422048 | 264.434664 | 264.4247664 |
| 11/10/2013 17:50 | 0 | 264.4365552 | 264.4309728 | 264.421048 | 264.433664 | 264.4237664 |
| 11/10/2013 18:00 | 0 | 264.4377744 | 264.4219728 | 264.421048 | 264.437664 | 264.4247664 |
| 11/10/2013 18:10 | 0 | 264.4374696 | 264.4219728 | 264.423048 | 264.437664 | 264.4227664 |
| 11/10/2013 18:20 | 0 | 264.4359456 | 264.4299728 | 264.421048 | 264.437664 | 264.4237664 |
| 11/10/2013 18:30 | 0 | 264.4362504 | 264.4279728 | 264.422048 | 264.436664 | 264.4217664 |
| 11/10/2013 18:40 | 0 | 264.4362504 | 264.4229728 | 264.421048 | 264.436664 | 264.4207664 |
| 11/10/2013 18:50 | 0 | 264.4365552 | 264.4209728 | 264.422048 | 264.437664 | 264.4217664 |

|                  |   |             |             |            |            |             |
|------------------|---|-------------|-------------|------------|------------|-------------|
| 11/10/2013 19:00 | 0 | 264.4347264 | 264.4309728 | 264.420048 | 264.434664 | 264.4237664 |
| 11/10/2013 19:10 | 0 | 264.4359456 | 264.4239728 | 264.420048 | 264.439664 | 264.4207664 |
| 11/10/2013 19:20 | 0 | 264.4371648 | 264.4279728 | 264.420048 | 264.437664 | 264.4227664 |
| 11/10/2013 19:30 | 0 | 264.43686   | 264.4239728 | 264.420048 | 264.435664 | 264.4207664 |
| 11/10/2013 19:40 | 0 | 264.4371648 | 264.4219728 | 264.422048 | 264.437664 | 264.4207664 |
| 11/10/2013 19:50 | 0 | 264.4362504 | 264.4299728 | 264.422048 | 264.436664 | 264.4237664 |
| 11/10/2013 20:00 | 0 | 264.435336  | 264.4269728 | 264.422048 | 264.436664 | 264.4237664 |
| 11/10/2013 20:10 | 0 | 264.4371648 | 264.4259728 | 264.422048 | 264.435664 | 264.4247664 |
| 11/10/2013 20:20 | 0 | 264.4362504 | 264.4249728 | 264.419048 | 264.434664 | 264.4217664 |
| 11/10/2013 20:30 | 0 | 264.438384  | 264.4259728 | 264.423048 | 264.435664 | 264.4247664 |
| 11/10/2013 20:40 | 0 | 264.4362504 | 264.4339728 | 264.422048 | 264.434664 | 264.4237664 |
| 11/10/2013 20:50 | 0 | 264.4380792 | 264.4269728 | 264.425048 | 264.434664 | 264.4237664 |
| 11/10/2013 21:00 | 0 | 264.4380792 | 264.4349728 | 264.426048 | 264.433664 | 264.4267664 |
| 11/10/2013 21:10 | 0 | 264.4396032 | 264.4269728 | 264.426048 | 264.435664 | 264.4267664 |
| 11/10/2013 21:20 | 0 | 264.4389936 | 264.4319728 | 264.429048 | 264.436664 | 264.4277664 |
| 11/10/2013 21:30 | 0 | 264.4386888 | 264.4319728 | 264.428048 | 264.433664 | 264.4247664 |
| 11/10/2013 21:40 | 0 | 264.4396032 | 264.4329728 | 264.428048 | 264.436664 | 264.4247664 |
| 11/10/2013 21:50 | 0 | 264.4392984 | 264.4379728 | 264.426048 | 264.433664 | 264.4267664 |
| 11/10/2013 22:00 | 0 | 264.4405176 | 264.4329728 | 264.426048 | 264.435664 | 264.4247664 |
| 11/10/2013 22:10 | 0 | 264.4417368 | 264.4299728 | 264.428048 | 264.435664 | 264.4277664 |
| 11/10/2013 22:20 | 0 | 264.4411272 | 264.4359728 | 264.429048 | 264.434664 | 264.4297664 |
| 11/10/2013 22:30 | 0 | 264.4408224 | 264.4389728 | 264.430048 | 264.434664 | 264.4287664 |
| 11/10/2013 22:40 | 0 | 264.4417368 | 264.4309728 | 264.428048 | 264.432664 | 264.4277664 |
| 11/10/2013 22:50 | 0 | 264.4420416 | 264.4259728 | 264.428048 | 264.433664 | 264.4247664 |
| 11/10/2013 23:00 | 0 | 264.4411272 | 264.4389728 | 264.431048 | 264.435664 | 264.4297664 |
| 11/10/2013 23:10 | 0 | 264.4402128 | 264.4369728 | 264.429048 | 264.435664 | 264.4287664 |
| 11/10/2013 23:20 | 0 | 264.4423464 | 264.4279728 | 264.429048 | 264.433664 | 264.4257664 |
| 11/10/2013 23:30 | 0 | 264.4408224 | 264.4329728 | 264.428048 | 264.433664 | 264.4257664 |
| 11/10/2013 23:40 | 0 | 264.4408224 | 264.4399728 | 264.431048 | 264.436664 | 264.4297664 |
| 11/10/2013 23:50 | 0 | 264.4402128 | 264.4339728 | 264.428048 | 264.435664 | 264.4287664 |
| 11/11/2013 0:00  | 0 | 264.4408224 | 264.4259728 | 264.427048 | 264.433664 | 264.4247664 |
| 11/11/2013 0:10  | 0 | 264.4405176 | 264.4299728 | 264.431048 | 264.434664 | 264.4277664 |
| 11/11/2013 0:20  | 0 | 264.4380792 | 264.4349728 | 264.427048 | 264.436664 | 264.4257664 |
| 11/11/2013 0:30  | 0 | 264.438384  | 264.4229728 | 264.425048 | 264.435664 | 264.4237664 |
| 11/11/2013 0:40  | 0 | 264.4377744 | 264.4309728 | 264.427048 | 264.437664 | 264.4257664 |
| 11/11/2013 0:50  | 0 | 264.4365552 | 264.4289728 | 264.423048 | 264.435664 | 264.4237664 |
| 11/11/2013 1:00  | 0 | 264.4371648 | 264.4159728 | 264.422048 | 264.436664 | 264.4217664 |
| 11/11/2013 1:10  | 0 | 264.4325928 | 264.4219728 | 264.420048 | 264.435664 | 264.4247664 |
| 11/11/2013 1:20  | 0 | 264.4328976 | 264.4169728 | 264.416048 | 264.433664 | 264.4207664 |
| 11/11/2013 1:30  | 0 | 264.432288  | 264.4169728 | 264.418048 | 264.434664 | 264.4217664 |
| 11/11/2013 1:40  | 0 | 264.4310688 | 264.4179728 | 264.416048 | 264.433664 | 264.4197664 |
| 11/11/2013 1:50  | 0 | 264.4295448 | 264.4149728 | 264.414048 | 264.431664 | 264.4167664 |
| 11/11/2013 2:00  | 0 | 264.4298496 | 264.4119728 | 264.411048 | 264.430664 | 264.4157664 |
| 11/11/2013 2:10  | 0 | 264.427716  | 264.4139728 | 264.410048 | 264.430664 | 264.4177664 |
| 11/11/2013 2:20  | 0 | 264.4280208 | 264.4079728 | 264.411048 | 264.434664 | 264.4167664 |
| 11/11/2013 2:30  | 0 | 264.4255824 | 264.4059728 | 264.407048 | 264.433664 | 264.4137664 |
| 11/11/2013 2:40  | 0 | 264.424668  | 264.4069728 | 264.407048 | 264.433664 | 264.4117664 |

|                  |   |             |             |            |            |             |
|------------------|---|-------------|-------------|------------|------------|-------------|
| 11/11/2013 2:50  | 0 | 264.4237536 | 264.4069728 | 264.407048 | 264.433664 | 264.4137664 |
| 11/11/2013 3:00  | 0 | 264.4228392 | 264.4049728 | 264.404048 | 264.431664 | 264.4117664 |
| 11/11/2013 3:10  | 0 | 264.42162   | 264.4029728 | 264.403048 | 264.432664 | 264.4107664 |
| 11/11/2013 3:20  | 0 | 264.4204008 | 264.4029728 | 264.403048 | 264.431664 | 264.4107664 |
| 11/11/2013 3:30  | 0 | 264.4191816 | 264.4019728 | 264.402048 | 264.432664 | 264.4117664 |
| 11/11/2013 3:40  | 0 | 264.418572  | 264.3989728 | 264.399048 | 264.431664 | 264.4087664 |
| 11/11/2013 3:50  | 0 | 264.4176576 | 264.3989728 | 264.398048 | 264.431664 | 264.4087664 |
| 11/11/2013 4:00  | 0 | 264.4167432 | 264.4009728 | 264.398048 | 264.433664 | 264.4067664 |
| 11/11/2013 4:10  | 0 | 264.4158288 | 264.3979728 | 264.396048 | 264.431664 | 264.4057664 |
| 11/11/2013 4:20  | 0 | 264.4152192 | 264.3969728 | 264.395048 | 264.429664 | 264.4047664 |
| 11/11/2013 4:30  | 0 | 264.4149144 | 264.3939728 | 264.394048 | 264.430664 | 264.4037664 |
| 11/11/2013 4:40  | 0 | 264.4143048 | 264.3959728 | 264.392048 | 264.429664 | 264.4047664 |
| 11/11/2013 4:50  | 0 | 264.414     | 264.3969728 | 264.394048 | 264.432664 | 264.4057664 |
| 11/11/2013 5:00  | 0 | 264.4133904 | 264.3929728 | 264.393048 | 264.430664 | 264.4037664 |
| 11/11/2013 5:10  | 0 | 264.4130856 | 264.3959728 | 264.394048 | 264.431664 | 264.4057664 |
| 11/11/2013 5:20  | 0 | 264.4130856 | 264.3939728 | 264.391048 | 264.429664 | 264.4047664 |
| 11/11/2013 5:30  | 0 | 264.4127808 | 264.3949728 | 264.391048 | 264.428664 | 264.4037664 |
| 11/11/2013 5:40  | 0 | 264.4121712 | 264.3939728 | 264.390048 | 264.429664 | 264.4007664 |
| 11/11/2013 5:50  | 0 | 264.4118664 | 264.3939728 | 264.391048 | 264.429664 | 264.4027664 |
| 11/11/2013 6:00  | 0 | 264.4115616 | 264.3939728 | 264.391048 | 264.429664 | 264.4027664 |
| 11/11/2013 6:10  | 0 | 264.4112568 | 264.3939728 | 264.391048 | 264.431664 | 264.4047664 |
| 11/11/2013 6:20  | 0 | 264.410952  | 264.3909728 | 264.390048 | 264.429664 | 264.4017664 |
| 11/11/2013 6:30  | 0 | 264.4106472 | 264.3919728 | 264.390048 | 264.429664 | 264.4027664 |
| 11/11/2013 6:40  | 0 | 264.4103424 | 264.3899728 | 264.388048 | 264.426664 | 264.4017664 |
| 11/11/2013 6:50  | 0 | 264.4103424 | 264.3929728 | 264.389048 | 264.427664 | 264.4027664 |
| 11/11/2013 7:00  | 0 | 264.4097328 | 264.3949728 | 264.389048 | 264.430664 | 264.4027664 |
| 11/11/2013 7:10  | 0 | 264.4100376 | 264.3909728 | 264.388048 | 264.429664 | 264.3987664 |
| 11/11/2013 7:20  | 0 | 264.409428  | 264.3959728 | 264.389048 | 264.429664 | 264.4027664 |
| 11/11/2013 7:30  | 0 | 264.409428  | 264.3939728 | 264.389048 | 264.429664 | 264.4017664 |
| 11/11/2013 7:40  | 0 | 264.4097328 | 264.3939728 | 264.389048 | 264.426664 | 264.4007664 |
| 11/11/2013 7:50  | 0 | 264.4097328 | 264.3939728 | 264.388048 | 264.426664 | 264.3997664 |
| 11/11/2013 8:00  | 0 | 264.4097328 | 264.3929728 | 264.389048 | 264.425664 | 264.3977664 |
| 11/11/2013 8:10  | 0 | 264.4103424 | 264.3969728 | 264.389048 | 264.427664 | 264.3997664 |
| 11/11/2013 8:20  | 0 | 264.410952  | 264.3979728 | 264.390048 | 264.427664 | 264.4007664 |
| 11/11/2013 8:30  | 0 | 264.412476  | 264.3989728 | 264.393048 | 264.426664 | 264.4007664 |
| 11/11/2013 8:40  | 0 | 264.4130856 | 264.4049728 | 264.395048 | 264.428664 | 264.4037664 |
| 11/11/2013 8:50  | 0 | 264.4146096 | 264.4089728 | 264.396048 | 264.427664 | 264.4047664 |
| 11/11/2013 9:00  | 0 | 264.4167432 | 264.4089728 | 264.396048 | 264.422664 | 264.4037664 |
| 11/11/2013 9:10  | 0 | 264.4191816 | 264.4129728 | 264.400048 | 264.425664 | 264.4057664 |
| 11/11/2013 9:20  | 0 | 264.42162   | 264.4189728 | 264.404048 | 264.428664 | 264.4067664 |
| 11/11/2013 9:30  | 0 | 264.424668  | 264.4239728 | 264.409048 | 264.426664 | 264.4117664 |
| 11/11/2013 9:40  | 0 | 264.4274112 | 264.4259728 | 264.415048 | 264.424664 | 264.4117664 |
| 11/11/2013 9:50  | 0 | 264.4295448 | 264.4269728 | 264.416048 | 264.424664 | 264.4117664 |
| 11/11/2013 10:00 | 0 | 264.4304592 | 264.4199728 | 264.419048 | 264.423664 | 264.4117664 |
| 11/11/2013 10:10 | 0 | 264.4289352 | 264.4249728 | 264.417048 | 264.428664 | 264.4097664 |
| 11/11/2013 10:20 | 0 | 264.4325928 | 264.4329728 | 264.420048 | 264.424664 | 264.4157664 |
| 11/11/2013 10:30 | 0 | 264.4359456 | 264.4329728 | 264.426048 | 264.428664 | 264.4187664 |

|                  |   |             |             |            |            |             |
|------------------|---|-------------|-------------|------------|------------|-------------|
| 11/11/2013 10:40 | 0 | 264.433812  | 264.4359728 | 264.425048 | 264.428664 | 264.4167664 |
| 11/11/2013 10:50 | 0 | 264.4374696 | 264.4359728 | 264.427048 | 264.425664 | 264.4187664 |
| 11/11/2013 11:00 | 0 | 264.4389936 | 264.4459728 | 264.429048 | 264.425664 | 264.4227664 |
| 11/11/2013 11:10 | 0 | 264.4417368 | 264.4449728 | 264.432048 | 264.428664 | 264.4227664 |
| 11/11/2013 11:20 | 0 | 264.4435656 | 264.4369728 | 264.433048 | 264.425664 | 264.4217664 |
| 11/11/2013 11:30 | 0 | 264.4423464 | 264.4379728 | 264.434048 | 264.426664 | 264.4227664 |
| 11/11/2013 11:40 | 0 | 264.439908  | 264.4399728 | 264.433048 | 264.428664 | 264.4227664 |
| 11/11/2013 11:50 | 0 | 264.4402128 | 264.4339728 | 264.429048 | 264.423664 | 264.4197664 |
| 11/11/2013 12:00 | 0 | 264.439908  | 264.4249728 | 264.429048 | 264.428664 | 264.4217664 |
| 11/11/2013 12:10 | 0 | 264.4365552 | 264.4259728 | 264.428048 | 264.427664 | 264.4167664 |
| 11/11/2013 12:20 | 0 | 264.4347264 | 264.4219728 | 264.422048 | 264.424664 | 264.4137664 |
| 11/11/2013 12:30 | 0 | 264.4341168 | 264.4299728 | 264.425048 | 264.430664 | 264.4197664 |
| 11/11/2013 12:40 | 0 | 264.4350312 | 264.4269728 | 264.423048 | 264.425664 | 264.4167664 |
| 11/11/2013 12:50 | 0 | 264.4335072 | 264.4249728 | 264.422048 | 264.425664 | 264.4167664 |
| 11/11/2013 13:00 | 0 | 264.4328976 | 264.4119728 | 264.418048 | 264.424664 | 264.4117664 |
| 11/11/2013 13:10 | 0 | 264.4304592 | 264.4159728 | 264.416048 | 264.425664 | 264.4127664 |
| 11/11/2013 13:20 | 0 | 264.42924   | 264.4199728 | 264.418048 | 264.424664 | 264.4137664 |
| 11/11/2013 13:30 | 0 | 264.42924   | 264.4199728 | 264.416048 | 264.424664 | 264.4137664 |
| 11/11/2013 13:40 | 0 | 264.4280208 | 264.4079728 | 264.412048 | 264.423664 | 264.4067664 |
| 11/11/2013 13:50 | 0 | 264.4249728 | 264.4039728 | 264.409048 | 264.422664 | 264.4067664 |
| 11/11/2013 14:00 | 0 | 264.4243632 | 264.4139728 | 264.408048 | 264.425664 | 264.4107664 |
| 11/11/2013 14:10 | 0 | 264.4252776 | 264.4139728 | 264.409048 | 264.424664 | 264.4137664 |
| 11/11/2013 14:20 | 0 | 264.4255824 | 264.4209728 | 264.413048 | 264.426664 | 264.4137664 |
| 11/11/2013 14:30 | 0 | 264.426192  | 264.4179728 | 264.409048 | 264.424664 | 264.4097664 |
| 11/11/2013 14:40 | 0 | 264.4264968 | 264.4199728 | 264.411048 | 264.426664 | 264.4117664 |
| 11/11/2013 14:50 | 0 | 264.4271064 | 264.4169728 | 264.412048 | 264.427664 | 264.4097664 |
| 11/11/2013 15:00 | 0 | 264.4271064 | 264.4179728 | 264.413048 | 264.424664 | 264.4117664 |
| 11/11/2013 15:10 | 0 | 264.4268016 | 264.4169728 | 264.413048 | 264.425664 | 264.4107664 |
| 11/11/2013 15:20 | 0 | 264.426192  | 264.4209728 | 264.413048 | 264.422664 | 264.4107664 |
| 11/11/2013 15:30 | 0 | 264.4264968 | 264.4209728 | 264.413048 | 264.424664 | 264.4107664 |
| 11/11/2013 15:40 | 0 | 264.4264968 | 264.4159728 | 264.412048 | 264.424664 | 264.4097664 |
| 11/11/2013 15:50 | 0 | 264.4268016 | 264.4159728 | 264.414048 | 264.428664 | 264.4117664 |
| 11/11/2013 16:00 | 0 | 264.426192  | 264.4129728 | 264.413048 | 264.425664 | 264.4097664 |
| 11/11/2013 16:10 | 0 | 264.4252776 | 264.4139728 | 264.410048 | 264.420664 | 264.4087664 |
| 11/11/2013 16:20 | 0 | 264.4249728 | 264.4139728 | 264.411048 | 264.424664 | 264.4097664 |
| 11/11/2013 16:30 | 0 | 264.4243632 | 264.4169728 | 264.413048 | 264.424664 | 264.4097664 |
| 11/11/2013 16:40 | 0 | 264.424668  | 264.4109728 | 264.411048 | 264.423664 | 264.4087664 |
| 11/11/2013 16:50 | 0 | 264.424668  | 264.4089728 | 264.408048 | 264.422664 | 264.4077664 |
| 11/11/2013 17:00 | 0 | 264.4240584 | 264.4149728 | 264.410048 | 264.426664 | 264.4087664 |
| 11/11/2013 17:10 | 0 | 264.423144  | 264.4109728 | 264.408048 | 264.425664 | 264.4097664 |
| 11/11/2013 17:20 | 0 | 264.4225344 | 264.4109728 | 264.407048 | 264.424664 | 264.4067664 |
| 11/11/2013 17:30 | 0 | 264.423144  | 264.4209728 | 264.410048 | 264.424664 | 264.4107664 |
| 11/11/2013 17:40 | 0 | 264.424668  | 264.4179728 | 264.411048 | 264.423664 | 264.4077664 |
| 11/11/2013 17:50 | 0 | 264.4249728 | 264.4119728 | 264.408048 | 264.421664 | 264.4057664 |
| 11/11/2013 18:00 | 0 | 264.4237536 | 264.4109728 | 264.408048 | 264.424664 | 264.4067664 |
| 11/11/2013 18:10 | 0 | 264.4222296 | 264.4109728 | 264.408048 | 264.423664 | 264.4057664 |
| 11/11/2013 18:20 | 0 | 264.4219248 | 264.4119728 | 264.408048 | 264.425664 | 264.4077664 |



|                  |   |             |             |            |            |             |
|------------------|---|-------------|-------------|------------|------------|-------------|
| 11/11/2013 18:30 | 0 | 264.4213152 | 264.4089728 | 264.408048 | 264.424664 | 264.4067664 |
| 11/11/2013 18:40 | 0 | 264.4213152 | 264.4089728 | 264.405048 | 264.423664 | 264.4057664 |
| 11/11/2013 18:50 | 0 | 264.4213152 | 264.4089728 | 264.406048 | 264.423664 | 264.4057664 |
| 11/11/2013 19:00 | 0 | 264.4210104 | 264.4099728 | 264.405048 | 264.422664 | 264.4067664 |
| 11/11/2013 19:10 | 0 | 264.4210104 | 264.4119728 | 264.406048 | 264.424664 | 264.4067664 |
| 11/11/2013 19:20 | 0 | 264.4213152 | 264.4109728 | 264.406048 | 264.424664 | 264.4057664 |
| 11/11/2013 19:30 | 0 | 264.4210104 | 264.4139728 | 264.406048 | 264.422664 | 264.4077664 |
| 11/11/2013 19:40 | 0 | 264.42162   | 264.4129728 | 264.403048 | 264.421664 | 264.4037664 |
| 11/11/2013 19:50 | 0 | 264.4219248 | 264.4159728 | 264.410048 | 264.426664 | 264.4077664 |
| 11/11/2013 20:00 | 0 | 264.4222296 | 264.4149728 | 264.408048 | 264.423664 | 264.4067664 |
| 11/11/2013 20:10 | 0 | 264.423144  | 264.4119728 | 264.408048 | 264.422664 | 264.4077664 |
| 11/11/2013 20:20 | 0 | 264.423144  | 264.4139728 | 264.407048 | 264.422664 | 264.4077664 |
| 11/11/2013 20:30 | 0 | 264.4237536 | 264.4159728 | 264.410048 | 264.423664 | 264.4097664 |
| 11/11/2013 20:40 | 0 | 264.4240584 | 264.4179728 | 264.409048 | 264.422664 | 264.4087664 |
| 11/11/2013 20:50 | 0 | 264.4252776 | 264.4179728 | 264.411048 | 264.422664 | 264.4077664 |
| 11/11/2013 21:00 | 0 | 264.4264968 | 264.4219728 | 264.413048 | 264.423664 | 264.4097664 |
| 11/11/2013 21:10 | 0 | 264.4264968 | 264.4239728 | 264.413048 | 264.422664 | 264.4097664 |
| 11/11/2013 21:20 | 0 | 264.4274112 | 264.4189728 | 264.415048 | 264.420664 | 264.4097664 |
| 11/11/2013 21:30 | 0 | 264.4271064 | 264.4269728 | 264.415048 | 264.422664 | 264.4117664 |
| 11/11/2013 21:40 | 0 | 264.4283256 | 264.4259728 | 264.416048 | 264.424664 | 264.4137664 |
| 11/11/2013 21:50 | 0 | 264.4295448 | 264.4229728 | 264.417048 | 264.423664 | 264.4127664 |
| 11/11/2013 22:00 | 0 | 264.4298496 | 264.4219728 | 264.417048 | 264.420664 | 264.4117664 |
| 11/11/2013 22:10 | 0 | 264.4298496 | 264.4289728 | 264.418048 | 264.421664 | 264.4137664 |
| 11/11/2013 22:20 | 0 | 264.4304592 | 264.4239728 | 264.420048 | 264.425664 | 264.4127664 |
| 11/11/2013 22:30 | 0 | 264.4304592 | 264.4229728 | 264.417048 | 264.420664 | 264.4087664 |
| 11/11/2013 22:40 | 0 | 264.4304592 | 264.4279728 | 264.421048 | 264.424664 | 264.4167664 |
| 11/11/2013 22:50 | 0 | 264.430764  | 264.4249728 | 264.421048 | 264.421664 | 264.4137664 |
| 11/11/2013 23:00 | 0 | 264.430764  | 264.4259728 | 264.419048 | 264.421664 | 264.4137664 |
| 11/11/2013 23:10 | 0 | 264.4313736 | 264.4259728 | 264.419048 | 264.422664 | 264.4147664 |
| 11/11/2013 23:20 | 0 | 264.4316784 | 264.4259728 | 264.422048 | 264.424664 | 264.4147664 |
| 11/11/2013 23:30 | 0 | 264.4313736 | 264.4269728 | 264.422048 | 264.424664 | 264.4157664 |
| 11/11/2013 23:40 | 0 | 264.430764  | 264.4239728 | 264.419048 | 264.422664 | 264.4127664 |
| 11/11/2013 23:50 | 0 | 264.4316784 | 264.4239728 | 264.422048 | 264.424664 | 264.4167664 |
| 11/12/2013 0:00  | 0 | 264.4319832 | 264.4279728 | 264.420048 | 264.423664 | 264.4167664 |
| 11/12/2013 0:10  | 0 | 264.432288  | 264.4219728 | 264.420048 | 264.421664 | 264.4127664 |
| 11/12/2013 0:20  | 0 | 264.4310688 | 264.4229728 | 264.422048 | 264.421664 | 264.4137664 |
| 11/12/2013 0:30  | 0 | 264.4298496 | 264.4239728 | 264.420048 | 264.422664 | 264.4147664 |
| 11/12/2013 0:40  | 0 | 264.4301544 | 264.4139728 | 264.417048 | 264.422664 | 264.4117664 |
| 11/12/2013 0:50  | 0 | 264.4274112 | 264.4139728 | 264.415048 | 264.422664 | 264.4117664 |
| 11/12/2013 1:00  | 0 | 264.4258872 | 264.4189728 | 264.416048 | 264.421664 | 264.4117664 |
| 11/12/2013 1:10  | 0 | 264.4264968 | 264.4139728 | 264.416048 | 264.423664 | 264.4117664 |
| 11/12/2013 1:20  | 0 | 264.4258872 | 264.4129728 | 264.412048 | 264.420664 | 264.4097664 |
| 11/12/2013 1:30  | 0 | 264.4252776 | 264.4119728 | 264.411048 | 264.418664 | 264.4087664 |
| 11/12/2013 1:40  | 0 | 264.4243632 | 264.4119728 | 264.411048 | 264.420664 | 264.4077664 |
| 11/12/2013 1:50  | 0 | 264.4228392 | 264.4139728 | 264.410048 | 264.421664 | 264.4077664 |
| 11/12/2013 2:00  | 0 | 264.4228392 | 264.4069728 | 264.409048 | 264.421664 | 264.4057664 |
| 11/12/2013 2:10  | 0 | 264.4210104 | 264.4089728 | 264.408048 | 264.423664 | 264.4057664 |

|                  |   |             |             |            |            |             |
|------------------|---|-------------|-------------|------------|------------|-------------|
| 11/12/2013 2:20  | 0 | 264.4197912 | 264.4049728 | 264.405048 | 264.418664 | 264.4037664 |
| 11/12/2013 2:30  | 0 | 264.4188768 | 264.4059728 | 264.407048 | 264.423664 | 264.4067664 |
| 11/12/2013 2:40  | 0 | 264.4173528 | 264.4049728 | 264.404048 | 264.420664 | 264.4037664 |
| 11/12/2013 2:50  | 0 | 264.4161336 | 264.3999728 | 264.401048 | 264.419664 | 264.4027664 |
| 11/12/2013 3:00  | 0 | 264.4149144 | 264.4039728 | 264.400048 | 264.419664 | 264.4047664 |
| 11/12/2013 3:10  | 0 | 264.4143048 | 264.3969728 | 264.397048 | 264.418664 | 264.4007664 |
| 11/12/2013 3:20  | 0 | 264.4127808 | 264.3969728 | 264.397048 | 264.421664 | 264.4027664 |
| 11/12/2013 3:30  | 0 | 264.4118664 | 264.3979728 | 264.394048 | 264.420664 | 264.3997664 |
| 11/12/2013 3:40  | 0 | 264.4115616 | 264.3959728 | 264.394048 | 264.420664 | 264.4007664 |
| 11/12/2013 3:50  | 0 | 264.4106472 | 264.3959728 | 264.393048 | 264.421664 | 264.3987664 |
| 11/12/2013 4:00  | 0 | 264.4103424 | 264.3929728 | 264.390048 | 264.417664 | 264.3967664 |
| 11/12/2013 4:10  | 0 | 264.4097328 | 264.3949728 | 264.390048 | 264.419664 | 264.3987664 |
| 11/12/2013 4:20  | 0 | 264.4091232 | 264.3899728 | 264.388048 | 264.418664 | 264.3977664 |
| 11/12/2013 4:30  | 0 | 264.4085136 | 264.3909728 | 264.389048 | 264.421664 | 264.3987664 |
| 11/12/2013 4:40  | 0 | 264.4085136 | 264.3899728 | 264.389048 | 264.419664 | 264.3967664 |
| 11/12/2013 4:50  | 0 | 264.4082088 | 264.3879728 | 264.386048 | 264.418664 | 264.3967664 |
| 11/12/2013 5:00  | 0 | 264.4075992 | 264.3879728 | 264.386048 | 264.418664 | 264.3957664 |
| 11/12/2013 5:10  | 0 | 264.4069896 | 264.3879728 | 264.386048 | 264.420664 | 264.3937664 |
| 11/12/2013 5:20  | 0 | 264.40638   | 264.3869728 | 264.386048 | 264.414664 | 264.3937664 |
| 11/12/2013 5:30  | 0 | 264.4060752 | 264.3859728 | 264.386048 | 264.418664 | 264.3957664 |
| 11/12/2013 5:40  | 0 | 264.4057704 | 264.3839728 | 264.382048 | 264.415664 | 264.3907664 |
| 11/12/2013 5:50  | 0 | 264.404856  | 264.3859728 | 264.384048 | 264.419664 | 264.3927664 |
| 11/12/2013 6:00  | 0 | 264.404856  | 264.3859728 | 264.384048 | 264.420664 | 264.3937664 |
| 11/12/2013 6:10  | 0 | 264.4045512 | 264.3889728 | 264.386048 | 264.420664 | 264.3967664 |
| 11/12/2013 6:20  | 0 | 264.4042464 | 264.3849728 | 264.383048 | 264.417664 | 264.3927664 |
| 11/12/2013 6:30  | 0 | 264.4039416 | 264.3859728 | 264.384048 | 264.417664 | 264.3957664 |
| 11/12/2013 6:40  | 0 | 264.4036368 | 264.3839728 | 264.380048 | 264.416664 | 264.3917664 |
| 11/12/2013 6:50  | 0 | 264.403332  | 264.3869728 | 264.382048 | 264.416664 | 264.3927664 |
| 11/12/2013 7:00  | 0 | 264.4030272 | 264.3859728 | 264.382048 | 264.415664 | 264.3907664 |
| 11/12/2013 7:10  | 0 | 264.403332  | 264.3889728 | 264.385048 | 264.418664 | 264.3917664 |
| 11/12/2013 7:20  | 0 | 264.403332  | 264.3889728 | 264.382048 | 264.417664 | 264.3917664 |
| 11/12/2013 7:30  | 0 | 264.4036368 | 264.3879728 | 264.381048 | 264.416664 | 264.3907664 |
| 11/12/2013 7:40  | 0 | 264.403332  | 264.3879728 | 264.382048 | 264.414664 | 264.3927664 |
| 11/12/2013 7:50  | 0 | 264.4036368 | 264.3889728 | 264.384048 | 264.414664 | 264.3927664 |
| 11/12/2013 8:00  | 0 | 264.4039416 | 264.3909728 | 264.386048 | 264.416664 | 264.3927664 |
| 11/12/2013 8:10  | 0 | 264.4042464 | 264.3869728 | 264.385048 | 264.416664 | 264.3927664 |
| 11/12/2013 8:20  | 0 | 264.4027224 | 264.3819728 | 264.383048 | 264.416664 | 264.3917664 |
| 11/12/2013 8:30  | 0 | 264.4015032 | 264.3809728 | 264.379048 | 264.415664 | 264.3907664 |
| 11/12/2013 8:40  | 0 | 264.4021128 | 264.4049728 | 264.382048 | 264.416664 | 264.3937664 |
| 11/12/2013 8:50  | 0 | 264.4103424 | 264.4089728 | 264.390048 | 264.413664 | 264.3977664 |
| 11/12/2013 9:00  | 0 | 264.4146096 | 264.4129728 | 264.395048 | 264.415664 | 264.3997664 |
| 11/12/2013 9:10  | 0 | 264.417048  | 264.4139728 | 264.402048 | 264.416664 | 264.4007664 |
| 11/12/2013 9:20  | 0 | 264.4188768 | 264.4189728 | 264.405048 | 264.418664 | 264.4027664 |
| 11/12/2013 9:30  | 0 | 264.4219248 | 264.4269728 | 264.410048 | 264.418664 | 264.4077664 |
| 11/12/2013 9:40  | 0 | 264.424668  | 264.4269728 | 264.414048 | 264.415664 | 264.4077664 |
| 11/12/2013 9:50  | 0 | 264.4264968 | 264.4259728 | 264.416048 | 264.416664 | 264.4097664 |
| 11/12/2013 10:00 | 0 | 264.4286304 | 264.4339728 | 264.421048 | 264.415664 | 264.4117664 |

|                  |   |             |             |            |            |             |
|------------------|---|-------------|-------------|------------|------------|-------------|
| 11/12/2013 10:10 | 0 | 264.4310688 | 264.4369728 | 264.422048 | 264.414664 | 264.4117664 |
| 11/12/2013 10:20 | 0 | 264.4328976 | 264.4339728 | 264.425048 | 264.416664 | 264.4117664 |
| 11/12/2013 10:30 | 0 | 264.433812  | 264.4339728 | 264.427048 | 264.418664 | 264.4127664 |
| 11/12/2013 10:40 | 0 | 264.433812  | 264.4339728 | 264.427048 | 264.416664 | 264.4147664 |
| 11/12/2013 10:50 | 0 | 264.4350312 | 264.4359728 | 264.427048 | 264.414664 | 264.4137664 |
| 11/12/2013 11:00 | 0 | 264.435336  | 264.4309728 | 264.427048 | 264.416664 | 264.4127664 |
| 11/12/2013 11:10 | 0 | 264.4335072 | 264.4289728 | 264.424048 | 264.417664 | 264.4107664 |
| 11/12/2013 11:20 | 0 | 264.4332024 | 264.4219728 | 264.424048 | 264.415664 | 264.4127664 |
| 11/12/2013 11:30 | 0 | 264.4319832 | 264.4319728 | 264.423048 | 264.415664 | 264.4137664 |
| 11/12/2013 11:40 | 0 | 264.4335072 | 264.4359728 | 264.427048 | 264.418664 | 264.4147664 |
| 11/12/2013 11:50 | 0 | 264.4359456 | 264.4399728 | 264.428048 | 264.416664 | 264.4187664 |
| 11/12/2013 12:00 | 0 | 264.4386888 | 264.4429728 | 264.432048 | 264.416664 | 264.4187664 |
| 11/12/2013 12:10 | 0 | 264.4396032 | 264.4409728 | 264.431048 | 264.413664 | 264.4167664 |
| 11/12/2013 12:20 | 0 | 264.4408224 | 264.4409728 | 264.434048 | 264.415664 | 264.4217664 |
| 11/12/2013 12:30 | 0 | 264.4408224 | 264.4449728 | 264.438048 | 264.416664 | 264.4227664 |
| 11/12/2013 12:40 | 0 | 264.4405176 | 264.4369728 | 264.435048 | 264.416664 | 264.4207664 |
| 11/12/2013 12:50 | 0 | 264.4402128 | 264.4359728 | 264.435048 | 264.415664 | 264.4197664 |
| 11/12/2013 13:00 | 0 | 264.4386888 | 264.4299728 | 264.430048 | 264.413664 | 264.4197664 |
| 11/12/2013 13:10 | 0 | 264.4371648 | 264.4259728 | 264.429048 | 264.418664 | 264.4177664 |
| 11/12/2013 13:20 | 0 | 264.4335072 | 264.4139728 | 264.423048 | 264.414664 | 264.4127664 |
| 11/12/2013 13:30 | 0 | 264.430764  | 264.4289728 | 264.423048 | 264.417664 | 264.4157664 |
| 11/12/2013 13:40 | 0 | 264.4319832 | 264.4229728 | 264.422048 | 264.413664 | 264.4147664 |
| 11/12/2013 13:50 | 0 | 264.4304592 | 264.4189728 | 264.419048 | 264.415664 | 264.4117664 |
| 11/12/2013 14:00 | 0 | 264.4283256 | 264.4169728 | 264.417048 | 264.416664 | 264.4127664 |
| 11/12/2013 14:10 | 0 | 264.426192  | 264.4119728 | 264.413048 | 264.416664 | 264.4107664 |
| 11/12/2013 14:20 | 0 | 264.4240584 | 264.4109728 | 264.411048 | 264.418664 | 264.4107664 |
| 11/12/2013 14:30 | 0 | 264.4222296 | 264.4099728 | 264.407048 | 264.417664 | 264.4087664 |
| 11/12/2013 14:40 | 0 | 264.4210104 | 264.4099728 | 264.407048 | 264.415664 | 264.4087664 |
| 11/12/2013 14:50 | 0 | 264.4207056 | 264.4049728 | 264.403048 | 264.412664 | 264.4057664 |
| 11/12/2013 15:00 | 0 | 264.4194864 | 264.4079728 | 264.405048 | 264.415664 | 264.4067664 |
| 11/12/2013 15:10 | 0 | 264.4194864 | 264.4089728 | 264.406048 | 264.416664 | 264.4077664 |
| 11/12/2013 15:20 | 0 | 264.4191816 | 264.4089728 | 264.405048 | 264.414664 | 264.4087664 |
| 11/12/2013 15:30 | 0 | 264.4191816 | 264.4089728 | 264.404048 | 264.412664 | 264.4057664 |
| 11/12/2013 15:40 | 0 | 264.4191816 | 264.4109728 | 264.404048 | 264.417664 | 264.4087664 |
| 11/12/2013 15:50 | 0 | 264.4188768 | 264.4099728 | 264.402048 | 264.415664 | 264.4057664 |
| 11/12/2013 16:00 | 0 | 264.4182672 | 264.4069728 | 264.402048 | 264.413664 | 264.4037664 |
| 11/12/2013 16:10 | 0 | 264.4173528 | 264.4069728 | 264.404048 | 264.415664 | 264.4047664 |
| 11/12/2013 16:20 | 0 | 264.4167432 | 264.4059728 | 264.403048 | 264.415664 | 264.4067664 |
| 11/12/2013 16:30 | 0 | 264.4164384 | 264.4069728 | 264.403048 | 264.416664 | 264.4037664 |
| 11/12/2013 16:40 | 0 | 264.4164384 | 264.4069728 | 264.403048 | 264.415664 | 264.4057664 |
| 11/12/2013 16:50 | 0 | 264.4161336 | 264.4049728 | 264.400048 | 264.416664 | 264.4067664 |
| 11/12/2013 17:00 | 0 | 264.4167432 | 264.4059728 | 264.403048 | 264.417664 | 264.4057664 |
| 11/12/2013 17:10 | 0 | 264.4161336 | 264.4029728 | 264.402048 | 264.416664 | 264.4047664 |
| 11/12/2013 17:20 | 0 | 264.4152192 | 264.4029728 | 264.400048 | 264.414664 | 264.4027664 |
| 11/12/2013 17:30 | 0 | 264.4152192 | 264.4029728 | 264.402048 | 264.417664 | 264.4037664 |
| 11/12/2013 17:40 | 0 | 264.4146096 | 264.4009728 | 264.399048 | 264.413664 | 264.4017664 |
| 11/12/2013 17:50 | 0 | 264.414     | 264.4019728 | 264.398048 | 264.414664 | 264.4037664 |

|                  |   |             |             |            |            |             |
|------------------|---|-------------|-------------|------------|------------|-------------|
| 11/12/2013 18:00 | 0 | 264.4136952 | 264.4059728 | 264.400048 | 264.417664 | 264.4047664 |
| 11/12/2013 18:10 | 0 | 264.414     | 264.4019728 | 264.398048 | 264.416664 | 264.3997664 |
| 11/12/2013 18:20 | 0 | 264.4133904 | 264.3979728 | 264.397048 | 264.415664 | 264.4007664 |
| 11/12/2013 18:30 | 0 | 264.4103424 | 264.3889728 | 264.392048 | 264.415664 | 264.3957664 |
| 11/12/2013 18:40 | 0 | 264.4066848 | 264.3799728 | 264.390048 | 264.413664 | 264.3937664 |
| 11/12/2013 18:50 | 0 | 264.4030272 | 264.3829728 | 264.387048 | 264.416664 | 264.3967664 |
| 11/12/2013 19:00 | 0 | 264.4008936 | 264.3799728 | 264.383048 | 264.414664 | 264.3927664 |
| 11/12/2013 19:10 | 0 | 264.3999792 | 264.3799728 | 264.379048 | 264.415664 | 264.3917664 |
| 11/12/2013 19:20 | 0 | 264.3990648 | 264.3799728 | 264.378048 | 264.414664 | 264.3927664 |
| 11/12/2013 19:30 | 0 | 264.3984552 | 264.3779728 | 264.378048 | 264.414664 | 264.3907664 |
| 11/12/2013 19:40 | 0 | 264.3981504 | 264.3779728 | 264.376048 | 264.412664 | 264.3907664 |
| 11/12/2013 19:50 | 0 | 264.3981504 | 264.3779728 | 264.378048 | 264.414664 | 264.3907664 |
| 11/12/2013 20:00 | 0 | 264.3978456 | 264.3799728 | 264.377048 | 264.414664 | 264.3887664 |
| 11/12/2013 20:10 | 0 | 264.3978456 | 264.3799728 | 264.375048 | 264.410664 | 264.3887664 |
| 11/12/2013 20:20 | 0 | 264.3978456 | 264.3789728 | 264.377048 | 264.413664 | 264.3897664 |
| 11/12/2013 20:30 | 0 | 264.3978456 | 264.3809728 | 264.377048 | 264.413664 | 264.3887664 |
| 11/12/2013 20:40 | 0 | 264.3978456 | 264.3849728 | 264.379048 | 264.416664 | 264.3927664 |
| 11/12/2013 20:50 | 0 | 264.3978456 | 264.3839728 | 264.378048 | 264.412664 | 264.3907664 |
| 11/12/2013 21:00 | 0 | 264.3981504 | 264.3819728 | 264.378048 | 264.411664 | 264.3897664 |
| 11/12/2013 21:10 | 0 | 264.3984552 | 264.3819728 | 264.379048 | 264.411664 | 264.3897664 |
| 11/12/2013 21:20 | 0 | 264.3990648 | 264.3839728 | 264.378048 | 264.411664 | 264.3897664 |
| 11/12/2013 21:30 | 0 | 264.3990648 | 264.3869728 | 264.381048 | 264.412664 | 264.3927664 |
| 11/12/2013 21:40 | 0 | 264.3996744 | 264.3869728 | 264.381048 | 264.411664 | 264.3927664 |
| 11/12/2013 21:50 | 0 | 264.3999792 | 264.3869728 | 264.382048 | 264.412664 | 264.3927664 |
| 11/12/2013 22:00 | 0 | 264.400284  | 264.3869728 | 264.382048 | 264.411664 | 264.3897664 |
| 11/12/2013 22:10 | 0 | 264.400284  | 264.3879728 | 264.380048 | 264.410664 | 264.3897664 |
| 11/12/2013 22:20 | 0 | 264.4005888 | 264.3869728 | 264.383048 | 264.408664 | 264.3917664 |
| 11/12/2013 22:30 | 0 | 264.4008936 | 264.3859728 | 264.382048 | 264.407664 | 264.3877664 |
| 11/12/2013 22:40 | 0 | 264.4008936 | 264.3869728 | 264.383048 | 264.409664 | 264.3897664 |
| 11/12/2013 22:50 | 0 | 264.4011984 | 264.3869728 | 264.382048 | 264.409664 | 264.3897664 |
| 11/12/2013 23:00 | 0 | 264.4015032 | 264.3859728 | 264.381048 | 264.408664 | 264.3887664 |
| 11/12/2013 23:10 | 0 | 264.4015032 | 264.3879728 | 264.383048 | 264.411664 | 264.3917664 |
| 11/12/2013 23:20 | 0 | 264.4015032 | 264.3869728 | 264.383048 | 264.407664 | 264.3897664 |
| 11/12/2013 23:30 | 0 | 264.4011984 | 264.3869728 | 264.383048 | 264.409664 | 264.3897664 |
| 11/12/2013 23:40 | 0 | 264.4008936 | 264.3859728 | 264.385048 | 264.410664 | 264.3887664 |
| 11/12/2013 23:50 | 0 | 264.4008936 | 264.3859728 | 264.382048 | 264.407664 | 264.3877664 |
| 11/13/2013 0:00  | 0 | 264.4005888 | 264.3859728 | 264.384048 | 264.408664 | 264.3897664 |
| 11/13/2013 0:10  | 0 | 264.4005888 | 264.3879728 | 264.385048 | 264.409664 | 264.3897664 |
| 11/13/2013 0:20  | 0 | 264.3999792 | 264.3859728 | 264.384048 | 264.408664 | 264.3877664 |
| 11/13/2013 0:30  | 0 | 264.3999792 | 264.3849728 | 264.380048 | 264.407664 | 264.3857664 |
| 11/13/2013 0:40  | 0 | 264.3996744 | 264.3859728 | 264.383048 | 264.409664 | 264.3887664 |
| 11/13/2013 0:50  | 0 | 264.3990648 | 264.3839728 | 264.383048 | 264.409664 | 264.3887664 |
| 11/13/2013 1:00  | 0 | 264.3984552 | 264.3819728 | 264.383048 | 264.409664 | 264.3887664 |
| 11/13/2013 1:10  | 0 | 264.3981504 | 264.3819728 | 264.379048 | 264.407664 | 264.3867664 |
| 11/13/2013 1:20  | 0 | 264.3978456 | 264.3819728 | 264.379048 | 264.405664 | 264.3877664 |
| 11/13/2013 1:30  | 0 | 264.3978456 | 264.3829728 | 264.382048 | 264.408664 | 264.3907664 |
| 11/13/2013 1:40  | 0 | 264.3975408 | 264.3819728 | 264.379048 | 264.406664 | 264.3877664 |

|                 |   |             |             |            |            |             |
|-----------------|---|-------------|-------------|------------|------------|-------------|
| 11/13/2013 1:50 | 0 | 264.3975408 | 264.3799728 | 264.379048 | 264.406664 | 264.3877664 |
| 11/13/2013 2:00 | 0 | 264.3969312 | 264.3799728 | 264.379048 | 264.406664 | 264.3877664 |
| 11/13/2013 2:10 | 0 | 264.3966264 | 264.3779728 | 264.380048 | 264.408664 | 264.3877664 |
| 11/13/2013 2:20 | 0 | 264.3960168 | 264.3779728 | 264.377048 | 264.404664 | 264.3857664 |
| 11/13/2013 2:30 | 0 | 264.3954072 | 264.3749728 | 264.375048 | 264.406664 | 264.3847664 |
| 11/13/2013 2:40 | 0 | 264.3951024 | 264.3739728 | 264.375048 | 264.406664 | 264.3857664 |
| 11/13/2013 2:50 | 0 | 264.3944928 | 264.3709728 | 264.372048 | 264.404664 | 264.3807664 |
| 11/13/2013 3:00 | 0 | 264.394188  | 264.3719728 | 264.373048 | 264.407664 | 264.3827664 |
| 11/13/2013 3:10 | 0 | 264.3935784 | 264.3719728 | 264.372048 | 264.407664 | 264.3847664 |
| 11/13/2013 3:20 | 0 | 264.3929688 | 264.3749728 | 264.374048 | 264.408664 | 264.3857664 |
| 11/13/2013 3:30 | 0 | 264.392664  | 264.3699728 | 264.371048 | 264.406664 | 264.3827664 |
| 11/13/2013 3:40 | 0 | 264.3917496 | 264.3749728 | 264.372048 | 264.409664 | 264.3867664 |
| 11/13/2013 3:50 | 0 | 264.3914448 | 264.3699728 | 264.368048 | 264.407664 | 264.3807664 |
| 11/13/2013 4:00 | 0 | 264.3908352 | 264.3689728 | 264.368048 | 264.405664 | 264.3827664 |
| 11/13/2013 4:10 | 0 | 264.3902256 | 264.3669728 | 264.368048 | 264.405664 | 264.3807664 |
| 11/13/2013 4:20 | 0 | 264.3899208 | 264.3689728 | 264.368048 | 264.407664 | 264.3817664 |
| 11/13/2013 4:30 | 0 | 264.389616  | 264.3659728 | 264.370048 | 264.405664 | 264.3797664 |
| 11/13/2013 4:40 | 0 | 264.3890064 | 264.3659728 | 264.370048 | 264.405664 | 264.3797664 |
| 11/13/2013 4:50 | 0 | 264.3887016 | 264.3659728 | 264.367048 | 264.405664 | 264.3797664 |
| 11/13/2013 5:00 | 0 | 264.388092  | 264.3649728 | 264.365048 | 264.405664 | 264.3787664 |
| 11/13/2013 5:10 | 0 | 264.388092  | 264.3659728 | 264.366048 | 264.404664 | 264.3797664 |
| 11/13/2013 5:20 | 0 | 264.3874824 | 264.3649728 | 264.366048 | 264.404664 | 264.3777664 |
| 11/13/2013 5:30 | 0 | 264.3874824 | 264.3659728 | 264.364048 | 264.403664 | 264.3777664 |
| 11/13/2013 5:40 | 0 | 264.3868728 | 264.3649728 | 264.364048 | 264.406664 | 264.3807664 |
| 11/13/2013 5:50 | 0 | 264.386568  | 264.3659728 | 264.363048 | 264.403664 | 264.3797664 |
| 11/13/2013 6:00 | 0 | 264.386568  | 264.3629728 | 264.362048 | 264.403664 | 264.3757664 |
| 11/13/2013 6:10 | 0 | 264.3862632 | 264.3619728 | 264.363048 | 264.402664 | 264.3767664 |
| 11/13/2013 6:20 | 0 | 264.3859584 | 264.3639728 | 264.365048 | 264.404664 | 264.3787664 |
| 11/13/2013 6:30 | 0 | 264.3856536 | 264.3629728 | 264.364048 | 264.403664 | 264.3767664 |
| 11/13/2013 6:40 | 0 | 264.3853488 | 264.3649728 | 264.363048 | 264.403664 | 264.3797664 |
| 11/13/2013 6:50 | 0 | 264.3853488 | 264.3619728 | 264.362048 | 264.402664 | 264.3747664 |
| 11/13/2013 7:00 | 0 | 264.3847392 | 264.3649728 | 264.362048 | 264.402664 | 264.3767664 |
| 11/13/2013 7:10 | 0 | 264.3844344 | 264.3639728 | 264.363048 | 264.402664 | 264.3787664 |
| 11/13/2013 7:20 | 0 | 264.3844344 | 264.3639728 | 264.362048 | 264.402664 | 264.3767664 |
| 11/13/2013 7:30 | 0 | 264.3841296 | 264.3619728 | 264.361048 | 264.400664 | 264.3747664 |
| 11/13/2013 7:40 | 0 | 264.3844344 | 264.3639728 | 264.361048 | 264.402664 | 264.3767664 |
| 11/13/2013 7:50 | 0 | 264.3844344 | 264.3669728 | 264.363048 | 264.403664 | 264.3757664 |
| 11/13/2013 8:00 | 0 | 264.3844344 | 264.3659728 | 264.362048 | 264.402664 | 264.3767664 |
| 11/13/2013 8:10 | 0 | 264.3853488 | 264.3689728 | 264.364048 | 264.404664 | 264.3767664 |
| 11/13/2013 8:20 | 0 | 264.3859584 | 264.3709728 | 264.364048 | 264.405664 | 264.3777664 |
| 11/13/2013 8:30 | 0 | 264.3868728 | 264.3749728 | 264.364048 | 264.401664 | 264.3777664 |
| 11/13/2013 8:40 | 0 | 264.3917496 | 264.3999728 | 264.372048 | 264.401664 | 264.3827664 |
| 11/13/2013 8:50 | 0 | 264.4015032 | 264.4209728 | 264.384048 | 264.402664 | 264.3927664 |
| 11/13/2013 9:00 | 0 | 264.4121712 | 264.4319728 | 264.401048 | 264.403664 | 264.4007664 |
| 11/13/2013 9:10 | 0 | 264.4191816 | 264.4349728 | 264.410048 | 264.405664 | 264.4027664 |
| 11/13/2013 9:20 | 0 | 264.4234488 | 264.4339728 | 264.417048 | 264.401664 | 264.4067664 |
| 11/13/2013 9:30 | 0 | 264.4264968 | 264.4349728 | 264.422048 | 264.404664 | 264.4057664 |

|                  |   |             |             |            |            |             |
|------------------|---|-------------|-------------|------------|------------|-------------|
| 11/13/2013 9:40  | 0 | 264.4289352 | 264.4349728 | 264.425048 | 264.404664 | 264.4077664 |
| 11/13/2013 9:50  | 0 | 264.4304592 | 264.4399728 | 264.428048 | 264.405664 | 264.4107664 |
| 11/13/2013 10:00 | 0 | 264.4332024 | 264.4479728 | 264.433048 | 264.405664 | 264.4137664 |
| 11/13/2013 10:10 | 0 | 264.43686   | 264.4559728 | 264.437048 | 264.405664 | 264.4167664 |
| 11/13/2013 10:20 | 0 | 264.4411272 | 264.4589728 | 264.443048 | 264.405664 | 264.4187664 |
| 11/13/2013 10:30 | 0 | 264.44448   | 264.4609728 | 264.448048 | 264.406664 | 264.4217664 |
| 11/13/2013 10:40 | 0 | 264.4466136 | 264.4619728 | 264.451048 | 264.403664 | 264.4227664 |
| 11/13/2013 10:50 | 0 | 264.4487472 | 264.4629728 | 264.454048 | 264.406664 | 264.4257664 |
| 11/13/2013 11:00 | 0 | 264.4508808 | 264.4629728 | 264.455048 | 264.406664 | 264.4257664 |
| 11/13/2013 11:10 | 0 | 264.4524048 | 264.4639728 | 264.458048 | 264.405664 | 264.4267664 |
| 11/13/2013 11:20 | 0 | 264.4542336 | 264.4639728 | 264.457048 | 264.405664 | 264.4277664 |
| 11/13/2013 11:30 | 0 | 264.4554528 | 264.4669728 | 264.460048 | 264.407664 | 264.4307664 |
| 11/13/2013 11:40 | 0 | 264.4557576 | 264.4619728 | 264.458048 | 264.406664 | 264.4307664 |
| 11/13/2013 11:50 | 0 | 264.4560624 | 264.4599728 | 264.458048 | 264.406664 | 264.4287664 |
| 11/13/2013 12:00 | 0 | 264.4560624 | 264.4579728 | 264.457048 | 264.403664 | 264.4277664 |
| 11/13/2013 12:10 | 0 | 264.4545384 | 264.4529728 | 264.453048 | 264.403664 | 264.4277664 |
| 11/13/2013 12:20 | 0 | 264.4530144 | 264.4509728 | 264.453048 | 264.405664 | 264.4267664 |
| 11/13/2013 12:30 | 0 | 264.4514904 | 264.4469728 | 264.451048 | 264.408664 | 264.4257664 |
| 11/13/2013 12:40 | 0 | 264.4496616 | 264.4379728 | 264.445048 | 264.405664 | 264.4227664 |
| 11/13/2013 12:50 | 0 | 264.4441752 | 264.4199728 | 264.439048 | 264.404664 | 264.4177664 |
| 11/13/2013 13:00 | 0 | 264.4377744 | 264.4119728 | 264.427048 | 264.405664 | 264.4147664 |
| 11/13/2013 13:10 | 0 | 264.4313736 | 264.3979728 | 264.417048 | 264.404664 | 264.4097664 |
| 11/13/2013 13:20 | 0 | 264.424668  | 264.3899728 | 264.408048 | 264.405664 | 264.4057664 |
| 11/13/2013 13:30 | 0 | 264.4179624 | 264.3809728 | 264.397048 | 264.403664 | 264.3997664 |
| 11/13/2013 13:40 | 0 | 264.4121712 | 264.3809728 | 264.389048 | 264.404664 | 264.3997664 |
| 11/13/2013 13:50 | 0 | 264.4085136 | 264.3769728 | 264.387048 | 264.402664 | 264.3967664 |
| 11/13/2013 14:00 | 0 | 264.4057704 | 264.3779728 | 264.381048 | 264.403664 | 264.3967664 |
| 11/13/2013 14:10 | 0 | 264.4045512 | 264.3789728 | 264.380048 | 264.404664 | 264.3957664 |
| 11/13/2013 14:20 | 0 | 264.4024176 | 264.3789728 | 264.379048 | 264.405664 | 264.3957664 |
| 11/13/2013 14:30 | 0 | 264.4005888 | 264.3739728 | 264.376048 | 264.405664 | 264.3917664 |
| 11/13/2013 14:40 | 0 | 264.39876   | 264.3789728 | 264.374048 | 264.405664 | 264.3937664 |
| 11/13/2013 14:50 | 0 | 264.3999792 | 264.3889728 | 264.378048 | 264.403664 | 264.3957664 |
| 11/13/2013 15:00 | 0 | 264.4024176 | 264.3909728 | 264.379048 | 264.405664 | 264.3937664 |
| 11/13/2013 15:10 | 0 | 264.4045512 | 264.3929728 | 264.383048 | 264.404664 | 264.3967664 |
| 11/13/2013 15:20 | 0 | 264.4054656 | 264.3929728 | 264.385048 | 264.404664 | 264.3967664 |
| 11/13/2013 15:30 | 0 | 264.4057704 | 264.3929728 | 264.386048 | 264.403664 | 264.3947664 |
| 11/13/2013 15:40 | 0 | 264.4060752 | 264.3939728 | 264.388048 | 264.404664 | 264.3957664 |
| 11/13/2013 15:50 | 0 | 264.4054656 | 264.3939728 | 264.389048 | 264.404664 | 264.3947664 |
| 11/13/2013 16:00 | 0 | 264.4051608 | 264.3939728 | 264.387048 | 264.405664 | 264.3947664 |
| 11/13/2013 16:10 | 0 | 264.404856  | 264.3969728 | 264.388048 | 264.403664 | 264.3967664 |
| 11/13/2013 16:20 | 0 | 264.4057704 | 264.3919728 | 264.388048 | 264.403664 | 264.3927664 |
| 11/13/2013 16:30 | 0 | 264.4051608 | 264.3939728 | 264.389048 | 264.404664 | 264.3957664 |
| 11/13/2013 16:40 | 0 | 264.404856  | 264.3809728 | 264.387048 | 264.404664 | 264.3917664 |
| 11/13/2013 16:50 | 0 | 264.39876   | 264.3699728 | 264.380048 | 264.405664 | 264.3867664 |
| 11/13/2013 17:00 | 0 | 264.3960168 | 264.3729728 | 264.376048 | 264.403664 | 264.3867664 |
| 11/13/2013 17:10 | 0 | 264.3944928 | 264.3689728 | 264.371048 | 264.401664 | 264.3847664 |
| 11/13/2013 17:20 | 0 | 264.392664  | 264.3739728 | 264.371048 | 264.403664 | 264.3877664 |

|                  |   |             |             |            |            |             |
|------------------|---|-------------|-------------|------------|------------|-------------|
| 11/13/2013 17:30 | 0 | 264.3917496 | 264.3739728 | 264.369048 | 264.403664 | 264.3837664 |
| 11/13/2013 17:40 | 0 | 264.39114   | 264.3739728 | 264.369048 | 264.403664 | 264.3837664 |
| 11/13/2013 17:50 | 0 | 264.3908352 | 264.3699728 | 264.368048 | 264.401664 | 264.3827664 |
| 11/13/2013 18:00 | 0 | 264.3902256 | 264.3719728 | 264.365048 | 264.401664 | 264.3827664 |
| 11/13/2013 18:10 | 0 | 264.389616  | 264.3719728 | 264.367048 | 264.403664 | 264.3817664 |
| 11/13/2013 18:20 | 0 | 264.3902256 | 264.3749728 | 264.369048 | 264.405664 | 264.3847664 |
| 11/13/2013 18:30 | 0 | 264.389616  | 264.3719728 | 264.367048 | 264.402664 | 264.3807664 |
| 11/13/2013 18:40 | 0 | 264.3899208 | 264.3749728 | 264.368048 | 264.403664 | 264.3827664 |
| 11/13/2013 18:50 | 0 | 264.3893112 | 264.3729728 | 264.367048 | 264.403664 | 264.3797664 |
| 11/13/2013 19:00 | 0 | 264.3890064 | 264.3729728 | 264.368048 | 264.402664 | 264.3797664 |
| 11/13/2013 19:10 | 0 | 264.3890064 | 264.3729728 | 264.370048 | 264.401664 | 264.3817664 |
| 11/13/2013 19:20 | 0 | 264.3887016 | 264.3709728 | 264.368048 | 264.401664 | 264.3797664 |
| 11/13/2013 19:30 | 0 | 264.3883968 | 264.3729728 | 264.368048 | 264.399664 | 264.3787664 |
| 11/13/2013 19:40 | 0 | 264.388092  | 264.3739728 | 264.367048 | 264.399664 | 264.3787664 |
| 11/13/2013 19:50 | 0 | 264.3883968 | 264.3719728 | 264.369048 | 264.402664 | 264.3797664 |
| 11/13/2013 20:00 | 0 | 264.388092  | 264.3769728 | 264.370048 | 264.400664 | 264.3797664 |
| 11/13/2013 20:10 | 0 | 264.3883968 | 264.3719728 | 264.367048 | 264.397664 | 264.3777664 |
| 11/13/2013 20:20 | 0 | 264.3883968 | 264.3749728 | 264.367048 | 264.400664 | 264.3777664 |
| 11/13/2013 20:30 | 0 | 264.3883968 | 264.3739728 | 264.367048 | 264.400664 | 264.3767664 |
| 11/13/2013 20:40 | 0 | 264.3883968 | 264.3739728 | 264.368048 | 264.400664 | 264.3767664 |
| 11/13/2013 20:50 | 0 | 264.388092  | 264.3729728 | 264.370048 | 264.398664 | 264.3777664 |
| 11/13/2013 21:00 | 0 | 264.3883968 | 264.3729728 | 264.369048 | 264.400664 | 264.3777664 |
| 11/13/2013 21:10 | 0 | 264.3874824 | 264.3759728 | 264.370048 | 264.401664 | 264.3777664 |
| 11/13/2013 21:20 | 0 | 264.3877872 | 264.3759728 | 264.371048 | 264.401664 | 264.3787664 |
| 11/13/2013 21:30 | 0 | 264.3877872 | 264.3729728 | 264.367048 | 264.400664 | 264.3767664 |
| 11/13/2013 21:40 | 0 | 264.3877872 | 264.3729728 | 264.367048 | 264.400664 | 264.3767664 |
| 11/13/2013 21:50 | 0 | 264.3874824 | 264.3729728 | 264.367048 | 264.398664 | 264.3767664 |
| 11/13/2013 22:00 | 0 | 264.3874824 | 264.3709728 | 264.366048 | 264.398664 | 264.3747664 |
| 11/13/2013 22:10 | 0 | 264.3874824 | 264.3739728 | 264.369048 | 264.399664 | 264.3777664 |
| 11/13/2013 22:20 | 0 | 264.3877872 | 264.3739728 | 264.370048 | 264.403664 | 264.3787664 |
| 11/13/2013 22:30 | 0 | 264.3877872 | 264.3729728 | 264.367048 | 264.398664 | 264.3757664 |
| 11/13/2013 22:40 | 0 | 264.3874824 | 264.3739728 | 264.367048 | 264.399664 | 264.3757664 |
| 11/13/2013 22:50 | 0 | 264.3874824 | 264.3739728 | 264.369048 | 264.400664 | 264.3777664 |
| 11/13/2013 23:00 | 0 | 264.3874824 | 264.3749728 | 264.367048 | 264.400664 | 264.3777664 |
| 11/13/2013 23:10 | 0 | 264.3874824 | 264.3739728 | 264.369048 | 264.398664 | 264.3777664 |
| 11/13/2013 23:20 | 0 | 264.3871776 | 264.3749728 | 264.370048 | 264.401664 | 264.3787664 |
| 11/13/2013 23:30 | 0 | 264.3874824 | 264.3749728 | 264.369048 | 264.399664 | 264.3787664 |
| 11/13/2013 23:40 | 0 | 264.3871776 | 264.3709728 | 264.369048 | 264.395664 | 264.3767664 |
| 11/13/2013 23:50 | 0 | 264.3868728 | 264.3739728 | 264.366048 | 264.398664 | 264.3767664 |
| 11/14/2013 0:00  | 0 | 264.3868728 | 264.3709728 | 264.366048 | 264.397664 | 264.3747664 |
| 11/14/2013 0:10  | 0 | 264.386568  | 264.3689728 | 264.365048 | 264.398664 | 264.3747664 |
| 11/14/2013 0:20  | 0 | 264.3859584 | 264.3699728 | 264.368048 | 264.398664 | 264.3747664 |
| 11/14/2013 0:30  | 0 | 264.3862632 | 264.3699728 | 264.365048 | 264.397664 | 264.3737664 |
| 11/14/2013 0:40  | 0 | 264.3862632 | 264.3679728 | 264.365048 | 264.397664 | 264.3737664 |
| 11/14/2013 0:50  | 0 | 264.3859584 | 264.3679728 | 264.365048 | 264.396664 | 264.3737664 |
| 11/14/2013 1:00  | 0 | 264.3859584 | 264.3699728 | 264.365048 | 264.397664 | 264.3737664 |
| 11/14/2013 1:10  | 0 | 264.3859584 | 264.3679728 | 264.366048 | 264.395664 | 264.3757664 |

|                 |   |             |             |            |            |             |
|-----------------|---|-------------|-------------|------------|------------|-------------|
| 11/14/2013 1:20 | 0 | 264.3856536 | 264.3699728 | 264.365048 | 264.397664 | 264.3767664 |
| 11/14/2013 1:30 | 0 | 264.3856536 | 264.3689728 | 264.366048 | 264.396664 | 264.3747664 |
| 11/14/2013 1:40 | 0 | 264.3853488 | 264.3669728 | 264.365048 | 264.396664 | 264.3747664 |
| 11/14/2013 1:50 | 0 | 264.3853488 | 264.3699728 | 264.366048 | 264.399664 | 264.3757664 |
| 11/14/2013 2:00 | 0 | 264.3853488 | 264.3689728 | 264.365048 | 264.395664 | 264.3737664 |
| 11/14/2013 2:10 | 0 | 264.3847392 | 264.3669728 | 264.365048 | 264.395664 | 264.3737664 |
| 11/14/2013 2:20 | 0 | 264.3844344 | 264.3679728 | 264.367048 | 264.398664 | 264.3767664 |
| 11/14/2013 2:30 | 0 | 264.3841296 | 264.3669728 | 264.365048 | 264.395664 | 264.3717664 |
| 11/14/2013 2:40 | 0 | 264.3841296 | 264.3679728 | 264.365048 | 264.394664 | 264.3727664 |
| 11/14/2013 2:50 | 0 | 264.3841296 | 264.3659728 | 264.364048 | 264.396664 | 264.3747664 |
| 11/14/2013 3:00 | 0 | 264.3838248 | 264.3679728 | 264.364048 | 264.396664 | 264.3747664 |
| 11/14/2013 3:10 | 0 | 264.3838248 | 264.3679728 | 264.364048 | 264.396664 | 264.3747664 |
| 11/14/2013 3:20 | 0 | 264.38352   | 264.3639728 | 264.363048 | 264.394664 | 264.3717664 |
| 11/14/2013 3:30 | 0 | 264.3832152 | 264.3629728 | 264.362048 | 264.396664 | 264.3727664 |
| 11/14/2013 3:40 | 0 | 264.3829104 | 264.3639728 | 264.363048 | 264.396664 | 264.3737664 |
| 11/14/2013 3:50 | 0 | 264.3832152 | 264.3639728 | 264.363048 | 264.394664 | 264.3707664 |
| 11/14/2013 4:00 | 0 | 264.3826056 | 264.3619728 | 264.360048 | 264.394664 | 264.3707664 |
| 11/14/2013 4:10 | 0 | 264.3829104 | 264.3639728 | 264.360048 | 264.395664 | 264.3717664 |
| 11/14/2013 4:20 | 0 | 264.3823008 | 264.3639728 | 264.360048 | 264.394664 | 264.3707664 |
| 11/14/2013 4:30 | 0 | 264.381996  | 264.3619728 | 264.362048 | 264.397664 | 264.3737664 |
| 11/14/2013 4:40 | 0 | 264.381996  | 264.3629728 | 264.362048 | 264.396664 | 264.3727664 |
| 11/14/2013 4:50 | 0 | 264.3816912 | 264.3629728 | 264.360048 | 264.396664 | 264.3707664 |
| 11/14/2013 5:00 | 0 | 264.3816912 | 264.3639728 | 264.362048 | 264.396664 | 264.3727664 |
| 11/14/2013 5:10 | 0 | 264.3816912 | 264.3629728 | 264.360048 | 264.396664 | 264.3707664 |
| 11/14/2013 5:20 | 0 | 264.3813864 | 264.3629728 | 264.360048 | 264.394664 | 264.3707664 |
| 11/14/2013 5:30 | 0 | 264.3813864 | 264.3609728 | 264.360048 | 264.392664 | 264.3727664 |
| 11/14/2013 5:40 | 0 | 264.3807768 | 264.3609728 | 264.359048 | 264.394664 | 264.3707664 |
| 11/14/2013 5:50 | 0 | 264.3807768 | 264.3609728 | 264.360048 | 264.394664 | 264.3707664 |
| 11/14/2013 6:00 | 0 | 264.380472  | 264.3609728 | 264.360048 | 264.394664 | 264.3707664 |
| 11/14/2013 6:10 | 0 | 264.3801672 | 264.3599728 | 264.360048 | 264.395664 | 264.3717664 |
| 11/14/2013 6:20 | 0 | 264.3801672 | 264.3589728 | 264.358048 | 264.394664 | 264.3687664 |
| 11/14/2013 6:30 | 0 | 264.3798624 | 264.3589728 | 264.358048 | 264.394664 | 264.3707664 |
| 11/14/2013 6:40 | 0 | 264.3795576 | 264.3579728 | 264.359048 | 264.395664 | 264.3687664 |
| 11/14/2013 6:50 | 0 | 264.3792528 | 264.3549728 | 264.355048 | 264.392664 | 264.3687664 |
| 11/14/2013 7:00 | 0 | 264.378948  | 264.3549728 | 264.355048 | 264.394664 | 264.3687664 |
| 11/14/2013 7:10 | 0 | 264.378948  | 264.3569728 | 264.356048 | 264.395664 | 264.3667664 |
| 11/14/2013 7:20 | 0 | 264.3783384 | 264.3559728 | 264.355048 | 264.397664 | 264.3677664 |
| 11/14/2013 7:30 | 0 | 264.3780336 | 264.3549728 | 264.356048 | 264.393664 | 264.3687664 |
| 11/14/2013 7:40 | 0 | 264.3780336 | 264.3519728 | 264.354048 | 264.394664 | 264.3667664 |
| 11/14/2013 7:50 | 0 | 264.3777288 | 264.3549728 | 264.354048 | 264.392664 | 264.3667664 |
| 11/14/2013 8:00 | 0 | 264.377424  | 264.3529728 | 264.352048 | 264.393664 | 264.3667664 |
| 11/14/2013 8:10 | 0 | 264.3771192 | 264.3539728 | 264.352048 | 264.390664 | 264.3637664 |
| 11/14/2013 8:20 | 0 | 264.377424  | 264.3519728 | 264.354048 | 264.392664 | 264.3647664 |
| 11/14/2013 8:30 | 0 | 264.3771192 | 264.3519728 | 264.352048 | 264.392664 | 264.3647664 |
| 11/14/2013 8:40 | 0 | 264.3768144 | 264.3549728 | 264.355048 | 264.392664 | 264.3647664 |
| 11/14/2013 8:50 | 0 | 264.377424  | 264.3549728 | 264.353048 | 264.390664 | 264.3667664 |
| 11/14/2013 9:00 | 0 | 264.3768144 | 264.3539728 | 264.353048 | 264.389664 | 264.3637664 |



|                  |   |             |             |            |            |             |
|------------------|---|-------------|-------------|------------|------------|-------------|
| 11/14/2013 9:10  | 0 | 264.3768144 | 264.3539728 | 264.355048 | 264.391664 | 264.3657664 |
| 11/14/2013 9:20  | 0 | 264.3765096 | 264.3529728 | 264.353048 | 264.388664 | 264.3647664 |
| 11/14/2013 9:30  | 0 | 264.3765096 | 264.3539728 | 264.353048 | 264.391664 | 264.3657664 |
| 11/14/2013 9:40  | 0 | 264.3765096 | 264.3509728 | 264.350048 | 264.388664 | 264.3647664 |
| 11/14/2013 9:50  | 0 | 264.3765096 | 264.3519728 | 264.354048 | 264.390664 | 264.3637664 |
| 11/14/2013 10:00 | 0 | 264.3762048 | 264.3549728 | 264.353048 | 264.389664 | 264.3657664 |
| 11/14/2013 10:10 | 0 | 264.3768144 | 264.3619728 | 264.354048 | 264.389664 | 264.3657664 |
| 11/14/2013 10:20 | 0 | 264.3777288 | 264.3619728 | 264.357048 | 264.387664 | 264.3667664 |
| 11/14/2013 10:30 | 0 | 264.378948  | 264.3639728 | 264.356048 | 264.388664 | 264.3657664 |
| 11/14/2013 10:40 | 0 | 264.3792528 | 264.3599728 | 264.357048 | 264.391664 | 264.3637664 |
| 11/14/2013 10:50 | 0 | 264.3783384 | 264.3569728 | 264.357048 | 264.389664 | 264.3637664 |
| 11/14/2013 11:00 | 0 | 264.3768144 | 264.3509728 | 264.355048 | 264.389664 | 264.3637664 |
| 11/14/2013 11:10 | 0 | 264.3755952 | 264.3489728 | 264.356048 | 264.389664 | 264.3617664 |
| 11/14/2013 11:20 | 0 | 264.3752904 | 264.3469728 | 264.352048 | 264.391664 | 264.3627664 |
| 11/14/2013 11:30 | 0 | 264.3746808 | 264.3489728 | 264.352048 | 264.389664 | 264.3637664 |
| 11/14/2013 11:40 | 0 | 264.374376  | 264.3449728 | 264.349048 | 264.387664 | 264.3597664 |
| 11/14/2013 11:50 | 0 | 264.3740712 | 264.3469728 | 264.349048 | 264.388664 | 264.3617664 |
| 11/14/2013 12:00 | 0 | 264.3737664 | 264.3459728 | 264.348048 | 264.388664 | 264.3607664 |
| 11/14/2013 12:10 | 0 | 264.3734616 | 264.3449728 | 264.348048 | 264.388664 | 264.3627664 |
| 11/14/2013 12:20 | 0 | 264.3731568 | 264.3449728 | 264.345048 | 264.386664 | 264.3577664 |
| 11/14/2013 12:30 | 0 | 264.3731568 | 264.3459728 | 264.346048 | 264.387664 | 264.3607664 |
| 11/14/2013 12:40 | 0 | 264.3731568 | 264.3459728 | 264.347048 | 264.387664 | 264.3617664 |
| 11/14/2013 12:50 | 0 | 264.372852  | 264.3469728 | 264.346048 | 264.386664 | 264.3587664 |
| 11/14/2013 13:00 | 0 | 264.372852  | 264.3459728 | 264.347048 | 264.389664 | 264.3587664 |
| 11/14/2013 13:10 | 0 | 264.3725472 | 264.3479728 | 264.349048 | 264.387664 | 264.3607664 |
| 11/14/2013 13:20 | 0 | 264.3722424 | 264.3459728 | 264.345048 | 264.387664 | 264.3587664 |
| 11/14/2013 13:30 | 0 | 264.3722424 | 264.3489728 | 264.347048 | 264.386664 | 264.3617664 |
| 11/14/2013 13:40 | 0 | 264.3719376 | 264.3469728 | 264.346048 | 264.387664 | 264.3597664 |
| 11/14/2013 13:50 | 0 | 264.3719376 | 264.3439728 | 264.345048 | 264.386664 | 264.3577664 |
| 11/14/2013 14:00 | 0 | 264.3716328 | 264.3449728 | 264.343048 | 264.387664 | 264.3587664 |
| 11/14/2013 14:10 | 0 | 264.3716328 | 264.3469728 | 264.346048 | 264.387664 | 264.3587664 |
| 11/14/2013 14:20 | 0 | 264.3716328 | 264.3439728 | 264.346048 | 264.387664 | 264.3577664 |
| 11/14/2013 14:30 | 0 | 264.3716328 | 264.3459728 | 264.347048 | 264.388664 | 264.3597664 |
| 11/14/2013 14:40 | 0 | 264.3716328 | 264.3459728 | 264.346048 | 264.385664 | 264.3597664 |
| 11/14/2013 14:50 | 0 | 264.3716328 | 264.3469728 | 264.346048 | 264.387664 | 264.3607664 |
| 11/14/2013 15:00 | 0 | 264.3716328 | 264.3469728 | 264.348048 | 264.387664 | 264.3617664 |
| 11/14/2013 15:10 | 0 | 264.371328  | 264.3459728 | 264.348048 | 264.385664 | 264.3587664 |
| 11/14/2013 15:20 | 0 | 264.371328  | 264.3449728 | 264.345048 | 264.387664 | 264.3607664 |
| 11/14/2013 15:30 | 0 | 264.3710232 | 264.3459728 | 264.346048 | 264.386664 | 264.3597664 |
| 11/14/2013 15:40 | 0 | 264.3710232 | 264.3469728 | 264.347048 | 264.387664 | 264.3597664 |
| 11/14/2013 15:50 | 0 | 264.3710232 | 264.3469728 | 264.346048 | 264.387664 | 264.3597664 |
| 11/14/2013 16:00 | 0 | 264.3710232 | 264.3469728 | 264.348048 | 264.386664 | 264.3577664 |
| 11/14/2013 16:10 | 0 | 264.3710232 | 264.3459728 | 264.348048 | 264.384664 | 264.3597664 |
| 11/14/2013 16:20 | 0 | 264.3710232 | 264.3459728 | 264.346048 | 264.386664 | 264.3587664 |
| 11/14/2013 16:30 | 0 | 264.3710232 | 264.3459728 | 264.346048 | 264.386664 | 264.3597664 |
| 11/14/2013 16:40 | 0 | 264.3707184 | 264.3469728 | 264.345048 | 264.383664 | 264.3587664 |
| 11/14/2013 16:50 | 0 | 264.3707184 | 264.3479728 | 264.349048 | 264.386664 | 264.3577664 |

|                  |   |             |             |            |            |             |
|------------------|---|-------------|-------------|------------|------------|-------------|
| 11/14/2013 17:00 | 0 | 264.3707184 | 264.3479728 | 264.346048 | 264.384664 | 264.3577664 |
| 11/14/2013 17:10 | 0 | 264.3707184 | 264.3499728 | 264.345048 | 264.387664 | 264.3567664 |
| 11/14/2013 17:20 | 0 | 264.3707184 | 264.3469728 | 264.346048 | 264.385664 | 264.3567664 |
| 11/14/2013 17:30 | 0 | 264.3707184 | 264.3479728 | 264.346048 | 264.385664 | 264.3587664 |
| 11/14/2013 17:40 | 0 | 264.3707184 | 264.3479728 | 264.345048 | 264.384664 | 264.3577664 |
| 11/14/2013 17:50 | 0 | 264.3707184 | 264.3469728 | 264.346048 | 264.386664 | 264.3597664 |
| 11/14/2013 18:00 | 0 | 264.3707184 | 264.3479728 | 264.345048 | 264.382664 | 264.3577664 |
| 11/14/2013 18:10 | 0 | 264.3707184 | 264.3469728 | 264.345048 | 264.382664 | 264.3577664 |
| 11/14/2013 18:20 | 0 | 264.3707184 | 264.3469728 | 264.346048 | 264.383664 | 264.3577664 |
| 11/14/2013 18:30 | 0 | 264.3704136 | 264.3449728 | 264.345048 | 264.383664 | 264.3577664 |
| 11/14/2013 18:40 | 0 | 264.3704136 | 264.3499728 | 264.346048 | 264.385664 | 264.3567664 |
| 11/14/2013 18:50 | 0 | 264.3704136 | 264.3479728 | 264.345048 | 264.383664 | 264.3557664 |
| 11/14/2013 19:00 | 0 | 264.3704136 | 264.3479728 | 264.345048 | 264.381664 | 264.3567664 |
| 11/14/2013 19:10 | 0 | 264.3701088 | 264.3479728 | 264.346048 | 264.381664 | 264.3587664 |
| 11/14/2013 19:20 | 0 | 264.3701088 | 264.3479728 | 264.347048 | 264.381664 | 264.3587664 |
| 11/14/2013 19:30 | 0 | 264.3704136 | 264.3469728 | 264.343048 | 264.380664 | 264.3577664 |
| 11/14/2013 19:40 | 0 | 264.3701088 | 264.3479728 | 264.346048 | 264.383664 | 264.3587664 |
| 11/14/2013 19:50 | 0 | 264.3704136 | 264.3479728 | 264.345048 | 264.383664 | 264.3567664 |
| 11/14/2013 20:00 | 0 | 264.3701088 | 264.3469728 | 264.345048 | 264.382664 | 264.3557664 |
| 11/14/2013 20:10 | 0 | 264.3701088 | 264.3459728 | 264.346048 | 264.379664 | 264.3557664 |
| 11/14/2013 20:20 | 0 | 264.3701088 | 264.3459728 | 264.346048 | 264.383664 | 264.3547664 |
| 11/14/2013 20:30 | 0 | 264.3701088 | 264.3439728 | 264.345048 | 264.379664 | 264.3527664 |
| 11/14/2013 20:40 | 0 | 264.3701088 | 264.3459728 | 264.345048 | 264.379664 | 264.3547664 |
| 11/14/2013 20:50 | 0 | 264.3701088 | 264.3459728 | 264.346048 | 264.383664 | 264.3547664 |
| 11/14/2013 21:00 | 0 | 264.3701088 | 264.3469728 | 264.346048 | 264.380664 | 264.3537664 |
| 11/14/2013 21:10 | 0 | 264.3701088 | 264.3439728 | 264.343048 | 264.377664 | 264.3527664 |
| 11/14/2013 21:20 | 0 | 264.3701088 | 264.3469728 | 264.346048 | 264.380664 | 264.3557664 |
| 11/14/2013 21:30 | 0 | 264.3701088 | 264.3469728 | 264.347048 | 264.381664 | 264.3567664 |
| 11/14/2013 21:40 | 0 | 264.369804  | 264.3469728 | 264.347048 | 264.381664 | 264.3567664 |
| 11/14/2013 21:50 | 0 | 264.369804  | 264.3469728 | 264.346048 | 264.381664 | 264.3557664 |
| 11/14/2013 22:00 | 0 | 264.3701088 | 264.3449728 | 264.345048 | 264.378664 | 264.3537664 |
| 11/14/2013 22:10 | 0 | 264.3701088 | 264.3449728 | 264.345048 | 264.379664 | 264.3537664 |
| 11/14/2013 22:20 | 0 | 264.3701088 | 264.3449728 | 264.346048 | 264.378664 | 264.3557664 |
| 11/14/2013 22:30 | 0 | 264.3701088 | 264.3449728 | 264.345048 | 264.375664 | 264.3537664 |
| 11/14/2013 22:40 | 0 | 264.3701088 | 264.3449728 | 264.345048 | 264.379664 | 264.3537664 |
| 11/14/2013 22:50 | 0 | 264.3701088 | 264.3479728 | 264.347048 | 264.378664 | 264.3557664 |
| 11/14/2013 23:00 | 0 | 264.3701088 | 264.3469728 | 264.346048 | 264.377664 | 264.3537664 |
| 11/14/2013 23:10 | 0 | 264.3701088 | 264.3449728 | 264.347048 | 264.380664 | 264.3537664 |
| 11/14/2013 23:20 | 0 | 264.3701088 | 264.3469728 | 264.346048 | 264.378664 | 264.3537664 |
| 11/14/2013 23:30 | 0 | 264.3701088 | 264.3469728 | 264.346048 | 264.378664 | 264.3557664 |
| 11/14/2013 23:40 | 0 | 264.3704136 | 264.3479728 | 264.345048 | 264.377664 | 264.3527664 |
| 11/14/2013 23:50 | 0 | 264.3701088 | 264.3489728 | 264.349048 | 264.379664 | 264.3547664 |
| 11/15/2013 0:00  | 0 | 264.3704136 | 264.3479728 | 264.347048 | 264.378664 | 264.3547664 |
| 11/15/2013 0:10  | 0 | 264.3701088 | 264.3489728 | 264.350048 | 264.381664 | 264.3567664 |
| 11/15/2013 0:20  | 0 | 264.3701088 | 264.3459728 | 264.347048 | 264.380664 | 264.3567664 |
| 11/15/2013 0:30  | 0 | 264.3704136 | 264.3489728 | 264.349048 | 264.381664 | 264.3567664 |
| 11/15/2013 0:40  | 0 | 264.3701088 | 264.3479728 | 264.349048 | 264.378664 | 264.3547664 |

|                 |   |             |             |            |            |             |
|-----------------|---|-------------|-------------|------------|------------|-------------|
| 11/15/2013 0:50 | 0 | 264.3701088 | 264.3479728 | 264.347048 | 264.378664 | 264.3567664 |
| 11/15/2013 1:00 | 0 | 264.3701088 | 264.3499728 | 264.349048 | 264.382664 | 264.3567664 |
| 11/15/2013 1:10 | 0 | 264.3701088 | 264.3489728 | 264.346048 | 264.375664 | 264.3527664 |
| 11/15/2013 1:20 | 0 | 264.3701088 | 264.3479728 | 264.349048 | 264.378664 | 264.3557664 |
| 11/15/2013 1:30 | 0 | 264.3701088 | 264.3499728 | 264.347048 | 264.377664 | 264.3557664 |
| 11/15/2013 1:40 | 0 | 264.3701088 | 264.3479728 | 264.346048 | 264.379664 | 264.3557664 |
| 11/15/2013 1:50 | 0 | 264.3701088 | 264.3479728 | 264.345048 | 264.377664 | 264.3557664 |
| 11/15/2013 2:00 | 0 | 264.3701088 | 264.3499728 | 264.347048 | 264.376664 | 264.3567664 |
| 11/15/2013 2:10 | 0 | 264.369804  | 264.3479728 | 264.347048 | 264.376664 | 264.3547664 |
| 11/15/2013 2:20 | 0 | 264.369804  | 264.3469728 | 264.343048 | 264.375664 | 264.3537664 |
| 11/15/2013 2:30 | 0 | 264.3701088 | 264.3469728 | 264.345048 | 264.377664 | 264.3537664 |
| 11/15/2013 2:40 | 0 | 264.369804  | 264.3479728 | 264.346048 | 264.375664 | 264.3537664 |
| 11/15/2013 2:50 | 0 | 264.3701088 | 264.3469728 | 264.345048 | 264.377664 | 264.3557664 |
| 11/15/2013 3:00 | 0 | 264.369804  | 264.3469728 | 264.346048 | 264.377664 | 264.3527664 |
| 11/15/2013 3:10 | 0 | 264.369804  | 264.3449728 | 264.345048 | 264.375664 | 264.3537664 |
| 11/15/2013 3:20 | 0 | 264.369804  | 264.3469728 | 264.346048 | 264.375664 | 264.3537664 |
| 11/15/2013 3:30 | 0 | 264.369804  | 264.3469728 | 264.347048 | 264.375664 | 264.3517664 |
| 11/15/2013 3:40 | 0 | 264.369804  | 264.3469728 | 264.346048 | 264.374664 | 264.3527664 |
| 11/15/2013 3:50 | 0 | 264.369804  | 264.3439728 | 264.344048 | 264.372664 | 264.3527664 |
| 11/15/2013 4:00 | 0 | 264.369804  | 264.3459728 | 264.346048 | 264.377664 | 264.3547664 |
| 11/15/2013 4:10 | 0 | 264.3694992 | 264.3449728 | 264.344048 | 264.375664 | 264.3537664 |
| 11/15/2013 4:20 | 0 | 264.3694992 | 264.3429728 | 264.345048 | 264.377664 | 264.3537664 |
| 11/15/2013 4:30 | 0 | 264.3694992 | 264.3449728 | 264.346048 | 264.374664 | 264.3527664 |
| 11/15/2013 4:40 | 0 | 264.3691944 | 264.3429728 | 264.344048 | 264.373664 | 264.3517664 |
| 11/15/2013 4:50 | 0 | 264.3691944 | 264.3459728 | 264.345048 | 264.374664 | 264.3527664 |
| 11/15/2013 5:00 | 0 | 264.3688896 | 264.3419728 | 264.344048 | 264.375664 | 264.3507664 |
| 11/15/2013 5:10 | 0 | 264.3688896 | 264.3449728 | 264.344048 | 264.377664 | 264.3497664 |
| 11/15/2013 5:20 | 0 | 264.3688896 | 264.3429728 | 264.343048 | 264.373664 | 264.3507664 |
| 11/15/2013 5:30 | 0 | 264.3685848 | 264.3429728 | 264.343048 | 264.375664 | 264.3507664 |
| 11/15/2013 5:40 | 0 | 264.3685848 | 264.3429728 | 264.343048 | 264.375664 | 264.3517664 |
| 11/15/2013 5:50 | 0 | 264.3685848 | 264.3449728 | 264.346048 | 264.377664 | 264.3517664 |
| 11/15/2013 6:00 | 0 | 264.36828   | 264.3419728 | 264.342048 | 264.375664 | 264.3517664 |
| 11/15/2013 6:10 | 0 | 264.36828   | 264.3409728 | 264.340048 | 264.375664 | 264.3497664 |
| 11/15/2013 6:20 | 0 | 264.3679752 | 264.3459728 | 264.343048 | 264.376664 | 264.3527664 |
| 11/15/2013 6:30 | 0 | 264.3679752 | 264.3439728 | 264.343048 | 264.375664 | 264.3517664 |
| 11/15/2013 6:40 | 0 | 264.3679752 | 264.3439728 | 264.343048 | 264.375664 | 264.3497664 |
| 11/15/2013 6:50 | 0 | 264.3679752 | 264.3429728 | 264.343048 | 264.374664 | 264.3507664 |
| 11/15/2013 7:00 | 0 | 264.3679752 | 264.3409728 | 264.342048 | 264.371664 | 264.3477664 |
| 11/15/2013 7:10 | 0 | 264.3679752 | 264.3449728 | 264.343048 | 264.373664 | 264.3497664 |
| 11/15/2013 7:20 | 0 | 264.36828   | 264.3429728 | 264.342048 | 264.372664 | 264.3507664 |
| 11/15/2013 7:30 | 0 | 264.36828   | 264.3449728 | 264.343048 | 264.374664 | 264.3507664 |
| 11/15/2013 7:40 | 0 | 264.36828   | 264.3449728 | 264.344048 | 264.374664 | 264.3507664 |
| 11/15/2013 7:50 | 0 | 264.36828   | 264.3439728 | 264.343048 | 264.374664 | 264.3487664 |
| 11/15/2013 8:00 | 0 | 264.36828   | 264.3449728 | 264.346048 | 264.374664 | 264.3517664 |
| 11/15/2013 8:10 | 0 | 264.36828   | 264.3439728 | 264.344048 | 264.372664 | 264.3507664 |
| 11/15/2013 8:20 | 0 | 264.36828   | 264.3459728 | 264.343048 | 264.373664 | 264.3497664 |
| 11/15/2013 8:30 | 0 | 264.3685848 | 264.3439728 | 264.343048 | 264.373664 | 264.3477664 |

|                  |   |             |             |            |            |             |
|------------------|---|-------------|-------------|------------|------------|-------------|
| 11/15/2013 8:40  | 0 | 264.3685848 | 264.3439728 | 264.344048 | 264.371664 | 264.3497664 |
| 11/15/2013 8:50  | 0 | 264.3685848 | 264.3509728 | 264.344048 | 264.374664 | 264.3497664 |
| 11/15/2013 9:00  | 0 | 264.3704136 | 264.3609728 | 264.348048 | 264.372664 | 264.3537664 |
| 11/15/2013 9:10  | 0 | 264.374376  | 264.3759728 | 264.353048 | 264.371664 | 264.3587664 |
| 11/15/2013 9:20  | 0 | 264.3810816 | 264.3879728 | 264.363048 | 264.371664 | 264.3647664 |
| 11/15/2013 9:30  | 0 | 264.3883968 | 264.3889728 | 264.369048 | 264.369664 | 264.3657664 |
| 11/15/2013 9:40  | 0 | 264.3902256 | 264.3789728 | 264.374048 | 264.372664 | 264.3657664 |
| 11/15/2013 9:50  | 0 | 264.3887016 | 264.3739728 | 264.374048 | 264.372664 | 264.3637664 |
| 11/15/2013 10:00 | 0 | 264.3868728 | 264.3699728 | 264.371048 | 264.371664 | 264.3627664 |
| 11/15/2013 10:10 | 0 | 264.3856536 | 264.3759728 | 264.369048 | 264.372664 | 264.3627664 |
| 11/15/2013 10:20 | 0 | 264.3877872 | 264.3879728 | 264.374048 | 264.370664 | 264.3677664 |
| 11/15/2013 10:30 | 0 | 264.392664  | 264.3929728 | 264.376048 | 264.369664 | 264.3697664 |
| 11/15/2013 10:40 | 0 | 264.3960168 | 264.3969728 | 264.384048 | 264.373664 | 264.3717664 |
| 11/15/2013 10:50 | 0 | 264.3978456 | 264.3939728 | 264.384048 | 264.370664 | 264.3707664 |
| 11/15/2013 11:00 | 0 | 264.39876   | 264.3959728 | 264.389048 | 264.373664 | 264.3737664 |
| 11/15/2013 11:10 | 0 | 264.3993696 | 264.3869728 | 264.388048 | 264.371664 | 264.3717664 |
| 11/15/2013 11:20 | 0 | 264.397236  | 264.3779728 | 264.383048 | 264.371664 | 264.3687664 |
| 11/15/2013 11:30 | 0 | 264.3932736 | 264.3709728 | 264.379048 | 264.371664 | 264.3657664 |
| 11/15/2013 11:40 | 0 | 264.39114   | 264.3849728 | 264.378048 | 264.370664 | 264.3697664 |
| 11/15/2013 11:50 | 0 | 264.3929688 | 264.3869728 | 264.379048 | 264.370664 | 264.3717664 |
| 11/15/2013 12:00 | 0 | 264.3951024 | 264.3899728 | 264.381048 | 264.370664 | 264.3727664 |
| 11/15/2013 12:10 | 0 | 264.3963216 | 264.3899728 | 264.382048 | 264.369664 | 264.3747664 |
| 11/15/2013 12:20 | 0 | 264.397236  | 264.3909728 | 264.385048 | 264.371664 | 264.3757664 |
| 11/15/2013 12:30 | 0 | 264.397236  | 264.3839728 | 264.384048 | 264.372664 | 264.3737664 |
| 11/15/2013 12:40 | 0 | 264.3944928 | 264.3759728 | 264.381048 | 264.368664 | 264.3697664 |
| 11/15/2013 12:50 | 0 | 264.3920544 | 264.3739728 | 264.377048 | 264.370664 | 264.3707664 |
| 11/15/2013 13:00 | 0 | 264.3902256 | 264.3729728 | 264.376048 | 264.373664 | 264.3677664 |
| 11/15/2013 13:10 | 0 | 264.3887016 | 264.3789728 | 264.375048 | 264.373664 | 264.3707664 |
| 11/15/2013 13:20 | 0 | 264.3905304 | 264.3839728 | 264.376048 | 264.372664 | 264.3727664 |
| 11/15/2013 13:30 | 0 | 264.3920544 | 264.3859728 | 264.377048 | 264.370664 | 264.3727664 |
| 11/15/2013 13:40 | 0 | 264.392664  | 264.3839728 | 264.377048 | 264.370664 | 264.3727664 |
| 11/15/2013 13:50 | 0 | 264.3935784 | 264.3849728 | 264.379048 | 264.371664 | 264.3747664 |
| 11/15/2013 14:00 | 0 | 264.3935784 | 264.3809728 | 264.382048 | 264.372664 | 264.3747664 |
| 11/15/2013 14:10 | 0 | 264.3914448 | 264.3749728 | 264.378048 | 264.374664 | 264.3707664 |
| 11/15/2013 14:20 | 0 | 264.3887016 | 264.3699728 | 264.374048 | 264.372664 | 264.3677664 |
| 11/15/2013 14:30 | 0 | 264.386568  | 264.3669728 | 264.370048 | 264.371664 | 264.3667664 |
| 11/15/2013 14:40 | 0 | 264.3844344 | 264.3649728 | 264.368048 | 264.372664 | 264.3657664 |
| 11/15/2013 14:50 | 0 | 264.3826056 | 264.3589728 | 264.366048 | 264.371664 | 264.3647664 |
| 11/15/2013 15:00 | 0 | 264.3795576 | 264.3519728 | 264.359048 | 264.370664 | 264.3587664 |
| 11/15/2013 15:10 | 0 | 264.3762048 | 264.3479728 | 264.355048 | 264.372664 | 264.3567664 |
| 11/15/2013 15:20 | 0 | 264.3740712 | 264.3479728 | 264.352048 | 264.371664 | 264.3577664 |
| 11/15/2013 15:30 | 0 | 264.3725472 | 264.3439728 | 264.348048 | 264.369664 | 264.3577664 |
| 11/15/2013 15:40 | 0 | 264.3716328 | 264.3489728 | 264.351048 | 264.371664 | 264.3597664 |
| 11/15/2013 15:50 | 0 | 264.371328  | 264.3489728 | 264.349048 | 264.370664 | 264.3577664 |
| 11/15/2013 16:00 | 0 | 264.3710232 | 264.3499728 | 264.348048 | 264.372664 | 264.3567664 |
| 11/15/2013 16:10 | 0 | 264.3710232 | 264.3509728 | 264.349048 | 264.372664 | 264.3567664 |
| 11/15/2013 16:20 | 0 | 264.3707184 | 264.3479728 | 264.346048 | 264.370664 | 264.3557664 |

|                  |   |             |             |            |            |             |
|------------------|---|-------------|-------------|------------|------------|-------------|
| 11/15/2013 16:30 | 0 | 264.3707184 | 264.3469728 | 264.348048 | 264.368664 | 264.3557664 |
| 11/15/2013 16:40 | 0 | 264.3701088 | 264.3479728 | 264.348048 | 264.370664 | 264.3547664 |
| 11/15/2013 16:50 | 0 | 264.369804  | 264.3499728 | 264.345048 | 264.368664 | 264.3547664 |
| 11/15/2013 17:00 | 0 | 264.369804  | 264.3509728 | 264.349048 | 264.371664 | 264.3557664 |
| 11/15/2013 17:10 | 0 | 264.369804  | 264.3509728 | 264.348048 | 264.369664 | 264.3537664 |
| 11/15/2013 17:20 | 0 | 264.369804  | 264.3489728 | 264.346048 | 264.367664 | 264.3537664 |
| 11/15/2013 17:30 | 0 | 264.369804  | 264.3619728 | 264.349048 | 264.369664 | 264.3577664 |
| 11/15/2013 17:40 | 0 | 264.3737664 | 264.3779728 | 264.356048 | 264.371664 | 264.3627664 |
| 11/15/2013 17:50 | 0 | 264.3801672 | 264.3829728 | 264.363048 | 264.370664 | 264.3687664 |
| 11/15/2013 18:00 | 0 | 264.3841296 | 264.3809728 | 264.365048 | 264.368664 | 264.3657664 |
| 11/15/2013 18:10 | 0 | 264.386568  | 264.3859728 | 264.372048 | 264.369664 | 264.3677664 |
| 11/15/2013 18:20 | 0 | 264.3877872 | 264.3829728 | 264.373048 | 264.369664 | 264.3687664 |
| 11/15/2013 18:30 | 0 | 264.3887016 | 264.3829728 | 264.376048 | 264.370664 | 264.3667664 |
| 11/15/2013 18:40 | 0 | 264.3890064 | 264.3829728 | 264.376048 | 264.372664 | 264.3677664 |
| 11/15/2013 18:50 | 0 | 264.3893112 | 264.3829728 | 264.376048 | 264.372664 | 264.3687664 |
| 11/15/2013 19:00 | 0 | 264.389616  | 264.3819728 | 264.377048 | 264.372664 | 264.3687664 |
| 11/15/2013 19:10 | 0 | 264.3899208 | 264.3819728 | 264.377048 | 264.370664 | 264.3687664 |
| 11/15/2013 19:20 | 0 | 264.3899208 | 264.3819728 | 264.377048 | 264.369664 | 264.3687664 |
| 11/15/2013 19:30 | 0 | 264.3899208 | 264.3809728 | 264.377048 | 264.371664 | 264.3707664 |
| 11/15/2013 19:40 | 0 | 264.389616  | 264.3799728 | 264.375048 | 264.369664 | 264.3687664 |
| 11/15/2013 19:50 | 0 | 264.389616  | 264.3809728 | 264.375048 | 264.369664 | 264.3707664 |
| 11/15/2013 20:00 | 0 | 264.3893112 | 264.3809728 | 264.376048 | 264.370664 | 264.3697664 |
| 11/15/2013 20:10 | 0 | 264.3893112 | 264.3779728 | 264.375048 | 264.369664 | 264.3687664 |
| 11/15/2013 20:20 | 0 | 264.3893112 | 264.3789728 | 264.377048 | 264.370664 | 264.3717664 |
| 11/15/2013 20:30 | 0 | 264.3890064 | 264.3779728 | 264.375048 | 264.369664 | 264.3687664 |
| 11/15/2013 20:40 | 0 | 264.3887016 | 264.3759728 | 264.373048 | 264.366664 | 264.3677664 |
| 11/15/2013 20:50 | 0 | 264.3883968 | 264.3759728 | 264.372048 | 264.366664 | 264.3677664 |
| 11/15/2013 21:00 | 0 | 264.3877872 | 264.3769728 | 264.374048 | 264.369664 | 264.3677664 |
| 11/15/2013 21:10 | 0 | 264.3877872 | 264.3749728 | 264.369048 | 264.365664 | 264.3667664 |
| 11/15/2013 21:20 | 0 | 264.3874824 | 264.3779728 | 264.373048 | 264.368664 | 264.3697664 |
| 11/15/2013 21:30 | 0 | 264.3871776 | 264.3759728 | 264.372048 | 264.369664 | 264.3677664 |
| 11/15/2013 21:40 | 0 | 264.3871776 | 264.3729728 | 264.370048 | 264.368664 | 264.3677664 |
| 11/15/2013 21:50 | 0 | 264.3871776 | 264.3739728 | 264.370048 | 264.367664 | 264.3667664 |
| 11/15/2013 22:00 | 0 | 264.3871776 | 264.3769728 | 264.370048 | 264.367664 | 264.3687664 |
| 11/15/2013 22:10 | 0 | 264.3868728 | 264.3749728 | 264.371048 | 264.368664 | 264.3667664 |
| 11/15/2013 22:20 | 0 | 264.3868728 | 264.3749728 | 264.371048 | 264.370664 | 264.3697664 |
| 11/15/2013 22:30 | 0 | 264.3871776 | 264.3759728 | 264.371048 | 264.371664 | 264.3677664 |
| 11/15/2013 22:40 | 0 | 264.3871776 | 264.3769728 | 264.371048 | 264.370664 | 264.3677664 |
| 11/15/2013 22:50 | 0 | 264.3871776 | 264.3759728 | 264.371048 | 264.369664 | 264.3727664 |
| 11/15/2013 23:00 | 0 | 264.3871776 | 264.3749728 | 264.371048 | 264.370664 | 264.3697664 |
| 11/15/2013 23:10 | 0 | 264.3868728 | 264.3749728 | 264.371048 | 264.370664 | 264.3697664 |
| 11/15/2013 23:20 | 0 | 264.3868728 | 264.3759728 | 264.371048 | 264.371664 | 264.3697664 |
| 11/15/2013 23:30 | 0 | 264.386568  | 264.3749728 | 264.371048 | 264.371664 | 264.3697664 |
| 11/15/2013 23:40 | 0 | 264.3862632 | 264.3759728 | 264.371048 | 264.372664 | 264.3687664 |
| 11/15/2013 23:50 | 0 | 264.3859584 | 264.3739728 | 264.370048 | 264.372664 | 264.3667664 |
| 11/16/2013 0:00  | 0 | 264.3856536 | 264.3729728 | 264.367048 | 264.369664 | 264.3677664 |
| 11/16/2013 0:10  | 0 | 264.3856536 | 264.3739728 | 264.370048 | 264.370664 | 264.3687664 |

|                 |   |             |             |            |            |             |
|-----------------|---|-------------|-------------|------------|------------|-------------|
| 11/16/2013 0:20 | 0 | 264.3853488 | 264.3739728 | 264.369048 | 264.368664 | 264.3667664 |
| 11/16/2013 0:30 | 0 | 264.3847392 | 264.3729728 | 264.366048 | 264.369664 | 264.3657664 |
| 11/16/2013 0:40 | 0 | 264.3847392 | 264.3729728 | 264.370048 | 264.368664 | 264.3667664 |
| 11/16/2013 0:50 | 0 | 264.3844344 | 264.3739728 | 264.368048 | 264.370664 | 264.3667664 |
| 11/16/2013 1:00 | 0 | 264.3844344 | 264.3729728 | 264.368048 | 264.370664 | 264.3667664 |
| 11/16/2013 1:10 | 0 | 264.3841296 | 264.3719728 | 264.369048 | 264.369664 | 264.3677664 |
| 11/16/2013 1:20 | 0 | 264.3841296 | 264.3719728 | 264.368048 | 264.369664 | 264.3657664 |
| 11/16/2013 1:30 | 0 | 264.3841296 | 264.3729728 | 264.369048 | 264.369664 | 264.3677664 |
| 11/16/2013 1:40 | 0 | 264.3838248 | 264.3699728 | 264.365048 | 264.369664 | 264.3657664 |
| 11/16/2013 1:50 | 0 | 264.3838248 | 264.3729728 | 264.366048 | 264.368664 | 264.3667664 |
| 11/16/2013 2:00 | 0 | 264.38352   | 264.3749728 | 264.367048 | 264.370664 | 264.3647664 |
| 11/16/2013 2:10 | 0 | 264.3838248 | 264.3759728 | 264.368048 | 264.371664 | 264.3677664 |
| 11/16/2013 2:20 | 0 | 264.3838248 | 264.3719728 | 264.367048 | 264.370664 | 264.3677664 |
| 11/16/2013 2:30 | 0 | 264.3832152 | 264.3719728 | 264.367048 | 264.368664 | 264.3657664 |
| 11/16/2013 2:40 | 0 | 264.3832152 | 264.3729728 | 264.367048 | 264.369664 | 264.3667664 |
| 11/16/2013 2:50 | 0 | 264.3829104 | 264.3739728 | 264.370048 | 264.369664 | 264.3657664 |
| 11/16/2013 3:00 | 0 | 264.3829104 | 264.3709728 | 264.367048 | 264.370664 | 264.3657664 |
| 11/16/2013 3:10 | 0 | 264.3826056 | 264.3699728 | 264.367048 | 264.369664 | 264.3647664 |
| 11/16/2013 3:20 | 0 | 264.3823008 | 264.3699728 | 264.367048 | 264.371664 | 264.3667664 |
| 11/16/2013 3:30 | 0 | 264.3823008 | 264.3709728 | 264.366048 | 264.370664 | 264.3657664 |
| 11/16/2013 3:40 | 0 | 264.381996  | 264.3639728 | 264.364048 | 264.370664 | 264.3657664 |
| 11/16/2013 3:50 | 0 | 264.3795576 | 264.3579728 | 264.360048 | 264.370664 | 264.3607664 |
| 11/16/2013 4:00 | 0 | 264.3768144 | 264.3539728 | 264.361048 | 264.369664 | 264.3597664 |
| 11/16/2013 4:10 | 0 | 264.374376  | 264.3519728 | 264.357048 | 264.369664 | 264.3597664 |
| 11/16/2013 4:20 | 0 | 264.3725472 | 264.3469728 | 264.353048 | 264.368664 | 264.3557664 |
| 11/16/2013 4:30 | 0 | 264.371328  | 264.3489728 | 264.349048 | 264.369664 | 264.3587664 |
| 11/16/2013 4:40 | 0 | 264.3701088 | 264.3469728 | 264.346048 | 264.367664 | 264.3567664 |
| 11/16/2013 4:50 | 0 | 264.3694992 | 264.3479728 | 264.346048 | 264.370664 | 264.3537664 |
| 11/16/2013 5:00 | 0 | 264.3691944 | 264.3459728 | 264.345048 | 264.368664 | 264.3557664 |
| 11/16/2013 5:10 | 0 | 264.3685848 | 264.3459728 | 264.344048 | 264.368664 | 264.3537664 |
| 11/16/2013 5:20 | 0 | 264.36828   | 264.3459728 | 264.342048 | 264.367664 | 264.3537664 |
| 11/16/2013 5:30 | 0 | 264.3679752 | 264.3469728 | 264.344048 | 264.369664 | 264.3547664 |
| 11/16/2013 5:40 | 0 | 264.3679752 | 264.3459728 | 264.342048 | 264.369664 | 264.3517664 |
| 11/16/2013 5:50 | 0 | 264.3676704 | 264.3469728 | 264.342048 | 264.370664 | 264.3527664 |
| 11/16/2013 6:00 | 0 | 264.3673656 | 264.3419728 | 264.341048 | 264.365664 | 264.3517664 |
| 11/16/2013 6:10 | 0 | 264.3673656 | 264.3449728 | 264.342048 | 264.368664 | 264.3527664 |
| 11/16/2013 6:20 | 0 | 264.3673656 | 264.3449728 | 264.344048 | 264.367664 | 264.3537664 |
| 11/16/2013 6:30 | 0 | 264.3670608 | 264.3439728 | 264.341048 | 264.369664 | 264.3517664 |
| 11/16/2013 6:40 | 0 | 264.3670608 | 264.3459728 | 264.343048 | 264.366664 | 264.3527664 |
| 11/16/2013 6:50 | 0 | 264.3670608 | 264.3439728 | 264.344048 | 264.368664 | 264.3527664 |
| 11/16/2013 7:00 | 0 | 264.366756  | 264.3429728 | 264.341048 | 264.369664 | 264.3517664 |
| 11/16/2013 7:10 | 0 | 264.366756  | 264.3449728 | 264.342048 | 264.364664 | 264.3507664 |
| 11/16/2013 7:20 | 0 | 264.366756  | 264.3459728 | 264.343048 | 264.367664 | 264.3527664 |
| 11/16/2013 7:30 | 0 | 264.366756  | 264.3439728 | 264.343048 | 264.368664 | 264.3547664 |
| 11/16/2013 7:40 | 0 | 264.3664512 | 264.3459728 | 264.342048 | 264.368664 | 264.3527664 |
| 11/16/2013 7:50 | 0 | 264.366756  | 264.3439728 | 264.342048 | 264.365664 | 264.3507664 |
| 11/16/2013 8:00 | 0 | 264.3664512 | 264.3429728 | 264.341048 | 264.365664 | 264.3497664 |

|                  |        |             |             |            |            |             |
|------------------|--------|-------------|-------------|------------|------------|-------------|
| 11/16/2013 8:10  | 0      | 264.366756  | 264.3429728 | 264.341048 | 264.367664 | 264.3497664 |
| 11/16/2013 8:20  | 0      | 264.366756  | 264.3459728 | 264.341048 | 264.366664 | 264.3487664 |
| 11/16/2013 8:30  | 0      | 264.366756  | 264.3429728 | 264.343048 | 264.366664 | 264.3497664 |
| 11/16/2013 8:40  | 0      | 264.3664512 | 264.3469728 | 264.345048 | 264.367664 | 264.3507664 |
| 11/16/2013 8:50  | 0      | 264.366756  | 264.3439728 | 264.341048 | 264.367664 | 264.3507664 |
| 11/16/2013 9:00  | 0      | 264.366756  | 264.3439728 | 264.344048 | 264.367664 | 264.3487664 |
| 11/16/2013 9:10  | 0      | 264.3664512 | 264.3439728 | 264.344048 | 264.365664 | 264.3497664 |
| 11/16/2013 9:20  | 0      | 264.366756  | 264.3449728 | 264.344048 | 264.365664 | 264.3507664 |
| 11/16/2013 9:30  | 0      | 264.3664512 | 264.3449728 | 264.342048 | 264.365664 | 264.3507664 |
| 11/16/2013 9:40  | 0      | 264.3664512 | 264.3439728 | 264.344048 | 264.366664 | 264.3497664 |
| 11/16/2013 9:50  | 0      | 264.366756  | 264.3439728 | 264.341048 | 264.365664 | 264.3467664 |
| 11/16/2013 10:00 | 0      | 264.366756  | 264.3459728 | 264.344048 | 264.364664 | 264.3497664 |
| 11/16/2013 10:10 | 0      | 264.3670608 | 264.3439728 | 264.343048 | 264.366664 | 264.3477664 |
| 11/16/2013 10:20 | 0      | 264.366756  | 264.3449728 | 264.344048 | 264.366664 | 264.3487664 |
| 11/16/2013 10:30 | 0      | 264.366756  | 264.3429728 | 264.343048 | 264.365664 | 264.3487664 |
| 11/16/2013 10:40 | 0      | 264.366756  | 264.3429728 | 264.340048 | 264.364664 | 264.3477664 |
| 11/16/2013 10:50 | 0      | 264.3664512 | 264.3479728 | 264.344048 | 264.366664 | 264.3517664 |
| 11/16/2013 11:00 | 0      | 264.366756  | 264.3439728 | 264.342048 | 264.364664 | 264.3497664 |
| 11/16/2013 11:10 | 0      | 264.3664512 | 264.3449728 | 264.342048 | 264.365664 | 264.3487664 |
| 11/16/2013 11:20 | 0      | 264.366756  | 264.3449728 | 264.342048 | 264.365664 | 264.3487664 |
| 11/16/2013 11:30 | 0      | 264.3664512 | 264.3449728 | 264.342048 | 264.363664 | 264.3487664 |
| 11/16/2013 11:40 | 0      | 264.3664512 | 264.3449728 | 264.342048 | 264.364664 | 264.3487664 |
| 11/16/2013 11:50 | 0      | 264.3664512 | 264.3459728 | 264.345048 | 264.365664 | 264.3517664 |
| 11/16/2013 12:00 | 0      | 264.366756  | 264.3439728 | 264.343048 | 264.365664 | 264.3487664 |
| 11/16/2013 12:10 | 0      | 264.366756  | 264.3439728 | 264.342048 | 264.366664 | 264.3467664 |
| 11/16/2013 12:20 | 0.0254 | 264.3664512 | 264.3449728 | 264.343048 | 264.364664 | 264.3487664 |
| 11/16/2013 12:30 | 0.0254 | 264.366756  | 264.3449728 | 264.342048 | 264.365664 | 264.3497664 |
| 11/16/2013 12:40 | 0.0254 | 264.366756  | 264.3429728 | 264.341048 | 264.365664 | 264.3467664 |
| 11/16/2013 12:50 | 0.0254 | 264.3664512 | 264.3429728 | 264.344048 | 264.365664 | 264.3497664 |
| 11/16/2013 13:00 | 0.0254 | 264.3664512 | 264.3429728 | 264.341048 | 264.365664 | 264.3477664 |
| 11/16/2013 13:10 | 0.0254 | 264.366756  | 264.3439728 | 264.340048 | 264.365664 | 264.3467664 |
| 11/16/2013 13:20 | 0.0254 | 264.366756  | 264.3409728 | 264.340048 | 264.364664 | 264.3477664 |
| 11/16/2013 13:30 | 0.0254 | 264.366756  | 264.3439728 | 264.340048 | 264.365664 | 264.3497664 |
| 11/16/2013 13:40 | 0.0254 | 264.3670608 | 264.3449728 | 264.340048 | 264.364664 | 264.3487664 |
| 11/16/2013 13:50 | 0.0254 | 264.3670608 | 264.3439728 | 264.342048 | 264.363664 | 264.3497664 |
| 11/16/2013 14:00 | 0.0254 | 264.3664512 | 264.3429728 | 264.342048 | 264.364664 | 264.3457664 |
| 11/16/2013 14:10 | 0.0254 | 264.366756  | 264.3439728 | 264.343048 | 264.363664 | 264.3487664 |
| 11/16/2013 14:20 | 0.0254 | 264.366756  | 264.3429728 | 264.342048 | 264.362664 | 264.3467664 |
| 11/16/2013 14:30 | 0.0254 | 264.366756  | 264.3459728 | 264.341048 | 264.363664 | 264.3467664 |
| 11/16/2013 14:40 | 0.0254 | 264.3673656 | 264.3449728 | 264.341048 | 264.364664 | 264.3477664 |
| 11/16/2013 14:50 | 0.0254 | 264.3664512 | 264.3439728 | 264.342048 | 264.363664 | 264.3447664 |
| 11/16/2013 15:00 | 0.0254 | 264.366756  | 264.3439728 | 264.342048 | 264.363664 | 264.3467664 |
| 11/16/2013 15:10 | 0.0254 | 264.366756  | 264.3449728 | 264.343048 | 264.364664 | 264.3477664 |
| 11/16/2013 15:20 | 0.0254 | 264.3670608 | 264.3449728 | 264.342048 | 264.360664 | 264.3477664 |
| 11/16/2013 15:30 | 0.0254 | 264.3670608 | 264.3479728 | 264.343048 | 264.364664 | 264.3497664 |
| 11/16/2013 15:40 | 0.0254 | 264.3670608 | 264.3459728 | 264.343048 | 264.363664 | 264.3477664 |
| 11/16/2013 15:50 | 0.0254 | 264.3670608 | 264.3459728 | 264.341048 | 264.364664 | 264.3467664 |

|                  |        |             |             |            |            |             |
|------------------|--------|-------------|-------------|------------|------------|-------------|
| 11/16/2013 16:00 | 0.0254 | 264.366756  | 264.3479728 | 264.344048 | 264.363664 | 264.3487664 |
| 11/16/2013 16:10 | 0.0254 | 264.3670608 | 264.3449728 | 264.342048 | 264.363664 | 264.3457664 |
| 11/16/2013 16:20 | 0.0254 | 264.3673656 | 264.3469728 | 264.343048 | 264.363664 | 264.3467664 |
| 11/16/2013 16:30 | 0.0254 | 264.3670608 | 264.3479728 | 264.342048 | 264.363664 | 264.3457664 |
| 11/16/2013 16:40 | 0.0254 | 264.3670608 | 264.3439728 | 264.345048 | 264.360664 | 264.3477664 |
| 11/16/2013 16:50 | 0.0254 | 264.3670608 | 264.3479728 | 264.345048 | 264.363664 | 264.3487664 |
| 11/16/2013 17:00 | 0.0254 | 264.3673656 | 264.3449728 | 264.342048 | 264.362664 | 264.3477664 |
| 11/16/2013 17:10 | 0.0254 | 264.3670608 | 264.3439728 | 264.341048 | 264.360664 | 264.3477664 |
| 11/16/2013 17:20 | 0.0254 | 264.3673656 | 264.3469728 | 264.342048 | 264.362664 | 264.3467664 |
| 11/16/2013 17:30 | 0.0254 | 264.3673656 | 264.3479728 | 264.342048 | 264.361664 | 264.3467664 |
| 11/16/2013 17:40 | 0.0254 | 264.3673656 | 264.3449728 | 264.342048 | 264.360664 | 264.3457664 |
| 11/16/2013 17:50 | 0.0254 | 264.3673656 | 264.3449728 | 264.342048 | 264.362664 | 264.3457664 |
| 11/16/2013 18:00 | 0.0254 | 264.3676704 | 264.3459728 | 264.343048 | 264.361664 | 264.3467664 |
| 11/16/2013 18:10 | 0.0254 | 264.3676704 | 264.3469728 | 264.343048 | 264.362664 | 264.3477664 |
| 11/16/2013 18:20 | 0.0254 | 264.3673656 | 264.3469728 | 264.343048 | 264.361664 | 264.3457664 |
| 11/16/2013 18:30 | 0.0254 | 264.3673656 | 264.3439728 | 264.342048 | 264.360664 | 264.3437664 |
| 11/16/2013 18:40 | 0.0254 | 264.3673656 | 264.3479728 | 264.343048 | 264.360664 | 264.3467664 |
| 11/16/2013 18:50 | 0.0254 | 264.3673656 | 264.3459728 | 264.343048 | 264.362664 | 264.3477664 |
| 11/16/2013 19:00 | 0.0254 | 264.3673656 | 264.3469728 | 264.344048 | 264.359664 | 264.3457664 |
| 11/16/2013 19:10 | 0.0254 | 264.3676704 | 264.3479728 | 264.344048 | 264.361664 | 264.3457664 |
| 11/16/2013 19:20 | 0.0254 | 264.3676704 | 264.3459728 | 264.343048 | 264.362664 | 264.3447664 |
| 11/16/2013 19:30 | 0.0254 | 264.3676704 | 264.3469728 | 264.344048 | 264.360664 | 264.3467664 |
| 11/16/2013 19:40 | 0.0254 | 264.3676704 | 264.3469728 | 264.344048 | 264.360664 | 264.3467664 |
| 11/16/2013 19:50 | 0.0254 | 264.3679752 | 264.3479728 | 264.345048 | 264.359664 | 264.3457664 |
| 11/16/2013 20:00 | 0.0254 | 264.3679752 | 264.3459728 | 264.343048 | 264.361664 | 264.3457664 |
| 11/16/2013 20:10 | 0.0254 | 264.3679752 | 264.3469728 | 264.344048 | 264.360664 | 264.3447664 |
| 11/16/2013 20:20 | 0.0254 | 264.3676704 | 264.3449728 | 264.341048 | 264.358664 | 264.3447664 |
| 11/16/2013 20:30 | 0.0254 | 264.3676704 | 264.3459728 | 264.342048 | 264.359664 | 264.3427664 |
| 11/16/2013 20:40 | 0.0254 | 264.3676704 | 264.3479728 | 264.344048 | 264.359664 | 264.3457664 |
| 11/16/2013 20:50 | 0.0254 | 264.3676704 | 264.3479728 | 264.343048 | 264.361664 | 264.3447664 |
| 11/16/2013 21:00 | 0.0254 | 264.3676704 | 264.3479728 | 264.343048 | 264.361664 | 264.3457664 |
| 11/16/2013 21:10 | 0.0254 | 264.3679752 | 264.3479728 | 264.343048 | 264.361664 | 264.3457664 |
| 11/16/2013 21:20 | 0.0254 | 264.3676704 | 264.3479728 | 264.344048 | 264.360664 | 264.3447664 |
| 11/16/2013 21:30 | 0.0254 | 264.3676704 | 264.3469728 | 264.343048 | 264.359664 | 264.3447664 |
| 11/16/2013 21:40 | 0.0254 | 264.3676704 | 264.3449728 | 264.342048 | 264.358664 | 264.3437664 |
| 11/16/2013 21:50 | 0.0254 | 264.3676704 | 264.3469728 | 264.343048 | 264.362664 | 264.3437664 |
| 11/16/2013 22:00 | 0.0254 | 264.3679752 | 264.3469728 | 264.345048 | 264.361664 | 264.3457664 |
| 11/16/2013 22:10 | 0.0254 | 264.3676704 | 264.3469728 | 264.345048 | 264.360664 | 264.3457664 |
| 11/16/2013 22:20 | 0.0254 | 264.3679752 | 264.3469728 | 264.345048 | 264.359664 | 264.3447664 |
| 11/16/2013 22:30 | 0.0254 | 264.3679752 | 264.3469728 | 264.342048 | 264.361664 | 264.3447664 |
| 11/16/2013 22:40 | 0.0254 | 264.3679752 | 264.3459728 | 264.343048 | 264.360664 | 264.3457664 |
| 11/16/2013 22:50 | 0.0254 | 264.3679752 | 264.3459728 | 264.344048 | 264.358664 | 264.3457664 |
| 11/16/2013 23:00 | 0.0254 | 264.3679752 | 264.3459728 | 264.344048 | 264.357664 | 264.3457664 |
| 11/16/2013 23:10 | 0.0254 | 264.3679752 | 264.3479728 | 264.344048 | 264.360664 | 264.3457664 |
| 11/16/2013 23:20 | 0.0254 | 264.3679752 | 264.3459728 | 264.344048 | 264.359664 | 264.3457664 |
| 11/16/2013 23:30 | 0.0254 | 264.3679752 | 264.3459728 | 264.342048 | 264.359664 | 264.3457664 |
| 11/16/2013 23:40 | 0.0254 | 264.36828   | 264.3469728 | 264.344048 | 264.361664 | 264.3457664 |



|                  |        |             |             |            |            |             |
|------------------|--------|-------------|-------------|------------|------------|-------------|
| 11/16/2013 23:50 | 0.0254 | 264.3679752 | 264.3459728 | 264.345048 | 264.360664 | 264.3477664 |
| 11/17/2013 0:00  | 0      | 264.3679752 | 264.3459728 | 264.344048 | 264.358664 | 264.3457664 |
| 11/17/2013 0:10  | 0      | 264.3679752 | 264.3459728 | 264.342048 | 264.360664 | 264.3457664 |
| 11/17/2013 0:20  | 0      | 264.3676704 | 264.3469728 | 264.344048 | 264.358664 | 264.3457664 |
| 11/17/2013 0:30  | 0      | 264.3676704 | 264.3449728 | 264.344048 | 264.360664 | 264.3447664 |
| 11/17/2013 0:40  | 0      | 264.3673656 | 264.3449728 | 264.344048 | 264.358664 | 264.3447664 |
| 11/17/2013 0:50  | 0      | 264.3670608 | 264.3459728 | 264.345048 | 264.360664 | 264.3457664 |
| 11/17/2013 1:00  | 0      | 264.3670608 | 264.3449728 | 264.344048 | 264.358664 | 264.3447664 |
| 11/17/2013 1:10  | 0      | 264.3670608 | 264.3439728 | 264.344048 | 264.359664 | 264.3467664 |
| 11/17/2013 1:20  | 0      | 264.3670608 | 264.3439728 | 264.341048 | 264.360664 | 264.3427664 |
| 11/17/2013 1:30  | 0      | 264.366756  | 264.3429728 | 264.344048 | 264.359664 | 264.3457664 |
| 11/17/2013 1:40  | 0      | 264.366756  | 264.3429728 | 264.343048 | 264.359664 | 264.3457664 |
| 11/17/2013 1:50  | 0      | 264.366756  | 264.3459728 | 264.340048 | 264.357664 | 264.3457664 |
| 11/17/2013 2:00  | 0      | 264.366756  | 264.3429728 | 264.340048 | 264.358664 | 264.3437664 |
| 11/17/2013 2:10  | 0      | 264.366756  | 264.3449728 | 264.341048 | 264.360664 | 264.3457664 |
| 11/17/2013 2:20  | 0      | 264.366756  | 264.3449728 | 264.343048 | 264.359664 | 264.3457664 |
| 11/17/2013 2:30  | 0      | 264.366756  | 264.3439728 | 264.341048 | 264.360664 | 264.3467664 |
| 11/17/2013 2:40  | 0      | 264.366756  | 264.3439728 | 264.341048 | 264.360664 | 264.3437664 |
| 11/17/2013 2:50  | 0      | 264.3670608 | 264.3449728 | 264.343048 | 264.358664 | 264.3447664 |
| 11/17/2013 3:00  | 0      | 264.3673656 | 264.3439728 | 264.343048 | 264.360664 | 264.3467664 |
| 11/17/2013 3:10  | 0      | 264.3673656 | 264.3459728 | 264.344048 | 264.358664 | 264.3447664 |
| 11/17/2013 3:20  | 0      | 264.3673656 | 264.3459728 | 264.343048 | 264.359664 | 264.3457664 |
| 11/17/2013 3:30  | 0.0254 | 264.3676704 | 264.3469728 | 264.344048 | 264.360664 | 264.3467664 |
| 11/17/2013 3:40  | 0.0254 | 264.3673656 | 264.3469728 | 264.344048 | 264.360664 | 264.3467664 |
| 11/17/2013 3:50  | 0.0254 | 264.3676704 | 264.3459728 | 264.343048 | 264.358664 | 264.3447664 |
| 11/17/2013 4:00  | 0.0254 | 264.3673656 | 264.3459728 | 264.343048 | 264.359664 | 264.3457664 |
| 11/17/2013 4:10  | 0.0254 | 264.3676704 | 264.3459728 | 264.342048 | 264.357664 | 264.3437664 |
| 11/17/2013 4:20  | 0.0254 | 264.3679752 | 264.3459728 | 264.342048 | 264.359664 | 264.3457664 |
| 11/17/2013 4:30  | 0.0254 | 264.3685848 | 264.3469728 | 264.345048 | 264.357664 | 264.3457664 |
| 11/17/2013 4:40  | 0.0254 | 264.3685848 | 264.3479728 | 264.345048 | 264.356664 | 264.3467664 |
| 11/17/2013 4:50  | 0.0254 | 264.3688896 | 264.3479728 | 264.343048 | 264.358664 | 264.3447664 |
| 11/17/2013 5:00  | 0.0508 | 264.36828   | 264.3459728 | 264.345048 | 264.360664 | 264.3467664 |
| 11/17/2013 5:10  | 0.0508 | 264.36828   | 264.3509728 | 264.346048 | 264.359664 | 264.3477664 |
| 11/17/2013 5:20  | 0.0508 | 264.36828   | 264.3479728 | 264.343048 | 264.356664 | 264.3457664 |
| 11/17/2013 5:30  | 0.0508 | 264.36828   | 264.3489728 | 264.346048 | 264.358664 | 264.3477664 |
| 11/17/2013 5:40  | 0.0508 | 264.36828   | 264.3479728 | 264.345048 | 264.357664 | 264.3457664 |
| 11/17/2013 5:50  | 0.0508 | 264.36828   | 264.3479728 | 264.344048 | 264.359664 | 264.3457664 |
| 11/17/2013 6:00  | 0.0508 | 264.36828   | 264.3489728 | 264.346048 | 264.361664 | 264.3477664 |
| 11/17/2013 6:10  | 0.0508 | 264.3685848 | 264.3499728 | 264.345048 | 264.359664 | 264.3477664 |
| 11/17/2013 6:20  | 0.0508 | 264.3688896 | 264.3489728 | 264.345048 | 264.359664 | 264.3457664 |
| 11/17/2013 6:30  | 0.127  | 264.3688896 | 264.3459728 | 264.344048 | 264.356664 | 264.3467664 |
| 11/17/2013 6:40  | 0.2032 | 264.3688896 | 264.3469728 | 264.344048 | 264.354664 | 264.3467664 |
| 11/17/2013 6:50  | 0.3302 | 264.3688896 | 264.3459728 | 264.344048 | 264.357664 | 264.3467664 |
| 11/17/2013 7:00  | 0.3556 | 264.3688896 | 264.3489728 | 264.344048 | 264.354664 | 264.3447664 |
| 11/17/2013 7:10  | 0.381  | 264.3688896 | 264.3459728 | 264.341048 | 264.355664 | 264.3427664 |
| 11/17/2013 7:20  | 0.381  | 264.3685848 | 264.3459728 | 264.341048 | 264.355664 | 264.3437664 |
| 11/17/2013 7:30  | 0.4064 | 264.36828   | 264.3479728 | 264.343048 | 264.357664 | 264.3457664 |

|                  |        |             |             |            |            |             |
|------------------|--------|-------------|-------------|------------|------------|-------------|
| 11/17/2013 7:40  | 0.4064 | 264.3688896 | 264.3469728 | 264.342048 | 264.355664 | 264.3457664 |
| 11/17/2013 7:50  | 0.4064 | 264.3694992 | 264.3479728 | 264.343048 | 264.354664 | 264.3427664 |
| 11/17/2013 8:00  | 0.4064 | 264.3710232 | 264.3479728 | 264.340048 | 264.353664 | 264.3457664 |
| 11/17/2013 8:10  | 0.4064 | 264.3707184 | 264.3479728 | 264.345048 | 264.356664 | 264.3457664 |
| 11/17/2013 8:20  | 0.4064 | 264.3707184 | 264.3489728 | 264.344048 | 264.355664 | 264.3447664 |
| 11/17/2013 8:30  | 0.4064 | 264.3710232 | 264.3479728 | 264.348048 | 264.356664 | 264.3457664 |
| 11/17/2013 8:40  | 0.4064 | 264.3710232 | 264.3509728 | 264.347048 | 264.360664 | 264.3477664 |
| 11/17/2013 8:50  | 0.4064 | 264.3710232 | 264.3499728 | 264.347048 | 264.357664 | 264.3477664 |
| 11/17/2013 9:00  | 0.4064 | 264.3707184 | 264.3489728 | 264.347048 | 264.356664 | 264.3457664 |
| 11/17/2013 9:10  | 0.4064 | 264.3704136 | 264.3509728 | 264.347048 | 264.358664 | 264.3457664 |
| 11/17/2013 9:20  | 0.4318 | 264.3704136 | 264.3509728 | 264.344048 | 264.355664 | 264.3457664 |
| 11/17/2013 9:30  | 0.4318 | 264.3704136 | 264.3499728 | 264.345048 | 264.357664 | 264.3457664 |
| 11/17/2013 9:40  | 0.4826 | 264.3704136 | 264.3489728 | 264.345048 | 264.355664 | 264.3447664 |
| 11/17/2013 9:50  | 0.5334 | 264.3701088 | 264.3489728 | 264.347048 | 264.357664 | 264.3467664 |
| 11/17/2013 10:00 | 0.5588 | 264.3707184 | 264.3499728 | 264.347048 | 264.355664 | 264.3467664 |
| 11/17/2013 10:10 | 0.5842 | 264.3704136 | 264.3489728 | 264.345048 | 264.357664 | 264.3427664 |
| 11/17/2013 10:20 | 0.6096 | 264.3707184 | 264.3489728 | 264.346048 | 264.356664 | 264.3467664 |
| 11/17/2013 10:30 | 0.635  | 264.3722424 | 264.3579728 | 264.347048 | 264.357664 | 264.3477664 |
| 11/17/2013 10:40 | 0.635  | 264.3768144 | 264.3739728 | 264.354048 | 264.358664 | 264.3537664 |
| 11/17/2013 10:50 | 0.635  | 264.3841296 | 264.3829728 | 264.361048 | 264.358664 | 264.3567664 |
| 11/17/2013 11:00 | 0.6604 | 264.39114   | 264.3919728 | 264.368048 | 264.356664 | 264.3617664 |
| 11/17/2013 11:10 | 0.6604 | 264.3966264 | 264.3959728 | 264.378048 | 264.357664 | 264.3637664 |
| 11/17/2013 11:20 | 0.6604 | 264.4005888 | 264.3989728 | 264.383048 | 264.357664 | 264.3657664 |
| 11/17/2013 11:30 | 0.6858 | 264.403332  | 264.3979728 | 264.387048 | 264.359664 | 264.3677664 |
| 11/17/2013 11:40 | 0.6858 | 264.404856  | 264.3959728 | 264.391048 | 264.357664 | 264.3697664 |
| 11/17/2013 11:50 | 0.6858 | 264.4054656 | 264.3939728 | 264.391048 | 264.356664 | 264.3687664 |
| 11/17/2013 12:00 | 0.6858 | 264.4057704 | 264.3899728 | 264.391048 | 264.356664 | 264.3687664 |
| 11/17/2013 12:10 | 0.6858 | 264.4051608 | 264.3899728 | 264.390048 | 264.358664 | 264.3697664 |
| 11/17/2013 12:20 | 0.6858 | 264.4042464 | 264.3859728 | 264.385048 | 264.354664 | 264.3677664 |
| 11/17/2013 12:30 | 0.6858 | 264.4030272 | 264.3819728 | 264.385048 | 264.357664 | 264.3657664 |
| 11/17/2013 12:40 | 0.6858 | 264.401808  | 264.3819728 | 264.383048 | 264.357664 | 264.3677664 |
| 11/17/2013 12:50 | 0.6858 | 264.4008936 | 264.3789728 | 264.382048 | 264.359664 | 264.3687664 |
| 11/17/2013 13:00 | 0.6858 | 264.400284  | 264.3839728 | 264.383048 | 264.358664 | 264.3687664 |
| 11/17/2013 13:10 | 0.6858 | 264.4011984 | 264.3889728 | 264.382048 | 264.357664 | 264.3707664 |
| 11/17/2013 13:20 | 0.6858 | 264.4045512 | 264.3989728 | 264.383048 | 264.357664 | 264.3727664 |
| 11/17/2013 13:30 | 0.6858 | 264.4085136 | 264.4089728 | 264.390048 | 264.357664 | 264.3757664 |
| 11/17/2013 13:40 | 0.6858 | 264.412476  | 264.4169728 | 264.396048 | 264.359664 | 264.3787664 |
| 11/17/2013 13:50 | 0.6858 | 264.4164384 | 264.4219728 | 264.403048 | 264.358664 | 264.3817664 |
| 11/17/2013 14:00 | 0.6858 | 264.4204008 | 264.4229728 | 264.407048 | 264.357664 | 264.3817664 |
| 11/17/2013 14:10 | 0.6858 | 264.423144  | 264.4249728 | 264.411048 | 264.359664 | 264.3857664 |
| 11/17/2013 14:20 | 0.6858 | 264.424668  | 264.4229728 | 264.413048 | 264.357664 | 264.3867664 |
| 11/17/2013 14:30 | 0.6858 | 264.4258872 | 264.4219728 | 264.416048 | 264.359664 | 264.3877664 |
| 11/17/2013 14:40 | 0.6858 | 264.4264968 | 264.4169728 | 264.414048 | 264.357664 | 264.3867664 |
| 11/17/2013 14:50 | 0.6858 | 264.4268016 | 264.4179728 | 264.416048 | 264.359664 | 264.3897664 |
| 11/17/2013 15:00 | 0.6858 | 264.426192  | 264.4189728 | 264.413048 | 264.359664 | 264.3887664 |
| 11/17/2013 15:10 | 0.6858 | 264.4255824 | 264.4129728 | 264.414048 | 264.360664 | 264.3877664 |
| 11/17/2013 15:20 | 0.6858 | 264.4243632 | 264.4099728 | 264.411048 | 264.362664 | 264.3867664 |

|                  |        |             |             |            |            |             |
|------------------|--------|-------------|-------------|------------|------------|-------------|
| 11/17/2013 15:30 | 0.6858 | 264.423144  | 264.4099728 | 264.410048 | 264.361664 | 264.3887664 |
| 11/17/2013 15:40 | 0.6858 | 264.4219248 | 264.4079728 | 264.407048 | 264.360664 | 264.3857664 |
| 11/17/2013 15:50 | 0.6858 | 264.4210104 | 264.4049728 | 264.404048 | 264.359664 | 264.3867664 |
| 11/17/2013 16:00 | 0.6858 | 264.4204008 | 264.4049728 | 264.404048 | 264.358664 | 264.3857664 |
| 11/17/2013 16:10 | 0.6858 | 264.420096  | 264.4059728 | 264.403048 | 264.361664 | 264.3867664 |
| 11/17/2013 16:20 | 0.6858 | 264.420096  | 264.4099728 | 264.405048 | 264.360664 | 264.3877664 |
| 11/17/2013 16:30 | 0.6858 | 264.4207056 | 264.4089728 | 264.403048 | 264.358664 | 264.3867664 |
| 11/17/2013 16:40 | 0.6858 | 264.4213152 | 264.4109728 | 264.402048 | 264.359664 | 264.3877664 |
| 11/17/2013 16:50 | 0.6858 | 264.4225344 | 264.4139728 | 264.405048 | 264.359664 | 264.3897664 |
| 11/17/2013 17:00 | 0.6858 | 264.4237536 | 264.4159728 | 264.405048 | 264.359664 | 264.3897664 |
| 11/17/2013 17:10 | 0.6858 | 264.4252776 | 264.4209728 | 264.410048 | 264.364664 | 264.3947664 |
| 11/17/2013 17:20 | 0.6858 | 264.4264968 | 264.4199728 | 264.410048 | 264.362664 | 264.3917664 |
| 11/17/2013 17:30 | 0.6858 | 264.427716  | 264.4219728 | 264.413048 | 264.363664 | 264.3927664 |
| 11/17/2013 17:40 | 0.6858 | 264.4289352 | 264.4239728 | 264.414048 | 264.364664 | 264.3947664 |
| 11/17/2013 17:50 | 0.6858 | 264.4298496 | 264.4229728 | 264.415048 | 264.364664 | 264.3967664 |
| 11/17/2013 18:00 | 0.6858 | 264.4304592 | 264.4239728 | 264.416048 | 264.362664 | 264.3967664 |
| 11/17/2013 18:10 | 0.6858 | 264.4310688 | 264.4239728 | 264.418048 | 264.363664 | 264.3947664 |
| 11/17/2013 18:20 | 0.6858 | 264.4319832 | 264.4249728 | 264.417048 | 264.362664 | 264.3957664 |
| 11/17/2013 18:30 | 0.6858 | 264.432288  | 264.4249728 | 264.418048 | 264.364664 | 264.3967664 |
| 11/17/2013 18:40 | 0.6858 | 264.4328976 | 264.4229728 | 264.418048 | 264.362664 | 264.3977664 |
| 11/17/2013 18:50 | 0.6858 | 264.4332024 | 264.4249728 | 264.420048 | 264.364664 | 264.3977664 |
| 11/17/2013 19:00 | 0.6858 | 264.4335072 | 264.4229728 | 264.418048 | 264.362664 | 264.3977664 |
| 11/17/2013 19:10 | 0.6858 | 264.433812  | 264.4219728 | 264.419048 | 264.363664 | 264.3967664 |
| 11/17/2013 19:20 | 0.6858 | 264.433812  | 264.4239728 | 264.421048 | 264.364664 | 264.3987664 |
| 11/17/2013 19:30 | 0.6858 | 264.4335072 | 264.4219728 | 264.419048 | 264.363664 | 264.3987664 |
| 11/17/2013 19:40 | 0.6858 | 264.4335072 | 264.4209728 | 264.419048 | 264.364664 | 264.3967664 |
| 11/17/2013 19:50 | 0.6858 | 264.4332024 | 264.4219728 | 264.419048 | 264.366664 | 264.3977664 |
| 11/17/2013 20:00 | 0.6858 | 264.4328976 | 264.4209728 | 264.418048 | 264.364664 | 264.3977664 |
| 11/17/2013 20:10 | 0.6858 | 264.4325928 | 264.4199728 | 264.417048 | 264.364664 | 264.3967664 |
| 11/17/2013 20:20 | 0.6858 | 264.432288  | 264.4189728 | 264.415048 | 264.361664 | 264.3977664 |
| 11/17/2013 20:30 | 0.6858 | 264.4319832 | 264.4209728 | 264.413048 | 264.363664 | 264.3957664 |
| 11/17/2013 20:40 | 0.6858 | 264.4313736 | 264.4149728 | 264.413048 | 264.362664 | 264.3967664 |
| 11/17/2013 20:50 | 0.6858 | 264.4310688 | 264.4159728 | 264.413048 | 264.363664 | 264.3967664 |
| 11/17/2013 21:00 | 0.6858 | 264.4304592 | 264.4149728 | 264.413048 | 264.364664 | 264.3957664 |
| 11/17/2013 21:10 | 0.6858 | 264.4301544 | 264.4119728 | 264.412048 | 264.363664 | 264.3977664 |
| 11/17/2013 21:20 | 0.6858 | 264.4298496 | 264.4149728 | 264.412048 | 264.365664 | 264.3957664 |
| 11/17/2013 21:30 | 0.6858 | 264.42924   | 264.4139728 | 264.410048 | 264.367664 | 264.3977664 |
| 11/17/2013 21:40 | 0.6858 | 264.4289352 | 264.4129728 | 264.412048 | 264.366664 | 264.3987664 |
| 11/17/2013 21:50 | 0.6858 | 264.4283256 | 264.4109728 | 264.407048 | 264.366664 | 264.3957664 |
| 11/17/2013 22:00 | 0.6858 | 264.427716  | 264.4089728 | 264.409048 | 264.367664 | 264.3957664 |
| 11/17/2013 22:10 | 0.6858 | 264.4274112 | 264.4119728 | 264.407048 | 264.366664 | 264.3947664 |
| 11/17/2013 22:20 | 0.6858 | 264.4268016 | 264.4109728 | 264.406048 | 264.367664 | 264.3937664 |
| 11/17/2013 22:30 | 0.6858 | 264.4264968 | 264.4079728 | 264.408048 | 264.366664 | 264.3937664 |
| 11/17/2013 22:40 | 0.6858 | 264.4258872 | 264.4059728 | 264.405048 | 264.365664 | 264.3927664 |
| 11/17/2013 22:50 | 0.6858 | 264.4255824 | 264.4059728 | 264.404048 | 264.363664 | 264.3917664 |
| 11/17/2013 23:00 | 0.6858 | 264.4252776 | 264.4059728 | 264.404048 | 264.367664 | 264.3937664 |
| 11/17/2013 23:10 | 0.6858 | 264.4249728 | 264.4039728 | 264.403048 | 264.366664 | 264.3917664 |

|                  |        |             |             |            |            |             |
|------------------|--------|-------------|-------------|------------|------------|-------------|
| 11/17/2013 23:20 | 0.6858 | 264.424668  | 264.4049728 | 264.403048 | 264.366664 | 264.3937664 |
| 11/17/2013 23:30 | 0.6858 | 264.424668  | 264.4059728 | 264.404048 | 264.366664 | 264.3927664 |
| 11/17/2013 23:40 | 0.6858 | 264.4243632 | 264.4049728 | 264.403048 | 264.365664 | 264.3927664 |
| 11/17/2013 23:50 | 0.6858 | 264.4240584 | 264.4049728 | 264.403048 | 264.368664 | 264.3947664 |
| 11/18/2013 0:00  | 0      | 264.4237536 | 264.4049728 | 264.403048 | 264.365664 | 264.3927664 |
| 11/18/2013 0:10  | 0      | 264.4234488 | 264.4039728 | 264.402048 | 264.366664 | 264.3937664 |
| 11/18/2013 0:20  | 0      | 264.4234488 | 264.4039728 | 264.402048 | 264.366664 | 264.3927664 |
| 11/18/2013 0:30  | 0      | 264.423144  | 264.4049728 | 264.401048 | 264.370664 | 264.3927664 |
| 11/18/2013 0:40  | 0      | 264.4234488 | 264.4059728 | 264.401048 | 264.370664 | 264.3937664 |
| 11/18/2013 0:50  | 0      | 264.423144  | 264.4079728 | 264.401048 | 264.369664 | 264.3947664 |
| 11/18/2013 1:00  | 0      | 264.423144  | 264.4069728 | 264.402048 | 264.367664 | 264.3947664 |
| 11/18/2013 1:10  | 0      | 264.423144  | 264.4059728 | 264.404048 | 264.369664 | 264.3967664 |
| 11/18/2013 1:20  | 0      | 264.4228392 | 264.4049728 | 264.402048 | 264.364664 | 264.3947664 |
| 11/18/2013 1:30  | 0      | 264.4228392 | 264.4069728 | 264.402048 | 264.369664 | 264.3947664 |
| 11/18/2013 1:40  | 0      | 264.4225344 | 264.4039728 | 264.402048 | 264.367664 | 264.3937664 |
| 11/18/2013 1:50  | 0      | 264.4222296 | 264.4019728 | 264.398048 | 264.367664 | 264.3927664 |
| 11/18/2013 2:00  | 0      | 264.4219248 | 264.4019728 | 264.398048 | 264.365664 | 264.3907664 |
| 11/18/2013 2:10  | 0      | 264.42162   | 264.4019728 | 264.399048 | 264.367664 | 264.3917664 |
| 11/18/2013 2:20  | 0      | 264.42162   | 264.4019728 | 264.399048 | 264.367664 | 264.3917664 |
| 11/18/2013 2:30  | 0      | 264.4210104 | 264.4019728 | 264.399048 | 264.368664 | 264.3957664 |
| 11/18/2013 2:40  | 0      | 264.4207056 | 264.4009728 | 264.398048 | 264.367664 | 264.3907664 |
| 11/18/2013 2:50  | 0      | 264.4204008 | 264.4029728 | 264.399048 | 264.368664 | 264.3927664 |
| 11/18/2013 3:00  | 0      | 264.420096  | 264.4019728 | 264.398048 | 264.368664 | 264.3917664 |
| 11/18/2013 3:10  | 0      | 264.420096  | 264.4019728 | 264.398048 | 264.367664 | 264.3917664 |
| 11/18/2013 3:20  | 0      | 264.4197912 | 264.4019728 | 264.398048 | 264.369664 | 264.3917664 |
| 11/18/2013 3:30  | 0      | 264.4194864 | 264.3989728 | 264.397048 | 264.366664 | 264.3907664 |
| 11/18/2013 3:40  | 0      | 264.4194864 | 264.4009728 | 264.397048 | 264.366664 | 264.3927664 |
| 11/18/2013 3:50  | 0      | 264.4188768 | 264.3999728 | 264.399048 | 264.367664 | 264.3917664 |
| 11/18/2013 4:00  | 0      | 264.4191816 | 264.3979728 | 264.396048 | 264.364664 | 264.3887664 |
| 11/18/2013 4:10  | 0      | 264.4188768 | 264.3999728 | 264.396048 | 264.369664 | 264.3917664 |
| 11/18/2013 4:20  | 0      | 264.418572  | 264.3969728 | 264.395048 | 264.366664 | 264.3907664 |
| 11/18/2013 4:30  | 0      | 264.4179624 | 264.3969728 | 264.395048 | 264.366664 | 264.3887664 |
| 11/18/2013 4:40  | 0      | 264.4179624 | 264.3959728 | 264.396048 | 264.368664 | 264.3897664 |
| 11/18/2013 4:50  | 0      | 264.4176576 | 264.3989728 | 264.396048 | 264.368664 | 264.3907664 |
| 11/18/2013 5:00  | 0      | 264.4173528 | 264.3959728 | 264.393048 | 264.367664 | 264.3897664 |
| 11/18/2013 5:10  | 0      | 264.417048  | 264.3969728 | 264.395048 | 264.367664 | 264.3907664 |
| 11/18/2013 5:20  | 0      | 264.4167432 | 264.3969728 | 264.393048 | 264.367664 | 264.3897664 |
| 11/18/2013 5:30  | 0      | 264.4164384 | 264.3959728 | 264.393048 | 264.365664 | 264.3887664 |
| 11/18/2013 5:40  | 0      | 264.4158288 | 264.3949728 | 264.391048 | 264.366664 | 264.3887664 |
| 11/18/2013 5:50  | 0      | 264.4158288 | 264.3949728 | 264.393048 | 264.366664 | 264.3907664 |
| 11/18/2013 6:00  | 0      | 264.4152192 | 264.3919728 | 264.389048 | 264.367664 | 264.3857664 |
| 11/18/2013 6:10  | 0      | 264.4152192 | 264.3919728 | 264.391048 | 264.367664 | 264.3867664 |
| 11/18/2013 6:20  | 0      | 264.4146096 | 264.3939728 | 264.391048 | 264.369664 | 264.3897664 |
| 11/18/2013 6:30  | 0      | 264.4143048 | 264.3939728 | 264.390048 | 264.367664 | 264.3867664 |
| 11/18/2013 6:40  | 0      | 264.4136952 | 264.3909728 | 264.390048 | 264.366664 | 264.3867664 |
| 11/18/2013 6:50  | 0      | 264.4133904 | 264.3909728 | 264.390048 | 264.368664 | 264.3857664 |
| 11/18/2013 7:00  | 0      | 264.4130856 | 264.3899728 | 264.390048 | 264.369664 | 264.3877664 |

|                  |   |             |             |            |            |             |
|------------------|---|-------------|-------------|------------|------------|-------------|
| 11/18/2013 7:10  | 0 | 264.4127808 | 264.3899728 | 264.389048 | 264.367664 | 264.3857664 |
| 11/18/2013 7:20  | 0 | 264.412476  | 264.3919728 | 264.389048 | 264.369664 | 264.3857664 |
| 11/18/2013 7:30  | 0 | 264.4121712 | 264.3919728 | 264.388048 | 264.367664 | 264.3867664 |
| 11/18/2013 7:40  | 0 | 264.4118664 | 264.3889728 | 264.388048 | 264.368664 | 264.3867664 |
| 11/18/2013 7:50  | 0 | 264.4115616 | 264.3909728 | 264.389048 | 264.369664 | 264.3877664 |
| 11/18/2013 8:00  | 0 | 264.410952  | 264.3899728 | 264.387048 | 264.368664 | 264.3867664 |
| 11/18/2013 8:10  | 0 | 264.410952  | 264.3869728 | 264.387048 | 264.367664 | 264.3857664 |
| 11/18/2013 8:20  | 0 | 264.4106472 | 264.3889728 | 264.387048 | 264.367664 | 264.3837664 |
| 11/18/2013 8:30  | 0 | 264.4103424 | 264.3879728 | 264.388048 | 264.366664 | 264.3847664 |
| 11/18/2013 8:40  | 0 | 264.4100376 | 264.3879728 | 264.386048 | 264.367664 | 264.3827664 |
| 11/18/2013 8:50  | 0 | 264.4097328 | 264.3869728 | 264.386048 | 264.369664 | 264.3817664 |
| 11/18/2013 9:00  | 0 | 264.409428  | 264.3889728 | 264.386048 | 264.368664 | 264.3827664 |
| 11/18/2013 9:10  | 0 | 264.4091232 | 264.3859728 | 264.386048 | 264.367664 | 264.3807664 |
| 11/18/2013 9:20  | 0 | 264.4085136 | 264.3859728 | 264.383048 | 264.369664 | 264.3817664 |
| 11/18/2013 9:30  | 0 | 264.4082088 | 264.3869728 | 264.385048 | 264.368664 | 264.3817664 |
| 11/18/2013 9:40  | 0 | 264.4075992 | 264.3849728 | 264.383048 | 264.367664 | 264.3807664 |
| 11/18/2013 9:50  | 0 | 264.4072944 | 264.3839728 | 264.383048 | 264.367664 | 264.3797664 |
| 11/18/2013 10:00 | 0 | 264.4072944 | 264.3859728 | 264.383048 | 264.367664 | 264.3797664 |
| 11/18/2013 10:10 | 0 | 264.4066848 | 264.3849728 | 264.380048 | 264.368664 | 264.3787664 |
| 11/18/2013 10:20 | 0 | 264.4060752 | 264.3849728 | 264.382048 | 264.368664 | 264.3807664 |
| 11/18/2013 10:30 | 0 | 264.4069896 | 264.3979728 | 264.384048 | 264.369664 | 264.3837664 |
| 11/18/2013 10:40 | 0 | 264.4103424 | 264.4019728 | 264.388048 | 264.368664 | 264.3847664 |
| 11/18/2013 10:50 | 0 | 264.4130856 | 264.4039728 | 264.389048 | 264.366664 | 264.3847664 |
| 11/18/2013 11:00 | 0 | 264.4146096 | 264.4049728 | 264.395048 | 264.370664 | 264.3867664 |
| 11/18/2013 11:10 | 0 | 264.4158288 | 264.4039728 | 264.396048 | 264.369664 | 264.3877664 |
| 11/18/2013 11:20 | 0 | 264.4164384 | 264.4029728 | 264.397048 | 264.369664 | 264.3887664 |
| 11/18/2013 11:30 | 0 | 264.4164384 | 264.4029728 | 264.397048 | 264.369664 | 264.3877664 |
| 11/18/2013 11:40 | 0 | 264.4164384 | 264.4029728 | 264.399048 | 264.369664 | 264.3897664 |
| 11/18/2013 11:50 | 0 | 264.4164384 | 264.4039728 | 264.400048 | 264.370664 | 264.3887664 |
| 11/18/2013 12:00 | 0 | 264.4164384 | 264.4009728 | 264.400048 | 264.369664 | 264.3897664 |
| 11/18/2013 12:10 | 0 | 264.4164384 | 264.3999728 | 264.400048 | 264.369664 | 264.3897664 |
| 11/18/2013 12:20 | 0 | 264.4161336 | 264.4029728 | 264.401048 | 264.372664 | 264.3917664 |
| 11/18/2013 12:30 | 0 | 264.4161336 | 264.4009728 | 264.399048 | 264.369664 | 264.3887664 |
| 11/18/2013 12:40 | 0 | 264.4158288 | 264.3989728 | 264.399048 | 264.370664 | 264.3887664 |
| 11/18/2013 12:50 | 0 | 264.415524  | 264.3979728 | 264.397048 | 264.370664 | 264.3877664 |
| 11/18/2013 13:00 | 0 | 264.415524  | 264.4009728 | 264.399048 | 264.372664 | 264.3907664 |
| 11/18/2013 13:10 | 0 | 264.4152192 | 264.4009728 | 264.397048 | 264.372664 | 264.3887664 |
| 11/18/2013 13:20 | 0 | 264.4152192 | 264.3989728 | 264.397048 | 264.370664 | 264.3887664 |
| 11/18/2013 13:30 | 0 | 264.4149144 | 264.3979728 | 264.396048 | 264.370664 | 264.3877664 |
| 11/18/2013 13:40 | 0 | 264.4146096 | 264.3979728 | 264.396048 | 264.370664 | 264.3887664 |
| 11/18/2013 13:50 | 0 | 264.4143048 | 264.3999728 | 264.397048 | 264.369664 | 264.3887664 |
| 11/18/2013 14:00 | 0 | 264.4143048 | 264.3989728 | 264.396048 | 264.371664 | 264.3907664 |
| 11/18/2013 14:10 | 0 | 264.414     | 264.3979728 | 264.397048 | 264.370664 | 264.3877664 |
| 11/18/2013 14:20 | 0 | 264.4136952 | 264.3979728 | 264.396048 | 264.370664 | 264.3887664 |
| 11/18/2013 14:30 | 0 | 264.4136952 | 264.4009728 | 264.399048 | 264.373664 | 264.3917664 |
| 11/18/2013 14:40 | 0 | 264.4133904 | 264.4009728 | 264.397048 | 264.372664 | 264.3917664 |
| 11/18/2013 14:50 | 0 | 264.4136952 | 264.3959728 | 264.396048 | 264.370664 | 264.3887664 |

|                  |   |             |             |            |            |             |
|------------------|---|-------------|-------------|------------|------------|-------------|
| 11/18/2013 15:00 | 0 | 264.4133904 | 264.3979728 | 264.396048 | 264.369664 | 264.3887664 |
| 11/18/2013 15:10 | 0 | 264.4133904 | 264.3979728 | 264.395048 | 264.370664 | 264.3887664 |
| 11/18/2013 15:20 | 0 | 264.4130856 | 264.3959728 | 264.395048 | 264.370664 | 264.3887664 |
| 11/18/2013 15:30 | 0 | 264.4130856 | 264.3949728 | 264.396048 | 264.370664 | 264.3887664 |
| 11/18/2013 15:40 | 0 | 264.4121712 | 264.3929728 | 264.393048 | 264.369664 | 264.3877664 |
| 11/18/2013 15:50 | 0 | 264.4115616 | 264.3929728 | 264.393048 | 264.371664 | 264.3887664 |
| 11/18/2013 16:00 | 0 | 264.4112568 | 264.3919728 | 264.393048 | 264.369664 | 264.3877664 |
| 11/18/2013 16:10 | 0 | 264.4106472 | 264.3919728 | 264.393048 | 264.369664 | 264.3877664 |
| 11/18/2013 16:20 | 0 | 264.4103424 | 264.3919728 | 264.392048 | 264.369664 | 264.3877664 |
| 11/18/2013 16:30 | 0 | 264.4100376 | 264.3919728 | 264.392048 | 264.369664 | 264.3887664 |
| 11/18/2013 16:40 | 0 | 264.4097328 | 264.3919728 | 264.391048 | 264.371664 | 264.3877664 |
| 11/18/2013 16:50 | 0 | 264.4097328 | 264.3919728 | 264.389048 | 264.370664 | 264.3867664 |
| 11/18/2013 17:00 | 0 | 264.409428  | 264.3919728 | 264.389048 | 264.369664 | 264.3857664 |
| 11/18/2013 17:10 | 0 | 264.409428  | 264.3919728 | 264.389048 | 264.370664 | 264.3867664 |
| 11/18/2013 17:20 | 0 | 264.409428  | 264.3919728 | 264.391048 | 264.373664 | 264.3857664 |
| 11/18/2013 17:30 | 0 | 264.409428  | 264.3919728 | 264.389048 | 264.371664 | 264.3867664 |
| 11/18/2013 17:40 | 0 | 264.409428  | 264.3919728 | 264.389048 | 264.371664 | 264.3867664 |
| 11/18/2013 17:50 | 0 | 264.4091232 | 264.3909728 | 264.389048 | 264.372664 | 264.3847664 |
| 11/18/2013 18:00 | 0 | 264.409428  | 264.3909728 | 264.389048 | 264.372664 | 264.3847664 |
| 11/18/2013 18:10 | 0 | 264.4088184 | 264.3919728 | 264.390048 | 264.373664 | 264.3867664 |
| 11/18/2013 18:20 | 0 | 264.4088184 | 264.3919728 | 264.390048 | 264.373664 | 264.3867664 |
| 11/18/2013 18:30 | 0 | 264.4088184 | 264.3909728 | 264.388048 | 264.370664 | 264.3837664 |
| 11/18/2013 18:40 | 0 | 264.4088184 | 264.3919728 | 264.389048 | 264.372664 | 264.3867664 |
| 11/18/2013 18:50 | 0 | 264.4085136 | 264.3909728 | 264.389048 | 264.370664 | 264.3857664 |
| 11/18/2013 19:00 | 0 | 264.4085136 | 264.3899728 | 264.388048 | 264.371664 | 264.3857664 |
| 11/18/2013 19:10 | 0 | 264.4085136 | 264.3909728 | 264.388048 | 264.374664 | 264.3857664 |
| 11/18/2013 19:20 | 0 | 264.4085136 | 264.3899728 | 264.389048 | 264.371664 | 264.3837664 |
| 11/18/2013 19:30 | 0 | 264.4082088 | 264.3909728 | 264.390048 | 264.374664 | 264.3857664 |
| 11/18/2013 19:40 | 0 | 264.407904  | 264.3899728 | 264.387048 | 264.373664 | 264.3837664 |
| 11/18/2013 19:50 | 0 | 264.407904  | 264.3909728 | 264.388048 | 264.372664 | 264.3857664 |
| 11/18/2013 20:00 | 0 | 264.407904  | 264.3909728 | 264.386048 | 264.374664 | 264.3837664 |
| 11/18/2013 20:10 | 0 | 264.4075992 | 264.3889728 | 264.386048 | 264.373664 | 264.3837664 |
| 11/18/2013 20:20 | 0 | 264.4072944 | 264.3889728 | 264.385048 | 264.373664 | 264.3837664 |
| 11/18/2013 20:30 | 0 | 264.4072944 | 264.3899728 | 264.387048 | 264.373664 | 264.3837664 |
| 11/18/2013 20:40 | 0 | 264.4069896 | 264.3899728 | 264.386048 | 264.373664 | 264.3837664 |
| 11/18/2013 20:50 | 0 | 264.4069896 | 264.3909728 | 264.387048 | 264.374664 | 264.3857664 |
| 11/18/2013 21:00 | 0 | 264.4066848 | 264.3889728 | 264.385048 | 264.372664 | 264.3827664 |
| 11/18/2013 21:10 | 0 | 264.40638   | 264.3879728 | 264.387048 | 264.377664 | 264.3857664 |
| 11/18/2013 21:20 | 0 | 264.404856  | 264.3809728 | 264.383048 | 264.372664 | 264.3797664 |
| 11/18/2013 21:30 | 0 | 264.403332  | 264.3769728 | 264.379048 | 264.371664 | 264.3767664 |
| 11/18/2013 21:40 | 0 | 264.401808  | 264.3769728 | 264.378048 | 264.371664 | 264.3787664 |
| 11/18/2013 21:50 | 0 | 264.4005888 | 264.3769728 | 264.377048 | 264.372664 | 264.3777664 |
| 11/18/2013 22:00 | 0 | 264.3999792 | 264.3789728 | 264.375048 | 264.374664 | 264.3767664 |
| 11/18/2013 22:10 | 0 | 264.3993696 | 264.3779728 | 264.374048 | 264.373664 | 264.3767664 |
| 11/18/2013 22:20 | 0 | 264.39876   | 264.3769728 | 264.375048 | 264.372664 | 264.3787664 |
| 11/18/2013 22:30 | 0 | 264.3984552 | 264.3759728 | 264.373048 | 264.371664 | 264.3767664 |
| 11/18/2013 22:40 | 0 | 264.3981504 | 264.3749728 | 264.371048 | 264.371664 | 264.3757664 |

|                  |   |             |             |            |            |             |
|------------------|---|-------------|-------------|------------|------------|-------------|
| 11/18/2013 22:50 | 0 | 264.3978456 | 264.3759728 | 264.374048 | 264.375664 | 264.3757664 |
| 11/18/2013 23:00 | 0 | 264.3978456 | 264.3749728 | 264.371048 | 264.371664 | 264.3757664 |
| 11/18/2013 23:10 | 0 | 264.3975408 | 264.3749728 | 264.371048 | 264.373664 | 264.3757664 |
| 11/18/2013 23:20 | 0 | 264.397236  | 264.3729728 | 264.370048 | 264.368664 | 264.3727664 |
| 11/18/2013 23:30 | 0 | 264.3969312 | 264.3749728 | 264.371048 | 264.371664 | 264.3757664 |
| 11/18/2013 23:40 | 0 | 264.3966264 | 264.3719728 | 264.370048 | 264.372664 | 264.3737664 |
| 11/18/2013 23:50 | 0 | 264.3966264 | 264.3729728 | 264.371048 | 264.373664 | 264.3757664 |
| 11/19/2013 0:00  | 0 | 264.3960168 | 264.3749728 | 264.368048 | 264.370664 | 264.3727664 |
| 11/19/2013 0:10  | 0 | 264.395712  | 264.3719728 | 264.368048 | 264.370664 | 264.3727664 |
| 11/19/2013 0:20  | 0 | 264.3951024 | 264.3729728 | 264.370048 | 264.372664 | 264.3707664 |
| 11/19/2013 0:30  | 0 | 264.3947976 | 264.3699728 | 264.368048 | 264.371664 | 264.3707664 |
| 11/19/2013 0:40  | 0 | 264.394188  | 264.3719728 | 264.368048 | 264.372664 | 264.3707664 |
| 11/19/2013 0:50  | 0 | 264.3938832 | 264.3719728 | 264.367048 | 264.372664 | 264.3707664 |
| 11/19/2013 1:00  | 0 | 264.3935784 | 264.3709728 | 264.368048 | 264.371664 | 264.3707664 |
| 11/19/2013 1:10  | 0 | 264.3929688 | 264.3679728 | 264.370048 | 264.372664 | 264.3707664 |
| 11/19/2013 1:20  | 0 | 264.3929688 | 264.3699728 | 264.366048 | 264.370664 | 264.3687664 |
| 11/19/2013 1:30  | 0 | 264.392664  | 264.3699728 | 264.367048 | 264.370664 | 264.3707664 |
| 11/19/2013 1:40  | 0 | 264.3923592 | 264.3679728 | 264.366048 | 264.369664 | 264.3687664 |
| 11/19/2013 1:50  | 0 | 264.3920544 | 264.3679728 | 264.366048 | 264.369664 | 264.3677664 |
| 11/19/2013 2:00  | 0 | 264.3923592 | 264.3699728 | 264.366048 | 264.370664 | 264.3667664 |
| 11/19/2013 2:10  | 0 | 264.3920544 | 264.3709728 | 264.366048 | 264.371664 | 264.3687664 |
| 11/19/2013 2:20  | 0 | 264.3920544 | 264.3689728 | 264.366048 | 264.371664 | 264.3677664 |
| 11/19/2013 2:30  | 0 | 264.3917496 | 264.3679728 | 264.367048 | 264.368664 | 264.3667664 |
| 11/19/2013 2:40  | 0 | 264.3917496 | 264.3679728 | 264.366048 | 264.368664 | 264.3687664 |
| 11/19/2013 2:50  | 0 | 264.3917496 | 264.3709728 | 264.368048 | 264.369664 | 264.3677664 |
| 11/19/2013 3:00  | 0 | 264.3914448 | 264.3689728 | 264.366048 | 264.368664 | 264.3667664 |
| 11/19/2013 3:10  | 0 | 264.3914448 | 264.3689728 | 264.366048 | 264.368664 | 264.3687664 |
| 11/19/2013 3:20  | 0 | 264.3914448 | 264.3689728 | 264.367048 | 264.371664 | 264.3687664 |
| 11/19/2013 3:30  | 0 | 264.3914448 | 264.3679728 | 264.364048 | 264.368664 | 264.3647664 |
| 11/19/2013 3:40  | 0 | 264.39114   | 264.3709728 | 264.366048 | 264.373664 | 264.3667664 |
| 11/19/2013 3:50  | 0 | 264.39114   | 264.3689728 | 264.366048 | 264.369664 | 264.3647664 |
| 11/19/2013 4:00  | 0 | 264.39114   | 264.3699728 | 264.367048 | 264.372664 | 264.3677664 |
| 11/19/2013 4:10  | 0 | 264.3908352 | 264.3689728 | 264.364048 | 264.369664 | 264.3667664 |
| 11/19/2013 4:20  | 0 | 264.3905304 | 264.3689728 | 264.364048 | 264.371664 | 264.3667664 |
| 11/19/2013 4:30  | 0 | 264.3908352 | 264.3699728 | 264.364048 | 264.369664 | 264.3657664 |
| 11/19/2013 4:40  | 0 | 264.3905304 | 264.3699728 | 264.364048 | 264.370664 | 264.3677664 |
| 11/19/2013 4:50  | 0 | 264.3905304 | 264.3689728 | 264.363048 | 264.370664 | 264.3657664 |
| 11/19/2013 5:00  | 0 | 264.3902256 | 264.3689728 | 264.366048 | 264.369664 | 264.3657664 |
| 11/19/2013 5:10  | 0 | 264.3902256 | 264.3689728 | 264.367048 | 264.372664 | 264.3657664 |
| 11/19/2013 5:20  | 0 | 264.3902256 | 264.3689728 | 264.366048 | 264.367664 | 264.3647664 |
| 11/19/2013 5:30  | 0 | 264.3902256 | 264.3699728 | 264.366048 | 264.372664 | 264.3657664 |
| 11/19/2013 5:40  | 0 | 264.389616  | 264.3669728 | 264.364048 | 264.372664 | 264.3677664 |
| 11/19/2013 5:50  | 0 | 264.389616  | 264.3689728 | 264.363048 | 264.371664 | 264.3647664 |
| 11/19/2013 6:00  | 0 | 264.3893112 | 264.3679728 | 264.366048 | 264.372664 | 264.3677664 |
| 11/19/2013 6:10  | 0 | 264.3890064 | 264.3669728 | 264.366048 | 264.370664 | 264.3637664 |
| 11/19/2013 6:20  | 0 | 264.3887016 | 264.3649728 | 264.363048 | 264.369664 | 264.3627664 |
| 11/19/2013 6:30  | 0 | 264.3883968 | 264.3669728 | 264.364048 | 264.370664 | 264.3657664 |

|                  |   |             |             |            |            |             |
|------------------|---|-------------|-------------|------------|------------|-------------|
| 11/19/2013 6:40  | 0 | 264.388092  | 264.3669728 | 264.363048 | 264.370664 | 264.3617664 |
| 11/19/2013 6:50  | 0 | 264.3877872 | 264.3659728 | 264.364048 | 264.372664 | 264.3637664 |
| 11/19/2013 7:00  | 0 | 264.3874824 | 264.3649728 | 264.362048 | 264.368664 | 264.3617664 |
| 11/19/2013 7:10  | 0 | 264.3874824 | 264.3649728 | 264.362048 | 264.370664 | 264.3637664 |
| 11/19/2013 7:20  | 0 | 264.3874824 | 264.3659728 | 264.364048 | 264.370664 | 264.3647664 |
| 11/19/2013 7:30  | 0 | 264.3871776 | 264.3649728 | 264.363048 | 264.368664 | 264.3637664 |
| 11/19/2013 7:40  | 0 | 264.3871776 | 264.3649728 | 264.363048 | 264.370664 | 264.3647664 |
| 11/19/2013 7:50  | 0 | 264.3868728 | 264.3639728 | 264.365048 | 264.371664 | 264.3627664 |
| 11/19/2013 8:00  | 0 | 264.3868728 | 264.3659728 | 264.362048 | 264.369664 | 264.3647664 |
| 11/19/2013 8:10  | 0 | 264.3868728 | 264.3659728 | 264.363048 | 264.371664 | 264.3647664 |
| 11/19/2013 8:20  | 0 | 264.386568  | 264.3669728 | 264.363048 | 264.371664 | 264.3627664 |
| 11/19/2013 8:30  | 0 | 264.3862632 | 264.3659728 | 264.363048 | 264.371664 | 264.3647664 |
| 11/19/2013 8:40  | 0 | 264.3862632 | 264.3649728 | 264.363048 | 264.370664 | 264.3627664 |
| 11/19/2013 8:50  | 0 | 264.3862632 | 264.3619728 | 264.361048 | 264.371664 | 264.3627664 |
| 11/19/2013 9:00  | 0 | 264.3859584 | 264.3639728 | 264.362048 | 264.371664 | 264.3627664 |
| 11/19/2013 9:10  | 0 | 264.3859584 | 264.3649728 | 264.362048 | 264.372664 | 264.3637664 |
| 11/19/2013 9:20  | 0 | 264.3856536 | 264.3649728 | 264.364048 | 264.369664 | 264.3627664 |
| 11/19/2013 9:30  | 0 | 264.3856536 | 264.3649728 | 264.363048 | 264.370664 | 264.3607664 |
| 11/19/2013 9:40  | 0 | 264.3856536 | 264.3649728 | 264.362048 | 264.367664 | 264.3627664 |
| 11/19/2013 9:50  | 0 | 264.3856536 | 264.3719728 | 264.362048 | 264.369664 | 264.3627664 |
| 11/19/2013 10:00 | 0 | 264.3874824 | 264.3699728 | 264.366048 | 264.370664 | 264.3637664 |
| 11/19/2013 10:10 | 0 | 264.3874824 | 264.3719728 | 264.365048 | 264.370664 | 264.3637664 |
| 11/19/2013 10:20 | 0 | 264.3877872 | 264.3749728 | 264.368048 | 264.368664 | 264.3667664 |
| 11/19/2013 10:30 | 0 | 264.3883968 | 264.3729728 | 264.367048 | 264.368664 | 264.3647664 |
| 11/19/2013 10:40 | 0 | 264.3883968 | 264.3729728 | 264.369048 | 264.369664 | 264.3667664 |
| 11/19/2013 10:50 | 0 | 264.3883968 | 264.3729728 | 264.366048 | 264.369664 | 264.3667664 |
| 11/19/2013 11:00 | 0 | 264.3883968 | 264.3729728 | 264.366048 | 264.369664 | 264.3667664 |
| 11/19/2013 11:10 | 0 | 264.3887016 | 264.3739728 | 264.369048 | 264.368664 | 264.3657664 |
| 11/19/2013 11:20 | 0 | 264.3883968 | 264.3709728 | 264.367048 | 264.367664 | 264.3627664 |
| 11/19/2013 11:30 | 0 | 264.388092  | 264.3719728 | 264.369048 | 264.370664 | 264.3657664 |
| 11/19/2013 11:40 | 0 | 264.388092  | 264.3719728 | 264.370048 | 264.371664 | 264.3647664 |
| 11/19/2013 11:50 | 0 | 264.388092  | 264.3749728 | 264.370048 | 264.369664 | 264.3667664 |
| 11/19/2013 12:00 | 0 | 264.3877872 | 264.3729728 | 264.369048 | 264.369664 | 264.3657664 |
| 11/19/2013 12:10 | 0 | 264.3877872 | 264.3709728 | 264.369048 | 264.368664 | 264.3657664 |
| 11/19/2013 12:20 | 0 | 264.3874824 | 264.3719728 | 264.370048 | 264.369664 | 264.3667664 |
| 11/19/2013 12:30 | 0 | 264.3871776 | 264.3719728 | 264.368048 | 264.369664 | 264.3667664 |
| 11/19/2013 12:40 | 0 | 264.3868728 | 264.3699728 | 264.367048 | 264.370664 | 264.3657664 |
| 11/19/2013 12:50 | 0 | 264.386568  | 264.3679728 | 264.364048 | 264.366664 | 264.3647664 |
| 11/19/2013 13:00 | 0 | 264.3862632 | 264.3679728 | 264.365048 | 264.368664 | 264.3627664 |
| 11/19/2013 13:10 | 0 | 264.3862632 | 264.3699728 | 264.367048 | 264.370664 | 264.3647664 |
| 11/19/2013 13:20 | 0 | 264.3856536 | 264.3679728 | 264.365048 | 264.368664 | 264.3637664 |
| 11/19/2013 13:30 | 0 | 264.3853488 | 264.3679728 | 264.366048 | 264.367664 | 264.3657664 |
| 11/19/2013 13:40 | 0 | 264.3847392 | 264.3659728 | 264.364048 | 264.369664 | 264.3637664 |
| 11/19/2013 13:50 | 0 | 264.3841296 | 264.3679728 | 264.363048 | 264.368664 | 264.3627664 |
| 11/19/2013 14:00 | 0 | 264.3838248 | 264.3669728 | 264.364048 | 264.367664 | 264.3637664 |
| 11/19/2013 14:10 | 0 | 264.3823008 | 264.3679728 | 264.364048 | 264.369664 | 264.3637664 |
| 11/19/2013 14:20 | 0 | 264.38352   | 264.3649728 | 264.362048 | 264.368664 | 264.3617664 |



|                  |   |             |             |            |            |             |
|------------------|---|-------------|-------------|------------|------------|-------------|
| 11/19/2013 14:30 | 0 | 264.3829104 | 264.3629728 | 264.361048 | 264.368664 | 264.3627664 |
| 11/19/2013 14:40 | 0 | 264.3826056 | 264.3609728 | 264.362048 | 264.369664 | 264.3617664 |
| 11/19/2013 14:50 | 0 | 264.3816912 | 264.3619728 | 264.362048 | 264.368664 | 264.3587664 |
| 11/19/2013 15:00 | 0 | 264.3813864 | 264.3589728 | 264.360048 | 264.370664 | 264.3617664 |
| 11/19/2013 15:10 | 0 | 264.3813864 | 264.3569728 | 264.358048 | 264.366664 | 264.3577664 |
| 11/19/2013 15:20 | 0 | 264.3807768 | 264.3599728 | 264.357048 | 264.369664 | 264.3607664 |
| 11/19/2013 15:30 | 0 | 264.380472  | 264.3579728 | 264.354048 | 264.366664 | 264.3577664 |
| 11/19/2013 15:40 | 0 | 264.3801672 | 264.3619728 | 264.360048 | 264.371664 | 264.3597664 |
| 11/19/2013 15:50 | 0 | 264.3798624 | 264.3579728 | 264.356048 | 264.368664 | 264.3557664 |
| 11/19/2013 16:00 | 0 | 264.3795576 | 264.3599728 | 264.359048 | 264.369664 | 264.3597664 |
| 11/19/2013 16:10 | 0 | 264.3795576 | 264.3589728 | 264.356048 | 264.369664 | 264.3567664 |
| 11/19/2013 16:20 | 0 | 264.3792528 | 264.3619728 | 264.357048 | 264.369664 | 264.3597664 |
| 11/19/2013 16:30 | 0 | 264.378948  | 264.3589728 | 264.355048 | 264.367664 | 264.3567664 |
| 11/19/2013 16:40 | 0 | 264.3792528 | 264.3589728 | 264.356048 | 264.367664 | 264.3577664 |
| 11/19/2013 16:50 | 0 | 264.378948  | 264.3579728 | 264.356048 | 264.368664 | 264.3577664 |
| 11/19/2013 17:00 | 0 | 264.3786432 | 264.3599728 | 264.356048 | 264.370664 | 264.3587664 |
| 11/19/2013 17:10 | 0 | 264.3786432 | 264.3599728 | 264.358048 | 264.371664 | 264.3587664 |
| 11/19/2013 17:20 | 0 | 264.3786432 | 264.3579728 | 264.356048 | 264.370664 | 264.3567664 |
| 11/19/2013 17:30 | 0 | 264.3783384 | 264.3579728 | 264.355048 | 264.368664 | 264.3557664 |
| 11/19/2013 17:40 | 0 | 264.3783384 | 264.3579728 | 264.355048 | 264.368664 | 264.3557664 |
| 11/19/2013 17:50 | 0 | 264.3783384 | 264.3579728 | 264.355048 | 264.367664 | 264.3567664 |
| 11/19/2013 18:00 | 0 | 264.3780336 | 264.3579728 | 264.353048 | 264.368664 | 264.3567664 |
| 11/19/2013 18:10 | 0 | 264.3777288 | 264.3579728 | 264.353048 | 264.370664 | 264.3587664 |
| 11/19/2013 18:20 | 0 | 264.3777288 | 264.3579728 | 264.353048 | 264.370664 | 264.3577664 |
| 11/19/2013 18:30 | 0 | 264.377424  | 264.3579728 | 264.356048 | 264.370664 | 264.3577664 |
| 11/19/2013 18:40 | 0 | 264.377424  | 264.3579728 | 264.353048 | 264.370664 | 264.3577664 |
| 11/19/2013 18:50 | 0 | 264.377424  | 264.3579728 | 264.353048 | 264.370664 | 264.3557664 |
| 11/19/2013 19:00 | 0 | 264.3771192 | 264.3559728 | 264.351048 | 264.367664 | 264.3527664 |
| 11/19/2013 19:10 | 0 | 264.3771192 | 264.3589728 | 264.352048 | 264.367664 | 264.3557664 |
| 11/19/2013 19:20 | 0 | 264.3768144 | 264.3569728 | 264.353048 | 264.369664 | 264.3547664 |
| 11/19/2013 19:30 | 0 | 264.3768144 | 264.3569728 | 264.352048 | 264.367664 | 264.3527664 |
| 11/19/2013 19:40 | 0 | 264.3765096 | 264.3579728 | 264.355048 | 264.370664 | 264.3557664 |
| 11/19/2013 19:50 | 0 | 264.3768144 | 264.3579728 | 264.353048 | 264.370664 | 264.3537664 |
| 11/19/2013 20:00 | 0 | 264.3762048 | 264.3569728 | 264.352048 | 264.368664 | 264.3537664 |
| 11/19/2013 20:10 | 0 | 264.3765096 | 264.3559728 | 264.352048 | 264.368664 | 264.3537664 |
| 11/19/2013 20:20 | 0 | 264.3759    | 264.3559728 | 264.352048 | 264.368664 | 264.3537664 |
| 11/19/2013 20:30 | 0 | 264.3759    | 264.3559728 | 264.351048 | 264.370664 | 264.3557664 |
| 11/19/2013 20:40 | 0 | 264.3755952 | 264.3559728 | 264.351048 | 264.366664 | 264.3537664 |
| 11/19/2013 20:50 | 0 | 264.3755952 | 264.3559728 | 264.351048 | 264.366664 | 264.3537664 |
| 11/19/2013 21:00 | 0 | 264.3755952 | 264.3579728 | 264.351048 | 264.365664 | 264.3537664 |
| 11/19/2013 21:10 | 0 | 264.3755952 | 264.3549728 | 264.352048 | 264.366664 | 264.3517664 |
| 11/19/2013 21:20 | 0 | 264.3749856 | 264.3579728 | 264.352048 | 264.369664 | 264.3547664 |
| 11/19/2013 21:30 | 0 | 264.3752904 | 264.3559728 | 264.352048 | 264.366664 | 264.3537664 |
| 11/19/2013 21:40 | 0 | 264.3749856 | 264.3579728 | 264.352048 | 264.369664 | 264.3547664 |
| 11/19/2013 21:50 | 0 | 264.3749856 | 264.3579728 | 264.352048 | 264.367664 | 264.3527664 |
| 11/19/2013 22:00 | 0 | 264.3749856 | 264.3579728 | 264.352048 | 264.365664 | 264.3547664 |
| 11/19/2013 22:10 | 0 | 264.3746808 | 264.3559728 | 264.351048 | 264.367664 | 264.3527664 |

|                  |        |             |             |            |            |             |
|------------------|--------|-------------|-------------|------------|------------|-------------|
| 11/19/2013 22:20 | 0      | 264.3749856 | 264.3579728 | 264.351048 | 264.369664 | 264.3527664 |
| 11/19/2013 22:30 | 0      | 264.374376  | 264.3589728 | 264.353048 | 264.368664 | 264.3557664 |
| 11/19/2013 22:40 | 0      | 264.374376  | 264.3539728 | 264.351048 | 264.367664 | 264.3527664 |
| 11/19/2013 22:50 | 0      | 264.374376  | 264.3539728 | 264.349048 | 264.367664 | 264.3527664 |
| 11/19/2013 23:00 | 0      | 264.374376  | 264.3569728 | 264.352048 | 264.366664 | 264.3527664 |
| 11/19/2013 23:10 | 0      | 264.374376  | 264.3569728 | 264.352048 | 264.366664 | 264.3537664 |
| 11/19/2013 23:20 | 0      | 264.374376  | 264.3549728 | 264.351048 | 264.366664 | 264.3527664 |
| 11/19/2013 23:30 | 0      | 264.374376  | 264.3579728 | 264.351048 | 264.368664 | 264.3537664 |
| 11/19/2013 23:40 | 0      | 264.374376  | 264.3569728 | 264.352048 | 264.368664 | 264.3517664 |
| 11/19/2013 23:50 | 0      | 264.374376  | 264.3549728 | 264.351048 | 264.366664 | 264.3517664 |
| 11/20/2013 0:00  | 0      | 264.374376  | 264.3549728 | 264.351048 | 264.366664 | 264.3517664 |
| 11/20/2013 0:10  | 0      | 264.374376  | 264.3559728 | 264.351048 | 264.365664 | 264.3517664 |
| 11/20/2013 0:20  | 0      | 264.3746808 | 264.3579728 | 264.352048 | 264.366664 | 264.3517664 |
| 11/20/2013 0:30  | 0      | 264.3740712 | 264.3579728 | 264.352048 | 264.367664 | 264.3537664 |
| 11/20/2013 0:40  | 0      | 264.374376  | 264.3579728 | 264.354048 | 264.366664 | 264.3517664 |
| 11/20/2013 0:50  | 0      | 264.374376  | 264.3559728 | 264.352048 | 264.367664 | 264.3517664 |
| 11/20/2013 1:00  | 0      | 264.3740712 | 264.3579728 | 264.354048 | 264.367664 | 264.3527664 |
| 11/20/2013 1:10  | 0      | 264.374376  | 264.3579728 | 264.352048 | 264.366664 | 264.3517664 |
| 11/20/2013 1:20  | 0      | 264.3740712 | 264.3559728 | 264.351048 | 264.367664 | 264.3517664 |
| 11/20/2013 1:30  | 0      | 264.3740712 | 264.3559728 | 264.351048 | 264.367664 | 264.3517664 |
| 11/20/2013 1:40  | 0      | 264.3737664 | 264.3549728 | 264.352048 | 264.364664 | 264.3487664 |
| 11/20/2013 1:50  | 0      | 264.3740712 | 264.3559728 | 264.351048 | 264.364664 | 264.3497664 |
| 11/20/2013 2:00  | 0      | 264.3740712 | 264.3549728 | 264.350048 | 264.362664 | 264.3487664 |
| 11/20/2013 2:10  | 0      | 264.3740712 | 264.3559728 | 264.353048 | 264.365664 | 264.3497664 |
| 11/20/2013 2:20  | 0      | 264.3737664 | 264.3559728 | 264.353048 | 264.365664 | 264.3507664 |
| 11/20/2013 2:30  | 0      | 264.3740712 | 264.3529728 | 264.351048 | 264.365664 | 264.3497664 |
| 11/20/2013 2:40  | 0      | 264.3740712 | 264.3549728 | 264.351048 | 264.363664 | 264.3517664 |
| 11/20/2013 2:50  | 0      | 264.3737664 | 264.3559728 | 264.351048 | 264.365664 | 264.3497664 |
| 11/20/2013 3:00  | 0      | 264.3734616 | 264.3549728 | 264.350048 | 264.364664 | 264.3477664 |
| 11/20/2013 3:10  | 0      | 264.3737664 | 264.3539728 | 264.351048 | 264.363664 | 264.3497664 |
| 11/20/2013 3:20  | 0      | 264.3740712 | 264.3539728 | 264.351048 | 264.363664 | 264.3477664 |
| 11/20/2013 3:30  | 0      | 264.3737664 | 264.3539728 | 264.351048 | 264.364664 | 264.3507664 |
| 11/20/2013 3:40  | 0      | 264.3737664 | 264.3519728 | 264.350048 | 264.363664 | 264.3487664 |
| 11/20/2013 3:50  | 0      | 264.3734616 | 264.3549728 | 264.351048 | 264.365664 | 264.3497664 |
| 11/20/2013 4:00  | 0      | 264.3734616 | 264.3529728 | 264.350048 | 264.363664 | 264.3497664 |
| 11/20/2013 4:10  | 0      | 264.3731568 | 264.3519728 | 264.349048 | 264.364664 | 264.3467664 |
| 11/20/2013 4:20  | 0      | 264.372852  | 264.3529728 | 264.350048 | 264.363664 | 264.3477664 |
| 11/20/2013 4:30  | 0      | 264.3725472 | 264.3519728 | 264.347048 | 264.364664 | 264.3467664 |
| 11/20/2013 4:40  | 0      | 264.3725472 | 264.3529728 | 264.350048 | 264.363664 | 264.3497664 |
| 11/20/2013 4:50  | 0      | 264.3725472 | 264.3539728 | 264.350048 | 264.364664 | 264.3487664 |
| 11/20/2013 5:00  | 0.0254 | 264.3722424 | 264.3549728 | 264.349048 | 264.365664 | 264.3477664 |
| 11/20/2013 5:10  | 0.0508 | 264.3725472 | 264.3519728 | 264.349048 | 264.364664 | 264.3467664 |
| 11/20/2013 5:20  | 0.0508 | 264.3725472 | 264.3539728 | 264.350048 | 264.362664 | 264.3487664 |
| 11/20/2013 5:30  | 0.0508 | 264.3722424 | 264.3529728 | 264.349048 | 264.365664 | 264.3477664 |
| 11/20/2013 5:40  | 0.0762 | 264.3725472 | 264.3549728 | 264.350048 | 264.365664 | 264.3497664 |
| 11/20/2013 5:50  | 0.0762 | 264.372852  | 264.3519728 | 264.350048 | 264.363664 | 264.3487664 |
| 11/20/2013 6:00  | 0.0762 | 264.3731568 | 264.3549728 | 264.350048 | 264.364664 | 264.3497664 |

|                  |        |             |             |            |            |             |
|------------------|--------|-------------|-------------|------------|------------|-------------|
| 11/20/2013 6:10  | 0.0762 | 264.3731568 | 264.3549728 | 264.350048 | 264.364664 | 264.3487664 |
| 11/20/2013 6:20  | 0.0762 | 264.3734616 | 264.3539728 | 264.350048 | 264.364664 | 264.3487664 |
| 11/20/2013 6:30  | 0.0762 | 264.3734616 | 264.3549728 | 264.350048 | 264.361664 | 264.3477664 |
| 11/20/2013 6:40  | 0.0762 | 264.3737664 | 264.3559728 | 264.352048 | 264.362664 | 264.3487664 |
| 11/20/2013 6:50  | 0.0762 | 264.3734616 | 264.3569728 | 264.353048 | 264.364664 | 264.3497664 |
| 11/20/2013 7:00  | 0.0762 | 264.3734616 | 264.3539728 | 264.353048 | 264.364664 | 264.3487664 |
| 11/20/2013 7:10  | 0.0762 | 264.3734616 | 264.3559728 | 264.352048 | 264.362664 | 264.3487664 |
| 11/20/2013 7:20  | 0.0762 | 264.3731568 | 264.3539728 | 264.352048 | 264.362664 | 264.3487664 |
| 11/20/2013 7:30  | 0.0762 | 264.3734616 | 264.3559728 | 264.352048 | 264.364664 | 264.3517664 |
| 11/20/2013 7:40  | 0.0762 | 264.3737664 | 264.3539728 | 264.352048 | 264.364664 | 264.3497664 |
| 11/20/2013 7:50  | 0.0762 | 264.3734616 | 264.3559728 | 264.350048 | 264.362664 | 264.3487664 |
| 11/20/2013 8:00  | 0.0762 | 264.3734616 | 264.3539728 | 264.352048 | 264.361664 | 264.3487664 |
| 11/20/2013 8:10  | 0.0762 | 264.3734616 | 264.3529728 | 264.349048 | 264.361664 | 264.3477664 |
| 11/20/2013 8:20  | 0.0762 | 264.3731568 | 264.3569728 | 264.350048 | 264.364664 | 264.3487664 |
| 11/20/2013 8:30  | 0.0762 | 264.3731568 | 264.3559728 | 264.353048 | 264.362664 | 264.3467664 |
| 11/20/2013 8:40  | 0.0762 | 264.3731568 | 264.3539728 | 264.351048 | 264.360664 | 264.3467664 |
| 11/20/2013 8:50  | 0.0762 | 264.3731568 | 264.3529728 | 264.349048 | 264.362664 | 264.3457664 |
| 11/20/2013 9:00  | 0.0762 | 264.372852  | 264.3529728 | 264.351048 | 264.361664 | 264.3457664 |
| 11/20/2013 9:10  | 0.0762 | 264.372852  | 264.3549728 | 264.352048 | 264.364664 | 264.3497664 |
| 11/20/2013 9:20  | 0.0762 | 264.3725472 | 264.3529728 | 264.350048 | 264.363664 | 264.3477664 |
| 11/20/2013 9:30  | 0.0762 | 264.372852  | 264.3529728 | 264.352048 | 264.363664 | 264.3477664 |
| 11/20/2013 9:40  | 0.0762 | 264.3725472 | 264.3549728 | 264.351048 | 264.365664 | 264.3497664 |
| 11/20/2013 9:50  | 0.0762 | 264.3725472 | 264.3529728 | 264.351048 | 264.363664 | 264.3477664 |
| 11/20/2013 10:00 | 0.0762 | 264.3725472 | 264.3519728 | 264.350048 | 264.362664 | 264.3487664 |
| 11/20/2013 10:10 | 0.0762 | 264.3725472 | 264.3519728 | 264.352048 | 264.362664 | 264.3477664 |
| 11/20/2013 10:20 | 0.0762 | 264.3719376 | 264.3519728 | 264.350048 | 264.362664 | 264.3477664 |
| 11/20/2013 10:30 | 0.0762 | 264.3722424 | 264.3519728 | 264.350048 | 264.362664 | 264.3477664 |
| 11/20/2013 10:40 | 0.0762 | 264.3719376 | 264.3529728 | 264.350048 | 264.364664 | 264.3467664 |
| 11/20/2013 10:50 | 0.0762 | 264.3719376 | 264.3529728 | 264.352048 | 264.365664 | 264.3477664 |
| 11/20/2013 11:00 | 0.0762 | 264.3722424 | 264.3529728 | 264.352048 | 264.362664 | 264.3477664 |
| 11/20/2013 11:10 | 0.0762 | 264.3725472 | 264.3529728 | 264.352048 | 264.362664 | 264.3497664 |
| 11/20/2013 11:20 | 0.0762 | 264.3725472 | 264.3529728 | 264.352048 | 264.363664 | 264.3477664 |
| 11/20/2013 11:30 | 0.0762 | 264.3731568 | 264.3549728 | 264.350048 | 264.361664 | 264.3497664 |
| 11/20/2013 11:40 | 0.0762 | 264.372852  | 264.3559728 | 264.350048 | 264.361664 | 264.3497664 |
| 11/20/2013 11:50 | 0.0762 | 264.3725472 | 264.3539728 | 264.350048 | 264.362664 | 264.3487664 |
| 11/20/2013 12:00 | 0.0762 | 264.3731568 | 264.3559728 | 264.353048 | 264.364664 | 264.3507664 |
| 11/20/2013 12:10 | 0.0762 | 264.3731568 | 264.3539728 | 264.352048 | 264.362664 | 264.3487664 |
| 11/20/2013 12:20 | 0.0762 | 264.3731568 | 264.3549728 | 264.350048 | 264.362664 | 264.3487664 |
| 11/20/2013 12:30 | 0.0762 | 264.3731568 | 264.3539728 | 264.352048 | 264.363664 | 264.3497664 |
| 11/20/2013 12:40 | 0.0762 | 264.3734616 | 264.3549728 | 264.350048 | 264.363664 | 264.3477664 |
| 11/20/2013 12:50 | 0.0762 | 264.3734616 | 264.3549728 | 264.353048 | 264.362664 | 264.3487664 |
| 11/20/2013 13:00 | 0.0762 | 264.3731568 | 264.3549728 | 264.353048 | 264.362664 | 264.3467664 |
| 11/20/2013 13:10 | 0.0762 | 264.3737664 | 264.3529728 | 264.351048 | 264.362664 | 264.3467664 |
| 11/20/2013 13:20 | 0.0762 | 264.3731568 | 264.3539728 | 264.352048 | 264.363664 | 264.3497664 |
| 11/20/2013 13:30 | 0.0762 | 264.3731568 | 264.3519728 | 264.351048 | 264.360664 | 264.3467664 |
| 11/20/2013 13:40 | 0.0762 | 264.3731568 | 264.3539728 | 264.351048 | 264.361664 | 264.3477664 |
| 11/20/2013 13:50 | 0.0762 | 264.3731568 | 264.3569728 | 264.351048 | 264.362664 | 264.3487664 |

|                  |        |             |             |            |            |             |
|------------------|--------|-------------|-------------|------------|------------|-------------|
| 11/20/2013 14:00 | 0.0762 | 264.372852  | 264.3549728 | 264.352048 | 264.362664 | 264.3487664 |
| 11/20/2013 14:10 | 0.0762 | 264.372852  | 264.3549728 | 264.351048 | 264.361664 | 264.3497664 |
| 11/20/2013 14:20 | 0.0762 | 264.372852  | 264.3569728 | 264.352048 | 264.362664 | NA          |
| 11/20/2013 14:30 | 0.0762 | 264.3725472 | 264.3529728 | 264.351048 | 264.360664 | NA          |
| 11/20/2013 14:40 | 0.0762 | 264.3725472 | 264.3539728 | 264.351048 | 264.362664 | NA          |
| 11/20/2013 14:50 | 0.0762 | 264.3722424 | 264.3549728 | 264.350048 | 264.362664 | NA          |
| 11/20/2013 15:00 | 0.0762 | 264.3722424 | 264.3569728 | 264.351048 | 264.362664 | 264.3487664 |
| 11/20/2013 15:10 | 0.0762 | 264.3722424 | 264.3549728 | 264.351048 | 264.363664 | 264.3457664 |
| 11/20/2013 15:20 | 0.0762 | 264.3719376 | 264.3539728 | 264.350048 | 264.362664 | 264.3417664 |
| 11/20/2013 15:30 | 0.0762 | 264.3719376 | 264.3549728 | 264.351048 | 264.363664 | 264.3437664 |
| 11/20/2013 15:40 | 0.0762 | 264.3719376 | 264.3519728 | 264.350048 | 264.360664 | 264.3457664 |
| 11/20/2013 15:50 | 0.0762 | 264.3719376 | 264.3519728 | 264.350048 | 264.360664 | 264.3467664 |
| 11/20/2013 16:00 | 0.0762 | 264.3716328 | 264.3539728 | 264.351048 | 264.362664 | 264.3467664 |
| 11/20/2013 16:10 | 0.0762 | 264.3719376 | 264.3509728 | 264.348048 | 264.358664 | 264.3437664 |
| 11/20/2013 16:20 | 0.0762 | 264.3716328 | 264.3529728 | 264.350048 | 264.360664 | 264.3447664 |
| 11/20/2013 16:30 | 0.0762 | 264.3716328 | 264.3509728 | 264.348048 | 264.361664 | 264.3447664 |
| 11/20/2013 16:40 | 0.0762 | 264.3716328 | 264.3549728 | 264.351048 | 264.362664 | 264.3447664 |
| 11/20/2013 16:50 | 0.0762 | 264.3716328 | 264.3549728 | 264.351048 | 264.360664 | 264.3447664 |
| 11/20/2013 17:00 | 0.0762 | 264.371328  | 264.3519728 | 264.351048 | 264.360664 | 264.3457664 |
| 11/20/2013 17:10 | 0.0762 | 264.371328  | 264.3529728 | 264.344048 | 264.361664 | 264.3447664 |
| 11/20/2013 17:20 | 0.0762 | 264.3710232 | NA          | 264.345048 | 264.361664 | 264.3457664 |
| 11/20/2013 17:30 | 0.0762 | 264.371328  | NA          | 264.345048 | 264.361664 | 264.3477664 |
| 11/20/2013 17:40 | 0.0762 | 264.3710232 | 264.3479728 | 264.348048 | 264.361664 | 264.3477664 |
| 11/20/2013 17:50 | 0.0762 | 264.371328  | 264.3529728 | NA         | 264.358664 | 264.3487664 |
| 11/20/2013 18:00 | 0.0762 | 264.3710232 | 264.3549728 | NA         | 264.363664 | 264.3497664 |
| 11/20/2013 18:10 | 0.0762 | 264.3710232 | 264.3529728 | NA         | 264.358664 | 264.3487664 |
| 11/20/2013 18:20 | 0.0762 | 264.3710232 | 264.3549728 | NA         | 264.361664 | 264.3477664 |
| 11/20/2013 18:30 | 0.0762 | 264.3710232 | 264.3519728 | NA         | 264.358664 | 264.3457664 |
| 11/20/2013 18:40 | 0.0762 | 264.3707184 | 264.3519728 | NA         | 264.359664 | 264.3457664 |
| 11/20/2013 18:50 | 0.0762 | 264.3707184 | 264.3559728 | NA         | 264.359664 | 264.3477664 |
| 11/20/2013 19:00 | 0.0762 | 264.3710232 | 264.3559728 | NA         | 264.361664 | 264.3477664 |
| 11/20/2013 19:10 | 0.0762 | 264.3707184 | 264.3529728 | NA         | 264.359664 | 264.3457664 |
| 11/20/2013 19:20 | 0.0762 | 264.3710232 | 264.3559728 | NA         | 264.363664 | 264.3487664 |
| 11/20/2013 19:30 | 0.0762 | 264.3704136 | 264.3529728 | 264.329048 | 264.360664 | 264.3457664 |
| 11/20/2013 19:40 | 0.0762 | 264.3707184 | 264.3549728 | 264.338048 | 264.360664 | 264.3467664 |
| 11/20/2013 19:50 | 0.0762 | 264.3707184 | 264.3509728 | 264.342048 | 264.359664 | 264.3457664 |
| 11/20/2013 20:00 | 0.0762 | 264.3707184 | 264.3529728 | 264.347048 | 264.361664 | 264.3467664 |
| 11/20/2013 20:10 | 0.0762 | 264.3707184 | 264.3529728 | 264.350048 | 264.361664 | 264.3467664 |
| 11/20/2013 20:20 | 0.0762 | 264.3707184 | 264.3519728 | 264.350048 | 264.359664 | 264.3457664 |
| 11/20/2013 20:30 | 0.0762 | 264.3707184 | 264.3549728 | 264.350048 | 264.359664 | 264.3457664 |
| 11/20/2013 20:40 | 0.0762 | 264.3704136 | 264.3539728 | 264.351048 | 264.358664 | 264.3457664 |
| 11/20/2013 20:50 | 0.0762 | 264.3707184 | 264.3529728 | 264.351048 | 264.359664 | 264.3447664 |
| 11/20/2013 21:00 | 0.0762 | 264.3707184 | 264.3539728 | 264.351048 | 264.358664 | 264.3467664 |
| 11/20/2013 21:10 | 0.0762 | 264.3707184 | 264.3539728 | 264.353048 | 264.360664 | 264.3477664 |
| 11/20/2013 21:20 | 0.0762 | 264.3707184 | 264.3529728 | 264.354048 | 264.359664 | 264.3447664 |
| 11/20/2013 21:30 | 0.0762 | 264.3707184 | 264.3539728 | 264.354048 | 264.363664 | 264.3467664 |
| 11/20/2013 21:40 | 0.0762 | 264.3707184 | 264.3549728 | 264.354048 | 264.361664 | 264.3437664 |

|                  |        |             |             |            |            |             |
|------------------|--------|-------------|-------------|------------|------------|-------------|
| 11/20/2013 21:50 | 0.0762 | 264.3707184 | 264.3549728 | 264.354048 | 264.361664 | 264.3467664 |
| 11/20/2013 22:00 | 0.0762 | 264.3710232 | 264.3549728 | 264.354048 | 264.363664 | 264.3457664 |
| 11/20/2013 22:10 | 0.0762 | 264.3710232 | 264.3549728 | 264.355048 | 264.358664 | 264.3437664 |
| 11/20/2013 22:20 | 0.0762 | 264.3710232 | 264.3529728 | 264.354048 | 264.360664 | 264.3437664 |
| 11/20/2013 22:30 | 0.0762 | 264.3710232 | 264.3549728 | 264.355048 | 264.362664 | 264.3457664 |
| 11/20/2013 22:40 | 0.0762 | 264.371328  | 264.3569728 | 264.354048 | 264.360664 | 264.3457664 |
| 11/20/2013 22:50 | 0.0762 | 264.371328  | 264.3579728 | 264.354048 | 264.362664 | 264.3457664 |
| 11/20/2013 23:00 | 0.0762 | 264.371328  | 264.3549728 | 264.355048 | 264.361664 | 264.3467664 |
| 11/20/2013 23:10 | 0.0762 | 264.3716328 | 264.3569728 | 264.355048 | 264.363664 | 264.3487664 |
| 11/20/2013 23:20 | 0.0762 | 264.3719376 | 264.3529728 | 264.352048 | 264.358664 | 264.3457664 |
| 11/20/2013 23:30 | 0.0762 | 264.3719376 | 264.3559728 | 264.356048 | 264.361664 | 264.3467664 |
| 11/20/2013 23:40 | 0.0762 | 264.3722424 | 264.3559728 | 264.355048 | 264.357664 | 264.3467664 |
| 11/20/2013 23:50 | 0.0762 | 264.3722424 | 264.3569728 | 264.356048 | 264.359664 | 264.3467664 |
| 11/21/2013 0:00  | 0      | 264.3719376 | 264.3559728 | 264.358048 | 264.362664 | 264.3477664 |
| 11/21/2013 0:10  | 0      | 264.3716328 | 264.3549728 | 264.355048 | 264.359664 | 264.3477664 |
| 11/21/2013 0:20  | 0      | 264.3716328 | 264.3549728 | 264.355048 | 264.360664 | 264.3477664 |
| 11/21/2013 0:30  | 0      | 264.3716328 | 264.3559728 | 264.355048 | 264.361664 | 264.3477664 |
| 11/21/2013 0:40  | 0      | 264.3716328 | 264.3529728 | 264.356048 | 264.361664 | 264.3477664 |
| 11/21/2013 0:50  | 0      | 264.3716328 | 264.3539728 | 264.355048 | 264.360664 | 264.3447664 |
| 11/21/2013 1:00  | 0      | 264.371328  | 264.3549728 | 264.355048 | 264.358664 | 264.3467664 |
| 11/21/2013 1:10  | 0      | 264.371328  | 264.3539728 | 264.355048 | 264.360664 | 264.3447664 |
| 11/21/2013 1:20  | 0      | 264.371328  | 264.3519728 | 264.352048 | 264.360664 | 264.3467664 |
| 11/21/2013 1:30  | 0      | 264.371328  | 264.3539728 | 264.353048 | 264.360664 | 264.3467664 |
| 11/21/2013 1:40  | 0      | 264.371328  | 264.3539728 | 264.353048 | 264.361664 | 264.3447664 |
| 11/21/2013 1:50  | 0      | 264.371328  | 264.3519728 | 264.353048 | 264.360664 | 264.3447664 |
| 11/21/2013 2:00  | 0      | 264.371328  | 264.3519728 | 264.353048 | 264.358664 | 264.3447664 |
| 11/21/2013 2:10  | 0      | 264.3710232 | 264.3539728 | 264.355048 | 264.360664 | 264.3447664 |
| 11/21/2013 2:20  | 0      | 264.3710232 | 264.3519728 | 264.355048 | 264.358664 | 264.3467664 |
| 11/21/2013 2:30  | 0      | 264.3710232 | 264.3519728 | 264.353048 | 264.358664 | 264.3467664 |
| 11/21/2013 2:40  | 0      | 264.3710232 | 264.3539728 | 264.354048 | 264.360664 | 264.3457664 |
| 11/21/2013 2:50  | 0      | 264.3710232 | 264.3549728 | 264.354048 | 264.358664 | 264.3467664 |
| 11/21/2013 3:00  | 0      | 264.3707184 | 264.3539728 | 264.355048 | 264.359664 | 264.3457664 |
| 11/21/2013 3:10  | 0      | 264.3707184 | 264.3539728 | 264.353048 | 264.359664 | 264.3457664 |
| 11/21/2013 3:20  | 0      | 264.3707184 | 264.3529728 | 264.353048 | 264.359664 | 264.3467664 |
| 11/21/2013 3:30  | 0      | 264.3707184 | 264.3529728 | 264.352048 | 264.358664 | 264.3447664 |
| 11/21/2013 3:40  | 0      | 264.3707184 | 264.3519728 | 264.352048 | 264.355664 | 264.3437664 |
| 11/21/2013 3:50  | 0      | 264.3704136 | 264.3509728 | 264.350048 | 264.357664 | 264.3437664 |
| 11/21/2013 4:00  | 0      | 264.3704136 | 264.3519728 | 264.352048 | 264.357664 | 264.3437664 |
| 11/21/2013 4:10  | 0      | 264.3704136 | 264.3519728 | 264.352048 | 264.359664 | 264.3457664 |
| 11/21/2013 4:20  | 0      | 264.3701088 | 264.3519728 | 264.352048 | 264.358664 | 264.3457664 |
| 11/21/2013 4:30  | 0      | 264.3701088 | 264.3519728 | 264.354048 | 264.359664 | 264.3477664 |
| 11/21/2013 4:40  | 0      | 264.3701088 | 264.3519728 | 264.352048 | 264.358664 | 264.3457664 |
| 11/21/2013 4:50  | 0      | 264.3701088 | 264.3519728 | 264.353048 | 264.359664 | 264.3447664 |
| 11/21/2013 5:00  | 0      | 264.369804  | 264.3519728 | 264.353048 | 264.358664 | 264.3447664 |
| 11/21/2013 5:10  | 0.0254 | 264.369804  | 264.3529728 | 264.353048 | 264.360664 | 264.3447664 |
| 11/21/2013 5:20  | 0.0254 | 264.369804  | 264.3529728 | 264.354048 | 264.358664 | 264.3447664 |
| 11/21/2013 5:30  | 0.0254 | 264.369804  | 264.3529728 | 264.354048 | 264.360664 | 264.3467664 |

|                  |        |             |             |            |            |             |
|------------------|--------|-------------|-------------|------------|------------|-------------|
| 11/21/2013 5:40  | 0.0254 | 264.369804  | 264.3529728 | 264.352048 | 264.357664 | 264.3437664 |
| 11/21/2013 5:50  | 0.0254 | 264.3694992 | 264.3499728 | 264.351048 | 264.354664 | 264.3427664 |
| 11/21/2013 6:00  | 0.0254 | 264.3694992 | 264.3519728 | 264.352048 | 264.359664 | 264.3437664 |
| 11/21/2013 6:10  | 0.0254 | 264.3694992 | 264.3509728 | 264.351048 | 264.358664 | 264.3427664 |
| 11/21/2013 6:20  | 0.0254 | 264.3694992 | 264.3509728 | 264.350048 | 264.356664 | 264.3447664 |
| 11/21/2013 6:30  | 0.0254 | 264.3694992 | 264.3509728 | 264.353048 | 264.356664 | 264.3447664 |
| 11/21/2013 6:40  | 0.0254 | 264.3691944 | 264.3509728 | 264.353048 | 264.356664 | 264.3447664 |
| 11/21/2013 6:50  | 0.0254 | 264.3691944 | 264.3509728 | 264.353048 | 264.356664 | 264.3457664 |
| 11/21/2013 7:00  | 0.0254 | 264.3691944 | 264.3539728 | 264.353048 | 264.358664 | 264.3457664 |
| 11/21/2013 7:10  | 0.0254 | 264.3691944 | 264.3509728 | 264.353048 | 264.357664 | 264.3447664 |
| 11/21/2013 7:20  | 0.0254 | 264.3688896 | 264.3509728 | 264.351048 | 264.355664 | 264.3467664 |
| 11/21/2013 7:30  | 0.0254 | 264.3688896 | 264.3499728 | 264.350048 | 264.356664 | 264.3427664 |
| 11/21/2013 7:40  | 0.0254 | 264.3688896 | 264.3529728 | 264.352048 | 264.359664 | 264.3457664 |
| 11/21/2013 7:50  | 0.0254 | 264.3685848 | 264.3489728 | 264.348048 | 264.353664 | 264.3427664 |
| 11/21/2013 8:00  | 0.0254 | 264.3685848 | 264.3489728 | 264.350048 | 264.356664 | 264.3427664 |
| 11/21/2013 8:10  | 0.0254 | 264.3685848 | 264.3499728 | 264.349048 | 264.355664 | 264.3427664 |
| 11/21/2013 8:20  | 0.0254 | 264.36828   | 264.3499728 | 264.350048 | 264.354664 | 264.3427664 |
| 11/21/2013 8:30  | 0.0254 | 264.36828   | 264.3509728 | 264.349048 | 264.357664 | 264.3437664 |
| 11/21/2013 8:40  | 0.0254 | 264.36828   | 264.3519728 | 264.350048 | 264.356664 | 264.3437664 |
| 11/21/2013 8:50  | 0.0254 | 264.3679752 | 264.3489728 | 264.349048 | 264.357664 | 264.3427664 |
| 11/21/2013 9:00  | 0.0254 | 264.36828   | 264.3499728 | 264.350048 | 264.356664 | 264.3437664 |
| 11/21/2013 9:10  | 0.0254 | 264.3679752 | 264.3509728 | 264.350048 | 264.356664 | 264.3427664 |
| 11/21/2013 9:20  | 0.0254 | 264.36828   | 264.3479728 | 264.350048 | 264.355664 | 264.3427664 |
| 11/21/2013 9:30  | 0.0254 | 264.3679752 | 264.3499728 | 264.349048 | 264.355664 | 264.3427664 |
| 11/21/2013 9:40  | 0.0254 | 264.3679752 | 264.3499728 | 264.349048 | 264.354664 | 264.3427664 |
| 11/21/2013 9:50  | 0.0254 | 264.3679752 | 264.3509728 | 264.349048 | 264.355664 | 264.3427664 |
| 11/21/2013 10:00 | 0.0254 | 264.3679752 | 264.3509728 | 264.352048 | 264.357664 | 264.3457664 |
| 11/21/2013 10:10 | 0.0254 | 264.3679752 | 264.3509728 | 264.350048 | 264.356664 | 264.3447664 |
| 11/21/2013 10:20 | 0.0254 | 264.3676704 | 264.3489728 | 264.350048 | 264.356664 | 264.3457664 |
| 11/21/2013 10:30 | 0.0254 | 264.3676704 | 264.3509728 | 264.350048 | 264.355664 | 264.3447664 |
| 11/21/2013 10:40 | 0.0254 | 264.3676704 | 264.3519728 | 264.352048 | 264.357664 | 264.3437664 |
| 11/21/2013 10:50 | 0.0254 | 264.3676704 | 264.3489728 | 264.350048 | 264.357664 | 264.3457664 |
| 11/21/2013 11:00 | 0.0254 | 264.3676704 | 264.3509728 | 264.350048 | 264.357664 | 264.3457664 |
| 11/21/2013 11:10 | 0.0254 | 264.3673656 | 264.3499728 | 264.351048 | 264.358664 | 264.3467664 |
| 11/21/2013 11:20 | 0.0254 | 264.3673656 | 264.3499728 | 264.350048 | 264.354664 | 264.3437664 |
| 11/21/2013 11:30 | 0.0254 | 264.3673656 | 264.3499728 | 264.350048 | 264.355664 | 264.3447664 |
| 11/21/2013 11:40 | 0.0254 | 264.3673656 | 264.3489728 | 264.348048 | 264.355664 | 264.3427664 |
| 11/21/2013 11:50 | 0.0254 | 264.3673656 | 264.3489728 | 264.350048 | 264.355664 | 264.3447664 |
| 11/21/2013 12:00 | 0.0254 | 264.3673656 | 264.3509728 | 264.350048 | 264.357664 | 264.3467664 |
| 11/21/2013 12:10 | 0.0254 | 264.3673656 | 264.3489728 | 264.350048 | 264.355664 | 264.3447664 |
| 11/21/2013 12:20 | 0.0254 | 264.3673656 | 264.3479728 | 264.347048 | 264.354664 | 264.3417664 |
| 11/21/2013 12:30 | 0.0254 | 264.3673656 | 264.3509728 | 264.350048 | 264.357664 | 264.3437664 |
| 11/21/2013 12:40 | 0.0254 | 264.3673656 | 264.3479728 | 264.347048 | 264.354664 | 264.3437664 |
| 11/21/2013 12:50 | 0.0254 | 264.3673656 | 264.3499728 | 264.348048 | 264.354664 | 264.3417664 |
| 11/21/2013 13:00 | 0.0254 | 264.3673656 | 264.3479728 | 264.348048 | 264.354664 | 264.3417664 |
| 11/21/2013 13:10 | 0.0254 | 264.3673656 | 264.3479728 | 264.350048 | 264.357664 | 264.3417664 |
| 11/21/2013 13:20 | 0.0254 | 264.3670608 | 264.3449728 | 264.345048 | 264.353664 | 264.3387664 |

|                  |        |             |             |            |            |             |
|------------------|--------|-------------|-------------|------------|------------|-------------|
| 11/21/2013 13:30 | 0.0254 | 264.3673656 | 264.3479728 | 264.348048 | 264.356664 | 264.3417664 |
| 11/21/2013 13:40 | 0.0254 | 264.3673656 | 264.3479728 | 264.348048 | 264.354664 | 264.3417664 |
| 11/21/2013 13:50 | 0.0254 | 264.366756  | 264.3479728 | 264.347048 | 264.352664 | 264.3397664 |
| 11/21/2013 14:00 | 0.0254 | 264.359136  | 264.3459728 | 264.347048 | 264.356664 | 264.3397664 |
| 11/21/2013 14:10 | 0.0254 | 264.3673656 | 264.3459728 | 264.347048 | 264.355664 | 264.3417664 |
| 11/21/2013 14:20 | 0.0254 | 264.3676704 | 264.3479728 | 264.347048 | 264.356664 | 264.3417664 |
| 11/21/2013 14:30 | 0.0254 | 264.3673656 | 264.3459728 | 264.345048 | 264.354664 | 264.3417664 |
| 11/21/2013 14:40 | 0.0254 | 264.3676704 | 264.3479728 | 264.347048 | 264.354664 | 264.3417664 |
| 11/21/2013 14:50 | 0.0254 | 264.3673656 | 264.3479728 | 264.348048 | 264.354664 | 264.3417664 |
| 11/21/2013 15:00 | 0.0254 | 264.3673656 | 264.3509728 | 264.347048 | 264.356664 | 264.3437664 |
| 11/21/2013 15:10 | 0.0254 | 264.3676704 | 264.3499728 | 264.348048 | 264.354664 | 264.3437664 |
| 11/21/2013 15:20 | 0.0254 | 264.3676704 | 264.3489728 | 264.348048 | 264.353664 | 264.3407664 |
| 11/21/2013 15:30 | 0.0254 | 264.3673656 | 264.3499728 | 264.348048 | 264.355664 | 264.3427664 |
| 11/21/2013 15:40 | 0.0254 | 264.3673656 | 264.3489728 | 264.348048 | 264.356664 | 264.3427664 |
| 11/21/2013 15:50 | 0.0254 | 264.3673656 | 264.3489728 | 264.347048 | 264.354664 | 264.3427664 |
| 11/21/2013 16:00 | 0.0254 | 264.3673656 | 264.3469728 | 264.348048 | 264.352664 | 264.3417664 |
| 11/21/2013 16:10 | 0.0254 | 264.3676704 | 264.3489728 | 264.346048 | 264.354664 | 264.3417664 |
| 11/21/2013 16:20 | 0.0254 | 264.3673656 | 264.3489728 | 264.349048 | 264.355664 | 264.3417664 |
| 11/21/2013 16:30 | 0.0254 | 264.3676704 | 264.3509728 | 264.349048 | 264.355664 | 264.3437664 |
| 11/21/2013 16:40 | 0.0254 | 264.3673656 | 264.3509728 | 264.349048 | 264.355664 | 264.3437664 |
| 11/21/2013 16:50 | 0.0254 | 264.3673656 | 264.3469728 | 264.346048 | 264.353664 | 264.3417664 |
| 11/21/2013 17:00 | 0.0254 | 264.3676704 | 264.3499728 | 264.349048 | 264.354664 | 264.3427664 |
| 11/21/2013 17:10 | 0.0254 | 264.3673656 | 264.3469728 | 264.347048 | 264.355664 | 264.3417664 |
| 11/21/2013 17:20 | 0.0254 | 264.3673656 | 264.3479728 | 264.347048 | 264.354664 | 264.3407664 |
| 11/21/2013 17:30 | 0.0254 | 264.3673656 | 264.3489728 | 264.349048 | 264.355664 | 264.3437664 |
| 11/21/2013 17:40 | 0.0254 | 264.3670608 | 264.3499728 | 264.349048 | 264.354664 | 264.3437664 |
| 11/21/2013 17:50 | 0.0254 | 264.3673656 | 264.3479728 | 264.347048 | 264.356664 | 264.3417664 |
| 11/21/2013 18:00 | 0.0254 | 264.3673656 | 264.3479728 | 264.347048 | 264.353664 | 264.3417664 |
| 11/21/2013 18:10 | 0.0254 | 264.3673656 | 264.3489728 | 264.348048 | 264.354664 | 264.3407664 |
| 11/21/2013 18:20 | 0.0254 | 264.3673656 | 264.3489728 | 264.347048 | 264.355664 | 264.3417664 |
| 11/21/2013 18:30 | 0.0254 | 264.3676704 | 264.3479728 | 264.347048 | 264.354664 | 264.3427664 |
| 11/21/2013 18:40 | 0.0254 | 264.3676704 | 264.3479728 | 264.348048 | 264.357664 | 264.3407664 |
| 11/21/2013 18:50 | 0.0254 | 264.3679752 | 264.3509728 | 264.348048 | 264.357664 | 264.3427664 |
| 11/21/2013 19:00 | 0.0254 | 264.36828   | 264.3499728 | 264.348048 | 264.354664 | 264.3437664 |
| 11/21/2013 19:10 | 0.0254 | 264.36828   | 264.3469728 | 264.348048 | 264.353664 | 264.3427664 |
| 11/21/2013 19:20 | 0.0254 | 264.36828   | 264.3489728 | 264.349048 | 264.355664 | 264.3427664 |
| 11/21/2013 19:30 | 0.0254 | 264.3685848 | 264.3499728 | 264.351048 | 264.356664 | 264.3417664 |
| 11/21/2013 19:40 | 0.0254 | 264.36828   | 264.3509728 | 264.349048 | 264.355664 | 264.3427664 |
| 11/21/2013 19:50 | 0.0254 | 264.3679752 | 264.3489728 | 264.351048 | 264.355664 | 264.3427664 |
| 11/21/2013 20:00 | 0.0254 | 264.3679752 | 264.3479728 | 264.349048 | 264.351664 | 264.3437664 |
| 11/21/2013 20:10 | 0.0254 | 264.36828   | 264.3479728 | 264.349048 | 264.354664 | 264.3427664 |
| 11/21/2013 20:20 | 0.0254 | 264.36828   | 264.3499728 | 264.349048 | 264.354664 | 264.3417664 |
| 11/21/2013 20:30 | 0.0254 | 264.3679752 | 264.3479728 | 264.348048 | 264.352664 | 264.3417664 |
| 11/21/2013 20:40 | 0.0254 | 264.3685848 | 264.3499728 | 264.349048 | 264.353664 | 264.3417664 |
| 11/21/2013 20:50 | 0.0254 | 264.36828   | 264.3469728 | 264.345048 | 264.350664 | 264.3407664 |
| 11/21/2013 21:00 | 0.0254 | 264.3679752 | 264.3489728 | 264.349048 | 264.353664 | 264.3427664 |
| 11/21/2013 21:10 | 0.0254 | 264.3679752 | 264.3489728 | 264.351048 | 264.352664 | 264.3427664 |

|                  |        |             |             |            |            |             |
|------------------|--------|-------------|-------------|------------|------------|-------------|
| 11/21/2013 21:20 | 0.0254 | 264.3679752 | 264.3479728 | 264.347048 | 264.352664 | 264.3397664 |
| 11/21/2013 21:30 | 0.0254 | 264.3679752 | 264.3459728 | 264.346048 | 264.351664 | 264.3407664 |
| 11/21/2013 21:40 | 0.0254 | 264.3676704 | 264.3499728 | 264.348048 | 264.354664 | 264.3407664 |
| 11/21/2013 21:50 | 0.0254 | 264.3673656 | 264.3459728 | 264.345048 | 264.353664 | 264.3377664 |
| 11/21/2013 22:00 | 0.0254 | 264.3673656 | 264.3469728 | 264.348048 | 264.352664 | 264.3407664 |
| 11/21/2013 22:10 | 0.0254 | 264.3676704 | 264.3489728 | 264.348048 | 264.354664 | 264.3407664 |
| 11/21/2013 22:20 | 0.0254 | 264.3676704 | 264.3459728 | 264.346048 | 264.351664 | 264.3397664 |
| 11/21/2013 22:30 | 0.0254 | 264.3673656 | 264.3489728 | 264.348048 | 264.353664 | 264.3417664 |
| 11/21/2013 22:40 | 0.0254 | 264.3673656 | 264.3469728 | 264.347048 | 264.353664 | 264.3397664 |
| 11/21/2013 22:50 | 0.0254 | 264.3670608 | 264.3489728 | 264.349048 | 264.353664 | 264.3437664 |
| 11/21/2013 23:00 | 0.0254 | 264.3673656 | 264.3489728 | 264.349048 | 264.354664 | 264.3427664 |
| 11/21/2013 23:10 | 0.0254 | 264.3673656 | 264.3489728 | 264.345048 | 264.351664 | 264.3417664 |
| 11/21/2013 23:20 | 0.0254 | 264.3673656 | 264.3479728 | 264.347048 | 264.353664 | 264.3427664 |
| 11/21/2013 23:30 | 0.0254 | 264.3673656 | 264.3489728 | 264.347048 | 264.352664 | 264.3417664 |
| 11/21/2013 23:40 | 0.0254 | 264.3673656 | 264.3489728 | 264.348048 | 264.353664 | 264.3437664 |
| 11/21/2013 23:50 | 0.0254 | 264.3676704 | 264.3489728 | 264.348048 | 264.352664 | 264.3417664 |
| 11/22/2013 0:00  | 0      | 264.3676704 | 264.3489728 | 264.347048 | 264.354664 | 264.3407664 |
| 11/22/2013 0:10  | 0      | 264.3679752 | 264.3489728 | 264.348048 | 264.355664 | 264.3447664 |
| 11/22/2013 0:20  | 0      | 264.3679752 | 264.3499728 | 264.345048 | 264.354664 | 264.3397664 |
| 11/22/2013 0:30  | 0      | 264.3679752 | 264.3519728 | 264.349048 | 264.354664 | 264.3437664 |
| 11/22/2013 0:40  | 0      | 264.3679752 | 264.3519728 | 264.350048 | 264.354664 | 264.3417664 |
| 11/22/2013 0:50  | 0      | 264.36828   | 264.3489728 | 264.350048 | 264.353664 | 264.3407664 |
| 11/22/2013 1:00  | 0      | 264.36828   | 264.3509728 | 264.350048 | 264.353664 | 264.3427664 |
| 11/22/2013 1:10  | 0      | 264.3685848 | 264.3509728 | 264.350048 | 264.352664 | 264.3417664 |
| 11/22/2013 1:20  | 0      | 264.3688896 | 264.3529728 | 264.352048 | 264.353664 | 264.3427664 |
| 11/22/2013 1:30  | 0      | 264.3685848 | 264.3519728 | 264.349048 | 264.351664 | 264.3427664 |
| 11/22/2013 1:40  | 0      | 264.3685848 | 264.3519728 | 264.350048 | 264.353664 | 264.3427664 |
| 11/22/2013 1:50  | 0      | 264.3691944 | 264.3509728 | 264.351048 | 264.353664 | 264.3437664 |
| 11/22/2013 2:00  | 0      | 264.3691944 | 264.3509728 | 264.349048 | 264.351664 | 264.3417664 |
| 11/22/2013 2:10  | 0      | 264.3688896 | 264.3509728 | 264.351048 | 264.354664 | 264.3417664 |
| 11/22/2013 2:20  | 0      | 264.3691944 | 264.3529728 | 264.350048 | 264.355664 | 264.3437664 |
| 11/22/2013 2:30  | 0      | 264.3688896 | 264.3509728 | 264.350048 | 264.352664 | 264.3397664 |
| 11/22/2013 2:40  | 0      | 264.3688896 | 264.3489728 | 264.350048 | 264.352664 | 264.3417664 |
| 11/22/2013 2:50  | 0      | 264.3694992 | 264.3519728 | 264.349048 | 264.352664 | 264.3427664 |
| 11/22/2013 3:00  | 0      | 264.3688896 | 264.3509728 | 264.350048 | 264.355664 | 264.3427664 |
| 11/22/2013 3:10  | 0      | 264.3688896 | 264.3509728 | 264.350048 | 264.353664 | 264.3417664 |
| 11/22/2013 3:20  | 0      | 264.3691944 | 264.3499728 | 264.348048 | 264.351664 | 264.3417664 |
| 11/22/2013 3:30  | 0      | 264.3691944 | 264.3499728 | 264.348048 | 264.352664 | 264.3427664 |
| 11/22/2013 3:40  | 0      | 264.3691944 | 264.3519728 | 264.350048 | 264.352664 | 264.3427664 |
| 11/22/2013 3:50  | 0      | 264.3688896 | 264.3499728 | 264.351048 | 264.352664 | 264.3417664 |
| 11/22/2013 4:00  | 0      | 264.3688896 | 264.3499728 | 264.352048 | 264.354664 | 264.3447664 |
| 11/22/2013 4:10  | 0      | 264.3688896 | 264.3519728 | 264.350048 | 264.352664 | 264.3447664 |
| 11/22/2013 4:20  | 0      | 264.3688896 | 264.3509728 | 264.350048 | 264.350664 | 264.3417664 |
| 11/22/2013 4:30  | 0      | 264.3685848 | 264.3509728 | 264.349048 | 264.352664 | 264.3417664 |
| 11/22/2013 4:40  | 0      | 264.3685848 | 264.3489728 | 264.349048 | 264.352664 | 264.3417664 |
| 11/22/2013 4:50  | 0      | 264.3688896 | 264.3489728 | 264.351048 | 264.353664 | 264.3417664 |
| 11/22/2013 5:00  | 0      | 264.36828   | 264.3539728 | 264.352048 | 264.355664 | 264.3447664 |



|                  |   |             |             |            |            |             |
|------------------|---|-------------|-------------|------------|------------|-------------|
| 11/22/2013 5:10  | 0 | 264.3685848 | 264.3479728 | 264.348048 | 264.349664 | 264.3407664 |
| 11/22/2013 5:20  | 0 | 264.3688896 | 264.3499728 | 264.350048 | 264.351664 | 264.3427664 |
| 11/22/2013 5:30  | 0 | 264.3685848 | 264.3509728 | 264.349048 | 264.351664 | 264.3407664 |
| 11/22/2013 5:40  | 0 | 264.3685848 | 264.3519728 | 264.349048 | 264.351664 | 264.3417664 |
| 11/22/2013 5:50  | 0 | 264.36828   | 264.3479728 | 264.350048 | 264.351664 | 264.3417664 |
| 11/22/2013 6:00  | 0 | 264.3685848 | 264.3489728 | 264.349048 | 264.351664 | 264.3407664 |
| 11/22/2013 6:10  | 0 | 264.3685848 | 264.3489728 | 264.350048 | 264.351664 | 264.3427664 |
| 11/22/2013 6:20  | 0 | 264.36828   | 264.3509728 | 264.350048 | 264.351664 | 264.3447664 |
| 11/22/2013 6:30  | 0 | 264.36828   | 264.3499728 | 264.350048 | 264.352664 | 264.3407664 |
| 11/22/2013 6:40  | 0 | 264.36828   | 264.3489728 | 264.349048 | 264.349664 | 264.3407664 |
| 11/22/2013 6:50  | 0 | 264.3679752 | 264.3499728 | 264.349048 | 264.352664 | 264.3417664 |
| 11/22/2013 7:00  | 0 | 264.36828   | 264.3509728 | 264.353048 | 264.355664 | 264.3427664 |
| 11/22/2013 7:10  | 0 | 264.36828   | 264.3499728 | 264.350048 | 264.353664 | 264.3417664 |
| 11/22/2013 7:20  | 0 | 264.36828   | 264.3509728 | 264.350048 | 264.353664 | 264.3427664 |
| 11/22/2013 7:30  | 0 | 264.36828   | 264.3489728 | 264.349048 | 264.350664 | 264.3397664 |
| 11/22/2013 7:40  | 0 | 264.36828   | 264.3479728 | 264.348048 | 264.352664 | 264.3397664 |
| 11/22/2013 7:50  | 0 | 264.3679752 | 264.3479728 | 264.348048 | 264.353664 | 264.3407664 |
| 11/22/2013 8:00  | 0 | 264.36828   | 264.3479728 | 264.347048 | 264.350664 | 264.3397664 |
| 11/22/2013 8:10  | 0 | 264.3679752 | 264.3509728 | 264.347048 | 264.351664 | 264.3407664 |
| 11/22/2013 8:20  | 0 | 264.3679752 | 264.3479728 | 264.347048 | 264.351664 | 264.3387664 |
| 11/22/2013 8:30  | 0 | 264.3679752 | 264.3469728 | 264.347048 | 264.351664 | 264.3407664 |
| 11/22/2013 8:40  | 0 | 264.3679752 | 264.3489728 | 264.348048 | 264.352664 | 264.3407664 |
| 11/22/2013 8:50  | 0 | 264.3676704 | 264.3479728 | 264.350048 | 264.353664 | 264.3407664 |
| 11/22/2013 9:00  | 0 | 264.3679752 | 264.3499728 | 264.350048 | 264.349664 | 264.3417664 |
| 11/22/2013 9:10  | 0 | 264.3676704 | 264.3479728 | 264.350048 | 264.348664 | 264.3407664 |
| 11/22/2013 9:20  | 0 | 264.3673656 | 264.3479728 | 264.348048 | 264.351664 | 264.3417664 |
| 11/22/2013 9:30  | 0 | 264.3676704 | 264.3479728 | 264.348048 | 264.353664 | 264.3417664 |
| 11/22/2013 9:40  | 0 | 264.3676704 | 264.3479728 | 264.347048 | 264.351664 | 264.3407664 |
| 11/22/2013 9:50  | 0 | 264.3673656 | 264.3509728 | 264.348048 | 264.353664 | 264.3437664 |
| 11/22/2013 10:00 | 0 | 264.3676704 | 264.3479728 | 264.348048 | 264.349664 | 264.3417664 |
| 11/22/2013 10:10 | 0 | 264.3673656 | 264.3479728 | 264.348048 | 264.349664 | 264.3407664 |
| 11/22/2013 10:20 | 0 | 264.3673656 | 264.3469728 | 264.347048 | 264.350664 | 264.3387664 |
| 11/22/2013 10:30 | 0 | 264.3673656 | 264.3469728 | 264.345048 | 264.348664 | 264.3407664 |
| 11/22/2013 10:40 | 0 | 264.3670608 | 264.3469728 | 264.346048 | 264.349664 | 264.3407664 |
| 11/22/2013 10:50 | 0 | 264.3673656 | 264.3469728 | 264.344048 | 264.347664 | 264.3367664 |
| 11/22/2013 11:00 | 0 | 264.3670608 | 264.3499728 | 264.348048 | 264.351664 | 264.3397664 |
| 11/22/2013 11:10 | 0 | 264.3670608 | 264.3489728 | 264.348048 | 264.350664 | 264.3397664 |
| 11/22/2013 11:20 | 0 | 264.366756  | 264.3469728 | 264.346048 | 264.347664 | 264.3377664 |
| 11/22/2013 11:30 | 0 | 264.366756  | 264.3469728 | 264.347048 | 264.348664 | 264.3397664 |
| 11/22/2013 11:40 | 0 | 264.3670608 | 264.3489728 | 264.347048 | 264.347664 | 264.3387664 |
| 11/22/2013 11:50 | 0 | 264.366756  | 264.3459728 | 264.347048 | 264.349664 | 264.3387664 |
| 11/22/2013 12:00 | 0 | 264.366756  | 264.3469728 | 264.349048 | 264.350664 | 264.3417664 |
| 11/22/2013 12:10 | 0 | 264.366756  | 264.3469728 | 264.347048 | 264.351664 | 264.3427664 |
| 11/22/2013 12:20 | 0 | 264.3670608 | 264.3469728 | 264.349048 | 264.351664 | 264.3407664 |
| 11/22/2013 12:30 | 0 | 264.366756  | 264.3479728 | 264.348048 | 264.350664 | 264.3397664 |
| 11/22/2013 12:40 | 0 | 264.366756  | 264.3479728 | 264.346048 | 264.350664 | 264.3407664 |
| 11/22/2013 12:50 | 0 | 264.366756  | 264.3489728 | 264.349048 | 264.352664 | 264.3437664 |

|                  |   |             |             |            |            |             |
|------------------|---|-------------|-------------|------------|------------|-------------|
| 11/22/2013 13:00 | 0 | 264.3664512 | 264.3479728 | 264.349048 | 264.351664 | 264.3407664 |
| 11/22/2013 13:10 | 0 | 264.366756  | 264.3499728 | 264.347048 | 264.349664 | 264.3407664 |
| 11/22/2013 13:20 | 0 | 264.366756  | 264.3479728 | 264.345048 | 264.349664 | 264.3397664 |
| 11/22/2013 13:30 | 0 | 264.366756  | 264.3479728 | 264.349048 | 264.351664 | 264.3407664 |
| 11/22/2013 13:40 | 0 | 264.366756  | 264.3469728 | 264.346048 | 264.348664 | 264.3397664 |
| 11/22/2013 13:50 | 0 | 264.366756  | 264.3499728 | 264.349048 | 264.351664 | 264.3407664 |
| 11/22/2013 14:00 | 0 | 264.366756  | 264.3479728 | 264.346048 | 264.351664 | 264.3407664 |
| 11/22/2013 14:10 | 0 | 264.366756  | 264.3479728 | 264.346048 | 264.351664 | 264.3407664 |
| 11/22/2013 14:20 | 0 | 264.366756  | 264.3469728 | 264.347048 | 264.346664 | 264.3397664 |
| 11/22/2013 14:30 | 0 | 264.366756  | 264.3469728 | 264.346048 | 264.349664 | 264.3407664 |
| 11/22/2013 14:40 | 0 | 264.366756  | 264.3479728 | 264.346048 | 264.350664 | 264.3427664 |
| 11/22/2013 14:50 | 0 | 264.3664512 | 264.3489728 | 264.347048 | 264.352664 | 264.3437664 |
| 11/22/2013 15:00 | 0 | 264.366756  | 264.3479728 | 264.346048 | 264.350664 | 264.3417664 |
| 11/22/2013 15:10 | 0 | 264.3670608 | 264.3489728 | 264.347048 | 264.348664 | 264.3417664 |
| 11/22/2013 15:20 | 0 | 264.3670608 | 264.3469728 | 264.349048 | 264.349664 | 264.3427664 |
| 11/22/2013 15:30 | 0 | 264.366756  | 264.3469728 | 264.348048 | 264.349664 | 264.3407664 |
| 11/22/2013 15:40 | 0 | 264.366756  | 264.3469728 | 264.348048 | 264.351664 | 264.3427664 |
| 11/22/2013 15:50 | 0 | 264.366756  | 264.3469728 | 264.348048 | 264.349664 | 264.3407664 |
| 11/22/2013 16:00 | 0 | 264.366756  | 264.3449728 | 264.348048 | 264.349664 | 264.3387664 |
| 11/22/2013 16:10 | 0 | 264.3664512 | 264.3469728 | 264.349048 | 264.349664 | 264.3427664 |
| 11/22/2013 16:20 | 0 | 264.3664512 | 264.3449728 | 264.346048 | 264.349664 | 264.3387664 |
| 11/22/2013 16:30 | 0 | 264.3664512 | 264.3489728 | 264.349048 | 264.350664 | 264.3417664 |
| 11/22/2013 16:40 | 0 | 264.3664512 | 264.3479728 | 264.346048 | 264.350664 | 264.3397664 |
| 11/22/2013 16:50 | 0 | 264.366756  | 264.3489728 | 264.348048 | 264.350664 | 264.3417664 |
| 11/22/2013 17:00 | 0 | 264.366756  | 264.3489728 | 264.348048 | 264.351664 | 264.3397664 |
| 11/22/2013 17:10 | 0 | 264.3670608 | 264.3479728 | 264.346048 | 264.348664 | 264.3397664 |
| 11/22/2013 17:20 | 0 | 264.3676704 | 264.3489728 | 264.346048 | 264.351664 | 264.3407664 |
| 11/22/2013 17:30 | 0 | 264.3679752 | 264.3509728 | 264.349048 | 264.350664 | 264.3417664 |
| 11/22/2013 17:40 | 0 | 264.3688896 | 264.3519728 | 264.349048 | 264.349664 | 264.3397664 |
| 11/22/2013 17:50 | 0 | 264.369804  | 264.3519728 | 264.352048 | 264.349664 | 264.3427664 |
| 11/22/2013 18:00 | 0 | 264.3701088 | 264.3539728 | 264.351048 | 264.347664 | 264.3427664 |
| 11/22/2013 18:10 | 0 | 264.3710232 | 264.3549728 | 264.353048 | 264.350664 | 264.3457664 |
| 11/22/2013 18:20 | 0 | 264.3716328 | 264.3529728 | 264.352048 | 264.348664 | 264.3437664 |
| 11/22/2013 18:30 | 0 | 264.3722424 | 264.3549728 | 264.353048 | 264.348664 | 264.3437664 |
| 11/22/2013 18:40 | 0 | 264.372852  | 264.3579728 | 264.355048 | 264.349664 | 264.3447664 |
| 11/22/2013 18:50 | 0 | 264.3734616 | 264.3589728 | 264.356048 | 264.349664 | 264.3457664 |
| 11/22/2013 19:00 | 0 | 264.3734616 | 264.3559728 | 264.356048 | 264.347664 | 264.3447664 |
| 11/22/2013 19:10 | 0 | 264.3740712 | 264.3559728 | 264.355048 | 264.344664 | 264.3437664 |
| 11/22/2013 19:20 | 0 | 264.3740712 | 264.3579728 | 264.357048 | 264.349664 | 264.3447664 |
| 11/22/2013 19:30 | 0 | 264.3737664 | 264.3559728 | 264.356048 | 264.348664 | 264.3437664 |
| 11/22/2013 19:40 | 0 | 264.3740712 | 264.3559728 | 264.356048 | 264.347664 | 264.3447664 |
| 11/22/2013 19:50 | 0 | 264.3737664 | 264.3539728 | 264.355048 | 264.347664 | 264.3427664 |
| 11/22/2013 20:00 | 0 | 264.3734616 | 264.3559728 | 264.356048 | 264.351664 | 264.3457664 |
| 11/22/2013 20:10 | 0 | 264.3734616 | 264.3559728 | 264.356048 | 264.349664 | 264.3457664 |
| 11/22/2013 20:20 | 0 | 264.3734616 | 264.3539728 | 264.354048 | 264.347664 | 264.3447664 |
| 11/22/2013 20:30 | 0 | 264.3731568 | 264.3549728 | 264.355048 | 264.346664 | 264.3437664 |
| 11/22/2013 20:40 | 0 | 264.372852  | 264.3559728 | 264.357048 | 264.347664 | 264.3447664 |

|                  |   |             |             |            |            |             |
|------------------|---|-------------|-------------|------------|------------|-------------|
| 11/22/2013 20:50 | 0 | 264.372852  | 264.3539728 | 264.356048 | 264.346664 | 264.3447664 |
| 11/22/2013 21:00 | 0 | 264.3725472 | 264.3529728 | 264.353048 | 264.346664 | 264.3447664 |
| 11/22/2013 21:10 | 0 | 264.3722424 | 264.3539728 | 264.356048 | 264.351664 | 264.3457664 |
| 11/22/2013 21:20 | 0 | 264.3722424 | 264.3539728 | 264.355048 | 264.347664 | 264.3467664 |
| 11/22/2013 21:30 | 0 | 264.3719376 | 264.3539728 | 264.355048 | 264.347664 | 264.3457664 |
| 11/22/2013 21:40 | 0 | 264.3716328 | 264.3529728 | 264.355048 | 264.347664 | 264.3447664 |
| 11/22/2013 21:50 | 0 | 264.371328  | 264.3519728 | 264.352048 | 264.347664 | 264.3417664 |
| 11/22/2013 22:00 | 0 | 264.3710232 | 264.3519728 | 264.353048 | 264.348664 | 264.3457664 |
| 11/22/2013 22:10 | 0 | 264.3710232 | 264.3519728 | 264.352048 | 264.350664 | 264.3457664 |
| 11/22/2013 22:20 | 0 | 264.3707184 | 264.3519728 | 264.351048 | 264.347664 | 264.3437664 |
| 11/22/2013 22:30 | 0 | 264.3704136 | 264.3519728 | 264.352048 | 264.347664 | 264.3437664 |
| 11/22/2013 22:40 | 0 | 264.3704136 | 264.3489728 | 264.349048 | 264.347664 | 264.3427664 |
| 11/22/2013 22:50 | 0 | 264.3704136 | 264.3519728 | 264.350048 | 264.349664 | 264.3457664 |
| 11/22/2013 23:00 | 0 | 264.3701088 | 264.3509728 | 264.350048 | 264.347664 | 264.3427664 |
| 11/22/2013 23:10 | 0 | 264.3701088 | 264.3519728 | 264.351048 | 264.349664 | 264.3437664 |
| 11/22/2013 23:20 | 0 | 264.3701088 | 264.3519728 | 264.352048 | 264.347664 | 264.3437664 |
| 11/22/2013 23:30 | 0 | 264.3701088 | 264.3499728 | 264.351048 | 264.346664 | 264.3437664 |
| 11/22/2013 23:40 | 0 | 264.3701088 | 264.3499728 | 264.351048 | 264.348664 | 264.3447664 |
| 11/22/2013 23:50 | 0 | 264.369804  | 264.3509728 | 264.352048 | 264.349664 | 264.3447664 |
| 11/23/2013 0:00  | 0 | 264.3701088 | 264.3509728 | 264.351048 | 264.350664 | 264.3447664 |
| 11/23/2013 0:10  | 0 | 264.3694992 | 264.3519728 | 264.352048 | 264.348664 | 264.3437664 |
| 11/23/2013 0:20  | 0 | 264.369804  | 264.3509728 | 264.349048 | 264.349664 | 264.3437664 |
| 11/23/2013 0:30  | 0 | 264.3701088 | 264.3519728 | 264.350048 | 264.347664 | 264.3437664 |
| 11/23/2013 0:40  | 0 | 264.369804  | 264.3549728 | 264.352048 | 264.348664 | 264.3437664 |
| 11/23/2013 0:50  | 0 | 264.3704136 | 264.3529728 | 264.349048 | 264.344664 | 264.3417664 |
| 11/23/2013 1:00  | 0 | 264.3704136 | 264.3529728 | 264.350048 | 264.347664 | 264.3437664 |
| 11/23/2013 1:10  | 0 | 264.3707184 | 264.3539728 | 264.352048 | 264.348664 | 264.3447664 |
| 11/23/2013 1:20  | 0 | 264.3710232 | 264.3529728 | 264.353048 | 264.349664 | 264.3437664 |
| 11/23/2013 1:30  | 0 | 264.371328  | 264.3539728 | 264.353048 | 264.347664 | 264.3437664 |
| 11/23/2013 1:40  | 0 | 264.371328  | 264.3579728 | 264.353048 | 264.349664 | 264.3457664 |
| 11/23/2013 1:50  | 0 | 264.3716328 | 264.3569728 | 264.354048 | 264.346664 | 264.3447664 |
| 11/23/2013 2:00  | 0 | 264.3719376 | 264.3569728 | 264.355048 | 264.347664 | 264.3467664 |
| 11/23/2013 2:10  | 0 | 264.3722424 | 264.3539728 | 264.353048 | 264.346664 | 264.3417664 |
| 11/23/2013 2:20  | 0 | 264.3725472 | 264.3549728 | 264.352048 | 264.345664 | 264.3427664 |
| 11/23/2013 2:30  | 0 | 264.372852  | 264.3579728 | 264.357048 | 264.348664 | 264.3467664 |
| 11/23/2013 2:40  | 0 | 264.3731568 | 264.3559728 | 264.355048 | 264.349664 | 264.3467664 |
| 11/23/2013 2:50  | 0 | 264.3734616 | 264.3589728 | 264.357048 | 264.348664 | 264.3457664 |
| 11/23/2013 3:00  | 0 | 264.3740712 | 264.3579728 | 264.355048 | 264.345664 | 264.3457664 |
| 11/23/2013 3:10  | 0 | 264.3746808 | 264.3599728 | 264.357048 | 264.348664 | 264.3477664 |
| 11/23/2013 3:20  | 0 | 264.3746808 | 264.3599728 | 264.356048 | 264.346664 | 264.3447664 |
| 11/23/2013 3:30  | 0 | 264.3749856 | 264.3619728 | 264.357048 | 264.346664 | 264.3467664 |
| 11/23/2013 3:40  | 0 | 264.3752904 | 264.3619728 | 264.357048 | 264.348664 | 264.3477664 |
| 11/23/2013 3:50  | 0 | 264.3755952 | 264.3609728 | 264.356048 | 264.347664 | 264.3477664 |
| 11/23/2013 4:00  | 0 | 264.3759    | 264.3609728 | 264.360048 | 264.347664 | 264.3487664 |
| 11/23/2013 4:10  | 0 | 264.3762048 | 264.3609728 | 264.359048 | 264.348664 | 264.3487664 |
| 11/23/2013 4:20  | 0 | 264.3762048 | 264.3599728 | 264.357048 | 264.347664 | 264.3497664 |
| 11/23/2013 4:30  | 0 | 264.3765096 | 264.3579728 | 264.356048 | 264.344664 | 264.3447664 |

|                  |   |             |             |            |            |             |
|------------------|---|-------------|-------------|------------|------------|-------------|
| 11/23/2013 4:40  | 0 | 264.3765096 | 264.3599728 | 264.359048 | 264.347664 | 264.3477664 |
| 11/23/2013 4:50  | 0 | 264.3768144 | 264.3609728 | 264.359048 | 264.346664 | 264.3477664 |
| 11/23/2013 5:00  | 0 | 264.3771192 | 264.3609728 | 264.360048 | 264.349664 | 264.3497664 |
| 11/23/2013 5:10  | 0 | 264.3768144 | 264.3589728 | 264.357048 | 264.345664 | 264.3467664 |
| 11/23/2013 5:20  | 0 | 264.3768144 | 264.3589728 | 264.357048 | 264.345664 | 264.3477664 |
| 11/23/2013 5:30  | 0 | 264.3771192 | 264.3589728 | 264.358048 | 264.346664 | 264.3477664 |
| 11/23/2013 5:40  | 0 | 264.3771192 | 264.3609728 | 264.358048 | 264.345664 | 264.3467664 |
| 11/23/2013 5:50  | 0 | 264.3768144 | 264.3599728 | 264.359048 | 264.345664 | 264.3467664 |
| 11/23/2013 6:00  | 0 | 264.3768144 | 264.3619728 | 264.358048 | 264.347664 | 264.3487664 |
| 11/23/2013 6:10  | 0 | 264.3768144 | 264.3589728 | 264.358048 | 264.346664 | 264.3477664 |
| 11/23/2013 6:20  | 0 | 264.3768144 | 264.3569728 | 264.358048 | 264.346664 | 264.3477664 |
| 11/23/2013 6:30  | 0 | 264.3768144 | 264.3589728 | 264.361048 | 264.346664 | 264.3487664 |
| 11/23/2013 6:40  | 0 | 264.3768144 | 264.3579728 | 264.358048 | 264.344664 | 264.3457664 |
| 11/23/2013 6:50  | 0 | 264.3765096 | 264.3569728 | 264.356048 | 264.346664 | 264.3477664 |
| 11/23/2013 7:00  | 0 | 264.3765096 | 264.3579728 | 264.356048 | 264.346664 | 264.3487664 |
| 11/23/2013 7:10  | 0 | 264.3765096 | 264.3569728 | 264.358048 | 264.345664 | 264.3467664 |
| 11/23/2013 7:20  | 0 | 264.3765096 | 264.3559728 | 264.356048 | 264.345664 | 264.3447664 |
| 11/23/2013 7:30  | 0 | 264.3765096 | 264.3569728 | 264.358048 | 264.343664 | 264.3467664 |
| 11/23/2013 7:40  | 0 | 264.3765096 | 264.3559728 | 264.356048 | 264.346664 | 264.3477664 |
| 11/23/2013 7:50  | 0 | 264.3759    | 264.3579728 | 264.357048 | 264.344664 | 264.3477664 |
| 11/23/2013 8:00  | 0 | 264.3759    | 264.3579728 | 264.359048 | 264.348664 | 264.3447664 |
| 11/23/2013 8:10  | 0 | 264.3759    | 264.3559728 | 264.356048 | 264.346664 | 264.3437664 |
| 11/23/2013 8:20  | 0 | 264.3755952 | 264.3579728 | 264.358048 | 264.348664 | 264.3457664 |
| 11/23/2013 8:30  | 0 | 264.3755952 | 264.3549728 | 264.356048 | 264.346664 | 264.3447664 |
| 11/23/2013 8:40  | 0 | 264.3755952 | 264.3549728 | 264.355048 | 264.346664 | 264.3447664 |
| 11/23/2013 8:50  | 0 | 264.3752904 | 264.3559728 | 264.355048 | 264.346664 | 264.3457664 |
| 11/23/2013 9:00  | 0 | 264.3752904 | 264.3539728 | 264.355048 | 264.347664 | 264.3437664 |
| 11/23/2013 9:10  | 0 | 264.3749856 | 264.3549728 | 264.355048 | 264.348664 | 264.3447664 |
| 11/23/2013 9:20  | 0 | 264.3749856 | 264.3549728 | 264.355048 | 264.348664 | 264.3477664 |
| 11/23/2013 9:30  | 0 | 264.3749856 | 264.3549728 | 264.355048 | 264.346664 | 264.3467664 |
| 11/23/2013 9:40  | 0 | 264.3746808 | 264.3559728 | 264.354048 | 264.346664 | 264.3477664 |
| 11/23/2013 9:50  | 0 | 264.3746808 | 264.3529728 | 264.354048 | 264.346664 | 264.3467664 |
| 11/23/2013 10:00 | 0 | 264.3740712 | 264.3539728 | 264.352048 | 264.345664 | 264.3457664 |
| 11/23/2013 10:10 | 0 | 264.374376  | 264.3559728 | 264.354048 | 264.345664 | 264.3427664 |
| 11/23/2013 10:20 | 0 | 264.3740712 | 264.3539728 | 264.354048 | 264.347664 | 264.3457664 |
| 11/23/2013 10:30 | 0 | 264.3740712 | 264.3529728 | 264.354048 | 264.342664 | 264.3447664 |
| 11/23/2013 10:40 | 0 | 264.3737664 | 264.3559728 | 264.356048 | 264.349664 | 264.3457664 |
| 11/23/2013 10:50 | 0 | 264.3737664 | 264.3549728 | 264.353048 | 264.346664 | 264.3447664 |
| 11/23/2013 11:00 | 0 | 264.3737664 | 264.3529728 | 264.353048 | 264.346664 | 264.3447664 |
| 11/23/2013 11:10 | 0 | 264.3737664 | 264.3559728 | 264.353048 | 264.348664 | 264.3447664 |
| 11/23/2013 11:20 | 0 | 264.3734616 | 264.3529728 | 264.353048 | 264.345664 | 264.3457664 |
| 11/23/2013 11:30 | 0 | 264.3734616 | 264.3539728 | 264.354048 | 264.345664 | 264.3437664 |
| 11/23/2013 11:40 | 0 | 264.3731568 | 264.3549728 | 264.354048 | 264.347664 | 264.3467664 |
| 11/23/2013 11:50 | 0 | 264.372852  | 264.3539728 | 264.353048 | 264.344664 | 264.3417664 |
| 11/23/2013 12:00 | 0 | 264.372852  | 264.3559728 | 264.353048 | 264.346664 | 264.3447664 |
| 11/23/2013 12:10 | 0 | 264.3725472 | 264.3529728 | 264.352048 | 264.344664 | 264.3447664 |
| 11/23/2013 12:20 | 0 | 264.372852  | 264.3539728 | 264.354048 | 264.346664 | 264.3447664 |

|                  |   |             |             |            |            |             |
|------------------|---|-------------|-------------|------------|------------|-------------|
| 11/23/2013 12:30 | 0 | 264.3725472 | 264.3539728 | 264.355048 | 264.348664 | 264.3447664 |
| 11/23/2013 12:40 | 0 | 264.3722424 | 264.3539728 | 264.355048 | 264.347664 | 264.3437664 |
| 11/23/2013 12:50 | 0 | 264.3719376 | 264.3509728 | 264.354048 | 264.346664 | 264.3447664 |
| 11/23/2013 13:00 | 0 | 264.3719376 | 264.3529728 | 264.351048 | 264.347664 | 264.3437664 |
| 11/23/2013 13:10 | 0 | 264.3719376 | 264.3539728 | 264.354048 | 264.349664 | 264.3437664 |
| 11/23/2013 13:20 | 0 | 264.3716328 | 264.3509728 | 264.354048 | 264.348664 | 264.3447664 |
| 11/23/2013 13:30 | 0 | 264.3716328 | 264.3509728 | 264.354048 | 264.346664 | 264.3437664 |
| 11/23/2013 13:40 | 0 | 264.371328  | 264.3489728 | 264.351048 | 264.347664 | 264.3437664 |
| 11/23/2013 13:50 | 0 | 264.371328  | 264.3509728 | 264.351048 | 264.345664 | 264.3437664 |
| 11/23/2013 14:00 | 0 | 264.3710232 | 264.3509728 | 264.351048 | 264.345664 | 264.3457664 |
| 11/23/2013 14:10 | 0 | 264.3710232 | 264.3539728 | 264.351048 | 264.345664 | 264.3437664 |
| 11/23/2013 14:20 | 0 | 264.371328  | 264.3489728 | 264.350048 | 264.345664 | 264.3427664 |
| 11/23/2013 14:30 | 0 | 264.3710232 | 264.3519728 | 264.350048 | 264.345664 | 264.3427664 |
| 11/23/2013 14:40 | 0 | 264.3707184 | 264.3509728 | 264.350048 | 264.345664 | 264.3437664 |
| 11/23/2013 14:50 | 0 | 264.3710232 | 264.3509728 | 264.351048 | 264.345664 | 264.3417664 |
| 11/23/2013 15:00 | 0 | 264.3704136 | 264.3519728 | 264.351048 | 264.345664 | 264.3437664 |
| 11/23/2013 15:10 | 0 | 264.3707184 | 264.3519728 | 264.351048 | 264.344664 | 264.3437664 |
| 11/23/2013 15:20 | 0 | 264.3704136 | 264.3509728 | 264.351048 | 264.345664 | 264.3437664 |
| 11/23/2013 15:30 | 0 | 264.3701088 | 264.3519728 | 264.350048 | 264.345664 | 264.3437664 |
| 11/23/2013 15:40 | 0 | 264.3701088 | 264.3509728 | 264.349048 | 264.345664 | 264.3427664 |
| 11/23/2013 15:50 | 0 | 264.369804  | 264.3489728 | 264.348048 | 264.343664 | 264.3437664 |
| 11/23/2013 16:00 | 0 | 264.369804  | 264.3519728 | 264.350048 | 264.347664 | 264.3437664 |
| 11/23/2013 16:10 | 0 | 264.369804  | 264.3509728 | 264.350048 | 264.344664 | 264.3427664 |
| 11/23/2013 16:20 | 0 | 264.3694992 | 264.3509728 | 264.350048 | 264.345664 | 264.3437664 |
| 11/23/2013 16:30 | 0 | 264.369804  | 264.3519728 | 264.350048 | 264.345664 | 264.3437664 |
| 11/23/2013 16:40 | 0 | 264.3694992 | 264.3519728 | 264.351048 | 264.347664 | 264.3437664 |
| 11/23/2013 16:50 | 0 | 264.3694992 | 264.3519728 | 264.350048 | 264.347664 | 264.3437664 |
| 11/23/2013 17:00 | 0 | 264.3691944 | 264.3489728 | 264.348048 | 264.346664 | 264.3427664 |
| 11/23/2013 17:10 | 0 | 264.3691944 | 264.3489728 | 264.349048 | 264.345664 | 264.3427664 |
| 11/23/2013 17:20 | 0 | 264.3691944 | 264.3489728 | 264.350048 | 264.345664 | 264.3437664 |
| 11/23/2013 17:30 | 0 | 264.3691944 | 264.3509728 | 264.351048 | 264.347664 | 264.3437664 |
| 11/23/2013 17:40 | 0 | 264.3691944 | 264.3489728 | 264.350048 | 264.347664 | 264.3417664 |
| 11/23/2013 17:50 | 0 | 264.3691944 | 264.3499728 | 264.350048 | 264.346664 | 264.3417664 |
| 11/23/2013 18:00 | 0 | 264.3688896 | 264.3499728 | 264.349048 | 264.344664 | 264.3397664 |
| 11/23/2013 18:10 | 0 | 264.3688896 | 264.3499728 | 264.350048 | 264.346664 | 264.3427664 |
| 11/23/2013 18:20 | 0 | 264.3688896 | 264.3469728 | 264.347048 | 264.343664 | 264.3417664 |
| 11/23/2013 18:30 | 0 | 264.3685848 | 264.3499728 | 264.350048 | 264.346664 | 264.3427664 |
| 11/23/2013 18:40 | 0 | 264.3685848 | 264.3489728 | 264.349048 | 264.346664 | 264.3437664 |
| 11/23/2013 18:50 | 0 | 264.3685848 | 264.3499728 | 264.350048 | 264.346664 | 264.3407664 |
| 11/23/2013 19:00 | 0 | 264.3685848 | 264.3509728 | 264.350048 | 264.345664 | 264.3427664 |
| 11/23/2013 19:10 | 0 | 264.36828   | 264.3479728 | 264.349048 | 264.344664 | 264.3407664 |
| 11/23/2013 19:20 | 0 | 264.36828   | 264.3499728 | 264.347048 | 264.347664 | 264.3407664 |
| 11/23/2013 19:30 | 0 | 264.36828   | 264.3499728 | 264.348048 | 264.346664 | 264.3407664 |
| 11/23/2013 19:40 | 0 | 264.3679752 | 264.3509728 | 264.350048 | 264.346664 | 264.3457664 |
| 11/23/2013 19:50 | 0 | 264.36828   | 264.3509728 | 264.350048 | 264.347664 | 264.3407664 |
| 11/23/2013 20:00 | 0 | 264.36828   | 264.3509728 | 264.351048 | 264.348664 | 264.3437664 |
| 11/23/2013 20:10 | 0 | 264.3679752 | 264.3479728 | 264.350048 | 264.343664 | 264.3417664 |

|                  |   |             |             |            |            |             |
|------------------|---|-------------|-------------|------------|------------|-------------|
| 11/23/2013 20:20 | 0 | 264.3673656 | 264.3459728 | 264.347048 | 264.342664 | 264.3387664 |
| 11/23/2013 20:30 | 0 | 264.3670608 | 264.3479728 | 264.347048 | 264.344664 | 264.3387664 |
| 11/23/2013 20:40 | 0 | 264.3670608 | 264.3479728 | 264.347048 | 264.344664 | 264.3387664 |
| 11/23/2013 20:50 | 0 | 264.3673656 | 264.3489728 | 264.348048 | 264.344664 | 264.3417664 |
| 11/23/2013 21:00 | 0 | 264.3676704 | 264.3489728 | 264.348048 | 264.345664 | 264.3417664 |
| 11/23/2013 21:10 | 0 | 264.3673656 | 264.3479728 | 264.348048 | 264.344664 | 264.3407664 |
| 11/23/2013 21:20 | 0 | 264.3673656 | 264.3479728 | 264.348048 | 264.345664 | 264.3407664 |
| 11/23/2013 21:30 | 0 | 264.3676704 | 264.3479728 | 264.345048 | 264.344664 | 264.3387664 |
| 11/23/2013 21:40 | 0 | 264.3673656 | 264.3479728 | 264.347048 | 264.345664 | 264.3407664 |
| 11/23/2013 21:50 | 0 | 264.3673656 | 264.3479728 | 264.345048 | 264.344664 | 264.3407664 |
| 11/23/2013 22:00 | 0 | 264.3673656 | 264.3479728 | 264.347048 | 264.344664 | 264.3407664 |
| 11/23/2013 22:10 | 0 | 264.3670608 | 264.3489728 | 264.348048 | 264.345664 | 264.3407664 |
| 11/23/2013 22:20 | 0 | 264.3676704 | 264.3479728 | 264.347048 | 264.344664 | 264.3387664 |
| 11/23/2013 22:30 | 0 | 264.3673656 | 264.3489728 | 264.348048 | 264.344664 | 264.3407664 |
| 11/23/2013 22:40 | 0 | 264.3670608 | 264.3499728 | 264.347048 | 264.346664 | 264.3407664 |
| 11/23/2013 22:50 | 0 | 264.3673656 | 264.3469728 | 264.345048 | 264.342664 | 264.3397664 |
| 11/23/2013 23:00 | 0 | 264.3670608 | 264.3459728 | 264.348048 | 264.343664 | 264.3397664 |
| 11/23/2013 23:10 | 0 | 264.3670608 | 264.3469728 | 264.347048 | 264.343664 | 264.3397664 |
| 11/23/2013 23:20 | 0 | 264.366756  | 264.3489728 | 264.348048 | 264.344664 | 264.3407664 |
| 11/23/2013 23:30 | 0 | 264.366756  | 264.3469728 | 264.347048 | 264.344664 | 264.3417664 |
| 11/23/2013 23:40 | 0 | 264.3670608 | 264.3479728 | 264.348048 | 264.346664 | 264.3407664 |
| 11/23/2013 23:50 | 0 | 264.366756  | 264.3469728 | 264.347048 | 264.344664 | 264.3407664 |
| 11/24/2013 0:00  | 0 | 264.366756  | 264.3499728 | 264.350048 | 264.347664 | 264.3417664 |
| 11/24/2013 0:10  | 0 | 264.366756  | 264.3499728 | 264.348048 | 264.345664 | 264.3417664 |
| 11/24/2013 0:20  | 0 | 264.366756  | 264.3499728 | 264.348048 | 264.345664 | 264.3417664 |
| 11/24/2013 0:30  | 0 | 264.3664512 | 264.3479728 | 264.347048 | 264.342664 | 264.3407664 |
| 11/24/2013 0:40  | 0 | 264.3664512 | 264.3479728 | 264.349048 | 264.345664 | 264.3417664 |
| 11/24/2013 0:50  | 0 | 264.3664512 | 264.3429728 | 264.344048 | 264.342664 | 264.3387664 |
| 11/24/2013 1:00  | 0 | 264.3664512 | 264.3479728 | 264.347048 | 264.347664 | 264.3417664 |
| 11/24/2013 1:10  | 0 | 264.3664512 | 264.3469728 | 264.344048 | 264.343664 | 264.3407664 |
| 11/24/2013 1:20  | 0 | 264.3664512 | 264.3469728 | 264.344048 | 264.343664 | 264.3407664 |
| 11/24/2013 1:30  | 0 | 264.3661464 | 264.3479728 | 264.347048 | 264.346664 | 264.3397664 |
| 11/24/2013 1:40  | 0 | 264.3661464 | 264.3459728 | 264.347048 | 264.345664 | 264.3397664 |
| 11/24/2013 1:50  | 0 | 264.3661464 | 264.3459728 | 264.344048 | 264.344664 | 264.3407664 |
| 11/24/2013 2:00  | 0 | 264.3661464 | 264.3449728 | 264.346048 | 264.343664 | 264.3407664 |
| 11/24/2013 2:10  | 0 | 264.3664512 | 264.3449728 | 264.345048 | 264.343664 | 264.3387664 |
| 11/24/2013 2:20  | 0 | 264.3661464 | 264.3469728 | 264.346048 | 264.344664 | 264.3397664 |
| 11/24/2013 2:30  | 0 | 264.3661464 | 264.3429728 | 264.343048 | 264.345664 | 264.3387664 |
| 11/24/2013 2:40  | 0 | 264.3661464 | 264.3469728 | 264.345048 | 264.344664 | 264.3397664 |
| 11/24/2013 2:50  | 0 | 264.3658416 | 264.3429728 | 264.343048 | 264.339664 | 264.3387664 |
| 11/24/2013 3:00  | 0 | 264.3658416 | 264.3449728 | 264.345048 | 264.341664 | 264.3387664 |
| 11/24/2013 3:10  | 0 | 264.3658416 | 264.3469728 | 264.346048 | 264.346664 | 264.3397664 |
| 11/24/2013 3:20  | 0 | 264.3658416 | 264.3429728 | 264.343048 | 264.343664 | 264.3367664 |
| 11/24/2013 3:30  | 0 | 264.3658416 | 264.3429728 | 264.343048 | 264.343664 | 264.3387664 |
| 11/24/2013 3:40  | 0 | 264.3661464 | 264.3419728 | 264.343048 | 264.341664 | 264.3387664 |
| 11/24/2013 3:50  | 0 | 264.3655368 | 264.3429728 | 264.342048 | 264.341664 | 264.3367664 |
| 11/24/2013 4:00  | 0 | 264.3658416 | 264.3419728 | 264.342048 | 264.338664 | 264.3367664 |

|                  |   |             |             |            |            |             |
|------------------|---|-------------|-------------|------------|------------|-------------|
| 11/24/2013 4:10  | 0 | 264.3655368 | 264.3429728 | 264.342048 | 264.343664 | 264.3367664 |
| 11/24/2013 4:20  | 0 | 264.3655368 | 264.3429728 | 264.343048 | 264.343664 | 264.3367664 |
| 11/24/2013 4:30  | 0 | 264.3655368 | 264.3409728 | 264.342048 | 264.344664 | 264.3377664 |
| 11/24/2013 4:40  | 0 | 264.3655368 | 264.3449728 | 264.343048 | 264.341664 | 264.3377664 |
| 11/24/2013 4:50  | 0 | 264.3655368 | 264.3429728 | 264.342048 | 264.344664 | 264.3377664 |
| 11/24/2013 5:00  | 0 | 264.3655368 | 264.3419728 | 264.342048 | 264.341664 | 264.3367664 |
| 11/24/2013 5:10  | 0 | 264.3655368 | 264.3419728 | 264.341048 | 264.342664 | 264.3367664 |
| 11/24/2013 5:20  | 0 | 264.365232  | 264.3439728 | 264.342048 | 264.341664 | 264.3367664 |
| 11/24/2013 5:30  | 0 | 264.365232  | 264.3449728 | 264.344048 | 264.342664 | 264.3387664 |
| 11/24/2013 5:40  | 0 | 264.3655368 | 264.3449728 | 264.341048 | 264.342664 | 264.3387664 |
| 11/24/2013 5:50  | 0 | 264.365232  | 264.3419728 | 264.341048 | 264.341664 | 264.3387664 |
| 11/24/2013 6:00  | 0 | 264.365232  | 264.3429728 | 264.344048 | 264.342664 | 264.3387664 |
| 11/24/2013 6:10  | 0 | 264.365232  | 264.3449728 | 264.341048 | 264.342664 | 264.3377664 |
| 11/24/2013 6:20  | 0 | 264.365232  | 264.3429728 | 264.342048 | 264.341664 | 264.3387664 |
| 11/24/2013 6:30  | 0 | 264.365232  | 264.3409728 | 264.340048 | 264.341664 | 264.3367664 |
| 11/24/2013 6:40  | 0 | 264.365232  | 264.3439728 | 264.343048 | 264.344664 | 264.3397664 |
| 11/24/2013 6:50  | 0 | 264.365232  | 264.3449728 | 264.343048 | 264.343664 | 264.3397664 |
| 11/24/2013 7:00  | 0 | 264.365232  | 264.3419728 | 264.340048 | 264.341664 | 264.3387664 |
| 11/24/2013 7:10  | 0 | 264.365232  | 264.3439728 | 264.341048 | 264.343664 | 264.3387664 |
| 11/24/2013 7:20  | 0 | 264.365232  | 264.3439728 | 264.341048 | 264.344664 | 264.3387664 |
| 11/24/2013 7:30  | 0 | 264.365232  | 264.3439728 | 264.342048 | 264.344664 | 264.3387664 |
| 11/24/2013 7:40  | 0 | 264.365232  | 264.3439728 | 264.342048 | 264.343664 | 264.3367664 |
| 11/24/2013 7:50  | 0 | 264.365232  | 264.3409728 | 264.342048 | 264.341664 | 264.3347664 |
| 11/24/2013 8:00  | 0 | 264.365232  | 264.3419728 | 264.341048 | 264.340664 | 264.3367664 |
| 11/24/2013 8:10  | 0 | 264.3649272 | 264.3419728 | 264.341048 | 264.340664 | 264.3367664 |
| 11/24/2013 8:20  | 0 | 264.365232  | 264.3419728 | 264.341048 | 264.340664 | 264.3367664 |
| 11/24/2013 8:30  | 0 | 264.3649272 | 264.3419728 | 264.341048 | 264.342664 | 264.3377664 |
| 11/24/2013 8:40  | 0 | 264.3649272 | 264.3449728 | 264.343048 | 264.344664 | 264.3377664 |
| 11/24/2013 8:50  | 0 | 264.3649272 | 264.3429728 | 264.343048 | 264.341664 | 264.3377664 |
| 11/24/2013 9:00  | 0 | 264.3649272 | 264.3429728 | 264.343048 | 264.342664 | 264.3377664 |
| 11/24/2013 9:10  | 0 | 264.3649272 | 264.3429728 | 264.343048 | 264.341664 | 264.3377664 |
| 11/24/2013 9:20  | 0 | 264.3646224 | 264.3429728 | 264.341048 | 264.341664 | 264.3387664 |
| 11/24/2013 9:30  | 0 | 264.3646224 | 264.3429728 | 264.343048 | 264.341664 | 264.3387664 |
| 11/24/2013 9:40  | 0 | 264.3646224 | 264.3409728 | 264.341048 | 264.341664 | 264.3367664 |
| 11/24/2013 9:50  | 0 | 264.3646224 | 264.3439728 | 264.343048 | 264.342664 | 264.3367664 |
| 11/24/2013 10:00 | 0 | 264.3646224 | 264.3429728 | 264.340048 | 264.342664 | 264.3367664 |
| 11/24/2013 10:10 | 0 | 264.3646224 | 264.3419728 | 264.342048 | 264.340664 | 264.3347664 |
| 11/24/2013 10:20 | 0 | 264.3646224 | 264.3439728 | 264.340048 | 264.341664 | 264.3357664 |
| 11/24/2013 10:30 | 0 | 264.3649272 | 264.3429728 | 264.343048 | 264.344664 | 264.3357664 |
| 11/24/2013 10:40 | 0 | 264.3646224 | 264.3419728 | 264.340048 | 264.341664 | 264.3377664 |
| 11/24/2013 10:50 | 0 | 264.3640128 | 264.3449728 | 264.342048 | 264.344664 | 264.3367664 |
| 11/24/2013 11:00 | 0 | 264.3646224 | 264.3419728 | 264.339048 | 264.339664 | 264.3357664 |
| 11/24/2013 11:10 | 0 | 264.3646224 | 264.3449728 | 264.342048 | 264.344664 | 264.3367664 |
| 11/24/2013 11:20 | 0 | 264.3646224 | 264.3429728 | 264.342048 | 264.342664 | 264.3347664 |
| 11/24/2013 11:30 | 0 | 264.3643176 | 264.3419728 | 264.341048 | 264.341664 | 264.3357664 |
| 11/24/2013 11:40 | 0 | 264.3643176 | 264.3419728 | 264.341048 | 264.341664 | 264.3377664 |
| 11/24/2013 11:50 | 0 | 264.3643176 | 264.3399728 | 264.342048 | 264.343664 | 264.3367664 |

|                  |   |             |             |            |            |             |
|------------------|---|-------------|-------------|------------|------------|-------------|
| 11/24/2013 12:00 | 0 | 264.3643176 | 264.3419728 | 264.342048 | 264.344664 | 264.3367664 |
| 11/24/2013 12:10 | 0 | 264.3646224 | 264.3419728 | 264.340048 | 264.342664 | 264.3367664 |
| 11/24/2013 12:20 | 0 | 264.3643176 | 264.3419728 | 264.341048 | 264.343664 | 264.3367664 |
| 11/24/2013 12:30 | 0 | 264.3643176 | 264.3409728 | 264.341048 | 264.344664 | 264.3357664 |
| 11/24/2013 12:40 | 0 | 264.3643176 | 264.3409728 | 264.340048 | 264.343664 | 264.3367664 |
| 11/24/2013 12:50 | 0 | 264.3643176 | 264.3409728 | 264.339048 | 264.341664 | 264.3367664 |
| 11/24/2013 13:00 | 0 | 264.3646224 | 264.3429728 | 264.342048 | 264.341664 | 264.3367664 |
| 11/24/2013 13:10 | 0 | 264.3646224 | 264.3449728 | 264.343048 | 264.342664 | 264.3367664 |
| 11/24/2013 13:20 | 0 | 264.3640128 | 264.3439728 | 264.342048 | 264.342664 | 264.3357664 |
| 11/24/2013 13:30 | 0 | 264.3646224 | 264.3449728 | 264.343048 | 264.341664 | 264.3387664 |
| 11/24/2013 13:40 | 0 | 264.3634032 | 264.3449728 | 264.343048 | 264.341664 | 264.3387664 |
| 11/24/2013 13:50 | 0 | 264.3640128 | 264.3439728 | 264.342048 | 264.342664 | 264.3377664 |
| 11/24/2013 14:00 | 0 | 264.3640128 | 264.3439728 | 264.341048 | 264.341664 | 264.3367664 |
| 11/24/2013 14:10 | 0 | 264.363708  | 264.3459728 | 264.345048 | 264.345664 | 264.3407664 |
| 11/24/2013 14:20 | 0 | 264.3640128 | 264.3439728 | 264.344048 | 264.339664 | 264.3377664 |
| 11/24/2013 14:30 | 0 | 264.3643176 | 264.3419728 | 264.341048 | 264.339664 | 264.3357664 |
| 11/24/2013 14:40 | 0 | 264.363708  | 264.3429728 | 264.343048 | 264.340664 | 264.3367664 |
| 11/24/2013 14:50 | 0 | 264.3640128 | 264.3449728 | 264.344048 | 264.341664 | 264.3377664 |
| 11/24/2013 15:00 | 0 | 264.363708  | 264.3429728 | 264.343048 | 264.341664 | 264.3357664 |
| 11/24/2013 15:10 | 0 | 264.3640128 | 264.3419728 | 264.343048 | 264.340664 | 264.3367664 |
| 11/24/2013 15:20 | 0 | 264.3643176 | 264.3439728 | 264.343048 | 264.343664 | 264.3367664 |
| 11/24/2013 15:30 | 0 | 264.3634032 | 264.3419728 | 264.343048 | 264.343664 | 264.3377664 |
| 11/24/2013 15:40 | 0 | 264.3630984 | 264.3439728 | 264.342048 | 264.342664 | 264.3367664 |
| 11/24/2013 15:50 | 0 | 264.3634032 | 264.3419728 | 264.342048 | 264.341664 | 264.3377664 |
| 11/24/2013 16:00 | 0 | 264.3630984 | 264.3449728 | 264.345048 | 264.343664 | 264.3377664 |
| 11/24/2013 16:10 | 0 | 264.3630984 | 264.3419728 | 264.341048 | 264.340664 | 264.3337664 |
| 11/24/2013 16:20 | 0 | 264.3630984 | 264.3429728 | 264.343048 | 264.340664 | 264.3357664 |
| 11/24/2013 16:30 | 0 | 264.3627936 | 264.3449728 | 264.345048 | 264.342664 | 264.3387664 |
| 11/24/2013 16:40 | 0 | 264.3630984 | 264.3429728 | 264.345048 | 264.343664 | 264.3387664 |
| 11/24/2013 16:50 | 0 | 264.3630984 | 264.3409728 | 264.341048 | 264.340664 | 264.3357664 |
| 11/24/2013 17:00 | 0 | 264.3630984 | 264.3439728 | 264.344048 | 264.342664 | 264.3377664 |
| 11/24/2013 17:10 | 0 | 264.3627936 | 264.3419728 | 264.342048 | 264.342664 | 264.3387664 |
| 11/24/2013 17:20 | 0 | 264.3627936 | 264.3419728 | 264.344048 | 264.341664 | 264.3387664 |
| 11/24/2013 17:30 | 0 | 264.3627936 | 264.3419728 | 264.342048 | 264.343664 | 264.3367664 |
| 11/24/2013 17:40 | 0 | 264.3630984 | 264.3429728 | 264.342048 | 264.341664 | 264.3367664 |
| 11/24/2013 17:50 | 0 | 264.3630984 | 264.3429728 | 264.342048 | 264.342664 | 264.3377664 |
| 11/24/2013 18:00 | 0 | 264.3627936 | 264.3409728 | 264.341048 | 264.342664 | 264.3367664 |
| 11/24/2013 18:10 | 0 | 264.3627936 | 264.3429728 | 264.343048 | 264.344664 | 264.3377664 |
| 11/24/2013 18:20 | 0 | 264.3627936 | 264.3449728 | 264.344048 | 264.343664 | 264.3407664 |
| 11/24/2013 18:30 | 0 | 264.3624888 | 264.3409728 | 264.341048 | 264.340664 | 264.3357664 |
| 11/24/2013 18:40 | 0 | 264.3624888 | 264.3409728 | 264.341048 | 264.342664 | 264.3357664 |
| 11/24/2013 18:50 | 0 | 264.3624888 | 264.3439728 | 264.341048 | 264.341664 | 264.3357664 |
| 11/24/2013 19:00 | 0 | 264.3624888 | 264.3409728 | 264.341048 | 264.338664 | 264.3357664 |
| 11/24/2013 19:10 | 0 | 264.3627936 | 264.3419728 | 264.341048 | 264.341664 | 264.3367664 |
| 11/24/2013 19:20 | 0 | 264.3627936 | 264.3419728 | 264.341048 | 264.340664 | 264.3357664 |
| 11/24/2013 19:30 | 0 | 264.3627936 | 264.3419728 | 264.341048 | 264.341664 | 264.3367664 |
| 11/24/2013 19:40 | 0 | 264.3627936 | 264.3439728 | 264.343048 | 264.341664 | 264.3367664 |



|                  |   |             |             |            |            |             |
|------------------|---|-------------|-------------|------------|------------|-------------|
| 11/24/2013 19:50 | 0 | 264.3627936 | 264.3419728 | 264.341048 | 264.340664 | 264.3367664 |
| 11/24/2013 20:00 | 0 | 264.3627936 | 264.3409728 | 264.342048 | 264.340664 | 264.3357664 |
| 11/24/2013 20:10 | 0 | 264.3624888 | 264.3429728 | 264.342048 | 264.338664 | 264.3357664 |
| 11/24/2013 20:20 | 0 | 264.362184  | 264.3429728 | 264.343048 | 264.341664 | 264.3367664 |
| 11/24/2013 20:30 | 0 | 264.3624888 | 264.3429728 | 264.342048 | 264.339664 | 264.3357664 |
| 11/24/2013 20:40 | 0 | 264.3624888 | 264.3419728 | 264.343048 | 264.341664 | 264.3367664 |
| 11/24/2013 20:50 | 0 | 264.362184  | 264.3419728 | 264.342048 | 264.342664 | 264.3367664 |
| 11/24/2013 21:00 | 0 | 264.3624888 | 264.3419728 | 264.342048 | 264.342664 | 264.3367664 |
| 11/24/2013 21:10 | 0 | 264.362184  | 264.3419728 | 264.341048 | 264.338664 | 264.3367664 |
| 11/24/2013 21:20 | 0 | 264.3627936 | 264.3409728 | 264.339048 | 264.339664 | 264.3357664 |
| 11/24/2013 21:30 | 0 | 264.3624888 | 264.3399728 | 264.342048 | 264.339664 | 264.3337664 |
| 11/24/2013 21:40 | 0 | 264.362184  | 264.3439728 | 264.344048 | 264.340664 | 264.3367664 |
| 11/24/2013 21:50 | 0 | 264.3624888 | 264.3439728 | 264.344048 | 264.340664 | 264.3367664 |
| 11/24/2013 22:00 | 0 | 264.362184  | 264.3429728 | 264.342048 | 264.341664 | 264.3397664 |
| 11/24/2013 22:10 | 0 | 264.3624888 | 264.3419728 | 264.342048 | 264.339664 | 264.3347664 |
| 11/24/2013 22:20 | 0 | 264.362184  | 264.3419728 | 264.342048 | 264.341664 | 264.3377664 |
| 11/24/2013 22:30 | 0 | 264.3624888 | 264.3419728 | 264.342048 | 264.339664 | 264.3357664 |
| 11/24/2013 22:40 | 0 | 264.3624888 | 264.3429728 | 264.342048 | 264.338664 | 264.3357664 |
| 11/24/2013 22:50 | 0 | 264.3624888 | 264.3429728 | 264.344048 | 264.340664 | 264.3367664 |
| 11/24/2013 23:00 | 0 | 264.362184  | 264.3429728 | 264.341048 | 264.338664 | 264.3347664 |
| 11/24/2013 23:10 | 0 | 264.362184  | 264.3439728 | 264.341048 | 264.341664 | 264.3367664 |
| 11/24/2013 23:20 | 0 | 264.362184  | 264.3419728 | 264.341048 | 264.338664 | 264.3357664 |
| 11/24/2013 23:30 | 0 | 264.3624888 | 264.3409728 | 264.341048 | 264.337664 | 264.3357664 |
| 11/24/2013 23:40 | 0 | 264.362184  | 264.3429728 | 264.341048 | 264.338664 | 264.3337664 |
| 11/24/2013 23:50 | 0 | 264.362184  | 264.3399728 | 264.341048 | 264.338664 | 264.3337664 |
| 11/25/2013 0:00  | 0 | 264.362184  | 264.3429728 | 264.344048 | 264.340664 | 264.3347664 |
| 11/25/2013 0:10  | 0 | 264.3624888 | 264.3429728 | 264.341048 | 264.339664 | 264.3347664 |
| 11/25/2013 0:20  | 0 | 264.362184  | 264.3439728 | 264.341048 | 264.340664 | 264.3357664 |
| 11/25/2013 0:30  | 0 | 264.362184  | 264.3409728 | 264.344048 | 264.341664 | 264.3357664 |
| 11/25/2013 0:40  | 0 | 264.3618792 | 264.3419728 | 264.343048 | 264.341664 | 264.3357664 |
| 11/25/2013 0:50  | 0 | 264.362184  | 264.3389728 | 264.343048 | 264.339664 | 264.3337664 |
| 11/25/2013 1:00  | 0 | 264.3618792 | 264.3429728 | 264.341048 | 264.339664 | 264.3347664 |
| 11/25/2013 1:10  | 0 | 264.3618792 | 264.3419728 | 264.343048 | 264.338664 | 264.3367664 |
| 11/25/2013 1:20  | 0 | 264.3618792 | 264.3389728 | 264.340048 | 264.337664 | 264.3327664 |
| 11/25/2013 1:30  | 0 | 264.3618792 | 264.3399728 | 264.340048 | 264.340664 | 264.3337664 |
| 11/25/2013 1:40  | 0 | 264.3618792 | 264.3389728 | 264.340048 | 264.338664 | 264.3337664 |
| 11/25/2013 1:50  | 0 | 264.3618792 | 264.3419728 | 264.342048 | 264.340664 | 264.3337664 |
| 11/25/2013 2:00  | 0 | 264.3618792 | 264.3419728 | 264.340048 | 264.339664 | 264.3327664 |
| 11/25/2013 2:10  | 0 | 264.3618792 | 264.3429728 | 264.343048 | 264.342664 | 264.3357664 |
| 11/25/2013 2:20  | 0 | 264.3615744 | 264.3409728 | 264.342048 | 264.340664 | 264.3337664 |
| 11/25/2013 2:30  | 0 | 264.3618792 | 264.3399728 | 264.340048 | 264.340664 | 264.3337664 |
| 11/25/2013 2:40  | 0 | 264.3627936 | 264.3399728 | 264.342048 | 264.339664 | 264.3347664 |
| 11/25/2013 2:50  | 0 | 264.3630984 | 264.3399728 | 264.340048 | 264.339664 | 264.3327664 |
| 11/25/2013 3:00  | 0 | 264.3634032 | 264.3409728 | 264.342048 | 264.338664 | 264.3357664 |
| 11/25/2013 3:10  | 0 | 264.3630984 | 264.3429728 | 264.342048 | 264.339664 | 264.3347664 |
| 11/25/2013 3:20  | 0 | 264.3627936 | 264.3419728 | 264.341048 | 264.338664 | 264.3367664 |
| 11/25/2013 3:30  | 0 | 264.3627936 | 264.3419728 | 264.342048 | 264.339664 | 264.3367664 |

|                  |   |             |             |            |            |             |
|------------------|---|-------------|-------------|------------|------------|-------------|
| 11/25/2013 3:40  | 0 | 264.3624888 | 264.3439728 | 264.342048 | 264.341664 | 264.3367664 |
| 11/25/2013 3:50  | 0 | 264.3618792 | 264.3429728 | 264.343048 | 264.339664 | 264.3377664 |
| 11/25/2013 4:00  | 0 | 264.362184  | 264.3429728 | 264.342048 | 264.342664 | 264.3377664 |
| 11/25/2013 4:10  | 0 | 264.362184  | 264.3439728 | 264.342048 | 264.341664 | 264.3367664 |
| 11/25/2013 4:20  | 0 | 264.362184  | 264.3449728 | 264.345048 | 264.342664 | 264.3377664 |
| 11/25/2013 4:30  | 0 | 264.362184  | 264.3439728 | 264.343048 | 264.340664 | 264.3357664 |
| 11/25/2013 4:40  | 0 | 264.3612696 | 264.3449728 | 264.343048 | 264.339664 | 264.3367664 |
| 11/25/2013 4:50  | 0 | 264.362184  | 264.3429728 | 264.343048 | 264.339664 | 264.3337664 |
| 11/25/2013 5:00  | 0 | 264.3624888 | 264.3459728 | 264.344048 | 264.340664 | 264.3357664 |
| 11/25/2013 5:10  | 0 | 264.362184  | 264.3459728 | 264.344048 | 264.340664 | 264.3357664 |
| 11/25/2013 5:20  | 0 | 264.3624888 | 264.3439728 | 264.343048 | 264.338664 | 264.3357664 |
| 11/25/2013 5:30  | 0 | 264.362184  | 264.3439728 | 264.343048 | 264.341664 | 264.3357664 |
| 11/25/2013 5:40  | 0 | 264.362184  | 264.3459728 | 264.343048 | 264.340664 | 264.3357664 |
| 11/25/2013 5:50  | 0 | 264.362184  | 264.3449728 | 264.343048 | 264.339664 | 264.3367664 |
| 11/25/2013 6:00  | 0 | 264.362184  | 264.3459728 | 264.344048 | 264.340664 | 264.3377664 |
| 11/25/2013 6:10  | 0 | 264.362184  | 264.3429728 | 264.343048 | 264.337664 | 264.3367664 |
| 11/25/2013 6:20  | 0 | 264.3618792 | 264.3419728 | 264.343048 | 264.337664 | 264.3337664 |
| 11/25/2013 6:30  | 0 | 264.3618792 | 264.3429728 | 264.340048 | 264.337664 | 264.3347664 |
| 11/25/2013 6:40  | 0 | 264.3618792 | 264.3439728 | 264.343048 | 264.338664 | 264.3377664 |
| 11/25/2013 6:50  | 0 | 264.362184  | 264.3409728 | 264.343048 | 264.337664 | 264.3327664 |
| 11/25/2013 7:00  | 0 | 264.3615744 | 264.3439728 | 264.343048 | 264.340664 | 264.3357664 |
| 11/25/2013 7:10  | 0 | 264.3618792 | 264.3409728 | 264.342048 | 264.339664 | 264.3337664 |
| 11/25/2013 7:20  | 0 | 264.3618792 | 264.3419728 | 264.342048 | 264.339664 | 264.3337664 |
| 11/25/2013 7:30  | 0 | 264.3618792 | 264.3409728 | 264.342048 | 264.338664 | 264.3337664 |
| 11/25/2013 7:40  | 0 | 264.3618792 | 264.3439728 | 264.342048 | 264.339664 | 264.3357664 |
| 11/25/2013 7:50  | 0 | 264.3618792 | 264.3439728 | 264.342048 | 264.337664 | 264.3357664 |
| 11/25/2013 8:00  | 0 | 264.3615744 | 264.3419728 | 264.340048 | 264.337664 | 264.3337664 |
| 11/25/2013 8:10  | 0 | 264.3618792 | 264.3439728 | 264.344048 | 264.337664 | 264.3357664 |
| 11/25/2013 8:20  | 0 | 264.3615744 | 264.3429728 | 264.345048 | 264.340664 | 264.3347664 |
| 11/25/2013 8:30  | 0 | 264.3615744 | 264.3449728 | 264.345048 | 264.339664 | 264.3357664 |
| 11/25/2013 8:40  | 0 | 264.3615744 | 264.3459728 | 264.345048 | 264.340664 | 264.3367664 |
| 11/25/2013 8:50  | 0 | 264.3618792 | 264.3449728 | 264.343048 | 264.342664 | 264.3387664 |
| 11/25/2013 9:00  | 0 | 264.3615744 | 264.3399728 | 264.342048 | 264.339664 | 264.3337664 |
| 11/25/2013 9:10  | 0 | 264.3615744 | 264.3439728 | 264.342048 | 264.339664 | 264.3357664 |
| 11/25/2013 9:20  | 0 | 264.3615744 | 264.3439728 | 264.343048 | 264.339664 | 264.3357664 |
| 11/25/2013 9:30  | 0 | 264.3615744 | 264.3439728 | 264.342048 | 264.337664 | 264.3357664 |
| 11/25/2013 9:40  | 0 | 264.3615744 | 264.3439728 | 264.342048 | 264.340664 | 264.3357664 |
| 11/25/2013 9:50  | 0 | 264.3612696 | 264.3459728 | 264.342048 | 264.339664 | 264.3337664 |
| 11/25/2013 10:00 | 0 | 264.3612696 | 264.3439728 | 264.342048 | 264.341664 | 264.3347664 |
| 11/25/2013 10:10 | 0 | 264.3612696 | 264.3429728 | 264.343048 | 264.340664 | 264.3347664 |
| 11/25/2013 10:20 | 0 | 264.3615744 | 264.3429728 | 264.342048 | 264.339664 | 264.3347664 |
| 11/25/2013 10:30 | 0 | 264.3615744 | 264.3429728 | 264.342048 | 264.337664 | 264.3347664 |
| 11/25/2013 10:40 | 0 | 264.3612696 | 264.3429728 | 264.342048 | 264.337664 | 264.3347664 |
| 11/25/2013 10:50 | 0 | 264.3612696 | 264.3429728 | 264.343048 | 264.340664 | 264.3367664 |
| 11/25/2013 11:00 | 0 | 264.3612696 | 264.3429728 | 264.342048 | 264.340664 | 264.3337664 |
| 11/25/2013 11:10 | 0 | 264.3612696 | 264.3429728 | 264.340048 | 264.337664 | 264.3347664 |
| 11/25/2013 11:20 | 0 | 264.3612696 | 264.3439728 | 264.343048 | 264.340664 | 264.3337664 |

|                  |   |             |             |            |            |             |
|------------------|---|-------------|-------------|------------|------------|-------------|
| 11/25/2013 11:30 | 0 | 264.3615744 | 264.3419728 | 264.342048 | 264.339664 | 264.3357664 |
| 11/25/2013 11:40 | 0 | 264.3612696 | 264.3419728 | 264.342048 | 264.341664 | 264.3337664 |
| 11/25/2013 11:50 | 0 | 264.3609648 | 264.3409728 | 264.342048 | 264.340664 | 264.3327664 |
| 11/25/2013 12:00 | 0 | 264.3612696 | 264.3419728 | 264.342048 | 264.341664 | 264.3357664 |
| 11/25/2013 12:10 | 0 | 264.3612696 | 264.3419728 | 264.339048 | 264.340664 | 264.3337664 |
| 11/25/2013 12:20 | 0 | 264.3612696 | 264.3419728 | 264.342048 | 264.342664 | 264.3367664 |
| 11/25/2013 12:30 | 0 | 264.3609648 | 264.3409728 | 264.341048 | 264.341664 | 264.3347664 |
| 11/25/2013 12:40 | 0 | 264.3612696 | 264.3379728 | 264.338048 | 264.336664 | 264.3317664 |
| 11/25/2013 12:50 | 0 | 264.3609648 | 264.3429728 | 264.344048 | 264.341664 | 264.3337664 |
| 11/25/2013 13:00 | 0 | 264.3612696 | 264.3409728 | 264.340048 | 264.341664 | 264.3337664 |
| 11/25/2013 13:10 | 0 | 264.3609648 | 264.3409728 | 264.340048 | 264.341664 | 264.3357664 |
| 11/25/2013 13:20 | 0 | 264.3609648 | 264.3409728 | 264.341048 | 264.339664 | 264.3337664 |
| 11/25/2013 13:30 | 0 | 264.3609648 | 264.3429728 | 264.341048 | 264.341664 | 264.3337664 |
| 11/25/2013 13:40 | 0 | 264.36066   | 264.3459728 | 264.342048 | 264.342664 | 264.3347664 |
| 11/25/2013 13:50 | 0 | 264.3609648 | 264.3419728 | 264.341048 | 264.341664 | 264.3347664 |
| 11/25/2013 14:00 | 0 | 264.3612696 | 264.3419728 | 264.344048 | 264.342664 | 264.3327664 |
| 11/25/2013 14:10 | 0 | 264.3612696 | 264.3419728 | 264.341048 | 264.342664 | 264.3327664 |
| 11/25/2013 14:20 | 0 | 264.3612696 | 264.3419728 | 264.341048 | 264.343664 | 264.3347664 |
| 11/25/2013 14:30 | 0 | 264.3612696 | 264.3419728 | 264.340048 | 264.340664 | 264.3307664 |
| 11/25/2013 14:40 | 0 | 264.3609648 | 264.3399728 | 264.341048 | 264.341664 | 264.3327664 |
| 11/25/2013 14:50 | 0 | 264.3609648 | 264.3419728 | 264.343048 | 264.341664 | 264.3327664 |
| 11/25/2013 15:00 | 0 | 264.3612696 | 264.3409728 | 264.341048 | 264.341664 | 264.3327664 |
| 11/25/2013 15:10 | 0 | 264.3609648 | 264.3429728 | 264.343048 | 264.341664 | 264.3357664 |
| 11/25/2013 15:20 | 0 | 264.3612696 | 264.3419728 | 264.341048 | 264.343664 | 264.3357664 |
| 11/25/2013 15:30 | 0 | 264.3612696 | 264.3429728 | 264.340048 | 264.341664 | 264.3347664 |
| 11/25/2013 15:40 | 0 | 264.3612696 | 264.3439728 | 264.341048 | 264.340664 | 264.3327664 |
| 11/25/2013 15:50 | 0 | 264.3612696 | 264.3429728 | 264.342048 | 264.343664 | 264.3347664 |
| 11/25/2013 16:00 | 0 | 264.3612696 | 264.3419728 | 264.341048 | 264.338664 | 264.3327664 |
| 11/25/2013 16:10 | 0 | 264.3612696 | 264.3419728 | 264.342048 | 264.339664 | 264.3327664 |
| 11/25/2013 16:20 | 0 | 264.3612696 | 264.3439728 | 264.342048 | 264.342664 | 264.3347664 |
| 11/25/2013 16:30 | 0 | 264.3612696 | 264.3429728 | 264.342048 | 264.341664 | 264.3357664 |
| 11/25/2013 16:40 | 0 | 264.3615744 | 264.3439728 | 264.342048 | 264.341664 | 264.3357664 |
| 11/25/2013 16:50 | 0 | 264.3612696 | 264.3429728 | 264.342048 | 264.341664 | 264.3357664 |
| 11/25/2013 17:00 | 0 | 264.3615744 | 264.3429728 | 264.344048 | 264.341664 | 264.3367664 |
| 11/25/2013 17:10 | 0 | 264.3615744 | 264.3429728 | 264.342048 | 264.340664 | 264.3347664 |
| 11/25/2013 17:20 | 0 | 264.362184  | 264.3429728 | 264.343048 | 264.340664 | 264.3357664 |
| 11/25/2013 17:30 | 0 | 264.3624888 | 264.3449728 | 264.345048 | 264.343664 | 264.3377664 |
| 11/25/2013 17:40 | 0 | 264.3630984 | 264.3459728 | 264.343048 | 264.340664 | 264.3357664 |
| 11/25/2013 17:50 | 0 | 264.3634032 | 264.3479728 | 264.346048 | 264.341664 | 264.3377664 |
| 11/25/2013 18:00 | 0 | 264.3643176 | 264.3469728 | 264.345048 | 264.339664 | 264.3367664 |
| 11/25/2013 18:10 | 0 | 264.3646224 | 264.3479728 | 264.347048 | 264.340664 | 264.3367664 |
| 11/25/2013 18:20 | 0 | 264.365232  | 264.3499728 | 264.349048 | 264.342664 | 264.3397664 |
| 11/25/2013 18:30 | 0 | 264.365232  | 264.3479728 | 264.347048 | 264.339664 | 264.3367664 |
| 11/25/2013 18:40 | 0 | 264.3658416 | 264.3479728 | 264.347048 | 264.340664 | 264.3367664 |
| 11/25/2013 18:50 | 0 | 264.3658416 | 264.3519728 | 264.349048 | 264.342664 | 264.3377664 |
| 11/25/2013 19:00 | 0 | 264.3661464 | 264.3519728 | 264.347048 | 264.339664 | 264.3387664 |
| 11/25/2013 19:10 | 0 | 264.3661464 | 264.3499728 | 264.349048 | 264.339664 | 264.3387664 |

|                  |   |             |             |            |            |             |
|------------------|---|-------------|-------------|------------|------------|-------------|
| 11/25/2013 19:20 | 0 | 264.3661464 | 264.3499728 | 264.349048 | 264.337664 | 264.3387664 |
| 11/25/2013 19:30 | 0 | 264.3661464 | 264.3499728 | 264.348048 | 264.341664 | 264.3387664 |
| 11/25/2013 19:40 | 0 | 264.3661464 | 264.3489728 | 264.348048 | 264.338664 | 264.3367664 |
| 11/25/2013 19:50 | 0 | 264.3661464 | 264.3499728 | 264.349048 | 264.339664 | 264.3387664 |
| 11/25/2013 20:00 | 0 | 264.3661464 | 264.3469728 | 264.346048 | 264.338664 | 264.3367664 |
| 11/25/2013 20:10 | 0 | 264.3658416 | 264.3469728 | 264.346048 | 264.338664 | 264.3367664 |
| 11/25/2013 20:20 | 0 | 264.3655368 | 264.3489728 | 264.348048 | 264.339664 | 264.3387664 |
| 11/25/2013 20:30 | 0 | 264.3655368 | 264.3489728 | 264.348048 | 264.339664 | 264.3387664 |
| 11/25/2013 20:40 | 0 | 264.3655368 | 264.3489728 | 264.346048 | 264.339664 | 264.3367664 |
| 11/25/2013 20:50 | 0 | 264.3655368 | 264.3469728 | 264.346048 | 264.339664 | 264.3367664 |
| 11/25/2013 21:00 | 0 | 264.365232  | 264.3479728 | 264.345048 | 264.338664 | 264.3357664 |
| 11/25/2013 21:10 | 0 | 264.365232  | 264.3479728 | 264.346048 | 264.342664 | 264.3387664 |
| 11/25/2013 21:20 | 0 | 264.365232  | 264.3479728 | 264.345048 | 264.339664 | 264.3377664 |
| 11/25/2013 21:30 | 0 | 264.365232  | 264.3449728 | 264.346048 | 264.339664 | 264.3377664 |
| 11/25/2013 21:40 | 0 | 264.365232  | 264.3479728 | 264.346048 | 264.341664 | 264.3377664 |
| 11/25/2013 21:50 | 0 | 264.365232  | 264.3469728 | 264.345048 | 264.339664 | 264.3377664 |
| 11/25/2013 22:00 | 0 | 264.365232  | 264.3479728 | 264.345048 | 264.340664 | 264.3377664 |
| 11/25/2013 22:10 | 0 | 264.365232  | 264.3469728 | 264.345048 | 264.339664 | 264.3347664 |
| 11/25/2013 22:20 | 0 | 264.3649272 | 264.3499728 | 264.347048 | 264.341664 | 264.3377664 |
| 11/25/2013 22:30 | 0 | 264.3649272 | 264.3479728 | 264.346048 | 264.341664 | 264.3377664 |
| 11/25/2013 22:40 | 0 | 264.365232  | 264.3499728 | 264.347048 | 264.341664 | 264.3377664 |
| 11/25/2013 22:50 | 0 | 264.365232  | 264.3499728 | 264.347048 | 264.341664 | 264.3377664 |
| 11/25/2013 23:00 | 0 | 264.365232  | 264.3479728 | 264.346048 | 264.341664 | 264.3377664 |
| 11/25/2013 23:10 | 0 | 264.365232  | 264.3469728 | 264.346048 | 264.341664 | 264.3387664 |
| 11/25/2013 23:20 | 0 | 264.365232  | 264.3489728 | 264.346048 | 264.338664 | 264.3357664 |
| 11/25/2013 23:30 | 0 | 264.365232  | 264.3499728 | 264.349048 | 264.343664 | 264.3397664 |
| 11/25/2013 23:40 | 0 | 264.365232  | 264.3499728 | 264.346048 | 264.339664 | 264.3377664 |
| 11/25/2013 23:50 | 0 | 264.365232  | 264.3479728 | 264.347048 | 264.341664 | 264.3387664 |
| 11/26/2013 0:00  | 0 | 264.365232  | 264.3499728 | 264.349048 | 264.339664 | 264.3397664 |
| 11/26/2013 0:10  | 0 | 264.3655368 | 264.3489728 | 264.347048 | 264.338664 | 264.3387664 |
| 11/26/2013 0:20  | 0 | 264.3655368 | 264.3499728 | 264.348048 | 264.338664 | 264.3387664 |
| 11/26/2013 0:30  | 0 | 264.3658416 | 264.3499728 | 264.348048 | 264.340664 | 264.3387664 |
| 11/26/2013 0:40  | 0 | 264.3658416 | 264.3499728 | 264.347048 | 264.341664 | 264.3387664 |
| 11/26/2013 0:50  | 0 | 264.3658416 | 264.3479728 | 264.347048 | 264.340664 | 264.3397664 |
| 11/26/2013 1:00  | 0 | 264.3661464 | 264.3469728 | 264.346048 | 264.338664 | 264.3367664 |
| 11/26/2013 1:10  | 0 | 264.3661464 | 264.3479728 | 264.347048 | 264.340664 | 264.3367664 |
| 11/26/2013 1:20  | 0 | 264.3661464 | 264.3479728 | 264.348048 | 264.338664 | 264.3367664 |
| 11/26/2013 1:30  | 0 | 264.3664512 | 264.3519728 | 264.347048 | 264.339664 | 264.3377664 |
| 11/26/2013 1:40  | 0 | 264.366756  | 264.3499728 | 264.347048 | 264.339664 | 264.3377664 |
| 11/26/2013 1:50  | 0 | 264.3664512 | 264.3509728 | 264.347048 | 264.339664 | 264.3377664 |
| 11/26/2013 2:00  | 0 | 264.3664512 | 264.3509728 | 264.347048 | 264.339664 | 264.3377664 |
| 11/26/2013 2:10  | 0 | 264.3664512 | 264.3489728 | 264.349048 | 264.340664 | 264.3387664 |
| 11/26/2013 2:20  | 0 | 264.3664512 | 264.3479728 | 264.348048 | 264.341664 | 264.3397664 |
| 11/26/2013 2:30  | 0 | 264.3664512 | 264.3489728 | 264.346048 | 264.338664 | 264.3367664 |
| 11/26/2013 2:40  | 0 | 264.3664512 | 264.3469728 | 264.346048 | 264.336664 | 264.3367664 |
| 11/26/2013 2:50  | 0 | 264.3664512 | 264.3509728 | 264.347048 | 264.340664 | 264.3387664 |
| 11/26/2013 3:00  | 0 | 264.3661464 | 264.3489728 | 264.347048 | 264.339664 | 264.3387664 |

|                  |   |             |             |            |            |             |
|------------------|---|-------------|-------------|------------|------------|-------------|
| 11/26/2013 3:10  | 0 | 264.3661464 | 264.3509728 | 264.347048 | 264.342664 | 264.3387664 |
| 11/26/2013 3:20  | 0 | 264.3661464 | 264.3519728 | 264.349048 | 264.340664 | 264.3417664 |
| 11/26/2013 3:30  | 0 | 264.3661464 | 264.3509728 | 264.349048 | 264.340664 | 264.3387664 |
| 11/26/2013 3:40  | 0 | 264.3661464 | 264.3469728 | 264.346048 | 264.337664 | 264.3377664 |
| 11/26/2013 3:50  | 0 | 264.3661464 | 264.3489728 | 264.347048 | 264.340664 | 264.3387664 |
| 11/26/2013 4:00  | 0 | 264.3661464 | 264.3489728 | 264.346048 | 264.340664 | 264.3407664 |
| 11/26/2013 4:10  | 0 | 264.3658416 | 264.3469728 | 264.346048 | 264.338664 | 264.3387664 |
| 11/26/2013 4:20  | 0 | 264.3655368 | 264.3499728 | 264.347048 | 264.338664 | 264.3397664 |
| 11/26/2013 4:30  | 0 | 264.3655368 | 264.3479728 | 264.347048 | 264.341664 | 264.3397664 |
| 11/26/2013 4:40  | 0 | 264.3655368 | 264.3499728 | 264.347048 | 264.341664 | 264.3407664 |
| 11/26/2013 4:50  | 0 | 264.365232  | 264.3499728 | 264.347048 | 264.339664 | 264.3397664 |
| 11/26/2013 5:00  | 0 | 264.365232  | 264.3479728 | 264.345048 | 264.339664 | 264.3367664 |
| 11/26/2013 5:10  | 0 | 264.365232  | 264.3469728 | 264.345048 | 264.336664 | 264.3387664 |
| 11/26/2013 5:20  | 0 | 264.365232  | 264.3469728 | 264.343048 | 264.336664 | 264.3367664 |
| 11/26/2013 5:30  | 0 | 264.365232  | 264.3449728 | 264.345048 | 264.338664 | 264.3367664 |
| 11/26/2013 5:40  | 0 | 264.365232  | 264.3469728 | 264.345048 | 264.336664 | 264.3387664 |
| 11/26/2013 5:50  | 0 | 264.3649272 | 264.3469728 | 264.345048 | 264.338664 | 264.3397664 |
| 11/26/2013 6:00  | 0 | 264.3649272 | 264.3449728 | 264.345048 | 264.338664 | 264.3367664 |
| 11/26/2013 6:10  | 0 | 264.3649272 | 264.3449728 | 264.345048 | 264.340664 | 264.3367664 |
| 11/26/2013 6:20  | 0 | 264.3646224 | 264.3469728 | 264.343048 | 264.340664 | 264.3377664 |
| 11/26/2013 6:30  | 0 | 264.3646224 | 264.3479728 | 264.346048 | 264.340664 | 264.3397664 |
| 11/26/2013 6:40  | 0 | 264.3643176 | 264.3469728 | 264.345048 | 264.340664 | 264.3387664 |
| 11/26/2013 6:50  | 0 | 264.3646224 | 264.3459728 | 264.344048 | 264.339664 | 264.3377664 |
| 11/26/2013 7:00  | 0 | 264.3643176 | 264.3469728 | 264.344048 | 264.338664 | 264.3347664 |
| 11/26/2013 7:10  | 0 | 264.3643176 | 264.3469728 | 264.344048 | 264.338664 | 264.3367664 |
| 11/26/2013 7:20  | 0 | 264.3643176 | 264.3449728 | 264.343048 | 264.337664 | 264.3357664 |
| 11/26/2013 7:30  | 0 | 264.3640128 | 264.3449728 | 264.346048 | 264.339664 | 264.3367664 |
| 11/26/2013 7:40  | 0 | 264.3640128 | 264.3469728 | 264.344048 | 264.339664 | 264.3387664 |
| 11/26/2013 7:50  | 0 | 264.3640128 | 264.3479728 | 264.344048 | 264.340664 | 264.3357664 |
| 11/26/2013 8:00  | 0 | 264.3640128 | 264.3449728 | 264.343048 | 264.339664 | 264.3367664 |
| 11/26/2013 8:10  | 0 | 264.363708  | 264.3439728 | 264.341048 | 264.338664 | 264.3337664 |
| 11/26/2013 8:20  | 0 | 264.3640128 | 264.3439728 | 264.341048 | 264.338664 | 264.3327664 |
| 11/26/2013 8:30  | 0 | 264.363708  | 264.3469728 | 264.344048 | 264.339664 | 264.3347664 |
| 11/26/2013 8:40  | 0 | 264.363708  | 264.3459728 | 264.344048 | 264.340664 | 264.3357664 |
| 11/26/2013 8:50  | 0 | 264.3634032 | 264.3439728 | 264.344048 | 264.340664 | 264.3347664 |
| 11/26/2013 9:00  | 0 | 264.3634032 | 264.3459728 | 264.345048 | 264.339664 | 264.3377664 |
| 11/26/2013 9:10  | 0 | 264.3634032 | 264.3429728 | 264.344048 | 264.339664 | 264.3367664 |
| 11/26/2013 9:20  | 0 | 264.3634032 | 264.3459728 | 264.344048 | 264.340664 | 264.3367664 |
| 11/26/2013 9:30  | 0 | 264.3630984 | 264.3449728 | 264.342048 | 264.339664 | 264.3357664 |
| 11/26/2013 9:40  | 0 | 264.363708  | 264.3469728 | 264.342048 | 264.341664 | 264.3367664 |
| 11/26/2013 9:50  | 0 | 264.3630984 | 264.3439728 | 264.341048 | 264.340664 | 264.3357664 |
| 11/26/2013 10:00 | 0 | 264.3630984 | 264.3449728 | 264.342048 | 264.338664 | 264.3357664 |
| 11/26/2013 10:10 | 0 | 264.3630984 | 264.3449728 | 264.342048 | 264.340664 | 264.3357664 |
| 11/26/2013 10:20 | 0 | 264.3627936 | 264.3449728 | 264.342048 | 264.340664 | 264.3337664 |
| 11/26/2013 10:30 | 0 | 264.3627936 | 264.3469728 | 264.342048 | 264.339664 | 264.3327664 |
| 11/26/2013 10:40 | 0 | 264.3627936 | 264.3439728 | 264.341048 | 264.338664 | 264.3357664 |
| 11/26/2013 10:50 | 0 | 264.362184  | 264.3449728 | 264.343048 | 264.340664 | 264.3377664 |

|                  |   |             |             |            |            |             |
|------------------|---|-------------|-------------|------------|------------|-------------|
| 11/26/2013 11:00 | 0 | 264.3630984 | 264.3469728 | 264.343048 | 264.339664 | 264.3367664 |
| 11/26/2013 11:10 | 0 | 264.3630984 | 264.3479728 | 264.344048 | 264.339664 | 264.3377664 |
| 11/26/2013 11:20 | 0 | 264.3627936 | 264.3469728 | 264.343048 | 264.343664 | 264.3367664 |
| 11/26/2013 11:30 | 0 | 264.3627936 | 264.3459728 | 264.343048 | 264.342664 | 264.3367664 |
| 11/26/2013 11:40 | 0 | 264.3627936 | 264.3459728 | 264.343048 | 264.340664 | 264.3367664 |
| 11/26/2013 11:50 | 0 | 264.3627936 | 264.3459728 | 264.342048 | 264.339664 | 264.3387664 |
| 11/26/2013 12:00 | 0 | 264.3627936 | 264.3459728 | 264.342048 | 264.341664 | 264.3377664 |
| 11/26/2013 12:10 | 0 | 264.3627936 | 264.3439728 | 264.342048 | 264.339664 | 264.3357664 |
| 11/26/2013 12:20 | 0 | 264.3627936 | 264.3469728 | 264.344048 | 264.343664 | 264.3377664 |
| 11/26/2013 12:30 | 0 | 264.3627936 | 264.3469728 | 264.343048 | 264.340664 | 264.3377664 |
| 11/26/2013 12:40 | 0 | 264.3627936 | 264.3469728 | 264.343048 | 264.343664 | 264.3367664 |
| 11/26/2013 12:50 | 0 | 264.3624888 | 264.3469728 | 264.342048 | 264.342664 | 264.3347664 |
| 11/26/2013 13:00 | 0 | 264.3627936 | 264.3449728 | 264.340048 | 264.342664 | 264.3367664 |
| 11/26/2013 13:10 | 0 | 264.3624888 | 264.3479728 | 264.343048 | 264.341664 | 264.3377664 |
| 11/26/2013 13:20 | 0 | 264.3624888 | 264.3469728 | 264.343048 | 264.339664 | 264.3367664 |
| 11/26/2013 13:30 | 0 | 264.3624888 | 264.3449728 | 264.340048 | 264.338664 | 264.3367664 |
| 11/26/2013 13:40 | 0 | 264.3627936 | 264.3429728 | 264.340048 | 264.338664 | 264.3357664 |
| 11/26/2013 13:50 | 0 | 264.3627936 | 264.3449728 | 264.342048 | 264.339664 | 264.3377664 |
| 11/26/2013 14:00 | 0 | 264.3627936 | 264.3459728 | 264.342048 | 264.337664 | 264.3377664 |
| 11/26/2013 14:10 | 0 | 264.3627936 | 264.3459728 | 264.342048 | 264.339664 | 264.3357664 |
| 11/26/2013 14:20 | 0 | 264.3627936 | 264.3429728 | 264.340048 | 264.341664 | 264.3347664 |
| 11/26/2013 14:30 | 0 | 264.3630984 | 264.3459728 | 264.342048 | 264.338664 | 264.3377664 |
| 11/26/2013 14:40 | 0 | 264.3627936 | 264.3459728 | 264.342048 | 264.337664 | 264.3357664 |
| 11/26/2013 14:50 | 0 | 264.3630984 | 264.3459728 | 264.342048 | 264.341664 | 264.3367664 |
| 11/26/2013 15:00 | 0 | 264.3630984 | 264.3449728 | 264.343048 | 264.341664 | 264.3377664 |
| 11/26/2013 15:10 | 0 | 264.3630984 | 264.3439728 | 264.340048 | 264.338664 | 264.3357664 |
| 11/26/2013 15:20 | 0 | 264.3627936 | 264.3449728 | 264.342048 | 264.340664 | 264.3377664 |
| 11/26/2013 15:30 | 0 | 264.3627936 | 264.3449728 | 264.342048 | 264.341664 | 264.3357664 |
| 11/26/2013 15:40 | 0 | 264.3624888 | 264.3449728 | 264.343048 | 264.339664 | 264.3377664 |
| 11/26/2013 15:50 | 0 | 264.3624888 | 264.3449728 | 264.342048 | 264.338664 | 264.3377664 |
| 11/26/2013 16:00 | 0 | 264.3627936 | 264.3469728 | 264.342048 | 264.338664 | 264.3377664 |
| 11/26/2013 16:10 | 0 | 264.3624888 | 264.3429728 | 264.340048 | 264.339664 | 264.3347664 |
| 11/26/2013 16:20 | 0 | 264.3624888 | 264.3449728 | 264.343048 | 264.341664 | 264.3377664 |
| 11/26/2013 16:30 | 0 | 264.3624888 | 264.3469728 | 264.342048 | 264.340664 | 264.3357664 |
| 11/26/2013 16:40 | 0 | 264.3627936 | 264.3449728 | 264.342048 | 264.338664 | 264.3347664 |
| 11/26/2013 16:50 | 0 | 264.3627936 | 264.3449728 | 264.343048 | 264.340664 | 264.3367664 |
| 11/26/2013 17:00 | 0 | 264.3627936 | 264.3439728 | 264.343048 | 264.340664 | 264.3367664 |
| 11/26/2013 17:10 | 0 | 264.3624888 | 264.3459728 | 264.343048 | 264.337664 | 264.3367664 |
| 11/26/2013 17:20 | 0 | 264.3624888 | 264.3439728 | 264.343048 | 264.341664 | 264.3367664 |
| 11/26/2013 17:30 | 0 | 264.3624888 | 264.3449728 | 264.343048 | 264.338664 | 264.3367664 |
| 11/26/2013 17:40 | 0 | 264.3624888 | 264.3459728 | 264.343048 | 264.343664 | 264.3377664 |
| 11/26/2013 17:50 | 0 | 264.3627936 | 264.3459728 | 264.343048 | 264.342664 | 264.3377664 |
| 11/26/2013 18:00 | 0 | 264.3627936 | 264.3449728 | 264.343048 | 264.340664 | 264.3367664 |
| 11/26/2013 18:10 | 0 | 264.3627936 | 264.3479728 | 264.343048 | 264.338664 | 264.3367664 |
| 11/26/2013 18:20 | 0 | 264.3627936 | 264.3469728 | 264.344048 | 264.342664 | 264.3367664 |
| 11/26/2013 18:30 | 0 | 264.3627936 | 264.3439728 | 264.341048 | 264.341664 | 264.3357664 |
| 11/26/2013 18:40 | 0 | 264.3627936 | 264.3469728 | 264.343048 | 264.337664 | 264.3357664 |

|                  |   |             |             |            |            |             |
|------------------|---|-------------|-------------|------------|------------|-------------|
| 11/26/2013 18:50 | 0 | 264.3627936 | 264.3439728 | 264.343048 | 264.340664 | 264.3357664 |
| 11/26/2013 19:00 | 0 | 264.3627936 | 264.3449728 | 264.341048 | 264.340664 | 264.3347664 |
| 11/26/2013 19:10 | 0 | 264.3627936 | 264.3459728 | 264.343048 | 264.340664 | 264.3367664 |
| 11/26/2013 19:20 | 0 | 264.3630984 | 264.3459728 | 264.344048 | 264.340664 | 264.3367664 |
| 11/26/2013 19:30 | 0 | 264.3627936 | 264.3449728 | 264.343048 | 264.339664 | 264.3377664 |
| 11/26/2013 19:40 | 0 | 264.3630984 | 264.3449728 | 264.344048 | 264.339664 | 264.3367664 |
| 11/26/2013 19:50 | 0 | 264.3630984 | 264.3459728 | 264.344048 | 264.338664 | 264.3377664 |
| 11/26/2013 20:00 | 0 | 264.3630984 | 264.3449728 | 264.343048 | 264.339664 | 264.3367664 |
| 11/26/2013 20:10 | 0 | 264.3630984 | 264.3479728 | 264.345048 | 264.340664 | 264.3387664 |
| 11/26/2013 20:20 | 0 | 264.3634032 | 264.3469728 | 264.343048 | 264.337664 | 264.3357664 |
| 11/26/2013 20:30 | 0 | 264.3630984 | 264.3449728 | 264.344048 | 264.338664 | 264.3367664 |
| 11/26/2013 20:40 | 0 | 264.3630984 | 264.3439728 | 264.344048 | 264.340664 | 264.3367664 |
| 11/26/2013 20:50 | 0 | 264.3634032 | 264.3449728 | 264.342048 | 264.338664 | 264.3357664 |
| 11/26/2013 21:00 | 0 | 264.3634032 | 264.3449728 | 264.342048 | 264.340664 | 264.3357664 |
| 11/26/2013 21:10 | 0 | 264.3630984 | 264.3429728 | 264.342048 | 264.339664 | 264.3367664 |
| 11/26/2013 21:20 | 0 | 264.3630984 | 264.3439728 | 264.342048 | 264.337664 | 264.3367664 |
| 11/26/2013 21:30 | 0 | 264.3634032 | 264.3459728 | 264.344048 | 264.342664 | 264.3397664 |
| 11/26/2013 21:40 | 0 | 264.3634032 | 264.3439728 | 264.344048 | 264.339664 | 264.3367664 |
| 11/26/2013 21:50 | 0 | 264.3634032 | 264.3429728 | 264.341048 | 264.339664 | 264.3367664 |
| 11/26/2013 22:00 | 0 | 264.3634032 | 264.3459728 | 264.342048 | 264.337664 | 264.3357664 |
| 11/26/2013 22:10 | 0 | 264.3630984 | 264.3479728 | 264.342048 | 264.339664 | 264.3367664 |
| 11/26/2013 22:20 | 0 | 264.3634032 | 264.3449728 | 264.341048 | 264.337664 | 264.3347664 |
| 11/26/2013 22:30 | 0 | 264.3630984 | 264.3459728 | 264.345048 | 264.342664 | 264.3357664 |
| 11/26/2013 22:40 | 0 | 264.3634032 | 264.3449728 | 264.343048 | 264.338664 | 264.3367664 |
| 11/26/2013 22:50 | 0 | 264.3630984 | 264.3429728 | 264.342048 | 264.336664 | 264.3347664 |
| 11/26/2013 23:00 | 0 | 264.3634032 | 264.3449728 | 264.343048 | 264.340664 | 264.3367664 |
| 11/26/2013 23:10 | 0 | 264.3630984 | 264.3449728 | 264.343048 | 264.336664 | 264.3367664 |
| 11/26/2013 23:20 | 0 | 264.3630984 | 264.3479728 | 264.345048 | 264.339664 | 264.3377664 |
| 11/26/2013 23:30 | 0 | 264.3630984 | 264.3459728 | 264.345048 | 264.336664 | 264.3387664 |
| 11/26/2013 23:40 | 0 | 264.3630984 | 264.3459728 | 264.345048 | 264.339664 | 264.3377664 |
| 11/26/2013 23:50 | 0 | 264.3627936 | 264.3459728 | 264.343048 | 264.342664 | 264.3367664 |
| 11/27/2013 0:00  | 0 | 264.3627936 | 264.3449728 | 264.342048 | 264.338664 | 264.3367664 |
| 11/27/2013 0:10  | 0 | 264.3627936 | 264.3429728 | 264.343048 | 264.339664 | 264.3367664 |
| 11/27/2013 0:20  | 0 | 264.3630984 | 264.3439728 | 264.342048 | 264.337664 | 264.3357664 |
| 11/27/2013 0:30  | 0 | 264.3634032 | 264.3469728 | 264.343048 | 264.335664 | 264.3377664 |
| 11/27/2013 0:40  | 0 | 264.3627936 | 264.3469728 | 264.342048 | 264.339664 | 264.3357664 |
| 11/27/2013 0:50  | 0 | 264.3627936 | 264.3459728 | 264.344048 | 264.339664 | 264.3377664 |
| 11/27/2013 1:00  | 0 | 264.3627936 | 264.3439728 | 264.344048 | 264.336664 | 264.3367664 |
| 11/27/2013 1:10  | 0 | 264.3627936 | 264.3439728 | 264.342048 | 264.336664 | 264.3377664 |
| 11/27/2013 1:20  | 0 | 264.3627936 | 264.3439728 | 264.341048 | 264.337664 | 264.3377664 |
| 11/27/2013 1:30  | 0 | 264.3627936 | 264.3439728 | 264.341048 | 264.337664 | 264.3357664 |
| 11/27/2013 1:40  | 0 | 264.3624888 | 264.3439728 | 264.342048 | 264.337664 | 264.3357664 |
| 11/27/2013 1:50  | 0 | 264.3624888 | 264.3439728 | 264.342048 | 264.337664 | 264.3377664 |
| 11/27/2013 2:00  | 0 | 264.362184  | 264.3459728 | 264.345048 | 264.339664 | 264.3377664 |
| 11/27/2013 2:10  | 0 | 264.362184  | 264.3429728 | 264.341048 | 264.336664 | 264.3347664 |
| 11/27/2013 2:20  | 0 | 264.362184  | 264.3429728 | 264.341048 | 264.336664 | 264.3347664 |
| 11/27/2013 2:30  | 0 | 264.362184  | 264.3419728 | 264.342048 | 264.336664 | 264.3367664 |

|                  |   |             |             |            |            |             |
|------------------|---|-------------|-------------|------------|------------|-------------|
| 11/27/2013 2:40  | 0 | 264.362184  | 264.3429728 | 264.342048 | 264.336664 | 264.3347664 |
| 11/27/2013 2:50  | 0 | 264.362184  | 264.3409728 | 264.339048 | 264.336664 | 264.3347664 |
| 11/27/2013 3:00  | 0 | 264.362184  | 264.3409728 | 264.341048 | 264.336664 | 264.3347664 |
| 11/27/2013 3:10  | 0 | 264.362184  | 264.3409728 | 264.341048 | 264.335664 | 264.3347664 |
| 11/27/2013 3:20  | 0 | 264.362184  | 264.3409728 | 264.342048 | 264.335664 | 264.3347664 |
| 11/27/2013 3:30  | 0 | 264.362184  | 264.3419728 | 264.339048 | 264.335664 | 264.3337664 |
| 11/27/2013 3:40  | 0 | 264.3618792 | 264.3409728 | 264.341048 | 264.336664 | 264.3347664 |
| 11/27/2013 3:50  | 0 | 264.3618792 | 264.3429728 | 264.341048 | 264.337664 | 264.3347664 |
| 11/27/2013 4:00  | 0 | 264.3618792 | 264.3419728 | 264.341048 | 264.335664 | 264.3337664 |
| 11/27/2013 4:10  | 0 | 264.362184  | 264.3419728 | 264.341048 | 264.337664 | 264.3357664 |
| 11/27/2013 4:20  | 0 | 264.3618792 | 264.3429728 | 264.338048 | 264.336664 | 264.3337664 |
| 11/27/2013 4:30  | 0 | 264.3618792 | 264.3409728 | 264.339048 | 264.337664 | 264.3317664 |
| 11/27/2013 4:40  | 0 | 264.362184  | 264.3409728 | 264.339048 | 264.333664 | 264.3347664 |
| 11/27/2013 4:50  | 0 | 264.3618792 | 264.3429728 | 264.341048 | 264.336664 | 264.3327664 |
| 11/27/2013 5:00  | 0 | 264.3618792 | 264.3439728 | 264.341048 | 264.338664 | 264.3347664 |
| 11/27/2013 5:10  | 0 | 264.3618792 | 264.3409728 | 264.339048 | 264.335664 | 264.3337664 |
| 11/27/2013 5:20  | 0 | 264.3618792 | 264.3389728 | 264.339048 | 264.336664 | 264.3347664 |
| 11/27/2013 5:30  | 0 | 264.3618792 | 264.3409728 | 264.339048 | 264.338664 | 264.3327664 |
| 11/27/2013 5:40  | 0 | 264.3618792 | 264.3409728 | 264.341048 | 264.335664 | 264.3347664 |
| 11/27/2013 5:50  | 0 | 264.362184  | 264.3419728 | 264.339048 | 264.335664 | 264.3337664 |
| 11/27/2013 6:00  | 0 | 264.3618792 | 264.3419728 | 264.341048 | 264.335664 | 264.3337664 |
| 11/27/2013 6:10  | 0 | 264.3618792 | 264.3429728 | 264.341048 | 264.335664 | 264.3347664 |
| 11/27/2013 6:20  | 0 | 264.3618792 | 264.3399728 | 264.341048 | 264.337664 | 264.3337664 |
| 11/27/2013 6:30  | 0 | 264.3618792 | 264.3419728 | 264.339048 | 264.336664 | 264.3337664 |
| 11/27/2013 6:40  | 0 | 264.3618792 | 264.3419728 | 264.340048 | 264.336664 | 264.3357664 |
| 11/27/2013 6:50  | 0 | 264.362184  | 264.3419728 | 264.342048 | 264.337664 | 264.3337664 |
| 11/27/2013 7:00  | 0 | 264.362184  | 264.3429728 | 264.340048 | 264.336664 | 264.3357664 |
| 11/27/2013 7:10  | 0 | 264.362184  | 264.3419728 | 264.340048 | 264.337664 | 264.3367664 |
| 11/27/2013 7:20  | 0 | 264.3618792 | 264.3399728 | 264.339048 | 264.336664 | 264.3357664 |
| 11/27/2013 7:30  | 0 | 264.3618792 | 264.3419728 | 264.340048 | 264.338664 | 264.3357664 |
| 11/27/2013 7:40  | 0 | 264.362184  | 264.3429728 | 264.343048 | 264.339664 | 264.3367664 |
| 11/27/2013 7:50  | 0 | 264.3618792 | 264.3429728 | 264.342048 | 264.337664 | 264.3367664 |
| 11/27/2013 8:00  | 0 | 264.362184  | 264.3439728 | 264.342048 | 264.336664 | 264.3337664 |
| 11/27/2013 8:10  | 0 | 264.362184  | 264.3419728 | 264.341048 | 264.334664 | 264.3327664 |
| 11/27/2013 8:20  | 0 | 264.3618792 | 264.3419728 | 264.339048 | 264.336664 | 264.3347664 |
| 11/27/2013 8:30  | 0 | 264.3618792 | 264.3399728 | 264.339048 | 264.333664 | 264.3327664 |
| 11/27/2013 8:40  | 0 | 264.3615744 | 264.3429728 | 264.340048 | 264.336664 | 264.3347664 |
| 11/27/2013 8:50  | 0 | 264.3618792 | 264.3429728 | 264.342048 | 264.335664 | 264.3347664 |
| 11/27/2013 9:00  | 0 | 264.3618792 | 264.3429728 | 264.342048 | 264.336664 | 264.3347664 |
| 11/27/2013 9:10  | 0 | 264.3618792 | 264.3399728 | 264.339048 | 264.334664 | 264.3357664 |
| 11/27/2013 9:20  | 0 | 264.362184  | 264.3409728 | 264.341048 | 264.335664 | 264.3347664 |
| 11/27/2013 9:30  | 0 | 264.362184  | 264.3409728 | 264.341048 | 264.336664 | 264.3347664 |
| 11/27/2013 9:40  | 0 | 264.362184  | 264.3419728 | 264.341048 | 264.337664 | 264.3327664 |
| 11/27/2013 9:50  | 0 | 264.3618792 | 264.3419728 | 264.342048 | 264.335664 | 264.3327664 |
| 11/27/2013 10:00 | 0 | 264.362184  | 264.3409728 | 264.339048 | 264.337664 | 264.3317664 |
| 11/27/2013 10:10 | 0 | 264.362184  | 264.3409728 | 264.339048 | 264.335664 | 264.3337664 |
| 11/27/2013 10:20 | 0 | 264.362184  | 264.3409728 | 264.341048 | 264.338664 | 264.3367664 |



|                  |   |             |             |            |            |             |
|------------------|---|-------------|-------------|------------|------------|-------------|
| 11/27/2013 10:30 | 0 | 264.3618792 | 264.3409728 | 264.341048 | 264.335664 | 264.3337664 |
| 11/27/2013 10:40 | 0 | 264.3618792 | 264.3409728 | 264.341048 | 264.333664 | 264.3327664 |
| 11/27/2013 10:50 | 0 | 264.3615744 | 264.3419728 | 264.339048 | 264.334664 | 264.3327664 |
| 11/27/2013 11:00 | 0 | 264.3615744 | 264.3399728 | 264.336048 | 264.334664 | 264.3297664 |
| 11/27/2013 11:10 | 0 | 264.3615744 | 264.3429728 | 264.339048 | 264.334664 | 264.3337664 |
| 11/27/2013 11:20 | 0 | 264.3618792 | 264.3409728 | 264.338048 | 264.333664 | 264.3347664 |
| 11/27/2013 11:30 | 0 | 264.3618792 | 264.3419728 | 264.338048 | 264.335664 | 264.3327664 |
| 11/27/2013 11:40 | 0 | 264.362184  | 264.3399728 | 264.337048 | 264.334664 | 264.3317664 |
| 11/27/2013 11:50 | 0 | 264.362184  | 264.3429728 | 264.340048 | 264.335664 | 264.3327664 |
| 11/27/2013 12:00 | 0 | 264.3618792 | 264.3429728 | 264.341048 | 264.336664 | 264.3347664 |
| 11/27/2013 12:10 | 0 | 264.362184  | 264.3419728 | 264.340048 | 264.336664 | 264.3337664 |
| 11/27/2013 12:20 | 0 | 264.3618792 | 264.3399728 | 264.339048 | 264.335664 | 264.3337664 |
| 11/27/2013 12:30 | 0 | 264.362184  | 264.3419728 | 264.339048 | 264.334664 | 264.3337664 |
| 11/27/2013 12:40 | 0 | 264.362184  | 264.3429728 | 264.341048 | 264.335664 | 264.3347664 |
| 11/27/2013 12:50 | 0 | 264.3618792 | 264.3419728 | 264.339048 | 264.333664 | 264.3337664 |
| 11/27/2013 13:00 | 0 | 264.3618792 | 264.3419728 | 264.339048 | 264.335664 | 264.3317664 |
| 11/27/2013 13:10 | 0 | 264.3615744 | 264.3409728 | 264.340048 | 264.336664 | 264.3307664 |
| 11/27/2013 13:20 | 0 | 264.3618792 | 264.3409728 | 264.340048 | 264.336664 | 264.3327664 |
| 11/27/2013 13:30 | 0 | 264.3618792 | 264.3399728 | 264.340048 | 264.335664 | 264.3347664 |
| 11/27/2013 13:40 | 0 | 264.3615744 | 264.3409728 | 264.339048 | 264.334664 | 264.3327664 |
| 11/27/2013 13:50 | 0 | 264.3615744 | 264.3429728 | 264.340048 | 264.335664 | 264.3337664 |
| 11/27/2013 14:00 | 0 | 264.3615744 | 264.3419728 | 264.340048 | 264.334664 | 264.3347664 |
| 11/27/2013 14:10 | 0 | 264.3615744 | 264.3429728 | 264.342048 | 264.337664 | 264.3357664 |
| 11/27/2013 14:20 | 0 | 264.3615744 | 264.3429728 | 264.339048 | 264.336664 | 264.3367664 |
| 11/27/2013 14:30 | 0 | 264.3615744 | 264.3419728 | 264.340048 | 264.335664 | 264.3377664 |
| 11/27/2013 14:40 | 0 | 264.3609648 | 264.3419728 | 264.340048 | 264.334664 | 264.3347664 |
| 11/27/2013 14:50 | 0 | 264.3612696 | 264.3419728 | 264.341048 | 264.333664 | 264.3337664 |
| 11/27/2013 15:00 | 0 | 264.3615744 | 264.3429728 | 264.343048 | 264.337664 | 264.3377664 |
| 11/27/2013 15:10 | 0 | 264.3612696 | 264.3409728 | 264.341048 | 264.335664 | 264.3347664 |
| 11/27/2013 15:20 | 0 | 264.3609648 | 264.3389728 | 264.339048 | 264.335664 | 264.3337664 |
| 11/27/2013 15:30 | 0 | 264.3609648 | 264.3429728 | 264.341048 | 264.337664 | 264.3367664 |
| 11/27/2013 15:40 | 0 | 264.3612696 | 264.3409728 | 264.342048 | 264.336664 | 264.3357664 |
| 11/27/2013 15:50 | 0 | 264.3609648 | 264.3439728 | 264.342048 | 264.335664 | 264.3357664 |
| 11/27/2013 16:00 | 0 | 264.3609648 | 264.3399728 | 264.339048 | 264.333664 | 264.3347664 |
| 11/27/2013 16:10 | 0 | 264.3609648 | 264.3389728 | 264.338048 | 264.334664 | 264.3317664 |
| 11/27/2013 16:20 | 0 | 264.3612696 | 264.3409728 | 264.339048 | 264.336664 | 264.3337664 |
| 11/27/2013 16:30 | 0 | 264.3612696 | 264.3419728 | 264.341048 | 264.335664 | 264.3347664 |
| 11/27/2013 16:40 | 0 | 264.3612696 | 264.3419728 | 264.339048 | 264.333664 | 264.3337664 |
| 11/27/2013 16:50 | 0 | 264.3609648 | 264.3429728 | 264.341048 | 264.336664 | 264.3347664 |
| 11/27/2013 17:00 | 0 | 264.3609648 | 264.3409728 | 264.341048 | 264.332664 | 264.3337664 |
| 11/27/2013 17:10 | 0 | 264.3609648 | 264.3409728 | 264.342048 | 264.334664 | 264.3337664 |
| 11/27/2013 17:20 | 0 | 264.3612696 | 264.3419728 | 264.340048 | 264.333664 | 264.3347664 |
| 11/27/2013 17:30 | 0 | 264.3609648 | 264.3409728 | 264.340048 | 264.333664 | 264.3337664 |
| 11/27/2013 17:40 | 0 | 264.3609648 | 264.3419728 | 264.341048 | 264.336664 | 264.3347664 |
| 11/27/2013 17:50 | 0 | 264.3612696 | 264.3419728 | 264.341048 | 264.334664 | 264.3347664 |
| 11/27/2013 18:00 | 0 | 264.3609648 | 264.3419728 | 264.340048 | 264.334664 | 264.3357664 |
| 11/27/2013 18:10 | 0 | 264.3609648 | 264.3419728 | 264.340048 | 264.332664 | 264.3327664 |

|                  |   |             |             |            |            |             |
|------------------|---|-------------|-------------|------------|------------|-------------|
| 11/27/2013 18:20 | 0 | 264.3609648 | 264.3419728 | 264.340048 | 264.330664 | 264.3327664 |
| 11/27/2013 18:30 | 0 | 264.3609648 | 264.3399728 | 264.340048 | 264.332664 | 264.3307664 |
| 11/27/2013 18:40 | 0 | 264.3609648 | 264.3429728 | 264.341048 | 264.333664 | 264.3337664 |
| 11/27/2013 18:50 | 0 | 264.3612696 | 264.3429728 | 264.340048 | 264.333664 | 264.3337664 |
| 11/27/2013 19:00 | 0 | 264.3609648 | 264.3419728 | 264.340048 | 264.332664 | 264.3327664 |
| 11/27/2013 19:10 | 0 | 264.3612696 | 264.3419728 | 264.337048 | 264.332664 | 264.3327664 |
| 11/27/2013 19:20 | 0 | 264.3609648 | 264.3419728 | 264.340048 | 264.334664 | 264.3337664 |
| 11/27/2013 19:30 | 0 | 264.3612696 | 264.3429728 | 264.339048 | 264.335664 | 264.3337664 |
| 11/27/2013 19:40 | 0 | 264.3612696 | 264.3439728 | 264.340048 | 264.332664 | 264.3327664 |
| 11/27/2013 19:50 | 0 | 264.3615744 | 264.3419728 | 264.342048 | 264.331664 | 264.3337664 |
| 11/27/2013 20:00 | 0 | 264.3612696 | 264.3429728 | 264.340048 | 264.334664 | 264.3347664 |
| 11/27/2013 20:10 | 0 | 264.3615744 | 264.3439728 | 264.341048 | 264.335664 | 264.3337664 |
| 11/27/2013 20:20 | 0 | 264.3609648 | 264.3459728 | 264.342048 | 264.334664 | 264.3347664 |
| 11/27/2013 20:30 | 0 | 264.3609648 | 264.3419728 | 264.339048 | 264.334664 | 264.3347664 |
| 11/27/2013 20:40 | 0 | 264.3612696 | 264.3439728 | 264.341048 | 264.333664 | 264.3327664 |
| 11/27/2013 20:50 | 0 | 264.3609648 | 264.3429728 | 264.342048 | 264.336664 | 264.3337664 |
| 11/27/2013 21:00 | 0 | 264.3609648 | 264.3419728 | 264.340048 | 264.335664 | 264.3337664 |
| 11/27/2013 21:10 | 0 | 264.3612696 | 264.3439728 | 264.340048 | 264.333664 | 264.3337664 |
| 11/27/2013 21:20 | 0 | 264.3609648 | 264.3419728 | 264.342048 | 264.335664 | 264.3337664 |
| 11/27/2013 21:30 | 0 | 264.3609648 | 264.3439728 | 264.340048 | 264.333664 | 264.3317664 |
| 11/27/2013 21:40 | 0 | 264.3612696 | 264.3419728 | 264.340048 | 264.333664 | 264.3347664 |
| 11/27/2013 21:50 | 0 | 264.3609648 | 264.3419728 | 264.342048 | 264.335664 | 264.3357664 |
| 11/27/2013 22:00 | 0 | 264.3612696 | 264.3419728 | 264.342048 | 264.333664 | 264.3357664 |
| 11/27/2013 22:10 | 0 | 264.3612696 | 264.3439728 | 264.342048 | 264.334664 | 264.3357664 |
| 11/27/2013 22:20 | 0 | 264.3612696 | 264.3419728 | 264.342048 | 264.334664 | 264.3347664 |
| 11/27/2013 22:30 | 0 | 264.3612696 | 264.3419728 | 264.341048 | 264.334664 | 264.3347664 |
| 11/27/2013 22:40 | 0 | 264.3612696 | 264.3429728 | 264.342048 | 264.334664 | 264.3337664 |
| 11/27/2013 22:50 | 0 | 264.3612696 | 264.3419728 | 264.339048 | 264.332664 | 264.3317664 |
| 11/27/2013 23:00 | 0 | 264.3612696 | 264.3439728 | 264.342048 | 264.335664 | 264.3337664 |
| 11/27/2013 23:10 | 0 | 264.3609648 | 264.3409728 | 264.342048 | 264.333664 | 264.3357664 |
| 11/27/2013 23:20 | 0 | 264.3612696 | 264.3439728 | 264.341048 | 264.334664 | 264.3347664 |
| 11/27/2013 23:30 | 0 | 264.3609648 | 264.3439728 | 264.343048 | 264.335664 | 264.3347664 |
| 11/27/2013 23:40 | 0 | 264.3612696 | 264.3429728 | 264.340048 | 264.333664 | 264.3327664 |
| 11/27/2013 23:50 | 0 | 264.3612696 | 264.3429728 | 264.341048 | 264.333664 | 264.3327664 |
| 11/28/2013 0:00  | 0 | 264.3612696 | 264.3439728 | 264.341048 | 264.333664 | 264.3337664 |
| 11/28/2013 0:10  | 0 | 264.3612696 | 264.3409728 | 264.339048 | 264.331664 | 264.3327664 |
| 11/28/2013 0:20  | 0 | 264.3612696 | 264.3429728 | 264.340048 | 264.332664 | 264.3317664 |
| 11/28/2013 0:30  | 0 | 264.3609648 | 264.3409728 | 264.341048 | 264.334664 | 264.3337664 |
| 11/28/2013 0:40  | 0 | 264.3612696 | 264.3409728 | 264.340048 | 264.334664 | 264.3337664 |
| 11/28/2013 0:50  | 0 | 264.3609648 | 264.3409728 | 264.340048 | 264.332664 | 264.3357664 |
| 11/28/2013 1:00  | 0 | 264.3612696 | 264.3409728 | 264.340048 | 264.334664 | 264.3317664 |
| 11/28/2013 1:10  | 0 | 264.3609648 | 264.3419728 | 264.341048 | 264.333664 | 264.3367664 |
| 11/28/2013 1:20  | 0 | 264.3612696 | 264.3409728 | 264.339048 | 264.332664 | 264.3337664 |
| 11/28/2013 1:30  | 0 | 264.3612696 | 264.3419728 | 264.340048 | 264.332664 | 264.3327664 |
| 11/28/2013 1:40  | 0 | 264.3612696 | 264.3429728 | 264.340048 | 264.333664 | 264.3347664 |
| 11/28/2013 1:50  | 0 | 264.3609648 | 264.3389728 | 264.339048 | 264.330664 | 264.3307664 |
| 11/28/2013 2:00  | 0 | 264.3609648 | 264.3409728 | 264.340048 | 264.333664 | 264.3317664 |

|                 |   |             |             |            |            |             |
|-----------------|---|-------------|-------------|------------|------------|-------------|
| 11/28/2013 2:10 | 0 | 264.3609648 | 264.3409728 | 264.338048 | 264.333664 | 264.3317664 |
| 11/28/2013 2:20 | 0 | 264.3609648 | 264.3409728 | 264.340048 | 264.332664 | 264.3347664 |
| 11/28/2013 2:30 | 0 | 264.3612696 | 264.3429728 | 264.340048 | 264.335664 | 264.3347664 |
| 11/28/2013 2:40 | 0 | 264.3609648 | 264.3409728 | 264.339048 | 264.334664 | 264.3337664 |
| 11/28/2013 2:50 | 0 | 264.3609648 | 264.3459728 | 264.342048 | 264.335664 | 264.3367664 |
| 11/28/2013 3:00 | 0 | 264.3612696 | 264.3409728 | 264.339048 | 264.332664 | 264.3337664 |
| 11/28/2013 3:10 | 0 | 264.3612696 | 264.3429728 | 264.339048 | 264.332664 | 264.3337664 |
| 11/28/2013 3:20 | 0 | 264.3609648 | 264.3429728 | 264.339048 | 264.333664 | 264.3337664 |
| 11/28/2013 3:30 | 0 | 264.3609648 | 264.3409728 | 264.340048 | 264.333664 | 264.3337664 |
| 11/28/2013 3:40 | 0 | 264.3609648 | 264.3429728 | 264.339048 | 264.334664 | 264.3317664 |
| 11/28/2013 3:50 | 0 | 264.36066   | 264.3419728 | 264.337048 | 264.333664 | 264.3287664 |
| 11/28/2013 4:00 | 0 | 264.3609648 | 264.3409728 | 264.340048 | 264.334664 | 264.3317664 |
| 11/28/2013 4:10 | 0 | 264.3609648 | 264.3429728 | 264.339048 | 264.332664 | 264.3317664 |
| 11/28/2013 4:20 | 0 | 264.36066   | 264.3409728 | 264.339048 | 264.333664 | 264.3337664 |
| 11/28/2013 4:30 | 0 | 264.3609648 | 264.3429728 | 264.340048 | 264.334664 | 264.3317664 |
| 11/28/2013 4:40 | 0 | 264.36066   | 264.3419728 | 264.339048 | 264.331664 | 264.3307664 |
| 11/28/2013 4:50 | 0 | 264.36066   | 264.3429728 | 264.341048 | 264.334664 | 264.3337664 |
| 11/28/2013 5:00 | 0 | 264.3609648 | 264.3429728 | 264.340048 | 264.334664 | 264.3337664 |
| 11/28/2013 5:10 | 0 | 264.36066   | 264.3399728 | 264.339048 | 264.333664 | 264.3307664 |
| 11/28/2013 5:20 | 0 | 264.3609648 | 264.3419728 | 264.340048 | 264.333664 | 264.3327664 |
| 11/28/2013 5:30 | 0 | 264.3603552 | 264.3409728 | 264.339048 | 264.333664 | 264.3317664 |
| 11/28/2013 5:40 | 0 | 264.36066   | 264.3409728 | 264.338048 | 264.331664 | 264.3297664 |
| 11/28/2013 5:50 | 0 | 264.3603552 | 264.3399728 | 264.338048 | 264.331664 | 264.3307664 |
| 11/28/2013 6:00 | 0 | 264.36066   | 264.3409728 | 264.338048 | 264.333664 | 264.3337664 |
| 11/28/2013 6:10 | 0 | 264.36066   | 264.3399728 | 264.340048 | 264.332664 | 264.3327664 |
| 11/28/2013 6:20 | 0 | 264.3603552 | 264.3409728 | 264.338048 | 264.333664 | 264.3337664 |
| 11/28/2013 6:30 | 0 | 264.36066   | 264.3399728 | 264.338048 | 264.330664 | 264.3327664 |
| 11/28/2013 6:40 | 0 | 264.3603552 | 264.3389728 | 264.338048 | 264.329664 | 264.3317664 |
| 11/28/2013 6:50 | 0 | 264.3603552 | 264.3399728 | 264.338048 | 264.331664 | 264.3297664 |
| 11/28/2013 7:00 | 0 | 264.3603552 | 264.3439728 | 264.340048 | 264.335664 | 264.3337664 |
| 11/28/2013 7:10 | 0 | 264.3603552 | 264.3409728 | 264.339048 | 264.334664 | 264.3327664 |
| 11/28/2013 7:20 | 0 | 264.3603552 | 264.3399728 | 264.339048 | 264.335664 | 264.3317664 |
| 11/28/2013 7:30 | 0 | 264.3603552 | 264.3399728 | 264.339048 | 264.332664 | 264.3317664 |
| 11/28/2013 7:40 | 0 | 264.3600504 | 264.3409728 | 264.338048 | 264.332664 | 264.3307664 |
| 11/28/2013 7:50 | 0 | 264.3603552 | 264.3379728 | 264.338048 | 264.333664 | 264.3297664 |
| 11/28/2013 8:00 | 0 | 264.3603552 | 264.3379728 | 264.337048 | 264.332664 | 264.3317664 |
| 11/28/2013 8:10 | 0 | 264.3600504 | 264.3399728 | 264.339048 | 264.333664 | 264.3307664 |
| 11/28/2013 8:20 | 0 | 264.3600504 | 264.3409728 | 264.337048 | 264.333664 | 264.3317664 |
| 11/28/2013 8:30 | 0 | 264.3600504 | 264.3379728 | 264.337048 | 264.330664 | 264.3297664 |
| 11/28/2013 8:40 | 0 | 264.3600504 | 264.3379728 | 264.338048 | 264.331664 | 264.3287664 |
| 11/28/2013 8:50 | 0 | 264.3600504 | 264.3409728 | 264.340048 | 264.334664 | 264.3317664 |
| 11/28/2013 9:00 | 0 | 264.3600504 | 264.3399728 | 264.338048 | 264.333664 | 264.3317664 |
| 11/28/2013 9:10 | 0 | 264.3600504 | 264.3379728 | 264.337048 | 264.333664 | 264.3307664 |
| 11/28/2013 9:20 | 0 | 264.3600504 | 264.3399728 | 264.338048 | 264.331664 | 264.3317664 |
| 11/28/2013 9:30 | 0 | 264.3597456 | 264.3389728 | 264.338048 | 264.333664 | 264.3307664 |
| 11/28/2013 9:40 | 0 | 264.3600504 | 264.3389728 | 264.339048 | 264.333664 | 264.3307664 |
| 11/28/2013 9:50 | 0 | 264.3597456 | 264.3399728 | 264.338048 | 264.334664 | 264.3317664 |

|                  |   |             |             |            |            |             |
|------------------|---|-------------|-------------|------------|------------|-------------|
| 11/28/2013 10:00 | 0 | 264.3597456 | 264.3389728 | 264.338048 | 264.331664 | 264.3297664 |
| 11/28/2013 10:10 | 0 | 264.3597456 | 264.3389728 | 264.339048 | 264.332664 | 264.3307664 |
| 11/28/2013 10:20 | 0 | 264.3600504 | 264.3419728 | 264.339048 | 264.334664 | 264.3327664 |
| 11/28/2013 10:30 | 0 | 264.3600504 | 264.3379728 | 264.339048 | 264.333664 | 264.3297664 |
| 11/28/2013 10:40 | 0 | 264.3597456 | 264.3369728 | 264.336048 | 264.330664 | 264.3287664 |
| 11/28/2013 10:50 | 0 | 264.3597456 | 264.3399728 | 264.340048 | 264.332664 | 264.3327664 |
| 11/28/2013 11:00 | 0 | 264.3597456 | 264.3379728 | 264.337048 | 264.333664 | 264.3297664 |
| 11/28/2013 11:10 | 0 | 264.3597456 | 264.3359728 | 264.337048 | 264.330664 | 264.3297664 |
| 11/28/2013 11:20 | 0 | 264.3594408 | 264.3379728 | 264.337048 | 264.332664 | 264.3307664 |
| 11/28/2013 11:30 | 0 | 264.3594408 | 264.3389728 | 264.338048 | 264.332664 | 264.3307664 |
| 11/28/2013 11:40 | 0 | 264.359136  | 264.3369728 | 264.337048 | 264.330664 | 264.3297664 |
| 11/28/2013 11:50 | 0 | 264.3594408 | 264.3389728 | 264.340048 | 264.334664 | 264.3307664 |
| 11/28/2013 12:00 | 0 | 264.359136  | 264.3389728 | 264.337048 | 264.330664 | 264.3297664 |
| 11/28/2013 12:10 | 0 | 264.359136  | 264.3399728 | 264.341048 | 264.334664 | 264.3307664 |
| 11/28/2013 12:20 | 0 | 264.3594408 | 264.3399728 | 264.338048 | 264.333664 | 264.3307664 |
| 11/28/2013 12:30 | 0 | 264.359136  | 264.3399728 | 264.338048 | 264.333664 | 264.3307664 |
| 11/28/2013 12:40 | 0 | 264.359136  | 264.3419728 | 264.340048 | 264.336664 | 264.3337664 |
| 11/28/2013 12:50 | 0 | 264.359136  | 264.3419728 | 264.341048 | 264.333664 | 264.3307664 |
| 11/28/2013 13:00 | 0 | 264.3588312 | 264.3409728 | 264.341048 | 264.335664 | 264.3327664 |
| 11/28/2013 13:10 | 0 | 264.359136  | 264.3389728 | 264.339048 | 264.335664 | 264.3317664 |
| 11/28/2013 13:20 | 0 | 264.359136  | 264.3379728 | 264.338048 | 264.331664 | 264.3307664 |
| 11/28/2013 13:30 | 0 | 264.3588312 | 264.3399728 | 264.339048 | 264.332664 | 264.3307664 |
| 11/28/2013 13:40 | 0 | 264.3588312 | 264.3379728 | 264.338048 | 264.333664 | 264.3307664 |
| 11/28/2013 13:50 | 0 | 264.359136  | 264.3419728 | 264.339048 | 264.331664 | 264.3307664 |
| 11/28/2013 14:00 | 0 | 264.3588312 | 264.3409728 | 264.341048 | 264.334664 | 264.3337664 |
| 11/28/2013 14:10 | 0 | 264.359136  | 264.3399728 | 264.341048 | 264.335664 | 264.3327664 |
| 11/28/2013 14:20 | 0 | 264.3588312 | 264.3389728 | 264.338048 | 264.332664 | 264.3317664 |
| 11/28/2013 14:30 | 0 | 264.3585264 | 264.3389728 | 264.339048 | 264.333664 | 264.3317664 |
| 11/28/2013 14:40 | 0 | 264.3585264 | 264.3389728 | 264.340048 | 264.332664 | 264.3317664 |
| 11/28/2013 14:50 | 0 | 264.3585264 | 264.3399728 | 264.339048 | 264.333664 | 264.3307664 |
| 11/28/2013 15:00 | 0 | 264.3588312 | 264.3379728 | 264.339048 | 264.331664 | 264.3317664 |
| 11/28/2013 15:10 | 0 | 264.3588312 | 264.3399728 | 264.338048 | 264.333664 | 264.3307664 |
| 11/28/2013 15:20 | 0 | 264.3588312 | 264.3399728 | 264.338048 | 264.335664 | 264.3317664 |
| 11/28/2013 15:30 | 0 | 264.3585264 | 264.3399728 | 264.339048 | 264.335664 | 264.3327664 |
| 11/28/2013 15:40 | 0 | 264.3585264 | 264.3409728 | 264.340048 | 264.337664 | 264.3337664 |
| 11/28/2013 15:50 | 0 | 264.3585264 | 264.3419728 | 264.338048 | 264.336664 | 264.3307664 |
| 11/28/2013 16:00 | 0 | 264.3585264 | 264.3399728 | 264.339048 | 264.334664 | 264.3317664 |
| 11/28/2013 16:10 | 0 | 264.3585264 | 264.3439728 | 264.339048 | 264.336664 | 264.3327664 |
| 11/28/2013 16:20 | 0 | 264.3585264 | 264.3389728 | 264.339048 | 264.333664 | 264.3317664 |
| 11/28/2013 16:30 | 0 | 264.3585264 | 264.3409728 | 264.339048 | 264.335664 | 264.3317664 |
| 11/28/2013 16:40 | 0 | 264.3585264 | 264.3409728 | 264.340048 | 264.336664 | 264.3307664 |
| 11/28/2013 16:50 | 0 | 264.3582216 | 264.3399728 | 264.339048 | 264.333664 | 264.3317664 |
| 11/28/2013 17:00 | 0 | 264.3585264 | 264.3409728 | 264.337048 | 264.335664 | 264.3287664 |
| 11/28/2013 17:10 | 0 | 264.3585264 | 264.3389728 | 264.337048 | 264.334664 | 264.3287664 |
| 11/28/2013 17:20 | 0 | 264.3585264 | 264.3389728 | 264.338048 | 264.334664 | 264.3287664 |
| 11/28/2013 17:30 | 0 | 264.3585264 | 264.3429728 | 264.340048 | 264.336664 | 264.3307664 |
| 11/28/2013 17:40 | 0 | 264.359136  | 264.3429728 | 264.341048 | 264.334664 | 264.3327664 |

|                  |   |             |             |            |            |             |
|------------------|---|-------------|-------------|------------|------------|-------------|
| 11/28/2013 17:50 | 0 | 264.3603552 | 264.3459728 | 264.343048 | 264.334664 | 264.3337664 |
| 11/28/2013 18:00 | 0 | 264.3612696 | 264.3459728 | 264.341048 | 264.333664 | 264.3327664 |
| 11/28/2013 18:10 | 0 | 264.3618792 | 264.3459728 | 264.342048 | 264.333664 | 264.3317664 |
| 11/28/2013 18:20 | 0 | 264.3624888 | 264.3479728 | 264.345048 | 264.334664 | 264.3337664 |
| 11/28/2013 18:30 | 0 | 264.3627936 | 264.3469728 | 264.346048 | 264.334664 | 264.3337664 |
| 11/28/2013 18:40 | 0 | 264.3624888 | 264.3469728 | 264.345048 | 264.336664 | 264.3347664 |
| 11/28/2013 18:50 | 0 | 264.3624888 | 264.3459728 | 264.345048 | 264.334664 | 264.3347664 |
| 11/28/2013 19:00 | 0 | 264.362184  | 264.3459728 | 264.344048 | 264.333664 | 264.3347664 |
| 11/28/2013 19:10 | 0 | 264.3618792 | 264.3429728 | 264.342048 | 264.332664 | 264.3327664 |
| 11/28/2013 19:20 | 0 | 264.3615744 | 264.3439728 | 264.343048 | 264.337664 | 264.3347664 |
| 11/28/2013 19:30 | 0 | 264.3612696 | 264.3429728 | 264.343048 | 264.334664 | 264.3347664 |
| 11/28/2013 19:40 | 0 | 264.3609648 | 264.3429728 | 264.342048 | 264.334664 | 264.3317664 |
| 11/28/2013 19:50 | 0 | 264.36066   | 264.3409728 | 264.339048 | 264.333664 | 264.3327664 |
| 11/28/2013 20:00 | 0 | 264.3603552 | 264.3409728 | 264.341048 | 264.335664 | 264.3327664 |
| 11/28/2013 20:10 | 0 | 264.3600504 | 264.3409728 | 264.340048 | 264.335664 | 264.3327664 |
| 11/28/2013 20:20 | 0 | 264.3594408 | 264.3389728 | 264.339048 | 264.334664 | 264.3317664 |
| 11/28/2013 20:30 | 0 | 264.3594408 | 264.3379728 | 264.339048 | 264.332664 | 264.3307664 |
| 11/28/2013 20:40 | 0 | 264.3594408 | 264.3409728 | 264.342048 | 264.334664 | 264.3317664 |
| 11/28/2013 20:50 | 0 | 264.3594408 | 264.3369728 | 264.336048 | 264.333664 | 264.3327664 |
| 11/28/2013 21:00 | 0 | 264.3594408 | 264.3409728 | 264.340048 | 264.334664 | 264.3317664 |
| 11/28/2013 21:10 | 0 | 264.3594408 | 264.3399728 | 264.340048 | 264.333664 | 264.3317664 |
| 11/28/2013 21:20 | 0 | 264.359136  | 264.3399728 | 264.339048 | 264.333664 | 264.3307664 |
| 11/28/2013 21:30 | 0 | 264.3597456 | 264.3399728 | 264.340048 | 264.331664 | 264.3327664 |
| 11/28/2013 21:40 | 0 | 264.3594408 | 264.3399728 | 264.340048 | 264.335664 | 264.3307664 |
| 11/28/2013 21:50 | 0 | 264.359136  | 264.3399728 | 264.340048 | 264.332664 | 264.3307664 |
| 11/28/2013 22:00 | 0 | 264.3597456 | 264.3399728 | 264.342048 | 264.335664 | 264.3307664 |
| 11/28/2013 22:10 | 0 | 264.3594408 | 264.3409728 | 264.339048 | 264.336664 | 264.3317664 |
| 11/28/2013 22:20 | 0 | 264.3594408 | 264.3419728 | 264.342048 | 264.337664 | 264.3327664 |
| 11/28/2013 22:30 | 0 | 264.3594408 | 264.3409728 | 264.339048 | 264.331664 | 264.3307664 |
| 11/28/2013 22:40 | 0 | 264.3594408 | 264.3399728 | 264.339048 | 264.333664 | 264.3307664 |
| 11/28/2013 22:50 | 0 | 264.3594408 | 264.3419728 | 264.338048 | 264.330664 | 264.3307664 |
| 11/28/2013 23:00 | 0 | 264.3594408 | 264.3419728 | 264.340048 | 264.332664 | 264.3307664 |
| 11/28/2013 23:10 | 0 | 264.3594408 | 264.3399728 | 264.338048 | 264.332664 | 264.3287664 |
| 11/28/2013 23:20 | 0 | 264.3594408 | 264.3429728 | 264.340048 | 264.333664 | 264.3307664 |
| 11/28/2013 23:30 | 0 | 264.3597456 | 264.3429728 | 264.340048 | 264.332664 | 264.3307664 |
| 11/28/2013 23:40 | 0 | 264.3594408 | 264.3419728 | 264.337048 | 264.331664 | 264.3307664 |
| 11/28/2013 23:50 | 0 | 264.359136  | 264.3399728 | 264.337048 | 264.331664 | 264.3317664 |
| 11/29/2013 0:00  | 0 | 264.3594408 | 264.3389728 | 264.336048 | 264.330664 | 264.3297664 |
| 11/29/2013 0:10  | 0 | 264.3594408 | 264.3389728 | 264.337048 | 264.327664 | 264.3317664 |
| 11/29/2013 0:20  | 0 | 264.3594408 | 264.3419728 | 264.339048 | 264.333664 | 264.3317664 |
| 11/29/2013 0:30  | 0 | 264.3594408 | 264.3409728 | 264.339048 | 264.332664 | 264.3307664 |
| 11/29/2013 0:40  | 0 | 264.3594408 | 264.3409728 | 264.340048 | 264.333664 | 264.3317664 |
| 11/29/2013 0:50  | 0 | 264.3594408 | 264.3429728 | 264.340048 | 264.332664 | 264.3337664 |
| 11/29/2013 1:00  | 0 | 264.3594408 | 264.3419728 | 264.340048 | 264.337664 | 264.3317664 |
| 11/29/2013 1:10  | 0 | 264.3594408 | 264.3369728 | 264.336048 | 264.331664 | 264.3277664 |
| 11/29/2013 1:20  | 0 | 264.3594408 | 264.3379728 | 264.336048 | 264.328664 | 264.3307664 |
| 11/29/2013 1:30  | 0 | 264.3594408 | 264.3389728 | 264.339048 | 264.330664 | 264.3307664 |

|                 |   |             |             |            |            |             |
|-----------------|---|-------------|-------------|------------|------------|-------------|
| 11/29/2013 1:40 | 0 | 264.3594408 | 264.3409728 | 264.340048 | 264.331664 | 264.3317664 |
| 11/29/2013 1:50 | 0 | 264.359136  | 264.3409728 | 264.340048 | 264.331664 | 264.3317664 |
| 11/29/2013 2:00 | 0 | 264.3594408 | 264.3409728 | 264.340048 | 264.333664 | 264.3317664 |
| 11/29/2013 2:10 | 0 | 264.3594408 | 264.3389728 | 264.337048 | 264.331664 | 264.3297664 |
| 11/29/2013 2:20 | 0 | 264.3594408 | 264.3399728 | 264.339048 | 264.333664 | 264.3317664 |
| 11/29/2013 2:30 | 0 | 264.359136  | 264.3389728 | 264.336048 | 264.330664 | 264.3317664 |
| 11/29/2013 2:40 | 0 | 264.3594408 | 264.3389728 | 264.337048 | 264.331664 | 264.3317664 |
| 11/29/2013 2:50 | 0 | 264.359136  | 264.3399728 | 264.340048 | 264.332664 | 264.3327664 |
| 11/29/2013 3:00 | 0 | 264.359136  | 264.3369728 | 264.339048 | 264.331664 | 264.3317664 |
| 11/29/2013 3:10 | 0 | 264.359136  | 264.3399728 | 264.337048 | 264.330664 | 264.3307664 |
| 11/29/2013 3:20 | 0 | 264.3594408 | 264.3399728 | 264.337048 | 264.331664 | 264.3297664 |
| 11/29/2013 3:30 | 0 | 264.359136  | 264.3379728 | 264.340048 | 264.331664 | 264.3317664 |
| 11/29/2013 3:40 | 0 | 264.359136  | 264.3379728 | 264.338048 | 264.329664 | 264.3317664 |
| 11/29/2013 3:50 | 0 | 264.359136  | 264.3399728 | 264.338048 | 264.327664 | 264.3307664 |
| 11/29/2013 4:00 | 0 | 264.3594408 | 264.3379728 | 264.336048 | 264.329664 | 264.3307664 |
| 11/29/2013 4:10 | 0 | 264.3594408 | 264.3379728 | 264.336048 | 264.325664 | 264.3297664 |
| 11/29/2013 4:20 | 0 | 264.3594408 | 264.3379728 | 264.337048 | 264.324664 | 264.3297664 |
| 11/29/2013 4:30 | 0 | 264.359136  | 264.3399728 | 264.338048 | 264.325664 | 264.3327664 |
| 11/29/2013 4:40 | 0 | 264.3594408 | 264.3379728 | 264.337048 | 264.326664 | 264.3307664 |
| 11/29/2013 4:50 | 0 | 264.3594408 | 264.3379728 | 264.340048 | 264.327664 | 264.3307664 |
| 11/29/2013 5:00 | 0 | 264.359136  | 264.3399728 | 264.338048 | 264.332664 | 264.3327664 |
| 11/29/2013 5:10 | 0 | 264.3594408 | 264.3379728 | 264.338048 | 264.331664 | 264.3327664 |
| 11/29/2013 5:20 | 0 | 264.359136  | 264.3399728 | 264.338048 | 264.332664 | 264.3307664 |
| 11/29/2013 5:30 | 0 | 264.359136  | 264.3379728 | 264.338048 | 264.331664 | 264.3307664 |
| 11/29/2013 5:40 | 0 | 264.359136  | 264.3379728 | 264.337048 | 264.328664 | 264.3317664 |
| 11/29/2013 5:50 | 0 | 264.3594408 | 264.3409728 | 264.338048 | 264.331664 | 264.3327664 |
| 11/29/2013 6:00 | 0 | 264.359136  | 264.3399728 | 264.337048 | 264.331664 | 264.3307664 |
| 11/29/2013 6:10 | 0 | 264.359136  | 264.3399728 | 264.337048 | 264.332664 | 264.3307664 |
| 11/29/2013 6:20 | 0 | 264.359136  | 264.3399728 | 264.339048 | 264.332664 | 264.3307664 |
| 11/29/2013 6:30 | 0 | 264.359136  | 264.3349728 | 264.337048 | 264.330664 | 264.3287664 |
| 11/29/2013 6:40 | 0 | 264.359136  | 264.3369728 | 264.337048 | 264.331664 | 264.3297664 |
| 11/29/2013 6:50 | 0 | 264.359136  | 264.3369728 | 264.336048 | 264.329664 | 264.3287664 |
| 11/29/2013 7:00 | 0 | 264.359136  | 264.3379728 | 264.337048 | 264.329664 | 264.3307664 |
| 11/29/2013 7:10 | 0 | 264.359136  | 264.3369728 | 264.337048 | 264.329664 | 264.3297664 |
| 11/29/2013 7:20 | 0 | 264.359136  | 264.3379728 | 264.337048 | 264.326664 | 264.3297664 |
| 11/29/2013 7:30 | 0 | 264.359136  | 264.3349728 | 264.337048 | 264.324664 | 264.3297664 |
| 11/29/2013 7:40 | 0 | 264.3594408 | 264.3379728 | 264.337048 | 264.327664 | 264.3307664 |
| 11/29/2013 7:50 | 0 | 264.359136  | 264.3349728 | 264.337048 | 264.327664 | 264.3277664 |
| 11/29/2013 8:00 | 0 | 264.359136  | 264.3379728 | 264.337048 | 264.332664 | 264.3287664 |
| 11/29/2013 8:10 | 0 | 264.359136  | 264.3389728 | 264.337048 | 264.323664 | 264.3297664 |
| 11/29/2013 8:20 | 0 | 264.359136  | 264.3389728 | 264.337048 | 264.325664 | 264.3297664 |
| 11/29/2013 8:30 | 0 | 264.359136  | 264.3359728 | 264.339048 | 264.327664 | 264.3297664 |
| 11/29/2013 8:40 | 0 | 264.359136  | 264.3359728 | 264.337048 | 264.327664 | 264.3297664 |
| 11/29/2013 8:50 | 0 | 264.3588312 | 264.3389728 | 264.339048 | 264.328664 | 264.3297664 |
| 11/29/2013 9:00 | 0 | 264.359136  | 264.3379728 | 264.337048 | 264.325664 | 264.3287664 |
| 11/29/2013 9:10 | 0 | 264.359136  | 264.3379728 | 264.337048 | 264.329664 | 264.3307664 |
| 11/29/2013 9:20 | 0 | 264.359136  | 264.3399728 | 264.336048 | 264.328664 | 264.3307664 |

|                  |   |             |             |            |            |             |
|------------------|---|-------------|-------------|------------|------------|-------------|
| 11/29/2013 9:30  | 0 | 264.359136  | 264.3369728 | 264.336048 | 264.329664 | 264.3287664 |
| 11/29/2013 9:40  | 0 | 264.359136  | 264.3369728 | 264.337048 | 264.329664 | 264.3277664 |
| 11/29/2013 9:50  | 0 | 264.3588312 | 264.3379728 | 264.339048 | 264.330664 | 264.3287664 |
| 11/29/2013 10:00 | 0 | 264.3588312 | 264.3369728 | 264.336048 | 264.325664 | 264.3287664 |
| 11/29/2013 10:10 | 0 | 264.3588312 | 264.3399728 | 264.336048 | 264.327664 | 264.3287664 |
| 11/29/2013 10:20 | 0 | 264.3588312 | 264.3399728 | 264.336048 | 264.330664 | 264.3287664 |
| 11/29/2013 10:30 | 0 | 264.3588312 | 264.3409728 | 264.337048 | 264.330664 | 264.3297664 |
| 11/29/2013 10:40 | 0 | 264.3588312 | 264.3389728 | 264.340048 | 264.330664 | 264.3297664 |
| 11/29/2013 10:50 | 0 | 264.3588312 | 264.3399728 | 264.336048 | 264.327664 | 264.3307664 |
| 11/29/2013 11:00 | 0 | 264.3588312 | 264.3389728 | 264.337048 | 264.326664 | 264.3287664 |
| 11/29/2013 11:10 | 0 | 264.3585264 | 264.3389728 | 264.337048 | 264.326664 | 264.3267664 |
| 11/29/2013 11:20 | 0 | 264.3588312 | 264.3389728 | 264.336048 | 264.326664 | 264.3277664 |
| 11/29/2013 11:30 | 0 | 264.3588312 | 264.3399728 | 264.337048 | 264.324664 | 264.3297664 |
| 11/29/2013 11:40 | 0 | 264.3585264 | 264.3389728 | 264.336048 | 264.329664 | 264.3277664 |
| 11/29/2013 11:50 | 0 | 264.3585264 | 264.3399728 | 264.336048 | 264.332664 | 264.3307664 |
| 11/29/2013 12:00 | 0 | 264.3585264 | 264.3399728 | 264.338048 | 264.333664 | 264.3287664 |
| 11/29/2013 12:10 | 0 | 264.3585264 | 264.3379728 | 264.338048 | 264.334664 | 264.3297664 |
| 11/29/2013 12:20 | 0 | 264.3585264 | 264.3389728 | 264.338048 | 264.333664 | 264.3307664 |
| 11/29/2013 12:30 | 0 | 264.3585264 | 264.3389728 | 264.335048 | 264.332664 | 264.3307664 |
| 11/29/2013 12:40 | 0 | 264.3579168 | 264.3399728 | 264.337048 | 264.333664 | 264.3287664 |
| 11/29/2013 12:50 | 0 | 264.3579168 | 264.3379728 | 264.337048 | 264.334664 | 264.3287664 |
| 11/29/2013 13:00 | 0 | 264.3582216 | 264.3389728 | 264.337048 | 264.333664 | 264.3297664 |
| 11/29/2013 13:10 | 0 | 264.3582216 | 264.3389728 | 264.338048 | 264.333664 | 264.3287664 |
| 11/29/2013 13:20 | 0 | 264.3582216 | 264.3399728 | 264.338048 | 264.332664 | 264.3277664 |
| 11/29/2013 13:30 | 0 | 264.3582216 | 264.3379728 | 264.337048 | 264.332664 | 264.3277664 |
| 11/29/2013 13:40 | 0 | 264.3579168 | 264.3409728 | 264.337048 | 264.332664 | 264.3287664 |
| 11/29/2013 13:50 | 0 | 264.3579168 | 264.3419728 | 264.340048 | 264.335664 | 264.3307664 |
| 11/29/2013 14:00 | 0 | 264.3579168 | 264.3379728 | 264.337048 | 264.332664 | 264.3297664 |
| 11/29/2013 14:10 | 0 | 264.3579168 | 264.3419728 | 264.341048 | 264.337664 | 264.3317664 |
| 11/29/2013 14:20 | 0 | 264.357612  | 264.3389728 | 264.339048 | 264.336664 | 264.3297664 |
| 11/29/2013 14:30 | 0 | 264.357612  | 264.3389728 | 264.338048 | 264.335664 | 264.3317664 |
| 11/29/2013 14:40 | 0 | 264.3579168 | 264.3399728 | 264.337048 | 264.335664 | 264.3297664 |
| 11/29/2013 14:50 | 0 | 264.357612  | 264.3399728 | 264.338048 | 264.334664 | 264.3307664 |
| 11/29/2013 15:00 | 0 | 264.3573072 | 264.3379728 | 264.338048 | 264.334664 | 264.3307664 |
| 11/29/2013 15:10 | 0 | 264.3573072 | 264.3389728 | 264.337048 | 264.333664 | 264.3317664 |
| 11/29/2013 15:20 | 0 | 264.357612  | 264.3389728 | 264.338048 | 264.334664 | 264.3307664 |
| 11/29/2013 15:30 | 0 | 264.3573072 | 264.3399728 | 264.340048 | 264.337664 | 264.3317664 |
| 11/29/2013 15:40 | 0 | 264.357612  | 264.3399728 | 264.339048 | 264.334664 | 264.3297664 |
| 11/29/2013 15:50 | 0 | 264.3570024 | 264.3399728 | 264.339048 | 264.335664 | 264.3297664 |
| 11/29/2013 16:00 | 0 | 264.3573072 | 264.3409728 | 264.341048 | 264.336664 | 264.3327664 |
| 11/29/2013 16:10 | 0 | 264.357612  | 264.3389728 | 264.339048 | 264.334664 | 264.3307664 |
| 11/29/2013 16:20 | 0 | 264.357612  | 264.3389728 | 264.338048 | 264.334664 | 264.3307664 |
| 11/29/2013 16:30 | 0 | 264.3573072 | 264.3419728 | 264.339048 | 264.333664 | 264.3317664 |
| 11/29/2013 16:40 | 0 | 264.3573072 | 264.3399728 | 264.339048 | 264.335664 | 264.3317664 |
| 11/29/2013 16:50 | 0 | 264.3573072 | 264.3409728 | 264.339048 | 264.336664 | 264.3327664 |
| 11/29/2013 17:00 | 0 | 264.3573072 | 264.3399728 | 264.339048 | 264.331664 | 264.3317664 |
| 11/29/2013 17:10 | 0 | 264.357612  | 264.3399728 | 264.339048 | 264.332664 | 264.3307664 |

|                  |   |             |             |            |            |             |
|------------------|---|-------------|-------------|------------|------------|-------------|
| 11/29/2013 17:20 | 0 | 264.357612  | 264.3409728 | 264.339048 | 264.335664 | 264.3317664 |
| 11/29/2013 17:30 | 0 | 264.3573072 | 264.3389728 | 264.339048 | 264.333664 | 264.3317664 |
| 11/29/2013 17:40 | 0 | 264.357612  | 264.3409728 | 264.338048 | 264.333664 | 264.3287664 |
| 11/29/2013 17:50 | 0 | 264.357612  | 264.3399728 | 264.340048 | 264.333664 | 264.3317664 |
| 11/29/2013 18:00 | 0 | 264.357612  | 264.3399728 | 264.341048 | 264.335664 | 264.3327664 |
| 11/29/2013 18:10 | 0 | 264.357612  | 264.3369728 | 264.338048 | 264.334664 | 264.3307664 |
| 11/29/2013 18:20 | 0 | 264.357612  | 264.3379728 | 264.339048 | 264.335664 | 264.3327664 |
| 11/29/2013 18:30 | 0 | 264.357612  | 264.3409728 | 264.338048 | 264.333664 | 264.3307664 |
| 11/29/2013 18:40 | 0 | 264.357612  | 264.3359728 | 264.338048 | 264.333664 | 264.3307664 |
| 11/29/2013 18:50 | 0 | 264.357612  | 264.3369728 | 264.335048 | 264.332664 | 264.3307664 |
| 11/29/2013 19:00 | 0 | 264.3573072 | 264.3359728 | 264.337048 | 264.333664 | 264.3307664 |
| 11/29/2013 19:10 | 0 | 264.3573072 | 264.3349728 | 264.338048 | 264.331664 | 264.3287664 |
| 11/29/2013 19:20 | 0 | 264.3573072 | 264.3379728 | 264.338048 | 264.334664 | 264.3297664 |
| 11/29/2013 19:30 | 0 | 264.3573072 | 264.3349728 | 264.338048 | 264.330664 | 264.3287664 |
| 11/29/2013 19:40 | 0 | 264.3573072 | 264.3389728 | 264.339048 | 264.332664 | 264.3297664 |
| 11/29/2013 19:50 | 0 | 264.3573072 | 264.3379728 | 264.337048 | 264.333664 | 264.3287664 |
| 11/29/2013 20:00 | 0 | 264.357612  | 264.3389728 | 264.340048 | 264.334664 | 264.3317664 |
| 11/29/2013 20:10 | 0 | 264.357612  | 264.3359728 | 264.337048 | 264.334664 | 264.3297664 |
| 11/29/2013 20:20 | 0 | 264.3573072 | 264.3379728 | 264.337048 | 264.331664 | 264.3287664 |
| 11/29/2013 20:30 | 0 | 264.357612  | 264.3389728 | 264.337048 | 264.334664 | 264.3297664 |
| 11/29/2013 20:40 | 0 | 264.3579168 | 264.3399728 | 264.340048 | 264.333664 | 264.3307664 |
| 11/29/2013 20:50 | 0 | 264.357612  | 264.3399728 | 264.338048 | 264.332664 | 264.3297664 |
| 11/29/2013 21:00 | 0 | 264.357612  | 264.3399728 | 264.338048 | 264.334664 | 264.3307664 |
| 11/29/2013 21:10 | 0 | 264.357612  | 264.3389728 | 264.338048 | 264.332664 | 264.3327664 |
| 11/29/2013 21:20 | 0 | 264.3579168 | 264.3399728 | 264.338048 | 264.331664 | 264.3307664 |
| 11/29/2013 21:30 | 0 | 264.357612  | 264.3379728 | 264.338048 | 264.331664 | 264.3307664 |
| 11/29/2013 21:40 | 0 | 264.357612  | 264.3399728 | 264.340048 | 264.331664 | 264.3287664 |
| 11/29/2013 21:50 | 0 | 264.357612  | 264.3399728 | 264.340048 | 264.335664 | 264.3327664 |
| 11/29/2013 22:00 | 0 | 264.357612  | 264.3379728 | 264.338048 | 264.331664 | 264.3307664 |
| 11/29/2013 22:10 | 0 | 264.3573072 | 264.3389728 | 264.340048 | 264.334664 | 264.3317664 |
| 11/29/2013 22:20 | 0 | 264.3573072 | 264.3399728 | 264.339048 | 264.334664 | 264.3317664 |
| 11/29/2013 22:30 | 0 | 264.3573072 | 264.3379728 | 264.337048 | 264.333664 | 264.3297664 |
| 11/29/2013 22:40 | 0 | 264.3573072 | 264.3379728 | 264.339048 | 264.333664 | 264.3317664 |
| 11/29/2013 22:50 | 0 | 264.3573072 | 264.3429728 | 264.340048 | 264.336664 | 264.3327664 |
| 11/29/2013 23:00 | 0 | 264.357612  | 264.3389728 | 264.340048 | 264.330664 | 264.3297664 |
| 11/29/2013 23:10 | 0 | 264.357612  | 264.3389728 | 264.339048 | 264.330664 | 264.3317664 |
| 11/29/2013 23:20 | 0 | 264.357612  | 264.3389728 | 264.339048 | 264.334664 | 264.3307664 |
| 11/29/2013 23:30 | 0 | 264.3579168 | 264.3389728 | 264.339048 | 264.331664 | 264.3287664 |
| 11/29/2013 23:40 | 0 | 264.357612  | 264.3389728 | 264.339048 | 264.332664 | 264.3297664 |
| 11/29/2013 23:50 | 0 | 264.3579168 | 264.3409728 | 264.339048 | 264.333664 | 264.3307664 |
| 11/30/2013 0:00  | 0 | 264.3579168 | 264.3409728 | 264.339048 | 264.331664 | 264.3287664 |
| 11/30/2013 0:10  | 0 | 264.3579168 | 264.3389728 | 264.339048 | 264.333664 | 264.3287664 |
| 11/30/2013 0:20  | 0 | 264.3579168 | 264.3389728 | 264.339048 | 264.332664 | 264.3307664 |
| 11/30/2013 0:30  | 0 | 264.3579168 | 264.3399728 | 264.339048 | 264.332664 | 264.3297664 |
| 11/30/2013 0:40  | 0 | 264.3579168 | 264.3399728 | 264.338048 | 264.330664 | 264.3317664 |
| 11/30/2013 0:50  | 0 | 264.357612  | 264.3369728 | 264.336048 | 264.330664 | 264.3297664 |
| 11/30/2013 1:00  | 0 | 264.357612  | 264.3389728 | 264.339048 | 264.331664 | 264.3307664 |



|                 |   |             |             |            |            |             |
|-----------------|---|-------------|-------------|------------|------------|-------------|
| 11/30/2013 1:10 | 0 | 264.3579168 | 264.3389728 | 264.339048 | 264.331664 | 264.3327664 |
| 11/30/2013 1:20 | 0 | 264.3579168 | 264.3399728 | 264.339048 | 264.334664 | 264.3337664 |
| 11/30/2013 1:30 | 0 | 264.3579168 | 264.3399728 | 264.342048 | 264.333664 | 264.3327664 |
| 11/30/2013 1:40 | 0 | 264.3582216 | 264.3379728 | 264.338048 | 264.330664 | 264.3317664 |
| 11/30/2013 1:50 | 0 | 264.3579168 | 264.3409728 | 264.341048 | 264.334664 | 264.3337664 |
| 11/30/2013 2:00 | 0 | 264.3579168 | 264.3389728 | 264.341048 | 264.330664 | 264.3327664 |
| 11/30/2013 2:10 | 0 | 264.3582216 | 264.3389728 | 264.338048 | 264.332664 | 264.3307664 |
| 11/30/2013 2:20 | 0 | 264.3582216 | 264.3439728 | 264.341048 | 264.333664 | 264.3347664 |
| 11/30/2013 2:30 | 0 | 264.3582216 | 264.3419728 | 264.341048 | 264.333664 | 264.3327664 |
| 11/30/2013 2:40 | 0 | 264.3582216 | 264.3419728 | 264.340048 | 264.333664 | 264.3317664 |
| 11/30/2013 2:50 | 0 | 264.3579168 | 264.3419728 | 264.342048 | 264.331664 | 264.3327664 |
| 11/30/2013 3:00 | 0 | 264.3582216 | 264.3399728 | 264.340048 | 264.334664 | 264.3327664 |
| 11/30/2013 3:10 | 0 | 264.3582216 | 264.3409728 | 264.340048 | 264.331664 | 264.3327664 |
| 11/30/2013 3:20 | 0 | 264.3579168 | 264.3379728 | 264.338048 | 264.331664 | 264.3327664 |
| 11/30/2013 3:30 | 0 | 264.3579168 | 264.3379728 | 264.338048 | 264.332664 | 264.3307664 |
| 11/30/2013 3:40 | 0 | 264.3579168 | 264.3379728 | 264.340048 | 264.332664 | 264.3317664 |
| 11/30/2013 3:50 | 0 | 264.3582216 | 264.3379728 | 264.338048 | 264.331664 | 264.3317664 |
| 11/30/2013 4:00 | 0 | 264.3579168 | 264.3389728 | 264.340048 | 264.331664 | 264.3297664 |
| 11/30/2013 4:10 | 0 | 264.3582216 | 264.3399728 | 264.341048 | 264.331664 | 264.3327664 |
| 11/30/2013 4:20 | 0 | 264.3582216 | 264.3399728 | 264.341048 | 264.332664 | 264.3307664 |
| 11/30/2013 4:30 | 0 | 264.3582216 | 264.3399728 | 264.341048 | 264.334664 | 264.3337664 |
| 11/30/2013 4:40 | 0 | 264.3582216 | 264.3379728 | 264.339048 | 264.332664 | 264.3307664 |
| 11/30/2013 4:50 | 0 | 264.3582216 | 264.3359728 | 264.339048 | 264.332664 | 264.3317664 |
| 11/30/2013 5:00 | 0 | 264.3579168 | 264.3409728 | 264.340048 | 264.333664 | 264.3317664 |
| 11/30/2013 5:10 | 0 | 264.3579168 | 264.3409728 | 264.340048 | 264.334664 | 264.3347664 |
| 11/30/2013 5:20 | 0 | 264.3579168 | 264.3399728 | 264.339048 | 264.333664 | 264.3297664 |
| 11/30/2013 5:30 | 0 | 264.3582216 | 264.3389728 | 264.339048 | 264.333664 | 264.3317664 |
| 11/30/2013 5:40 | 0 | 264.3579168 | 264.3379728 | 264.339048 | 264.331664 | 264.3317664 |
| 11/30/2013 5:50 | 0 | 264.3579168 | 264.3359728 | 264.339048 | 264.331664 | 264.3297664 |
| 11/30/2013 6:00 | 0 | 264.3582216 | 264.3399728 | 264.342048 | 264.332664 | 264.3337664 |
| 11/30/2013 6:10 | 0 | 264.3579168 | 264.3389728 | 264.341048 | 264.334664 | 264.3287664 |
| 11/30/2013 6:20 | 0 | 264.3579168 | 264.3389728 | 264.342048 | 264.333664 | 264.3327664 |
| 11/30/2013 6:30 | 0 | 264.3579168 | 264.3389728 | 264.339048 | 264.333664 | 264.3307664 |
| 11/30/2013 6:40 | 0 | 264.3579168 | 264.3369728 | 264.338048 | 264.330664 | 264.3307664 |
| 11/30/2013 6:50 | 0 | 264.3582216 | 264.3409728 | 264.338048 | 264.332664 | 264.3287664 |
| 11/30/2013 7:00 | 0 | 264.3579168 | 264.3399728 | 264.339048 | 264.333664 | 264.3297664 |
| 11/30/2013 7:10 | 0 | 264.3579168 | 264.3389728 | 264.339048 | 264.333664 | 264.3297664 |
| 11/30/2013 7:20 | 0 | 264.3579168 | 264.3379728 | 264.341048 | 264.331664 | 264.3337664 |
| 11/30/2013 7:30 | 0 | 264.3579168 | 264.3389728 | 264.340048 | 264.333664 | 264.3317664 |
| 11/30/2013 7:40 | 0 | 264.3579168 | 264.3379728 | 264.339048 | 264.333664 | 264.3317664 |
| 11/30/2013 7:50 | 0 | 264.3582216 | 264.3409728 | 264.341048 | 264.332664 | 264.3317664 |
| 11/30/2013 8:00 | 0 | 264.3579168 | 264.3399728 | 264.338048 | 264.333664 | 264.3317664 |
| 11/30/2013 8:10 | 0 | 264.3579168 | 264.3379728 | 264.339048 | 264.335664 | 264.3317664 |
| 11/30/2013 8:20 | 0 | 264.357612  | 264.3369728 | 264.339048 | 264.331664 | 264.3297664 |
| 11/30/2013 8:30 | 0 | 264.3579168 | 264.3389728 | 264.339048 | 264.332664 | 264.3307664 |
| 11/30/2013 8:40 | 0 | 264.3579168 | 264.3389728 | 264.338048 | 264.330664 | 264.3307664 |
| 11/30/2013 8:50 | 0 | 264.3579168 | 264.3399728 | 264.339048 | 264.333664 | 264.3317664 |

|                  |   |             |             |            |            |             |
|------------------|---|-------------|-------------|------------|------------|-------------|
| 11/30/2013 9:00  | 0 | 264.3579168 | 264.3379728 | 264.341048 | 264.333664 | 264.3337664 |
| 11/30/2013 9:10  | 0 | 264.3579168 | 264.3389728 | 264.338048 | 264.331664 | 264.3297664 |
| 11/30/2013 9:20  | 0 | 264.3579168 | 264.3389728 | 264.338048 | 264.330664 | 264.3307664 |
| 11/30/2013 9:30  | 0 | 264.357612  | 264.3389728 | 264.339048 | 264.330664 | 264.3307664 |
| 11/30/2013 9:40  | 0 | 264.357612  | 264.3389728 | 264.338048 | 264.331664 | 264.3307664 |
| 11/30/2013 9:50  | 0 | 264.357612  | 264.3399728 | 264.341048 | 264.333664 | 264.3317664 |
| 11/30/2013 10:00 | 0 | 264.357612  | 264.3369728 | 264.338048 | 264.330664 | 264.3307664 |
| 11/30/2013 10:10 | 0 | 264.3573072 | 264.3359728 | 264.338048 | 264.330664 | 264.3277664 |
| 11/30/2013 10:20 | 0 | 264.3573072 | 264.3389728 | 264.339048 | 264.332664 | 264.3307664 |
| 11/30/2013 10:30 | 0 | 264.3573072 | 264.3369728 | 264.339048 | 264.335664 | 264.3317664 |
| 11/30/2013 10:40 | 0 | 264.3573072 | 264.3359728 | 264.338048 | 264.332664 | 264.3287664 |
| 11/30/2013 10:50 | 0 | 264.3573072 | 264.3389728 | 264.339048 | 264.333664 | 264.3317664 |
| 11/30/2013 11:00 | 0 | 264.3570024 | 264.3389728 | 264.339048 | 264.333664 | 264.3297664 |
| 11/30/2013 11:10 | 0 | 264.3570024 | 264.3389728 | 264.339048 | 264.332664 | 264.3287664 |
| 11/30/2013 11:20 | 0 | 264.3570024 | 264.3369728 | 264.336048 | 264.332664 | 264.3307664 |
| 11/30/2013 11:30 | 0 | 264.3570024 | 264.3389728 | 264.338048 | 264.333664 | 264.3297664 |
| 11/30/2013 11:40 | 0 | 264.3570024 | 264.3369728 | 264.336048 | 264.328664 | 264.3287664 |
| 11/30/2013 11:50 | 0 | 264.3570024 | 264.3369728 | 264.339048 | 264.331664 | 264.3317664 |
| 11/30/2013 12:00 | 0 | 264.3566976 | 264.3379728 | 264.339048 | 264.330664 | 264.3307664 |
| 11/30/2013 12:10 | 0 | 264.3570024 | 264.3359728 | 264.338048 | 264.330664 | 264.3307664 |
| 11/30/2013 12:20 | 0 | 264.3566976 | 264.3369728 | 264.339048 | 264.333664 | 264.3317664 |
| 11/30/2013 12:30 | 0 | 264.3570024 | 264.3359728 | 264.338048 | 264.331664 | 264.3287664 |
| 11/30/2013 12:40 | 0 | 264.3570024 | 264.3369728 | 264.338048 | 264.333664 | 264.3317664 |
| 11/30/2013 12:50 | 0 | 264.3570024 | 264.3369728 | 264.338048 | 264.332664 | 264.3317664 |
| 11/30/2013 13:00 | 0 | 264.3570024 | 264.3349728 | 264.337048 | 264.329664 | 264.3277664 |
| 11/30/2013 13:10 | 0 | 264.3570024 | 264.3349728 | 264.338048 | 264.332664 | 264.3277664 |
| 11/30/2013 13:20 | 0 | 264.3570024 | 264.3359728 | 264.337048 | 264.331664 | 264.3307664 |
| 11/30/2013 13:30 | 0 | 264.3566976 | 264.3359728 | 264.338048 | 264.333664 | 264.3307664 |
| 11/30/2013 13:40 | 0 | 264.3566976 | 264.3359728 | 264.338048 | 264.333664 | 264.3307664 |
| 11/30/2013 13:50 | 0 | 264.3570024 | 264.3359728 | 264.338048 | 264.331664 | 264.3297664 |
| 11/30/2013 14:00 | 0 | 264.3570024 | 264.3349728 | 264.336048 | 264.330664 | 264.3287664 |
| 11/30/2013 14:10 | 0 | 264.3570024 | 264.3339728 | 264.337048 | 264.331664 | 264.3287664 |
| 11/30/2013 14:20 | 0 | 264.3570024 | 264.3359728 | 264.339048 | 264.330664 | 264.3297664 |
| 11/30/2013 14:30 | 0 | 264.3570024 | 264.3379728 | 264.339048 | 264.332664 | 264.3307664 |
| 11/30/2013 14:40 | 0 | 264.3573072 | 264.3369728 | 264.341048 | 264.331664 | 264.3287664 |
| 11/30/2013 14:50 | 0 | 264.3573072 | 264.3379728 | 264.339048 | 264.333664 | 264.3287664 |
| 11/30/2013 15:00 | 0 | 264.3573072 | 264.3369728 | 264.339048 | 264.332664 | 264.3307664 |
| 11/30/2013 15:10 | 0 | 264.3570024 | 264.3379728 | 264.339048 | 264.331664 | 264.3307664 |
| 11/30/2013 15:20 | 0 | 264.357612  | 264.3379728 | 264.339048 | 264.335664 | 264.3327664 |
| 11/30/2013 15:30 | 0 | 264.3573072 | 264.3369728 | 264.339048 | 264.330664 | 264.3307664 |
| 11/30/2013 15:40 | 0 | 264.3573072 | 264.3379728 | 264.339048 | 264.333664 | 264.3307664 |
| 11/30/2013 15:50 | 0 | 264.3573072 | 264.3379728 | 264.339048 | 264.332664 | 264.3307664 |
| 11/30/2013 16:00 | 0 | 264.357612  | 264.3379728 | 264.339048 | 264.332664 | 264.3327664 |
| 11/30/2013 16:10 | 0 | 264.357612  | 264.3399728 | 264.340048 | 264.333664 | 264.3327664 |
| 11/30/2013 16:20 | 0 | 264.357612  | 264.3379728 | 264.340048 | 264.331664 | 264.3307664 |
| 11/30/2013 16:30 | 0 | 264.357612  | 264.3389728 | 264.339048 | 264.330664 | 264.3307664 |
| 11/30/2013 16:40 | 0 | 264.357612  | 264.3389728 | 264.339048 | 264.332664 | 264.3297664 |

|                  |   |             |             |            |            |             |
|------------------|---|-------------|-------------|------------|------------|-------------|
| 11/30/2013 16:50 | 0 | 264.357612  | 264.3389728 | 264.339048 | 264.330664 | 264.3297664 |
| 11/30/2013 17:00 | 0 | 264.357612  | 264.3389728 | 264.338048 | 264.330664 | 264.3297664 |
| 11/30/2013 17:10 | 0 | 264.3579168 | 264.3379728 | 264.339048 | 264.329664 | 264.3287664 |
| 11/30/2013 17:20 | 0 | 264.3579168 | 264.3409728 | 264.342048 | 264.331664 | 264.3327664 |
| 11/30/2013 17:30 | 0 | 264.3579168 | 264.3379728 | 264.340048 | 264.328664 | 264.3307664 |
| 11/30/2013 17:40 | 0 | 264.3582216 | 264.3379728 | 264.337048 | 264.333664 | 264.3307664 |
| 11/30/2013 17:50 | 0 | 264.3582216 | 264.3409728 | 264.339048 | 264.331664 | 264.3307664 |
| 11/30/2013 18:00 | 0 | 264.3582216 | 264.3409728 | 264.341048 | 264.329664 | 264.3297664 |
| 11/30/2013 18:10 | 0 | 264.3585264 | 264.3409728 | 264.340048 | 264.330664 | 264.3307664 |
| 11/30/2013 18:20 | 0 | 264.3585264 | 264.3409728 | 264.340048 | 264.330664 | 264.3307664 |
| 11/30/2013 18:30 | 0 | 264.3588312 | 264.3429728 | 264.343048 | 264.333664 | 264.3337664 |
| 11/30/2013 18:40 | 0 | 264.3588312 | 264.3419728 | 264.340048 | 264.332664 | 264.3317664 |
| 11/30/2013 18:50 | 0 | 264.3588312 | 264.3399728 | 264.341048 | 264.331664 | 264.3297664 |
| 11/30/2013 19:00 | 0 | 264.3588312 | 264.3429728 | 264.343048 | 264.332664 | 264.3327664 |
| 11/30/2013 19:10 | 0 | 264.359136  | 264.3419728 | 264.340048 | 264.329664 | 264.3317664 |
| 11/30/2013 19:20 | 0 | 264.359136  | 264.3439728 | 264.343048 | 264.331664 | 264.3367664 |
| 11/30/2013 19:30 | 0 | 264.359136  | 264.3439728 | 264.343048 | 264.333664 | 264.3337664 |
| 11/30/2013 19:40 | 0 | 264.3594408 | 264.3439728 | 264.341048 | 264.331664 | 264.3307664 |
| 11/30/2013 19:50 | 0 | 264.3594408 | 264.3429728 | 264.341048 | 264.330664 | 264.3317664 |
| 11/30/2013 20:00 | 0 | 264.3594408 | 264.3429728 | 264.341048 | 264.332664 | 264.3317664 |
| 11/30/2013 20:10 | 0 | 264.3594408 | 264.3409728 | 264.341048 | 264.330664 | 264.3327664 |
| 11/30/2013 20:20 | 0 | 264.3594408 | 264.3439728 | 264.344048 | 264.332664 | 264.3337664 |
| 11/30/2013 20:30 | 0 | 264.3597456 | 264.3429728 | 264.343048 | 264.332664 | 264.3317664 |
| 11/30/2013 20:40 | 0 | 264.3597456 | 264.3439728 | 264.343048 | 264.331664 | 264.3337664 |
| 11/30/2013 20:50 | 0 | 264.3597456 | 264.3439728 | 264.343048 | 264.333664 | 264.3317664 |
| 11/30/2013 21:00 | 0 | 264.3594408 | 264.3439728 | 264.341048 | 264.331664 | 264.3337664 |
| 11/30/2013 21:10 | 0 | 264.3597456 | 264.3429728 | 264.343048 | 264.332664 | 264.3317664 |
| 11/30/2013 21:20 | 0 | 264.3597456 | 264.3459728 | 264.344048 | 264.332664 | 264.3317664 |
| 11/30/2013 21:30 | 0 | 264.3597456 | 264.3459728 | 264.342048 | 264.332664 | 264.3307664 |
| 11/30/2013 21:40 | 0 | 264.3597456 | 264.3429728 | 264.341048 | 264.331664 | 264.3327664 |
| 11/30/2013 21:50 | 0 | 264.3597456 | 264.3429728 | 264.344048 | 264.332664 | 264.3327664 |
| 11/30/2013 22:00 | 0 | 264.3600504 | 264.3429728 | 264.342048 | 264.331664 | 264.3327664 |
| 11/30/2013 22:10 | 0 | 264.3597456 | 264.3429728 | 264.341048 | 264.330664 | 264.3317664 |
| 11/30/2013 22:20 | 0 | 264.3600504 | 264.3449728 | 264.344048 | 264.335664 | 264.3327664 |
| 11/30/2013 22:30 | 0 | 264.3600504 | 264.3399728 | 264.341048 | 264.330664 | 264.3317664 |
| 11/30/2013 22:40 | 0 | 264.3600504 | 264.3419728 | 264.341048 | 264.332664 | 264.3317664 |
| 11/30/2013 22:50 | 0 | 264.3597456 | 264.3439728 | 264.339048 | 264.330664 | 264.3317664 |
| 11/30/2013 23:00 | 0 | 264.3597456 | 264.3449728 | 264.344048 | 264.335664 | 264.3327664 |
| 11/30/2013 23:10 | 0 | 264.3597456 | 264.3419728 | 264.342048 | 264.330664 | 264.3317664 |
| 11/30/2013 23:20 | 0 | 264.3597456 | 264.3419728 | 264.342048 | 264.334664 | 264.3307664 |
| 11/30/2013 23:30 | 0 | 264.3600504 | 264.3439728 | 264.344048 | 264.332664 | 264.3337664 |
| 11/30/2013 23:40 | 0 | 264.3600504 | 264.3459728 | 264.345048 | 264.332664 | 264.3357664 |
| 11/30/2013 23:50 | 0 | 264.3600504 | 264.3429728 | 264.341048 | 264.331664 | 264.3307664 |
| 12/1/2013 0:00   | 0 | 264.3597456 | 264.3429728 | 264.344048 | 264.331664 | 264.3347664 |

| D10LBT1R3  | D10LBT1R4   | D10LBT1R5   | D10LBT2R2  | D10LBT3R2   | D330LB      | D2900LB     |
|------------|-------------|-------------|------------|-------------|-------------|-------------|
| 264.403232 | 264.4048688 | 264.3680528 | 264.391136 | 264.3885264 | 264.1334192 | 261.1488824 |
| 264.403232 | 264.4078688 | 264.3700528 | 264.393136 | 264.3885264 | 264.1334192 | 261.1518824 |
| 264.403232 | 264.4048688 | 264.3680528 | 264.391136 | 264.3885264 | 264.1324192 | 261.1508824 |
| 264.403232 | 264.4058688 | 264.3680528 | 264.393136 | 264.3885264 | 264.1324192 | 261.1508824 |
| 264.401232 | 264.4058688 | 264.3720528 | 264.393136 | 264.3885264 | 264.1334192 | 261.1508824 |
| 264.400232 | 264.4018688 | 264.3690528 | 264.390136 | 264.3855264 | 264.1324192 | 261.1508824 |
| 264.400232 | 264.4028688 | 264.3700528 | 264.390136 | 264.3855264 | 264.1304192 | 261.1528824 |
| 264.398232 | 264.4028688 | 264.3720528 | 264.388136 | 264.3835264 | 264.1324192 | 261.1508824 |
| 264.397232 | 264.4028688 | 264.3730528 | 264.388136 | 264.3835264 | 264.1314192 | 261.1518824 |
| 264.396232 | 264.3998688 | 264.3720528 | 264.386136 | 264.3805264 | 264.1284192 | 261.1528824 |
| 264.396232 | 264.3998688 | 264.3710528 | 264.383136 | 264.3825264 | 264.1294192 | 261.1508824 |
| 264.395232 | 264.3988688 | 264.3720528 | 264.385136 | 264.3785264 | 264.1234192 | 261.1508824 |
| 264.395232 | 264.3988688 | 264.3710528 | 264.385136 | 264.3805264 | 264.1274192 | 261.1548824 |
| 264.393232 | 264.3988688 | 264.3720528 | 264.382136 | 264.3765264 | 264.1234192 | 261.1528824 |
| 264.393232 | 264.3968688 | 264.3710528 | 264.382136 | 264.3755264 | 264.1214192 | 261.1548824 |
| 264.389232 | 264.3948688 | 264.3710528 | 264.380136 | 264.3735264 | 264.1214192 | 261.1508824 |
| 264.389232 | 264.3938688 | 264.3690528 | 264.380136 | 264.3755264 | 264.1184192 | 261.1508824 |
| 264.389232 | 264.3938688 | 264.3720528 | 264.377136 | 264.3695264 | 264.1214192 | 261.1538824 |
| 264.385232 | 264.3908688 | 264.3680528 | 264.377136 | 264.3695264 | 264.1174192 | 261.1508824 |
| 264.385232 | 264.3918688 | 264.3700528 | 264.375136 | 264.3685264 | 264.1174192 | 261.1528824 |
| 264.386232 | 264.3888688 | 264.3690528 | 264.374136 | 264.3685264 | 264.1124192 | 261.1528824 |
| 264.385232 | 264.3868688 | 264.3720528 | 264.372136 | 264.3665264 | 264.1124192 | 261.1508824 |
| 264.382232 | 264.3878688 | 264.3690528 | 264.370136 | 264.3635264 | 264.1094192 | 261.1498824 |
| 264.382232 | 264.3858688 | 264.3700528 | 264.370136 | 264.3665264 | 264.1124192 | 261.1508824 |
| 264.380232 | 264.3848688 | 264.3670528 | 264.367136 | 264.3595264 | 264.1114192 | 261.1478824 |
| 264.380232 | 264.3838688 | 264.3680528 | 264.368136 | 264.3625264 | 264.1104192 | 261.1508824 |
| 264.380232 | 264.3828688 | 264.3670528 | 264.367136 | 264.3615264 | 264.1054192 | 261.1508824 |
| 264.381232 | 264.3828688 | 264.3670528 | 264.366136 | 264.3585264 | 264.1074192 | 261.1518824 |
| 264.377232 | 264.3818688 | 264.3660528 | 264.364136 | 264.3605264 | 264.1064192 | 261.1468824 |
| 264.377232 | 264.3818688 | 264.3680528 | 264.366136 | 264.3585264 | 264.1064192 | 261.1478824 |
| 264.376232 | 264.3818688 | 264.3670528 | 264.365136 | 264.3575264 | 264.1034192 | 261.1458824 |
| 264.374232 | 264.3778688 | 264.3660528 | 264.361136 | 264.3555264 | 264.1054192 | 261.1448824 |
| 264.375232 | 264.3778688 | 264.3640528 | 264.363136 | 264.3565264 | 264.1024192 | 261.1438824 |
| 264.375232 | 264.3778688 | 264.3650528 | 264.361136 | 264.3555264 | 264.1034192 | 261.1448824 |
| 264.373232 | 264.3778688 | 264.3630528 | 264.361136 | 264.3555264 | 264.1034192 | 261.1438824 |
| 264.371232 | 264.3768688 | 264.3610528 | 264.359136 | 264.3525264 | 264.1004192 | 261.1418824 |
| 264.373232 | 264.3778688 | 264.3650528 | 264.361136 | 264.3555264 | 264.1014192 | 261.1428824 |
| 264.373232 | 264.3768688 | 264.3610528 | 264.361136 | 264.3555264 | 264.1024192 | 261.1438824 |
| 264.373232 | 264.3778688 | 264.3630528 | 264.361136 | 264.3555264 | 264.1014192 | 261.1418824 |
| 264.373232 | 264.3768688 | 264.3620528 | 264.359136 | 264.3545264 | 264.1004192 | 261.1418824 |
| 264.373232 | 264.3768688 | 264.3630528 | 264.359136 | 264.3545264 | 264.0984192 | 261.1398824 |
| 264.374232 | 264.3778688 | 264.3630528 | 264.361136 | 264.3555264 | 264.0994192 | 261.1418824 |
| 264.373232 | 264.3778688 | 264.3640528 | 264.361136 | 264.3545264 | 264.1004192 | 261.1338824 |
| 264.378232 | 264.3798688 | 264.3630528 | 264.364136 | 264.3595264 | 264.1034192 | 261.1398824 |
| 264.377232 | 264.3788688 | 264.3620528 | 264.365136 | 264.3585264 | 264.1044192 | 261.1378824 |
| 264.379232 | 264.3818688 | 264.3630528 | 264.368136 | 264.3615264 | 264.1084192 | 261.1378824 |

|            |             |             |            |             |             |             |
|------------|-------------|-------------|------------|-------------|-------------|-------------|
| 264.379232 | 264.3818688 | 264.3610528 | 264.368136 | 264.3615264 | 264.1084192 | 261.1378824 |
| 264.380232 | 264.3838688 | 264.3610528 | 264.368136 | 264.3605264 | 264.1104192 | 261.1348824 |
| 264.383232 | 264.3848688 | 264.3610528 | 264.372136 | 264.3635264 | 264.1104192 | 261.1358824 |
| 264.384232 | 264.3838688 | 264.3600528 | 264.372136 | 264.3675264 | 264.1144192 | 261.1348824 |
| 264.386232 | 264.3858688 | 264.3620528 | 264.376136 | 264.3695264 | 264.1194192 | 261.1348824 |
| 264.389232 | 264.3888688 | 264.3640528 | 264.377136 | 264.3705264 | 264.1214192 | 261.1358824 |
| 264.391232 | 264.3908688 | 264.3650528 | 264.379136 | 264.3745264 | 264.1234192 | 261.1328824 |
| 264.395232 | 264.3938688 | 264.3630528 | 264.381136 | 264.3775264 | 264.1274192 | 261.1328824 |
| 264.398232 | 264.3968688 | 264.3650528 | 264.386136 | 264.3795264 | 264.1324192 | 261.1338824 |
| 264.397232 | 264.3958688 | 264.3640528 | 264.386136 | 264.3795264 | 264.1294192 | 261.1308824 |
| 264.399232 | 264.3958688 | 264.3620528 | 264.386136 | 264.3795264 | 264.1334192 | 261.1298824 |
| 264.399232 | 264.3978688 | 264.3660528 | 264.390136 | 264.3835264 | 264.1354192 | 261.1298824 |
| 264.402232 | 264.3988688 | 264.3630528 | 264.391136 | 264.3835264 | 264.1344192 | 261.1288824 |
| 264.401232 | 264.3988688 | 264.3640528 | 264.390136 | 264.3835264 | 264.1354192 | 261.1298824 |
| 264.400232 | 264.3988688 | 264.3630528 | 264.390136 | 264.3855264 | 264.1364192 | 261.1268824 |
| 264.403232 | 264.4008688 | 264.3650528 | 264.392136 | 264.3875264 | 264.1364192 | 261.1288824 |
| 264.405232 | 264.4028688 | 264.3680528 | 264.393136 | 264.3885264 | 264.1394192 | 261.1298824 |
| 264.407232 | 264.4028688 | 264.3650528 | 264.393136 | 264.3885264 | 264.1374192 | 261.1308824 |
| 264.402232 | 264.4008688 | 264.3650528 | 264.392136 | 264.3865264 | 264.1374192 | 261.1308824 |
| 264.404232 | 264.4008688 | 264.3650528 | 264.392136 | 264.3885264 | 264.1384192 | 261.1328824 |
| 264.401232 | 264.3998688 | 264.3640528 | 264.392136 | 264.3865264 | 264.1394192 | 261.1308824 |
| 264.402232 | 264.4008688 | 264.3640528 | 264.392136 | 264.3885264 | 264.1424192 | 261.1358824 |
| 264.400232 | 264.3988688 | 264.3610528 | 264.389136 | 264.3855264 | 264.1374192 | 261.1348824 |
| 264.401232 | 264.3998688 | 264.3640528 | 264.392136 | 264.3865264 | 264.1374192 | 261.1378824 |
| 264.401232 | 264.3988688 | 264.3610528 | 264.389136 | 264.3865264 | 264.1344192 | 261.1378824 |
| 264.402232 | 264.3998688 | 264.3610528 | 264.389136 | 264.3865264 | 264.1364192 | 261.1388824 |
| 264.398232 | 264.3958688 | 264.3590528 | 264.388136 | 264.3835264 | 264.1324192 | 261.1398824 |
| 264.398232 | 264.3948688 | 264.3610528 | 264.388136 | 264.3835264 | 264.1324192 | 261.1428824 |
| 264.398232 | 264.3948688 | 264.3610528 | 264.386136 | 264.3835264 | 264.1324192 | 261.1428824 |
| 264.395232 | 264.3938688 | 264.3590528 | 264.386136 | 264.3815264 | 264.1314192 | 261.1428824 |
| 264.396232 | 264.3938688 | 264.3600528 | 264.387136 | 264.3835264 | 264.1324192 | 261.1468824 |
| 264.394232 | 264.3918688 | 264.3590528 | 264.384136 | 264.3785264 | 264.1304192 | 261.1458824 |
| 264.393232 | 264.3918688 | 264.3570528 | 264.383136 | 264.3805264 | 264.1274192 | 261.1458824 |
| 264.391232 | 264.3888688 | 264.3540528 | 264.381136 | 264.3785264 | 264.1254192 | 261.1448824 |
| 264.391232 | 264.3888688 | 264.3560528 | 264.380136 | 264.3765264 | 264.1274192 | 261.1438824 |
| 264.392232 | 264.3888688 | 264.3550528 | 264.381136 | 264.3785264 | 264.1264192 | 261.1458824 |
| 264.388232 | 264.3888688 | 264.3530528 | 264.379136 | 264.3765264 | 264.1244192 | 261.1438824 |
| 264.388232 | 264.3858688 | 264.3520528 | 264.379136 | 264.3745264 | 264.1244192 | 261.1458824 |
| 264.390232 | 264.3888688 | 264.3550528 | 264.378136 | 264.3745264 | 264.1244192 | 261.1468824 |
| 264.389232 | 264.3898688 | 264.3530528 | 264.379136 | 264.3745264 | 264.1234192 | 261.1478824 |
| 264.388232 | 264.3868688 | 264.3530528 | 264.379136 | 264.3735264 | 264.1234192 | 261.1448824 |
| 264.384232 | 264.3838688 | 264.3500528 | 264.376136 | 264.3705264 | 264.1204192 | 261.1438824 |
| 264.386232 | 264.3838688 | 264.3510528 | 264.376136 | 264.3705264 | 264.1224192 | 261.1448824 |
| 264.384232 | 264.3808688 | 264.3480528 | 264.373136 | 264.3695264 | 264.1204192 | 261.1438824 |
| 264.384232 | 264.3818688 | 264.3510528 | 264.374136 | 264.3725264 | 264.1204192 | 261.1438824 |
| 264.384232 | 264.3808688 | 264.3510528 | 264.374136 | 264.3685264 | 264.1204192 | 261.1438824 |
| 264.382232 | 264.3808688 | 264.3510528 | 264.372136 | 264.3685264 | 264.1184192 | 261.1448824 |

|            |             |             |            |             |             |             |
|------------|-------------|-------------|------------|-------------|-------------|-------------|
| 264.384232 | 264.3808688 | 264.3490528 | 264.374136 | 264.3685264 | 264.1184192 | 261.1438824 |
| 264.382232 | 264.3818688 | 264.3470528 | 264.374136 | 264.3705264 | 264.1184192 | 261.1438824 |
| 264.381232 | 264.3778688 | 264.3450528 | 264.370136 | 264.3655264 | 264.1154192 | 261.1408824 |
| 264.382232 | 264.3808688 | 264.3510528 | 264.372136 | 264.3685264 | 264.1164192 | 261.1438824 |
| 264.381232 | 264.3778688 | 264.3460528 | 264.369136 | 264.3655264 | 264.1154192 | 261.1418824 |
| 264.382232 | 264.3788688 | 264.3490528 | 264.371136 | 264.3685264 | 264.1164192 | 261.1438824 |
| 264.382232 | 264.3808688 | 264.3490528 | 264.372136 | 264.3665264 | 264.1164192 | 261.1438824 |
| 264.381232 | 264.3788688 | 264.3480528 | 264.371136 | 264.3675264 | 264.1174192 | 261.1408824 |
| 264.381232 | 264.3778688 | 264.3450528 | 264.370136 | 264.3655264 | 264.1154192 | 261.1418824 |
| 264.379232 | 264.3778688 | 264.3450528 | 264.370136 | 264.3655264 | 264.1154192 | 261.1388824 |
| 264.381232 | 264.3798688 | 264.3460528 | 264.370136 | 264.3655264 | 264.1154192 | 261.1418824 |
| 264.381232 | 264.3778688 | 264.3460528 | 264.370136 | 264.3655264 | 264.1174192 | 261.1418824 |
| 264.382232 | 264.3798688 | 264.3450528 | 264.370136 | 264.3645264 | 264.1164192 | 261.1408824 |
| 264.382232 | 264.3798688 | 264.3450528 | 264.368136 | 264.3645264 | 264.1164192 | 261.1438824 |
| 264.381232 | 264.3808688 | 264.3500528 | 264.371136 | 264.3675264 | 264.1174192 | 261.1458824 |
| 264.380232 | 264.3778688 | 264.3450528 | 264.368136 | 264.3645264 | 264.1144192 | 261.1428824 |
| 264.382232 | 264.3798688 | 264.3450528 | 264.370136 | 264.3665264 | 264.1184192 | 261.1438824 |
| 264.383232 | 264.3828688 | 264.3500528 | 264.371136 | 264.3675264 | 264.1194192 | 261.1468824 |
| 264.382232 | 264.3808688 | 264.3470528 | 264.371136 | 264.3675264 | 264.1184192 | 261.1458824 |
| 264.382232 | 264.3818688 | 264.3450528 | 264.372136 | 264.3665264 | 264.1164192 | 261.1448824 |
| 264.382232 | 264.3818688 | 264.3440528 | 264.372136 | 264.3685264 | 264.1184192 | 261.1448824 |
| 264.386232 | 264.3828688 | 264.3480528 | 264.372136 | 264.3665264 | 264.1184192 | 261.1428824 |
| 264.385232 | 264.3818688 | 264.3460528 | 264.371136 | 264.3675264 | 264.1174192 | 261.1448824 |
| 264.385232 | 264.3838688 | 264.3470528 | 264.371136 | 264.3675264 | 264.1194192 | 261.1448824 |
| 264.386232 | 264.3838688 | 264.3470528 | 264.373136 | 264.3695264 | 264.1184192 | 261.1418824 |
| 264.386232 | 264.3838688 | 264.3470528 | 264.373136 | 264.3695264 | 264.1204192 | 261.1428824 |
| 264.387232 | 264.3838688 | 264.3480528 | 264.373136 | 264.3685264 | 264.1214192 | 261.1428824 |
| 264.388232 | 264.3858688 | 264.3480528 | 264.375136 | 264.3725264 | 264.1224192 | 261.1428824 |
| 264.387232 | 264.3878688 | 264.3480528 | 264.377136 | 264.3725264 | 264.1214192 | 261.1428824 |
| 264.389232 | 264.3878688 | 264.3500528 | 264.375136 | 264.3745264 | 264.1234192 | 261.1448824 |
| 264.389232 | 264.3888688 | 264.3480528 | 264.377136 | 264.3745264 | 264.1254192 | 261.1448824 |
| 264.389232 | 264.3888688 | 264.3500528 | 264.379136 | 264.3745264 | 264.1274192 | 261.1428824 |
| 264.393232 | 264.3908688 | 264.3520528 | 264.380136 | 264.3755264 | 264.1274192 | 261.1428824 |
| 264.393232 | 264.3928688 | 264.3540528 | 264.382136 | 264.3775264 | 264.1274192 | 261.1458824 |
| 264.395232 | 264.3938688 | 264.3520528 | 264.382136 | 264.3785264 | 264.1274192 | 261.1468824 |
| 264.393232 | 264.3938688 | 264.3530528 | 264.382136 | 264.3785264 | 264.1244192 | 261.1418824 |
| 264.394232 | 264.3908688 | 264.3530528 | 264.382136 | 264.3785264 | 264.1284192 | 261.1438824 |
| 264.394232 | 264.3928688 | 264.3530528 | 264.384136 | 264.3805264 | 264.1324192 | 261.1438824 |
| 264.396232 | 264.3958688 | 264.3530528 | 264.384136 | 264.3825264 | 264.1304192 | 261.1458824 |
| 264.398232 | 264.3948688 | 264.3540528 | 264.384136 | 264.3825264 | 264.1304192 | 261.1438824 |
| 264.398232 | 264.3978688 | 264.3540528 | 264.386136 | 264.3845264 | 264.1304192 | 261.1458824 |
| 264.399232 | 264.3978688 | 264.3580528 | 264.387136 | 264.3835264 | 264.1334192 | 261.1468824 |
| 264.402232 | 264.3978688 | 264.3570528 | 264.389136 | 264.3845264 | 264.1324192 | 261.1458824 |
| 264.398232 | 264.3978688 | 264.3560528 | 264.388136 | 264.3845264 | 264.1314192 | 261.1438824 |
| 264.400232 | 264.3998688 | 264.3570528 | 264.389136 | 264.3845264 | 264.1324192 | 261.1458824 |
| 264.400232 | 264.4008688 | 264.3610528 | 264.391136 | 264.3865264 | 264.1364192 | 261.1458824 |
| 264.400232 | 264.3998688 | 264.3580528 | 264.390136 | 264.3865264 | 264.1334192 | 261.1458824 |

|            |             |             |            |             |             |             |
|------------|-------------|-------------|------------|-------------|-------------|-------------|
| 264.402232 | 264.4008688 | 264.3580528 | 264.391136 | 264.3885264 | 264.1354192 | 261.1478824 |
| 264.402232 | 264.4028688 | 264.3590528 | 264.391136 | 264.3895264 | 264.1364192 | 261.1488824 |
| 264.404232 | 264.4028688 | 264.3630528 | 264.394136 | 264.3915264 | 264.1364192 | 261.1518824 |
| 264.401232 | 264.4018688 | 264.3600528 | 264.391136 | 264.3865264 | 264.1354192 | 261.1498824 |
| 264.399232 | 264.3988688 | 264.3620528 | 264.388136 | 264.3855264 | 264.1344192 | 261.1498824 |
| 264.399232 | 264.3998688 | 264.3620528 | 264.388136 | 264.3855264 | 264.1354192 | 261.1498824 |
| 264.399232 | 264.3998688 | 264.3600528 | 264.388136 | 264.3835264 | 264.1324192 | 261.1498824 |
| 264.399232 | 264.3988688 | 264.3620528 | 264.387136 | 264.3835264 | 264.1324192 | 261.1518824 |
| 264.395232 | 264.3958688 | 264.3610528 | 264.384136 | 264.3795264 | 264.1294192 | 261.1498824 |
| 264.395232 | 264.3988688 | 264.3610528 | 264.386136 | 264.3825264 | 264.1294192 | 261.1518824 |
| 264.397232 | 264.3968688 | 264.3630528 | 264.384136 | 264.3795264 | 264.1294192 | 261.1518824 |
| 264.395232 | 264.3988688 | 264.3630528 | 264.384136 | 264.3795264 | 264.1274192 | 261.1548824 |
| 264.394232 | 264.3958688 | 264.3600528 | 264.380136 | 264.3775264 | 264.1264192 | 261.1518824 |
| 264.394232 | 264.3978688 | 264.3620528 | 264.381136 | 264.3775264 | 264.1244192 | 261.1558824 |
| 264.391232 | 264.3928688 | 264.3610528 | 264.378136 | 264.3755264 | 264.1224192 | 261.1548824 |
| 264.389232 | 264.3928688 | 264.3620528 | 264.377136 | 264.3735264 | 264.1234192 | 261.1548824 |
| 264.389232 | 264.3928688 | 264.3640528 | 264.377136 | 264.3755264 | 264.1234192 | 261.1548824 |
| 264.391232 | 264.3928688 | 264.3660528 | 264.378136 | 264.3755264 | 264.1194192 | 261.1558824 |
| 264.386232 | 264.3898688 | 264.3630528 | 264.375136 | 264.3705264 | 264.1174192 | 261.1558824 |
| 264.386232 | 264.3898688 | 264.3640528 | 264.374136 | 264.3705264 | 264.1204192 | 261.1548824 |
| 264.386232 | 264.3888688 | 264.3640528 | 264.371136 | 264.3675264 | 264.1154192 | 261.1548824 |
| 264.384232 | 264.3868688 | 264.3630528 | 264.372136 | 264.3675264 | 264.1154192 | 261.1558824 |
| 264.382232 | 264.3868688 | 264.3630528 | 264.369136 | 264.3655264 | 264.1114192 | 261.1548824 |
| 264.381232 | 264.3858688 | 264.3610528 | 264.369136 | 264.3635264 | 264.1114192 | 261.1528824 |
| 264.382232 | 264.3858688 | 264.3620528 | 264.367136 | 264.3655264 | 264.1134192 | 261.1558824 |
| 264.379232 | 264.3838688 | 264.3590528 | 264.367136 | 264.3615264 | 264.1094192 | 261.1548824 |
| 264.379232 | 264.3818688 | 264.3610528 | 264.367136 | 264.3605264 | 264.1114192 | 261.1508824 |
| 264.380232 | 264.3838688 | 264.3610528 | 264.369136 | 264.3635264 | 264.1074192 | 261.1528824 |
| 264.380232 | 264.3818688 | 264.3620528 | 264.367136 | 264.3635264 | 264.1074192 | 261.1508824 |
| 264.380232 | 264.3838688 | 264.3640528 | 264.367136 | 264.3615264 | 264.1104192 | 261.1558824 |
| 264.378232 | 264.3818688 | 264.3620528 | 264.366136 | 264.3595264 | 264.1074192 | 261.1508824 |
| 264.375232 | 264.3808688 | 264.3610528 | 264.364136 | 264.3585264 | 264.1064192 | 261.1498824 |
| 264.377232 | 264.3788688 | 264.3610528 | 264.364136 | 264.3585264 | 264.1064192 | 261.1508824 |
| 264.374232 | 264.3758688 | 264.3600528 | 264.363136 | 264.3555264 | 264.1044192 | 261.1498824 |
| 264.374232 | 264.3778688 | 264.3600528 | 264.361136 | 264.3535264 | 264.1044192 | 261.1478824 |
| 264.374232 | 264.3778688 | 264.3600528 | 264.358136 | 264.3555264 | 264.1044192 | 261.1478824 |
| 264.372232 | 264.3778688 | 264.3600528 | 264.360136 | 264.3535264 | 264.1034192 | 261.1478824 |
| 264.372232 | 264.3758688 | 264.3600528 | 264.361136 | 264.3525264 | 264.1034192 | 261.1478824 |
| 264.373232 | 264.3778688 | 264.3590528 | 264.361136 | 264.3555264 | 264.1004192 | 261.1498824 |
| 264.374232 | 264.3758688 | 264.3600528 | 264.361136 | 264.3535264 | 264.1014192 | 261.1498824 |
| 264.371232 | 264.3738688 | 264.3550528 | 264.360136 | 264.3525264 | 264.1004192 | 261.1438824 |
| 264.371232 | 264.3768688 | 264.3580528 | 264.360136 | 264.3525264 | 264.1014192 | 261.1448824 |
| 264.369232 | 264.3738688 | 264.3550528 | 264.358136 | 264.3525264 | 264.1004192 | 261.1438824 |
| 264.370232 | 264.3718688 | 264.3540528 | 264.357136 | 264.3485264 | 264.0974192 | 261.1428824 |
| 264.370232 | 264.3738688 | 264.3550528 | 264.360136 | 264.3495264 | 264.0984192 | 261.1428824 |
| 264.370232 | 264.3738688 | 264.3540528 | 264.357136 | 264.3495264 | 264.0994192 | 261.1378824 |
| 264.371232 | 264.3738688 | 264.3550528 | 264.360136 | 264.3525264 | 264.0984192 | 261.1408824 |

|            |             |             |            |             |             |             |
|------------|-------------|-------------|------------|-------------|-------------|-------------|
| 264.371232 | 264.3748688 | 264.3550528 | 264.360136 | 264.3515264 | 264.1004192 | 261.1388824 |
| 264.373232 | 264.3738688 | 264.3540528 | 264.362136 | 264.3545264 | 264.1024192 | 261.1378824 |
| 264.377232 | 264.3748688 | 264.3550528 | 264.365136 | 264.3585264 | 264.1024192 | 261.1388824 |
| 264.379232 | 264.3768688 | 264.3550528 | 264.365136 | 264.3585264 | 264.1064192 | 261.1378824 |
| 264.379232 | 264.3788688 | 264.3550528 | 264.367136 | 264.3615264 | 264.1094192 | 261.1378824 |
| 264.383232 | 264.3818688 | 264.3560528 | 264.368136 | 264.3615264 | 264.1114192 | 261.1398824 |
| 264.383232 | 264.3818688 | 264.3560528 | 264.372136 | 264.3655264 | 264.1134192 | 261.1378824 |
| 264.384232 | 264.3818688 | 264.3540528 | 264.372136 | 264.3655264 | 264.1154192 | 261.1348824 |
| 264.386232 | 264.3818688 | 264.3560528 | 264.373136 | 264.3665264 | 264.1154192 | 261.1348824 |
| 264.386232 | 264.3818688 | 264.3530528 | 264.374136 | 264.3675264 | 264.1204192 | 261.1308824 |
| 264.388232 | 264.3868688 | 264.3580528 | 264.380136 | 264.3735264 | 264.1224192 | 261.1348824 |
| 264.389232 | 264.3888688 | 264.3570528 | 264.379136 | 264.3725264 | 264.1234192 | 261.1308824 |
| 264.392232 | 264.3888688 | 264.3560528 | 264.380136 | 264.3755264 | 264.1264192 | 261.1338824 |
| 264.395232 | 264.3908688 | 264.3560528 | 264.383136 | 264.3755264 | 264.1284192 | 261.1298824 |
| 264.396232 | 264.3898688 | 264.3550528 | 264.385136 | 264.3765264 | 264.1274192 | 261.1288824 |
| 264.396232 | 264.3928688 | 264.3560528 | 264.386136 | 264.3795264 | 264.1304192 | 261.1288824 |
| 264.400232 | 264.3938688 | 264.3570528 | 264.388136 | 264.3835264 | 264.1354192 | 261.1298824 |
| 264.401232 | 264.3948688 | 264.3560528 | 264.388136 | 264.3845264 | 264.1354192 | 261.1278824 |
| 264.401232 | 264.3948688 | 264.3540528 | 264.389136 | 264.3825264 | 264.1354192 | 261.1268824 |
| 264.399232 | 264.3948688 | 264.3540528 | 264.386136 | 264.3825264 | 264.1354192 | 261.1248824 |
| 264.400232 | 264.3938688 | 264.3570528 | 264.390136 | 264.3825264 | 264.1354192 | 261.1278824 |
| 264.398232 | 264.3958688 | 264.3570528 | 264.389136 | 264.3835264 | 264.1344192 | 261.1278824 |
| 264.402232 | 264.3938688 | 264.3550528 | 264.387136 | 264.3845264 | 264.1364192 | 261.1288824 |
| 264.401232 | 264.3968688 | 264.3580528 | 264.388136 | 264.3855264 | 264.1374192 | 261.1308824 |
| 264.401232 | 264.3948688 | 264.3560528 | 264.388136 | 264.3845264 | 264.1354192 | 261.1308824 |
| 264.399232 | 264.3938688 | 264.3550528 | 264.385136 | 264.3825264 | 264.1334192 | 261.1288824 |
| 264.398232 | 264.3948688 | 264.3560528 | 264.386136 | 264.3855264 | 264.1364192 | 261.1338824 |
| 264.397232 | 264.3938688 | 264.3540528 | 264.385136 | 264.3825264 | 264.1334192 | 261.1338824 |
| 264.396232 | 264.3918688 | 264.3530528 | 264.383136 | 264.3805264 | 264.1324192 | 261.1328824 |
| 264.394232 | 264.3918688 | 264.3520528 | 264.381136 | 264.3805264 | 264.1294192 | 261.1348824 |
| 264.394232 | 264.3888688 | 264.3510528 | 264.381136 | 264.3805264 | 264.1304192 | 261.1368824 |
| 264.392232 | 264.3908688 | 264.3510528 | 264.379136 | 264.3795264 | 264.1304192 | 261.1358824 |
| 264.392232 | 264.3878688 | 264.3510528 | 264.381136 | 264.3775264 | 264.1294192 | 261.1408824 |
| 264.391232 | 264.3878688 | 264.3500528 | 264.380136 | 264.3775264 | 264.1294192 | 261.1408824 |
| 264.391232 | 264.3858688 | 264.3480528 | 264.380136 | 264.3775264 | 264.1274192 | 261.1418824 |
| 264.388232 | 264.3848688 | 264.3460528 | 264.375136 | 264.3755264 | 264.1244192 | 261.1428824 |
| 264.388232 | 264.3838688 | 264.3470528 | 264.378136 | 264.3745264 | 264.1254192 | 261.1428824 |
| 264.389232 | 264.3848688 | 264.3480528 | 264.376136 | 264.3755264 | 264.1264192 | 261.1438824 |
| 264.385232 | 264.3808688 | 264.3450528 | 264.373136 | 264.3705264 | 264.1234192 | 261.1428824 |
| 264.386232 | 264.3848688 | 264.3460528 | 264.375136 | 264.3735264 | 264.1244192 | 261.1438824 |
| 264.383232 | 264.3818688 | 264.3440528 | 264.371136 | 264.3695264 | 264.1224192 | 261.1438824 |
| 264.385232 | 264.3828688 | 264.3440528 | 264.373136 | 264.3735264 | 264.1214192 | 261.1458824 |
| 264.384232 | 264.3808688 | 264.3450528 | 264.376136 | 264.3715264 | 264.1224192 | 261.1468824 |
| 264.384232 | 264.3828688 | 264.3440528 | 264.373136 | 264.3715264 | 264.1224192 | 261.1468824 |
| 264.382232 | 264.3788688 | 264.3420528 | 264.372136 | 264.3695264 | 264.1214192 | 261.1458824 |
| 264.382232 | 264.3788688 | 264.3400528 | 264.371136 | 264.3675264 | 264.1184192 | 261.1438824 |
| 264.382232 | 264.3788688 | 264.3430528 | 264.371136 | 264.3675264 | 264.1194192 | 261.1448824 |



|            |             |             |            |             |             |             |
|------------|-------------|-------------|------------|-------------|-------------|-------------|
| 264.381232 | 264.3788688 | 264.3430528 | 264.370136 | 264.3675264 | 264.1194192 | 261.1448824 |
| 264.382232 | 264.3798688 | 264.3440528 | 264.370136 | 264.3685264 | 264.1204192 | 261.1458824 |
| 264.381232 | 264.3768688 | 264.3420528 | 264.367136 | 264.3665264 | 264.1174192 | 261.1428824 |
| 264.381232 | 264.3798688 | 264.3430528 | 264.371136 | 264.3675264 | 264.1194192 | 261.1478824 |
| 264.379232 | 264.3768688 | 264.3410528 | 264.366136 | 264.3665264 | 264.1194192 | 261.1438824 |
| 264.378232 | 264.3738688 | 264.3390528 | 264.366136 | 264.3645264 | 264.1154192 | 261.1408824 |
| 264.380232 | 264.3758688 | 264.3400528 | 264.369136 | 264.3655264 | 264.1164192 | 261.1438824 |
| 264.379232 | 264.3758688 | 264.3390528 | 264.367136 | 264.3635264 | 264.1154192 | 261.1418824 |
| 264.380232 | 264.3758688 | 264.3420528 | 264.369136 | 264.3635264 | 264.1164192 | 261.1448824 |
| 264.380232 | 264.3758688 | 264.3420528 | 264.369136 | 264.3665264 | 264.1174192 | 261.1428824 |
| 264.378232 | 264.3748688 | 264.3400528 | 264.367136 | 264.3635264 | 264.1174192 | 261.1428824 |
| 264.379232 | 264.3758688 | 264.3390528 | 264.365136 | 264.3625264 | 264.1134192 | 261.1448824 |
| 264.381232 | 264.3758688 | 264.3410528 | 264.368136 | 264.3655264 | 264.1174192 | 261.1448824 |
| 264.377232 | 264.3738688 | 264.3410528 | 264.368136 | 264.3645264 | 264.1174192 | 261.1448824 |
| 264.377232 | 264.3738688 | 264.3410528 | 264.365136 | 264.3645264 | 264.1184192 | 261.1448824 |
| 264.379232 | 264.3738688 | 264.3370528 | 264.365136 | 264.3625264 | 264.1174192 | 261.1448824 |
| 264.377232 | 264.3738688 | 264.3390528 | 264.367136 | 264.3645264 | 264.1134192 | 261.1408824 |
| 264.377232 | 264.3758688 | 264.3390528 | 264.368136 | 264.3635264 | 264.1164192 | 261.1438824 |
| 264.378232 | 264.3768688 | 264.3400528 | 264.368136 | 264.3635264 | 264.1164192 | 261.1438824 |
| 264.375232 | 264.3758688 | 264.3390528 | 264.367136 | 264.3625264 | 264.1174192 | 261.1408824 |
| 264.378232 | 264.3768688 | 264.3400528 | 264.368136 | 264.3635264 | 264.1184192 | 261.1428824 |
| 264.377232 | 264.3758688 | 264.3400528 | 264.366136 | 264.3625264 | 264.1164192 | 261.1428824 |
| 264.382232 | 264.3768688 | 264.3400528 | 264.370136 | 264.3635264 | 264.1164192 | 261.1438824 |
| 264.383232 | 264.3798688 | 264.3420528 | 264.371136 | 264.3665264 | 264.1194192 | 261.1458824 |
| 264.380232 | 264.3788688 | 264.3400528 | 264.370136 | 264.3635264 | 264.1164192 | 261.1428824 |
| 264.382232 | 264.3768688 | 264.3400528 | 264.371136 | 264.3675264 | 264.1184192 | 261.1428824 |
| 264.380232 | 264.3798688 | 264.3400528 | 264.370136 | 264.3675264 | 264.1184192 | 261.1428824 |
| 264.382232 | 264.3788688 | 264.3420528 | 264.371136 | 264.3695264 | 264.1184192 | 261.1428824 |
| 264.383232 | 264.3818688 | 264.3440528 | 264.371136 | 264.3705264 | 264.1194192 | 261.1438824 |
| 264.387232 | 264.3848688 | 264.3450528 | 264.376136 | 264.3725264 | 264.1194192 | 261.1458824 |
| 264.389232 | 264.3848688 | 264.3450528 | 264.376136 | 264.3735264 | 264.1254192 | 261.1458824 |
| 264.389232 | 264.3848688 | 264.3460528 | 264.378136 | 264.3725264 | 264.1234192 | 261.1428824 |
| 264.391232 | 264.3868688 | 264.3480528 | 264.379136 | 264.3745264 | 264.1254192 | 261.1438824 |
| 264.391232 | 264.3868688 | 264.3460528 | 264.379136 | 264.3745264 | 264.1254192 | 261.1458824 |
| 264.390232 | 264.3868688 | 264.3460528 | 264.378136 | 264.3745264 | 264.1244192 | 261.1428824 |
| 264.393232 | 264.3878688 | 264.3480528 | 264.381136 | 264.3775264 | 264.1274192 | 261.1458824 |
| 264.395232 | 264.3908688 | 264.3490528 | 264.384136 | 264.3775264 | 264.1294192 | 261.1458824 |
| 264.394232 | 264.3898688 | 264.3460528 | 264.383136 | 264.3785264 | 264.1264192 | 261.1418824 |
| 264.395232 | 264.3908688 | 264.3480528 | 264.383136 | 264.3795264 | 264.1304192 | 261.1448824 |
| 264.393232 | 264.3928688 | 264.3500528 | 264.383136 | 264.3795264 | 264.1314192 | 261.1458824 |
| 264.397232 | 264.3928688 | 264.3500528 | 264.386136 | 264.3805264 | 264.1314192 | 261.1458824 |
| 264.395232 | 264.3928688 | 264.3520528 | 264.385136 | 264.3815264 | 264.1314192 | 261.1458824 |
| 264.397232 | 264.3948688 | 264.3500528 | 264.386136 | 264.3835264 | 264.1334192 | 261.1458824 |
| 264.399232 | 264.3958688 | 264.3530528 | 264.388136 | 264.3845264 | 264.1354192 | 261.1458824 |
| 264.399232 | 264.3958688 | 264.3510528 | 264.389136 | 264.3845264 | 264.1334192 | 261.1478824 |
| 264.400232 | 264.3988688 | 264.3510528 | 264.391136 | 264.3865264 | 264.1354192 | 261.1498824 |
| 264.401232 | 264.3988688 | 264.3550528 | 264.389136 | 264.3865264 | 264.1354192 | 261.1508824 |

|            |             |             |            |             |             |             |
|------------|-------------|-------------|------------|-------------|-------------|-------------|
| 264.401232 | 264.3998688 | 264.3540528 | 264.390136 | 264.3855264 | 264.1354192 | 261.1478824 |
| 264.403232 | 264.3998688 | 264.3540528 | 264.391136 | 264.3865264 | 264.1344192 | 261.1518824 |
| 264.403232 | 264.4008688 | 264.3550528 | 264.391136 | 264.3875264 | 264.1354192 | 261.1508824 |
| 264.404232 | 264.4008688 | 264.3570528 | 264.391136 | 264.3875264 | 264.1364192 | 261.1528824 |
| 264.403232 | 264.4008688 | 264.3540528 | 264.390136 | 264.3865264 | 264.1334192 | 261.1518824 |
| 264.402232 | 264.3988688 | 264.3570528 | 264.391136 | 264.3865264 | 264.1374192 | 261.1508824 |
| 264.401232 | 264.3988688 | 264.3570528 | 264.389136 | 264.3845264 | 264.1354192 | 261.1528824 |
| 264.402232 | 264.4008688 | 264.3580528 | 264.389136 | 264.3875264 | 264.1364192 | 261.1578824 |
| 264.402232 | 264.4008688 | 264.3600528 | 264.389136 | 264.3855264 | 264.1364192 | 261.1558824 |
| 264.400232 | 264.3988688 | 264.3580528 | 264.386136 | 264.3845264 | 264.1324192 | 261.1538824 |
| 264.399232 | 264.3998688 | 264.3590528 | 264.387136 | 264.3835264 | 264.1314192 | 261.1568824 |
| 264.398232 | 264.3968688 | 264.3590528 | 264.385136 | 264.3815264 | 264.1324192 | 261.1548824 |
| 264.396232 | 264.3968688 | 264.3590528 | 264.382136 | 264.3805264 | 264.1324192 | 261.1548824 |
| 264.394232 | 264.3958688 | 264.3590528 | 264.381136 | 264.3805264 | 264.1284192 | 261.1548824 |
| 264.394232 | 264.3958688 | 264.3580528 | 264.384136 | 264.3805264 | 264.1264192 | 261.1548824 |
| 264.395232 | 264.3958688 | 264.3610528 | 264.384136 | 264.3795264 | 264.1284192 | 261.1578824 |
| 264.394232 | 264.3958688 | 264.3610528 | 264.381136 | 264.3785264 | 264.1254192 | 261.1568824 |
| 264.394232 | 264.3938688 | 264.3610528 | 264.379136 | 264.3785264 | 264.1254192 | 261.1588824 |
| 264.390232 | 264.3928688 | 264.3610528 | 264.379136 | 264.3765264 | 264.1254192 | 261.1568824 |
| 264.390232 | 264.3928688 | 264.3610528 | 264.377136 | 264.3735264 | 264.1214192 | 261.1588824 |
| 264.390232 | 264.3928688 | 264.3620528 | 264.377136 | 264.3735264 | 264.1244192 | 261.1578824 |
| 264.389232 | 264.3898688 | 264.3590528 | 264.376136 | 264.3735264 | 264.1214192 | 261.1568824 |
| 264.388232 | 264.3908688 | 264.3620528 | 264.375136 | 264.3725264 | 264.1224192 | 261.1598824 |
| 264.388232 | 264.3878688 | 264.3620528 | 264.374136 | 264.3695264 | 264.1214192 | 261.1598824 |
| 264.387232 | 264.3908688 | 264.3630528 | 264.373136 | 264.3685264 | 264.1224192 | 261.1608824 |
| 264.386232 | 264.3858688 | 264.3630528 | 264.372136 | 264.3675264 | 264.1164192 | 261.1578824 |
| 264.383232 | 264.3838688 | 264.3610528 | 264.370136 | 264.3665264 | 264.1164192 | 261.1578824 |
| 264.383232 | 264.3848688 | 264.3610528 | 264.370136 | 264.3645264 | 264.1154192 | 261.1568824 |
| 264.383232 | 264.3838688 | 264.3620528 | 264.366136 | 264.3625264 | 264.1114192 | 261.1568824 |
| 264.379232 | 264.3818688 | 264.3590528 | 264.368136 | 264.3615264 | 264.1104192 | 261.1558824 |
| 264.379232 | 264.3818688 | 264.3590528 | 264.368136 | 264.3635264 | 264.1074192 | 261.1578824 |
| 264.378232 | 264.3808688 | 264.3580528 | 264.365136 | 264.3615264 | 264.1084192 | 261.1578824 |
| 264.378232 | 264.3788688 | 264.3590528 | 264.363136 | 264.3595264 | 264.1054192 | 261.1578824 |
| 264.378232 | 264.3788688 | 264.3590528 | 264.363136 | 264.3595264 | 264.1074192 | 261.1538824 |
| 264.375232 | 264.3788688 | 264.3570528 | 264.361136 | 264.3575264 | 264.1044192 | 261.1538824 |
| 264.376232 | 264.3788688 | 264.3600528 | 264.363136 | 264.3585264 | 264.1054192 | 261.1548824 |
| 264.375232 | 264.3768688 | 264.3580528 | 264.361136 | 264.3555264 | 264.1034192 | 261.1538824 |
| 264.375232 | 264.3758688 | 264.3580528 | 264.360136 | 264.3555264 | 264.1004192 | 261.1518824 |
| 264.372232 | 264.3768688 | 264.3610528 | 264.361136 | 264.3565264 | 264.1034192 | 261.1548824 |
| 264.373232 | 264.3748688 | 264.3590528 | 264.360136 | 264.3545264 | 264.1024192 | 261.1508824 |
| 264.372232 | 264.3748688 | 264.3570528 | 264.357136 | 264.3515264 | 264.1014192 | 261.1528824 |
| 264.371232 | 264.3718688 | 264.3540528 | 264.356136 | 264.3515264 | 264.0984192 | 261.1518824 |
| 264.369232 | 264.3738688 | 264.3540528 | 264.358136 | 264.3515264 | 264.0984192 | 261.1498824 |
| 264.372232 | 264.3738688 | 264.3560528 | 264.359136 | 264.3535264 | 264.1014192 | 261.1518824 |
| 264.372232 | 264.3738688 | 264.3560528 | 264.357136 | 264.3515264 | 264.0974192 | 261.1478824 |
| 264.372232 | 264.3718688 | 264.3560528 | 264.354136 | 264.3505264 | 264.0984192 | 261.1468824 |
| 264.373232 | 264.3758688 | 264.3580528 | 264.360136 | 264.3525264 | 264.1004192 | 261.1498824 |

|            |             |             |            |             |             |             |
|------------|-------------|-------------|------------|-------------|-------------|-------------|
| 264.372232 | 264.3718688 | 264.3540528 | 264.357136 | 264.3495264 | 264.0954192 | 261.1468824 |
| 264.372232 | 264.3718688 | 264.3540528 | 264.356136 | 264.3495264 | 264.0964192 | 261.1448824 |
| 264.371232 | 264.3718688 | 264.3550528 | 264.360136 | 264.3525264 | 264.0984192 | 261.1438824 |
| 264.374232 | 264.3748688 | 264.3560528 | 264.361136 | 264.3555264 | 264.0994192 | 261.1418824 |
| 264.376232 | 264.3748688 | 264.3540528 | 264.362136 | 264.3545264 | 264.1014192 | 261.1438824 |
| 264.376232 | 264.3768688 | 264.3520528 | 264.361136 | 264.3545264 | 264.1044192 | 261.1418824 |
| 264.382232 | 264.3808688 | 264.3560528 | 264.365136 | 264.3595264 | 264.1094192 | 261.1448824 |
| 264.379232 | 264.3808688 | 264.3550528 | 264.368136 | 264.3615264 | 264.1114192 | 261.1448824 |
| 264.386232 | 264.3828688 | 264.3570528 | 264.370136 | 264.3645264 | 264.1164192 | 261.1428824 |
| 264.384232 | 264.3828688 | 264.3550528 | 264.372136 | 264.3645264 | 264.1174192 | 261.1418824 |
| 264.388232 | 264.3878688 | 264.3570528 | 264.375136 | 264.3685264 | 264.1184192 | 261.1418824 |
| 264.391232 | 264.3898688 | 264.3560528 | 264.379136 | 264.3695264 | 264.1234192 | 261.1408824 |
| 264.396232 | 264.3918688 | 264.3580528 | 264.384136 | 264.3775264 | 264.1254192 | 261.1408824 |
| 264.407232 | 264.4008688 | 264.3580528 | 264.401136 | 264.3955264 | 264.1314192 | 261.1378824 |
| 264.430232 | 264.4148688 | 264.3610528 | 264.420136 | 264.4115264 | 264.1504192 | 261.1408824 |
| 264.439232 | 264.4218688 | 264.3610528 | 264.425136 | 264.4145264 | 264.1734192 | 261.1368824 |
| 264.443232 | 264.4278688 | 264.3620528 | 264.431136 | 264.4205264 | 264.1884192 | 261.1378824 |
| 264.445232 | 264.4288688 | 264.3650528 | 264.431136 | 264.4205264 | 264.1934192 | 261.1358824 |
| 264.449232 | 264.4328688 | 264.3680528 | 264.433136 | 264.4245264 | 264.2004192 | 261.1388824 |
| 264.445232 | 264.4338688 | 264.3670528 | 264.431136 | 264.4205264 | 264.1974192 | 261.1358824 |
| 264.443232 | 264.4328688 | 264.3700528 | 264.430136 | 264.4215264 | 264.1934192 | 261.1368824 |
| 264.444232 | 264.4328688 | 264.3710528 | 264.430136 | 264.4215264 | 264.1924192 | 261.1388824 |
| 264.438232 | 264.4318688 | 264.3700528 | 264.424136 | 264.4185264 | 264.1884192 | 261.1358824 |
| 264.439232 | 264.4318688 | 264.3740528 | 264.428136 | 264.4185264 | 264.1864192 | 261.1388824 |
| 264.438232 | 264.4318688 | 264.3740528 | 264.426136 | 264.4205264 | 264.1794192 | 261.1428824 |
| 264.438232 | 264.4318688 | 264.3760528 | 264.426136 | 264.4205264 | 264.1764192 | 261.1488824 |
| 264.438232 | 264.4318688 | 264.3780528 | 264.424136 | 264.4205264 | 264.1744192 | 261.1538824 |
| 264.436232 | 264.4328688 | 264.3780528 | 264.424136 | 264.4195264 | 264.1714192 | 261.1628824 |
| 264.435232 | 264.4318688 | 264.3760528 | 264.424136 | 264.4175264 | 264.1694192 | 261.1638824 |
| 264.432232 | 264.4298688 | 264.3780528 | 264.422136 | 264.4175264 | 264.1654192 | 261.1708824 |
| 264.432232 | 264.4298688 | 264.3780528 | 264.422136 | 264.4155264 | 264.1634192 | 261.1708824 |
| 264.432232 | 264.4278688 | 264.3790528 | 264.420136 | 264.4175264 | 264.1644192 | 261.1718824 |
| 264.430232 | 264.4258688 | 264.3770528 | 264.417136 | 264.4135264 | 264.1594192 | 261.1718824 |
| 264.427232 | 264.4258688 | 264.3780528 | 264.418136 | 264.4125264 | 264.1584192 | 261.1758824 |
| 264.425232 | 264.4238688 | 264.3780528 | 264.414136 | 264.4105264 | 264.1544192 | 261.1738824 |
| 264.423232 | 264.4238688 | 264.3780528 | 264.414136 | 264.4105264 | 264.1544192 | 261.1758824 |
| 264.423232 | 264.4228688 | 264.3800528 | 264.413136 | 264.4095264 | 264.1504192 | 261.1758824 |
| 264.421232 | 264.4208688 | 264.3770528 | 264.411136 | 264.4055264 | 264.1504192 | 261.1768824 |
| 264.418232 | 264.4178688 | 264.3760528 | 264.408136 | 264.4045264 | 264.1454192 | 261.1738824 |
| 264.419232 | 264.4188688 | 264.3770528 | 264.410136 | 264.4065264 | 264.1464192 | 261.1768824 |
| 264.417232 | 264.4178688 | 264.3770528 | 264.407136 | 264.4035264 | 264.1464192 | 261.1738824 |
| 264.417232 | 264.4158688 | 264.3750528 | 264.406136 | 264.4035264 | 264.1464192 | 261.1758824 |
| 264.418232 | 264.4168688 | 264.3760528 | 264.408136 | 264.4075264 | 264.1434192 | 261.1768824 |
| 264.415232 | 264.4138688 | 264.3730528 | 264.406136 | 264.4035264 | 264.1404192 | 261.1738824 |
| 264.413232 | 264.4138688 | 264.3730528 | 264.404136 | 264.4035264 | 264.1404192 | 261.1718824 |
| 264.418232 | 264.4158688 | 264.3730528 | 264.407136 | 264.4045264 | 264.1414192 | 261.1718824 |
| 264.418232 | 264.4148688 | 264.3740528 | 264.408136 | 264.4045264 | 264.1414192 | 261.1748824 |

|            |             |             |            |             |             |             |
|------------|-------------|-------------|------------|-------------|-------------|-------------|
| 264.416232 | 264.4138688 | 264.3710528 | 264.408136 | 264.4045264 | 264.1414192 | 261.1718824 |
| 264.416232 | 264.4138688 | 264.3690528 | 264.405136 | 264.4005264 | 264.1404192 | 261.1718824 |
| 264.417232 | 264.4148688 | 264.3740528 | 264.406136 | 264.4035264 | 264.1444192 | 261.1708824 |
| 264.419232 | 264.4148688 | 264.3720528 | 264.408136 | 264.4055264 | 264.1444192 | 261.1708824 |
| 264.418232 | 264.4138688 | 264.3730528 | 264.407136 | 264.4005264 | 264.1454192 | 261.1718824 |
| 264.415232 | 264.4128688 | 264.3700528 | 264.405136 | 264.4015264 | 264.1444192 | 261.1688824 |
| 264.413232 | 264.4098688 | 264.3680528 | 264.405136 | 264.4015264 | 264.1424192 | 261.1668824 |
| 264.413232 | 264.4098688 | 264.3680528 | 264.404136 | 264.3995264 | 264.1404192 | 261.1668824 |
| 264.410232 | 264.4098688 | 264.3680528 | 264.404136 | 264.3985264 | 264.1424192 | 261.1668824 |
| 264.412232 | 264.4098688 | 264.3690528 | 264.401136 | 264.3985264 | 264.1414192 | 261.1678824 |
| 264.412232 | 264.4098688 | 264.3700528 | 264.403136 | 264.3985264 | 264.1394192 | 261.1658824 |
| 264.412232 | 264.4098688 | 264.3690528 | 264.401136 | 264.3965264 | 264.1394192 | 261.1658824 |
| 264.409232 | 264.4088688 | 264.3650528 | 264.400136 | 264.3955264 | 264.1394192 | 261.1658824 |
| 264.412232 | 264.4098688 | 264.3680528 | 264.401136 | 264.3985264 | 264.1414192 | 261.1678824 |
| 264.409232 | 264.4108688 | 264.3660528 | 264.401136 | 264.3965264 | 264.1424192 | 261.1688824 |
| 264.406232 | 264.4078688 | 264.3660528 | 264.397136 | 264.3945264 | 264.1394192 | 261.1668824 |
| 264.407232 | 264.4068688 | 264.3670528 | 264.398136 | 264.3935264 | 264.1354192 | 261.1658824 |
| 264.410232 | 264.4078688 | 264.3680528 | 264.399136 | 264.3935264 | 264.1394192 | 261.1678824 |
| 264.409232 | 264.4068688 | 264.3690528 | 264.398136 | 264.3915264 | 264.1374192 | 261.1678824 |
| 264.408232 | 264.4078688 | 264.3680528 | 264.398136 | 264.3935264 | 264.1374192 | 261.1678824 |
| 264.409232 | 264.4068688 | 264.3670528 | 264.398136 | 264.3935264 | 264.1374192 | 261.1658824 |
| 264.408232 | 264.4068688 | 264.3670528 | 264.399136 | 264.3935264 | 264.1374192 | 261.1678824 |
| 264.405232 | 264.4088688 | 264.3670528 | 264.396136 | 264.3915264 | 264.1364192 | 261.1658824 |
| 264.411232 | 264.4098688 | 264.3680528 | 264.397136 | 264.3945264 | 264.1374192 | 261.1688824 |
| 264.405232 | 264.4038688 | 264.3640528 | 264.395136 | 264.3905264 | 264.1324192 | 261.1648824 |
| 264.410232 | 264.4078688 | 264.3700528 | 264.398136 | 264.3935264 | 264.1374192 | 261.1658824 |
| 264.410232 | 264.4098688 | 264.3710528 | 264.400136 | 264.3935264 | 264.1374192 | 261.1678824 |
| 264.408232 | 264.4098688 | 264.3700528 | 264.399136 | 264.3955264 | 264.1354192 | 261.1678824 |
| 264.407232 | 264.4088688 | 264.3690528 | 264.400136 | 264.3935264 | 264.1364192 | 261.1658824 |
| 264.410232 | 264.4098688 | 264.3690528 | 264.400136 | 264.3955264 | 264.1364192 | 261.1658824 |
| 264.408232 | 264.4068688 | 264.3690528 | 264.398136 | 264.3945264 | 264.1354192 | 261.1648824 |
| 264.408232 | 264.4088688 | 264.3680528 | 264.399136 | 264.3925264 | 264.1334192 | 261.1638824 |
| 264.409232 | 264.4078688 | 264.3680528 | 264.399136 | 264.3925264 | 264.1354192 | 261.1648824 |
| 264.408232 | 264.4088688 | 264.3700528 | 264.397136 | 264.3945264 | 264.1354192 | 261.1638824 |
| 264.409232 | 264.4088688 | 264.3720528 | 264.399136 | 264.3945264 | 264.1354192 | 261.1638824 |
| 264.411232 | 264.4118688 | 264.3730528 | 264.402136 | 264.3955264 | 264.1384192 | 261.1668824 |
| 264.409232 | 264.4118688 | 264.3730528 | 264.402136 | 264.3965264 | 264.1374192 | 261.1648824 |
| 264.412232 | 264.4118688 | 264.3740528 | 264.400136 | 264.3985264 | 264.1394192 | 261.1648824 |
| 264.410232 | 264.4128688 | 264.3740528 | 264.401136 | 264.3965264 | 264.1384192 | 261.1638824 |
| 264.411232 | 264.4108688 | 264.3730528 | 264.401136 | 264.3975264 | 264.1354192 | 261.1648824 |
| 264.413232 | 264.4128688 | 264.3730528 | 264.404136 | 264.3975264 | 264.1374192 | 261.1648824 |
| 264.415232 | 264.4148688 | 264.3730528 | 264.404136 | 264.3995264 | 264.1384192 | 261.1628824 |
| 264.414232 | 264.4158688 | 264.3730528 | 264.406136 | 264.4025264 | 264.1424192 | 261.1638824 |
| 264.415232 | 264.4148688 | 264.3730528 | 264.406136 | 264.3995264 | 264.1384192 | 261.1628824 |
| 264.418232 | 264.4178688 | 264.3760528 | 264.409136 | 264.4025264 | 264.1424192 | 261.1638824 |
| 264.420232 | 264.4178688 | 264.3760528 | 264.409136 | 264.4045264 | 264.1424192 | 261.1638824 |
| 264.418232 | 264.4178688 | 264.3750528 | 264.409136 | 264.4005264 | 264.1444192 | 261.1628824 |

|            |             |             |            |             |             |             |
|------------|-------------|-------------|------------|-------------|-------------|-------------|
| 264.417232 | 264.4158688 | 264.3750528 | 264.408136 | 264.4025264 | 264.1464192 | 261.1628824 |
| 264.418232 | 264.4178688 | 264.3780528 | 264.408136 | 264.4035264 | 264.1434192 | 261.1638824 |
| 264.419232 | 264.4188688 | 264.3790528 | 264.409136 | 264.4045264 | 264.1444192 | 261.1648824 |
| 264.422232 | 264.4238688 | 264.3820528 | 264.414136 | 264.4055264 | 264.1454192 | 261.1688824 |
| 264.420232 | 264.4218688 | 264.3800528 | 264.412136 | 264.4045264 | 264.1434192 | 261.1658824 |
| 264.420232 | 264.4188688 | 264.3770528 | 264.409136 | 264.4015264 | 264.1444192 | 261.1648824 |
| 264.420232 | 264.4218688 | 264.3800528 | 264.411136 | 264.4045264 | 264.1444192 | 261.1648824 |
| 264.420232 | 264.4208688 | 264.3820528 | 264.409136 | 264.4025264 | 264.1454192 | 261.1658824 |
| 264.420232 | 264.4218688 | 264.3800528 | 264.410136 | 264.4045264 | 264.1444192 | 261.1668824 |
| 264.417232 | 264.4198688 | 264.3830528 | 264.410136 | 264.4035264 | 264.1444192 | 261.1648824 |
| 264.420232 | 264.4208688 | 264.3840528 | 264.411136 | 264.4045264 | 264.1454192 | 261.1698824 |
| 264.419232 | 264.4198688 | 264.3830528 | 264.407136 | 264.4015264 | 264.1464192 | 261.1718824 |
| 264.417232 | 264.4198688 | 264.3830528 | 264.407136 | 264.4015264 | 264.1434192 | 261.1688824 |
| 264.419232 | 264.4198688 | 264.3830528 | 264.409136 | 264.4035264 | 264.1444192 | 261.1718824 |
| 264.419232 | 264.4188688 | 264.3810528 | 264.407136 | 264.4035264 | 264.1434192 | 261.1738824 |
| 264.415232 | 264.4188688 | 264.3830528 | 264.407136 | 264.4015264 | 264.1434192 | 261.1738824 |
| 264.414232 | 264.4178688 | 264.3830528 | 264.406136 | 264.4025264 | 264.1434192 | 261.1718824 |
| 264.414232 | 264.4178688 | 264.3840528 | 264.406136 | 264.4025264 | 264.1444192 | 261.1778824 |
| 264.414232 | 264.4168688 | 264.3840528 | 264.403136 | 264.3995264 | 264.1444192 | 261.1758824 |
| 264.413232 | 264.4158688 | 264.3840528 | 264.402136 | 264.3985264 | 264.1394192 | 261.1748824 |
| 264.412232 | 264.4158688 | 264.3850528 | 264.402136 | 264.3985264 | 264.1394192 | 261.1738824 |
| 264.411232 | 264.4138688 | 264.3860528 | 264.400136 | 264.3945264 | 264.1394192 | 261.1768824 |
| 264.408232 | 264.4128688 | 264.3820528 | 264.400136 | 264.3945264 | 264.1354192 | 261.1728824 |
| 264.419232 | 264.4188688 | 264.3860528 | 264.412136 | 264.4065264 | 264.1354192 | 261.1768824 |
| 264.426232 | 264.4238688 | 264.3850528 | 264.419136 | 264.4145264 | 264.1384192 | 261.1758824 |
| 264.433232 | 264.4298688 | 264.3860528 | 264.425136 | 264.4205264 | 264.1554192 | 261.1718824 |
| 264.440232 | 264.4328688 | 264.3860528 | 264.429136 | 264.4215264 | 264.1674192 | 261.1728824 |
| 264.439232 | 264.4328688 | 264.3860528 | 264.424136 | 264.4205264 | 264.1734192 | 261.1628824 |
| 264.443232 | 264.4388688 | 264.3880528 | 264.433136 | 264.4285264 | 264.1814192 | 261.1738824 |
| 264.446232 | 264.4398688 | 264.3870528 | 264.434136 | 264.4275264 | 264.1844192 | 261.1748824 |
| 264.447232 | 264.4418688 | 264.3910528 | 264.435136 | 264.4285264 | 264.1854192 | 261.1788824 |
| 264.449232 | 264.4438688 | 264.3910528 | 264.441136 | 264.4365264 | 264.1854192 | 261.1798824 |
| 264.474232 | 264.4568688 | 264.3940528 | 264.469136 | 264.4665264 | 264.2114192 | 261.1798824 |
| 264.516232 | 264.4808688 | 264.3940528 | 264.512136 | 264.5045264 | 264.2914192 | 261.1868824 |
| 264.552232 | 264.5038688 | 264.3960528 | 264.546136 | 264.5335264 | 264.3674192 | 261.1898824 |
| 264.578232 | 264.5238688 | 264.4000528 | 264.569136 | 264.5565264 | 264.4254192 | 261.1968824 |
| 264.592232 | 264.5358688 | 264.4030528 | 264.580136 | 264.5645264 | 264.4504192 | 261.1998824 |
| 264.599232 | 264.5458688 | 264.4080528 | 264.590136 | 264.5765264 | 264.4644192 | 261.2038824 |
| 264.605232 | 264.5538688 | 264.4090528 | 264.597136 | 264.5855264 | 264.4704192 | 261.2078824 |
| 264.619232 | 264.5668688 | 264.4150528 | 264.613136 | 264.6015264 | 264.4814192 | 261.2198824 |
| 264.637232 | 264.5788688 | 264.4140528 | 264.634136 | 264.6195264 | 264.5024192 | 261.2268824 |
| 264.657232 | 264.5958688 | 264.4200528 | 264.656136 | 264.6415264 | 264.5354192 | 261.2408824 |
| 264.675232 | 264.6108688 | 264.4230528 | 264.672136 | 264.6595264 | 264.5634192 | 261.2518824 |
| 264.689232 | 264.6228688 | 264.4240528 | 264.682136 | 264.6675264 | 264.5834192 | 261.2628824 |
| 264.698232 | 264.6348688 | 264.4320528 | 264.691136 | 264.6805264 | 264.5984192 | 261.2718824 |
| 264.705232 | 264.6438688 | 264.4340528 | 264.696136 | 264.6845264 | 264.6034192 | 261.2798824 |
| 264.705232 | 264.6478688 | 264.4360528 | 264.698136 | 264.6875264 | 264.6004192 | 261.2888824 |

|            |             |             |            |             |             |             |
|------------|-------------|-------------|------------|-------------|-------------|-------------|
| 264.707232 | 264.6528688 | 264.4400528 | 264.699136 | 264.6895264 | 264.6004192 | 261.2968824 |
| 264.707232 | 264.6548688 | 264.4440528 | 264.698136 | 264.6875264 | 264.5914192 | 261.3068824 |
| 264.699232 | 264.6528688 | 264.4450528 | 264.690136 | 264.6815264 | 264.5754192 | 261.3128824 |
| 264.698232 | 264.6528688 | 264.4490528 | 264.687136 | 264.6805264 | 264.5614192 | 261.3188824 |
| 264.693232 | 264.6518688 | 264.4530528 | 264.683136 | 264.6775264 | 264.5424192 | 261.3248824 |
| 264.693232 | 264.6548688 | 264.4540528 | 264.687136 | 264.6805264 | 264.5334192 | 261.3368824 |
| 264.693232 | 264.6568688 | 264.4590528 | 264.685136 | 264.6805264 | 264.5264192 | 261.3378824 |
| 264.691232 | 264.6548688 | 264.4600528 | 264.683136 | 264.6795264 | 264.5114192 | 261.3408824 |
| 264.691232 | 264.6558688 | 264.4630528 | 264.683136 | 264.6825264 | 264.5044192 | 261.3438824 |
| 264.703232 | 264.6678688 | 264.4690528 | 264.698136 | 264.6965264 | 264.5064192 | 261.3488824 |
| 264.715232 | 264.6728688 | 264.4690528 | 264.714136 | 264.7115264 | 264.5444192 | 261.3458824 |
| 264.733232 | 264.6878688 | 264.4710528 | 264.731136 | 264.7275264 | 264.5914192 | 261.3528824 |
| 264.746232 | 264.6988688 | 264.4750528 | 264.742136 | 264.7395264 | 264.6184192 | 261.3518824 |
| 264.751232 | 264.7038688 | 264.4780528 | 264.749136 | 264.7445264 | 264.6274192 | 261.3528824 |
| 264.758232 | 264.7118688 | 264.4810528 | 264.753136 | 264.7495264 | 264.6304192 | 261.3628824 |
| 264.761232 | 264.7148688 | 264.4840528 | 264.756136 | 264.7565264 | 264.6374192 | 261.3678824 |
| 264.773232 | 264.7248688 | 264.4870528 | 264.772136 | 264.7675264 | 264.6614192 | 261.3778824 |
| 264.784232 | 264.7338688 | 264.4890528 | 264.784136 | 264.7805264 | 264.6794192 | 261.3828824 |
| 264.798232 | 264.7438688 | 264.4950528 | 264.798136 | 264.7935264 | 264.6964192 | 261.3908824 |
| 264.812232 | 264.7588688 | 264.4970528 | 264.811136 | 264.8055264 | 264.7124192 | 261.3928824 |
| 264.815232 | 264.7628688 | 264.5010528 | 264.816136 | 264.8115264 | 264.7194192 | 261.4018824 |
| 264.825232 | 264.7688688 | 264.5040528 | 264.823136 | 264.8185264 | 264.7264192 | 261.4078824 |
| 264.832232 | 264.7758688 | 264.5080528 | 264.828136 | 264.8245264 | 264.7294192 | 261.4138824 |
| 264.837232 | 264.7828688 | 264.5120528 | 264.837136 | 264.8345264 | 264.7344192 | 261.4198824 |
| 264.844232 | 264.7888688 | 264.5160528 | 264.842136 | 264.8385264 | 264.7414192 | 261.4278824 |
| 264.847232 | 264.7928688 | 264.5190528 | 264.845136 | 264.8415264 | 264.7424192 | 261.4318824 |
| 264.850232 | 264.7968688 | 264.5240528 | 264.846136 | 264.8455264 | 264.7454192 | 261.4348824 |
| 264.853232 | 264.8018688 | 264.5280528 | 264.851136 | 264.8505264 | 264.7464192 | 261.4428824 |
| 264.851232 | 264.7998688 | 264.5300528 | 264.848136 | 264.8475264 | 264.7414192 | 261.4428824 |
| 264.850232 | 264.8008688 | 264.5330528 | 264.846136 | 264.8475264 | 264.7384192 | 261.4458824 |
| 264.850232 | 264.8008688 | 264.5360528 | 264.847136 | 264.8465264 | 264.7284192 | 261.4508824 |
| 264.845232 | 264.8008688 | 264.5380528 | 264.844136 | 264.8465264 | 264.7204192 | 261.4528824 |
| 264.843232 | 264.7978688 | 264.5380528 | 264.841136 | 264.8415264 | 264.7084192 | 261.4528824 |
| 264.840232 | 264.7978688 | 264.5430528 | 264.838136 | 264.8385264 | 264.7024192 | 261.4588824 |
| 264.835232 | 264.7938688 | 264.5460528 | 264.833136 | 264.8345264 | 264.6894192 | 261.4578824 |
| 264.834232 | 264.7928688 | 264.5470528 | 264.831136 | 264.8305264 | 264.6774192 | 261.4578824 |
| 264.831232 | 264.7908688 | 264.5510528 | 264.827136 | 264.8285264 | 264.6694192 | 261.4588824 |
| 264.821232 | 264.7868688 | 264.5500528 | 264.819136 | 264.8215264 | 264.6544192 | 261.4588824 |
| 264.817232 | 264.7818688 | 264.5530528 | 264.811136 | 264.8125264 | 264.6404192 | 261.4598824 |
| 264.809232 | 264.7778688 | 264.5560528 | 264.806136 | 264.8085264 | 264.6254192 | 261.4578824 |
| 264.806232 | 264.7758688 | 264.5580528 | 264.801136 | 264.8045264 | 264.6134192 | 261.4578824 |
| 264.795232 | 264.7658688 | 264.5580528 | 264.791136 | 264.7945264 | 264.5934192 | 261.4558824 |
| 264.791232 | 264.7628688 | 264.5610528 | 264.785136 | 264.7885264 | 264.5814192 | 261.4548824 |
| 264.782232 | 264.7598688 | 264.5580528 | 264.780136 | 264.7845264 | 264.5664192 | 261.4508824 |
| 264.777232 | 264.7538688 | 264.5600528 | 264.772136 | 264.7745264 | 264.5524192 | 261.4498824 |
| 264.771232 | 264.7498688 | 264.5620528 | 264.766136 | 264.7685264 | 264.5414192 | 261.4468824 |
| 264.761232 | 264.7428688 | 264.5620528 | 264.754136 | 264.7575264 | 264.5244192 | 261.4438824 |

|            |             |             |            |             |             |             |
|------------|-------------|-------------|------------|-------------|-------------|-------------|
| 264.756232 | 264.7358688 | 264.5640528 | 264.750136 | 264.7535264 | 264.5094192 | 261.4418824 |
| 264.749232 | 264.7318688 | 264.5630528 | 264.741136 | 264.7475264 | 264.4974192 | 261.4388824 |
| 264.743232 | 264.7278688 | 264.5640528 | 264.737136 | 264.7395264 | 264.4844192 | 261.4358824 |
| 264.736232 | 264.7208688 | 264.5620528 | 264.731136 | 264.7335264 | 264.4724192 | 261.4338824 |
| 264.730232 | 264.7188688 | 264.5640528 | 264.724136 | 264.7265264 | 264.4604192 | 261.4308824 |
| 264.726232 | 264.7118688 | 264.5660528 | 264.719136 | 264.7205264 | 264.4514192 | 261.4268824 |
| 264.717232 | 264.7078688 | 264.5630528 | 264.711136 | 264.7155264 | 264.4394192 | 261.4228824 |
| 264.711232 | 264.7038688 | 264.5650528 | 264.704136 | 264.7085264 | 264.4294192 | 261.4188824 |
| 264.709232 | 264.6988688 | 264.5640528 | 264.701136 | 264.7045264 | 264.4184192 | 261.4148824 |
| 264.703232 | 264.6938688 | 264.5650528 | 264.694136 | 264.6955264 | 264.4084192 | 261.4098824 |
| 264.694232 | 264.6898688 | 264.5640528 | 264.688136 | 264.6875264 | 264.4014192 | 261.4048824 |
| 264.689232 | 264.6838688 | 264.5620528 | 264.681136 | 264.6845264 | 264.3914192 | 261.4018824 |
| 264.684232 | 264.6788688 | 264.5620528 | 264.678136 | 264.6775264 | 264.3834192 | 261.3978824 |
| 264.682232 | 264.6768688 | 264.5650528 | 264.676136 | 264.6765264 | 264.3754192 | 261.3988824 |
| 264.679232 | 264.6718688 | 264.5630528 | 264.671136 | 264.6715264 | 264.3724192 | 261.3938824 |
| 264.672232 | 264.6708688 | 264.5650528 | 264.666136 | 264.6675264 | 264.3644192 | 261.3888824 |
| 264.669232 | 264.6638688 | 264.5610528 | 264.661136 | 264.6625264 | 264.3624192 | 261.3868824 |
| 264.667232 | 264.6618688 | 264.5620528 | 264.657136 | 264.6585264 | 264.3524192 | 261.3818824 |
| 264.664232 | 264.6598688 | 264.5630528 | 264.655136 | 264.6555264 | 264.3504192 | 261.3798824 |
| 264.657232 | 264.6558688 | 264.5600528 | 264.652136 | 264.6515264 | 264.3464192 | 261.3718824 |
| 264.655232 | 264.6538688 | 264.5610528 | 264.649136 | 264.6475264 | 264.3434192 | 261.3678824 |
| 264.653232 | 264.6508688 | 264.5590528 | 264.647136 | 264.6475264 | 264.3394192 | 261.3668824 |
| 264.649232 | 264.6478688 | 264.5570528 | 264.640136 | 264.6415264 | 264.3334192 | 261.3618824 |
| 264.648232 | 264.6458688 | 264.5590528 | 264.637136 | 264.6405264 | 264.3304192 | 261.3598824 |
| 264.644232 | 264.6428688 | 264.5570528 | 264.635136 | 264.6335264 | 264.3244192 | 261.3548824 |
| 264.638232 | 264.6388688 | 264.5550528 | 264.629136 | 264.6305264 | 264.3224192 | 261.3508824 |
| 264.642232 | 264.6398688 | 264.5590528 | 264.632136 | 264.6315264 | 264.3214192 | 261.3518824 |
| 264.636232 | 264.6378688 | 264.5570528 | 264.627136 | 264.6295264 | 264.3174192 | 261.3478824 |
| 264.636232 | 264.6348688 | 264.5560528 | 264.625136 | 264.6255264 | 264.3144192 | 261.3478824 |
| 264.634232 | 264.6328688 | 264.5560528 | 264.625136 | 264.6245264 | 264.3094192 | 261.3448824 |
| 264.627232 | 264.6318688 | 264.5530528 | 264.620136 | 264.6195264 | 264.3064192 | 261.3418824 |
| 264.627232 | 264.6278688 | 264.5560528 | 264.620136 | 264.6195264 | 264.3054192 | 261.3418824 |
| 264.624232 | 264.6248688 | 264.5530528 | 264.617136 | 264.6155264 | 264.3004192 | 261.3348824 |
| 264.623232 | 264.6238688 | 264.5530528 | 264.614136 | 264.6125264 | 264.2984192 | 261.3338824 |
| 264.620232 | 264.6208688 | 264.5510528 | 264.609136 | 264.6095264 | 264.2954192 | 261.3288824 |
| 264.618232 | 264.6188688 | 264.5510528 | 264.609136 | 264.6055264 | 264.2914192 | 261.3288824 |
| 264.616232 | 264.6178688 | 264.5510528 | 264.607136 | 264.6055264 | 264.2904192 | 261.3268824 |
| 264.618232 | 264.6168688 | 264.5530528 | 264.609136 | 264.6055264 | 264.2924192 | 261.3288824 |
| 264.613232 | 264.6138688 | 264.5510528 | 264.604136 | 264.6005264 | 264.2864192 | 261.3268824 |
| 264.613232 | 264.6138688 | 264.5500528 | 264.603136 | 264.5985264 | 264.2864192 | 261.3238824 |
| 264.611232 | 264.6128688 | 264.5510528 | 264.601136 | 264.5985264 | 264.2844192 | 261.3228824 |
| 264.609232 | 264.6108688 | 264.5500528 | 264.596136 | 264.5975264 | 264.2794192 | 261.3178824 |
| 264.606232 | 264.6108688 | 264.5500528 | 264.598136 | 264.5955264 | 264.2794192 | 261.3178824 |
| 264.606232 | 264.6058688 | 264.5500528 | 264.598136 | 264.5935264 | 264.2774192 | 261.3158824 |
| 264.603232 | 264.6048688 | 264.5480528 | 264.595136 | 264.5905264 | 264.2744192 | 261.3148824 |
| 264.604232 | 264.6058688 | 264.5490528 | 264.596136 | 264.5935264 | 264.2734192 | 261.3138824 |
| 264.600232 | 264.6028688 | 264.5460528 | 264.590136 | 264.5885264 | 264.2724192 | 261.3128824 |

|            |             |             |            |             |             |             |
|------------|-------------|-------------|------------|-------------|-------------|-------------|
| 264.599232 | 264.5998688 | 264.5470528 | 264.588136 | 264.5855264 | 264.2684192 | 261.3078824 |
| 264.599232 | 264.5998688 | 264.5470528 | 264.588136 | 264.5835264 | 264.2684192 | 261.3078824 |
| 264.598232 | 264.6008688 | 264.5450528 | 264.587136 | 264.5825264 | 264.2674192 | 261.3078824 |
| 264.595232 | 264.5988688 | 264.5450528 | 264.587136 | 264.5835264 | 264.2654192 | 261.3048824 |
| 264.594232 | 264.5968688 | 264.5450528 | 264.583136 | 264.5805264 | 264.2634192 | 261.3048824 |
| 264.591232 | 264.5938688 | 264.5440528 | 264.582136 | 264.5775264 | 264.2624192 | 261.3008824 |
| 264.589232 | 264.5928688 | 264.5440528 | 264.581136 | 264.5765264 | 264.2594192 | 261.3008824 |
| 264.590232 | 264.5908688 | 264.5410528 | 264.577136 | 264.5745264 | 264.2574192 | 261.2988824 |
| 264.589232 | 264.5908688 | 264.5440528 | 264.580136 | 264.5755264 | 264.2584192 | 261.2998824 |
| 264.585232 | 264.5878688 | 264.5410528 | 264.573136 | 264.5695264 | 264.2564192 | 261.2978824 |
| 264.586232 | 264.5868688 | 264.5420528 | 264.573136 | 264.5725264 | 264.2544192 | 261.2978824 |
| 264.584232 | 264.5868688 | 264.5400528 | 264.575136 | 264.5705264 | 264.2554192 | 261.2958824 |
| 264.583232 | 264.5868688 | 264.5410528 | 264.570136 | 264.5675264 | 264.2534192 | 261.2938824 |
| 264.582232 | 264.5828688 | 264.5380528 | 264.567136 | 264.5685264 | 264.2514192 | 261.2918824 |
| 264.579232 | 264.5838688 | 264.5390528 | 264.570136 | 264.5665264 | 264.2534192 | 261.2938824 |
| 264.579232 | 264.5818688 | 264.5390528 | 264.567136 | 264.5645264 | 264.2514192 | 261.2918824 |
| 264.575232 | 264.5818688 | 264.5390528 | 264.568136 | 264.5655264 | 264.2494192 | 261.2878824 |
| 264.575232 | 264.5808688 | 264.5390528 | 264.567136 | 264.5625264 | 264.2494192 | 261.2898824 |
| 264.574232 | 264.5758688 | 264.5380528 | 264.562136 | 264.5595264 | 264.2444192 | 261.2868824 |
| 264.573232 | 264.5778688 | 264.5380528 | 264.561136 | 264.5585264 | 264.2444192 | 261.2878824 |
| 264.572232 | 264.5748688 | 264.5350528 | 264.561136 | 264.5565264 | 264.2434192 | 261.2838824 |
| 264.568232 | 264.5718688 | 264.5360528 | 264.557136 | 264.5535264 | 264.2404192 | 261.2808824 |
| 264.567232 | 264.5718688 | 264.5340528 | 264.555136 | 264.5515264 | 264.2394192 | 261.2838824 |
| 264.565232 | 264.5698688 | 264.5330528 | 264.554136 | 264.5505264 | 264.2344192 | 261.2808824 |
| 264.563232 | 264.5678688 | 264.5340528 | 264.553136 | 264.5485264 | 264.2354192 | 261.2808824 |
| 264.561232 | 264.5668688 | 264.5340528 | 264.551136 | 264.5465264 | 264.2334192 | 261.2778824 |
| 264.558232 | 264.5648688 | 264.5310528 | 264.548136 | 264.5435264 | 264.2304192 | 261.2758824 |
| 264.560232 | 264.5648688 | 264.5320528 | 264.550136 | 264.5455264 | 264.2294192 | 261.2778824 |
| 264.558232 | 264.5638688 | 264.5310528 | 264.548136 | 264.5435264 | 264.2284192 | 261.2758824 |
| 264.558232 | 264.5648688 | 264.5320528 | 264.546136 | 264.5435264 | 264.2274192 | 261.2758824 |
| 264.554232 | 264.5618688 | 264.5290528 | 264.546136 | 264.5435264 | 264.2264192 | 261.2738824 |
| 264.555232 | 264.5608688 | 264.5290528 | 264.543136 | 264.5405264 | 264.2264192 | 261.2728824 |
| 264.554232 | 264.5598688 | 264.5290528 | 264.543136 | 264.5395264 | 264.2244192 | 261.2728824 |
| 264.555232 | 264.5598688 | 264.5300528 | 264.544136 | 264.5415264 | 264.2254192 | 261.2708824 |
| 264.553232 | 264.5598688 | 264.5290528 | 264.546136 | 264.5395264 | 264.2234192 | 261.2688824 |
| 264.554232 | 264.5598688 | 264.5290528 | 264.544136 | 264.5385264 | 264.2264192 | 261.2688824 |
| 264.555232 | 264.5578688 | 264.5270528 | 264.543136 | 264.5395264 | 264.2244192 | 261.2658824 |
| 264.552232 | 264.5578688 | 264.5260528 | 264.543136 | 264.5385264 | 264.2254192 | 261.2668824 |
| 264.551232 | 264.5578688 | 264.5270528 | 264.542136 | 264.5385264 | 264.2264192 | 261.2668824 |
| 264.553232 | 264.5578688 | 264.5260528 | 264.542136 | 264.5375264 | 264.2264192 | 261.2638824 |
| 264.552232 | 264.5548688 | 264.5250528 | 264.539136 | 264.5365264 | 264.2244192 | 261.2628824 |
| 264.551232 | 264.5578688 | 264.5250528 | 264.542136 | 264.5375264 | 264.2244192 | 261.2628824 |
| 264.554232 | 264.5568688 | 264.5260528 | 264.541136 | 264.5365264 | 264.2274192 | 261.2628824 |
| 264.551232 | 264.5578688 | 264.5240528 | 264.542136 | 264.5375264 | 264.2254192 | 261.2618824 |
| 264.552232 | 264.5578688 | 264.5240528 | 264.541136 | 264.5375264 | 264.2254192 | 261.2618824 |
| 264.549232 | 264.5528688 | 264.5230528 | 264.539136 | 264.5345264 | 264.2244192 | 261.2588824 |
| 264.550232 | 264.5558688 | 264.5260528 | 264.542136 | 264.5375264 | 264.2264192 | 261.2598824 |



|            |             |             |            |             |             |             |
|------------|-------------|-------------|------------|-------------|-------------|-------------|
| 264.546232 | 264.5518688 | 264.5240528 | 264.538136 | 264.5335264 | 264.2234192 | 261.2548824 |
| 264.547232 | 264.5538688 | 264.5230528 | 264.538136 | 264.5335264 | 264.2244192 | 261.2578824 |
| 264.546232 | 264.5518688 | 264.5200528 | 264.535136 | 264.5315264 | 264.2214192 | 261.2548824 |
| 264.545232 | 264.5508688 | 264.5190528 | 264.532136 | 264.5275264 | 264.2184192 | 261.2548824 |
| 264.546232 | 264.5508688 | 264.5200528 | 264.534136 | 264.5265264 | 264.2204192 | 261.2538824 |
| 264.544232 | 264.5518688 | 264.5200528 | 264.533136 | 264.5285264 | 264.2214192 | 261.2568824 |
| 264.543232 | 264.5488688 | 264.5190528 | 264.532136 | 264.5255264 | 264.2204192 | 261.2538824 |
| 264.541232 | 264.5468688 | 264.5190528 | 264.531136 | 264.5265264 | 264.2174192 | 261.2528824 |
| 264.540232 | 264.5458688 | 264.5180528 | 264.530136 | 264.5235264 | 264.2174192 | 261.2548824 |
| 264.541232 | 264.5458688 | 264.5170528 | 264.527136 | 264.5225264 | 264.2184192 | 261.2518824 |
| 264.540232 | 264.5448688 | 264.5160528 | 264.529136 | 264.5235264 | 264.2184192 | 261.2508824 |
| 264.540232 | 264.5448688 | 264.5140528 | 264.528136 | 264.5235264 | 264.2174192 | 261.2528824 |
| 264.540232 | 264.5448688 | 264.5160528 | 264.530136 | 264.5255264 | 264.2154192 | 261.2508824 |
| 264.537232 | 264.5438688 | 264.5150528 | 264.527136 | 264.5245264 | 264.2144192 | 261.2498824 |
| 264.537232 | 264.5428688 | 264.5160528 | 264.526136 | 264.5225264 | 264.2154192 | 261.2498824 |
| 264.538232 | 264.5448688 | 264.5160528 | 264.528136 | 264.5235264 | 264.2184192 | 261.2488824 |
| 264.536232 | 264.5428688 | 264.5160528 | 264.526136 | 264.5215264 | 264.2154192 | 261.2488824 |
| 264.538232 | 264.5428688 | 264.5160528 | 264.528136 | 264.5215264 | 264.2164192 | 261.2478824 |
| 264.538232 | 264.5418688 | 264.5160528 | 264.528136 | 264.5225264 | 264.2154192 | 261.2478824 |
| 264.537232 | 264.5418688 | 264.5130528 | 264.526136 | 264.5205264 | 264.2134192 | 261.2448824 |
| 264.536232 | 264.5418688 | 264.5160528 | 264.526136 | 264.5215264 | 264.2134192 | 261.2488824 |
| 264.537232 | 264.5428688 | 264.5130528 | 264.528136 | 264.5225264 | 264.2134192 | 261.2458824 |
| 264.538232 | 264.5448688 | 264.5150528 | 264.528136 | 264.5215264 | 264.2164192 | 261.2478824 |
| 264.534232 | 264.5378688 | 264.5110528 | 264.523136 | 264.5185264 | 264.2124192 | 261.2428824 |
| 264.536232 | 264.5418688 | 264.5140528 | 264.526136 | 264.5205264 | 264.2134192 | 261.2458824 |
| 264.535232 | 264.5388688 | 264.5110528 | 264.527136 | 264.5185264 | 264.2124192 | 261.2428824 |
| 264.537232 | 264.5398688 | 264.5090528 | 264.523136 | 264.5185264 | 264.2124192 | 261.2418824 |
| 264.536232 | 264.5408688 | 264.5100528 | 264.524136 | 264.5175264 | 264.2114192 | 261.2418824 |
| 264.537232 | 264.5418688 | 264.5130528 | 264.527136 | 264.5225264 | 264.2164192 | 261.2428824 |
| 264.540232 | 264.5428688 | 264.5140528 | 264.529136 | 264.5235264 | 264.2164192 | 261.2408824 |
| 264.538232 | 264.5428688 | 264.5110528 | 264.528136 | 264.5225264 | 264.2174192 | 261.2428824 |
| 264.539232 | 264.5428688 | 264.5130528 | 264.530136 | 264.5225264 | 264.2214192 | 261.2418824 |
| 264.543232 | 264.5438688 | 264.5140528 | 264.531136 | 264.5235264 | 264.2204192 | 261.2428824 |
| 264.542232 | 264.5418688 | 264.5140528 | 264.530136 | 264.5225264 | 264.2224192 | 261.2398824 |
| 264.541232 | 264.5408688 | 264.5090528 | 264.527136 | 264.5205264 | 264.2194192 | 261.2408824 |
| 264.541232 | 264.5418688 | 264.5090528 | 264.527136 | 264.5215264 | 264.2204192 | 261.2398824 |
| 264.539232 | 264.5398688 | 264.5080528 | 264.527136 | 264.5205264 | 264.2214192 | 261.2388824 |
| 264.540232 | 264.5408688 | 264.5090528 | 264.527136 | 264.5215264 | 264.2204192 | 261.2398824 |
| 264.539232 | 264.5408688 | 264.5080528 | 264.526136 | 264.5215264 | 264.2204192 | 261.2398824 |
| 264.537232 | 264.5388688 | 264.5080528 | 264.526136 | 264.5215264 | 264.2204192 | 261.2378824 |
| 264.538232 | 264.5418688 | 264.5110528 | 264.526136 | 264.5205264 | 264.2204192 | 261.2408824 |
| 264.538232 | 264.5398688 | 264.5070528 | 264.526136 | 264.5185264 | 264.2184192 | 261.2408824 |
| 264.536232 | 264.5368688 | 264.5070528 | 264.522136 | 264.5165264 | 264.2164192 | 261.2388824 |
| 264.534232 | 264.5368688 | 264.5070528 | 264.522136 | 264.5165264 | 264.2164192 | 261.2388824 |
| 264.534232 | 264.5348688 | 264.5060528 | 264.520136 | 264.5145264 | 264.2124192 | 261.2388824 |
| 264.533232 | 264.5348688 | 264.5040528 | 264.520136 | 264.5145264 | 264.2154192 | 261.2398824 |
| 264.531232 | 264.5358688 | 264.5040528 | 264.520136 | 264.5145264 | 264.2114192 | 261.2398824 |

|            |             |             |            |             |             |             |
|------------|-------------|-------------|------------|-------------|-------------|-------------|
| 264.533232 | 264.5358688 | 264.5070528 | 264.521136 | 264.5155264 | 264.2134192 | 261.2398824 |
| 264.531232 | 264.5348688 | 264.5050528 | 264.520136 | 264.5145264 | 264.2134192 | 261.2368824 |
| 264.532232 | 264.5338688 | 264.5050528 | 264.518136 | 264.5135264 | 264.2114192 | 261.2398824 |
| 264.530232 | 264.5328688 | 264.5050528 | 264.518136 | 264.5115264 | 264.2114192 | 261.2398824 |
| 264.530232 | 264.5308688 | 264.5030528 | 264.518136 | 264.5115264 | 264.2104192 | 261.2358824 |
| 264.528232 | 264.5288688 | 264.5010528 | 264.517136 | 264.5095264 | 264.2104192 | 261.2358824 |
| 264.525232 | 264.5268688 | 264.5020528 | 264.514136 | 264.5075264 | 264.2084192 | 261.2358824 |
| 264.525232 | 264.5268688 | 264.5000528 | 264.514136 | 264.5055264 | 264.2074192 | 261.2348824 |
| 264.523232 | 264.5268688 | 264.5000528 | 264.514136 | 264.5075264 | 264.2074192 | 261.2348824 |
| 264.522232 | 264.5268688 | 264.4990528 | 264.512136 | 264.5065264 | 264.2054192 | 261.2368824 |
| 264.519232 | 264.5238688 | 264.5000528 | 264.507136 | 264.5035264 | 264.2054192 | 261.2338824 |
| 264.520232 | 264.5248688 | 264.4990528 | 264.508136 | 264.5065264 | 264.2024192 | 261.2328824 |
| 264.521232 | 264.5248688 | 264.4980528 | 264.511136 | 264.5055264 | 264.2034192 | 261.2358824 |
| 264.520232 | 264.5218688 | 264.4990528 | 264.508136 | 264.5045264 | 264.2024192 | 261.2348824 |
| 264.518232 | 264.5238688 | 264.4970528 | 264.508136 | 264.5025264 | 264.2024192 | 261.2348824 |
| 264.519232 | 264.5228688 | 264.4960528 | 264.509136 | 264.5025264 | 264.2014192 | 261.2358824 |
| 264.519232 | 264.5228688 | 264.4980528 | 264.506136 | 264.5015264 | 264.1994192 | 261.2338824 |
| 264.517232 | 264.5218688 | 264.4960528 | 264.506136 | 264.5015264 | 264.1984192 | 261.2308824 |
| 264.517232 | 264.5228688 | 264.4980528 | 264.506136 | 264.5015264 | 264.1974192 | 261.2318824 |
| 264.515232 | 264.5198688 | 264.4980528 | 264.504136 | 264.5005264 | 264.1994192 | 261.2318824 |
| 264.513232 | 264.5198688 | 264.4940528 | 264.503136 | 264.4985264 | 264.1994192 | 261.2308824 |
| 264.511232 | 264.5168688 | 264.4930528 | 264.500136 | 264.4955264 | 264.1974192 | 261.2278824 |
| 264.513232 | 264.5168688 | 264.4930528 | 264.502136 | 264.4975264 | 264.1954192 | 261.2278824 |
| 264.511232 | 264.5158688 | 264.4920528 | 264.498136 | 264.4945264 | 264.1934192 | 261.2268824 |
| 264.510232 | 264.5168688 | 264.4950528 | 264.501136 | 264.4955264 | 264.1934192 | 261.2278824 |
| 264.509232 | 264.5138688 | 264.4920528 | 264.498136 | 264.4945264 | 264.1934192 | 261.2278824 |
| 264.509232 | 264.5158688 | 264.4930528 | 264.500136 | 264.4945264 | 264.1934192 | 261.2278824 |
| 264.508232 | 264.5128688 | 264.4900528 | 264.495136 | 264.4925264 | 264.1924192 | 261.2248824 |
| 264.511232 | 264.5128688 | 264.4920528 | 264.497136 | 264.4925264 | 264.1914192 | 261.2268824 |
| 264.507232 | 264.5128688 | 264.4920528 | 264.497136 | 264.4905264 | 264.1894192 | 261.2248824 |
| 264.509232 | 264.5118688 | 264.4910528 | 264.496136 | 264.4905264 | 264.1914192 | 261.2248824 |
| 264.509232 | 264.5118688 | 264.4910528 | 264.496136 | 264.4905264 | 264.1894192 | 261.2248824 |
| 264.507232 | 264.5108688 | 264.4930528 | 264.495136 | 264.4885264 | 264.1894192 | 261.2258824 |
| 264.504232 | 264.5078688 | 264.4890528 | 264.492136 | 264.4875264 | 264.1884192 | 261.2238824 |
| 264.503232 | 264.5068688 | 264.4870528 | 264.491136 | 264.4865264 | 264.1834192 | 261.2188824 |
| 264.504232 | 264.5098688 | 264.4900528 | 264.491136 | 264.4875264 | 264.1854192 | 261.2218824 |
| 264.503232 | 264.5078688 | 264.4890528 | 264.491136 | 264.4845264 | 264.1854192 | 261.2218824 |
| 264.503232 | 264.5078688 | 264.4870528 | 264.491136 | 264.4845264 | 264.1854192 | 261.2208824 |
| 264.503232 | 264.5078688 | 264.4890528 | 264.491136 | 264.4845264 | 264.1884192 | 261.2218824 |
| 264.502232 | 264.5068688 | 264.4860528 | 264.490136 | 264.4835264 | 264.1824192 | 261.2188824 |
| 264.500232 | 264.5048688 | 264.4860528 | 264.488136 | 264.4835264 | 264.1844192 | 261.2178824 |
| 264.499232 | 264.5068688 | 264.4870528 | 264.489136 | 264.4845264 | 264.1834192 | 261.2188824 |
| 264.500232 | 264.5058688 | 264.4880528 | 264.492136 | 264.4855264 | 264.1844192 | 261.2198824 |
| 264.500232 | 264.5058688 | 264.4880528 | 264.487136 | 264.4835264 | 264.1824192 | 261.2178824 |
| 264.498232 | 264.5048688 | 264.4860528 | 264.487136 | 264.4825264 | 264.1824192 | 261.2178824 |
| 264.500232 | 264.5058688 | 264.4880528 | 264.488136 | 264.4835264 | 264.1824192 | 261.2178824 |
| 264.500232 | 264.5048688 | 264.4880528 | 264.488136 | 264.4815264 | 264.1844192 | 261.2168824 |

|            |             |             |            |             |             |             |
|------------|-------------|-------------|------------|-------------|-------------|-------------|
| 264.497232 | 264.5028688 | 264.4850528 | 264.486136 | 264.4805264 | 264.1814192 | 261.2148824 |
| 264.498232 | 264.5028688 | 264.4860528 | 264.487136 | 264.4825264 | 264.1794192 | 261.2148824 |
| 264.498232 | 264.5038688 | 264.4860528 | 264.485136 | 264.4805264 | 264.1774192 | 261.2148824 |
| 264.495232 | 264.5018688 | 264.4830528 | 264.482136 | 264.4785264 | 264.1794192 | 261.2108824 |
| 264.496232 | 264.5028688 | 264.4840528 | 264.485136 | 264.4795264 | 264.1784192 | 261.2128824 |
| 264.497232 | 264.5028688 | 264.4870528 | 264.487136 | 264.4815264 | 264.1814192 | 261.2148824 |
| 264.496232 | 264.5008688 | 264.4840528 | 264.483136 | 264.4785264 | 264.1804192 | 261.2128824 |
| 264.494232 | 264.4988688 | 264.4840528 | 264.480136 | 264.4785264 | 264.1764192 | 261.2128824 |
| 264.492232 | 264.4958688 | 264.4810528 | 264.480136 | 264.4725264 | 264.1754192 | 261.2098824 |
| 264.492232 | 264.4988688 | 264.4840528 | 264.481136 | 264.4745264 | 264.1764192 | 261.2108824 |
| 264.491232 | 264.4988688 | 264.4850528 | 264.480136 | 264.4735264 | 264.1754192 | 261.2108824 |
| 264.493232 | 264.4988688 | 264.4840528 | 264.481136 | 264.4735264 | 264.1734192 | 261.2118824 |
| 264.491232 | 264.4988688 | 264.4810528 | 264.479136 | 264.4735264 | 264.1734192 | 261.2108824 |
| 264.492232 | 264.4968688 | 264.4820528 | 264.479136 | 264.4745264 | 264.1744192 | 261.2088824 |
| 264.490232 | 264.4968688 | 264.4800528 | 264.477136 | 264.4715264 | 264.1724192 | 261.2098824 |
| 264.490232 | 264.4968688 | 264.4820528 | 264.477136 | 264.4725264 | 264.1724192 | 261.2098824 |
| 264.491232 | 264.4968688 | 264.4810528 | 264.477136 | 264.4705264 | 264.1734192 | 261.2098824 |
| 264.488232 | 264.4948688 | 264.4820528 | 264.476136 | 264.4685264 | 264.1724192 | 261.2108824 |
| 264.489232 | 264.4928688 | 264.4810528 | 264.477136 | 264.4685264 | 264.1734192 | 261.2098824 |
| 264.488232 | 264.4918688 | 264.4780528 | 264.472136 | 264.4685264 | 264.1734192 | 261.2068824 |
| 264.487232 | 264.4948688 | 264.4810528 | 264.475136 | 264.4705264 | 264.1734192 | 261.2078824 |
| 264.484232 | 264.4928688 | 264.4800528 | 264.473136 | 264.4675264 | 264.1724192 | 261.2078824 |
| 264.485232 | 264.4918688 | 264.4790528 | 264.471136 | 264.4655264 | 264.1714192 | 261.2088824 |
| 264.482232 | 264.4908688 | 264.4760528 | 264.471136 | 264.4645264 | 264.1664192 | 261.2058824 |
| 264.482232 | 264.4898688 | 264.4760528 | 264.471136 | 264.4655264 | 264.1684192 | 261.2058824 |
| 264.481232 | 264.4878688 | 264.4780528 | 264.470136 | 264.4645264 | 264.1694192 | 261.2058824 |
| 264.481232 | 264.4878688 | 264.4780528 | 264.470136 | 264.4625264 | 264.1674192 | 261.2058824 |
| 264.480232 | 264.4888688 | 264.4780528 | 264.469136 | 264.4645264 | 264.1664192 | 261.2068824 |
| 264.477232 | 264.4848688 | 264.4770528 | 264.467136 | 264.4625264 | 264.1634192 | 261.2038824 |
| 264.477232 | 264.4858688 | 264.4760528 | 264.465136 | 264.4605264 | 264.1644192 | 261.2038824 |
| 264.478232 | 264.4858688 | 264.4760528 | 264.466136 | 264.4605264 | 264.1644192 | 261.2018824 |
| 264.476232 | 264.4848688 | 264.4760528 | 264.466136 | 264.4605264 | 264.1604192 | 261.2018824 |
| 264.479232 | 264.4858688 | 264.4770528 | 264.467136 | 264.4615264 | 264.1634192 | 261.2038824 |
| 264.474232 | 264.4828688 | 264.4740528 | 264.463136 | 264.4565264 | 264.1624192 | 261.1988824 |
| 264.476232 | 264.4828688 | 264.4740528 | 264.464136 | 264.4565264 | 264.1604192 | 261.1998824 |
| 264.476232 | 264.4828688 | 264.4740528 | 264.463136 | 264.4565264 | 264.1604192 | 261.1998824 |
| 264.472232 | 264.4798688 | 264.4740528 | 264.461136 | 264.4555264 | 264.1624192 | 261.1988824 |
| 264.472232 | 264.4798688 | 264.4720528 | 264.459136 | 264.4535264 | 264.1584192 | 261.1988824 |
| 264.469232 | 264.4778688 | 264.4700528 | 264.456136 | 264.4495264 | 264.1554192 | 261.1938824 |
| 264.471232 | 264.4808688 | 264.4730528 | 264.460136 | 264.4545264 | 264.1574192 | 261.1978824 |
| 264.468232 | 264.4778688 | 264.4700528 | 264.459136 | 264.4515264 | 264.1544192 | 261.1948824 |
| 264.468232 | 264.4758688 | 264.4700528 | 264.456136 | 264.4495264 | 264.1564192 | 261.1968824 |
| 264.469232 | 264.4778688 | 264.4710528 | 264.456136 | 264.4505264 | 264.1534192 | 261.1968824 |
| 264.469232 | 264.4758688 | 264.4710528 | 264.456136 | 264.4485264 | 264.1534192 | 261.1968824 |
| 264.469232 | 264.4768688 | 264.4720528 | 264.458136 | 264.4505264 | 264.1534192 | 261.1948824 |
| 264.468232 | 264.4748688 | 264.4710528 | 264.454136 | 264.4485264 | 264.1534192 | 261.1968824 |
| 264.469232 | 264.4758688 | 264.4720528 | 264.457136 | 264.4505264 | 264.1534192 | 261.1948824 |

|            |             |             |            |             |             |             |
|------------|-------------|-------------|------------|-------------|-------------|-------------|
| 264.469232 | 264.4738688 | 264.4690528 | 264.453136 | 264.4485264 | 264.1534192 | 261.1948824 |
| 264.467232 | 264.4708688 | 264.4690528 | 264.453136 | 264.4465264 | 264.1514192 | 261.1908824 |
| 264.468232 | 264.4738688 | 264.4700528 | 264.455136 | 264.4475264 | 264.1544192 | 261.1958824 |
| 264.467232 | 264.4728688 | 264.4700528 | 264.452136 | 264.4485264 | 264.1534192 | 261.1928824 |
| 264.465232 | 264.4708688 | 264.4670528 | 264.452136 | 264.4455264 | 264.1494192 | 261.1928824 |
| 264.465232 | 264.4728688 | 264.4670528 | 264.452136 | 264.4455264 | 264.1534192 | 261.1928824 |
| 264.464232 | 264.4698688 | 264.4680528 | 264.451136 | 264.4455264 | 264.1544192 | 261.1928824 |
| 264.464232 | 264.4698688 | 264.4680528 | 264.452136 | 264.4455264 | 264.1504192 | 261.1928824 |
| 264.465232 | 264.4698688 | 264.4650528 | 264.451136 | 264.4445264 | 264.1494192 | 261.1938824 |
| 264.465232 | 264.4698688 | 264.4660528 | 264.451136 | 264.4445264 | 264.1474192 | 261.1898824 |
| 264.463232 | 264.4698688 | 264.4670528 | 264.451136 | 264.4445264 | 264.1514192 | 261.1918824 |
| 264.463232 | 264.4698688 | 264.4650528 | 264.450136 | 264.4445264 | 264.1514192 | 261.1888824 |
| 264.462232 | 264.4668688 | 264.4640528 | 264.447136 | 264.4415264 | 264.1504192 | 261.1878824 |
| 264.462232 | 264.4678688 | 264.4640528 | 264.448136 | 264.4435264 | 264.1504192 | 261.1898824 |
| 264.459232 | 264.4658688 | 264.4630528 | 264.447136 | 264.4435264 | 264.1494192 | 261.1878824 |
| 264.458232 | 264.4628688 | 264.4620528 | 264.446136 | 264.4415264 | 264.1464192 | 261.1848824 |
| 264.460232 | 264.4658688 | 264.4610528 | 264.447136 | 264.4405264 | 264.1464192 | 261.1848824 |
| 264.459232 | 264.4658688 | 264.4630528 | 264.445136 | 264.4405264 | 264.1494192 | 261.1868824 |
| 264.460232 | 264.4668688 | 264.4620528 | 264.447136 | 264.4415264 | 264.1484192 | 261.1858824 |
| 264.459232 | 264.4658688 | 264.4620528 | 264.447136 | 264.4405264 | 264.1484192 | 261.1848824 |
| 264.460232 | 264.4668688 | 264.4620528 | 264.450136 | 264.4415264 | 264.1484192 | 261.1858824 |
| 264.460232 | 264.4668688 | 264.4620528 | 264.448136 | 264.4435264 | 264.1494192 | 261.1858824 |
| 264.461232 | 264.4688688 | 264.4630528 | 264.449136 | 264.4425264 | 264.1524192 | 261.1838824 |
| 264.461232 | 264.4668688 | 264.4610528 | 264.448136 | 264.4425264 | 264.1514192 | 261.1858824 |
| 264.461232 | 264.4668688 | 264.4630528 | 264.449136 | 264.4425264 | 264.1544192 | 261.1838824 |
| 264.458232 | 264.4658688 | 264.4580528 | 264.446136 | 264.4415264 | 264.1514192 | 261.1828824 |
| 264.462232 | 264.4698688 | 264.4620528 | 264.446136 | 264.4435264 | 264.1534192 | 261.1828824 |
| 264.462232 | 264.4668688 | 264.4620528 | 264.451136 | 264.4445264 | 264.1554192 | 261.1828824 |
| 264.462232 | 264.4688688 | 264.4600528 | 264.450136 | 264.4445264 | 264.1534192 | 261.1828824 |
| 264.464232 | 264.4688688 | 264.4600528 | 264.452136 | 264.4435264 | 264.1544192 | 261.1808824 |
| 264.466232 | 264.4708688 | 264.4600528 | 264.452136 | 264.4455264 | 264.1554192 | 261.1828824 |
| 264.464232 | 264.4718688 | 264.4620528 | 264.453136 | 264.4475264 | 264.1594192 | 261.1848824 |
| 264.466232 | 264.4718688 | 264.4600528 | 264.453136 | 264.4485264 | 264.1594192 | 261.1808824 |
| 264.465232 | 264.4698688 | 264.4580528 | 264.452136 | 264.4445264 | 264.1574192 | 261.1788824 |
| 264.467232 | 264.4728688 | 264.4620528 | 264.452136 | 264.4475264 | 264.1604192 | 261.1788824 |
| 264.468232 | 264.4728688 | 264.4600528 | 264.454136 | 264.4485264 | 264.1624192 | 261.1808824 |
| 264.469232 | 264.4728688 | 264.4620528 | 264.456136 | 264.4515264 | 264.1644192 | 261.1818824 |
| 264.468232 | 264.4718688 | 264.4570528 | 264.455136 | 264.4485264 | 264.1614192 | 261.1798824 |
| 264.471232 | 264.4758688 | 264.4620528 | 264.459136 | 264.4535264 | 264.1684192 | 261.1818824 |
| 264.473232 | 264.4758688 | 264.4620528 | 264.459136 | 264.4555264 | 264.1684192 | 261.1818824 |
| 264.472232 | 264.4748688 | 264.4610528 | 264.456136 | 264.4525264 | 264.1684192 | 261.1808824 |
| 264.473232 | 264.4738688 | 264.4600528 | 264.459136 | 264.4535264 | 264.1714192 | 261.1818824 |
| 264.471232 | 264.4728688 | 264.4580528 | 264.459136 | 264.4535264 | 264.1664192 | 261.1808824 |
| 264.469232 | 264.4708688 | 264.4570528 | 264.456136 | 264.4505264 | 264.1644192 | 261.1808824 |
| 264.472232 | 264.4738688 | 264.4590528 | 264.459136 | 264.4525264 | 264.1694192 | 261.1828824 |
| 264.472232 | 264.4758688 | 264.4580528 | 264.460136 | 264.4545264 | 264.1674192 | 261.1828824 |
| 264.474232 | 264.4758688 | 264.4590528 | 264.460136 | 264.4555264 | 264.1694192 | 261.1828824 |

|            |             |             |            |             |             |             |
|------------|-------------|-------------|------------|-------------|-------------|-------------|
| 264.474232 | 264.4768688 | 264.4590528 | 264.460136 | 264.4525264 | 264.1704192 | 261.1828824 |
| 264.474232 | 264.4758688 | 264.4570528 | 264.460136 | 264.4555264 | 264.1704192 | 261.1818824 |
| 264.473232 | 264.4768688 | 264.4590528 | 264.461136 | 264.4555264 | 264.1704192 | 261.1828824 |
| 264.473232 | 264.4768688 | 264.4570528 | 264.461136 | 264.4555264 | 264.1724192 | 261.1828824 |
| 264.473232 | 264.4768688 | 264.4580528 | 264.460136 | 264.4555264 | 264.1714192 | 261.1848824 |
| 264.471232 | 264.4748688 | 264.4580528 | 264.459136 | 264.4535264 | 264.1714192 | 261.1858824 |
| 264.471232 | 264.4748688 | 264.4580528 | 264.457136 | 264.4535264 | 264.1694192 | 261.1838824 |
| 264.472232 | 264.4758688 | 264.4580528 | 264.461136 | 264.4545264 | 264.1724192 | 261.1858824 |
| 264.473232 | 264.4758688 | 264.4610528 | 264.460136 | 264.4545264 | 264.1684192 | 261.1868824 |
| 264.472232 | 264.4748688 | 264.4580528 | 264.457136 | 264.4525264 | 264.1694192 | 261.1858824 |
| 264.470232 | 264.4728688 | 264.4560528 | 264.457136 | 264.4515264 | 264.1674192 | 261.1838824 |
| 264.471232 | 264.4758688 | 264.4600528 | 264.462136 | 264.4545264 | 264.1714192 | 261.1878824 |
| 264.468232 | 264.4728688 | 264.4560528 | 264.457136 | 264.4495264 | 264.1674192 | 261.1858824 |
| 264.471232 | 264.4748688 | 264.4570528 | 264.458136 | 264.4525264 | 264.1684192 | 261.1868824 |
| 264.469232 | 264.4748688 | 264.4590528 | 264.457136 | 264.4545264 | 264.1684192 | 261.1868824 |
| 264.468232 | 264.4748688 | 264.4560528 | 264.455136 | 264.4525264 | 264.1664192 | 261.1868824 |
| 264.465232 | 264.4698688 | 264.4550528 | 264.454136 | 264.4485264 | 264.1654192 | 261.1838824 |
| 264.467232 | 264.4728688 | 264.4560528 | 264.456136 | 264.4495264 | 264.1674192 | 261.1858824 |
| 264.467232 | 264.4718688 | 264.4560528 | 264.456136 | 264.4495264 | 264.1654192 | 261.1858824 |
| 264.467232 | 264.4698688 | 264.4540528 | 264.456136 | 264.4495264 | 264.1654192 | 261.1868824 |
| 264.468232 | 264.4698688 | 264.4560528 | 264.453136 | 264.4495264 | 264.1674192 | 261.1858824 |
| 264.466232 | 264.4718688 | 264.4570528 | 264.455136 | 264.4495264 | 264.1664192 | 261.1888824 |
| 264.465232 | 264.4698688 | 264.4550528 | 264.453136 | 264.4485264 | 264.1644192 | 261.1858824 |
| 264.467232 | 264.4718688 | 264.4560528 | 264.453136 | 264.4485264 | 264.1654192 | 261.1858824 |
| 264.464232 | 264.4708688 | 264.4550528 | 264.453136 | 264.4475264 | 264.1644192 | 261.1858824 |
| 264.465232 | 264.4688688 | 264.4560528 | 264.452136 | 264.4455264 | 264.1654192 | 261.1868824 |
| 264.464232 | 264.4698688 | 264.4550528 | 264.452136 | 264.4465264 | 264.1624192 | 261.1858824 |
| 264.464232 | 264.4698688 | 264.4570528 | 264.452136 | 264.4485264 | 264.1624192 | 261.1868824 |
| 264.466232 | 264.4678688 | 264.4540528 | 264.452136 | 264.4465264 | 264.1634192 | 261.1838824 |
| 264.467232 | 264.4698688 | 264.4560528 | 264.453136 | 264.4475264 | 264.1634192 | 261.1858824 |
| 264.465232 | 264.4698688 | 264.4540528 | 264.453136 | 264.4475264 | 264.1644192 | 261.1858824 |
| 264.467232 | 264.4698688 | 264.4540528 | 264.455136 | 264.4475264 | 264.1644192 | 261.1848824 |
| 264.468232 | 264.4708688 | 264.4570528 | 264.455136 | 264.4485264 | 264.1644192 | 261.1828824 |
| 264.468232 | 264.4718688 | 264.4540528 | 264.457136 | 264.4505264 | 264.1654192 | 261.1838824 |
| 264.469232 | 264.4728688 | 264.4540528 | 264.455136 | 264.4505264 | 264.1674192 | 261.1838824 |
| 264.470232 | 264.4728688 | 264.4550528 | 264.456136 | 264.4495264 | 264.1684192 | 261.1828824 |
| 264.473232 | 264.4738688 | 264.4580528 | 264.459136 | 264.4525264 | 264.1694192 | 261.1838824 |
| 264.470232 | 264.4718688 | 264.4540528 | 264.458136 | 264.4515264 | 264.1694192 | 261.1818824 |
| 264.472232 | 264.4748688 | 264.4550528 | 264.459136 | 264.4535264 | 264.1724192 | 261.1818824 |
| 264.477232 | 264.4778688 | 264.4590528 | 264.464136 | 264.4565264 | 264.1744192 | 261.1848824 |
| 264.476232 | 264.4768688 | 264.4560528 | 264.463136 | 264.4575264 | 264.1734192 | 261.1848824 |
| 264.476232 | 264.4768688 | 264.4560528 | 264.463136 | 264.4575264 | 264.1774192 | 261.1798824 |
| 264.476232 | 264.4798688 | 264.4560528 | 264.463136 | 264.4595264 | 264.1774192 | 261.1848824 |
| 264.479232 | 264.4798688 | 264.4560528 | 264.465136 | 264.4595264 | 264.1774192 | 261.1818824 |
| 264.478232 | 264.4798688 | 264.4570528 | 264.466136 | 264.4585264 | 264.1784192 | 261.1838824 |
| 264.478232 | 264.4808688 | 264.4560528 | 264.464136 | 264.4585264 | 264.1804192 | 261.1828824 |
| 264.478232 | 264.4808688 | 264.4580528 | 264.466136 | 264.4605264 | 264.1804192 | 261.1848824 |

|            |             |             |            |             |             |             |
|------------|-------------|-------------|------------|-------------|-------------|-------------|
| 264.479232 | 264.4808688 | 264.4560528 | 264.464136 | 264.4605264 | 264.1804192 | 261.1848824 |
| 264.479232 | 264.4808688 | 264.4580528 | 264.468136 | 264.4605264 | 264.1794192 | 261.1848824 |
| 264.477232 | 264.4808688 | 264.4570528 | 264.463136 | 264.4595264 | 264.1794192 | 261.1868824 |
| 264.479232 | 264.4788688 | 264.4570528 | 264.466136 | 264.4595264 | 264.1794192 | 261.1868824 |
| 264.478232 | 264.4778688 | 264.4580528 | 264.464136 | 264.4585264 | 264.1784192 | 261.1858824 |
| 264.479232 | 264.4808688 | 264.4590528 | 264.466136 | 264.4615264 | 264.1834192 | 261.1898824 |
| 264.479232 | 264.4798688 | 264.4580528 | 264.465136 | 264.4585264 | 264.1804192 | 261.1888824 |
| 264.478232 | 264.4808688 | 264.4590528 | 264.466136 | 264.4615264 | 264.1764192 | 261.1908824 |
| 264.479232 | 264.4818688 | 264.4590528 | 264.466136 | 264.4615264 | 264.1784192 | 261.1908824 |
| 264.481232 | 264.4808688 | 264.4570528 | 264.466136 | 264.4595264 | 264.1804192 | 261.1908824 |
| 264.480232 | 264.4808688 | 264.4590528 | 264.466136 | 264.4595264 | 264.1804192 | 261.1898824 |
| 264.480232 | 264.4808688 | 264.4590528 | 264.468136 | 264.4615264 | 264.1804192 | 261.1908824 |
| 264.479232 | 264.4808688 | 264.4580528 | 264.465136 | 264.4605264 | 264.1814192 | 261.1918824 |
| 264.479232 | 264.4808688 | 264.4580528 | 264.467136 | 264.4585264 | 264.1774192 | 261.1918824 |
| 264.477232 | 264.4798688 | 264.4580528 | 264.465136 | 264.4585264 | 264.1794192 | 261.1918824 |
| 264.477232 | 264.4808688 | 264.4580528 | 264.465136 | 264.4585264 | 264.1774192 | 261.1938824 |
| 264.476232 | 264.4778688 | 264.4590528 | 264.464136 | 264.4595264 | 264.1764192 | 261.1918824 |
| 264.476232 | 264.4798688 | 264.4570528 | 264.465136 | 264.4575264 | 264.1784192 | 261.1908824 |
| 264.479232 | 264.4808688 | 264.4600528 | 264.467136 | 264.4605264 | 264.1794192 | 261.1918824 |
| 264.476232 | 264.4778688 | 264.4570528 | 264.464136 | 264.4575264 | 264.1804192 | 261.1918824 |
| 264.478232 | 264.4798688 | 264.4590528 | 264.464136 | 264.4575264 | 264.1784192 | 261.1938824 |
| 264.474232 | 264.4798688 | 264.4590528 | 264.464136 | 264.4575264 | 264.1784192 | 261.1938824 |
| 264.475232 | 264.4778688 | 264.4570528 | 264.462136 | 264.4565264 | 264.1754192 | 261.1918824 |
| 264.475232 | 264.4778688 | 264.4590528 | 264.461136 | 264.4565264 | 264.1754192 | 261.1918824 |
| 264.473232 | 264.4748688 | 264.4560528 | 264.461136 | 264.4535264 | 264.1734192 | 261.1928824 |
| 264.470232 | 264.4738688 | 264.4550528 | 264.457136 | 264.4515264 | 264.1724192 | 261.1898824 |
| 264.470232 | 264.4738688 | 264.4560528 | 264.458136 | 264.4515264 | 264.1724192 | 261.1908824 |
| 264.467232 | 264.4728688 | 264.4550528 | 264.455136 | 264.4485264 | 264.1714192 | 261.1918824 |
| 264.465232 | 264.4708688 | 264.4530528 | 264.452136 | 264.4455264 | 264.1674192 | 261.1898824 |
| 264.467232 | 264.4728688 | 264.4550528 | 264.455136 | 264.4485264 | 264.1694192 | 261.1898824 |
| 264.465232 | 264.4708688 | 264.4550528 | 264.453136 | 264.4465264 | 264.1694192 | 261.1918824 |
| 264.462232 | 264.4678688 | 264.4550528 | 264.450136 | 264.4425264 | 264.1664192 | 261.1898824 |
| 264.464232 | 264.4668688 | 264.4520528 | 264.448136 | 264.4425264 | 264.1654192 | 261.1888824 |
| 264.464232 | 264.4678688 | 264.4540528 | 264.449136 | 264.4425264 | 264.1634192 | 261.1908824 |
| 264.461232 | 264.4668688 | 264.4540528 | 264.449136 | 264.4425264 | 264.1614192 | 261.1908824 |
| 264.460232 | 264.4668688 | 264.4550528 | 264.449136 | 264.4405264 | 264.1604192 | 261.1898824 |
| 264.459232 | 264.4648688 | 264.4540528 | 264.446136 | 264.4385264 | 264.1594192 | 261.1888824 |
| 264.456232 | 264.4668688 | 264.4540528 | 264.446136 | 264.4405264 | 264.1594192 | 261.1868824 |
| 264.458232 | 264.4638688 | 264.4530528 | 264.446136 | 264.4395264 | 264.1564192 | 261.1878824 |
| 264.457232 | 264.4638688 | 264.4540528 | 264.446136 | 264.4375264 | 264.1564192 | 261.1868824 |
| 264.456232 | 264.4648688 | 264.4550528 | 264.444136 | 264.4385264 | 264.1554192 | 261.1878824 |
| 264.458232 | 264.4648688 | 264.4550528 | 264.446136 | 264.4385264 | 264.1554192 | 261.1868824 |
| 264.455232 | 264.4618688 | 264.4530528 | 264.444136 | 264.4365264 | 264.1524192 | 261.1838824 |
| 264.452232 | 264.4608688 | 264.4510528 | 264.440136 | 264.4325264 | 264.1514192 | 261.1828824 |
| 264.454232 | 264.4608688 | 264.4510528 | 264.438136 | 264.4325264 | 264.1494192 | 261.1828824 |
| 264.452232 | 264.4608688 | 264.4530528 | 264.438136 | 264.4325264 | 264.1514192 | 261.1828824 |
| 264.453232 | 264.4608688 | 264.4540528 | 264.439136 | 264.4335264 | 264.1504192 | 261.1828824 |

|            |             |             |            |             |             |             |
|------------|-------------|-------------|------------|-------------|-------------|-------------|
| 264.450232 | 264.4578688 | 264.4510528 | 264.436136 | 264.4305264 | 264.1474192 | 261.1798824 |
| 264.453232 | 264.4598688 | 264.4540528 | 264.440136 | 264.4315264 | 264.1484192 | 261.1828824 |
| 264.448232 | 264.4568688 | 264.4490528 | 264.436136 | 264.4305264 | 264.1444192 | 261.1808824 |
| 264.448232 | 264.4568688 | 264.4510528 | 264.438136 | 264.4305264 | 264.1454192 | 261.1818824 |
| 264.450232 | 264.4548688 | 264.4510528 | 264.437136 | 264.4305264 | 264.1474192 | 261.1798824 |
| 264.450232 | 264.4568688 | 264.4490528 | 264.436136 | 264.4305264 | 264.1454192 | 261.1798824 |
| 264.448232 | 264.4568688 | 264.4490528 | 264.436136 | 264.4305264 | 264.1454192 | 261.1808824 |
| 264.447232 | 264.4548688 | 264.4500528 | 264.434136 | 264.4295264 | 264.1424192 | 261.1778824 |
| 264.446232 | 264.4538688 | 264.4480528 | 264.435136 | 264.4285264 | 264.1444192 | 261.1778824 |
| 264.447232 | 264.4558688 | 264.4500528 | 264.436136 | 264.4295264 | 264.1444192 | 261.1778824 |
| 264.446232 | 264.4538688 | 264.4490528 | 264.435136 | 264.4285264 | 264.1424192 | 261.1768824 |
| 264.445232 | 264.4538688 | 264.4490528 | 264.434136 | 264.4285264 | 264.1424192 | 261.1768824 |
| 264.448232 | 264.4558688 | 264.4490528 | 264.437136 | 264.4295264 | 264.1434192 | 261.1758824 |
| 264.446232 | 264.4528688 | 264.4490528 | 264.434136 | 264.4265264 | 264.1424192 | 261.1768824 |
| 264.448232 | 264.4538688 | 264.4490528 | 264.435136 | 264.4285264 | 264.1454192 | 261.1758824 |
| 264.446232 | 264.4528688 | 264.4470528 | 264.437136 | 264.4285264 | 264.1464192 | 261.1758824 |
| 264.446232 | 264.4528688 | 264.4470528 | 264.435136 | 264.4285264 | 264.1454192 | 261.1718824 |
| 264.450232 | 264.4538688 | 264.4470528 | 264.437136 | 264.4305264 | 264.1454192 | 261.1748824 |
| 264.449232 | 264.4558688 | 264.4480528 | 264.437136 | 264.4305264 | 264.1464192 | 261.1748824 |
| 264.451232 | 264.4558688 | 264.4480528 | 264.437136 | 264.4305264 | 264.1484192 | 261.1718824 |
| 264.450232 | 264.4538688 | 264.4470528 | 264.438136 | 264.4295264 | 264.1474192 | 261.1728824 |
| 264.450232 | 264.4548688 | 264.4440528 | 264.438136 | 264.4305264 | 264.1474192 | 261.1728824 |
| 264.454232 | 264.4548688 | 264.4470528 | 264.441136 | 264.4335264 | 264.1514192 | 261.1728824 |
| 264.453232 | 264.4558688 | 264.4460528 | 264.442136 | 264.4345264 | 264.1524192 | 261.1728824 |
| 264.454232 | 264.4558688 | 264.4450528 | 264.444136 | 264.4365264 | 264.1544192 | 261.1708824 |
| 264.456232 | 264.4588688 | 264.4460528 | 264.445136 | 264.4365264 | 264.1584192 | 261.1688824 |
| 264.460232 | 264.4618688 | 264.4460528 | 264.449136 | 264.4405264 | 264.1604192 | 261.1688824 |
| 264.461232 | 264.4608688 | 264.4470528 | 264.450136 | 264.4425264 | 264.1604192 | 261.1688824 |
| 264.458232 | 264.4608688 | 264.4460528 | 264.449136 | 264.4405264 | 264.1624192 | 261.1688824 |
| 264.461232 | 264.4638688 | 264.4470528 | 264.452136 | 264.4435264 | 264.1634192 | 261.1708824 |
| 264.464232 | 264.4638688 | 264.4460528 | 264.450136 | 264.4425264 | 264.1644192 | 261.1688824 |
| 264.460232 | 264.4638688 | 264.4460528 | 264.449136 | 264.4425264 | 264.1644192 | 261.1708824 |
| 264.462232 | 264.4628688 | 264.4450528 | 264.451136 | 264.4425264 | 264.1644192 | 261.1708824 |
| 264.462232 | 264.4638688 | 264.4480528 | 264.452136 | 264.4445264 | 264.1664192 | 261.1708824 |
| 264.464232 | 264.4638688 | 264.4470528 | 264.451136 | 264.4445264 | 264.1654192 | 261.1708824 |
| 264.462232 | 264.4638688 | 264.4470528 | 264.453136 | 264.4445264 | 264.1664192 | 261.1728824 |
| 264.463232 | 264.4618688 | 264.4430528 | 264.451136 | 264.4435264 | 264.1654192 | 261.1718824 |
| 264.461232 | 264.4628688 | 264.4470528 | 264.451136 | 264.4435264 | 264.1654192 | 261.1748824 |
| 264.462232 | 264.4658688 | 264.4470528 | 264.453136 | 264.4445264 | 264.1654192 | 261.1748824 |
| 264.459232 | 264.4618688 | 264.4450528 | 264.450136 | 264.4435264 | 264.1654192 | 261.1728824 |
| 264.457232 | 264.4598688 | 264.4450528 | 264.445136 | 264.4385264 | 264.1614192 | 261.1728824 |
| 264.459232 | 264.4608688 | 264.4450528 | 264.448136 | 264.4415264 | 264.1634192 | 261.1758824 |
| 264.457232 | 264.4608688 | 264.4450528 | 264.448136 | 264.4415264 | 264.1624192 | 261.1778824 |
| 264.457232 | 264.4578688 | 264.4450528 | 264.448136 | 264.4395264 | 264.1614192 | 261.1738824 |
| 264.453232 | 264.4568688 | 264.4430528 | 264.444136 | 264.4365264 | 264.1594192 | 261.1748824 |
| 264.455232 | 264.4568688 | 264.4430528 | 264.444136 | 264.4375264 | 264.1594192 | 261.1758824 |
| 264.453232 | 264.4568688 | 264.4410528 | 264.443136 | 264.4375264 | 264.1594192 | 261.1738824 |

|            |             |             |            |             |             |             |
|------------|-------------|-------------|------------|-------------|-------------|-------------|
| 264.452232 | 264.4548688 | 264.4400528 | 264.441136 | 264.4345264 | 264.1564192 | 261.1748824 |
| 264.453232 | 264.4528688 | 264.4410528 | 264.441136 | 264.4355264 | 264.1554192 | 261.1738824 |
| 264.450232 | 264.4548688 | 264.4380528 | 264.443136 | 264.4355264 | 264.1544192 | 261.1738824 |
| 264.452232 | 264.4548688 | 264.4400528 | 264.441136 | 264.4335264 | 264.1564192 | 261.1758824 |
| 264.449232 | 264.4518688 | 264.4370528 | 264.438136 | 264.4325264 | 264.1534192 | 261.1718824 |
| 264.452232 | 264.4528688 | 264.4360528 | 264.439136 | 264.4335264 | 264.1544192 | 261.1738824 |
| 264.451232 | 264.4528688 | 264.4360528 | 264.437136 | 264.4325264 | 264.1554192 | 261.1728824 |
| 264.451232 | 264.4538688 | 264.4390528 | 264.438136 | 264.4315264 | 264.1554192 | 261.1748824 |
| 264.449232 | 264.4528688 | 264.4360528 | 264.438136 | 264.4305264 | 264.1554192 | 261.1728824 |
| 264.449232 | 264.4518688 | 264.4370528 | 264.438136 | 264.4315264 | 264.1554192 | 261.1748824 |
| 264.448232 | 264.4538688 | 264.4370528 | 264.439136 | 264.4335264 | 264.1564192 | 261.1758824 |
| 264.449232 | 264.4508688 | 264.4350528 | 264.437136 | 264.4305264 | 264.1534192 | 261.1708824 |
| 264.446232 | 264.4488688 | 264.4340528 | 264.435136 | 264.4285264 | 264.1524192 | 261.1718824 |
| 264.445232 | 264.4488688 | 264.4340528 | 264.437136 | 264.4285264 | 264.1514192 | 261.1708824 |
| 264.446232 | 264.4478688 | 264.4320528 | 264.433136 | 264.4255264 | 264.1484192 | 261.1698824 |
| 264.446232 | 264.4458688 | 264.4300528 | 264.435136 | 264.4275264 | 264.1484192 | 261.1678824 |
| 264.444232 | 264.4458688 | 264.4310528 | 264.434136 | 264.4275264 | 264.1484192 | 261.1698824 |
| 264.444232 | 264.4458688 | 264.4310528 | 264.432136 | 264.4255264 | 264.1464192 | 261.1688824 |
| 264.447232 | 264.4488688 | 264.4320528 | 264.433136 | 264.4255264 | 264.1474192 | 261.1678824 |
| 264.445232 | 264.4458688 | 264.4320528 | 264.433136 | 264.4265264 | 264.1494192 | 261.1698824 |
| 264.445232 | 264.4468688 | 264.4310528 | 264.433136 | 264.4285264 | 264.1514192 | 261.1708824 |
| 264.442232 | 264.4448688 | 264.4300528 | 264.430136 | 264.4255264 | 264.1474192 | 261.1698824 |
| 264.443232 | 264.4458688 | 264.4310528 | 264.431136 | 264.4245264 | 264.1494192 | 261.1698824 |
| 264.445232 | 264.4458688 | 264.4310528 | 264.431136 | 264.4265264 | 264.1474192 | 261.1698824 |
| 264.443232 | 264.4428688 | 264.4300528 | 264.431136 | 264.4265264 | 264.1514192 | 261.1698824 |
| 264.439232 | 264.4438688 | 264.4310528 | 264.428136 | 264.4225264 | 264.1474192 | 261.1678824 |
| 264.441232 | 264.4458688 | 264.4310528 | 264.431136 | 264.4245264 | 264.1474192 | 261.1708824 |
| 264.440232 | 264.4408688 | 264.4260528 | 264.428136 | 264.4255264 | 264.1444192 | 261.1678824 |
| 264.439232 | 264.4428688 | 264.4300528 | 264.426136 | 264.4225264 | 264.1434192 | 261.1678824 |
| 264.440232 | 264.4408688 | 264.4280528 | 264.428136 | 264.4215264 | 264.1424192 | 261.1668824 |
| 264.438232 | 264.4408688 | 264.4260528 | 264.428136 | 264.4215264 | 264.1424192 | 261.1678824 |
| 264.439232 | 264.4428688 | 264.4280528 | 264.426136 | 264.4215264 | 264.1434192 | 261.1678824 |
| 264.440232 | 264.4408688 | 264.4260528 | 264.427136 | 264.4195264 | 264.1424192 | 261.1678824 |
| 264.437232 | 264.4428688 | 264.4280528 | 264.428136 | 264.4215264 | 264.1424192 | 261.1698824 |
| 264.438232 | 264.4408688 | 264.4260528 | 264.428136 | 264.4195264 | 264.1444192 | 261.1678824 |
| 264.439232 | 264.4438688 | 264.4260528 | 264.428136 | 264.4195264 | 264.1424192 | 261.1678824 |
| 264.438232 | 264.4408688 | 264.4260528 | 264.427136 | 264.4195264 | 264.1424192 | 261.1668824 |
| 264.440232 | 264.4428688 | 264.4260528 | 264.428136 | 264.4215264 | 264.1424192 | 261.1668824 |
| 264.437232 | 264.4428688 | 264.4280528 | 264.428136 | 264.4215264 | 264.1434192 | 261.1678824 |
| 264.443232 | 264.4438688 | 264.4280528 | 264.430136 | 264.4225264 | 264.1434192 | 261.1698824 |
| 264.438232 | 264.4428688 | 264.4250528 | 264.429136 | 264.4205264 | 264.1424192 | 261.1668824 |
| 264.440232 | 264.4428688 | 264.4250528 | 264.429136 | 264.4215264 | 264.1424192 | 261.1668824 |
| 264.441232 | 264.4428688 | 264.4250528 | 264.427136 | 264.4205264 | 264.1414192 | 261.1668824 |
| 264.442232 | 264.4428688 | 264.4250528 | 264.432136 | 264.4235264 | 264.1454192 | 261.1688824 |
| 264.439232 | 264.4438688 | 264.4240528 | 264.431136 | 264.4205264 | 264.1434192 | 261.1668824 |
| 264.440232 | 264.4438688 | 264.4240528 | 264.429136 | 264.4215264 | 264.1444192 | 261.1658824 |
| 264.443232 | 264.4448688 | 264.4260528 | 264.431136 | 264.4215264 | 264.1454192 | 261.1668824 |



|            |             |             |            |             |             |             |
|------------|-------------|-------------|------------|-------------|-------------|-------------|
| 264.442232 | 264.4418688 | 264.4250528 | 264.429136 | 264.4215264 | 264.1444192 | 261.1658824 |
| 264.442232 | 264.4438688 | 264.4270528 | 264.431136 | 264.4215264 | 264.1464192 | 261.1648824 |
| 264.444232 | 264.4458688 | 264.4250528 | 264.431136 | 264.4235264 | 264.1504192 | 261.1658824 |
| 264.445232 | 264.4468688 | 264.4280528 | 264.433136 | 264.4265264 | 264.1514192 | 261.1678824 |
| 264.446232 | 264.4468688 | 264.4270528 | 264.435136 | 264.4265264 | 264.1504192 | 261.1658824 |
| 264.446232 | 264.4468688 | 264.4270528 | 264.433136 | 264.4265264 | 264.1534192 | 261.1678824 |
| 264.446232 | 264.4468688 | 264.4270528 | 264.435136 | 264.4275264 | 264.1504192 | 261.1648824 |
| 264.446232 | 264.4488688 | 264.4270528 | 264.435136 | 264.4285264 | 264.1544192 | 261.1678824 |
| 264.447232 | 264.4478688 | 264.4260528 | 264.434136 | 264.4265264 | 264.1534192 | 261.1638824 |
| 264.447232 | 264.4488688 | 264.4280528 | 264.435136 | 264.4275264 | 264.1544192 | 261.1668824 |
| 264.450232 | 264.4508688 | 264.4280528 | 264.437136 | 264.4305264 | 264.1564192 | 261.1678824 |
| 264.450232 | 264.4538688 | 264.4290528 | 264.438136 | 264.4325264 | 264.1564192 | 261.1698824 |
| 264.449232 | 264.4508688 | 264.4280528 | 264.435136 | 264.4295264 | 264.1554192 | 261.1668824 |
| 264.451232 | 264.4518688 | 264.4300528 | 264.439136 | 264.4315264 | 264.1554192 | 261.1688824 |
| 264.449232 | 264.4488688 | 264.4280528 | 264.437136 | 264.4315264 | 264.1554192 | 261.1668824 |
| 264.451232 | 264.4508688 | 264.4300528 | 264.435136 | 264.4275264 | 264.1564192 | 261.1698824 |
| 264.449232 | 264.4488688 | 264.4300528 | 264.435136 | 264.4295264 | 264.1574192 | 261.1688824 |
| 264.449232 | 264.4508688 | 264.4300528 | 264.435136 | 264.4295264 | 264.1554192 | 261.1688824 |
| 264.446232 | 264.4478688 | 264.4250528 | 264.431136 | 264.4275264 | 264.1524192 | 261.1658824 |
| 264.446232 | 264.4498688 | 264.4290528 | 264.433136 | 264.4275264 | 264.1524192 | 261.1678824 |
| 264.446232 | 264.4478688 | 264.4290528 | 264.434136 | 264.4265264 | 264.1524192 | 261.1688824 |
| 264.446232 | 264.4498688 | 264.4300528 | 264.434136 | 264.4265264 | 264.1534192 | 261.1668824 |
| 264.444232 | 264.4478688 | 264.4290528 | 264.431136 | 264.4245264 | 264.1554192 | 261.1658824 |
| 264.447232 | 264.4478688 | 264.4320528 | 264.432136 | 264.4265264 | 264.1554192 | 261.1698824 |
| 264.444232 | 264.4478688 | 264.4300528 | 264.434136 | 264.4265264 | 264.1534192 | 261.1698824 |
| 264.441232 | 264.4458688 | 264.4270528 | 264.429136 | 264.4235264 | 264.1504192 | 261.1688824 |
| 264.441232 | 264.4428688 | 264.4290528 | 264.429136 | 264.4215264 | 264.1504192 | 261.1688824 |
| 264.441232 | 264.4428688 | 264.4290528 | 264.428136 | 264.4185264 | 264.1484192 | 261.1668824 |
| 264.439232 | 264.4448688 | 264.4290528 | 264.426136 | 264.4195264 | 264.1484192 | 261.1688824 |
| 264.437232 | 264.4428688 | 264.4290528 | 264.426136 | 264.4165264 | 264.1484192 | 261.1708824 |
| 264.439232 | 264.4418688 | 264.4290528 | 264.426136 | 264.4185264 | 264.1484192 | 261.1688824 |
| 264.437232 | 264.4428688 | 264.4310528 | 264.425136 | 264.4185264 | 264.1474192 | 261.1708824 |
| 264.434232 | 264.4398688 | 264.4290528 | 264.421136 | 264.4155264 | 264.1414192 | 261.1688824 |
| 264.435232 | 264.4388688 | 264.4310528 | 264.421136 | 264.4165264 | 264.1434192 | 261.1688824 |
| 264.435232 | 264.4398688 | 264.4310528 | 264.423136 | 264.4145264 | 264.1434192 | 261.1688824 |
| 264.435232 | 264.4418688 | 264.4300528 | 264.424136 | 264.4165264 | 264.1434192 | 261.1688824 |
| 264.433232 | 264.4388688 | 264.4270528 | 264.420136 | 264.4115264 | 264.1394192 | 261.1688824 |
| 264.430232 | 264.4358688 | 264.4260528 | 264.418136 | 264.4105264 | 264.1384192 | 261.1628824 |
| 264.431232 | 264.4388688 | 264.4280528 | 264.423136 | 264.4115264 | 264.1374192 | 261.1668824 |
| 264.431232 | 264.4368688 | 264.4280528 | 264.420136 | 264.4115264 | 264.1374192 | 261.1658824 |
| 264.428232 | 264.4358688 | 264.4290528 | 264.418136 | 264.4095264 | 264.1344192 | 261.1658824 |
| 264.430232 | 264.4348688 | 264.4280528 | 264.418136 | 264.4075264 | 264.1354192 | 261.1658824 |
| 264.426232 | 264.4338688 | 264.4250528 | 264.416136 | 264.4085264 | 264.1324192 | 261.1658824 |
| 264.426232 | 264.4338688 | 264.4270528 | 264.415136 | 264.4085264 | 264.1324192 | 261.1658824 |
| 264.423232 | 264.4308688 | 264.4240528 | 264.412136 | 264.4055264 | 264.1314192 | 261.1628824 |
| 264.426232 | 264.4328688 | 264.4250528 | 264.413136 | 264.4065264 | 264.1304192 | 261.1628824 |
| 264.424232 | 264.4328688 | 264.4250528 | 264.413136 | 264.4045264 | 264.1304192 | 261.1628824 |

|            |             |             |            |             |             |             |
|------------|-------------|-------------|------------|-------------|-------------|-------------|
| 264.424232 | 264.4308688 | 264.4250528 | 264.412136 | 264.4045264 | 264.1294192 | 261.1638824 |
| 264.423232 | 264.4308688 | 264.4270528 | 264.412136 | 264.4035264 | 264.1274192 | 261.1638824 |
| 264.423232 | 264.4308688 | 264.4240528 | 264.410136 | 264.4035264 | 264.1254192 | 261.1628824 |
| 264.421232 | 264.4278688 | 264.4260528 | 264.410136 | 264.4035264 | 264.1254192 | 261.1608824 |
| 264.423232 | 264.4298688 | 264.4260528 | 264.409136 | 264.4015264 | 264.1254192 | 261.1608824 |
| 264.418232 | 264.4278688 | 264.4230528 | 264.407136 | 264.4015264 | 264.1244192 | 261.1598824 |
| 264.421232 | 264.4308688 | 264.4240528 | 264.409136 | 264.4015264 | 264.1244192 | 261.1608824 |
| 264.420232 | 264.4278688 | 264.4230528 | 264.407136 | 264.4015264 | 264.1224192 | 261.1598824 |
| 264.420232 | 264.4278688 | 264.4220528 | 264.407136 | 264.4015264 | 264.1244192 | 261.1598824 |
| 264.420232 | 264.4278688 | 264.4210528 | 264.406136 | 264.4005264 | 264.1224192 | 261.1578824 |
| 264.419232 | 264.4268688 | 264.4230528 | 264.407136 | 264.4005264 | 264.1174192 | 261.1568824 |
| 264.420232 | 264.4278688 | 264.4230528 | 264.406136 | 264.3985264 | 264.1234192 | 261.1588824 |
| 264.420232 | 264.4278688 | 264.4230528 | 264.406136 | 264.3985264 | 264.1214192 | 261.1568824 |
| 264.419232 | 264.4248688 | 264.4210528 | 264.404136 | 264.3975264 | 264.1194192 | 261.1558824 |
| 264.417232 | 264.4248688 | 264.4210528 | 264.404136 | 264.3975264 | 264.1194192 | 261.1558824 |
| 264.419232 | 264.4268688 | 264.4230528 | 264.406136 | 264.3985264 | 264.1194192 | 261.1548824 |
| 264.419232 | 264.4248688 | 264.4230528 | 264.407136 | 264.3985264 | 264.1234192 | 261.1548824 |
| 264.419232 | 264.4248688 | 264.4210528 | 264.408136 | 264.3995264 | 264.1214192 | 261.1558824 |
| 264.421232 | 264.4268688 | 264.4200528 | 264.408136 | 264.3995264 | 264.1234192 | 261.1538824 |
| 264.421232 | 264.4288688 | 264.4220528 | 264.408136 | 264.3995264 | 264.1234192 | 261.1538824 |
| 264.424232 | 264.4298688 | 264.4210528 | 264.409136 | 264.4035264 | 264.1304192 | 261.1588824 |
| 264.423232 | 264.4298688 | 264.4210528 | 264.411136 | 264.4045264 | 264.1304192 | 261.1538824 |
| 264.424232 | 264.4288688 | 264.4210528 | 264.411136 | 264.4045264 | 264.1284192 | 261.1538824 |
| 264.426232 | 264.4298688 | 264.4210528 | 264.413136 | 264.4055264 | 264.1304192 | 261.1518824 |
| 264.428232 | 264.4298688 | 264.4200528 | 264.416136 | 264.4055264 | 264.1324192 | 261.1538824 |
| 264.430232 | 264.4318688 | 264.4210528 | 264.417136 | 264.4095264 | 264.1344192 | 261.1538824 |
| 264.430232 | 264.4328688 | 264.4200528 | 264.419136 | 264.4115264 | 264.1384192 | 261.1508824 |
| 264.435232 | 264.4358688 | 264.4230528 | 264.424136 | 264.4145264 | 264.1414192 | 261.1518824 |
| 264.436232 | 264.4378688 | 264.4220528 | 264.422136 | 264.4145264 | 264.1434192 | 261.1508824 |
| 264.437232 | 264.4398688 | 264.4200528 | 264.424136 | 264.4165264 | 264.1484192 | 261.1528824 |
| 264.439232 | 264.4398688 | 264.4220528 | 264.427136 | 264.4195264 | 264.1484192 | 261.1508824 |
| 264.439232 | 264.4408688 | 264.4220528 | 264.427136 | 264.4195264 | 264.1524192 | 261.1528824 |
| 264.438232 | 264.4378688 | 264.4220528 | 264.428136 | 264.4205264 | 264.1514192 | 261.1508824 |
| 264.440232 | 264.4418688 | 264.4210528 | 264.426136 | 264.4195264 | 264.1504192 | 261.1498824 |
| 264.441232 | 264.4428688 | 264.4220528 | 264.428136 | 264.4215264 | 264.1494192 | 261.1498824 |
| 264.441232 | 264.4428688 | 264.4220528 | 264.431136 | 264.4235264 | 264.1544192 | 261.1528824 |
| 264.439232 | 264.4428688 | 264.4220528 | 264.429136 | 264.4215264 | 264.1524192 | 261.1508824 |
| 264.441232 | 264.4428688 | 264.4240528 | 264.429136 | 264.4215264 | 264.1544192 | 261.1528824 |
| 264.438232 | 264.4408688 | 264.4200528 | 264.428136 | 264.4215264 | 264.1544192 | 261.1528824 |
| 264.440232 | 264.4428688 | 264.4210528 | 264.429136 | 264.4215264 | 264.1534192 | 261.1538824 |
| 264.437232 | 264.4398688 | 264.4200528 | 264.426136 | 264.4195264 | 264.1504192 | 261.1538824 |
| 264.438232 | 264.4388688 | 264.4210528 | 264.427136 | 264.4205264 | 264.1514192 | 261.1548824 |
| 264.440232 | 264.4408688 | 264.4210528 | 264.428136 | 264.4205264 | 264.1514192 | 261.1568824 |
| 264.436232 | 264.4388688 | 264.4210528 | 264.425136 | 264.4185264 | 264.1494192 | 261.1578824 |
| 264.432232 | 264.4358688 | 264.4190528 | 264.422136 | 264.4175264 | 264.1474192 | 261.1568824 |
| 264.434232 | 264.4358688 | 264.4190528 | 264.423136 | 264.4155264 | 264.1474192 | 261.1578824 |
| 264.433232 | 264.4358688 | 264.4180528 | 264.423136 | 264.4165264 | 264.1464192 | 261.1578824 |

|            |             |             |            |             |             |             |
|------------|-------------|-------------|------------|-------------|-------------|-------------|
| 264.433232 | 264.4368688 | 264.4210528 | 264.423136 | 264.4165264 | 264.1484192 | 261.1588824 |
| 264.433232 | 264.4338688 | 264.4180528 | 264.421136 | 264.4125264 | 264.1444192 | 261.1578824 |
| 264.431232 | 264.4338688 | 264.4180528 | 264.421136 | 264.4145264 | 264.1444192 | 261.1588824 |
| 264.431232 | 264.4318688 | 264.4180528 | 264.421136 | 264.4145264 | 264.1424192 | 261.1588824 |
| 264.431232 | 264.4318688 | 264.4180528 | 264.418136 | 264.4125264 | 264.1444192 | 261.1608824 |
| 264.429232 | 264.4308688 | 264.4160528 | 264.418136 | 264.4095264 | 264.1414192 | 261.1578824 |
| 264.430232 | 264.4318688 | 264.4170528 | 264.421136 | 264.4125264 | 264.1404192 | 261.1598824 |
| 264.429232 | 264.4298688 | 264.4150528 | 264.416136 | 264.4105264 | 264.1404192 | 261.1588824 |
| 264.426232 | 264.4298688 | 264.4150528 | 264.415136 | 264.4095264 | 264.1434192 | 261.1578824 |
| 264.429232 | 264.4298688 | 264.4140528 | 264.417136 | 264.4115264 | 264.1394192 | 261.1608824 |
| 264.427232 | 264.4278688 | 264.4160528 | 264.415136 | 264.4075264 | 264.1404192 | 261.1578824 |
| 264.426232 | 264.4288688 | 264.4150528 | 264.414136 | 264.4085264 | 264.1374192 | 261.1588824 |
| 264.424232 | 264.4278688 | 264.4130528 | 264.414136 | 264.4085264 | 264.1374192 | 261.1558824 |
| 264.426232 | 264.4278688 | 264.4110528 | 264.414136 | 264.4085264 | 264.1394192 | 261.1588824 |
| 264.423232 | 264.4258688 | 264.4110528 | 264.413136 | 264.4055264 | 264.1374192 | 261.1558824 |
| 264.424232 | 264.4258688 | 264.4110528 | 264.411136 | 264.4045264 | 264.1374192 | 261.1558824 |
| 264.424232 | 264.4248688 | 264.4090528 | 264.413136 | 264.4035264 | 264.1354192 | 261.1558824 |
| 264.423232 | 264.4258688 | 264.4090528 | 264.412136 | 264.4055264 | 264.1364192 | 261.1568824 |
| 264.420232 | 264.4238688 | 264.4070528 | 264.409136 | 264.4035264 | 264.1354192 | 261.1538824 |
| 264.423232 | 264.4258688 | 264.4090528 | 264.412136 | 264.4045264 | 264.1364192 | 261.1538824 |
| 264.421232 | 264.4238688 | 264.4090528 | 264.411136 | 264.4055264 | 264.1344192 | 261.1538824 |
| 264.419232 | 264.4238688 | 264.4050528 | 264.409136 | 264.4045264 | 264.1344192 | 261.1518824 |
| 264.422232 | 264.4248688 | 264.4070528 | 264.410136 | 264.4055264 | 264.1354192 | 261.1528824 |
| 264.421232 | 264.4238688 | 264.4080528 | 264.410136 | 264.4025264 | 264.1324192 | 261.1528824 |
| 264.421232 | 264.4238688 | 264.4060528 | 264.410136 | 264.4035264 | 264.1344192 | 261.1518824 |
| 264.419232 | 264.4208688 | 264.4050528 | 264.405136 | 264.4045264 | 264.1324192 | 261.1498824 |
| 264.419232 | 264.4208688 | 264.4050528 | 264.405136 | 264.4025264 | 264.1324192 | 261.1498824 |
| 264.420232 | 264.4238688 | 264.4070528 | 264.410136 | 264.4055264 | 264.1314192 | 261.1548824 |
| 264.419232 | 264.4208688 | 264.4040528 | 264.409136 | 264.4025264 | 264.1304192 | 261.1518824 |
| 264.422232 | 264.4238688 | 264.4070528 | 264.410136 | 264.4015264 | 264.1314192 | 261.1548824 |
| 264.419232 | 264.4218688 | 264.4040528 | 264.410136 | 264.4035264 | 264.1324192 | 261.1528824 |
| 264.416232 | 264.4208688 | 264.4030528 | 264.405136 | 264.4005264 | 264.1294192 | 261.1498824 |
| 264.417232 | 264.4208688 | 264.4040528 | 264.407136 | 264.4005264 | 264.1324192 | 261.1528824 |
| 264.419232 | 264.4218688 | 264.4040528 | 264.408136 | 264.4035264 | 264.1324192 | 261.1528824 |
| 264.420232 | 264.4218688 | 264.4040528 | 264.408136 | 264.4015264 | 264.1314192 | 261.1548824 |
| 264.422232 | 264.4248688 | 264.4050528 | 264.409136 | 264.4035264 | 264.1334192 | 261.1558824 |
| 264.422232 | 264.4238688 | 264.4060528 | 264.411136 | 264.4055264 | 264.1334192 | 261.1548824 |
| 264.419232 | 264.4238688 | 264.4040528 | 264.407136 | 264.4025264 | 264.1304192 | 261.1518824 |
| 264.419232 | 264.4228688 | 264.4050528 | 264.407136 | 264.4005264 | 264.1304192 | 261.1528824 |
| 264.421232 | 264.4238688 | 264.4050528 | 264.409136 | 264.4025264 | 264.1324192 | 261.1518824 |
| 264.420232 | 264.4228688 | 264.4050528 | 264.409136 | 264.4045264 | 264.1314192 | 261.1518824 |
| 264.422232 | 264.4228688 | 264.4050528 | 264.409136 | 264.4015264 | 264.1354192 | 261.1538824 |
| 264.423232 | 264.4258688 | 264.4070528 | 264.411136 | 264.4045264 | 264.1344192 | 261.1538824 |
| 264.423232 | 264.4258688 | 264.4070528 | 264.410136 | 264.4045264 | 264.1344192 | 261.1538824 |
| 264.422232 | 264.4258688 | 264.4050528 | 264.410136 | 264.4025264 | 264.1354192 | 261.1518824 |
| 264.422232 | 264.4258688 | 264.4060528 | 264.409136 | 264.4045264 | 264.1334192 | 261.1518824 |
| 264.424232 | 264.4258688 | 264.4060528 | 264.412136 | 264.4045264 | 264.1354192 | 261.1518824 |

|            |             |             |            |             |             |             |
|------------|-------------|-------------|------------|-------------|-------------|-------------|
| 264.427232 | 264.4278688 | 264.4070528 | 264.414136 | 264.4065264 | 264.1374192 | 261.1558824 |
| 264.426232 | 264.4278688 | 264.4080528 | 264.414136 | 264.4065264 | 264.1374192 | 261.1528824 |
| 264.424232 | 264.4258688 | 264.4050528 | 264.411136 | 264.4055264 | 264.1384192 | 261.1528824 |
| 264.426232 | 264.4278688 | 264.4050528 | 264.414136 | 264.4085264 | 264.1384192 | 261.1528824 |
| 264.426232 | 264.4278688 | 264.4060528 | 264.416136 | 264.4085264 | 264.1384192 | 261.1548824 |
| 264.427232 | 264.4278688 | 264.4070528 | 264.415136 | 264.4075264 | 264.1404192 | 261.1518824 |
| 264.427232 | 264.4298688 | 264.4080528 | 264.416136 | 264.4095264 | 264.1404192 | 261.1518824 |
| 264.429232 | 264.4308688 | 264.4080528 | 264.416136 | 264.4105264 | 264.1424192 | 261.1528824 |
| 264.429232 | 264.4318688 | 264.4070528 | 264.418136 | 264.4105264 | 264.1404192 | 261.1518824 |
| 264.431232 | 264.4318688 | 264.4110528 | 264.418136 | 264.4125264 | 264.1464192 | 261.1528824 |
| 264.429232 | 264.4318688 | 264.4070528 | 264.420136 | 264.4135264 | 264.1414192 | 261.1548824 |
| 264.433232 | 264.4348688 | 264.4090528 | 264.420136 | 264.4125264 | 264.1464192 | 261.1548824 |
| 264.432232 | 264.4338688 | 264.4080528 | 264.420136 | 264.4135264 | 264.1434192 | 261.1538824 |
| 264.433232 | 264.4348688 | 264.4110528 | 264.423136 | 264.4145264 | 264.1444192 | 261.1548824 |
| 264.432232 | 264.4348688 | 264.4100528 | 264.423136 | 264.4145264 | 264.1464192 | 261.1548824 |
| 264.434232 | 264.4348688 | 264.4100528 | 264.424136 | 264.4175264 | 264.1454192 | 261.1538824 |
| 264.434232 | 264.4348688 | 264.4100528 | 264.424136 | 264.4155264 | 264.1474192 | 261.1568824 |
| 264.432232 | 264.4348688 | 264.4080528 | 264.422136 | 264.4155264 | 264.1474192 | 261.1568824 |
| 264.435232 | 264.4368688 | 264.4110528 | 264.423136 | 264.4165264 | 264.1504192 | 261.1568824 |
| 264.432232 | 264.4348688 | 264.4100528 | 264.422136 | 264.4155264 | 264.1454192 | 261.1538824 |
| 264.434232 | 264.4348688 | 264.4120528 | 264.422136 | 264.4155264 | 264.1484192 | 261.1588824 |
| 264.432232 | 264.4338688 | 264.4100528 | 264.420136 | 264.4135264 | 264.1454192 | 261.1558824 |
| 264.432232 | 264.4348688 | 264.4100528 | 264.420136 | 264.4135264 | 264.1454192 | 261.1568824 |
| 264.432232 | 264.4318688 | 264.4120528 | 264.419136 | 264.4125264 | 264.1454192 | 261.1558824 |
| 264.429232 | 264.4328688 | 264.4110528 | 264.418136 | 264.4125264 | 264.1444192 | 261.1578824 |
| 264.431232 | 264.4328688 | 264.4110528 | 264.418136 | 264.4125264 | 264.1464192 | 261.1578824 |
| 264.429232 | 264.4328688 | 264.4110528 | 264.418136 | 264.4125264 | 264.1464192 | 261.1608824 |
| 264.431232 | 264.4338688 | 264.4120528 | 264.416136 | 264.4105264 | 264.1464192 | 261.1608824 |
| 264.428232 | 264.4308688 | 264.4130528 | 264.414136 | 264.4115264 | 264.1434192 | 261.1598824 |
| 264.426232 | 264.4298688 | 264.4110528 | 264.413136 | 264.4095264 | 264.1414192 | 261.1598824 |
| 264.426232 | 264.4308688 | 264.4130528 | 264.413136 | 264.4095264 | 264.1434192 | 261.1598824 |
| 264.425232 | 264.4278688 | 264.4110528 | 264.411136 | 264.4065264 | 264.1414192 | 261.1598824 |
| 264.424232 | 264.4278688 | 264.4110528 | 264.411136 | 264.4065264 | 264.1414192 | 261.1608824 |
| 264.423232 | 264.4268688 | 264.4120528 | 264.410136 | 264.4065264 | 264.1384192 | 261.1578824 |
| 264.421232 | 264.4268688 | 264.4120528 | 264.410136 | 264.4045264 | 264.1364192 | 261.1598824 |
| 264.418232 | 264.4248688 | 264.4090528 | 264.405136 | 264.4005264 | 264.1374192 | 261.1588824 |
| 264.420232 | 264.4238688 | 264.4100528 | 264.407136 | 264.4015264 | 264.1354192 | 261.1618824 |
| 264.417232 | 264.4208688 | 264.4080528 | 264.406136 | 264.3995264 | 264.1324192 | 261.1608824 |
| 264.418232 | 264.4208688 | 264.4080528 | 264.403136 | 264.3995264 | 264.1334192 | 261.1578824 |
| 264.414232 | 264.4208688 | 264.4080528 | 264.401136 | 264.3965264 | 264.1294192 | 261.1588824 |
| 264.416232 | 264.4208688 | 264.4080528 | 264.403136 | 264.3965264 | 264.1314192 | 261.1588824 |
| 264.413232 | 264.4198688 | 264.4090528 | 264.402136 | 264.3945264 | 264.1284192 | 261.1568824 |
| 264.413232 | 264.4178688 | 264.4070528 | 264.399136 | 264.3915264 | 264.1264192 | 261.1568824 |
| 264.414232 | 264.4198688 | 264.4080528 | 264.401136 | 264.3945264 | 264.1294192 | 261.1578824 |
| 264.410232 | 264.4198688 | 264.4080528 | 264.398136 | 264.3925264 | 264.1254192 | 261.1558824 |
| 264.409232 | 264.4178688 | 264.4070528 | 264.397136 | 264.3895264 | 264.1244192 | 261.1548824 |
| 264.409232 | 264.4168688 | 264.4050528 | 264.394136 | 264.3885264 | 264.1214192 | 261.1528824 |

|            |             |             |            |             |             |             |
|------------|-------------|-------------|------------|-------------|-------------|-------------|
| 264.409232 | 264.4168688 | 264.4070528 | 264.395136 | 264.3915264 | 264.1234192 | 261.1528824 |
| 264.408232 | 264.4158688 | 264.4040528 | 264.396136 | 264.3865264 | 264.1214192 | 261.1518824 |
| 264.408232 | 264.4158688 | 264.4040528 | 264.394136 | 264.3905264 | 264.1194192 | 261.1518824 |
| 264.410232 | 264.4138688 | 264.4070528 | 264.394136 | 264.3885264 | 264.1214192 | 261.1538824 |
| 264.408232 | 264.4138688 | 264.4070528 | 264.394136 | 264.3865264 | 264.1184192 | 261.1518824 |
| 264.410232 | 264.4138688 | 264.4070528 | 264.394136 | 264.3885264 | 264.1184192 | 261.1518824 |
| 264.407232 | 264.4128688 | 264.4040528 | 264.393136 | 264.3855264 | 264.1184192 | 261.1508824 |
| 264.405232 | 264.4128688 | 264.4040528 | 264.393136 | 264.3855264 | 264.1164192 | 261.1488824 |
| 264.403232 | 264.4108688 | 264.4030528 | 264.391136 | 264.3825264 | 264.1174192 | 261.1488824 |
| 264.405232 | 264.4128688 | 264.4040528 | 264.391136 | 264.3855264 | 264.1164192 | 261.1508824 |
| 264.403232 | 264.4108688 | 264.4050528 | 264.391136 | 264.3825264 | 264.1154192 | 261.1488824 |
| 264.405232 | 264.4108688 | 264.4030528 | 264.389136 | 264.3835264 | 264.1164192 | 261.1488824 |
| 264.403232 | 264.4128688 | 264.4040528 | 264.391136 | 264.3835264 | 264.1144192 | 261.1488824 |
| 264.403232 | 264.4108688 | 264.4040528 | 264.391136 | 264.3815264 | 264.1144192 | 261.1488824 |
| 264.403232 | 264.4108688 | 264.4030528 | 264.391136 | 264.3815264 | 264.1144192 | 261.1468824 |
| 264.403232 | 264.4088688 | 264.4030528 | 264.391136 | 264.3855264 | 264.1134192 | 261.1468824 |
| 264.403232 | 264.4108688 | 264.4030528 | 264.391136 | 264.3855264 | 264.1134192 | 261.1468824 |
| 264.401232 | 264.4088688 | 264.4030528 | 264.389136 | 264.3815264 | 264.1134192 | 261.1468824 |
| 264.403232 | 264.4108688 | 264.4030528 | 264.391136 | 264.3835264 | 264.1134192 | 261.1468824 |
| 264.403232 | 264.4088688 | 264.4030528 | 264.389136 | 264.3815264 | 264.1114192 | 261.1468824 |
| 264.401232 | 264.4058688 | 264.4010528 | 264.391136 | 264.3835264 | 264.1134192 | 261.1458824 |
| 264.403232 | 264.4108688 | 264.4030528 | 264.391136 | 264.3835264 | 264.1134192 | 261.1428824 |
| 264.405232 | 264.4088688 | 264.4040528 | 264.393136 | 264.3835264 | 264.1164192 | 261.1458824 |
| 264.408232 | 264.4118688 | 264.4020528 | 264.394136 | 264.3865264 | 264.1214192 | 261.1458824 |
| 264.408232 | 264.4128688 | 264.4040528 | 264.396136 | 264.3885264 | 264.1204192 | 261.1468824 |
| 264.409232 | 264.4138688 | 264.4030528 | 264.396136 | 264.3895264 | 264.1204192 | 261.1438824 |
| 264.408232 | 264.4128688 | 264.4020528 | 264.396136 | 264.3895264 | 264.1234192 | 261.1448824 |
| 264.409232 | 264.4158688 | 264.4020528 | 264.396136 | 264.3875264 | 264.1264192 | 261.1448824 |
| 264.411232 | 264.4148688 | 264.4040528 | 264.401136 | 264.3915264 | 264.1264192 | 261.1448824 |
| 264.415232 | 264.4198688 | 264.4040528 | 264.408136 | 264.4005264 | 264.1294192 | 261.1428824 |
| 264.423232 | 264.4228688 | 264.4040528 | 264.410136 | 264.4015264 | 264.1324192 | 261.1468824 |
| 264.420232 | 264.4208688 | 264.4030528 | 264.407136 | 264.3995264 | 264.1354192 | 261.1418824 |
| 264.423232 | 264.4238688 | 264.4030528 | 264.412136 | 264.4025264 | 264.1404192 | 261.1438824 |
| 264.423232 | 264.4248688 | 264.4030528 | 264.410136 | 264.4025264 | 264.1404192 | 261.1408824 |
| 264.424232 | 264.4248688 | 264.4040528 | 264.412136 | 264.4035264 | 264.1394192 | 261.1408824 |
| 264.424232 | 264.4258688 | 264.4040528 | 264.414136 | 264.4045264 | 264.1414192 | 261.1398824 |
| 264.428232 | 264.4268688 | 264.4050528 | 264.415136 | 264.4085264 | 264.1464192 | 261.1428824 |
| 264.426232 | 264.4268688 | 264.4060528 | 264.414136 | 264.4065264 | 264.1454192 | 261.1408824 |
| 264.428232 | 264.4298688 | 264.4040528 | 264.419136 | 264.4105264 | 264.1454192 | 261.1428824 |
| 264.430232 | 264.4298688 | 264.4060528 | 264.417136 | 264.4105264 | 264.1454192 | 261.1408824 |
| 264.430232 | 264.4318688 | 264.4060528 | 264.419136 | 264.4115264 | 264.1484192 | 261.1408824 |
| 264.431232 | 264.4308688 | 264.4070528 | 264.419136 | 264.4105264 | 264.1504192 | 261.1428824 |
| 264.428232 | 264.4298688 | 264.4060528 | 264.419136 | 264.4085264 | 264.1484192 | 261.1428824 |
| 264.427232 | 264.4288688 | 264.4030528 | 264.414136 | 264.4075264 | 264.1474192 | 261.1418824 |
| 264.426232 | 264.4298688 | 264.4060528 | 264.417136 | 264.4085264 | 264.1474192 | 261.1448824 |
| 264.427232 | 264.4298688 | 264.4040528 | 264.418136 | 264.4105264 | 264.1474192 | 261.1428824 |
| 264.426232 | 264.4298688 | 264.4040528 | 264.417136 | 264.4105264 | 264.1474192 | 261.1448824 |

|            |             |             |            |             |             |             |
|------------|-------------|-------------|------------|-------------|-------------|-------------|
| 264.426232 | 264.4278688 | 264.4040528 | 264.416136 | 264.4085264 | 264.1454192 | 261.1458824 |
| 264.426232 | 264.4278688 | 264.4040528 | 264.414136 | 264.4085264 | 264.1464192 | 261.1488824 |
| 264.425232 | 264.4298688 | 264.4030528 | 264.415136 | 264.4085264 | 264.1444192 | 261.1488824 |
| 264.422232 | 264.4248688 | 264.4020528 | 264.414136 | 264.4065264 | 264.1434192 | 261.1508824 |
| 264.421232 | 264.4218688 | 264.4020528 | 264.409136 | 264.4035264 | 264.1394192 | 261.1488824 |
| 264.422232 | 264.4228688 | 264.4020528 | 264.411136 | 264.4035264 | 264.1414192 | 261.1488824 |
| 264.420232 | 264.4228688 | 264.4010528 | 264.409136 | 264.4025264 | 264.1404192 | 261.1488824 |
| 264.418232 | 264.4218688 | 264.4010528 | 264.407136 | 264.4015264 | 264.1394192 | 261.1518824 |
| 264.418232 | 264.4208688 | 264.4030528 | 264.409136 | 264.4005264 | 264.1384192 | 261.1518824 |
| 264.418232 | 264.4178688 | 264.3980528 | 264.407136 | 264.3995264 | 264.1364192 | 261.1498824 |
| 264.416232 | 264.4168688 | 264.4010528 | 264.405136 | 264.3975264 | 264.1344192 | 261.1498824 |
| 264.418232 | 264.4178688 | 264.4000528 | 264.408136 | 264.3995264 | 264.1354192 | 261.1528824 |
| 264.418232 | 264.4178688 | 264.4000528 | 264.406136 | 264.3995264 | 264.1354192 | 261.1538824 |
| 264.418232 | 264.4188688 | 264.4010528 | 264.406136 | 264.3995264 | 264.1344192 | 261.1538824 |
| 264.414232 | 264.4158688 | 264.3980528 | 264.404136 | 264.3975264 | 264.1334192 | 261.1528824 |
| 264.412232 | 264.4158688 | 264.3990528 | 264.404136 | 264.3955264 | 264.1334192 | 261.1528824 |
| 264.414232 | 264.4138688 | 264.3970528 | 264.402136 | 264.3975264 | 264.1344192 | 261.1538824 |
| 264.415232 | 264.4158688 | 264.3990528 | 264.404136 | 264.3965264 | 264.1344192 | 261.1518824 |
| 264.416232 | 264.4168688 | 264.3990528 | 264.403136 | 264.3985264 | 264.1334192 | 261.1528824 |
| 264.411232 | 264.4128688 | 264.3950528 | 264.401136 | 264.3915264 | 264.1324192 | 261.1488824 |
| 264.411232 | 264.4138688 | 264.3980528 | 264.402136 | 264.3945264 | 264.1314192 | 261.1498824 |
| 264.409232 | 264.4108688 | 264.3980528 | 264.399136 | 264.3935264 | 264.1304192 | 261.1498824 |
| 264.408232 | 264.4118688 | 264.3990528 | 264.398136 | 264.3925264 | 264.1294192 | 261.1498824 |
| 264.408232 | 264.4098688 | 264.3940528 | 264.398136 | 264.3905264 | 264.1274192 | 261.1498824 |
| 264.407232 | 264.4098688 | 264.3940528 | 264.397136 | 264.3925264 | 264.1274192 | 261.1478824 |
| 264.408232 | 264.4088688 | 264.3950528 | 264.396136 | 264.3905264 | 264.1274192 | 261.1478824 |
| 264.405232 | 264.4088688 | 264.3900528 | 264.393136 | 264.3895264 | 264.1234192 | 261.1448824 |
| 264.409232 | 264.4078688 | 264.3930528 | 264.399136 | 264.3885264 | 264.1264192 | 261.1478824 |
| 264.409232 | 264.4128688 | 264.3940528 | 264.396136 | 264.3895264 | 264.1274192 | 261.1468824 |
| 264.407232 | 264.4098688 | 264.3930528 | 264.394136 | 264.3885264 | 264.1264192 | 261.1488824 |
| 264.405232 | 264.4078688 | 264.3910528 | 264.394136 | 264.3885264 | 264.1264192 | 261.1488824 |
| 264.404232 | 264.4068688 | 264.3910528 | 264.391136 | 264.3865264 | 264.1244192 | 261.1468824 |
| 264.405232 | 264.4098688 | 264.3930528 | 264.394136 | 264.3895264 | 264.1244192 | 261.1488824 |
| 264.405232 | 264.4088688 | 264.3910528 | 264.393136 | 264.3865264 | 264.1264192 | 261.1478824 |
| 264.407232 | 264.4098688 | 264.3910528 | 264.394136 | 264.3875264 | 264.1264192 | 261.1468824 |
| 264.410232 | 264.4128688 | 264.3920528 | 264.397136 | 264.3925264 | 264.1274192 | 261.1488824 |
| 264.410232 | 264.4108688 | 264.3910528 | 264.397136 | 264.3915264 | 264.1294192 | 261.1468824 |
| 264.407232 | 264.4078688 | 264.3890528 | 264.396136 | 264.3885264 | 264.1264192 | 261.1438824 |
| 264.407232 | 264.4108688 | 264.3920528 | 264.397136 | 264.3915264 | 264.1294192 | 261.1458824 |
| 264.407232 | 264.4098688 | 264.3890528 | 264.394136 | 264.3865264 | 264.1274192 | 261.1458824 |
| 264.405232 | 264.4098688 | 264.3910528 | 264.394136 | 264.3885264 | 264.1274192 | 261.1458824 |
| 264.408232 | 264.4108688 | 264.3910528 | 264.397136 | 264.3925264 | 264.1294192 | 261.1468824 |
| 264.408232 | 264.4108688 | 264.3920528 | 264.399136 | 264.3915264 | 264.1294192 | 261.1468824 |
| 264.405232 | 264.4108688 | 264.3910528 | 264.394136 | 264.3885264 | 264.1274192 | 261.1458824 |
| 264.411232 | 264.4108688 | 264.3910528 | 264.394136 | 264.3885264 | 264.1264192 | 261.1438824 |
| 264.407232 | 264.4108688 | 264.3910528 | 264.396136 | 264.3895264 | 264.1274192 | 261.1458824 |
| 264.408232 | 264.4128688 | 264.3910528 | 264.397136 | 264.3915264 | 264.1314192 | 261.1468824 |

|            |             |             |            |             |             |             |
|------------|-------------|-------------|------------|-------------|-------------|-------------|
| 264.411232 | 264.4108688 | 264.3910528 | 264.398136 | 264.3915264 | 264.1294192 | 261.1458824 |
| 264.412232 | 264.4128688 | 264.3930528 | 264.401136 | 264.3925264 | 264.1314192 | 261.1468824 |
| 264.414232 | 264.4158688 | 264.3940528 | 264.402136 | 264.3945264 | 264.1324192 | 261.1468824 |
| 264.411232 | 264.4128688 | 264.3910528 | 264.399136 | 264.3935264 | 264.1304192 | 261.1458824 |
| 264.414232 | 264.4128688 | 264.3930528 | 264.399136 | 264.3915264 | 264.1304192 | 261.1458824 |
| 264.416232 | 264.4158688 | 264.3910528 | 264.402136 | 264.3945264 | 264.1364192 | 261.1468824 |
| 264.414232 | 264.4158688 | 264.3930528 | 264.403136 | 264.3945264 | 264.1354192 | 261.1458824 |
| 264.416232 | 264.4178688 | 264.3930528 | 264.403136 | 264.3965264 | 264.1354192 | 261.1458824 |
| 264.417232 | 264.4178688 | 264.3920528 | 264.406136 | 264.3975264 | 264.1364192 | 261.1478824 |
| 264.416232 | 264.4178688 | 264.3910528 | 264.405136 | 264.3975264 | 264.1344192 | 261.1448824 |
| 264.418232 | 264.4198688 | 264.3940528 | 264.405136 | 264.3995264 | 264.1364192 | 261.1448824 |
| 264.416232 | 264.4188688 | 264.3930528 | 264.407136 | 264.3985264 | 264.1384192 | 261.1468824 |
| 264.420232 | 264.4218688 | 264.3930528 | 264.408136 | 264.3995264 | 264.1384192 | 261.1468824 |
| 264.418232 | 264.4198688 | 264.3930528 | 264.407136 | 264.4005264 | 264.1374192 | 261.1458824 |
| 264.422232 | 264.4228688 | 264.3950528 | 264.410136 | 264.4015264 | 264.1404192 | 261.1488824 |
| 264.422232 | 264.4248688 | 264.3960528 | 264.410136 | 264.4015264 | 264.1404192 | 261.1488824 |
| 264.422232 | 264.4238688 | 264.3950528 | 264.410136 | 264.4015264 | 264.1394192 | 261.1468824 |
| 264.423232 | 264.4228688 | 264.3980528 | 264.412136 | 264.4035264 | 264.1404192 | 261.1488824 |
| 264.424232 | 264.4248688 | 264.3950528 | 264.412136 | 264.4035264 | 264.1414192 | 261.1488824 |
| 264.424232 | 264.4248688 | 264.3970528 | 264.412136 | 264.4035264 | 264.1414192 | 261.1498824 |
| 264.425232 | 264.4248688 | 264.3980528 | 264.413136 | 264.4065264 | 264.1424192 | 261.1518824 |
| 264.427232 | 264.4278688 | 264.3990528 | 264.415136 | 264.4065264 | 264.1434192 | 261.1498824 |
| 264.425232 | 264.4278688 | 264.3980528 | 264.413136 | 264.4065264 | 264.1424192 | 261.1498824 |
| 264.425232 | 264.4258688 | 264.3980528 | 264.413136 | 264.4065264 | 264.1434192 | 261.1518824 |
| 264.423232 | 264.4258688 | 264.3980528 | 264.413136 | 264.4065264 | 264.1424192 | 261.1518824 |
| 264.423232 | 264.4248688 | 264.3960528 | 264.410136 | 264.4045264 | 264.1404192 | 261.1518824 |
| 264.420232 | 264.4248688 | 264.3970528 | 264.409136 | 264.4035264 | 264.1414192 | 261.1498824 |
| 264.422232 | 264.4238688 | 264.3980528 | 264.410136 | 264.4035264 | 264.1414192 | 261.1518824 |
| 264.422232 | 264.4228688 | 264.3980528 | 264.408136 | 264.4035264 | 264.1384192 | 261.1518824 |
| 264.420232 | 264.4228688 | 264.3980528 | 264.410136 | 264.4015264 | 264.1404192 | 261.1518824 |
| 264.418232 | 264.4218688 | 264.4000528 | 264.408136 | 264.4035264 | 264.1384192 | 261.1528824 |
| 264.418232 | 264.4238688 | 264.3980528 | 264.407136 | 264.4015264 | 264.1394192 | 261.1538824 |
| 264.417232 | 264.4208688 | 264.3970528 | 264.406136 | 264.3985264 | 264.1374192 | 261.1538824 |
| 264.415232 | 264.4208688 | 264.3970528 | 264.407136 | 264.3985264 | 264.1374192 | 261.1568824 |
| 264.416232 | 264.4188688 | 264.3970528 | 264.404136 | 264.3975264 | 264.1364192 | 261.1538824 |
| 264.414232 | 264.4188688 | 264.3980528 | 264.404136 | 264.3945264 | 264.1364192 | 261.1558824 |
| 264.414232 | 264.4188688 | 264.3990528 | 264.403136 | 264.3955264 | 264.1364192 | 261.1558824 |
| 264.409232 | 264.4158688 | 264.3950528 | 264.400136 | 264.3905264 | 264.1304192 | 261.1528824 |
| 264.409232 | 264.4158688 | 264.3960528 | 264.398136 | 264.3905264 | 264.1314192 | 261.1558824 |
| 264.407232 | 264.4128688 | 264.3960528 | 264.396136 | 264.3905264 | 264.1274192 | 261.1538824 |
| 264.405232 | 264.4128688 | 264.3960528 | 264.395136 | 264.3855264 | 264.1264192 | 261.1538824 |
| 264.407232 | 264.4108688 | 264.3970528 | 264.396136 | 264.3865264 | 264.1274192 | 261.1538824 |
| 264.405232 | 264.4098688 | 264.3940528 | 264.393136 | 264.3845264 | 264.1264192 | 261.1548824 |
| 264.405232 | 264.4118688 | 264.3940528 | 264.395136 | 264.3835264 | 264.1244192 | 261.1558824 |
| 264.401232 | 264.4068688 | 264.3940528 | 264.391136 | 264.3835264 | 264.1244192 | 261.1538824 |
| 264.401232 | 264.4068688 | 264.3940528 | 264.390136 | 264.3825264 | 264.1224192 | 261.1538824 |
| 264.399232 | 264.4098688 | 264.3970528 | 264.390136 | 264.3835264 | 264.1204192 | 261.1538824 |

|            |             |             |            |             |             |             |
|------------|-------------|-------------|------------|-------------|-------------|-------------|
| 264.399232 | 264.4068688 | 264.3940528 | 264.390136 | 264.3815264 | 264.1204192 | 261.1538824 |
| 264.397232 | 264.4038688 | 264.3940528 | 264.388136 | 264.3805264 | 264.1184192 | 261.1518824 |
| 264.397232 | 264.4038688 | 264.3940528 | 264.388136 | 264.3815264 | 264.1144192 | 261.1518824 |
| 264.396232 | 264.4038688 | 264.3920528 | 264.385136 | 264.3755264 | 264.1154192 | 261.1508824 |
| 264.396232 | 264.4018688 | 264.3930528 | 264.385136 | 264.3775264 | 264.1134192 | 261.1478824 |
| 264.396232 | 264.4038688 | 264.3940528 | 264.385136 | 264.3785264 | 264.1154192 | 261.1528824 |
| 264.395232 | 264.4018688 | 264.3910528 | 264.384136 | 264.3755264 | 264.1124192 | 261.1458824 |
| 264.396232 | 264.4018688 | 264.3940528 | 264.383136 | 264.3765264 | 264.1134192 | 261.1488824 |
| 264.396232 | 264.4038688 | 264.3940528 | 264.385136 | 264.3765264 | 264.1144192 | 261.1478824 |
| 264.396232 | 264.4038688 | 264.3920528 | 264.383136 | 264.3755264 | 264.1134192 | 261.1478824 |
| 264.396232 | 264.4018688 | 264.3920528 | 264.383136 | 264.3755264 | 264.1134192 | 261.1478824 |
| 264.396232 | 264.4038688 | 264.3940528 | 264.383136 | 264.3765264 | 264.1134192 | 261.1458824 |
| 264.396232 | 264.4018688 | 264.3940528 | 264.383136 | 264.3755264 | 264.1114192 | 261.1448824 |
| 264.396232 | 264.3988688 | 264.3930528 | 264.384136 | 264.3735264 | 264.1104192 | 261.1448824 |
| 264.394232 | 264.4018688 | 264.3920528 | 264.382136 | 264.3735264 | 264.1114192 | 261.1428824 |
| 264.396232 | 264.4018688 | 264.3920528 | 264.383136 | 264.3745264 | 264.1114192 | 261.1438824 |
| 264.396232 | 264.4008688 | 264.3910528 | 264.382136 | 264.3735264 | 264.1094192 | 261.1408824 |
| 264.396232 | 264.4018688 | 264.3920528 | 264.382136 | 264.3755264 | 264.1094192 | 261.1408824 |
| 264.394232 | 264.4018688 | 264.3920528 | 264.383136 | 264.3715264 | 264.1094192 | 261.1408824 |
| 264.394232 | 264.4008688 | 264.3920528 | 264.383136 | 264.3715264 | 264.1114192 | 261.1428824 |
| 264.394232 | 264.4008688 | 264.3940528 | 264.383136 | 264.3735264 | 264.1094192 | 261.1428824 |
| 264.394232 | 264.4008688 | 264.3920528 | 264.383136 | 264.3755264 | 264.1094192 | 261.1408824 |
| 264.396232 | 264.4008688 | 264.3920528 | 264.383136 | 264.3755264 | 264.1084192 | 261.1428824 |
| 264.396232 | 264.4018688 | 264.3920528 | 264.383136 | 264.3765264 | 264.1114192 | 261.1408824 |
| 264.396232 | 264.4018688 | 264.3920528 | 264.387136 | 264.3765264 | 264.1094192 | 261.1408824 |
| 264.398232 | 264.4018688 | 264.3890528 | 264.385136 | 264.3765264 | 264.1134192 | 261.1398824 |
| 264.395232 | 264.4018688 | 264.3890528 | 264.385136 | 264.3755264 | 264.1154192 | 261.1398824 |
| 264.398232 | 264.4038688 | 264.3910528 | 264.388136 | 264.3785264 | 264.1154192 | 261.1398824 |
| 264.398232 | 264.4038688 | 264.3910528 | 264.387136 | 264.3785264 | 264.1174192 | 261.1398824 |
| 264.400232 | 264.4038688 | 264.3890528 | 264.392136 | 264.3805264 | 264.1174192 | 261.1368824 |
| 264.402232 | 264.4048688 | 264.3890528 | 264.390136 | 264.3825264 | 264.1214192 | 261.1378824 |
| 264.405232 | 264.4078688 | 264.3910528 | 264.393136 | 264.3855264 | 264.1224192 | 261.1378824 |
| 264.407232 | 264.4098688 | 264.3920528 | 264.396136 | 264.3885264 | 264.1274192 | 261.1358824 |
| 264.409232 | 264.4098688 | 264.3910528 | 264.398136 | 264.3885264 | 264.1294192 | 261.1378824 |
| 264.409232 | 264.4118688 | 264.3890528 | 264.398136 | 264.3895264 | 264.1284192 | 261.1368824 |
| 264.415232 | 264.4158688 | 264.3940528 | 264.403136 | 264.3955264 | 264.1344192 | 261.1358824 |
| 264.419232 | 264.4178688 | 264.3940528 | 264.407136 | 264.3975264 | 264.1364192 | 261.1358824 |
| 264.415232 | 264.4178688 | 264.3940528 | 264.406136 | 264.3975264 | 264.1394192 | 261.1348824 |
| 264.420232 | 264.4218688 | 264.3960528 | 264.409136 | 264.3995264 | 264.1424192 | 261.1358824 |
| 264.417232 | 264.4208688 | 264.3930528 | 264.406136 | 264.4005264 | 264.1414192 | 261.1358824 |
| 264.420232 | 264.4218688 | 264.3950528 | 264.409136 | 264.4005264 | 264.1414192 | 261.1358824 |
| 264.421232 | 264.4188688 | 264.3950528 | 264.411136 | 264.4005264 | 264.1434192 | 261.1358824 |
| 264.419232 | 264.4208688 | 264.3920528 | 264.409136 | 264.4005264 | 264.1424192 | 261.1328824 |
| 264.419232 | 264.4188688 | 264.3940528 | 264.411136 | 264.4005264 | 264.1424192 | 261.1348824 |
| 264.419232 | 264.4208688 | 264.3940528 | 264.408136 | 264.3985264 | 264.1404192 | 261.1358824 |
| 264.420232 | 264.4218688 | 264.3970528 | 264.409136 | 264.4015264 | 264.1444192 | 261.1358824 |
| 264.420232 | 264.4218688 | 264.3950528 | 264.409136 | 264.4015264 | 264.1434192 | 261.1388824 |



|            |             |             |            |             |             |             |
|------------|-------------|-------------|------------|-------------|-------------|-------------|
| 264.420232 | 264.4218688 | 264.3950528 | 264.409136 | 264.4015264 | 264.1414192 | 261.1388824 |
| 264.418232 | 264.4218688 | 264.3950528 | 264.409136 | 264.4015264 | 264.1414192 | 261.1408824 |
| 264.418232 | 264.4188688 | 264.3930528 | 264.407136 | 264.3995264 | 264.1414192 | 261.1408824 |
| 264.420232 | 264.4208688 | 264.3910528 | 264.409136 | 264.4015264 | 264.1384192 | 261.1418824 |
| 264.418232 | 264.4198688 | 264.3920528 | 264.408136 | 264.4005264 | 264.1384192 | 261.1448824 |
| 264.419232 | 264.4198688 | 264.3940528 | 264.408136 | 264.4025264 | 264.1394192 | 261.1468824 |
| 264.417232 | 264.4198688 | 264.3920528 | 264.406136 | 264.4015264 | 264.1414192 | 261.1458824 |
| 264.416232 | 264.4168688 | 264.3930528 | 264.406136 | 264.3995264 | 264.1404192 | 261.1478824 |
| 264.417232 | 264.4188688 | 264.3940528 | 264.407136 | 264.4025264 | 264.1434192 | 261.1518824 |
| 264.415232 | 264.4148688 | 264.3910528 | 264.403136 | 264.3985264 | 264.1394192 | 261.1488824 |
| 264.413232 | 264.4138688 | 264.3900528 | 264.400136 | 264.3935264 | 264.1354192 | 261.1478824 |
| 264.413232 | 264.4148688 | 264.3920528 | 264.404136 | 264.3955264 | 264.1374192 | 261.1498824 |
| 264.413232 | 264.4158688 | 264.3920528 | 264.400136 | 264.3955264 | 264.1354192 | 261.1518824 |
| 264.413232 | 264.4138688 | 264.3900528 | 264.402136 | 264.3965264 | 264.1334192 | 261.1498824 |
| 264.410232 | 264.4118688 | 264.3890528 | 264.400136 | 264.3925264 | 264.1334192 | 261.1498824 |
| 264.410232 | 264.4118688 | 264.3890528 | 264.400136 | 264.3945264 | 264.1314192 | 261.1498824 |
| 264.410232 | 264.4108688 | 264.3890528 | 264.401136 | 264.3945264 | 264.1324192 | 261.1508824 |
| 264.409232 | 264.4098688 | 264.3880528 | 264.397136 | 264.3915264 | 264.1314192 | 261.1498824 |
| 264.408232 | 264.4098688 | 264.3890528 | 264.400136 | 264.3925264 | 264.1304192 | 261.1528824 |
| 264.409232 | 264.4098688 | 264.3880528 | 264.398136 | 264.3905264 | 264.1294192 | 261.1528824 |
| 264.405232 | 264.4078688 | 264.3850528 | 264.398136 | 264.3905264 | 264.1294192 | 261.1508824 |
| 264.407232 | 264.4088688 | 264.3880528 | 264.396136 | 264.3905264 | 264.1274192 | 261.1508824 |
| 264.407232 | 264.4078688 | 264.3840528 | 264.396136 | 264.3905264 | 264.1294192 | 261.1488824 |
| 264.406232 | 264.4088688 | 264.3890528 | 264.397136 | 264.3915264 | 264.1304192 | 261.1508824 |
| 264.405232 | 264.4088688 | 264.3870528 | 264.396136 | 264.3895264 | 264.1304192 | 261.1498824 |
| 264.405232 | 264.4068688 | 264.3870528 | 264.396136 | 264.3905264 | 264.1284192 | 261.1488824 |
| 264.404232 | 264.4038688 | 264.3850528 | 264.392136 | 264.3875264 | 264.1264192 | 261.1488824 |
| 264.405232 | 264.4048688 | 264.3840528 | 264.394136 | 264.3885264 | 264.1274192 | 261.1468824 |
| 264.406232 | 264.4048688 | 264.3850528 | 264.393136 | 264.3875264 | 264.1304192 | 261.1488824 |
| 264.405232 | 264.4048688 | 264.3870528 | 264.395136 | 264.3895264 | 264.1284192 | 261.1488824 |
| 264.402232 | 264.4048688 | 264.3830528 | 264.393136 | 264.3865264 | 264.1264192 | 261.1488824 |
| 264.404232 | 264.4048688 | 264.3870528 | 264.393136 | 264.3875264 | 264.1284192 | 261.1478824 |
| 264.403232 | 264.4048688 | 264.3840528 | 264.393136 | 264.3875264 | 264.1274192 | 261.1468824 |
| 264.400232 | 264.4028688 | 264.3850528 | 264.391136 | 264.3865264 | 264.1264192 | 261.1438824 |
| 264.401232 | 264.4048688 | 264.3860528 | 264.391136 | 264.3855264 | 264.1274192 | 261.1488824 |
| 264.400232 | 264.4018688 | 264.3830528 | 264.390136 | 264.3825264 | 264.1284192 | 261.1478824 |
| 264.400232 | 264.4028688 | 264.3840528 | 264.390136 | 264.3855264 | 264.1264192 | 261.1458824 |
| 264.399232 | 264.4008688 | 264.3840528 | 264.388136 | 264.3835264 | 264.1254192 | 261.1468824 |
| 264.398232 | 264.4018688 | 264.3810528 | 264.386136 | 264.3805264 | 264.1244192 | 261.1458824 |
| 264.402232 | 264.4038688 | 264.3840528 | 264.391136 | 264.3855264 | 264.1254192 | 261.1488824 |
| 264.401232 | 264.4008688 | 264.3840528 | 264.391136 | 264.3815264 | 264.1234192 | 261.1468824 |
| 264.401232 | 264.4008688 | 264.3810528 | 264.389136 | 264.3855264 | 264.1204192 | 261.1458824 |
| 264.402232 | 264.4038688 | 264.3840528 | 264.392136 | 264.3865264 | 264.1234192 | 261.1488824 |
| 264.402232 | 264.4038688 | 264.3840528 | 264.391136 | 264.3865264 | 264.1254192 | 261.1468824 |
| 264.406232 | 264.4058688 | 264.3830528 | 264.392136 | 264.3885264 | 264.1284192 | 261.1468824 |
| 264.406232 | 264.4068688 | 264.3830528 | 264.394136 | 264.3885264 | 264.1284192 | 261.1448824 |
| 264.406232 | 264.4058688 | 264.3830528 | 264.393136 | 264.3885264 | 264.1284192 | 261.1468824 |

|            |             |             |            |             |             |             |
|------------|-------------|-------------|------------|-------------|-------------|-------------|
| 264.409232 | 264.4088688 | 264.3850528 | 264.397136 | 264.3895264 | 264.1294192 | 261.1478824 |
| 264.405232 | 264.4088688 | 264.3860528 | 264.395136 | 264.3875264 | 264.1274192 | 261.1478824 |
| 264.407232 | 264.4088688 | 264.3830528 | 264.395136 | 264.3885264 | 264.1304192 | 261.1468824 |
| 264.407232 | 264.4088688 | 264.3850528 | 264.395136 | 264.3885264 | 264.1304192 | 261.1448824 |
| 264.404232 | 264.4098688 | 264.3870528 | 264.395136 | 264.3895264 | 264.1304192 | 261.1448824 |
| 264.406232 | 264.4078688 | 264.3850528 | 264.394136 | 264.3885264 | 264.1274192 | 261.1438824 |
| 264.406232 | 264.4078688 | 264.3840528 | 264.397136 | 264.3905264 | 264.1304192 | 261.1448824 |
| 264.408232 | 264.4108688 | 264.3840528 | 264.395136 | 264.3905264 | 264.1304192 | 261.1448824 |
| 264.408232 | 264.4088688 | 264.3850528 | 264.398136 | 264.3905264 | 264.1304192 | 261.1438824 |
| 264.408232 | 264.4118688 | 264.3850528 | 264.397136 | 264.3905264 | 264.1304192 | 261.1438824 |
| 264.410232 | 264.4108688 | 264.3850528 | 264.398136 | 264.3935264 | 264.1274192 | 261.1438824 |
| 264.410232 | 264.4128688 | 264.3880528 | 264.400136 | 264.3945264 | 264.1314192 | 261.1458824 |
| 264.414232 | 264.4148688 | 264.3900528 | 264.403136 | 264.3965264 | 264.1324192 | 261.1498824 |
| 264.410232 | 264.4128688 | 264.3860528 | 264.400136 | 264.3945264 | 264.1314192 | 261.1428824 |
| 264.414232 | 264.4148688 | 264.3880528 | 264.403136 | 264.3975264 | 264.1344192 | 261.1478824 |
| 264.414232 | 264.4158688 | 264.3880528 | 264.403136 | 264.3975264 | 264.1344192 | 261.1478824 |
| 264.414232 | 264.4158688 | 264.3880528 | 264.403136 | 264.3995264 | 264.1334192 | 261.1458824 |
| 264.414232 | 264.4148688 | 264.3870528 | 264.405136 | 264.3985264 | 264.1334192 | 261.1448824 |
| 264.416232 | 264.4178688 | 264.3900528 | 264.404136 | 264.3995264 | 264.1364192 | 261.1458824 |
| 264.416232 | 264.4178688 | 264.3900528 | 264.405136 | 264.3995264 | 264.1374192 | 261.1468824 |
| 264.418232 | 264.4198688 | 264.3920528 | 264.408136 | 264.4015264 | 264.1404192 | 261.1468824 |
| 264.419232 | 264.4198688 | 264.3920528 | 264.411136 | 264.4035264 | 264.1384192 | 261.1478824 |
| 264.419232 | 264.4198688 | 264.3930528 | 264.409136 | 264.4035264 | 264.1424192 | 261.1478824 |
| 264.419232 | 264.4208688 | 264.3920528 | 264.409136 | 264.4035264 | 264.1424192 | 261.1478824 |
| 264.421232 | 264.4228688 | 264.3930528 | 264.411136 | 264.4035264 | 264.1424192 | 261.1478824 |
| 264.421232 | 264.4228688 | 264.3930528 | 264.409136 | 264.4045264 | 264.1384192 | 261.1478824 |
| 264.420232 | 264.4208688 | 264.3920528 | 264.409136 | 264.3995264 | 264.1384192 | 261.1478824 |
| 264.421232 | 264.4208688 | 264.3930528 | 264.409136 | 264.4045264 | 264.1394192 | 261.1498824 |
| 264.420232 | 264.4228688 | 264.3930528 | 264.409136 | 264.4025264 | 264.1394192 | 261.1508824 |
| 264.418232 | 264.4208688 | 264.3930528 | 264.407136 | 264.4005264 | 264.1374192 | 261.1488824 |
| 264.419232 | 264.4188688 | 264.3940528 | 264.408136 | 264.4015264 | 264.1384192 | 261.1508824 |
| 264.420232 | 264.4188688 | 264.3940528 | 264.407136 | 264.4015264 | 264.1374192 | 261.1518824 |
| 264.417232 | 264.4208688 | 264.3920528 | 264.407136 | 264.4005264 | 264.1374192 | 261.1518824 |
| 264.416232 | 264.4178688 | 264.3940528 | 264.404136 | 264.3985264 | 264.1374192 | 261.1518824 |
| 264.416232 | 264.4168688 | 264.3950528 | 264.405136 | 264.3995264 | 264.1364192 | 261.1528824 |
| 264.414232 | 264.4168688 | 264.3950528 | 264.402136 | 264.3965264 | 264.1364192 | 261.1548824 |
| 264.414232 | 264.4178688 | 264.3970528 | 264.404136 | 264.3965264 | 264.1354192 | 261.1548824 |
| 264.413232 | 264.4148688 | 264.3940528 | 264.401136 | 264.3935264 | 264.1324192 | 261.1538824 |
| 264.410232 | 264.4118688 | 264.3950528 | 264.398136 | 264.3925264 | 264.1314192 | 261.1558824 |
| 264.411232 | 264.4148688 | 264.3960528 | 264.401136 | 264.3935264 | 264.1324192 | 261.1558824 |
| 264.409232 | 264.4108688 | 264.3940528 | 264.396136 | 264.3905264 | 264.1344192 | 261.1558824 |
| 264.407232 | 264.4088688 | 264.3920528 | 264.395136 | 264.3895264 | 264.1294192 | 261.1508824 |
| 264.405232 | 264.4088688 | 264.3920528 | 264.393136 | 264.3875264 | 264.1294192 | 261.1508824 |
| 264.405232 | 264.4088688 | 264.3910528 | 264.393136 | 264.3875264 | 264.1274192 | 261.1528824 |
| 264.402232 | 264.4078688 | 264.3940528 | 264.394136 | 264.3885264 | 264.1284192 | 261.1558824 |
| 264.401232 | 264.4048688 | 264.3940528 | 264.389136 | 264.3845264 | 264.1264192 | 261.1538824 |
| 264.404232 | 264.4078688 | 264.3950528 | 264.393136 | 264.3855264 | 264.1234192 | 261.1548824 |

|            |             |             |            |             |             |             |
|------------|-------------|-------------|------------|-------------|-------------|-------------|
| 264.399232 | 264.4058688 | 264.3930528 | 264.388136 | 264.3825264 | 264.1214192 | 261.1528824 |
| 264.400232 | 264.4058688 | 264.3950528 | 264.388136 | 264.3825264 | 264.1194192 | 261.1548824 |
| 264.399232 | 264.4028688 | 264.3930528 | 264.387136 | 264.3805264 | 264.1204192 | 261.1518824 |
| 264.398232 | 264.4038688 | 264.3930528 | 264.387136 | 264.3805264 | 264.1234192 | 261.1548824 |
| 264.400232 | 264.4028688 | 264.3930528 | 264.387136 | 264.3805264 | 264.1194192 | 261.1558824 |
| 264.396232 | 264.4018688 | 264.3920528 | 264.385136 | 264.3785264 | 264.1194192 | 261.1538824 |
| 264.398232 | 264.4028688 | 264.3920528 | 264.383136 | 264.3765264 | 264.1154192 | 261.1528824 |
| 264.393232 | 264.3988688 | 264.3880528 | 264.379136 | 264.3715264 | 264.1104192 | 261.1498824 |
| 264.395232 | 264.3998688 | 264.3890528 | 264.380136 | 264.3755264 | 264.1124192 | 261.1498824 |
| 264.395232 | 264.3988688 | 264.3890528 | 264.382136 | 264.3735264 | 264.1124192 | 261.1498824 |
| 264.390232 | 264.3978688 | 264.3860528 | 264.380136 | 264.3715264 | 264.1104192 | 261.1478824 |
| 264.391232 | 264.3968688 | 264.3880528 | 264.379136 | 264.3705264 | 264.1104192 | 261.1478824 |
| 264.395232 | 264.3998688 | 264.3890528 | 264.380136 | 264.3755264 | 264.1144192 | 261.1508824 |
| 264.390232 | 264.3978688 | 264.3860528 | 264.379136 | 264.3705264 | 264.1104192 | 261.1468824 |
| 264.391232 | 264.3978688 | 264.3870528 | 264.380136 | 264.3715264 | 264.1084192 | 261.1468824 |
| 264.393232 | 264.3978688 | 264.3870528 | 264.380136 | 264.3715264 | 264.1084192 | 261.1448824 |
| 264.392232 | 264.3978688 | 264.3890528 | 264.380136 | 264.3725264 | 264.1104192 | 261.1458824 |
| 264.392232 | 264.3958688 | 264.3890528 | 264.378136 | 264.3715264 | 264.1084192 | 261.1458824 |
| 264.390232 | 264.3948688 | 264.3880528 | 264.379136 | 264.3685264 | 264.1094192 | 261.1438824 |
| 264.389232 | 264.3948688 | 264.3860528 | 264.377136 | 264.3695264 | 264.1074192 | 261.1398824 |
| 264.387232 | 264.3928688 | 264.3860528 | 264.375136 | 264.3685264 | 264.1074192 | 261.1378824 |
| 264.390232 | 264.3958688 | 264.3870528 | 264.376136 | 264.3695264 | 264.1074192 | 261.1398824 |
| 264.388232 | 264.3938688 | 264.3850528 | 264.376136 | 264.3695264 | 264.1084192 | 261.1408824 |
| 264.389232 | 264.3938688 | 264.3850528 | 264.375136 | 264.3675264 | 264.1064192 | 261.1378824 |
| 264.388232 | 264.3958688 | 264.3850528 | 264.376136 | 264.3675264 | 264.1064192 | 261.1378824 |
| 264.390232 | 264.3938688 | 264.3860528 | 264.378136 | 264.3705264 | 264.1094192 | 261.1388824 |
| 264.394232 | 264.3968688 | 264.3890528 | 264.381136 | 264.3715264 | 264.1084192 | 261.1388824 |
| 264.391232 | 264.3968688 | 264.3840528 | 264.382136 | 264.3725264 | 264.1094192 | 261.1358824 |
| 264.393232 | 264.3978688 | 264.3860528 | 264.382136 | 264.3725264 | 264.1104192 | 261.1368824 |
| 264.395232 | 264.3988688 | 264.3860528 | 264.383136 | 264.3745264 | 264.1124192 | 261.1368824 |
| 264.397232 | 264.3978688 | 264.3840528 | 264.382136 | 264.3755264 | 264.1144192 | 261.1368824 |
| 264.396232 | 264.3988688 | 264.3860528 | 264.385136 | 264.3775264 | 264.1144192 | 261.1348824 |
| 264.399232 | 264.4008688 | 264.3860528 | 264.387136 | 264.3775264 | 264.1184192 | 261.1348824 |
| 264.402232 | 264.4038688 | 264.3860528 | 264.388136 | 264.3825264 | 264.1194192 | 261.1368824 |
| 264.399232 | 264.4028688 | 264.3850528 | 264.387136 | 264.3795264 | 264.1204192 | 261.1338824 |
| 264.407232 | 264.4058688 | 264.3890528 | 264.393136 | 264.3855264 | 264.1244192 | 261.1368824 |
| 264.407232 | 264.4068688 | 264.3860528 | 264.394136 | 264.3875264 | 264.1304192 | 261.1348824 |
| 264.409232 | 264.4088688 | 264.3850528 | 264.397136 | 264.3895264 | 264.1294192 | 261.1328824 |
| 264.411232 | 264.4108688 | 264.3860528 | 264.402136 | 264.3915264 | 264.1324192 | 261.1328824 |
| 264.413232 | 264.4128688 | 264.3900528 | 264.403136 | 264.3965264 | 264.1384192 | 261.1338824 |
| 264.415232 | 264.4128688 | 264.3900528 | 264.404136 | 264.3955264 | 264.1404192 | 261.1328824 |
| 264.416232 | 264.4148688 | 264.3890528 | 264.404136 | 264.3955264 | 264.1384192 | 261.1308824 |
| 264.417232 | 264.4148688 | 264.3900528 | 264.404136 | 264.3985264 | 264.1404192 | 261.1328824 |
| 264.418232 | 264.4168688 | 264.3910528 | 264.405136 | 264.3995264 | 264.1444192 | 261.1358824 |
| 264.419232 | 264.4168688 | 264.3910528 | 264.405136 | 264.3975264 | 264.1404192 | 261.1308824 |
| 264.421232 | 264.4218688 | 264.3900528 | 264.407136 | 264.4005264 | 264.1434192 | 261.1328824 |
| 264.421232 | 264.4208688 | 264.3940528 | 264.408136 | 264.4045264 | 264.1474192 | 261.1358824 |

|            |             |             |            |             |             |             |
|------------|-------------|-------------|------------|-------------|-------------|-------------|
| 264.419232 | 264.4198688 | 264.3930528 | 264.407136 | 264.3975264 | 264.1444192 | 261.1338824 |
| 264.421232 | 264.4238688 | 264.3960528 | 264.410136 | 264.4025264 | 264.1454192 | 261.1368824 |
| 264.422232 | 264.4208688 | 264.3920528 | 264.408136 | 264.4005264 | 264.1454192 | 261.1388824 |
| 264.421232 | 264.4208688 | 264.3940528 | 264.410136 | 264.4025264 | 264.1434192 | 261.1388824 |
| 264.422232 | 264.4218688 | 264.3940528 | 264.410136 | 264.4025264 | 264.1434192 | 261.1388824 |
| 264.421232 | 264.4178688 | 264.3900528 | 264.406136 | 264.4015264 | 264.1414192 | 261.1388824 |
| 264.421232 | 264.4188688 | 264.3920528 | 264.408136 | 264.4015264 | 264.1404192 | 261.1418824 |
| 264.419232 | 264.4188688 | 264.3930528 | 264.407136 | 264.4035264 | 264.1404192 | 261.1428824 |
| 264.417232 | 264.4178688 | 264.3900528 | 264.405136 | 264.3995264 | 264.1414192 | 261.1418824 |
| 264.418232 | 264.4188688 | 264.3910528 | 264.408136 | 264.4005264 | 264.1414192 | 261.1478824 |
| 264.417232 | 264.4198688 | 264.3920528 | 264.407136 | 264.3995264 | 264.1414192 | 261.1458824 |
| 264.417232 | 264.4178688 | 264.3900528 | 264.406136 | 264.3995264 | 264.1414192 | 261.1478824 |
| 264.416232 | 264.4168688 | 264.3910528 | 264.405136 | 264.3995264 | 264.1374192 | 261.1488824 |
| 264.414232 | 264.4178688 | 264.3910528 | 264.403136 | 264.3975264 | 264.1374192 | 261.1518824 |
| 264.414232 | 264.4168688 | 264.3910528 | 264.403136 | 264.3975264 | 264.1394192 | 261.1498824 |
| 264.414232 | 264.4168688 | 264.3910528 | 264.402136 | 264.3955264 | 264.1394192 | 261.1498824 |
| 264.412232 | 264.4148688 | 264.3880528 | 264.400136 | 264.3955264 | 264.1354192 | 261.1488824 |
| 264.412232 | 264.4138688 | 264.3860528 | 264.399136 | 264.3935264 | 264.1334192 | 261.1488824 |
| 264.413232 | 264.4158688 | 264.3890528 | 264.400136 | 264.3945264 | 264.1344192 | 261.1498824 |
| 264.414232 | 264.4158688 | 264.3920528 | 264.401136 | 264.3975264 | 264.1374192 | 261.1528824 |
| 264.411232 | 264.4128688 | 264.3900528 | 264.399136 | 264.3925264 | 264.1354192 | 261.1528824 |
| 264.411232 | 264.4108688 | 264.3870528 | 264.398136 | 264.3905264 | 264.1324192 | 261.1508824 |
| 264.409232 | 264.4128688 | 264.3900528 | 264.397136 | 264.3925264 | 264.1324192 | 261.1488824 |
| 264.412232 | 264.4128688 | 264.3900528 | 264.399136 | 264.3905264 | 264.1314192 | 261.1518824 |
| 264.409232 | 264.4138688 | 264.3860528 | 264.399136 | 264.3905264 | 264.1294192 | 261.1518824 |
| 264.410232 | 264.4128688 | 264.3880528 | 264.397136 | 264.3915264 | 264.1314192 | 261.1518824 |
| 264.406232 | 264.4108688 | 264.3880528 | 264.397136 | 264.3905264 | 264.1294192 | 261.1518824 |
| 264.409232 | 264.4118688 | 264.3870528 | 264.397136 | 264.3895264 | 264.1304192 | 261.1518824 |
| 264.407232 | 264.4088688 | 264.3890528 | 264.397136 | 264.3925264 | 264.1264192 | 261.1528824 |
| 264.407232 | 264.4088688 | 264.3870528 | 264.395136 | 264.3895264 | 264.1284192 | 261.1518824 |
| 264.406232 | 264.4098688 | 264.3900528 | 264.396136 | 264.3925264 | 264.1314192 | 261.1548824 |
| 264.405232 | 264.4088688 | 264.3880528 | 264.395136 | 264.3875264 | 264.1284192 | 261.1528824 |
| 264.405232 | 264.4088688 | 264.3890528 | 264.395136 | 264.3875264 | 264.1254192 | 261.1518824 |
| 264.404232 | 264.4078688 | 264.3870528 | 264.394136 | 264.3865264 | 264.1274192 | 261.1518824 |
| 264.405232 | 264.4078688 | 264.3880528 | 264.392136 | 264.3845264 | 264.1254192 | 261.1508824 |
| 264.406232 | 264.4088688 | 264.3870528 | 264.394136 | 264.3875264 | 264.1274192 | 261.1518824 |
| 264.405232 | 264.4088688 | 264.3890528 | 264.393136 | 264.3875264 | 264.1264192 | 261.1528824 |
| 264.406232 | 264.4088688 | 264.3870528 | 264.394136 | 264.3865264 | 264.1274192 | 261.1518824 |
| 264.405232 | 264.4078688 | 264.3880528 | 264.396136 | 264.3865264 | 264.1254192 | 261.1508824 |
| 264.405232 | 264.4078688 | 264.3890528 | 264.396136 | 264.3885264 | 264.1274192 | 261.1538824 |
| 264.403232 | 264.4048688 | 264.3880528 | 264.391136 | 264.3855264 | 264.1234192 | 261.1508824 |
| 264.402232 | 264.4058688 | 264.3860528 | 264.393136 | 264.3855264 | 264.1214192 | 261.1488824 |
| 264.402232 | 264.4048688 | 264.3860528 | 264.391136 | 264.3835264 | 264.1234192 | 261.1508824 |
| 264.403232 | 264.4058688 | 264.3860528 | 264.393136 | 264.3855264 | 264.1234192 | 261.1508824 |
| 264.402232 | 264.4068688 | 264.3850528 | 264.393136 | 264.3855264 | 264.1234192 | 261.1498824 |
| 264.402232 | 264.4048688 | 264.3850528 | 264.393136 | 264.3855264 | 264.1274192 | 261.1498824 |
| 264.405232 | 264.4098688 | 264.3880528 | 264.396136 | 264.3885264 | 264.1244192 | 261.1508824 |

|            |             |             |            |             |             |             |
|------------|-------------|-------------|------------|-------------|-------------|-------------|
| 264.404232 | 264.4078688 | 264.3850528 | 264.393136 | 264.3865264 | 264.1254192 | 261.1498824 |
| 264.404232 | 264.4078688 | 264.3870528 | 264.393136 | 264.3865264 | 264.1274192 | 261.1478824 |
| 264.405232 | 264.4088688 | 264.3840528 | 264.393136 | 264.3865264 | 264.1264192 | 261.1478824 |
| 264.405232 | 264.4068688 | 264.3860528 | 264.393136 | 264.3865264 | 264.1264192 | 261.1498824 |
| 264.405232 | 264.4098688 | 264.3860528 | 264.393136 | 264.3895264 | 264.1264192 | 261.1498824 |
| 264.405232 | 264.4088688 | 264.3850528 | 264.392136 | 264.3875264 | 264.1254192 | 261.1468824 |
| 264.407232 | 264.4098688 | 264.3860528 | 264.395136 | 264.3885264 | 264.1264192 | 261.1498824 |
| 264.405232 | 264.4088688 | 264.3880528 | 264.395136 | 264.3905264 | 264.1254192 | 261.1488824 |
| 264.404232 | 264.4078688 | 264.3850528 | 264.392136 | 264.3875264 | 264.1234192 | 261.1458824 |
| 264.406232 | 264.4078688 | 264.3890528 | 264.397136 | 264.3875264 | 264.1234192 | 261.1468824 |
| 264.406232 | 264.4078688 | 264.3870528 | 264.394136 | 264.3875264 | 264.1254192 | 261.1478824 |
| 264.407232 | 264.4078688 | 264.3860528 | 264.393136 | 264.3875264 | 264.1264192 | 261.1478824 |
| 264.407232 | 264.4058688 | 264.3860528 | 264.394136 | 264.3875264 | 264.1264192 | 261.1448824 |
| 264.406232 | 264.4078688 | 264.3870528 | 264.394136 | 264.3875264 | 264.1274192 | 261.1458824 |
| 264.408232 | 264.4088688 | 264.3870528 | 264.394136 | 264.3895264 | 264.1274192 | 261.1478824 |
| 264.408232 | 264.4078688 | 264.3870528 | 264.394136 | 264.3895264 | 264.1254192 | 261.1478824 |
| 264.408232 | 264.4088688 | 264.3870528 | 264.396136 | 264.3915264 | 264.1274192 | 261.1478824 |
| 264.406232 | 264.4078688 | 264.3890528 | 264.397136 | 264.3925264 | 264.1294192 | 261.1458824 |
| 264.409232 | 264.4108688 | 264.3900528 | 264.396136 | 264.3925264 | 264.1304192 | 261.1468824 |
| 264.410232 | 264.4078688 | 264.3870528 | 264.394136 | 264.3895264 | 264.1274192 | 261.1478824 |
| 264.410232 | 264.4108688 | 264.3890528 | 264.394136 | 264.3915264 | 264.1254192 | 261.1458824 |
| 264.410232 | 264.4108688 | 264.3890528 | 264.396136 | 264.3895264 | 264.1294192 | 261.1478824 |
| 264.409232 | 264.4118688 | 264.3900528 | 264.399136 | 264.3905264 | 264.1304192 | 261.1488824 |
| 264.408232 | 264.4088688 | 264.3890528 | 264.397136 | 264.3915264 | 264.1294192 | 261.1488824 |
| 264.409232 | 264.4108688 | 264.3890528 | 264.398136 | 264.3915264 | 264.1244192 | 261.1478824 |
| 264.410232 | 264.4128688 | 264.3880528 | 264.398136 | 264.3915264 | 264.1294192 | 261.1498824 |
| 264.410232 | 264.4128688 | 264.3930528 | 264.398136 | 264.3935264 | 264.1314192 | 261.1478824 |
| 264.409232 | 264.4128688 | 264.3910528 | 264.396136 | 264.3915264 | 264.1284192 | 261.1468824 |
| 264.406232 | 264.4098688 | 264.3870528 | 264.397136 | 264.3905264 | 264.1274192 | 261.1438824 |
| 264.408232 | 264.4098688 | 264.3890528 | 264.395136 | 264.3885264 | 264.1294192 | 261.1468824 |
| 264.408232 | 264.4108688 | 264.3900528 | 264.395136 | 264.3905264 | 264.1304192 | 261.1478824 |
| 264.408232 | 264.4098688 | 264.3900528 | 264.397136 | 264.3885264 | 264.1284192 | 261.1478824 |
| 264.406232 | 264.4098688 | 264.3870528 | 264.394136 | 264.3875264 | 264.1294192 | 261.1468824 |
| 264.410232 | 264.4118688 | 264.3900528 | 264.397136 | 264.3885264 | 264.1294192 | 261.1488824 |
| 264.406232 | 264.4088688 | 264.3910528 | 264.395136 | 264.3885264 | 264.1274192 | 261.1478824 |
| 264.405232 | 264.4068688 | 264.3890528 | 264.391136 | 264.3855264 | 264.1274192 | 261.1478824 |
| 264.405232 | 264.4068688 | 264.3890528 | 264.394136 | 264.3875264 | 264.1244192 | 261.1478824 |
| 264.406232 | 264.4068688 | 264.3900528 | 264.393136 | 264.3855264 | 264.1264192 | 261.1458824 |
| 264.405232 | 264.4078688 | 264.3890528 | 264.394136 | 264.3865264 | 264.1224192 | 261.1458824 |
| 264.403232 | 264.4058688 | 264.3880528 | 264.393136 | 264.3845264 | 264.1234192 | 261.1468824 |
| 264.402232 | 264.4048688 | 264.3860528 | 264.389136 | 264.3825264 | 264.1234192 | 261.1438824 |
| 264.405232 | 264.4058688 | 264.3890528 | 264.392136 | 264.3855264 | 264.1264192 | 261.1468824 |
| 264.403232 | 264.4048688 | 264.3870528 | 264.391136 | 264.3815264 | 264.1244192 | 261.1458824 |
| 264.402232 | 264.4048688 | 264.3880528 | 264.392136 | 264.3835264 | 264.1234192 | 261.1468824 |
| 264.400232 | 264.4038688 | 264.3870528 | 264.388136 | 264.3795264 | 264.1204192 | 261.1478824 |
| 264.399232 | 264.4038688 | 264.3880528 | 264.390136 | 264.3815264 | 264.1244192 | 261.1458824 |
| 264.397232 | 264.4028688 | 264.3880528 | 264.389136 | 264.3785264 | 264.1234192 | 261.1448824 |

|            |             |             |            |             |             |             |
|------------|-------------|-------------|------------|-------------|-------------|-------------|
| 264.398232 | 264.4028688 | 264.3890528 | 264.386136 | 264.3775264 | 264.1244192 | 261.1458824 |
| 264.397232 | 264.4018688 | 264.3860528 | 264.385136 | 264.3765264 | 264.1194192 | 261.1458824 |
| 264.398232 | 264.3998688 | 264.3890528 | 264.386136 | 264.3775264 | 264.1214192 | 261.1458824 |
| 264.398232 | 264.4018688 | 264.3890528 | 264.385136 | 264.3755264 | 264.1214192 | 261.1458824 |
| 264.396232 | 264.3978688 | 264.3860528 | 264.382136 | 264.3735264 | 264.1174192 | 261.1428824 |
| 264.397232 | 264.3988688 | 264.3870528 | 264.383136 | 264.3725264 | 264.1174192 | 261.1458824 |
| 264.397232 | 264.3968688 | 264.3860528 | 264.381136 | 264.3715264 | 264.1164192 | 261.1448824 |
| 264.394232 | 264.3988688 | 264.3870528 | 264.381136 | 264.3745264 | 264.1174192 | 261.1438824 |
| 264.393232 | 264.3968688 | 264.3860528 | 264.380136 | 264.3715264 | 264.1144192 | 261.1448824 |
| 264.392232 | 264.3958688 | 264.3860528 | 264.378136 | 264.3695264 | 264.1164192 | 261.1448824 |
| 264.391232 | 264.3958688 | 264.3850528 | 264.379136 | 264.3705264 | 264.1154192 | 261.1448824 |
| 264.391232 | 264.3958688 | 264.3840528 | 264.378136 | 264.3685264 | 264.1144192 | 261.1418824 |
| 264.392232 | 264.3948688 | 264.3860528 | 264.378136 | 264.3695264 | 264.1124192 | 261.1458824 |
| 264.389232 | 264.3938688 | 264.3850528 | 264.378136 | 264.3665264 | 264.1114192 | 261.1408824 |
| 264.391232 | 264.3938688 | 264.3830528 | 264.375136 | 264.3685264 | 264.1104192 | 261.1428824 |
| 264.388232 | 264.3928688 | 264.3820528 | 264.377136 | 264.3665264 | 264.1124192 | 261.1418824 |
| 264.391232 | 264.3938688 | 264.3850528 | 264.377136 | 264.3665264 | 264.1104192 | 261.1428824 |
| 264.390232 | 264.3928688 | 264.3860528 | 264.377136 | 264.3675264 | 264.1114192 | 261.1418824 |
| 264.390232 | 264.3938688 | 264.3860528 | 264.377136 | 264.3695264 | 264.1134192 | 261.1438824 |
| 264.387232 | 264.3948688 | 264.3830528 | 264.377136 | 264.3675264 | 264.1104192 | 261.1418824 |
| 264.388232 | 264.3918688 | 264.3820528 | 264.375136 | 264.3675264 | 264.1054192 | 261.1378824 |
| 264.387232 | 264.3918688 | 264.3830528 | 264.375136 | 264.3655264 | 264.1084192 | 261.1378824 |
| 264.385232 | 264.3908688 | 264.3830528 | 264.375136 | 264.3645264 | 264.1064192 | 261.1388824 |
| 264.388232 | 264.3928688 | 264.3830528 | 264.375136 | 264.3645264 | 264.1074192 | 261.1368824 |
| 264.389232 | 264.3918688 | 264.3830528 | 264.377136 | 264.3675264 | 264.1084192 | 261.1388824 |
| 264.388232 | 264.3908688 | 264.3830528 | 264.374136 | 264.3665264 | 264.1074192 | 261.1368824 |
| 264.389232 | 264.3928688 | 264.3850528 | 264.374136 | 264.3685264 | 264.1084192 | 261.1368824 |
| 264.388232 | 264.3908688 | 264.3840528 | 264.376136 | 264.3665264 | 264.1074192 | 261.1378824 |
| 264.389232 | 264.3908688 | 264.3840528 | 264.376136 | 264.3655264 | 264.1084192 | 261.1358824 |
| 264.389232 | 264.3898688 | 264.3830528 | 264.373136 | 264.3655264 | 264.1044192 | 261.1358824 |
| 264.388232 | 264.3918688 | 264.3830528 | 264.375136 | 264.3655264 | 264.1054192 | 261.1328824 |
| 264.389232 | 264.3918688 | 264.3830528 | 264.375136 | 264.3675264 | 264.1084192 | 261.1348824 |
| 264.388232 | 264.3918688 | 264.3840528 | 264.375136 | 264.3685264 | 264.1074192 | 261.1338824 |
| 264.385232 | 264.3878688 | 264.3800528 | 264.373136 | 264.3645264 | 264.1054192 | 261.1328824 |
| 264.387232 | 264.3898688 | 264.3830528 | 264.376136 | 264.3665264 | 264.1064192 | 261.1318824 |
| 264.389232 | 264.3928688 | 264.3830528 | 264.377136 | 264.3685264 | 264.1084192 | 261.1338824 |
| 264.392232 | 264.3918688 | 264.3830528 | 264.375136 | 264.3675264 | 264.1114192 | 261.1338824 |
| 264.392232 | 264.3948688 | 264.3830528 | 264.380136 | 264.3705264 | 264.1114192 | 261.1338824 |
| 264.392232 | 264.3948688 | 264.3830528 | 264.380136 | 264.3705264 | 264.1144192 | 261.1338824 |
| 264.392232 | 264.3948688 | 264.3830528 | 264.380136 | 264.3705264 | 264.1124192 | 261.1338824 |
| 264.394232 | 264.3948688 | 264.3840528 | 264.380136 | 264.3725264 | 264.1144192 | 261.1328824 |
| 264.393232 | 264.3918688 | 264.3830528 | 264.381136 | 264.3715264 | 264.1144192 | 261.1308824 |
| 264.395232 | 264.3938688 | 264.3830528 | 264.383136 | 264.3735264 | 264.1164192 | 261.1328824 |
| 264.395232 | 264.3958688 | 264.3820528 | 264.383136 | 264.3735264 | 264.1144192 | 261.1298824 |
| 264.397232 | 264.3978688 | 264.3820528 | 264.386136 | 264.3755264 | 264.1164192 | 261.1318824 |
| 264.399232 | 264.3988688 | 264.3840528 | 264.386136 | 264.3775264 | 264.1184192 | 261.1298824 |
| 264.399232 | 264.3988688 | 264.3820528 | 264.386136 | 264.3795264 | 264.1224192 | 261.1298824 |

|            |             |             |            |             |             |             |
|------------|-------------|-------------|------------|-------------|-------------|-------------|
| 264.401232 | 264.4008688 | 264.3820528 | 264.388136 | 264.3795264 | 264.1244192 | 261.1318824 |
| 264.402232 | 264.4008688 | 264.3810528 | 264.388136 | 264.3805264 | 264.1264192 | 261.1278824 |
| 264.404232 | 264.4028688 | 264.3810528 | 264.392136 | 264.3825264 | 264.1214192 | 261.1278824 |
| 264.406232 | 264.4038688 | 264.3830528 | 264.397136 | 264.3875264 | 264.1274192 | 261.1308824 |
| 264.408232 | 264.4048688 | 264.3820528 | 264.395136 | 264.3875264 | 264.1314192 | 261.1298824 |
| 264.410232 | 264.4058688 | 264.3820528 | 264.399136 | 264.3905264 | 264.1314192 | 261.1298824 |
| 264.410232 | 264.4078688 | 264.3830528 | 264.400136 | 264.3925264 | 264.1324192 | 261.1308824 |
| 264.412232 | 264.4088688 | 264.3820528 | 264.402136 | 264.3905264 | 264.1364192 | 261.1298824 |
| 264.414232 | 264.4108688 | 264.3830528 | 264.402136 | 264.3945264 | 264.1384192 | 261.1328824 |
| 264.415232 | 264.4118688 | 264.3830528 | 264.403136 | 264.3965264 | 264.1414192 | 261.1328824 |
| 264.414232 | 264.4108688 | 264.3820528 | 264.402136 | 264.3945264 | 264.1384192 | 261.1308824 |
| 264.416232 | 264.4138688 | 264.3810528 | 264.404136 | 264.3985264 | 264.1394192 | 261.1298824 |
| 264.416232 | 264.4158688 | 264.3820528 | 264.407136 | 264.3985264 | 264.1394192 | 261.1318824 |
| 264.419232 | 264.4168688 | 264.3840528 | 264.408136 | 264.3995264 | 264.1424192 | 261.1348824 |
| 264.418232 | 264.4158688 | 264.3840528 | 264.407136 | 264.3985264 | 264.1444192 | 261.1348824 |
| 264.415232 | 264.4148688 | 264.3830528 | 264.406136 | 264.3975264 | 264.1394192 | 261.1318824 |
| 264.417232 | 264.4148688 | 264.3810528 | 264.406136 | 264.3985264 | 264.1434192 | 261.1338824 |
| 264.419232 | 264.4178688 | 264.3830528 | 264.409136 | 264.4025264 | 264.1414192 | 261.1348824 |
| 264.421232 | 264.4178688 | 264.3830528 | 264.409136 | 264.4025264 | 264.1434192 | 261.1348824 |
| 264.422232 | 264.4188688 | 264.3840528 | 264.411136 | 264.4035264 | 264.1444192 | 261.1378824 |
| 264.419232 | 264.4178688 | 264.3830528 | 264.409136 | 264.4005264 | 264.1454192 | 261.1388824 |
| 264.416232 | 264.4148688 | 264.3820528 | 264.406136 | 264.4025264 | 264.1434192 | 261.1368824 |
| 264.419232 | 264.4178688 | 264.3850528 | 264.407136 | 264.4005264 | 264.1454192 | 261.1398824 |
| 264.417232 | 264.4158688 | 264.3820528 | 264.406136 | 264.4015264 | 264.1424192 | 261.1408824 |
| 264.420232 | 264.4188688 | 264.3860528 | 264.410136 | 264.4035264 | 264.1424192 | 261.1448824 |
| 264.417232 | 264.4158688 | 264.3830528 | 264.406136 | 264.4005264 | 264.1414192 | 261.1428824 |
| 264.415232 | 264.4148688 | 264.3830528 | 264.406136 | 264.4005264 | 264.1434192 | 261.1448824 |
| 264.417232 | 264.4158688 | 264.3830528 | 264.407136 | 264.4005264 | 264.1414192 | 261.1468824 |
| 264.414232 | 264.4128688 | 264.3820528 | 264.403136 | 264.3975264 | 264.1384192 | 261.1418824 |
| 264.414232 | 264.4148688 | 264.3830528 | 264.406136 | 264.3995264 | 264.1384192 | 261.1468824 |
| 264.415232 | 264.4138688 | 264.3810528 | 264.403136 | 264.3975264 | 264.1374192 | 261.1458824 |
| 264.413232 | 264.4118688 | 264.3820528 | 264.402136 | 264.3975264 | 264.1354192 | 261.1468824 |
| 264.410232 | 264.4108688 | 264.3810528 | 264.400136 | 264.3965264 | 264.1364192 | 261.1458824 |
| 264.413232 | 264.4108688 | 264.3810528 | 264.402136 | 264.3965264 | 264.1344192 | 261.1478824 |
| 264.413232 | 264.4098688 | 264.3820528 | 264.402136 | 264.3965264 | 264.1374192 | 261.1488824 |
| 264.411232 | 264.4088688 | 264.3810528 | 264.402136 | 264.3945264 | 264.1374192 | 261.1508824 |
| 264.411232 | 264.4118688 | 264.3840528 | 264.400136 | 264.3945264 | 264.1334192 | 261.1518824 |
| 264.413232 | 264.4098688 | 264.3820528 | 264.398136 | 264.3945264 | 264.1354192 | 261.1508824 |
| 264.410232 | 264.4088688 | 264.3810528 | 264.399136 | 264.3935264 | 264.1324192 | 261.1508824 |
| 264.410232 | 264.4088688 | 264.3810528 | 264.399136 | 264.3935264 | 264.1344192 | 261.1508824 |
| 264.411232 | 264.4098688 | 264.3820528 | 264.398136 | 264.3925264 | 264.1334192 | 261.1518824 |
| 264.409232 | 264.4078688 | 264.3820528 | 264.398136 | 264.3945264 | 264.1314192 | 261.1518824 |
| 264.407232 | 264.4068688 | 264.3810528 | 264.396136 | 264.3895264 | 264.1334192 | 261.1498824 |
| 264.407232 | 264.4078688 | 264.3820528 | 264.396136 | 264.3925264 | 264.1304192 | 261.1528824 |
| 264.409232 | 264.4068688 | 264.3820528 | 264.396136 | 264.3925264 | 264.1324192 | 261.1518824 |
| 264.408232 | 264.4068688 | 264.3790528 | 264.396136 | 264.3905264 | 264.1284192 | 261.1528824 |
| 264.408232 | 264.4078688 | 264.3810528 | 264.395136 | 264.3915264 | 264.1274192 | 261.1498824 |

|            |             |             |            |             |             |             |
|------------|-------------|-------------|------------|-------------|-------------|-------------|
| 264.408232 | 264.4078688 | 264.3810528 | 264.395136 | 264.3895264 | 264.1304192 | 261.1518824 |
| 264.410232 | 264.4078688 | 264.3830528 | 264.398136 | 264.3915264 | 264.1304192 | 261.1538824 |
| 264.408232 | 264.4048688 | 264.3810528 | 264.395136 | 264.3895264 | 264.1314192 | 261.1518824 |
| 264.407232 | 264.4088688 | 264.3810528 | 264.397136 | 264.3895264 | 264.1274192 | 261.1518824 |
| 264.407232 | 264.4068688 | 264.3820528 | 264.395136 | 264.3915264 | 264.1284192 | 261.1518824 |
| 264.404232 | 264.4058688 | 264.3810528 | 264.394136 | 264.3875264 | 264.1274192 | 261.1498824 |
| 264.409232 | 264.4068688 | 264.3820528 | 264.396136 | 264.3905264 | 264.1304192 | 261.1528824 |
| 264.408232 | 264.4078688 | 264.3810528 | 264.394136 | 264.3885264 | 264.1284192 | 261.1498824 |
| 264.408232 | 264.4078688 | 264.3830528 | 264.396136 | 264.3915264 | 264.1294192 | 261.1528824 |
| 264.408232 | 264.4078688 | 264.3820528 | 264.395136 | 264.3885264 | 264.1284192 | 261.1498824 |
| 264.406232 | 264.4048688 | 264.3810528 | 264.394136 | 264.3885264 | 264.1274192 | 261.1488824 |
| 264.408232 | 264.4068688 | 264.3810528 | 264.395136 | 264.3885264 | 264.1274192 | 261.1518824 |
| 264.407232 | 264.4058688 | 264.3800528 | 264.393136 | 264.3865264 | 264.1244192 | 261.1498824 |
| 264.407232 | 264.4038688 | 264.3810528 | 264.393136 | 264.3875264 | 264.1264192 | 261.1498824 |
| 264.405232 | 264.4068688 | 264.3780528 | 264.393136 | 264.3885264 | 264.1244192 | 261.1478824 |
| 264.405232 | 264.4058688 | 264.3800528 | 264.393136 | 264.3885264 | 264.1244192 | 261.1498824 |
| 264.407232 | 264.4058688 | 264.3800528 | 264.393136 | 264.3885264 | 264.1284192 | 261.1498824 |
| 264.405232 | 264.4038688 | 264.3800528 | 264.393136 | 264.3865264 | 264.1274192 | 261.1498824 |
| 264.405232 | 264.4058688 | 264.3800528 | 264.395136 | 264.3865264 | 264.1274192 | 261.1478824 |
| 264.406232 | 264.4078688 | 264.3830528 | 264.393136 | 264.3885264 | 264.1274192 | 261.1498824 |
| 264.407232 | 264.4058688 | 264.3830528 | 264.394136 | 264.3895264 | 264.1264192 | 261.1488824 |
| 264.407232 | 264.4078688 | 264.3850528 | 264.395136 | 264.3905264 | 264.1284192 | 261.1508824 |
| 264.406232 | 264.4048688 | 264.3810528 | 264.393136 | 264.3885264 | 264.1254192 | 261.1478824 |
| 264.403232 | 264.4038688 | 264.3810528 | 264.393136 | 264.3895264 | 264.1264192 | 261.1478824 |
| 264.404232 | 264.4038688 | 264.3800528 | 264.392136 | 264.3865264 | 264.1254192 | 261.1468824 |
| 264.405232 | 264.4058688 | 264.3820528 | 264.392136 | 264.3875264 | 264.1254192 | 261.1488824 |
| 264.404232 | 264.4078688 | 264.3840528 | 264.394136 | 264.3885264 | 264.1254192 | 261.1468824 |
| 264.403232 | 264.4028688 | 264.3810528 | 264.391136 | 264.3855264 | 264.1224192 | 261.1458824 |
| 264.404232 | 264.4048688 | 264.3830528 | 264.393136 | 264.3875264 | 264.1254192 | 261.1458824 |
| 264.404232 | 264.4078688 | 264.3850528 | 264.391136 | 264.3875264 | 264.1254192 | 261.1478824 |
| 264.405232 | 264.4068688 | 264.3830528 | 264.391136 | 264.3875264 | 264.1264192 | 261.1498824 |
| 264.406232 | 264.4068688 | 264.3840528 | 264.391136 | 264.3875264 | 264.1274192 | 261.1468824 |
| 264.404232 | 264.4068688 | 264.3840528 | 264.391136 | 264.3875264 | 264.1234192 | 261.1468824 |
| 264.403232 | 264.4058688 | 264.3840528 | 264.390136 | 264.3845264 | 264.1244192 | 261.1468824 |
| 264.403232 | 264.4068688 | 264.3830528 | 264.390136 | 264.3855264 | 264.1244192 | 261.1458824 |
| 264.402232 | 264.4038688 | 264.3810528 | 264.389136 | 264.3835264 | 264.1254192 | 261.1458824 |
| 264.402232 | 264.4058688 | 264.3820528 | 264.389136 | 264.3845264 | 264.1234192 | 261.1458824 |
| 264.401232 | 264.4058688 | 264.3820528 | 264.389136 | 264.3865264 | 264.1244192 | 261.1448824 |
| 264.403232 | 264.4058688 | 264.3840528 | 264.391136 | 264.3845264 | 264.1244192 | 261.1478824 |
| 264.400232 | 264.4048688 | 264.3850528 | 264.386136 | 264.3835264 | 264.1214192 | 261.1448824 |
| 264.402232 | 264.4048688 | 264.3830528 | 264.388136 | 264.3835264 | 264.1234192 | 261.1468824 |
| 264.402232 | 264.4048688 | 264.3830528 | 264.388136 | 264.3815264 | 264.1234192 | 261.1468824 |
| 264.401232 | 264.4038688 | 264.3840528 | 264.387136 | 264.3825264 | 264.1224192 | 261.1458824 |
| 264.398232 | 264.4028688 | 264.3810528 | 264.386136 | 264.3815264 | 264.1224192 | 261.1438824 |
| 264.397232 | 264.4028688 | 264.3830528 | 264.384136 | 264.3775264 | 264.1194192 | 261.1428824 |
| 264.398232 | 264.4028688 | 264.3850528 | 264.386136 | 264.3775264 | 264.1194192 | 261.1448824 |
| 264.397232 | 264.3998688 | 264.3830528 | 264.383136 | 264.3785264 | 264.1184192 | 261.1428824 |



|            |             |             |            |             |             |             |
|------------|-------------|-------------|------------|-------------|-------------|-------------|
| 264.397232 | 264.4008688 | 264.3850528 | 264.383136 | 264.3785264 | 264.1204192 | 261.1448824 |
| 264.397232 | 264.3998688 | 264.3840528 | 264.385136 | 264.3785264 | 264.1204192 | 261.1428824 |
| 264.396232 | 264.3998688 | 264.3820528 | 264.385136 | 264.3775264 | 264.1174192 | 261.1438824 |
| 264.394232 | 264.3988688 | 264.3820528 | 264.382136 | 264.3775264 | 264.1174192 | 261.1448824 |
| 264.391232 | 264.3958688 | 264.3810528 | 264.379136 | 264.3725264 | 264.1144192 | 261.1408824 |
| 264.391232 | 264.3958688 | 264.3830528 | 264.381136 | 264.3745264 | 264.1144192 | 261.1438824 |
| 264.390232 | 264.3958688 | 264.3820528 | 264.378136 | 264.3715264 | 264.1134192 | 261.1428824 |
| 264.390232 | 264.3958688 | 264.3830528 | 264.379136 | 264.3725264 | 264.1144192 | 261.1428824 |
| 264.390232 | 264.3958688 | 264.3820528 | 264.379136 | 264.3725264 | 264.1134192 | 261.1428824 |
| 264.390232 | 264.3938688 | 264.3820528 | 264.378136 | 264.3695264 | 264.1144192 | 261.1428824 |
| 264.387232 | 264.3918688 | 264.3810528 | 264.377136 | 264.3685264 | 264.1124192 | 261.1418824 |
| 264.387232 | 264.3928688 | 264.3810528 | 264.375136 | 264.3685264 | 264.1104192 | 261.1418824 |
| 264.388232 | 264.3928688 | 264.3810528 | 264.375136 | 264.3705264 | 264.1124192 | 261.1418824 |
| 264.387232 | 264.3928688 | 264.3820528 | 264.378136 | 264.3695264 | 264.1114192 | 261.1428824 |
| 264.387232 | 264.3918688 | 264.3810528 | 264.375136 | 264.3665264 | 264.1124192 | 261.1418824 |
| 264.384232 | 264.3898688 | 264.3810528 | 264.373136 | 264.3655264 | 264.1084192 | 261.1398824 |
| 264.387232 | 264.3898688 | 264.3830528 | 264.373136 | 264.3655264 | 264.1104192 | 261.1398824 |
| 264.386232 | 264.3898688 | 264.3790528 | 264.372136 | 264.3655264 | 264.1084192 | 261.1388824 |
| 264.386232 | 264.3898688 | 264.3790528 | 264.372136 | 264.3635264 | 264.1074192 | 261.1388824 |
| 264.386232 | 264.3898688 | 264.3810528 | 264.372136 | 264.3655264 | 264.1094192 | 261.1388824 |
| 264.387232 | 264.3908688 | 264.3820528 | 264.374136 | 264.3675264 | 264.1084192 | 261.1368824 |
| 264.384232 | 264.3888688 | 264.3790528 | 264.371136 | 264.3635264 | 264.1074192 | 261.1378824 |
| 264.381232 | 264.3878688 | 264.3780528 | 264.372136 | 264.3605264 | 264.1044192 | 261.1348824 |
| 264.383232 | 264.3878688 | 264.3780528 | 264.372136 | 264.3625264 | 264.1044192 | 261.1368824 |
| 264.385232 | 264.3898688 | 264.3800528 | 264.372136 | 264.3625264 | 264.1054192 | 261.1368824 |
| 264.385232 | 264.3878688 | 264.3800528 | 264.372136 | 264.3615264 | 264.1054192 | 261.1368824 |
| 264.382232 | 264.3868688 | 264.3790528 | 264.370136 | 264.3625264 | 264.1054192 | 261.1358824 |
| 264.382232 | 264.3848688 | 264.3770528 | 264.369136 | 264.3595264 | 264.1034192 | 261.1338824 |
| 264.382232 | 264.3868688 | 264.3770528 | 264.369136 | 264.3595264 | 264.1034192 | 261.1358824 |
| 264.382232 | 264.3848688 | 264.3770528 | 264.369136 | 264.3615264 | 264.1054192 | 261.1338824 |
| 264.384232 | 264.3868688 | 264.3790528 | 264.370136 | 264.3625264 | 264.1034192 | 261.1338824 |
| 264.381232 | 264.3858688 | 264.3780528 | 264.369136 | 264.3595264 | 264.1024192 | 261.1308824 |
| 264.382232 | 264.3888688 | 264.3810528 | 264.371136 | 264.3625264 | 264.1054192 | 261.1338824 |
| 264.379232 | 264.3858688 | 264.3760528 | 264.369136 | 264.3595264 | 264.1024192 | 261.1278824 |
| 264.382232 | 264.3838688 | 264.3770528 | 264.368136 | 264.3605264 | 264.0994192 | 261.1278824 |
| 264.380232 | 264.3848688 | 264.3750528 | 264.367136 | 264.3605264 | 264.0994192 | 261.1278824 |
| 264.380232 | 264.3848688 | 264.3770528 | 264.370136 | 264.3605264 | 264.0994192 | 261.1298824 |
| 264.384232 | 264.3878688 | 264.3800528 | 264.373136 | 264.3625264 | 264.1014192 | 261.1318824 |
| 264.383232 | 264.3848688 | 264.3780528 | 264.371136 | 264.3615264 | 264.1004192 | 261.1308824 |
| 264.379232 | 264.3818688 | 264.3760528 | 264.368136 | 264.3575264 | 264.1004192 | 261.1278824 |
| 264.379232 | 264.3838688 | 264.3780528 | 264.368136 | 264.3595264 | 264.1024192 | 261.1278824 |
| 264.383232 | 264.3858688 | 264.3790528 | 264.371136 | 264.3615264 | 264.1044192 | 261.1278824 |
| 264.382232 | 264.3858688 | 264.3780528 | 264.370136 | 264.3595264 | 264.1054192 | 261.1288824 |
| 264.382232 | 264.3858688 | 264.3770528 | 264.372136 | 264.3615264 | 264.1034192 | 261.1268824 |
| 264.385232 | 264.3878688 | 264.3790528 | 264.374136 | 264.3655264 | 264.1054192 | 261.1278824 |
| 264.387232 | 264.3878688 | 264.3760528 | 264.374136 | 264.3685264 | 264.1064192 | 261.1278824 |
| 264.386232 | 264.3868688 | 264.3770528 | 264.373136 | 264.3645264 | 264.1074192 | 261.1268824 |

|            |             |             |            |             |             |             |
|------------|-------------|-------------|------------|-------------|-------------|-------------|
| 264.388232 | 264.3888688 | 264.3750528 | 264.375136 | 264.3665264 | 264.1114192 | 261.1268824 |
| 264.390232 | 264.3898688 | 264.3770528 | 264.376136 | 264.3685264 | 264.1124192 | 261.1268824 |
| 264.390232 | 264.3898688 | 264.3760528 | 264.378136 | 264.3705264 | 264.1134192 | 261.1248824 |
| 264.392232 | 264.3918688 | 264.3760528 | 264.380136 | 264.3725264 | 264.1154192 | 261.1238824 |
| 264.395232 | 264.3948688 | 264.3790528 | 264.383136 | 264.3755264 | 264.1184192 | 261.1268824 |
| 264.396232 | 264.3948688 | 264.3760528 | 264.383136 | 264.3765264 | 264.1174192 | 261.1218824 |
| 264.397232 | 264.3968688 | 264.3770528 | 264.388136 | 264.3795264 | 264.1224192 | 261.1248824 |
| 264.401232 | 264.3998688 | 264.3770528 | 264.388136 | 264.3805264 | 264.1224192 | 261.1248824 |
| 264.403232 | 264.3978688 | 264.3770528 | 264.388136 | 264.3795264 | 264.1274192 | 261.1248824 |
| 264.403232 | 264.3998688 | 264.3770528 | 264.391136 | 264.3825264 | 264.1254192 | 261.1248824 |
| 264.403232 | 264.4008688 | 264.3770528 | 264.391136 | 264.3845264 | 264.1274192 | 261.1248824 |
| 264.401232 | 264.4008688 | 264.3770528 | 264.391136 | 264.3845264 | 264.1274192 | 261.1218824 |
| 264.404232 | 264.4038688 | 264.3790528 | 264.396136 | 264.3895264 | 264.1294192 | 261.1218824 |
| 264.409232 | 264.4078688 | 264.3790528 | 264.397136 | 264.3905264 | 264.1344192 | 261.1228824 |
| 264.408232 | 264.4078688 | 264.3790528 | 264.397136 | 264.3905264 | 264.1354192 | 261.1248824 |
| 264.412232 | 264.4088688 | 264.3800528 | 264.400136 | 264.3935264 | 264.1384192 | 261.1278824 |
| 264.408232 | 264.4088688 | 264.3780528 | 264.398136 | 264.3935264 | 264.1384192 | 261.1238824 |
| 264.412232 | 264.4098688 | 264.3790528 | 264.400136 | 264.3945264 | 264.1404192 | 261.1278824 |
| 264.413232 | 264.4108688 | 264.3810528 | 264.402136 | 264.3975264 | 264.1394192 | 261.1288824 |
| 264.413232 | 264.4098688 | 264.3790528 | 264.402136 | 264.3975264 | 264.1394192 | 261.1268824 |
| 264.413232 | 264.4128688 | 264.3800528 | 264.404136 | 264.3955264 | 264.1394192 | 261.1268824 |
| 264.417232 | 264.4138688 | 264.3810528 | 264.405136 | 264.4005264 | 264.1394192 | 261.1298824 |
| 264.416232 | 264.4138688 | 264.3840528 | 264.404136 | 264.3995264 | 264.1404192 | 261.1308824 |
| 264.416232 | 264.4148688 | 264.3830528 | 264.404136 | 264.4005264 | 264.1444192 | 261.1338824 |
| 264.415232 | 264.4128688 | 264.3830528 | 264.406136 | 264.3985264 | 264.1414192 | 261.1338824 |
| 264.415232 | 264.4148688 | 264.3810528 | 264.404136 | 264.4005264 | 264.1414192 | 261.1328824 |
| 264.415232 | 264.4148688 | 264.3790528 | 264.402136 | 264.3955264 | 264.1414192 | 261.1328824 |
| 264.416232 | 264.4158688 | 264.3820528 | 264.405136 | 264.4015264 | 264.1414192 | 261.1358824 |
| 264.413232 | 264.4118688 | 264.3790528 | 264.401136 | 264.3975264 | 264.1384192 | 261.1338824 |
| 264.413232 | 264.4128688 | 264.3800528 | 264.402136 | 264.3965264 | 264.1394192 | 261.1358824 |
| 264.413232 | 264.4128688 | 264.3790528 | 264.400136 | 264.3965264 | 264.1414192 | 261.1398824 |
| 264.413232 | 264.4108688 | 264.3800528 | 264.400136 | 264.3965264 | 264.1394192 | 261.1398824 |
| 264.411232 | 264.4128688 | 264.3790528 | 264.402136 | 264.3965264 | 264.1394192 | 261.1398824 |
| 264.411232 | 264.4108688 | 264.3790528 | 264.400136 | 264.3965264 | 264.1394192 | 261.1398824 |
| 264.409232 | 264.4108688 | 264.3780528 | 264.398136 | 264.3965264 | 264.1374192 | 261.1408824 |
| 264.410232 | 264.4118688 | 264.3810528 | 264.403136 | 264.3975264 | 264.1384192 | 261.1448824 |
| 264.413232 | 264.4138688 | 264.3780528 | 264.401136 | 264.3975264 | 264.1344192 | 261.1448824 |
| 264.411232 | 264.4088688 | 264.3790528 | 264.400136 | 264.3955264 | 264.1344192 | 261.1438824 |
| 264.409232 | 264.4108688 | 264.3790528 | 264.399136 | 264.3955264 | 264.1354192 | 261.1448824 |
| 264.409232 | 264.4098688 | 264.3800528 | 264.399136 | 264.3945264 | 264.1354192 | 261.1468824 |
| 264.409232 | 264.4088688 | 264.3770528 | 264.398136 | 264.3935264 | 264.1354192 | 261.1448824 |
| 264.407232 | 264.4088688 | 264.3770528 | 264.396136 | 264.3915264 | 264.1334192 | 261.1448824 |
| 264.407232 | 264.4098688 | 264.3760528 | 264.396136 | 264.3895264 | 264.1334192 | 261.1458824 |
| 264.407232 | 264.4058688 | 264.3750528 | 264.394136 | 264.3895264 | 264.1314192 | 261.1428824 |
| 264.408232 | 264.4078688 | 264.3780528 | 264.397136 | 264.3905264 | 264.1344192 | 261.1458824 |
| 264.408232 | 264.4068688 | 264.3780528 | 264.395136 | 264.3925264 | 264.1344192 | 261.1458824 |
| 264.406232 | 264.4068688 | 264.3760528 | 264.395136 | 264.3885264 | 264.1304192 | 261.1478824 |

|            |             |             |            |             |             |             |
|------------|-------------|-------------|------------|-------------|-------------|-------------|
| 264.407232 | 264.4078688 | 264.3790528 | 264.397136 | 264.3915264 | 264.1304192 | 261.1488824 |
| 264.405232 | 264.4078688 | 264.3790528 | 264.397136 | 264.3915264 | 264.1324192 | 261.1488824 |
| 264.410232 | 264.4098688 | 264.3820528 | 264.396136 | 264.3915264 | 264.1314192 | 261.1498824 |
| 264.408232 | 264.4088688 | 264.3780528 | 264.396136 | 264.3915264 | 264.1314192 | 261.1498824 |
| 264.405232 | 264.4078688 | 264.3780528 | 264.393136 | 264.3915264 | 264.1314192 | 261.1488824 |
| 264.405232 | 264.4078688 | 264.3770528 | 264.395136 | 264.3885264 | 264.1284192 | 261.1458824 |
| 264.406232 | 264.4078688 | 264.3760528 | 264.395136 | 264.3885264 | 264.1284192 | 261.1488824 |
| 264.406232 | 264.4068688 | 264.3790528 | 264.392136 | 264.3885264 | 264.1284192 | 261.1488824 |
| 264.406232 | 264.4088688 | 264.3800528 | 264.396136 | 264.3895264 | 264.1304192 | 261.1488824 |
| 264.405232 | 264.4058688 | 264.3790528 | 264.393136 | 264.3875264 | 264.1264192 | 261.1468824 |
| 264.407232 | 264.4068688 | 264.3800528 | 264.393136 | 264.3875264 | 264.1244192 | 261.1478824 |
| 264.404232 | 264.4058688 | 264.3790528 | 264.393136 | 264.3865264 | 264.1264192 | 261.1468824 |
| 264.405232 | 264.4078688 | 264.3810528 | 264.393136 | 264.3885264 | 264.1244192 | 261.1478824 |
| 264.405232 | 264.4088688 | 264.3810528 | 264.393136 | 264.3885264 | 264.1234192 | 261.1498824 |
| 264.406232 | 264.4058688 | 264.3790528 | 264.395136 | 264.3905264 | 264.1254192 | 261.1468824 |
| 264.407232 | 264.4088688 | 264.3810528 | 264.395136 | 264.3905264 | 264.1264192 | 261.1478824 |
| 264.409232 | 264.4088688 | 264.3820528 | 264.396136 | 264.3915264 | 264.1304192 | 261.1498824 |
| 264.408232 | 264.4088688 | 264.3790528 | 264.395136 | 264.3905264 | 264.1274192 | 261.1488824 |
| 264.410232 | 264.4088688 | 264.3800528 | 264.397136 | 264.3915264 | 264.1254192 | 261.1468824 |
| 264.410232 | 264.4098688 | 264.3800528 | 264.397136 | 264.3925264 | 264.1284192 | 261.1478824 |
| 264.410232 | 264.4108688 | 264.3820528 | 264.397136 | 264.3925264 | 264.1294192 | 261.1458824 |
| 264.411232 | 264.4098688 | 264.3800528 | 264.397136 | 264.3905264 | 264.1284192 | 261.1458824 |
| 264.409232 | 264.4108688 | 264.3810528 | 264.399136 | 264.3925264 | 264.1304192 | 261.1458824 |
| 264.412232 | 264.4128688 | 264.3820528 | 264.400136 | 264.3965264 | 264.1334192 | 261.1488824 |
| 264.414232 | 264.4138688 | 264.3840528 | 264.404136 | 264.3975264 | 264.1354192 | 261.1488824 |
| 264.415232 | 264.4148688 | 264.3820528 | 264.402136 | 264.3965264 | 264.1344192 | 261.1478824 |
| 264.415232 | 264.4148688 | 264.3840528 | 264.402136 | 264.3945264 | 264.1354192 | 261.1458824 |
| 264.416232 | 264.4148688 | 264.3820528 | 264.402136 | 264.3965264 | 264.1354192 | 261.1498824 |
| 264.416232 | 264.4158688 | 264.3870528 | 264.405136 | 264.3965264 | 264.1374192 | 261.1488824 |
| 264.416232 | 264.4178688 | 264.3870528 | 264.404136 | 264.3995264 | 264.1354192 | 261.1488824 |
| 264.416232 | 264.4188688 | 264.3870528 | 264.407136 | 264.3995264 | 264.1384192 | 261.1488824 |
| 264.414232 | 264.4178688 | 264.3860528 | 264.402136 | 264.3965264 | 264.1354192 | 261.1478824 |
| 264.414232 | 264.4158688 | 264.3840528 | 264.402136 | 264.3975264 | 264.1374192 | 261.1458824 |
| 264.416232 | 264.4158688 | 264.3860528 | 264.404136 | 264.3975264 | 264.1354192 | 261.1458824 |
| 264.418232 | 264.4178688 | 264.3910528 | 264.405136 | 264.3995264 | 264.1384192 | 261.1458824 |
| 264.416232 | 264.4188688 | 264.3890528 | 264.405136 | 264.3995264 | 264.1364192 | 261.1488824 |
| 264.419232 | 264.4188688 | 264.3880528 | 264.405136 | 264.3985264 | 264.1384192 | 261.1508824 |
| 264.415232 | 264.4168688 | 264.3880528 | 264.403136 | 264.3975264 | 264.1364192 | 261.1508824 |
| 264.417232 | 264.4188688 | 264.3900528 | 264.403136 | 264.3965264 | 264.1364192 | 261.1498824 |
| 264.414232 | 264.4168688 | 264.3880528 | 264.401136 | 264.3965264 | 264.1354192 | 261.1518824 |
| 264.414232 | 264.4148688 | 264.3890528 | 264.399136 | 264.3935264 | 264.1334192 | 261.1498824 |
| 264.411232 | 264.4148688 | 264.3890528 | 264.398136 | 264.3915264 | 264.1354192 | 261.1498824 |
| 264.414232 | 264.4168688 | 264.3900528 | 264.399136 | 264.3925264 | 264.1334192 | 261.1528824 |
| 264.412232 | 264.4128688 | 264.3900528 | 264.399136 | 264.3925264 | 264.1314192 | 261.1528824 |
| 264.410232 | 264.4148688 | 264.3900528 | 264.396136 | 264.3895264 | 264.1314192 | 261.1528824 |
| 264.405232 | 264.4088688 | 264.3910528 | 264.393136 | 264.3885264 | 264.1284192 | 261.1518824 |
| 264.405232 | 264.4108688 | 264.3890528 | 264.390136 | 264.3865264 | 264.1284192 | 261.1518824 |

|            |             |             |            |             |             |             |
|------------|-------------|-------------|------------|-------------|-------------|-------------|
| 264.405232 | 264.4088688 | 264.3890528 | 264.391136 | 264.3855264 | 264.1284192 | 261.1528824 |
| 264.405232 | 264.4068688 | 264.3890528 | 264.388136 | 264.3825264 | 264.1244192 | 261.1508824 |
| 264.403232 | 264.4088688 | 264.3900528 | 264.391136 | 264.3835264 | 264.1254192 | 261.1508824 |
| 264.402232 | 264.4068688 | 264.3880528 | 264.387136 | 264.3815264 | 264.1254192 | 261.1508824 |
| 264.401232 | 264.4038688 | 264.3870528 | 264.388136 | 264.3825264 | 264.1244192 | 261.1528824 |
| 264.402232 | 264.4048688 | 264.3900528 | 264.389136 | 264.3815264 | 264.1214192 | 261.1538824 |
| 264.400232 | 264.4038688 | 264.3880528 | 264.386136 | 264.3795264 | 264.1194192 | 261.1538824 |
| 264.402232 | 264.4048688 | 264.3910528 | 264.387136 | 264.3815264 | 264.1214192 | 261.1538824 |
| 264.397232 | 264.3988688 | 264.3850528 | 264.381136 | 264.3775264 | 264.1174192 | 261.1508824 |
| 264.393232 | 264.4008688 | 264.3870528 | 264.379136 | 264.3755264 | 264.1144192 | 261.1508824 |
| 264.392232 | 264.3978688 | 264.3870528 | 264.381136 | 264.3735264 | 264.1144192 | 261.1488824 |
| 264.393232 | 264.3968688 | 264.3860528 | 264.381136 | 264.3735264 | 264.1144192 | 261.1508824 |
| 264.393232 | 264.3968688 | 264.3860528 | 264.379136 | 264.3715264 | 264.1124192 | 261.1508824 |
| 264.393232 | 264.3988688 | 264.3860528 | 264.379136 | 264.3725264 | 264.1104192 | 261.1518824 |
| 264.392232 | 264.3968688 | 264.3870528 | 264.377136 | 264.3705264 | 264.1114192 | 261.1498824 |
| 264.388232 | 264.3968688 | 264.3850528 | 264.375136 | 264.3705264 | 264.1114192 | 261.1498824 |
| 264.391232 | 264.3948688 | 264.3860528 | 264.377136 | 264.3715264 | 264.1094192 | 261.1518824 |
| 264.388232 | 264.3938688 | 264.3870528 | 264.375136 | 264.3665264 | 264.1094192 | 261.1478824 |
| 264.390232 | 264.3948688 | 264.3860528 | 264.375136 | 264.3685264 | 264.1094192 | 261.1498824 |
| 264.388232 | 264.3918688 | 264.3860528 | 264.373136 | 264.3665264 | 264.1094192 | 261.1478824 |
| 264.388232 | 264.3918688 | 264.3850528 | 264.372136 | 264.3665264 | 264.1074192 | 261.1478824 |
| 264.388232 | 264.3918688 | 264.3850528 | 264.372136 | 264.3645264 | 264.1054192 | 261.1468824 |
| 264.386232 | 264.3898688 | 264.3830528 | 264.371136 | 264.3645264 | 264.1034192 | 261.1448824 |
| 264.384232 | 264.3888688 | 264.3830528 | 264.370136 | 264.3635264 | 264.1054192 | 261.1448824 |
| 264.385232 | 264.3898688 | 264.3820528 | 264.369136 | 264.3645264 | 264.1044192 | 261.1438824 |
| 264.383232 | 264.3898688 | 264.3820528 | 264.371136 | 264.3625264 | 264.1064192 | 261.1408824 |
| 264.383232 | 264.3878688 | 264.3820528 | 264.368136 | 264.3605264 | 264.1024192 | 261.1398824 |
| 264.386232 | 264.3888688 | 264.3810528 | 264.371136 | 264.3635264 | 264.1034192 | 261.1418824 |
| 264.384232 | 264.3878688 | 264.3810528 | 264.369136 | 264.3615264 | 264.1054192 | 261.1388824 |
| 264.382232 | 264.3878688 | 264.3800528 | 264.369136 | 264.3615264 | 264.1014192 | 261.1378824 |
| 264.384232 | 264.3868688 | 264.3790528 | 264.369136 | 264.3595264 | 264.1044192 | 261.1368824 |
| 264.382232 | 264.3868688 | 264.3790528 | 264.367136 | 264.3615264 | 264.1034192 | 261.1358824 |
| 264.383232 | 264.3868688 | 264.3790528 | 264.369136 | 264.3645264 | 264.1044192 | 261.1388824 |
| 264.381232 | 264.3868688 | 264.3790528 | 264.369136 | 264.3615264 | 264.1024192 | 261.1368824 |
| 264.382232 | 264.3858688 | 264.3770528 | 264.367136 | 264.3595264 | 264.1034192 | 261.1358824 |
| 264.382232 | 264.3858688 | 264.3770528 | 264.367136 | 264.3615264 | 264.1034192 | 261.1338824 |
| 264.380232 | 264.3848688 | 264.3760528 | 264.367136 | 264.3615264 | 264.1014192 | 261.1328824 |
| 264.385232 | 264.3868688 | 264.3790528 | 264.372136 | 264.3665264 | 264.1044192 | 261.1338824 |
| 264.387232 | 264.3888688 | 264.3770528 | 264.372136 | 264.3645264 | 264.1064192 | 261.1308824 |
| 264.386232 | 264.3898688 | 264.3770528 | 264.373136 | 264.3645264 | 264.1074192 | 261.1298824 |
| 264.388232 | 264.3888688 | 264.3770528 | 264.373136 | 264.3665264 | 264.1074192 | 261.1298824 |
| 264.393232 | 264.3948688 | 264.3790528 | 264.381136 | 264.3725264 | 264.1144192 | 261.1318824 |
| 264.394232 | 264.3958688 | 264.3790528 | 264.382136 | 264.3735264 | 264.1154192 | 261.1328824 |
| 264.394232 | 264.3928688 | 264.3750528 | 264.381136 | 264.3725264 | 264.1134192 | 261.1258824 |
| 264.397232 | 264.3978688 | 264.3780528 | 264.384136 | 264.3775264 | 264.1194192 | 261.1288824 |
| 264.397232 | 264.3968688 | 264.3750528 | 264.385136 | 264.3775264 | 264.1244192 | 261.1268824 |
| 264.400232 | 264.3988688 | 264.3780528 | 264.389136 | 264.3785264 | 264.1244192 | 261.1268824 |

|            |             |             |            |             |             |             |
|------------|-------------|-------------|------------|-------------|-------------|-------------|
| 264.401232 | 264.4018688 | 264.3770528 | 264.390136 | 264.3825264 | 264.1294192 | 261.1268824 |
| 264.404232 | 264.4048688 | 264.3800528 | 264.395136 | 264.3885264 | 264.1304192 | 261.1278824 |
| 264.407232 | 264.4078688 | 264.3800528 | 264.398136 | 264.3875264 | 264.1324192 | 261.1258824 |
| 264.410232 | 264.4068688 | 264.3780528 | 264.396136 | 264.3885264 | 264.1324192 | 261.1228824 |
| 264.412232 | 264.4108688 | 264.3820528 | 264.399136 | 264.3925264 | 264.1384192 | 261.1268824 |
| 264.412232 | 264.4088688 | 264.3800528 | 264.397136 | 264.3905264 | 264.1384192 | 261.1238824 |
| 264.411232 | 264.4118688 | 264.3800528 | 264.398136 | 264.3905264 | 264.1364192 | 261.1228824 |
| 264.413232 | 264.4098688 | 264.3810528 | 264.400136 | 264.3935264 | 264.1374192 | 261.1248824 |
| 264.414232 | 264.4118688 | 264.3810528 | 264.400136 | 264.3925264 | 264.1384192 | 261.1258824 |
| 264.415232 | 264.4138688 | 264.3840528 | 264.404136 | 264.3975264 | 264.1394192 | 261.1258824 |
| 264.412232 | 264.4118688 | 264.3830528 | 264.403136 | 264.3945264 | 264.1374192 | 261.1258824 |
| 264.414232 | 264.4128688 | 264.3810528 | 264.401136 | 264.3965264 | 264.1394192 | 261.1258824 |
| 264.414232 | 264.4118688 | 264.3810528 | 264.401136 | 264.3945264 | 264.1374192 | 261.1258824 |
| 264.412232 | 264.4128688 | 264.3820528 | 264.401136 | 264.3945264 | 264.1364192 | 261.1288824 |
| 264.414232 | 264.4118688 | 264.3850528 | 264.402136 | 264.3945264 | 264.1404192 | 261.1328824 |
| 264.412232 | 264.4118688 | 264.3810528 | 264.401136 | 264.3935264 | 264.1364192 | 261.1318824 |
| 264.412232 | 264.4128688 | 264.3830528 | 264.401136 | 264.3935264 | 264.1374192 | 261.1338824 |
| 264.412232 | 264.4118688 | 264.3830528 | 264.400136 | 264.3955264 | 264.1364192 | 261.1348824 |
| 264.411232 | 264.4128688 | 264.3840528 | 264.399136 | 264.3945264 | 264.1374192 | 261.1378824 |
| 264.411232 | 264.4108688 | 264.3820528 | 264.398136 | 264.3925264 | 264.1354192 | 261.1358824 |
| 264.413232 | 264.4118688 | 264.3840528 | 264.399136 | 264.3955264 | 264.1404192 | 261.1408824 |
| 264.412232 | 264.4098688 | 264.3840528 | 264.400136 | 264.3965264 | 264.1354192 | 261.1398824 |
| 264.411232 | 264.4118688 | 264.3850528 | 264.400136 | 264.3935264 | 264.1344192 | 261.1408824 |
| 264.411232 | 264.4098688 | 264.3800528 | 264.398136 | 264.3955264 | 264.1344192 | 261.1428824 |
| 264.411232 | 264.4118688 | 264.3830528 | 264.400136 | 264.3955264 | 264.1364192 | 261.1428824 |
| 264.409232 | 264.4108688 | 264.3830528 | 264.399136 | 264.3915264 | 264.1304192 | 261.1418824 |
| 264.411232 | 264.4108688 | 264.3840528 | 264.401136 | 264.3945264 | 264.1344192 | 261.1458824 |
| 264.409232 | 264.4098688 | 264.3830528 | 264.398136 | 264.3925264 | 264.1334192 | 261.1428824 |
| 264.407232 | 264.4098688 | 264.3820528 | 264.396136 | 264.3905264 | 264.1304192 | 261.1448824 |
| 264.408232 | 264.4108688 | 264.3820528 | 264.397136 | 264.3935264 | 264.1314192 | 261.1448824 |
| 264.407232 | 264.4108688 | 264.3830528 | 264.395136 | 264.3895264 | 264.1304192 | 261.1458824 |
| 264.407232 | 264.4078688 | 264.3790528 | 264.395136 | 264.3905264 | 264.1284192 | 261.1428824 |
| 264.408232 | 264.4098688 | 264.3850528 | 264.394136 | 264.3885264 | 264.1314192 | 261.1458824 |
| 264.407232 | 264.4068688 | 264.3810528 | 264.396136 | 264.3915264 | 264.1304192 | 261.1448824 |
| 264.405232 | 264.4048688 | 264.3770528 | 264.392136 | 264.3875264 | 264.1244192 | 261.1428824 |
| 264.405232 | 264.4088688 | 264.3790528 | 264.395136 | 264.3895264 | 264.1284192 | 261.1458824 |
| 264.405232 | 264.4058688 | 264.3790528 | 264.394136 | 264.3915264 | 264.1264192 | 261.1458824 |
| 264.402232 | 264.4048688 | 264.3800528 | 264.392136 | 264.3885264 | 264.1274192 | 261.1468824 |
| 264.406232 | 264.4068688 | 264.3800528 | 264.394136 | 264.3905264 | 264.1274192 | 261.1468824 |
| 264.404232 | 264.4048688 | 264.3800528 | 264.394136 | 264.3865264 | 264.1274192 | 261.1458824 |
| 264.405232 | 264.4068688 | 264.3780528 | 264.392136 | 264.3895264 | 264.1264192 | 261.1448824 |
| 264.403232 | 264.4028688 | 264.3780528 | 264.392136 | 264.3885264 | 264.1284192 | 261.1478824 |
| 264.402232 | 264.4048688 | 264.3790528 | 264.391136 | 264.3875264 | 264.1254192 | 261.1468824 |
| 264.404232 | 264.4058688 | 264.3780528 | 264.391136 | 264.3875264 | 264.1274192 | 261.1488824 |
| 264.400232 | 264.4028688 | 264.3780528 | 264.388136 | 264.3835264 | 264.1234192 | 261.1458824 |
| 264.401232 | 264.4038688 | 264.3780528 | 264.389136 | 264.3865264 | 264.1244192 | 261.1428824 |
| 264.399232 | 264.4028688 | 264.3760528 | 264.387136 | 264.3825264 | 264.1224192 | 261.1428824 |

|            |             |             |            |             |             |             |
|------------|-------------|-------------|------------|-------------|-------------|-------------|
| 264.400232 | 264.4018688 | 264.3770528 | 264.387136 | 264.3845264 | 264.1234192 | 261.1428824 |
| 264.402232 | 264.4028688 | 264.3790528 | 264.389136 | 264.3845264 | 264.1254192 | 261.1448824 |
| 264.400232 | 264.4028688 | 264.3770528 | 264.389136 | 264.3845264 | 264.1224192 | 261.1468824 |
| 264.400232 | 264.4028688 | 264.3760528 | 264.389136 | 264.3855264 | 264.1234192 | 261.1468824 |
| 264.401232 | 264.4028688 | 264.3780528 | 264.387136 | 264.3855264 | 264.1224192 | 261.1478824 |
| 264.401232 | 264.4018688 | 264.3790528 | 264.390136 | 264.3845264 | 264.1244192 | 261.1478824 |
| 264.403232 | 264.4048688 | 264.3780528 | 264.390136 | 264.3865264 | 264.1254192 | 261.1468824 |
| 264.397232 | 264.4008688 | 264.3770528 | 264.387136 | 264.3815264 | 264.1224192 | 261.1438824 |
| 264.400232 | 264.4018688 | 264.3770528 | 264.388136 | 264.3845264 | 264.1224192 | 261.1478824 |
| 264.397232 | 264.3988688 | 264.3760528 | 264.387136 | 264.3815264 | 264.1204192 | 261.1458824 |
| 264.400232 | 264.4018688 | 264.3790528 | 264.387136 | 264.3815264 | 264.1224192 | 261.1478824 |
| 264.399232 | 264.4018688 | 264.3770528 | 264.388136 | 264.3845264 | 264.1224192 | 261.1438824 |
| 264.399232 | 264.4008688 | 264.3770528 | 264.387136 | 264.3815264 | 264.1204192 | 261.1438824 |
| 264.401232 | 264.4048688 | 264.3780528 | 264.391136 | 264.3855264 | 264.1214192 | 261.1468824 |
| 264.403232 | 264.4048688 | 264.3800528 | 264.389136 | 264.3875264 | 264.1224192 | 261.1468824 |
| 264.403232 | 264.4028688 | 264.3780528 | 264.389136 | 264.3855264 | 264.1244192 | 261.1448824 |
| 264.404232 | 264.4048688 | 264.3790528 | 264.391136 | 264.3865264 | 264.1254192 | 261.1448824 |
| 264.403232 | 264.4058688 | 264.3800528 | 264.392136 | 264.3875264 | 264.1254192 | 261.1458824 |
| 264.404232 | 264.4068688 | 264.3790528 | 264.393136 | 264.3885264 | 264.1274192 | 261.1458824 |
| 264.408232 | 264.4068688 | 264.3770528 | 264.393136 | 264.3865264 | 264.1274192 | 261.1438824 |
| 264.407232 | 264.4068688 | 264.3790528 | 264.394136 | 264.3885264 | 264.1284192 | 261.1438824 |
| 264.408232 | 264.4078688 | 264.3800528 | 264.397136 | 264.3895264 | 264.1294192 | 261.1448824 |
| 264.406232 | 264.4078688 | 264.3780528 | 264.394136 | 264.3895264 | 264.1284192 | 261.1428824 |
| 264.408232 | 264.4088688 | 264.3790528 | 264.397136 | 264.3905264 | 264.1294192 | 261.1428824 |
| 264.410232 | 264.4108688 | 264.3800528 | 264.398136 | 264.3915264 | 264.1324192 | 261.1458824 |
| 264.409232 | 264.4088688 | 264.3790528 | 264.396136 | 264.3915264 | 264.1304192 | 261.1428824 |
| 264.411232 | 264.4128688 | 264.3850528 | 264.402136 | 264.3975264 | 264.1324192 | 261.1448824 |
| 264.413232 | 264.4128688 | 264.3830528 | 264.400136 | 264.3945264 | 264.1344192 | 261.1448824 |
| 264.415232 | 264.4148688 | 264.3830528 | 264.400136 | 264.3965264 | 264.1344192 | 261.1448824 |
| 264.415232 | 264.4128688 | 264.3860528 | 264.402136 | 264.3975264 | 264.1384192 | 261.1468824 |
| 264.411232 | 264.4148688 | 264.3850528 | 264.400136 | 264.3945264 | 264.1364192 | 261.1468824 |
| 264.412232 | 264.4148688 | 264.3830528 | 264.399136 | 264.3955264 | 264.1374192 | 261.1448824 |
| 264.411232 | 264.4148688 | 264.3840528 | 264.400136 | 264.3945264 | 264.1324192 | 261.1428824 |
| 264.413232 | 264.4138688 | 264.3870528 | 264.403136 | 264.3985264 | 264.1344192 | 261.1438824 |
| 264.416232 | 264.4168688 | 264.3860528 | 264.403136 | 264.3995264 | 264.1384192 | 261.1468824 |
| 264.417232 | 264.4168688 | 264.3860528 | 264.404136 | 264.3995264 | 264.1354192 | 261.1468824 |
| 264.414232 | 264.4148688 | 264.3860528 | 264.402136 | 264.3975264 | 264.1354192 | 261.1438824 |
| 264.416232 | 264.4158688 | 264.3870528 | 264.403136 | 264.3985264 | 264.1364192 | 261.1458824 |
| 264.415232 | 264.4158688 | 264.3860528 | 264.403136 | 264.3955264 | 264.1354192 | 261.1458824 |
| 264.416232 | 264.4148688 | 264.3880528 | 264.402136 | 264.3965264 | 264.1374192 | 261.1478824 |
| 264.413232 | 264.4168688 | 264.3850528 | 264.401136 | 264.3955264 | 264.1344192 | 261.1458824 |
| 264.414232 | 264.4178688 | 264.3880528 | 264.401136 | 264.3935264 | 264.1344192 | 261.1478824 |
| 264.411232 | 264.4128688 | 264.3870528 | 264.398136 | 264.3935264 | 264.1344192 | 261.1478824 |
| 264.412232 | 264.4158688 | 264.3880528 | 264.400136 | 264.3955264 | 264.1324192 | 261.1488824 |
| 264.411232 | 264.4148688 | 264.3880528 | 264.398136 | 264.3935264 | 264.1344192 | 261.1508824 |
| 264.410232 | 264.4128688 | 264.3890528 | 264.400136 | 264.3945264 | 264.1314192 | 261.1478824 |
| 264.406232 | 264.4098688 | 264.3870528 | 264.396136 | 264.3905264 | 264.1294192 | 261.1458824 |

|            |             |             |            |             |             |             |
|------------|-------------|-------------|------------|-------------|-------------|-------------|
| 264.408232 | 264.4118688 | 264.3870528 | 264.397136 | 264.3925264 | 264.1304192 | 261.1528824 |
| 264.408232 | 264.4128688 | 264.3890528 | 264.398136 | 264.3925264 | 264.1334192 | 261.1508824 |
| 264.412232 | 264.4138688 | 264.3900528 | 264.399136 | 264.3935264 | 264.1344192 | 261.1578824 |
| 264.412232 | 264.4138688 | 264.3890528 | 264.402136 | 264.3975264 | 264.1334192 | 261.1598824 |
| 264.409232 | 264.4118688 | 264.3900528 | 264.397136 | 264.3935264 | 264.1324192 | 261.1578824 |
| 264.411232 | 264.4118688 | 264.3890528 | 264.398136 | 264.3945264 | 264.1314192 | 261.1618824 |
| 264.410232 | 264.4128688 | 264.3910528 | 264.398136 | 264.3945264 | 264.1314192 | 261.1648824 |
| 264.411232 | 264.4128688 | 264.3890528 | 264.400136 | 264.3945264 | 264.1294192 | 261.1608824 |
| 264.427232 | 264.4218688 | 264.3880528 | 264.421136 | 264.4165264 | 264.1434192 | 261.1638824 |
| 264.454232 | 264.4418688 | 264.3890528 | 264.450136 | 264.4405264 | 264.1674192 | 261.1648824 |
| 264.476232 | 264.4558688 | 264.3940528 | 264.466136 | 264.4575264 | 264.2064192 | 261.1678824 |
| 264.488232 | 264.4628688 | 264.3950528 | 264.475136 | 264.4645264 | 264.2394192 | 261.1678824 |
| 264.491232 | 264.4698688 | 264.3970528 | 264.478136 | 264.4695264 | 264.2504192 | 261.1678824 |
| 264.491232 | 264.4738688 | 264.4010528 | 264.480136 | 264.4695264 | 264.2564192 | 261.1678824 |
| 264.491232 | 264.4748688 | 264.4030528 | 264.477136 | 264.4665264 | 264.2534192 | 261.1698824 |
| 264.490232 | 264.4758688 | 264.4050528 | 264.474136 | 264.4625264 | 264.2524192 | 261.1698824 |
| 264.484232 | 264.4738688 | 264.4070528 | 264.472136 | 264.4625264 | 264.2464192 | 261.1708824 |
| 264.479232 | 264.4698688 | 264.4080528 | 264.464136 | 264.4555264 | 264.2314192 | 261.1728824 |
| 264.474232 | 264.4688688 | 264.4090528 | 264.462136 | 264.4545264 | 264.2214192 | 261.1808824 |
| 264.469232 | 264.4658688 | 264.4090528 | 264.457136 | 264.4495264 | 264.2064192 | 261.1848824 |
| 264.466232 | 264.4638688 | 264.4110528 | 264.455136 | 264.4475264 | 264.2024192 | 261.1928824 |
| 264.464232 | 264.4638688 | 264.4110528 | 264.453136 | 264.4455264 | 264.1964192 | 261.1958824 |
| 264.463232 | 264.4588688 | 264.4110528 | 264.450136 | 264.4455264 | 264.1864192 | 261.1978824 |
| 264.461232 | 264.4598688 | 264.4140528 | 264.450136 | 264.4475264 | 264.1794192 | 261.2008824 |
| 264.465232 | 264.4608688 | 264.4160528 | 264.454136 | 264.4485264 | 264.1764192 | 261.2028824 |
| 264.468232 | 264.4628688 | 264.4130528 | 264.456136 | 264.4505264 | 264.1754192 | 261.2048824 |
| 264.469232 | 264.4648688 | 264.4140528 | 264.458136 | 264.4525264 | 264.1794192 | 261.2008824 |
| 264.473232 | 264.4668688 | 264.4160528 | 264.461136 | 264.4565264 | 264.1854192 | 261.2038824 |
| 264.475232 | 264.4688688 | 264.4160528 | 264.462136 | 264.4585264 | 264.1874192 | 261.2048824 |
| 264.473232 | 264.4698688 | 264.4180528 | 264.463136 | 264.4585264 | 264.1914192 | 261.2028824 |
| 264.476232 | 264.4718688 | 264.4170528 | 264.465136 | 264.4595264 | 264.1944192 | 261.2018824 |
| 264.477232 | 264.4728688 | 264.4190528 | 264.464136 | 264.4595264 | 264.1914192 | 261.2008824 |
| 264.477232 | 264.4728688 | 264.4210528 | 264.466136 | 264.4615264 | 264.1924192 | 261.2008824 |
| 264.477232 | 264.4708688 | 264.4200528 | 264.464136 | 264.4605264 | 264.1894192 | 261.1978824 |
| 264.477232 | 264.4708688 | 264.4200528 | 264.464136 | 264.4615264 | 264.1894192 | 261.1978824 |
| 264.476232 | 264.4728688 | 264.4220528 | 264.464136 | 264.4605264 | 264.1914192 | 261.1958824 |
| 264.476232 | 264.4738688 | 264.4240528 | 264.468136 | 264.4625264 | 264.1904192 | 261.1958824 |
| 264.474232 | 264.4698688 | 264.4240528 | 264.465136 | 264.4595264 | 264.1904192 | 261.1958824 |
| 264.474232 | 264.4698688 | 264.4220528 | 264.463136 | 264.4595264 | 264.1884192 | 261.1948824 |
| 264.474232 | 264.4728688 | 264.4250528 | 264.464136 | 264.4585264 | 264.1884192 | 261.1978824 |
| 264.476232 | 264.4728688 | 264.4250528 | 264.464136 | 264.4585264 | 264.1904192 | 261.1978824 |
| 264.476232 | 264.4738688 | 264.4250528 | 264.464136 | 264.4605264 | 264.1864192 | 261.1988824 |
| 264.474232 | 264.4728688 | 264.4280528 | 264.465136 | 264.4595264 | 264.1834192 | 261.1978824 |
| 264.475232 | 264.4728688 | 264.4260528 | 264.463136 | 264.4595264 | 264.1854192 | 261.1998824 |
| 264.473232 | 264.4748688 | 264.4280528 | 264.465136 | 264.4615264 | 264.1824192 | 261.1998824 |
| 264.474232 | 264.4738688 | 264.4270528 | 264.464136 | 264.4605264 | 264.1844192 | 261.1988824 |
| 264.474232 | 264.4738688 | 264.4280528 | 264.464136 | 264.4605264 | 264.1834192 | 261.1988824 |

|            |             |             |            |             |             |             |
|------------|-------------|-------------|------------|-------------|-------------|-------------|
| 264.474232 | 264.4738688 | 264.4260528 | 264.466136 | 264.4625264 | 264.1834192 | 261.1988824 |
| 264.476232 | 264.4768688 | 264.4280528 | 264.466136 | 264.4625264 | 264.1834192 | 261.1988824 |
| 264.478232 | 264.4768688 | 264.4310528 | 264.467136 | 264.4655264 | 264.1854192 | 261.2018824 |
| 264.477232 | 264.4758688 | 264.4300528 | 264.466136 | 264.4615264 | 264.1824192 | 261.1958824 |
| 264.477232 | 264.4758688 | 264.4300528 | 264.466136 | 264.4625264 | 264.1864192 | 261.1998824 |
| 264.479232 | 264.4738688 | 264.4280528 | 264.468136 | 264.4625264 | 264.1844192 | 261.1948824 |
| 264.478232 | 264.4758688 | 264.4310528 | 264.466136 | 264.4645264 | 264.1874192 | 261.1978824 |
| 264.477232 | 264.4758688 | 264.4320528 | 264.466136 | 264.4615264 | 264.1844192 | 261.1978824 |
| 264.476232 | 264.4758688 | 264.4320528 | 264.465136 | 264.4615264 | 264.1844192 | 261.1978824 |
| 264.477232 | 264.4778688 | 264.4300528 | 264.466136 | 264.4615264 | 264.1844192 | 261.1998824 |
| 264.474232 | 264.4738688 | 264.4320528 | 264.465136 | 264.4615264 | 264.1844192 | 261.1978824 |
| 264.476232 | 264.4758688 | 264.4320528 | 264.465136 | 264.4595264 | 264.1824192 | 261.1978824 |
| 264.476232 | 264.4738688 | 264.4340528 | 264.465136 | 264.4615264 | 264.1824192 | 261.1998824 |
| 264.476232 | 264.4758688 | 264.4360528 | 264.463136 | 264.4595264 | 264.1794192 | 261.1998824 |
| 264.474232 | 264.4738688 | 264.4360528 | 264.463136 | 264.4595264 | 264.1794192 | 261.1998824 |
| 264.471232 | 264.4718688 | 264.4350528 | 264.460136 | 264.4575264 | 264.1764192 | 261.1988824 |
| 264.473232 | 264.4718688 | 264.4330528 | 264.461136 | 264.4575264 | 264.1744192 | 261.1968824 |
| 264.473232 | 264.4728688 | 264.4350528 | 264.459136 | 264.4555264 | 264.1764192 | 261.1988824 |
| 264.470232 | 264.4698688 | 264.4340528 | 264.459136 | 264.4545264 | 264.1754192 | 261.1988824 |
| 264.470232 | 264.4698688 | 264.4340528 | 264.459136 | 264.4545264 | 264.1734192 | 261.2008824 |
| 264.467232 | 264.4708688 | 264.4360528 | 264.459136 | 264.4525264 | 264.1704192 | 261.1988824 |
| 264.470232 | 264.4708688 | 264.4340528 | 264.456136 | 264.4555264 | 264.1724192 | 261.1978824 |
| 264.467232 | 264.4688688 | 264.4340528 | 264.455136 | 264.4535264 | 264.1694192 | 261.1958824 |
| 264.468232 | 264.4698688 | 264.4370528 | 264.456136 | 264.4525264 | 264.1714192 | 261.1988824 |
| 264.465232 | 264.4678688 | 264.4360528 | 264.455136 | 264.4495264 | 264.1704192 | 261.1958824 |
| 264.468232 | 264.4688688 | 264.4370528 | 264.456136 | 264.4505264 | 264.1684192 | 261.1968824 |
| 264.465232 | 264.4658688 | 264.4370528 | 264.455136 | 264.4495264 | 264.1664192 | 261.1958824 |
| 264.464232 | 264.4658688 | 264.4370528 | 264.454136 | 264.4495264 | 264.1664192 | 261.1958824 |
| 264.464232 | 264.4658688 | 264.4350528 | 264.451136 | 264.4455264 | 264.1644192 | 261.1958824 |
| 264.462232 | 264.4638688 | 264.4330528 | 264.451136 | 264.4435264 | 264.1624192 | 261.1938824 |
| 264.460232 | 264.4628688 | 264.4330528 | 264.449136 | 264.4435264 | 264.1644192 | 261.1908824 |
| 264.462232 | 264.4638688 | 264.4330528 | 264.451136 | 264.4455264 | 264.1604192 | 261.1918824 |
| 264.462232 | 264.4618688 | 264.4330528 | 264.449136 | 264.4425264 | 264.1624192 | 261.1938824 |
| 264.462232 | 264.4618688 | 264.4340528 | 264.449136 | 264.4445264 | 264.1624192 | 261.1908824 |
| 264.458232 | 264.4608688 | 264.4310528 | 264.447136 | 264.4435264 | 264.1624192 | 261.1918824 |
| 264.460232 | 264.4608688 | 264.4330528 | 264.449136 | 264.4415264 | 264.1584192 | 261.1908824 |
| 264.461232 | 264.4638688 | 264.4340528 | 264.449136 | 264.4445264 | 264.1594192 | 261.1938824 |
| 264.460232 | 264.4618688 | 264.4340528 | 264.447136 | 264.4425264 | 264.1584192 | 261.1898824 |
| 264.458232 | 264.4588688 | 264.4340528 | 264.447136 | 264.4405264 | 264.1584192 | 261.1898824 |
| 264.456232 | 264.4588688 | 264.4330528 | 264.445136 | 264.4415264 | 264.1584192 | 261.1888824 |
| 264.456232 | 264.4588688 | 264.4330528 | 264.446136 | 264.4395264 | 264.1564192 | 261.1868824 |
| 264.456232 | 264.4588688 | 264.4310528 | 264.444136 | 264.4375264 | 264.1564192 | 261.1868824 |
| 264.456232 | 264.4588688 | 264.4330528 | 264.444136 | 264.4395264 | 264.1564192 | 261.1868824 |
| 264.458232 | 264.4588688 | 264.4330528 | 264.444136 | 264.4375264 | 264.1544192 | 261.1868824 |
| 264.454232 | 264.4558688 | 264.4320528 | 264.443136 | 264.4385264 | 264.1554192 | 261.1848824 |
| 264.455232 | 264.4578688 | 264.4340528 | 264.443136 | 264.4385264 | 264.1534192 | 261.1848824 |
| 264.454232 | 264.4568688 | 264.4320528 | 264.441136 | 264.4375264 | 264.1564192 | 261.1848824 |



|            |             |             |            |             |             |             |
|------------|-------------|-------------|------------|-------------|-------------|-------------|
| 264.453232 | 264.4568688 | 264.4340528 | 264.441136 | 264.4355264 | 264.1544192 | 261.1828824 |
| 264.453232 | 264.4568688 | 264.4330528 | 264.441136 | 264.4375264 | 264.1544192 | 261.1828824 |
| 264.453232 | 264.4548688 | 264.4340528 | 264.443136 | 264.4355264 | 264.1544192 | 261.1848824 |
| 264.451232 | 264.4538688 | 264.4310528 | 264.439136 | 264.4325264 | 264.1534192 | 261.1798824 |
| 264.453232 | 264.4548688 | 264.4330528 | 264.441136 | 264.4355264 | 264.1514192 | 261.1818824 |
| 264.450232 | 264.4518688 | 264.4300528 | 264.439136 | 264.4325264 | 264.1514192 | 261.1788824 |
| 264.451232 | 264.4538688 | 264.4310528 | 264.439136 | 264.4305264 | 264.1494192 | 261.1798824 |
| 264.449232 | 264.4518688 | 264.4310528 | 264.440136 | 264.4325264 | 264.1514192 | 261.1798824 |
| 264.450232 | 264.4518688 | 264.4280528 | 264.437136 | 264.4325264 | 264.1484192 | 261.1808824 |
| 264.449232 | 264.4518688 | 264.4310528 | 264.437136 | 264.4325264 | 264.1474192 | 261.1838824 |
| 264.448232 | 264.4508688 | 264.4300528 | 264.437136 | 264.4325264 | 264.1494192 | 261.1818824 |
| 264.448232 | 264.4508688 | 264.4300528 | 264.437136 | 264.4315264 | 264.1484192 | 261.1788824 |
| 264.448232 | 264.4488688 | 264.4280528 | 264.437136 | 264.4315264 | 264.1484192 | 261.1788824 |
| 264.449232 | 264.4498688 | 264.4290528 | 264.438136 | 264.4305264 | 264.1474192 | 261.1758824 |
| 264.450232 | 264.4508688 | 264.4300528 | 264.437136 | 264.4315264 | 264.1484192 | 261.1788824 |
| 264.449232 | 264.4498688 | 264.4290528 | 264.438136 | 264.4315264 | 264.1504192 | 261.1778824 |
| 264.448232 | 264.4498688 | 264.4290528 | 264.436136 | 264.4305264 | 264.1494192 | 261.1748824 |
| 264.448232 | 264.4488688 | 264.4280528 | 264.437136 | 264.4295264 | 264.1464192 | 261.1748824 |
| 264.449232 | 264.4488688 | 264.4260528 | 264.438136 | 264.4335264 | 264.1504192 | 261.1768824 |
| 264.452232 | 264.4518688 | 264.4300528 | 264.438136 | 264.4345264 | 264.1554192 | 261.1748824 |
| 264.449232 | 264.4488688 | 264.4270528 | 264.437136 | 264.4335264 | 264.1514192 | 261.1758824 |
| 264.453232 | 264.4498688 | 264.4290528 | 264.439136 | 264.4335264 | 264.1524192 | 261.1768824 |
| 264.453232 | 264.4508688 | 264.4270528 | 264.439136 | 264.4335264 | 264.1514192 | 261.1758824 |
| 264.450232 | 264.4488688 | 264.4280528 | 264.438136 | 264.4305264 | 264.1484192 | 261.1728824 |
| 264.452232 | 264.4508688 | 264.4300528 | 264.439136 | 264.4355264 | 264.1524192 | 261.1758824 |
| 264.452232 | 264.4528688 | 264.4300528 | 264.439136 | 264.4325264 | 264.1524192 | 261.1728824 |
| 264.451232 | 264.4508688 | 264.4300528 | 264.441136 | 264.4345264 | 264.1564192 | 261.1748824 |
| 264.453232 | 264.4528688 | 264.4290528 | 264.441136 | 264.4365264 | 264.1544192 | 261.1728824 |
| 264.453232 | 264.4508688 | 264.4290528 | 264.440136 | 264.4365264 | 264.1524192 | 261.1718824 |
| 264.451232 | 264.4528688 | 264.4290528 | 264.441136 | 264.4365264 | 264.1564192 | 261.1728824 |
| 264.453232 | 264.4548688 | 264.4290528 | 264.441136 | 264.4365264 | 264.1564192 | 261.1728824 |
| 264.454232 | 264.4538688 | 264.4300528 | 264.443136 | 264.4365264 | 264.1574192 | 261.1748824 |
| 264.451232 | 264.4528688 | 264.4290528 | 264.442136 | 264.4335264 | 264.1544192 | 261.1698824 |
| 264.453232 | 264.4558688 | 264.4300528 | 264.443136 | 264.4345264 | 264.1584192 | 261.1728824 |
| 264.451232 | 264.4548688 | 264.4290528 | 264.442136 | 264.4365264 | 264.1564192 | 261.1718824 |
| 264.451232 | 264.4528688 | 264.4310528 | 264.440136 | 264.4335264 | 264.1564192 | 261.1738824 |
| 264.455232 | 264.4548688 | 264.4310528 | 264.440136 | 264.4355264 | 264.1584192 | 261.1738824 |
| 264.455232 | 264.4558688 | 264.4300528 | 264.443136 | 264.4365264 | 264.1604192 | 261.1728824 |
| 264.453232 | 264.4548688 | 264.4310528 | 264.442136 | 264.4355264 | 264.1564192 | 261.1718824 |
| 264.453232 | 264.4548688 | 264.4310528 | 264.440136 | 264.4355264 | 264.1564192 | 261.1748824 |
| 264.453232 | 264.4548688 | 264.4320528 | 264.440136 | 264.4365264 | 264.1544192 | 261.1718824 |
| 264.455232 | 264.4558688 | 264.4340528 | 264.441136 | 264.4365264 | 264.1564192 | 261.1748824 |
| 264.453232 | 264.4548688 | 264.4290528 | 264.440136 | 264.4355264 | 264.1564192 | 261.1738824 |
| 264.451232 | 264.4528688 | 264.4320528 | 264.440136 | 264.4335264 | 264.1564192 | 261.1718824 |
| 264.451232 | 264.4558688 | 264.4340528 | 264.440136 | 264.4335264 | 264.1544192 | 261.1748824 |
| 264.450232 | 264.4518688 | 264.4310528 | 264.439136 | 264.4305264 | 264.1514192 | 261.1738824 |
| 264.448232 | 264.4488688 | 264.4300528 | 264.436136 | 264.4285264 | 264.1524192 | 261.1718824 |

|            |             |             |            |             |             |             |
|------------|-------------|-------------|------------|-------------|-------------|-------------|
| 264.448232 | 264.4498688 | 264.4300528 | 264.437136 | 264.4305264 | 264.1524192 | 261.1718824 |
| 264.444232 | 264.4488688 | 264.4290528 | 264.434136 | 264.4265264 | 264.1514192 | 261.1738824 |
| 264.448232 | 264.4498688 | 264.4310528 | 264.437136 | 264.4285264 | 264.1514192 | 261.1738824 |
| 264.446232 | 264.4488688 | 264.4310528 | 264.432136 | 264.4255264 | 264.1504192 | 261.1768824 |
| 264.448232 | 264.4478688 | 264.4320528 | 264.433136 | 264.4285264 | 264.1494192 | 261.1768824 |
| 264.441232 | 264.4448688 | 264.4330528 | 264.431136 | 264.4235264 | 264.1484192 | 261.1738824 |
| 264.444232 | 264.4468688 | 264.4290528 | 264.431136 | 264.4235264 | 264.1464192 | 261.1758824 |
| 264.441232 | 264.4458688 | 264.4300528 | 264.429136 | 264.4235264 | 264.1454192 | 261.1758824 |
| 264.443232 | 264.4438688 | 264.4310528 | 264.429136 | 264.4205264 | 264.1464192 | 261.1758824 |
| 264.441232 | 264.4438688 | 264.4310528 | 264.427136 | 264.4225264 | 264.1434192 | 261.1738824 |
| 264.439232 | 264.4418688 | 264.4310528 | 264.426136 | 264.4205264 | 264.1424192 | 261.1758824 |
| 264.438232 | 264.4408688 | 264.4280528 | 264.426136 | 264.4205264 | 264.1414192 | 261.1758824 |
| 264.438232 | 264.4428688 | 264.4310528 | 264.423136 | 264.4185264 | 264.1434192 | 261.1758824 |
| 264.438232 | 264.4408688 | 264.4280528 | 264.424136 | 264.4165264 | 264.1394192 | 261.1758824 |
| 264.436232 | 264.4388688 | 264.4280528 | 264.423136 | 264.4175264 | 264.1364192 | 261.1728824 |
| 264.433232 | 264.4388688 | 264.4280528 | 264.421136 | 264.4155264 | 264.1404192 | 261.1758824 |
| 264.433232 | 264.4378688 | 264.4280528 | 264.421136 | 264.4135264 | 264.1364192 | 261.1728824 |
| 264.431232 | 264.4348688 | 264.4280528 | 264.418136 | 264.4105264 | 264.1324192 | 261.1728824 |
| 264.432232 | 264.4358688 | 264.4280528 | 264.419136 | 264.4135264 | 264.1344192 | 261.1718824 |
| 264.432232 | 264.4358688 | 264.4280528 | 264.418136 | 264.4105264 | 264.1344192 | 261.1718824 |
| 264.432232 | 264.4358688 | 264.4280528 | 264.418136 | 264.4115264 | 264.1354192 | 261.1718824 |
| 264.428232 | 264.4338688 | 264.4280528 | 264.414136 | 264.4095264 | 264.1334192 | 261.1708824 |
| 264.427232 | 264.4308688 | 264.4260528 | 264.415136 | 264.4065264 | 264.1304192 | 261.1688824 |
| 264.425232 | 264.4328688 | 264.4260528 | 264.415136 | 264.4065264 | 264.1324192 | 261.1688824 |
| 264.422232 | 264.4288688 | 264.4230528 | 264.410136 | 264.4035264 | 264.1274192 | 261.1678824 |
| 264.422232 | 264.4288688 | 264.4230528 | 264.410136 | 264.4035264 | 264.1294192 | 261.1678824 |
| 264.422232 | 264.4288688 | 264.4230528 | 264.412136 | 264.4035264 | 264.1264192 | 261.1678824 |
| 264.419232 | 264.4268688 | 264.4220528 | 264.409136 | 264.4025264 | 264.1264192 | 261.1648824 |
| 264.421232 | 264.4268688 | 264.4220528 | 264.407136 | 264.4005264 | 264.1244192 | 261.1648824 |
| 264.422232 | 264.4288688 | 264.4230528 | 264.407136 | 264.4025264 | 264.1274192 | 261.1658824 |
| 264.420232 | 264.4258688 | 264.4230528 | 264.409136 | 264.4005264 | 264.1244192 | 261.1658824 |
| 264.420232 | 264.4238688 | 264.4220528 | 264.407136 | 264.4005264 | 264.1264192 | 261.1628824 |
| 264.418232 | 264.4238688 | 264.4220528 | 264.407136 | 264.3985264 | 264.1244192 | 261.1628824 |
| 264.418232 | 264.4238688 | 264.4230528 | 264.405136 | 264.3985264 | 264.1224192 | 261.1628824 |
| 264.418232 | 264.4238688 | 264.4210528 | 264.405136 | 264.3985264 | 264.1244192 | 261.1628824 |
| 264.420232 | 264.4228688 | 264.4210528 | 264.405136 | 264.3985264 | 264.1244192 | 261.1628824 |
| 264.417232 | 264.4228688 | 264.4200528 | 264.404136 | 264.3975264 | 264.1224192 | 261.1618824 |
| 264.417232 | 264.4208688 | 264.4200528 | 264.404136 | 264.3975264 | 264.1224192 | 261.1598824 |
| 264.417232 | 264.4208688 | 264.4200528 | 264.404136 | 264.3975264 | 264.1244192 | 261.1598824 |
| 264.419232 | 264.4228688 | 264.4200528 | 264.405136 | 264.3975264 | 264.1224192 | 261.1598824 |
| 264.416232 | 264.4198688 | 264.4170528 | 264.403136 | 264.3965264 | 264.1214192 | 261.1568824 |
| 264.414232 | 264.4188688 | 264.4160528 | 264.401136 | 264.3935264 | 264.1204192 | 261.1578824 |
| 264.418232 | 264.4198688 | 264.4170528 | 264.404136 | 264.3965264 | 264.1194192 | 261.1568824 |
| 264.419232 | 264.4228688 | 264.4170528 | 264.406136 | 264.3955264 | 264.1234192 | 261.1588824 |
| 264.419232 | 264.4228688 | 264.4170528 | 264.406136 | 264.3975264 | 264.1254192 | 261.1568824 |
| 264.420232 | 264.4218688 | 264.4140528 | 264.405136 | 264.3965264 | 264.1244192 | 261.1548824 |
| 264.422232 | 264.4248688 | 264.4160528 | 264.408136 | 264.4015264 | 264.1254192 | 261.1538824 |

|            |             |             |            |             |             |             |
|------------|-------------|-------------|------------|-------------|-------------|-------------|
| 264.427232 | 264.4258688 | 264.4170528 | 264.411136 | 264.4035264 | 264.1304192 | 261.1558824 |
| 264.426232 | 264.4258688 | 264.4140528 | 264.413136 | 264.4035264 | 264.1314192 | 261.1528824 |
| 264.429232 | 264.4298688 | 264.4160528 | 264.414136 | 264.4075264 | 264.1364192 | 261.1528824 |
| 264.428232 | 264.4268688 | 264.4140528 | 264.417136 | 264.4075264 | 264.1354192 | 261.1518824 |
| 264.430232 | 264.4318688 | 264.4150528 | 264.418136 | 264.4075264 | 264.1374192 | 261.1518824 |
| 264.432232 | 264.4318688 | 264.4140528 | 264.417136 | 264.4115264 | 264.1414192 | 261.1498824 |
| 264.435232 | 264.4328688 | 264.4150528 | 264.421136 | 264.4125264 | 264.1444192 | 261.1518824 |
| 264.435232 | 264.4358688 | 264.4170528 | 264.425136 | 264.4165264 | 264.1434192 | 261.1528824 |
| 264.434232 | 264.4328688 | 264.4140528 | 264.422136 | 264.4155264 | 264.1454192 | 261.1488824 |
| 264.437232 | 264.4348688 | 264.4150528 | 264.425136 | 264.4175264 | 264.1464192 | 261.1488824 |
| 264.435232 | 264.4368688 | 264.4160528 | 264.425136 | 264.4185264 | 264.1474192 | 261.1508824 |
| 264.439232 | 264.4388688 | 264.4150528 | 264.425136 | 264.4155264 | 264.1494192 | 261.1488824 |
| 264.441232 | 264.4388688 | 264.4180528 | 264.427136 | 264.4195264 | 264.1494192 | 261.1488824 |
| 264.441232 | 264.4398688 | 264.4190528 | 264.427136 | 264.4195264 | 264.1524192 | 261.1498824 |
| 264.441232 | 264.4398688 | 264.4170528 | 264.428136 | 264.4195264 | 264.1524192 | 261.1518824 |
| 264.440232 | 264.4388688 | 264.4180528 | 264.428136 | 264.4205264 | 264.1514192 | 261.1518824 |
| 264.442232 | 264.4408688 | 264.4180528 | 264.429136 | 264.4215264 | 264.1514192 | 261.1518824 |
| 264.443232 | 264.4418688 | 264.4200528 | 264.431136 | 264.4225264 | 264.1524192 | 261.1538824 |
| 264.440232 | 264.4408688 | 264.4180528 | 264.426136 | 264.4185264 | 264.1514192 | 261.1518824 |
| 264.440232 | 264.4418688 | 264.4190528 | 264.428136 | 264.4185264 | 264.1504192 | 261.1558824 |
| 264.439232 | 264.4388688 | 264.4160528 | 264.425136 | 264.4185264 | 264.1494192 | 261.1548824 |
| 264.440232 | 264.4388688 | 264.4180528 | 264.426136 | 264.4165264 | 264.1494192 | 261.1568824 |
| 264.440232 | 264.4408688 | 264.4200528 | 264.426136 | 264.4185264 | 264.1484192 | 261.1548824 |
| 264.439232 | 264.4418688 | 264.4200528 | 264.426136 | 264.4185264 | 264.1494192 | 261.1568824 |
| 264.442232 | 264.4418688 | 264.4210528 | 264.429136 | 264.4205264 | 264.1514192 | 261.1598824 |
| 264.440232 | 264.4438688 | 264.4210528 | 264.428136 | 264.4205264 | 264.1494192 | 261.1608824 |
| 264.438232 | 264.4408688 | 264.4200528 | 264.426136 | 264.4185264 | 264.1474192 | 261.1628824 |
| 264.440232 | 264.4418688 | 264.4200528 | 264.426136 | 264.4185264 | 264.1494192 | 261.1608824 |
| 264.440232 | 264.4418688 | 264.4210528 | 264.424136 | 264.4195264 | 264.1504192 | 261.1628824 |
| 264.439232 | 264.4398688 | 264.4220528 | 264.424136 | 264.4165264 | 264.1484192 | 261.1638824 |
| 264.437232 | 264.4398688 | 264.4200528 | 264.426136 | 264.4175264 | 264.1484192 | 261.1638824 |
| 264.437232 | 264.4398688 | 264.4240528 | 264.424136 | 264.4175264 | 264.1464192 | 261.1638824 |
| 264.437232 | 264.4368688 | 264.4220528 | 264.424136 | 264.4155264 | 264.1464192 | 261.1658824 |
| 264.438232 | 264.4378688 | 264.4230528 | 264.425136 | 264.4165264 | 264.1474192 | 261.1648824 |
| 264.435232 | 264.4378688 | 264.4180528 | 264.420136 | 264.4155264 | 264.1404192 | 261.1638824 |
| 264.435232 | 264.4368688 | 264.4200528 | 264.420136 | 264.4155264 | 264.1424192 | 261.1638824 |
| 264.433232 | 264.4368688 | 264.4200528 | 264.419136 | 264.4135264 | 264.1444192 | 261.1618824 |
| 264.433232 | 264.4368688 | 264.4200528 | 264.419136 | 264.4135264 | 264.1404192 | 261.1638824 |
| 264.433232 | 264.4348688 | 264.4180528 | 264.419136 | 264.4155264 | 264.1404192 | 261.1618824 |
| 264.433232 | 264.4348688 | 264.4210528 | 264.419136 | 264.4135264 | 264.1424192 | 261.1638824 |
| 264.431232 | 264.4338688 | 264.4180528 | 264.417136 | 264.4125264 | 264.1394192 | 261.1608824 |
| 264.431232 | 264.4338688 | 264.4180528 | 264.419136 | 264.4135264 | 264.1404192 | 261.1618824 |
| 264.429232 | 264.4318688 | 264.4180528 | 264.417136 | 264.4085264 | 264.1364192 | 261.1608824 |
| 264.431232 | 264.4328688 | 264.4180528 | 264.417136 | 264.4115264 | 264.1404192 | 261.1618824 |
| 264.428232 | 264.4308688 | 264.4160528 | 264.416136 | 264.4105264 | 264.1364192 | 261.1608824 |
| 264.431232 | 264.4318688 | 264.4180528 | 264.417136 | 264.4085264 | 264.1364192 | 261.1598824 |
| 264.429232 | 264.4328688 | 264.4180528 | 264.417136 | 264.4095264 | 264.1364192 | 261.1598824 |

|            |             |             |            |             |             |             |
|------------|-------------|-------------|------------|-------------|-------------|-------------|
| 264.428232 | 264.4328688 | 264.4190528 | 264.415136 | 264.4095264 | 264.1364192 | 261.1628824 |
| 264.428232 | 264.4328688 | 264.4170528 | 264.418136 | 264.4095264 | 264.1374192 | 261.1628824 |
| 264.431232 | 264.4308688 | 264.4180528 | 264.418136 | 264.4105264 | 264.1404192 | 261.1608824 |
| 264.429232 | 264.4308688 | 264.4160528 | 264.416136 | 264.4095264 | 264.1354192 | 261.1608824 |
| 264.428232 | 264.4308688 | 264.4180528 | 264.416136 | 264.4095264 | 264.1374192 | 261.1608824 |
| 264.426232 | 264.4308688 | 264.4160528 | 264.415136 | 264.4095264 | 264.1374192 | 261.1608824 |
| 264.426232 | 264.4308688 | 264.4160528 | 264.413136 | 264.4085264 | 264.1364192 | 261.1588824 |
| 264.427232 | 264.4298688 | 264.4160528 | 264.413136 | 264.4075264 | 264.1344192 | 261.1588824 |
| 264.427232 | 264.4298688 | 264.4160528 | 264.416136 | 264.4085264 | 264.1364192 | 261.1608824 |
| 264.424232 | 264.4298688 | 264.4140528 | 264.411136 | 264.4055264 | 264.1334192 | 261.1578824 |
| 264.424232 | 264.4278688 | 264.4130528 | 264.413136 | 264.4055264 | 264.1314192 | 261.1558824 |
| 264.422232 | 264.4268688 | 264.4150528 | 264.410136 | 264.4035264 | 264.1314192 | 261.1578824 |
| 264.424232 | 264.4278688 | 264.4140528 | 264.414136 | 264.4075264 | 264.1334192 | 261.1558824 |
| 264.422232 | 264.4268688 | 264.4130528 | 264.411136 | 264.4035264 | 264.1334192 | 261.1558824 |
| 264.423232 | 264.4268688 | 264.4120528 | 264.410136 | 264.4025264 | 264.1304192 | 261.1548824 |
| 264.423232 | 264.4268688 | 264.4120528 | 264.412136 | 264.4045264 | 264.1304192 | 261.1568824 |
| 264.424232 | 264.4248688 | 264.4130528 | 264.410136 | 264.4045264 | 264.1304192 | 261.1568824 |
| 264.423232 | 264.4268688 | 264.4120528 | 264.412136 | 264.4025264 | 264.1324192 | 261.1568824 |
| 264.426232 | 264.4268688 | 264.4130528 | 264.415136 | 264.4055264 | 264.1334192 | 261.1578824 |
| 264.424232 | 264.4268688 | 264.4130528 | 264.411136 | 264.4045264 | 264.1324192 | 261.1578824 |
| 264.425232 | 264.4258688 | 264.4120528 | 264.412136 | 264.4025264 | 264.1314192 | 261.1538824 |
| 264.425232 | 264.4288688 | 264.4140528 | 264.415136 | 264.4055264 | 264.1344192 | 261.1568824 |
| 264.429232 | 264.4298688 | 264.4140528 | 264.417136 | 264.4095264 | 264.1344192 | 261.1568824 |
| 264.426232 | 264.4288688 | 264.4130528 | 264.415136 | 264.4065264 | 264.1364192 | 261.1538824 |
| 264.428232 | 264.4298688 | 264.4150528 | 264.418136 | 264.4095264 | 264.1374192 | 261.1548824 |
| 264.427232 | 264.4288688 | 264.4120528 | 264.413136 | 264.4065264 | 264.1344192 | 261.1548824 |
| 264.429232 | 264.4298688 | 264.4120528 | 264.417136 | 264.4095264 | 264.1364192 | 261.1538824 |
| 264.428232 | 264.4298688 | 264.4150528 | 264.415136 | 264.4075264 | 264.1374192 | 261.1538824 |
| 264.430232 | 264.4318688 | 264.4140528 | 264.418136 | 264.4115264 | 264.1374192 | 261.1548824 |
| 264.431232 | 264.4318688 | 264.4120528 | 264.418136 | 264.4095264 | 264.1384192 | 261.1518824 |
| 264.432232 | 264.4328688 | 264.4170528 | 264.419136 | 264.4125264 | 264.1374192 | 261.1548824 |
| 264.432232 | 264.4328688 | 264.4150528 | 264.419136 | 264.4125264 | 264.1424192 | 261.1528824 |
| 264.432232 | 264.4318688 | 264.4150528 | 264.418136 | 264.4125264 | 264.1434192 | 261.1518824 |
| 264.434232 | 264.4328688 | 264.4140528 | 264.420136 | 264.4135264 | 264.1404192 | 261.1538824 |
| 264.434232 | 264.4358688 | 264.4150528 | 264.423136 | 264.4145264 | 264.1434192 | 261.1538824 |
| 264.434232 | 264.4328688 | 264.4160528 | 264.420136 | 264.4135264 | 264.1414192 | 261.1518824 |
| 264.433232 | 264.4348688 | 264.4130528 | 264.422136 | 264.4155264 | 264.1444192 | 261.1518824 |
| 264.436232 | 264.4398688 | 264.4170528 | 264.424136 | 264.4175264 | 264.1464192 | 261.1538824 |
| 264.434232 | 264.4368688 | 264.4140528 | 264.421136 | 264.4145264 | 264.1434192 | 261.1538824 |
| 264.436232 | 264.4378688 | 264.4150528 | 264.421136 | 264.4125264 | 264.1434192 | 261.1548824 |
| 264.435232 | 264.4388688 | 264.4150528 | 264.423136 | 264.4175264 | 264.1444192 | 261.1568824 |
| 264.437232 | 264.4378688 | 264.4190528 | 264.424136 | 264.4155264 | 264.1444192 | 261.1568824 |
| 264.432232 | 264.4348688 | 264.4170528 | 264.421136 | 264.4125264 | 264.1434192 | 261.1548824 |
| 264.437232 | 264.4378688 | 264.4180528 | 264.424136 | 264.4185264 | 264.1454192 | 261.1558824 |
| 264.438232 | 264.4388688 | 264.4200528 | 264.425136 | 264.4185264 | 264.1474192 | 261.1578824 |
| 264.433232 | 264.4358688 | 264.4180528 | 264.421136 | 264.4155264 | 264.1424192 | 261.1578824 |
| 264.436232 | 264.4388688 | 264.4210528 | 264.424136 | 264.4165264 | 264.1454192 | 261.1588824 |

|            |             |             |            |             |             |             |
|------------|-------------|-------------|------------|-------------|-------------|-------------|
| 264.435232 | 264.4378688 | 264.4180528 | 264.422136 | 264.4155264 | 264.1444192 | 261.1578824 |
| 264.435232 | 264.4358688 | 264.4180528 | 264.421136 | 264.4135264 | 264.1444192 | 261.1578824 |
| 264.434232 | 264.4368688 | 264.4210528 | 264.422136 | 264.4145264 | 264.1454192 | 261.1608824 |
| 264.432232 | 264.4358688 | 264.4190528 | 264.420136 | 264.4115264 | 264.1434192 | 261.1588824 |
| 264.433232 | 264.4358688 | 264.4190528 | 264.420136 | 264.4145264 | 264.1424192 | 261.1608824 |
| 264.432232 | 264.4358688 | 264.4170528 | 264.417136 | 264.4125264 | 264.1424192 | 261.1608824 |
| 264.430232 | 264.4338688 | 264.4190528 | 264.417136 | 264.4115264 | 264.1414192 | 261.1608824 |
| 264.431232 | 264.4338688 | 264.4180528 | 264.418136 | 264.4105264 | 264.1404192 | 261.1618824 |
| 264.428232 | 264.4328688 | 264.4170528 | 264.415136 | 264.4095264 | 264.1394192 | 261.1618824 |
| 264.426232 | 264.4308688 | 264.4190528 | 264.410136 | 264.4065264 | 264.1394192 | 261.1608824 |
| 264.426232 | 264.4308688 | 264.4170528 | 264.414136 | 264.4075264 | 264.1374192 | 261.1618824 |
| 264.423232 | 264.4288688 | 264.4170528 | 264.409136 | 264.4045264 | 264.1354192 | 261.1618824 |
| 264.423232 | 264.4288688 | 264.4190528 | 264.409136 | 264.4025264 | 264.1354192 | 261.1618824 |
| 264.422232 | 264.4288688 | 264.4200528 | 264.410136 | 264.4035264 | 264.1364192 | 261.1628824 |
| 264.420232 | 264.4258688 | 264.4170528 | 264.407136 | 264.4025264 | 264.1314192 | 261.1598824 |
| 264.420232 | 264.4258688 | 264.4180528 | 264.405136 | 264.4005264 | 264.1314192 | 261.1618824 |
| 264.415232 | 264.4228688 | 264.4130528 | 264.404136 | 264.3955264 | 264.1264192 | 261.1588824 |
| 264.418232 | 264.4228688 | 264.4140528 | 264.400136 | 264.3985264 | 264.1254192 | 261.1618824 |
| 264.416232 | 264.4228688 | 264.4140528 | 264.400136 | 264.3935264 | 264.1274192 | 261.1598824 |
| 264.416232 | 264.4198688 | 264.4140528 | 264.403136 | 264.3945264 | 264.1254192 | 261.1608824 |
| 264.415232 | 264.4218688 | 264.4170528 | 264.401136 | 264.3935264 | 264.1264192 | 261.1618824 |
| 264.414232 | 264.4178688 | 264.4140528 | 264.398136 | 264.3905264 | 264.1244192 | 261.1598824 |
| 264.411232 | 264.4188688 | 264.4150528 | 264.398136 | 264.3885264 | 264.1224192 | 261.1608824 |
| 264.411232 | 264.4188688 | 264.4140528 | 264.397136 | 264.3905264 | 264.1224192 | 261.1588824 |
| 264.409232 | 264.4168688 | 264.4130528 | 264.394136 | 264.3885264 | 264.1204192 | 261.1568824 |
| 264.409232 | 264.4168688 | 264.4120528 | 264.396136 | 264.3885264 | 264.1194192 | 261.1588824 |
| 264.408232 | 264.4148688 | 264.4120528 | 264.394136 | 264.3875264 | 264.1174192 | 261.1588824 |
| 264.406232 | 264.4148688 | 264.4120528 | 264.394136 | 264.3875264 | 264.1174192 | 261.1568824 |
| 264.406232 | 264.4158688 | 264.4130528 | 264.395136 | 264.3855264 | 264.1184192 | 261.1578824 |
| 264.404232 | 264.4118688 | 264.4100528 | 264.394136 | 264.3825264 | 264.1154192 | 261.1548824 |
| 264.404232 | 264.4118688 | 264.4100528 | 264.392136 | 264.3845264 | 264.1154192 | 261.1548824 |
| 264.404232 | 264.4098688 | 264.4080528 | 264.392136 | 264.3825264 | 264.1154192 | 261.1498824 |
| 264.406232 | 264.4118688 | 264.4100528 | 264.392136 | 264.3835264 | 264.1134192 | 261.1528824 |
| 264.405232 | 264.4128688 | 264.4120528 | 264.393136 | 264.3835264 | 264.1114192 | 261.1528824 |
| 264.404232 | 264.4098688 | 264.4100528 | 264.390136 | 264.3825264 | 264.1114192 | 261.1518824 |
| 264.405232 | 264.4108688 | 264.4100528 | 264.393136 | 264.3835264 | 264.1144192 | 261.1528824 |
| 264.403232 | 264.4078688 | 264.4070528 | 264.390136 | 264.3805264 | 264.1114192 | 261.1498824 |
| 264.403232 | 264.4078688 | 264.4060528 | 264.390136 | 264.3805264 | 264.1094192 | 261.1478824 |
| 264.402232 | 264.4058688 | 264.4060528 | 264.388136 | 264.3805264 | 264.1114192 | 261.1468824 |
| 264.403232 | 264.4058688 | 264.4070528 | 264.388136 | 264.3795264 | 264.1104192 | 261.1458824 |
| 264.406232 | 264.4088688 | 264.4100528 | 264.389136 | 264.3825264 | 264.1114192 | 261.1488824 |
| 264.403232 | 264.4058688 | 264.4070528 | 264.390136 | 264.3795264 | 264.1104192 | 261.1458824 |
| 264.403232 | 264.4058688 | 264.4070528 | 264.388136 | 264.3795264 | 264.1104192 | 261.1458824 |
| 264.404232 | 264.4078688 | 264.4060528 | 264.391136 | 264.3825264 | 264.1134192 | 261.1478824 |
| 264.403232 | 264.4058688 | 264.4050528 | 264.390136 | 264.3795264 | 264.1084192 | 261.1428824 |
| 264.403232 | 264.4078688 | 264.4050528 | 264.391136 | 264.3815264 | 264.1124192 | 261.1428824 |
| 264.403232 | 264.4098688 | 264.4030528 | 264.391136 | 264.3835264 | 264.1124192 | 261.1418824 |

|            |             |             |            |             |             |             |
|------------|-------------|-------------|------------|-------------|-------------|-------------|
| 264.405232 | 264.4098688 | 264.4040528 | 264.393136 | 264.3815264 | 264.1144192 | 261.1428824 |
| 264.405232 | 264.4078688 | 264.4040528 | 264.393136 | 264.3845264 | 264.1164192 | 261.1398824 |
| 264.407232 | 264.4108688 | 264.4050528 | 264.396136 | 264.3845264 | 264.1164192 | 261.1398824 |
| 264.410232 | 264.4128688 | 264.4050528 | 264.396136 | 264.3885264 | 264.1194192 | 261.1418824 |
| 264.414232 | 264.4138688 | 264.4050528 | 264.401136 | 264.3915264 | 264.1234192 | 261.1418824 |
| 264.413232 | 264.4128688 | 264.4020528 | 264.398136 | 264.3905264 | 264.1244192 | 261.1368824 |
| 264.415232 | 264.4178688 | 264.4040528 | 264.405136 | 264.3945264 | 264.1244192 | 261.1388824 |
| 264.417232 | 264.4178688 | 264.4060528 | 264.407136 | 264.3975264 | 264.1294192 | 261.1388824 |
| 264.419232 | 264.4198688 | 264.4030528 | 264.407136 | 264.3975264 | 264.1304192 | 261.1378824 |
| 264.423232 | 264.4218688 | 264.4070528 | 264.410136 | 264.4025264 | 264.1344192 | 261.1388824 |
| 264.422232 | 264.4228688 | 264.4060528 | 264.413136 | 264.4045264 | 264.1354192 | 261.1368824 |
| 264.424232 | 264.4238688 | 264.4060528 | 264.413136 | 264.4025264 | 264.1384192 | 261.1388824 |
| 264.425232 | 264.4268688 | 264.4080528 | 264.414136 | 264.4055264 | 264.1404192 | 261.1388824 |
| 264.427232 | 264.4268688 | 264.4070528 | 264.416136 | 264.4075264 | 264.1414192 | 261.1388824 |
| 264.428232 | 264.4298688 | 264.4090528 | 264.419136 | 264.4095264 | 264.1434192 | 261.1388824 |
| 264.431232 | 264.4298688 | 264.4090528 | 264.418136 | 264.4095264 | 264.1454192 | 261.1388824 |
| 264.431232 | 264.4298688 | 264.4090528 | 264.419136 | 264.4095264 | 264.1454192 | 261.1368824 |
| 264.430232 | 264.4298688 | 264.4090528 | 264.419136 | 264.4095264 | 264.1464192 | 261.1388824 |
| 264.428232 | 264.4298688 | 264.4090528 | 264.417136 | 264.4095264 | 264.1464192 | 261.1388824 |
| 264.432232 | 264.4298688 | 264.4100528 | 264.419136 | 264.4085264 | 264.1464192 | 261.1418824 |
| 264.432232 | 264.4298688 | 264.4080528 | 264.419136 | 264.4105264 | 264.1444192 | 261.1418824 |
| 264.433232 | 264.4328688 | 264.4100528 | 264.422136 | 264.4115264 | 264.1444192 | 261.1428824 |
| 264.429232 | 264.4308688 | 264.4080528 | 264.419136 | 264.4085264 | 264.1444192 | 261.1408824 |
| 264.431232 | 264.4328688 | 264.4110528 | 264.421136 | 264.4115264 | 264.1434192 | 261.1458824 |
| 264.429232 | 264.4308688 | 264.4110528 | 264.420136 | 264.4115264 | 264.1454192 | 261.1458824 |
| 264.429232 | 264.4308688 | 264.4110528 | 264.418136 | 264.4115264 | 264.1434192 | 261.1468824 |
| 264.428232 | 264.4308688 | 264.4100528 | 264.418136 | 264.4105264 | 264.1424192 | 261.1488824 |
| 264.425232 | 264.4278688 | 264.4060528 | 264.415136 | 264.4045264 | 264.1394192 | 261.1458824 |
| 264.426232 | 264.4288688 | 264.4080528 | 264.414136 | 264.4055264 | 264.1404192 | 261.1518824 |
| 264.425232 | 264.4288688 | 264.4070528 | 264.415136 | 264.4035264 | 264.1394192 | 261.1488824 |
| 264.426232 | 264.4278688 | 264.4080528 | 264.414136 | 264.4035264 | 264.1354192 | 261.1518824 |
| 264.422232 | 264.4268688 | 264.4080528 | 264.414136 | 264.4055264 | 264.1404192 | 261.1528824 |
| 264.423232 | 264.4258688 | 264.4060528 | 264.414136 | 264.4045264 | 264.1384192 | 261.1508824 |
| 264.420232 | 264.4238688 | 264.4040528 | 264.409136 | 264.4035264 | 264.1334192 | 261.1518824 |
| 264.420232 | 264.4238688 | 264.4040528 | 264.411136 | 264.4035264 | 264.1324192 | 261.1508824 |
| 264.422232 | 264.4248688 | 264.4050528 | 264.412136 | 264.4035264 | 264.1354192 | 261.1518824 |
| 264.423232 | 264.4228688 | 264.4080528 | 264.413136 | 264.4055264 | 264.1344192 | 261.1528824 |
| 264.421232 | 264.4238688 | 264.4070528 | 264.412136 | 264.4025264 | 264.1334192 | 261.1548824 |
| 264.422232 | 264.4238688 | 264.4060528 | 264.409136 | 264.4045264 | 264.1334192 | 261.1508824 |
| 264.420232 | 264.4228688 | 264.4050528 | 264.409136 | 264.4005264 | 264.1314192 | 261.1528824 |
| 264.422232 | 264.4228688 | 264.4050528 | 264.409136 | 264.4005264 | 264.1314192 | 261.1528824 |
| 264.422232 | 264.4218688 | 264.4040528 | 264.410136 | 264.4005264 | 264.1324192 | 261.1538824 |
| 264.418232 | 264.4208688 | 264.4040528 | 264.409136 | 264.4005264 | 264.1304192 | 261.1528824 |
| 264.417232 | 264.4208688 | 264.4020528 | 264.409136 | 264.4005264 | 264.1304192 | 261.1538824 |
| 264.417232 | 264.4188688 | 264.4020528 | 264.409136 | 264.3985264 | 264.1304192 | 261.1538824 |
| 264.418232 | 264.4188688 | 264.4020528 | 264.407136 | 264.3985264 | 264.1304192 | 261.1538824 |
| 264.419232 | 264.4208688 | 264.4020528 | 264.410136 | 264.3995264 | 264.1334192 | 261.1538824 |

|            |             |             |            |             |             |             |
|------------|-------------|-------------|------------|-------------|-------------|-------------|
| 264.416232 | 264.4178688 | 264.4010528 | 264.406136 | 264.3965264 | 264.1304192 | 261.1508824 |
| 264.416232 | 264.4188688 | 264.4020528 | 264.407136 | 264.3985264 | 264.1284192 | 261.1558824 |
| 264.414232 | 264.4178688 | 264.4010528 | 264.404136 | 264.3965264 | 264.1304192 | 261.1528824 |
| 264.415232 | 264.4188688 | 264.4020528 | 264.405136 | 264.3985264 | 264.1284192 | 261.1538824 |
| 264.414232 | 264.4178688 | 264.3990528 | 264.402136 | 264.3955264 | 264.1294192 | 261.1528824 |
| 264.414232 | 264.4178688 | 264.4000528 | 264.404136 | 264.3985264 | 264.1264192 | 261.1518824 |
| 264.414232 | 264.4178688 | 264.4000528 | 264.402136 | 264.3945264 | 264.1264192 | 261.1538824 |
| 264.412232 | 264.4128688 | 264.3970528 | 264.399136 | 264.3935264 | 264.1234192 | 261.1508824 |
| 264.412232 | 264.4148688 | 264.3970528 | 264.401136 | 264.3935264 | 264.1254192 | 261.1508824 |
| 264.415232 | 264.4158688 | 264.3990528 | 264.402136 | 264.3935264 | 264.1264192 | 261.1518824 |
| 264.414232 | 264.4138688 | 264.3970528 | 264.404136 | 264.3935264 | 264.1234192 | 261.1518824 |
| 264.414232 | 264.4138688 | 264.3970528 | 264.404136 | 264.3945264 | 264.1264192 | 261.1518824 |
| 264.412232 | 264.4118688 | 264.3970528 | 264.401136 | 264.3935264 | 264.1274192 | 261.1528824 |
| 264.412232 | 264.4128688 | 264.3950528 | 264.401136 | 264.3935264 | 264.1254192 | 261.1508824 |
| 264.411232 | 264.4148688 | 264.3970528 | 264.401136 | 264.3935264 | 264.1274192 | 261.1508824 |
| 264.413232 | 264.4148688 | 264.3980528 | 264.401136 | 264.3925264 | 264.1264192 | 261.1508824 |
| 264.410232 | 264.4138688 | 264.3960528 | 264.400136 | 264.3925264 | 264.1234192 | 261.1498824 |
| 264.412232 | 264.4148688 | 264.3980528 | 264.401136 | 264.3925264 | 264.1264192 | 261.1518824 |
| 264.412232 | 264.4138688 | 264.3990528 | 264.400136 | 264.3915264 | 264.1254192 | 261.1518824 |
| 264.413232 | 264.4168688 | 264.3980528 | 264.403136 | 264.3965264 | 264.1264192 | 261.1528824 |
| 264.412232 | 264.4158688 | 264.3970528 | 264.403136 | 264.3935264 | 264.1234192 | 261.1508824 |
| 264.414232 | 264.4158688 | 264.3990528 | 264.405136 | 264.3935264 | 264.1274192 | 261.1538824 |
| 264.413232 | 264.4158688 | 264.3960528 | 264.402136 | 264.3925264 | 264.1264192 | 261.1488824 |
| 264.412232 | 264.4158688 | 264.3950528 | 264.402136 | 264.3925264 | 264.1264192 | 261.1508824 |
| 264.412232 | 264.4158688 | 264.3970528 | 264.404136 | 264.3945264 | 264.1254192 | 261.1508824 |
| 264.414232 | 264.4158688 | 264.3970528 | 264.403136 | 264.3965264 | 264.1274192 | 261.1498824 |
| 264.415232 | 264.4168688 | 264.3960528 | 264.406136 | 264.3955264 | 264.1284192 | 261.1498824 |
| 264.417232 | 264.4198688 | 264.3980528 | 264.407136 | 264.3975264 | 264.1314192 | 261.1498824 |
| 264.415232 | 264.4198688 | 264.3970528 | 264.407136 | 264.3995264 | 264.1324192 | 261.1518824 |
| 264.416232 | 264.4168688 | 264.3960528 | 264.407136 | 264.3965264 | 264.1314192 | 261.1508824 |
| 264.415232 | 264.4198688 | 264.3980528 | 264.404136 | 264.3965264 | 264.1314192 | 261.1488824 |
| 264.414232 | 264.4178688 | 264.3970528 | 264.405136 | 264.3965264 | 264.1304192 | 261.1478824 |
| 264.418232 | 264.4208688 | 264.3970528 | 264.408136 | 264.3985264 | 264.1304192 | 261.1478824 |
| 264.419232 | 264.4218688 | 264.3970528 | 264.411136 | 264.3985264 | 264.1344192 | 261.1498824 |
| 264.422232 | 264.4228688 | 264.3990528 | 264.410136 | 264.4005264 | 264.1364192 | 261.1498824 |
| 264.423232 | 264.4238688 | 264.3990528 | 264.413136 | 264.4045264 | 264.1384192 | 261.1518824 |
| 264.421232 | 264.4228688 | 264.3980528 | 264.412136 | 264.3995264 | 264.1354192 | 261.1478824 |
| 264.423232 | 264.4248688 | 264.3980528 | 264.413136 | 264.4035264 | 264.1374192 | 261.1508824 |
| 264.423232 | 264.4248688 | 264.4000528 | 264.412136 | 264.4035264 | 264.1404192 | 261.1488824 |
| 264.424232 | 264.4268688 | 264.4010528 | 264.414136 | 264.4035264 | 264.1384192 | 261.1498824 |
| 264.425232 | 264.4268688 | 264.4020528 | 264.414136 | 264.4055264 | 264.1404192 | 261.1508824 |
| 264.427232 | 264.4278688 | 264.4010528 | 264.417136 | 264.4075264 | 264.1404192 | 261.1508824 |
| 264.427232 | 264.4278688 | 264.4020528 | 264.417136 | 264.4075264 | 264.1424192 | 261.1508824 |
| 264.428232 | 264.4278688 | 264.4010528 | 264.417136 | 264.4075264 | 264.1424192 | 261.1498824 |
| 264.426232 | 264.4288688 | 264.4010528 | 264.415136 | 264.4065264 | 264.1394192 | 261.1498824 |
| 264.428232 | 264.4288688 | 264.4030528 | 264.416136 | 264.4095264 | 264.1394192 | 261.1518824 |
| 264.428232 | 264.4298688 | 264.4030528 | 264.418136 | 264.4085264 | 264.1414192 | 261.1498824 |

|            |             |             |            |             |             |             |
|------------|-------------|-------------|------------|-------------|-------------|-------------|
| 264.427232 | 264.4298688 | 264.4020528 | 264.416136 | 264.4065264 | 264.1414192 | 261.1518824 |
| 264.427232 | 264.4278688 | 264.4020528 | 264.415136 | 264.4085264 | 264.1424192 | 261.1518824 |
| 264.426232 | 264.4278688 | 264.4050528 | 264.415136 | 264.4075264 | 264.1404192 | 261.1508824 |
| 264.428232 | 264.4278688 | 264.4050528 | 264.415136 | 264.4065264 | 264.1394192 | 261.1528824 |
| 264.426232 | 264.4278688 | 264.4030528 | 264.415136 | 264.4075264 | 264.1414192 | 261.1538824 |
| 264.425232 | 264.4248688 | 264.4020528 | 264.412136 | 264.4055264 | 264.1384192 | 261.1548824 |
| 264.424232 | 264.4248688 | 264.4040528 | 264.414136 | 264.4035264 | 264.1364192 | 261.1548824 |
| 264.422232 | 264.4238688 | 264.4010528 | 264.409136 | 264.4005264 | 264.1354192 | 261.1528824 |
| 264.422232 | 264.4248688 | 264.4040528 | 264.411136 | 264.4035264 | 264.1354192 | 261.1568824 |
| 264.420232 | 264.4238688 | 264.4020528 | 264.408136 | 264.4005264 | 264.1334192 | 261.1548824 |
| 264.420232 | 264.4238688 | 264.4040528 | 264.408136 | 264.4015264 | 264.1334192 | 261.1568824 |
| 264.417232 | 264.4218688 | 264.4020528 | 264.408136 | 264.4005264 | 264.1334192 | 261.1568824 |
| 264.415232 | 264.4198688 | 264.4020528 | 264.406136 | 264.3985264 | 264.1304192 | 261.1568824 |
| 264.416232 | 264.4218688 | 264.4040528 | 264.404136 | 264.3985264 | 264.1314192 | 261.1578824 |
| 264.417232 | 264.4198688 | 264.4010528 | 264.405136 | 264.3965264 | 264.1304192 | 261.1598824 |
| 264.418232 | 264.4198688 | 264.4040528 | 264.404136 | 264.3985264 | 264.1294192 | 261.1608824 |
| 264.413232 | 264.4188688 | 264.4020528 | 264.401136 | 264.3955264 | 264.1264192 | 261.1598824 |
| 264.412232 | 264.4158688 | 264.4010528 | 264.400136 | 264.3925264 | 264.1254192 | 261.1598824 |
| 264.412232 | 264.4178688 | 264.4030528 | 264.400136 | 264.3905264 | 264.1254192 | 261.1588824 |
| 264.408232 | 264.4158688 | 264.4030528 | 264.399136 | 264.3905264 | 264.1254192 | 261.1588824 |
| 264.408232 | 264.4148688 | 264.4030528 | 264.399136 | 264.3885264 | 264.1254192 | 261.1568824 |
| 264.408232 | 264.4148688 | 264.4030528 | 264.397136 | 264.3885264 | 264.1214192 | 261.1588824 |
| 264.407232 | 264.4118688 | 264.4020528 | 264.394136 | 264.3865264 | 264.1184192 | 261.1578824 |
| 264.405232 | 264.4128688 | 264.4030528 | 264.396136 | 264.3855264 | 264.1204192 | 261.1568824 |
| 264.404232 | 264.4088688 | 264.3990528 | 264.391136 | 264.3825264 | 264.1184192 | 261.1578824 |
| 264.402232 | 264.4088688 | 264.4000528 | 264.391136 | 264.3825264 | 264.1184192 | 261.1558824 |
| 264.402232 | 264.4058688 | 264.3970528 | 264.389136 | 264.3815264 | 264.1154192 | 261.1558824 |
| 264.402232 | 264.4068688 | 264.4000528 | 264.391136 | 264.3805264 | 264.1144192 | 261.1558824 |
| 264.402232 | 264.4068688 | 264.4000528 | 264.387136 | 264.3805264 | 264.1144192 | 261.1568824 |
| 264.400232 | 264.4058688 | 264.4000528 | 264.388136 | 264.3795264 | 264.1134192 | 261.1558824 |
| 264.398232 | 264.4028688 | 264.3990528 | 264.386136 | 264.3775264 | 264.1134192 | 261.1528824 |
| 264.397232 | 264.4028688 | 264.3990528 | 264.386136 | 264.3775264 | 264.1124192 | 261.1528824 |
| 264.399232 | 264.4008688 | 264.3970528 | 264.385136 | 264.3775264 | 264.1104192 | 261.1508824 |
| 264.398232 | 264.4038688 | 264.3980528 | 264.386136 | 264.3785264 | 264.1134192 | 261.1538824 |
| 264.399232 | 264.4028688 | 264.3970528 | 264.386136 | 264.3765264 | 264.1104192 | 261.1508824 |
| 264.396232 | 264.3978688 | 264.3940528 | 264.382136 | 264.3715264 | 264.1054192 | 261.1488824 |
| 264.396232 | 264.3998688 | 264.3940528 | 264.383136 | 264.3745264 | 264.1084192 | 261.1478824 |
| 264.397232 | 264.4008688 | 264.3960528 | 264.383136 | 264.3725264 | 264.1074192 | 261.1498824 |
| 264.393232 | 264.3978688 | 264.3950528 | 264.382136 | 264.3735264 | 264.1074192 | 261.1488824 |
| 264.395232 | 264.3998688 | 264.3950528 | 264.384136 | 264.3735264 | 264.1074192 | 261.1488824 |
| 264.395232 | 264.3998688 | 264.3960528 | 264.382136 | 264.3715264 | 264.1064192 | 261.1488824 |
| 264.394232 | 264.3988688 | 264.3940528 | 264.381136 | 264.3705264 | 264.1064192 | 261.1458824 |
| 264.394232 | 264.3988688 | 264.3940528 | 264.381136 | 264.3725264 | 264.1104192 | 261.1458824 |
| 264.392232 | 264.3968688 | 264.3920528 | 264.380136 | 264.3715264 | 264.1034192 | 261.1458824 |
| 264.390232 | 264.3948688 | 264.3920528 | 264.379136 | 264.3685264 | 264.1034192 | 261.1418824 |
| 264.392232 | 264.3958688 | 264.3940528 | 264.380136 | 264.3685264 | 264.1074192 | 261.1418824 |
| 264.392232 | 264.3958688 | 264.3930528 | 264.380136 | 264.3705264 | 264.1064192 | 261.1438824 |



|            |             |             |            |             |             |             |
|------------|-------------|-------------|------------|-------------|-------------|-------------|
| 264.393232 | 264.3978688 | 264.3920528 | 264.380136 | 264.3725264 | 264.1064192 | 261.1438824 |
| 264.393232 | 264.3978688 | 264.3920528 | 264.380136 | 264.3735264 | 264.1084192 | 261.1418824 |
| 264.393232 | 264.3988688 | 264.3920528 | 264.379136 | 264.3725264 | 264.1064192 | 261.1388824 |
| 264.394232 | 264.3978688 | 264.3880528 | 264.380136 | 264.3745264 | 264.1074192 | 261.1388824 |
| 264.395232 | 264.4008688 | 264.3920528 | 264.383136 | 264.3735264 | 264.1104192 | 261.1408824 |
| 264.396232 | 264.3998688 | 264.3910528 | 264.384136 | 264.3765264 | 264.1114192 | 261.1378824 |
| 264.397232 | 264.3998688 | 264.3890528 | 264.386136 | 264.3765264 | 264.1134192 | 261.1358824 |
| 264.399232 | 264.4018688 | 264.3900528 | 264.390136 | 264.3795264 | 264.1144192 | 261.1368824 |
| 264.403232 | 264.4048688 | 264.3920528 | 264.393136 | 264.3825264 | 264.1184192 | 261.1348824 |
| 264.403232 | 264.4048688 | 264.3890528 | 264.393136 | 264.3845264 | 264.1214192 | 261.1348824 |
| 264.408232 | 264.4048688 | 264.3900528 | 264.395136 | 264.3855264 | 264.1234192 | 261.1348824 |
| 264.411232 | 264.4098688 | 264.3920528 | 264.398136 | 264.3875264 | 264.1254192 | 261.1358824 |
| 264.413232 | 264.4098688 | 264.3910528 | 264.400136 | 264.3905264 | 264.1274192 | 261.1358824 |
| 264.413232 | 264.4118688 | 264.3910528 | 264.402136 | 264.3915264 | 264.1334192 | 261.1328824 |
| 264.415232 | 264.4168688 | 264.3930528 | 264.405136 | 264.3935264 | 264.1334192 | 261.1378824 |
| 264.415232 | 264.4148688 | 264.3920528 | 264.403136 | 264.3955264 | 264.1324192 | 261.1348824 |
| 264.419232 | 264.4178688 | 264.3930528 | 264.407136 | 264.3985264 | 264.1374192 | 261.1338824 |
| 264.421232 | 264.4198688 | 264.3930528 | 264.408136 | 264.4005264 | 264.1374192 | 261.1348824 |
| 264.423232 | 264.4218688 | 264.3970528 | 264.412136 | 264.4025264 | 264.1414192 | 261.1378824 |
| 264.423232 | 264.4218688 | 264.3950528 | 264.410136 | 264.4025264 | 264.1414192 | 261.1348824 |
| 264.421232 | 264.4218688 | 264.3950528 | 264.409136 | 264.4025264 | 264.1414192 | 261.1348824 |
| 264.419232 | 264.4228688 | 264.3970528 | 264.412136 | 264.4025264 | 264.1424192 | 261.1358824 |
| 264.421232 | 264.4218688 | 264.3970528 | 264.410136 | 264.4015264 | 264.1414192 | 261.1348824 |
| 264.423232 | 264.4218688 | 264.3970528 | 264.412136 | 264.4015264 | 264.1394192 | 261.1358824 |
| 264.423232 | 264.4228688 | 264.3970528 | 264.412136 | 264.4025264 | 264.1414192 | 261.1388824 |
| 264.425232 | 264.4228688 | 264.3970528 | 264.413136 | 264.4045264 | 264.1394192 | 261.1398824 |
| 264.423232 | 264.4228688 | 264.3970528 | 264.410136 | 264.4025264 | 264.1394192 | 261.1398824 |
| 264.420232 | 264.4238688 | 264.3980528 | 264.410136 | 264.4015264 | 264.1404192 | 261.1378824 |
| 264.425232 | 264.4248688 | 264.3970528 | 264.410136 | 264.4045264 | 264.1414192 | 261.1398824 |
| 264.422232 | 264.4248688 | 264.3980528 | 264.412136 | 264.4035264 | 264.1404192 | 261.1418824 |
| 264.423232 | 264.4238688 | 264.3980528 | 264.410136 | 264.4045264 | 264.1364192 | 261.1428824 |
| 264.420232 | 264.4238688 | 264.3980528 | 264.409136 | 264.4015264 | 264.1364192 | 261.1428824 |
| 264.419232 | 264.4198688 | 264.3990528 | 264.409136 | 264.4015264 | 264.1374192 | 261.1458824 |
| 264.420232 | 264.4228688 | 264.3980528 | 264.410136 | 264.4025264 | 264.1374192 | 261.1468824 |
| 264.419232 | 264.4228688 | 264.3990528 | 264.409136 | 264.4015264 | 264.1384192 | 261.1468824 |
| 264.421232 | 264.4228688 | 264.3990528 | 264.409136 | 264.4015264 | 264.1374192 | 261.1518824 |
| 264.417232 | 264.4208688 | 264.3970528 | 264.406136 | 264.3995264 | 264.1344192 | 261.1498824 |
| 264.419232 | 264.4208688 | 264.3970528 | 264.407136 | 264.4005264 | 264.1334192 | 261.1498824 |
| 264.417232 | 264.4188688 | 264.3970528 | 264.404136 | 264.3975264 | 264.1324192 | 261.1518824 |
| 264.417232 | 264.4188688 | 264.3970528 | 264.404136 | 264.3975264 | 264.1314192 | 261.1508824 |
| 264.419232 | 264.4198688 | 264.3970528 | 264.408136 | 264.4015264 | 264.1324192 | 261.1518824 |
| 264.416232 | 264.4198688 | 264.3940528 | 264.404136 | 264.3985264 | 264.1324192 | 261.1518824 |
| 264.417232 | 264.4218688 | 264.3970528 | 264.407136 | 264.3995264 | 264.1324192 | 261.1518824 |
| 264.419232 | 264.4188688 | 264.3960528 | 264.403136 | 264.3985264 | 264.1324192 | 261.1518824 |
| 264.416232 | 264.4168688 | 264.3960528 | 264.405136 | 264.3965264 | 264.1324192 | 261.1518824 |
| 264.416232 | 264.4158688 | 264.3960528 | 264.405136 | 264.3985264 | 264.1284192 | 261.1538824 |
| 264.418232 | 264.4178688 | 264.3950528 | 264.403136 | 264.3975264 | 264.1294192 | 261.1518824 |

|            |             |             |            |             |             |             |
|------------|-------------|-------------|------------|-------------|-------------|-------------|
| 264.416232 | 264.4178688 | 264.3960528 | 264.406136 | 264.3975264 | 264.1294192 | 261.1528824 |
| 264.418232 | 264.4198688 | 264.3960528 | 264.404136 | 264.3985264 | 264.1294192 | 261.1528824 |
| 264.414232 | 264.4168688 | 264.3950528 | 264.403136 | 264.3975264 | 264.1274192 | 261.1548824 |
| 264.416232 | 264.4178688 | 264.3960528 | 264.404136 | 264.3985264 | 264.1294192 | 261.1548824 |
| 264.414232 | 264.4168688 | 264.3950528 | 264.403136 | 264.3955264 | 264.1314192 | 261.1528824 |
| 264.416232 | 264.4178688 | 264.3960528 | 264.402136 | 264.3965264 | 264.1274192 | 261.1508824 |
| 264.414232 | 264.4158688 | 264.3940528 | 264.402136 | 264.3955264 | 264.1294192 | 261.1508824 |
| 264.412232 | 264.4158688 | 264.3940528 | 264.401136 | 264.3955264 | 264.1294192 | 261.1508824 |
| 264.412232 | 264.4158688 | 264.3940528 | 264.401136 | 264.3965264 | 264.1294192 | 261.1508824 |
| 264.411232 | 264.4148688 | 264.3910528 | 264.398136 | 264.3925264 | 264.1274192 | 261.1498824 |
| 264.414232 | 264.4158688 | 264.3940528 | 264.401136 | 264.3955264 | 264.1264192 | 261.1508824 |
| 264.412232 | 264.4128688 | 264.3940528 | 264.399136 | 264.3955264 | 264.1284192 | 261.1528824 |
| 264.412232 | 264.4148688 | 264.3960528 | 264.399136 | 264.3935264 | 264.1264192 | 261.1538824 |
| 264.413232 | 264.4158688 | 264.3950528 | 264.400136 | 264.3945264 | 264.1284192 | 261.1538824 |
| 264.410232 | 264.4128688 | 264.3920528 | 264.398136 | 264.3905264 | 264.1234192 | 261.1508824 |
| 264.410232 | 264.4128688 | 264.3940528 | 264.399136 | 264.3915264 | 264.1264192 | 261.1528824 |
| 264.412232 | 264.4148688 | 264.3940528 | 264.399136 | 264.3915264 | 264.1234192 | 261.1508824 |
| 264.412232 | 264.4158688 | 264.3940528 | 264.401136 | 264.3935264 | 264.1244192 | 261.1528824 |
| 264.408232 | 264.4118688 | 264.3910528 | 264.398136 | 264.3905264 | 264.1234192 | 261.1498824 |
| 264.410232 | 264.4128688 | 264.3940528 | 264.401136 | 264.3915264 | 264.1244192 | 261.1508824 |
| 264.410232 | 264.4128688 | 264.3920528 | 264.401136 | 264.3915264 | 264.1234192 | 261.1508824 |
| 264.413232 | 264.4148688 | 264.3930528 | 264.402136 | 264.3925264 | 264.1264192 | 261.1518824 |
| 264.414232 | 264.4128688 | 264.3920528 | 264.399136 | 264.3925264 | 264.1244192 | 261.1508824 |
| 264.412232 | 264.4128688 | 264.3910528 | 264.399136 | 264.3895264 | 264.1234192 | 261.1498824 |
| 264.413232 | 264.4148688 | 264.3930528 | 264.402136 | 264.3945264 | 264.1264192 | 261.1518824 |
| 264.412232 | 264.4148688 | 264.3920528 | 264.399136 | 264.3915264 | 264.1244192 | 261.1488824 |
| 264.415232 | 264.4158688 | 264.3930528 | 264.402136 | 264.3925264 | 264.1294192 | 261.1518824 |
| 264.412232 | 264.4148688 | 264.3920528 | 264.401136 | 264.3915264 | 264.1264192 | 261.1508824 |
| 264.412232 | 264.4148688 | 264.3940528 | 264.401136 | 264.3925264 | 264.1284192 | 261.1508824 |
| 264.415232 | 264.4158688 | 264.3930528 | 264.404136 | 264.3955264 | 264.1284192 | 261.1508824 |
| 264.417232 | 264.4178688 | 264.3930528 | 264.402136 | 264.3945264 | 264.1264192 | 261.1508824 |
| 264.416232 | 264.4188688 | 264.3950528 | 264.407136 | 264.3975264 | 264.1294192 | 261.1508824 |
| 264.416232 | 264.4188688 | 264.3960528 | 264.407136 | 264.3975264 | 264.1314192 | 261.1508824 |
| 264.416232 | 264.4178688 | 264.3950528 | 264.405136 | 264.3955264 | 264.1314192 | 261.1488824 |
| 264.418232 | 264.4188688 | 264.3940528 | 264.406136 | 264.3975264 | 264.1324192 | 261.1508824 |
| 264.416232 | 264.4178688 | 264.3950528 | 264.405136 | 264.3955264 | 264.1294192 | 261.1508824 |
| 264.416232 | 264.4178688 | 264.3950528 | 264.405136 | 264.3955264 | 264.1314192 | 261.1508824 |
| 264.418232 | 264.4188688 | 264.3960528 | 264.405136 | 264.3975264 | 264.1334192 | 261.1488824 |
| 264.418232 | 264.4168688 | 264.3960528 | 264.406136 | 264.3985264 | 264.1304192 | 261.1518824 |
| 264.421232 | 264.4198688 | 264.3990528 | 264.408136 | 264.4005264 | 264.1354192 | 261.1518824 |
| 264.419232 | 264.4188688 | 264.3980528 | 264.406136 | 264.3985264 | 264.1324192 | 261.1508824 |
| 264.419232 | 264.4218688 | 264.3960528 | 264.406136 | 264.3985264 | 264.1324192 | 261.1518824 |
| 264.421232 | 264.4218688 | 264.3990528 | 264.408136 | 264.4005264 | 264.1344192 | 261.1528824 |
| 264.419232 | 264.4218688 | 264.3960528 | 264.408136 | 264.4005264 | 264.1304192 | 261.1518824 |
| 264.416232 | 264.4178688 | 264.3960528 | 264.405136 | 264.3975264 | 264.1294192 | 261.1508824 |
| 264.418232 | 264.4218688 | 264.3960528 | 264.406136 | 264.3985264 | 264.1324192 | 261.1508824 |
| 264.418232 | 264.4208688 | 264.3960528 | 264.405136 | 264.3975264 | 264.1304192 | 261.1508824 |

|            |             |             |            |             |             |             |
|------------|-------------|-------------|------------|-------------|-------------|-------------|
| 264.419232 | 264.4198688 | 264.3970528 | 264.406136 | 264.3985264 | 264.1304192 | 261.1518824 |
| 264.417232 | 264.4198688 | 264.3970528 | 264.405136 | 264.3965264 | 264.1304192 | 261.1518824 |
| 264.417232 | 264.4198688 | 264.3970528 | 264.406136 | 264.3985264 | 264.1284192 | 261.1518824 |
| 264.414232 | 264.4168688 | 264.3960528 | 264.403136 | 264.3955264 | 264.1294192 | 261.1508824 |
| 264.417232 | 264.4218688 | 264.3990528 | 264.406136 | 264.3985264 | 264.1304192 | 261.1528824 |
| 264.415232 | 264.4188688 | 264.3990528 | 264.403136 | 264.3965264 | 264.1284192 | 261.1518824 |
| 264.417232 | 264.4198688 | 264.3990528 | 264.404136 | 264.3975264 | 264.1294192 | 261.1528824 |
| 264.414232 | 264.4178688 | 264.3980528 | 264.403136 | 264.3955264 | 264.1294192 | 261.1508824 |
| 264.415232 | 264.4188688 | 264.3990528 | 264.403136 | 264.3955264 | 264.1284192 | 261.1558824 |
| 264.413232 | 264.4178688 | 264.3970528 | 264.403136 | 264.3955264 | 264.1304192 | 261.1518824 |
| 264.413232 | 264.4158688 | 264.3990528 | 264.400136 | 264.3935264 | 264.1264192 | 261.1538824 |
| 264.414232 | 264.4188688 | 264.3990528 | 264.401136 | 264.3945264 | 264.1274192 | 261.1528824 |
| 264.412232 | 264.4168688 | 264.4000528 | 264.399136 | 264.3905264 | 264.1274192 | 261.1528824 |
| 264.412232 | 264.4158688 | 264.3960528 | 264.399136 | 264.3925264 | 264.1234192 | 261.1528824 |
| 264.408232 | 264.4128688 | 264.3960528 | 264.398136 | 264.3895264 | 264.1254192 | 261.1528824 |
| 264.411232 | 264.4138688 | 264.3990528 | 264.397136 | 264.3905264 | 264.1244192 | 261.1538824 |
| 264.410232 | 264.4138688 | 264.3980528 | 264.397136 | 264.3905264 | 264.1234192 | 261.1548824 |
| 264.405232 | 264.4108688 | 264.3960528 | 264.393136 | 264.3875264 | 264.1214192 | 261.1518824 |
| 264.406232 | 264.4088688 | 264.3980528 | 264.392136 | 264.3875264 | 264.1234192 | 261.1528824 |
| 264.406232 | 264.4108688 | 264.3990528 | 264.394136 | 264.3865264 | 264.1224192 | 261.1538824 |
| 264.406232 | 264.4108688 | 264.3970528 | 264.392136 | 264.3865264 | 264.1224192 | 261.1538824 |
| 264.404232 | 264.4108688 | 264.3940528 | 264.392136 | 264.3845264 | 264.1204192 | 261.1538824 |
| 264.402232 | 264.4088688 | 264.3970528 | 264.392136 | 264.3845264 | 264.1194192 | 261.1538824 |
| 264.400232 | 264.4058688 | 264.3920528 | 264.389136 | 264.3835264 | 264.1154192 | 261.1508824 |
| 264.402232 | 264.4068688 | 264.3950528 | 264.390136 | 264.3825264 | 264.1164192 | 261.1558824 |
| 264.402232 | 264.4038688 | 264.3950528 | 264.389136 | 264.3815264 | 264.1164192 | 261.1538824 |
| 264.401232 | 264.4038688 | 264.3930528 | 264.389136 | 264.3795264 | 264.1164192 | 261.1538824 |
| 264.401232 | 264.4058688 | 264.3940528 | 264.388136 | 264.3805264 | 264.1164192 | 261.1538824 |
| 264.400232 | 264.4048688 | 264.3960528 | 264.388136 | 264.3805264 | 264.1154192 | 261.1518824 |
| 264.395232 | 264.4008688 | 264.3930528 | 264.385136 | 264.3755264 | 264.1124192 | 261.1488824 |
| 264.398232 | 264.4018688 | 264.3920528 | 264.386136 | 264.3795264 | 264.1154192 | 261.1528824 |
| 264.398232 | 264.4018688 | 264.3930528 | 264.386136 | 264.3785264 | 264.1134192 | 261.1528824 |
| 264.396232 | 264.3998688 | 264.3940528 | 264.383136 | 264.3745264 | 264.1114192 | 261.1478824 |
| 264.394232 | 264.3988688 | 264.3920528 | 264.381136 | 264.3745264 | 264.1114192 | 261.1518824 |
| 264.395232 | 264.3998688 | 264.3910528 | 264.383136 | 264.3745264 | 264.1104192 | 261.1498824 |
| 264.394232 | 264.3988688 | 264.3910528 | 264.381136 | 264.3745264 | 264.1104192 | 261.1498824 |
| 264.392232 | 264.3968688 | 264.3910528 | 264.379136 | 264.3725264 | 264.1094192 | 261.1478824 |
| 264.391232 | 264.3978688 | 264.3870528 | 264.381136 | 264.3725264 | 264.1104192 | 261.1478824 |
| 264.391232 | 264.3968688 | 264.3890528 | 264.379136 | 264.3705264 | 264.1084192 | 261.1448824 |
| 264.390232 | 264.3948688 | 264.3870528 | 264.378136 | 264.3685264 | 264.1064192 | 261.1458824 |
| 264.392232 | 264.3978688 | 264.3900528 | 264.380136 | 264.3735264 | 264.1074192 | 261.1468824 |
| 264.391232 | 264.3968688 | 264.3890528 | 264.379136 | 264.3705264 | 264.1084192 | 261.1458824 |
| 264.390232 | 264.3948688 | 264.3870528 | 264.378136 | 264.3685264 | 264.1034192 | 261.1448824 |
| 264.389232 | 264.3948688 | 264.3870528 | 264.376136 | 264.3685264 | 264.1064192 | 261.1458824 |
| 264.389232 | 264.3928688 | 264.3880528 | 264.377136 | 264.3685264 | 264.1024192 | 261.1438824 |
| 264.389232 | 264.3928688 | 264.3880528 | 264.377136 | 264.3685264 | 264.1044192 | 261.1438824 |
| 264.387232 | 264.3948688 | 264.3870528 | 264.375136 | 264.3665264 | 264.1064192 | 261.1408824 |

|            |             |             |            |             |             |             |
|------------|-------------|-------------|------------|-------------|-------------|-------------|
| 264.389232 | 264.3928688 | 264.3870528 | 264.375136 | 264.3685264 | 264.1044192 | 261.1428824 |
| 264.389232 | 264.3928688 | 264.3850528 | 264.375136 | 264.3665264 | 264.1044192 | 261.1408824 |
| 264.389232 | 264.3928688 | 264.3870528 | 264.375136 | 264.3685264 | 264.1024192 | 261.1388824 |
| 264.388232 | 264.3918688 | 264.3850528 | 264.374136 | 264.3655264 | 264.1024192 | 261.1358824 |
| 264.388232 | 264.3918688 | 264.3850528 | 264.374136 | 264.3655264 | 264.1044192 | 261.1358824 |
| 264.389232 | 264.3928688 | 264.3880528 | 264.377136 | 264.3695264 | 264.1074192 | 261.1408824 |
| 264.387232 | 264.3918688 | 264.3850528 | 264.375136 | 264.3665264 | 264.1064192 | 261.1358824 |
| 264.387232 | 264.3918688 | 264.3850528 | 264.374136 | 264.3645264 | 264.1044192 | 261.1358824 |
| 264.389232 | 264.3928688 | 264.3860528 | 264.375136 | 264.3665264 | 264.1034192 | 261.1368824 |
| 264.390232 | 264.3948688 | 264.3880528 | 264.377136 | 264.3715264 | 264.1084192 | 261.1388824 |
| 264.390232 | 264.3928688 | 264.3860528 | 264.378136 | 264.3715264 | 264.1084192 | 261.1368824 |
| 264.390232 | 264.3958688 | 264.3860528 | 264.378136 | 264.3695264 | 264.1084192 | 261.1358824 |
| 264.394232 | 264.3978688 | 264.3860528 | 264.380136 | 264.3715264 | 264.1084192 | 261.1358824 |
| 264.395232 | 264.3978688 | 264.3860528 | 264.382136 | 264.3715264 | 264.1144192 | 261.1338824 |
| 264.394232 | 264.3958688 | 264.3840528 | 264.382136 | 264.3725264 | 264.1124192 | 261.1328824 |
| 264.397232 | 264.3988688 | 264.3860528 | 264.385136 | 264.3745264 | 264.1144192 | 261.1338824 |
| 264.397232 | 264.3988688 | 264.3860528 | 264.385136 | 264.3765264 | 264.1154192 | 261.1308824 |
| 264.398232 | 264.3998688 | 264.3870528 | 264.384136 | 264.3775264 | 264.1174192 | 261.1318824 |
| 264.400232 | 264.4018688 | 264.3870528 | 264.388136 | 264.3795264 | 264.1194192 | 261.1308824 |
| 264.400232 | 264.4018688 | 264.3870528 | 264.388136 | 264.3805264 | 264.1224192 | 261.1318824 |
| 264.403232 | 264.4048688 | 264.3870528 | 264.391136 | 264.3825264 | 264.1224192 | 261.1318824 |
| 264.405232 | 264.4068688 | 264.3860528 | 264.392136 | 264.3855264 | 264.1254192 | 261.1318824 |
| 264.408232 | 264.4088688 | 264.3900528 | 264.397136 | 264.3865264 | 264.1264192 | 261.1328824 |
| 264.411232 | 264.4108688 | 264.3900528 | 264.398136 | 264.3915264 | 264.1304192 | 261.1328824 |
| 264.411232 | 264.4108688 | 264.3890528 | 264.400136 | 264.3915264 | 264.1314192 | 261.1328824 |
| 264.415232 | 264.4118688 | 264.3890528 | 264.401136 | 264.3925264 | 264.1334192 | 261.1328824 |
| 264.413232 | 264.4138688 | 264.3890528 | 264.401136 | 264.3925264 | 264.1334192 | 261.1308824 |
| 264.417232 | 264.4148688 | 264.3870528 | 264.403136 | 264.3925264 | 264.1354192 | 261.1298824 |
| 264.417232 | 264.4168688 | 264.3900528 | 264.406136 | 264.3975264 | 264.1384192 | 261.1318824 |
| 264.420232 | 264.4178688 | 264.3910528 | 264.409136 | 264.3985264 | 264.1394192 | 261.1308824 |
| 264.421232 | 264.4178688 | 264.3900528 | 264.407136 | 264.3985264 | 264.1374192 | 261.1308824 |
| 264.422232 | 264.4208688 | 264.3920528 | 264.410136 | 264.4025264 | 264.1434192 | 261.1308824 |
| 264.424232 | 264.4228688 | 264.3930528 | 264.410136 | 264.4025264 | 264.1424192 | 261.1318824 |
| 264.425232 | 264.4238688 | 264.3910528 | 264.412136 | 264.4055264 | 264.1454192 | 261.1318824 |
| 264.423232 | 264.4218688 | 264.3930528 | 264.412136 | 264.4055264 | 264.1454192 | 261.1348824 |
| 264.426232 | 264.4228688 | 264.3930528 | 264.413136 | 264.4075264 | 264.1464192 | 261.1338824 |
| 264.427232 | 264.4248688 | 264.3930528 | 264.416136 | 264.4065264 | 264.1454192 | 261.1368824 |
| 264.428232 | 264.4268688 | 264.3950528 | 264.416136 | 264.4075264 | 264.1484192 | 261.1378824 |
| 264.428232 | 264.4258688 | 264.3970528 | 264.419136 | 264.4075264 | 264.1484192 | 261.1388824 |
| 264.430232 | 264.4308688 | 264.3940528 | 264.417136 | 264.4105264 | 264.1494192 | 261.1398824 |
| 264.430232 | 264.4278688 | 264.3970528 | 264.420136 | 264.4115264 | 264.1504192 | 261.1418824 |
| 264.428232 | 264.4258688 | 264.3950528 | 264.418136 | 264.4115264 | 264.1484192 | 261.1418824 |
| 264.431232 | 264.4298688 | 264.3970528 | 264.416136 | 264.4115264 | 264.1484192 | 261.1448824 |
| 264.426232 | 264.4278688 | 264.3970528 | 264.416136 | 264.4095264 | 264.1484192 | 261.1448824 |
| 264.430232 | 264.4298688 | 264.4000528 | 264.419136 | 264.4105264 | 264.1474192 | 261.1468824 |
| 264.429232 | 264.4288688 | 264.3960528 | 264.416136 | 264.4095264 | 264.1454192 | 261.1458824 |
| 264.429232 | 264.4268688 | 264.3960528 | 264.416136 | 264.4095264 | 264.1454192 | 261.1458824 |

|            |             |             |            |             |             |             |
|------------|-------------|-------------|------------|-------------|-------------|-------------|
| 264.428232 | 264.4278688 | 264.3980528 | 264.416136 | 264.4105264 | 264.1454192 | 261.1508824 |
| 264.427232 | 264.4248688 | 264.3960528 | 264.416136 | 264.4075264 | 264.1474192 | 261.1488824 |
| 264.428232 | 264.4278688 | 264.3990528 | 264.415136 | 264.4085264 | 264.1444192 | 261.1518824 |
| 264.428232 | 264.4298688 | 264.3970528 | 264.415136 | 264.4085264 | 264.1444192 | 261.1498824 |
| 264.426232 | 264.4248688 | 264.3970528 | 264.412136 | 264.4085264 | 264.1434192 | 261.1518824 |
| 264.424232 | 264.4248688 | 264.3970528 | 264.412136 | 264.4065264 | 264.1434192 | 261.1518824 |
| 264.421232 | 264.4238688 | 264.3960528 | 264.413136 | 264.4055264 | 264.1414192 | 261.1508824 |
| 264.426232 | 264.4248688 | 264.3960528 | 264.414136 | 264.4085264 | 264.1394192 | 261.1518824 |
| 264.424232 | 264.4248688 | 264.3970528 | 264.414136 | 264.4065264 | 264.1414192 | 261.1538824 |
| 264.423232 | 264.4238688 | 264.3960528 | 264.413136 | 264.4055264 | 264.1384192 | 261.1518824 |
| 264.423232 | 264.4268688 | 264.3990528 | 264.412136 | 264.4065264 | 264.1414192 | 261.1538824 |
| 264.424232 | 264.4238688 | 264.3970528 | 264.412136 | 264.4065264 | 264.1384192 | 261.1568824 |
| 264.426232 | 264.4268688 | 264.4010528 | 264.414136 | 264.4085264 | 264.1414192 | 261.1578824 |
| 264.424232 | 264.4228688 | 264.3980528 | 264.411136 | 264.4055264 | 264.1394192 | 261.1558824 |
| 264.420232 | 264.4228688 | 264.3970528 | 264.410136 | 264.4045264 | 264.1354192 | 261.1538824 |
| 264.422232 | 264.4238688 | 264.3970528 | 264.410136 | 264.4045264 | 264.1374192 | 261.1558824 |
| 264.419232 | 264.4208688 | 264.3940528 | 264.409136 | 264.4035264 | 264.1344192 | 261.1558824 |
| 264.420232 | 264.4198688 | 264.3950528 | 264.408136 | 264.4025264 | 264.1354192 | 261.1548824 |
| 264.419232 | 264.4228688 | 264.3940528 | 264.409136 | 264.4015264 | 264.1364192 | 261.1558824 |
| 264.421232 | 264.4238688 | 264.3970528 | 264.410136 | 264.4035264 | 264.1364192 | 261.1578824 |
| 264.423232 | 264.4208688 | 264.3970528 | 264.410136 | 264.4035264 | 264.1344192 | 261.1588824 |
| 264.418232 | 264.4198688 | 264.3950528 | 264.406136 | 264.4005264 | 264.1314192 | 261.1548824 |
| 264.419232 | 264.4198688 | 264.3980528 | 264.407136 | 264.4015264 | 264.1344192 | 261.1578824 |
| 264.417232 | 264.4188688 | 264.3950528 | 264.406136 | 264.3985264 | 264.1334192 | 261.1568824 |
| 264.418232 | 264.4188688 | 264.3970528 | 264.406136 | 264.3985264 | 264.1334192 | 261.1568824 |
| 264.418232 | 264.4188688 | 264.3970528 | 264.406136 | 264.4005264 | 264.1334192 | 261.1578824 |
| 264.417232 | 264.4188688 | 264.3970528 | 264.408136 | 264.4025264 | 264.1324192 | 261.1568824 |
| 264.420232 | 264.4218688 | 264.3960528 | 264.409136 | 264.4025264 | 264.1334192 | 261.1568824 |
| 264.419232 | 264.4188688 | 264.3970528 | 264.406136 | 264.4005264 | 264.1304192 | 261.1558824 |
| 264.419232 | 264.4178688 | 264.3960528 | 264.405136 | 264.3995264 | 264.1314192 | 261.1568824 |
| 264.418232 | 264.4188688 | 264.3970528 | 264.405136 | 264.3995264 | 264.1314192 | 261.1558824 |
| 264.418232 | 264.4188688 | 264.3980528 | 264.407136 | 264.3995264 | 264.1334192 | 261.1558824 |
| 264.415232 | 264.4158688 | 264.3950528 | 264.404136 | 264.3965264 | 264.1314192 | 261.1558824 |
| 264.421232 | 264.4218688 | 264.3990528 | 264.408136 | 264.4015264 | 264.1324192 | 261.1588824 |
| 264.418232 | 264.4188688 | 264.3960528 | 264.405136 | 264.3985264 | 264.1304192 | 261.1558824 |
| 264.419232 | 264.4178688 | 264.3950528 | 264.406136 | 264.3985264 | 264.1304192 | 261.1548824 |
| 264.417232 | 264.4198688 | 264.3950528 | 264.406136 | 264.3985264 | 264.1304192 | 261.1558824 |
| 264.418232 | 264.4208688 | 264.3960528 | 264.407136 | 264.4005264 | 264.1334192 | 261.1558824 |
| 264.419232 | 264.4198688 | 264.3970528 | 264.407136 | 264.4005264 | 264.1344192 | 261.1558824 |
| 264.420232 | 264.4198688 | 264.3970528 | 264.407136 | 264.4005264 | 264.1344192 | 261.1548824 |
| 264.417232 | 264.4198688 | 264.3950528 | 264.404136 | 264.3985264 | 264.1324192 | 261.1548824 |
| 264.419232 | 264.4198688 | 264.3950528 | 264.407136 | 264.3985264 | 264.1324192 | 261.1548824 |
| 264.420232 | 264.4228688 | 264.3980528 | 264.409136 | 264.4015264 | 264.1334192 | 261.1538824 |
| 264.422232 | 264.4228688 | 264.4000528 | 264.410136 | 264.4015264 | 264.1354192 | 261.1578824 |
| 264.420232 | 264.4228688 | 264.4000528 | 264.411136 | 264.4025264 | 264.1344192 | 261.1558824 |
| 264.421232 | 264.4208688 | 264.4010528 | 264.409136 | 264.4005264 | 264.1344192 | 261.1568824 |
| 264.421232 | 264.4228688 | 264.3990528 | 264.411136 | 264.4005264 | 264.1324192 | 261.1548824 |

|            |             |             |            |             |             |             |
|------------|-------------|-------------|------------|-------------|-------------|-------------|
| 264.423232 | 264.4228688 | 264.4010528 | 264.409136 | 264.3995264 | 264.1344192 | 261.1548824 |
| 264.417232 | 264.4198688 | 264.3980528 | 264.408136 | 264.4005264 | 264.1304192 | 261.1538824 |
| 264.422232 | 264.4218688 | 264.3980528 | 264.410136 | 264.3995264 | 264.1334192 | 261.1558824 |
| 264.418232 | 264.4188688 | 264.3980528 | 264.405136 | 264.3985264 | 264.1324192 | 261.1538824 |
| 264.417232 | 264.4198688 | 264.3960528 | 264.405136 | 264.3985264 | 264.1314192 | 261.1558824 |
| 264.420232 | 264.4218688 | 264.4000528 | 264.406136 | 264.3995264 | 264.1314192 | 261.1558824 |
| 264.420232 | 264.4198688 | 264.3980528 | 264.408136 | 264.3985264 | 264.1314192 | 261.1558824 |
| 264.416232 | 264.4198688 | 264.3980528 | 264.406136 | 264.3985264 | 264.1284192 | 261.1558824 |
| 264.418232 | 264.4198688 | 264.3980528 | 264.406136 | 264.3985264 | 264.1324192 | 261.1538824 |
| 264.417232 | 264.4188688 | 264.4000528 | 264.405136 | 264.3985264 | 264.1304192 | 261.1538824 |
| 264.420232 | 264.4198688 | 264.4010528 | 264.408136 | 264.3995264 | 264.1334192 | 261.1568824 |
| 264.417232 | 264.4188688 | 264.3980528 | 264.403136 | 264.3965264 | 264.1304192 | 261.1558824 |
| 264.416232 | 264.4198688 | 264.4000528 | 264.406136 | 264.3995264 | 264.1314192 | 261.1558824 |
| 264.417232 | 264.4188688 | 264.4000528 | 264.405136 | 264.3965264 | 264.1284192 | 261.1538824 |
| 264.416232 | 264.4168688 | 264.4000528 | 264.403136 | 264.3965264 | 264.1314192 | 261.1558824 |
| 264.416232 | 264.4188688 | 264.4000528 | 264.401136 | 264.3965264 | 264.1294192 | 261.1558824 |
| 264.414232 | 264.4168688 | 264.4000528 | 264.401136 | 264.3925264 | 264.1294192 | 261.1558824 |
| 264.413232 | 264.4168688 | 264.3980528 | 264.400136 | 264.3925264 | 264.1274192 | 261.1538824 |
| 264.412232 | 264.4168688 | 264.4000528 | 264.401136 | 264.3915264 | 264.1284192 | 261.1548824 |
| 264.412232 | 264.4168688 | 264.3990528 | 264.399136 | 264.3925264 | 264.1274192 | 261.1568824 |
| 264.414232 | 264.4168688 | 264.4000528 | 264.399136 | 264.3935264 | 264.1284192 | 261.1568824 |
| 264.413232 | 264.4148688 | 264.4000528 | 264.398136 | 264.3925264 | 264.1264192 | 261.1558824 |
| 264.410232 | 264.4148688 | 264.4010528 | 264.399136 | 264.3925264 | 264.1274192 | 261.1568824 |
| 264.408232 | 264.4118688 | 264.3990528 | 264.394136 | 264.3875264 | 264.1254192 | 261.1538824 |
| 264.408232 | 264.4138688 | 264.3990528 | 264.394136 | 264.3885264 | 264.1214192 | 261.1528824 |
| 264.408232 | 264.4118688 | 264.3980528 | 264.394136 | 264.3885264 | 264.1234192 | 261.1528824 |
| 264.407232 | 264.4118688 | 264.3980528 | 264.395136 | 264.3875264 | 264.1204192 | 261.1538824 |
| 264.407232 | 264.4108688 | 264.3990528 | 264.392136 | 264.3855264 | 264.1224192 | 261.1538824 |
| 264.403232 | 264.4098688 | 264.3980528 | 264.390136 | 264.3845264 | 264.1204192 | 261.1528824 |
| 264.403232 | 264.4098688 | 264.3970528 | 264.392136 | 264.3835264 | 264.1204192 | 261.1558824 |
| 264.403232 | 264.4078688 | 264.3990528 | 264.390136 | 264.3815264 | 264.1194192 | 261.1518824 |
| 264.400232 | 264.4058688 | 264.3970528 | 264.390136 | 264.3815264 | 264.1214192 | 261.1548824 |
| 264.402232 | 264.4058688 | 264.3960528 | 264.389136 | 264.3815264 | 264.1164192 | 261.1518824 |
| 264.401232 | 264.4058688 | 264.3980528 | 264.389136 | 264.3805264 | 264.1164192 | 261.1528824 |
| 264.399232 | 264.4038688 | 264.3970528 | 264.387136 | 264.3785264 | 264.1164192 | 261.1528824 |
| 264.400232 | 264.4068688 | 264.3980528 | 264.387136 | 264.3795264 | 264.1174192 | 261.1538824 |
| 264.398232 | 264.4038688 | 264.3960528 | 264.387136 | 264.3795264 | 264.1154192 | 261.1528824 |
| 264.396232 | 264.4018688 | 264.3960528 | 264.384136 | 264.3765264 | 264.1134192 | 261.1508824 |
| 264.399232 | 264.4028688 | 264.3960528 | 264.385136 | 264.3795264 | 264.1144192 | 261.1518824 |
| 264.396232 | 264.3998688 | 264.3940528 | 264.381136 | 264.3745264 | 264.1114192 | 261.1488824 |
| 264.394232 | 264.3998688 | 264.3940528 | 264.383136 | 264.3725264 | 264.1114192 | 261.1468824 |
| 264.396232 | 264.3988688 | 264.3960528 | 264.381136 | 264.3745264 | 264.1124192 | 261.1468824 |
| 264.393232 | 264.3998688 | 264.3940528 | 264.381136 | 264.3735264 | 264.1104192 | 261.1488824 |
| 264.398232 | 264.4028688 | 264.3960528 | 264.382136 | 264.3745264 | 264.1114192 | 261.1478824 |
| 264.391232 | 264.3978688 | 264.3920528 | 264.379136 | 264.3705264 | 264.1064192 | 261.1448824 |
| 264.395232 | 264.4008688 | 264.3960528 | 264.382136 | 264.3725264 | 264.1104192 | 261.1488824 |
| 264.392232 | 264.3978688 | 264.3940528 | 264.382136 | 264.3695264 | 264.1074192 | 261.1458824 |

|            |             |             |            |             |             |             |
|------------|-------------|-------------|------------|-------------|-------------|-------------|
| 264.390232 | 264.3978688 | 264.3920528 | 264.380136 | 264.3695264 | 264.1074192 | 261.1458824 |
| 264.390232 | 264.3948688 | 264.3890528 | 264.377136 | 264.3695264 | 264.1094192 | 261.1428824 |
| 264.391232 | 264.3968688 | 264.3930528 | 264.380136 | 264.3705264 | 264.1074192 | 261.1458824 |
| 264.391232 | 264.3938688 | 264.3910528 | 264.378136 | 264.3685264 | 264.1084192 | 261.1418824 |
| 264.390232 | 264.3958688 | 264.3890528 | 264.378136 | 264.3675264 | 264.1074192 | 261.1438824 |
| 264.392232 | 264.3958688 | 264.3910528 | 264.378136 | 264.3695264 | 264.1074192 | 261.1438824 |
| 264.390232 | 264.3958688 | 264.3910528 | 264.376136 | 264.3695264 | 264.1074192 | 261.1438824 |
| 264.391232 | 264.3948688 | 264.3920528 | 264.379136 | 264.3715264 | 264.1084192 | 261.1428824 |
| 264.391232 | 264.3968688 | 264.3900528 | 264.379136 | 264.3695264 | 264.1084192 | 261.1418824 |
| 264.389232 | 264.3948688 | 264.3900528 | 264.376136 | 264.3675264 | 264.1064192 | 261.1418824 |
| 264.389232 | 264.3948688 | 264.3880528 | 264.376136 | 264.3675264 | 264.1084192 | 261.1398824 |
| 264.390232 | 264.3938688 | 264.3890528 | 264.375136 | 264.3675264 | 264.1054192 | 261.1388824 |
| 264.388232 | 264.3938688 | 264.3850528 | 264.375136 | 264.3665264 | 264.1094192 | 261.1368824 |
| 264.389232 | 264.3938688 | 264.3870528 | 264.376136 | 264.3695264 | 264.1084192 | 261.1388824 |
| 264.390232 | 264.3948688 | 264.3880528 | 264.377136 | 264.3685264 | 264.1094192 | 261.1378824 |
| 264.392232 | 264.3948688 | 264.3860528 | 264.375136 | 264.3705264 | 264.1114192 | 261.1378824 |
| 264.388232 | 264.3938688 | 264.3850528 | 264.374136 | 264.3655264 | 264.1084192 | 261.1348824 |
| 264.389232 | 264.3948688 | 264.3870528 | 264.376136 | 264.3695264 | 264.1104192 | 261.1368824 |
| 264.394232 | 264.3968688 | 264.3860528 | 264.381136 | 264.3725264 | 264.1134192 | 261.1348824 |
| 264.394232 | 264.3968688 | 264.3880528 | 264.380136 | 264.3725264 | 264.1114192 | 261.1348824 |
| 264.394232 | 264.3958688 | 264.3870528 | 264.382136 | 264.3735264 | 264.1124192 | 261.1378824 |
| 264.396232 | 264.4008688 | 264.3900528 | 264.386136 | 264.3775264 | 264.1174192 | 261.1388824 |
| 264.398232 | 264.3988688 | 264.3870528 | 264.383136 | 264.3765264 | 264.1154192 | 261.1328824 |
| 264.399232 | 264.4008688 | 264.3870528 | 264.387136 | 264.3765264 | 264.1184192 | 261.1348824 |
| 264.402232 | 264.4038688 | 264.3890528 | 264.390136 | 264.3795264 | 264.1194192 | 261.1378824 |
| 264.401232 | 264.4008688 | 264.3860528 | 264.387136 | 264.3785264 | 264.1204192 | 261.1328824 |
| 264.403232 | 264.4028688 | 264.3870528 | 264.390136 | 264.3825264 | 264.1214192 | 261.1328824 |
| 264.403232 | 264.4058688 | 264.3860528 | 264.393136 | 264.3835264 | 264.1234192 | 261.1328824 |
| 264.406232 | 264.4058688 | 264.3870528 | 264.393136 | 264.3855264 | 264.1264192 | 261.1308824 |
| 264.407232 | 264.4098688 | 264.3890528 | 264.396136 | 264.3865264 | 264.1284192 | 261.1328824 |
| 264.411232 | 264.4118688 | 264.3900528 | 264.399136 | 264.3895264 | 264.1314192 | 261.1338824 |
| 264.410232 | 264.4118688 | 264.3890528 | 264.398136 | 264.3905264 | 264.1304192 | 261.1298824 |
| 264.412232 | 264.4118688 | 264.3890528 | 264.400136 | 264.3905264 | 264.1314192 | 261.1298824 |
| 264.413232 | 264.4138688 | 264.3910528 | 264.405136 | 264.3935264 | 264.1364192 | 261.1308824 |
| 264.415232 | 264.4168688 | 264.3920528 | 264.404136 | 264.3955264 | 264.1394192 | 261.1328824 |
| 264.415232 | 264.4148688 | 264.3900528 | 264.406136 | 264.3975264 | 264.1354192 | 261.1328824 |
| 264.414232 | 264.4148688 | 264.3890528 | 264.403136 | 264.3945264 | 264.1404192 | 261.1298824 |
| 264.417232 | 264.4178688 | 264.3910528 | 264.408136 | 264.3995264 | 264.1384192 | 261.1308824 |
| 264.417232 | 264.4178688 | 264.3910528 | 264.408136 | 264.3995264 | 264.1394192 | 261.1308824 |
| 264.420232 | 264.4198688 | 264.3910528 | 264.409136 | 264.4005264 | 264.1414192 | 261.1308824 |
| 264.422232 | 264.4208688 | 264.3920528 | 264.411136 | 264.4005264 | 264.1424192 | 261.1328824 |
| 264.421232 | 264.4208688 | 264.3920528 | 264.411136 | 264.4005264 | 264.1424192 | 261.1328824 |
| 264.421232 | 264.4208688 | 264.3920528 | 264.411136 | 264.4015264 | 264.1444192 | 261.1328824 |
| 264.423232 | 264.4208688 | 264.3920528 | 264.411136 | 264.4055264 | 264.1424192 | 261.1358824 |
| 264.422232 | 264.4228688 | 264.3940528 | 264.411136 | 264.4035264 | 264.1444192 | 261.1378824 |
| 264.424232 | 264.4228688 | 264.3940528 | 264.409136 | 264.4025264 | 264.1434192 | 261.1378824 |
| 264.420232 | 264.4228688 | 264.3930528 | 264.411136 | 264.4045264 | 264.1434192 | 261.1358824 |

|            |             |             |            |             |             |             |
|------------|-------------|-------------|------------|-------------|-------------|-------------|
| 264.424232 | 264.4218688 | 264.3920528 | 264.411136 | 264.4045264 | 264.1434192 | 261.1378824 |
| 264.422232 | 264.4208688 | 264.3920528 | 264.411136 | 264.4035264 | 264.1424192 | 261.1388824 |
| 264.423232 | 264.4218688 | 264.3930528 | 264.413136 | 264.4025264 | 264.1434192 | 261.1398824 |
| 264.424232 | 264.4218688 | 264.3930528 | 264.411136 | 264.4045264 | 264.1414192 | 261.1398824 |
| 264.426232 | 264.4228688 | 264.3940528 | 264.413136 | 264.4055264 | 264.1434192 | 261.1428824 |
| 264.426232 | 264.4228688 | 264.3940528 | 264.411136 | 264.4045264 | 264.1434192 | 261.1438824 |
| 264.426232 | 264.4228688 | 264.3940528 | 264.411136 | 264.4055264 | 264.1414192 | 261.1438824 |
| 264.424232 | 264.4228688 | 264.3940528 | 264.411136 | 264.4035264 | 264.1414192 | 261.1458824 |
| 264.423232 | 264.4228688 | 264.3960528 | 264.411136 | 264.4055264 | 264.1464192 | 261.1468824 |
| 264.423232 | 264.4248688 | 264.3960528 | 264.411136 | 264.4055264 | 264.1424192 | 261.1488824 |
| 264.422232 | 264.4228688 | 264.3940528 | 264.411136 | 264.4055264 | 264.1434192 | 261.1478824 |
| 264.425232 | 264.4248688 | 264.3970528 | 264.412136 | 264.4055264 | 264.1424192 | 261.1508824 |
| 264.425232 | 264.4248688 | 264.3970528 | 264.412136 | 264.4065264 | 264.1424192 | 261.1518824 |
| 264.424232 | 264.4228688 | 264.3960528 | 264.413136 | 264.4055264 | 264.1414192 | 261.1518824 |
| 264.424232 | 264.4228688 | 264.3950528 | 264.413136 | 264.4055264 | 264.1414192 | 261.1508824 |
| 264.423232 | 264.4238688 | 264.3950528 | 264.411136 | 264.4065264 | 264.1404192 | 261.1508824 |
| 264.425232 | 264.4238688 | 264.3970528 | 264.411136 | 264.4065264 | 264.1424192 | 261.1538824 |
| 264.424232 | 264.4218688 | 264.3960528 | 264.410136 | 264.4055264 | 264.1374192 | 261.1528824 |
| 264.425232 | 264.4238688 | 264.3990528 | 264.413136 | 264.4065264 | 264.1424192 | 261.1558824 |
| 264.424232 | 264.4228688 | 264.3980528 | 264.410136 | 264.4015264 | 264.1394192 | 261.1518824 |
| 264.424232 | 264.4228688 | 264.3980528 | 264.410136 | 264.4035264 | 264.1414192 | 261.1538824 |
| 264.423232 | 264.4228688 | 264.3980528 | 264.409136 | 264.4025264 | 264.1404192 | 261.1538824 |
| 264.420232 | 264.4208688 | 264.3990528 | 264.410136 | 264.4025264 | 264.1394192 | 261.1528824 |
| 264.421232 | 264.4198688 | 264.3980528 | 264.408136 | 264.4015264 | 264.1364192 | 261.1508824 |
| 264.423232 | 264.4218688 | 264.3980528 | 264.408136 | 264.4015264 | 264.1384192 | 261.1548824 |
| 264.421232 | 264.4218688 | 264.3960528 | 264.408136 | 264.4025264 | 264.1364192 | 261.1528824 |
| 264.422232 | 264.4218688 | 264.3970528 | 264.410136 | 264.4025264 | 264.1394192 | 261.1538824 |
| 264.420232 | 264.4208688 | 264.3960528 | 264.408136 | 264.4015264 | 264.1364192 | 261.1518824 |
| 264.422232 | 264.4228688 | 264.3960528 | 264.409136 | 264.4045264 | 264.1364192 | 261.1538824 |
| 264.420232 | 264.4198688 | 264.3950528 | 264.406136 | 264.4005264 | 264.1354192 | 261.1528824 |
| 264.422232 | 264.4208688 | 264.3950528 | 264.408136 | 264.4005264 | 264.1374192 | 261.1508824 |
| 264.421232 | 264.4218688 | 264.3960528 | 264.407136 | 264.3995264 | 264.1324192 | 261.1518824 |
| 264.420232 | 264.4208688 | 264.3970528 | 264.408136 | 264.3985264 | 264.1334192 | 261.1508824 |
| 264.422232 | 264.4238688 | 264.3970528 | 264.409136 | 264.4015264 | 264.1374192 | 261.1538824 |
| 264.420232 | 264.4208688 | 264.3970528 | 264.409136 | 264.4005264 | 264.1344192 | 261.1558824 |
| 264.423232 | 264.4208688 | 264.3940528 | 264.408136 | 264.4015264 | 264.1344192 | 261.1528824 |
| 264.422232 | 264.4208688 | 264.3950528 | 264.409136 | 264.4015264 | 264.1334192 | 261.1518824 |
| 264.422232 | 264.4208688 | 264.3970528 | 264.410136 | 264.4015264 | 264.1394192 | 261.1548824 |
| 264.423232 | 264.4218688 | 264.3970528 | 264.411136 | 264.4025264 | 264.1364192 | 261.1518824 |
| 264.423232 | 264.4218688 | 264.3940528 | 264.409136 | 264.4025264 | 264.1354192 | 261.1518824 |
| 264.422232 | 264.4218688 | 264.3960528 | 264.410136 | 264.4025264 | 264.1354192 | 261.1528824 |
| 264.423232 | 264.4238688 | 264.3960528 | 264.411136 | 264.4045264 | 264.1374192 | 261.1528824 |
| 264.421232 | 264.4238688 | 264.3960528 | 264.409136 | 264.4035264 | 264.1364192 | 261.1518824 |
| 264.424232 | 264.4238688 | 264.3970528 | 264.412136 | 264.4055264 | 264.1384192 | 261.1528824 |
| 264.423232 | 264.4238688 | 264.3980528 | 264.412136 | 264.4055264 | 264.1364192 | 261.1538824 |
| 264.425232 | 264.4248688 | 264.3980528 | 264.412136 | 264.4065264 | 264.1394192 | 261.1538824 |
| 264.426232 | 264.4258688 | 264.3980528 | 264.413136 | 264.4065264 | 264.1434192 | 261.1538824 |



|            |             |             |            |             |             |             |
|------------|-------------|-------------|------------|-------------|-------------|-------------|
| 264.426232 | 264.4268688 | 264.3990528 | 264.415136 | 264.4065264 | 264.1404192 | 261.1528824 |
| 264.428232 | 264.4278688 | 264.3990528 | 264.416136 | 264.4065264 | 264.1434192 | 261.1538824 |
| 264.427232 | 264.4268688 | 264.3980528 | 264.417136 | 264.4075264 | 264.1424192 | 261.1518824 |
| 264.424232 | 264.4258688 | 264.3970528 | 264.416136 | 264.4065264 | 264.1404192 | 261.1518824 |
| 264.426232 | 264.4268688 | 264.3990528 | 264.416136 | 264.4085264 | 264.1414192 | 261.1548824 |
| 264.427232 | 264.4278688 | 264.3980528 | 264.413136 | 264.4055264 | 264.1404192 | 261.1508824 |
| 264.426232 | 264.4248688 | 264.4000528 | 264.412136 | 264.4065264 | 264.1384192 | 261.1508824 |
| 264.428232 | 264.4258688 | 264.4000528 | 264.415136 | 264.4065264 | 264.1394192 | 261.1528824 |
| 264.425232 | 264.4248688 | 264.4000528 | 264.412136 | 264.4055264 | 264.1414192 | 261.1518824 |
| 264.426232 | 264.4258688 | 264.4000528 | 264.412136 | 264.4055264 | 264.1374192 | 261.1518824 |
| 264.426232 | 264.4288688 | 264.4020528 | 264.416136 | 264.4055264 | 264.1414192 | 261.1548824 |
| 264.423232 | 264.4258688 | 264.4010528 | 264.411136 | 264.4045264 | 264.1374192 | 261.1528824 |
| 264.426232 | 264.4248688 | 264.4000528 | 264.412136 | 264.4015264 | 264.1374192 | 261.1528824 |
| 264.424232 | 264.4228688 | 264.4000528 | 264.409136 | 264.4025264 | 264.1384192 | 261.1528824 |
| 264.423232 | 264.4238688 | 264.4010528 | 264.411136 | 264.4015264 | 264.1354192 | 261.1508824 |
| 264.425232 | 264.4248688 | 264.4020528 | 264.409136 | 264.4025264 | 264.1364192 | 261.1528824 |
| 264.420232 | 264.4218688 | 264.4010528 | 264.407136 | 264.4015264 | 264.1354192 | 261.1538824 |
| 264.423232 | 264.4218688 | 264.4020528 | 264.407136 | 264.4025264 | 264.1364192 | 261.1528824 |
| 264.420232 | 264.4218688 | 264.4010528 | 264.406136 | 264.3995264 | 264.1324192 | 261.1538824 |
| 264.417232 | 264.4188688 | 264.4010528 | 264.405136 | 264.3965264 | 264.1324192 | 261.1558824 |
| 264.417232 | 264.4208688 | 264.4030528 | 264.403136 | 264.3965264 | 264.1324192 | 261.1538824 |
| 264.417232 | 264.4208688 | 264.4010528 | 264.403136 | 264.3945264 | 264.1324192 | 261.1558824 |
| 264.412232 | 264.4148688 | 264.3990528 | 264.398136 | 264.3905264 | 264.1294192 | 261.1548824 |
| 264.413232 | 264.4168688 | 264.4010528 | 264.398136 | 264.3925264 | 264.1284192 | 261.1548824 |
| 264.411232 | 264.4138688 | 264.4010528 | 264.397136 | 264.3905264 | 264.1284192 | 261.1548824 |
| 264.410232 | 264.4138688 | 264.4000528 | 264.397136 | 264.3895264 | 264.1254192 | 261.1548824 |
| 264.405232 | 264.4138688 | 264.3980528 | 264.393136 | 264.3885264 | 264.1244192 | 261.1538824 |
| 264.409232 | 264.4138688 | 264.4000528 | 264.393136 | 264.3865264 | 264.1224192 | 261.1558824 |
| 264.405232 | 264.4088688 | 264.4000528 | 264.393136 | 264.3865264 | 264.1184192 | 261.1538824 |
| 264.404232 | 264.4078688 | 264.3990528 | 264.388136 | 264.3815264 | 264.1204192 | 261.1538824 |
| 264.402232 | 264.4078688 | 264.4010528 | 264.390136 | 264.3815264 | 264.1194192 | 261.1558824 |
| 264.402232 | 264.4078688 | 264.3990528 | 264.388136 | 264.3815264 | 264.1174192 | 261.1538824 |
| 264.399232 | 264.4048688 | 264.3940528 | 264.385136 | 264.3785264 | 264.1144192 | 261.1508824 |
| 264.399232 | 264.4048688 | 264.3960528 | 264.385136 | 264.3785264 | 264.1144192 | 261.1528824 |
| 264.399232 | 264.4038688 | 264.3960528 | 264.385136 | 264.3775264 | 264.1144192 | 261.1508824 |
| 264.399232 | 264.4048688 | 264.3980528 | 264.384136 | 264.3775264 | 264.1124192 | 261.1528824 |
| 264.396232 | 264.4018688 | 264.3950528 | 264.384136 | 264.3755264 | 264.1094192 | 261.1518824 |
| 264.397232 | 264.4058688 | 264.3960528 | 264.384136 | 264.3775264 | 264.1114192 | 261.1518824 |
| 264.393232 | 264.3988688 | 264.3940528 | 264.379136 | 264.3725264 | 264.1084192 | 261.1498824 |
| 264.396232 | 264.3998688 | 264.3950528 | 264.379136 | 264.3725264 | 264.1104192 | 261.1488824 |
| 264.391232 | 264.3968688 | 264.3920528 | 264.377136 | 264.3695264 | 264.1064192 | 261.1468824 |
| 264.393232 | 264.3978688 | 264.3920528 | 264.378136 | 264.3695264 | 264.1064192 | 261.1468824 |
| 264.388232 | 264.3948688 | 264.3910528 | 264.375136 | 264.3665264 | 264.1034192 | 261.1458824 |
| 264.393232 | 264.3978688 | 264.3930528 | 264.378136 | 264.3695264 | 264.1064192 | 261.1448824 |
| 264.393232 | 264.3958688 | 264.3930528 | 264.378136 | 264.3675264 | 264.1064192 | 261.1448824 |
| 264.390232 | 264.3938688 | 264.3910528 | 264.375136 | 264.3645264 | 264.1054192 | 261.1438824 |
| 264.393232 | 264.3978688 | 264.3930528 | 264.378136 | 264.3675264 | 264.1064192 | 261.1448824 |

|            |             |             |            |             |             |             |
|------------|-------------|-------------|------------|-------------|-------------|-------------|
| 264.390232 | 264.3948688 | 264.3910528 | 264.375136 | 264.3665264 | 264.1054192 | 261.1428824 |
| 264.389232 | 264.3938688 | 264.3890528 | 264.374136 | 264.3655264 | 264.1044192 | 261.1408824 |
| 264.387232 | 264.3938688 | 264.3860528 | 264.374136 | 264.3635264 | 264.1024192 | 261.1428824 |
| 264.387232 | 264.3918688 | 264.3860528 | 264.372136 | 264.3635264 | 264.1004192 | 261.1418824 |
| 264.389232 | 264.3938688 | 264.3880528 | 264.372136 | 264.3655264 | 264.1004192 | 261.1418824 |
| 264.385232 | 264.3898688 | 264.3870528 | 264.371136 | 264.3625264 | 264.1024192 | 261.1358824 |
| 264.386232 | 264.3928688 | 264.3870528 | 264.373136 | 264.3645264 | 264.1034192 | 261.1388824 |
| 264.386232 | 264.3938688 | 264.3890528 | 264.373136 | 264.3655264 | 264.1034192 | 261.1398824 |
| 264.389232 | 264.3948688 | 264.3870528 | 264.375136 | 264.3665264 | 264.1054192 | 261.1388824 |
| 264.387232 | 264.3918688 | 264.3860528 | 264.373136 | 264.3665264 | 264.1024192 | 261.1388824 |
| 264.391232 | 264.3928688 | 264.3860528 | 264.375136 | 264.3685264 | 264.1064192 | 261.1378824 |
| 264.391232 | 264.3948688 | 264.3870528 | 264.377136 | 264.3705264 | 264.1064192 | 261.1358824 |
| 264.391232 | 264.3948688 | 264.3870528 | 264.377136 | 264.3685264 | 264.1064192 | 261.1358824 |
| 264.394232 | 264.3948688 | 264.3850528 | 264.379136 | 264.3705264 | 264.1094192 | 261.1348824 |
| 264.395232 | 264.3968688 | 264.3870528 | 264.382136 | 264.3725264 | 264.1124192 | 261.1368824 |
| 264.394232 | 264.3958688 | 264.3820528 | 264.381136 | 264.3735264 | 264.1114192 | 261.1308824 |
| 264.398232 | 264.3968688 | 264.3840528 | 264.382136 | 264.3745264 | 264.1154192 | 261.1318824 |
| 264.400232 | 264.3998688 | 264.3840528 | 264.386136 | 264.3765264 | 264.1154192 | 261.1318824 |
| 264.402232 | 264.4018688 | 264.3840528 | 264.389136 | 264.3805264 | 264.1214192 | 261.1318824 |
| 264.406232 | 264.4038688 | 264.3860528 | 264.391136 | 264.3835264 | 264.1214192 | 261.1338824 |
| 264.405232 | 264.4058688 | 264.3830528 | 264.393136 | 264.3845264 | 264.1234192 | 261.1298824 |
| 264.408232 | 264.4088688 | 264.3870528 | 264.396136 | 264.3865264 | 264.1294192 | 261.1298824 |
| 264.410232 | 264.4098688 | 264.3870528 | 264.399136 | 264.3895264 | 264.1294192 | 261.1298824 |
| 264.414232 | 264.4118688 | 264.3870528 | 264.401136 | 264.3895264 | 264.1324192 | 261.1298824 |
| 264.414232 | 264.4148688 | 264.3890528 | 264.401136 | 264.3925264 | 264.1344192 | 261.1308824 |
| 264.414232 | 264.4128688 | 264.3870528 | 264.403136 | 264.3935264 | 264.1384192 | 261.1268824 |
| 264.418232 | 264.4168688 | 264.3890528 | 264.403136 | 264.3945264 | 264.1384192 | 261.1268824 |
| 264.421232 | 264.4198688 | 264.3900528 | 264.406136 | 264.3985264 | 264.1394192 | 261.1278824 |
| 264.418232 | 264.4198688 | 264.3910528 | 264.406136 | 264.3965264 | 264.1424192 | 261.1248824 |
| 264.421232 | 264.4208688 | 264.3920528 | 264.407136 | 264.3995264 | 264.1414192 | 261.1298824 |
| 264.421232 | 264.4208688 | 264.3920528 | 264.409136 | 264.3985264 | 264.1414192 | 261.1278824 |
| 264.422232 | 264.4228688 | 264.3940528 | 264.409136 | 264.4025264 | 264.1424192 | 261.1288824 |
| 264.419232 | 264.4228688 | 264.3920528 | 264.407136 | 264.3995264 | 264.1414192 | 261.1298824 |
| 264.421232 | 264.4218688 | 264.3940528 | 264.411136 | 264.3995264 | 264.1434192 | 261.1308824 |
| 264.421232 | 264.4208688 | 264.3940528 | 264.408136 | 264.3995264 | 264.1384192 | 261.1308824 |
| 264.418232 | 264.4208688 | 264.3930528 | 264.406136 | 264.3985264 | 264.1404192 | 261.1328824 |
| 264.424232 | 264.4238688 | 264.3960528 | 264.409136 | 264.4025264 | 264.1434192 | 261.1338824 |
| 264.421232 | 264.4208688 | 264.3940528 | 264.407136 | 264.3995264 | 264.1414192 | 261.1358824 |
| 264.420232 | 264.4208688 | 264.3970528 | 264.409136 | 264.3995264 | 264.1414192 | 261.1388824 |
| 264.420232 | 264.4208688 | 264.3930528 | 264.406136 | 264.3995264 | 264.1414192 | 261.1368824 |
| 264.418232 | 264.4188688 | 264.3930528 | 264.404136 | 264.3975264 | 264.1394192 | 261.1368824 |
| 264.419232 | 264.4218688 | 264.3960528 | 264.407136 | 264.4005264 | 264.1384192 | 261.1398824 |
| 264.419232 | 264.4198688 | 264.3960528 | 264.406136 | 264.4005264 | 264.1394192 | 261.1418824 |
| 264.417232 | 264.4188688 | 264.3960528 | 264.405136 | 264.3985264 | 264.1384192 | 261.1418824 |
| 264.418232 | 264.4208688 | 264.3950528 | 264.406136 | 264.3995264 | 264.1364192 | 261.1458824 |
| 264.419232 | 264.4188688 | 264.3960528 | 264.407136 | 264.3985264 | 264.1364192 | 261.1438824 |
| 264.418232 | 264.4188688 | 264.3960528 | 264.405136 | 264.3985264 | 264.1364192 | 261.1448824 |

|            |             |             |            |             |             |             |
|------------|-------------|-------------|------------|-------------|-------------|-------------|
| 264.418232 | 264.4188688 | 264.3950528 | 264.405136 | 264.3995264 | 264.1334192 | 261.1468824 |
| 264.416232 | 264.4188688 | 264.3950528 | 264.405136 | 264.3975264 | 264.1334192 | 261.1448824 |
| 264.415232 | 264.4188688 | 264.3960528 | 264.403136 | 264.3975264 | 264.1344192 | 261.1478824 |
| 264.416232 | 264.4178688 | 264.3950528 | 264.404136 | 264.3985264 | 264.1314192 | 261.1468824 |
| 264.416232 | 264.4178688 | 264.3970528 | 264.405136 | 264.3985264 | 264.1334192 | 261.1488824 |
| 264.417232 | 264.4188688 | 264.3960528 | 264.405136 | 264.3975264 | 264.1324192 | 261.1498824 |
| 264.415232 | 264.4158688 | 264.3950528 | 264.402136 | 264.3945264 | 264.1314192 | 261.1478824 |
| 264.417232 | 264.4178688 | 264.3940528 | 264.403136 | 264.3955264 | 264.1284192 | 261.1478824 |
| 264.414232 | 264.4158688 | 264.3960528 | 264.403136 | 264.3975264 | 264.1304192 | 261.1478824 |
| 264.414232 | 264.4158688 | 264.3960528 | 264.403136 | 264.3975264 | 264.1304192 | 261.1498824 |
| 264.416232 | 264.4168688 | 264.3950528 | 264.403136 | 264.3955264 | 264.1294192 | 261.1508824 |
| 264.416232 | 264.4168688 | 264.3950528 | 264.403136 | 264.3955264 | 264.1294192 | 261.1478824 |
| 264.416232 | 264.4168688 | 264.3950528 | 264.401136 | 264.3955264 | 264.1294192 | 261.1508824 |
| 264.414232 | 264.4168688 | 264.3970528 | 264.403136 | 264.3965264 | 264.1294192 | 261.1488824 |
| 264.412232 | 264.4138688 | 264.3940528 | 264.400136 | 264.3935264 | 264.1284192 | 261.1488824 |
| 264.414232 | 264.4138688 | 264.3940528 | 264.400136 | 264.3935264 | 264.1314192 | 261.1458824 |
| 264.412232 | 264.4138688 | 264.3940528 | 264.400136 | 264.3935264 | 264.1284192 | 261.1488824 |
| 264.412232 | 264.4138688 | 264.3940528 | 264.398136 | 264.3915264 | 264.1264192 | 261.1488824 |
| 264.410232 | 264.4138688 | 264.3940528 | 264.398136 | 264.3915264 | 264.1284192 | 261.1488824 |
| 264.409232 | 264.4108688 | 264.3920528 | 264.397136 | 264.3905264 | 264.1264192 | 261.1458824 |
| 264.409232 | 264.4128688 | 264.3920528 | 264.397136 | 264.3915264 | 264.1264192 | 261.1478824 |
| 264.409232 | 264.4128688 | 264.3940528 | 264.396136 | 264.3895264 | 264.1284192 | 261.1508824 |
| 264.410232 | 264.4128688 | 264.3920528 | 264.398136 | 264.3915264 | 264.1284192 | 261.1488824 |
| 264.409232 | 264.4108688 | 264.3900528 | 264.397136 | 264.3885264 | 264.1264192 | 261.1478824 |
| 264.409232 | 264.4098688 | 264.3900528 | 264.398136 | 264.3905264 | 264.1244192 | 261.1478824 |
| 264.408232 | 264.4098688 | 264.3910528 | 264.395136 | 264.3885264 | 264.1274192 | 261.1478824 |
| 264.409232 | 264.4108688 | 264.3900528 | 264.397136 | 264.3905264 | 264.1284192 | 261.1508824 |
| 264.408232 | 264.4098688 | 264.3890528 | 264.395136 | 264.3885264 | 264.1254192 | 261.1478824 |
| 264.409232 | 264.4108688 | 264.3910528 | 264.397136 | 264.3885264 | 264.1254192 | 261.1478824 |
| 264.408232 | 264.4108688 | 264.3890528 | 264.397136 | 264.3905264 | 264.1254192 | 261.1478824 |
| 264.406232 | 264.4098688 | 264.3890528 | 264.396136 | 264.3875264 | 264.1254192 | 261.1478824 |
| 264.406232 | 264.4098688 | 264.3890528 | 264.397136 | 264.3895264 | 264.1234192 | 261.1468824 |
| 264.409232 | 264.4088688 | 264.3900528 | 264.396136 | 264.3875264 | 264.1244192 | 261.1458824 |
| 264.410232 | 264.4118688 | 264.3930528 | 264.399136 | 264.3925264 | 264.1274192 | 261.1498824 |
| 264.410232 | 264.4118688 | 264.3930528 | 264.397136 | 264.3895264 | 264.1254192 | 261.1498824 |
| 264.410232 | 264.4118688 | 264.3910528 | 264.401136 | 264.3925264 | 264.1294192 | 261.1468824 |
| 264.410232 | 264.4128688 | 264.3900528 | 264.399136 | 264.3925264 | 264.1274192 | 261.1488824 |
| 264.410232 | 264.4118688 | 264.3920528 | 264.399136 | 264.3915264 | 264.1294192 | 261.1488824 |
| 264.412232 | 264.4128688 | 264.3930528 | 264.401136 | 264.3925264 | 264.1294192 | 261.1488824 |
| 264.412232 | 264.4128688 | 264.3910528 | 264.401136 | 264.3945264 | 264.1314192 | 261.1458824 |
| 264.412232 | 264.4148688 | 264.3910528 | 264.401136 | 264.3945264 | 264.1314192 | 261.1458824 |
| 264.414232 | 264.4128688 | 264.3930528 | 264.401136 | 264.3945264 | 264.1294192 | 261.1458824 |
| 264.415232 | 264.4158688 | 264.3920528 | 264.405136 | 264.3975264 | 264.1354192 | 261.1478824 |
| 264.417232 | 264.4158688 | 264.3940528 | 264.403136 | 264.3955264 | 264.1344192 | 261.1478824 |
| 264.417232 | 264.4158688 | 264.3920528 | 264.403136 | 264.3975264 | 264.1324192 | 261.1478824 |
| 264.417232 | 264.4178688 | 264.3910528 | 264.406136 | 264.3985264 | 264.1354192 | 261.1478824 |
| 264.418232 | 264.4188688 | 264.3940528 | 264.408136 | 264.3975264 | 264.1354192 | 261.1468824 |

|            |             |             |            |             |             |             |
|------------|-------------|-------------|------------|-------------|-------------|-------------|
| 264.418232 | 264.4178688 | 264.3960528 | 264.407136 | 264.3985264 | 264.1374192 | 261.1468824 |
| 264.420232 | 264.4208688 | 264.3940528 | 264.408136 | 264.4005264 | 264.1374192 | 261.1468824 |
| 264.420232 | 264.4208688 | 264.3960528 | 264.408136 | 264.4005264 | 264.1374192 | 261.1468824 |
| 264.423232 | 264.4218688 | 264.3960528 | 264.409136 | 264.4015264 | 264.1394192 | 261.1478824 |
| 264.422232 | 264.4208688 | 264.3960528 | 264.409136 | 264.3985264 | 264.1394192 | 261.1468824 |
| 264.423232 | 264.4238688 | 264.3990528 | 264.411136 | 264.4035264 | 264.1404192 | 261.1488824 |
| 264.423232 | 264.4238688 | 264.3970528 | 264.409136 | 264.4015264 | 264.1424192 | 261.1498824 |
| 264.423232 | 264.4248688 | 264.3990528 | 264.411136 | 264.4035264 | 264.1424192 | 261.1488824 |
| 264.423232 | 264.4238688 | 264.3970528 | 264.412136 | 264.4035264 | 264.1404192 | 261.1498824 |
| 264.423232 | 264.4268688 | 264.3990528 | 264.412136 | 264.4035264 | 264.1424192 | 261.1528824 |
| 264.424232 | 264.4258688 | 264.3980528 | 264.411136 | 264.4025264 | 264.1424192 | 261.1498824 |
| 264.425232 | 264.4238688 | 264.3990528 | 264.411136 | 264.4035264 | 264.1394192 | 261.1498824 |
| 264.425232 | 264.4248688 | 264.3990528 | 264.411136 | 264.4045264 | 264.1404192 | 261.1508824 |
| 264.424232 | 264.4248688 | 264.4020528 | 264.412136 | 264.4025264 | 264.1434192 | 261.1538824 |
| 264.426232 | 264.4248688 | 264.4030528 | 264.412136 | 264.4025264 | 264.1414192 | 261.1518824 |
| 264.424232 | 264.4248688 | 264.4010528 | 264.412136 | 264.4045264 | 264.1394192 | 261.1538824 |
| 264.423232 | 264.4238688 | 264.3970528 | 264.409136 | 264.4015264 | 264.1384192 | 261.1528824 |
| 264.423232 | 264.4248688 | 264.4010528 | 264.408136 | 264.4025264 | 264.1394192 | 261.1538824 |
| 264.422232 | 264.4228688 | 264.4000528 | 264.407136 | 264.4005264 | 264.1374192 | 261.1538824 |
| 264.422232 | 264.4218688 | 264.4000528 | 264.407136 | 264.3995264 | 264.1374192 | 261.1518824 |
| 264.422232 | 264.4208688 | 264.4010528 | 264.405136 | 264.3985264 | 264.1354192 | 261.1538824 |
| 264.418232 | 264.4208688 | 264.3990528 | 264.402136 | 264.3975264 | 264.1354192 | 261.1548824 |
| 264.418232 | 264.4198688 | 264.3970528 | 264.403136 | 264.3975264 | 264.1324192 | 261.1538824 |
| 264.417232 | 264.4198688 | 264.3990528 | 264.403136 | 264.3965264 | 264.1334192 | 261.1548824 |
| 264.414232 | 264.4178688 | 264.4000528 | 264.401136 | 264.3935264 | 264.1334192 | 261.1548824 |
| 264.417232 | 264.4188688 | 264.4020528 | 264.403136 | 264.3965264 | 264.1344192 | 261.1558824 |
| 264.415232 | 264.4188688 | 264.4010528 | 264.401136 | 264.3945264 | 264.1324192 | 261.1558824 |
| 264.413232 | 264.4158688 | 264.4010528 | 264.399136 | 264.3925264 | 264.1284192 | 261.1538824 |
| 264.408232 | 264.4128688 | 264.4000528 | 264.396136 | 264.3895264 | 264.1254192 | 261.1538824 |
| 264.410232 | 264.4138688 | 264.4000528 | 264.397136 | 264.3885264 | 264.1274192 | 261.1568824 |
| 264.410232 | 264.4138688 | 264.4000528 | 264.397136 | 264.3905264 | 264.1274192 | 261.1568824 |
| 264.405232 | 264.4108688 | 264.3990528 | 264.393136 | 264.3835264 | 264.1244192 | 261.1558824 |
| 264.405232 | 264.4098688 | 264.4000528 | 264.391136 | 264.3825264 | 264.1234192 | 261.1558824 |
| 264.405232 | 264.4078688 | 264.3970528 | 264.391136 | 264.3815264 | 264.1194192 | 261.1538824 |
| 264.401232 | 264.4078688 | 264.3950528 | 264.389136 | 264.3805264 | 264.1194192 | 261.1528824 |
| 264.401232 | 264.4058688 | 264.3990528 | 264.389136 | 264.3795264 | 264.1184192 | 261.1538824 |
| 264.401232 | 264.4048688 | 264.3970528 | 264.388136 | 264.3785264 | 264.1164192 | 261.1558824 |
| 264.401232 | 264.4058688 | 264.3960528 | 264.387136 | 264.3775264 | 264.1184192 | 261.1538824 |
| 264.399232 | 264.4028688 | 264.3960528 | 264.387136 | 264.3755264 | 264.1144192 | 261.1548824 |
| 264.398232 | 264.4028688 | 264.3940528 | 264.384136 | 264.3755264 | 264.1124192 | 261.1528824 |
| 264.397232 | 264.4038688 | 264.3950528 | 264.383136 | 264.3745264 | 264.1134192 | 261.1528824 |
| 264.397232 | 264.4018688 | 264.3960528 | 264.383136 | 264.3725264 | 264.1124192 | 261.1528824 |
| 264.396232 | 264.4018688 | 264.3960528 | 264.383136 | 264.3725264 | 264.1124192 | 261.1518824 |
| 264.395232 | 264.3988688 | 264.3920528 | 264.379136 | 264.3705264 | 264.1084192 | 261.1508824 |
| 264.394232 | 264.3988688 | 264.3950528 | 264.379136 | 264.3705264 | 264.1094192 | 261.1498824 |
| 264.391232 | 264.3958688 | 264.3920528 | 264.378136 | 264.3685264 | 264.1104192 | 261.1468824 |
| 264.392232 | 264.3968688 | 264.3920528 | 264.377136 | 264.3705264 | 264.1064192 | 261.1468824 |

|            |             |             |            |             |             |             |
|------------|-------------|-------------|------------|-------------|-------------|-------------|
| 264.390232 | 264.3938688 | 264.3900528 | 264.376136 | 264.3665264 | 264.1074192 | 261.1468824 |
| 264.390232 | 264.3948688 | 264.3900528 | 264.376136 | 264.3665264 | 264.1064192 | 261.1468824 |
| 264.388232 | 264.3938688 | 264.3910528 | 264.374136 | 264.3645264 | 264.1054192 | 261.1468824 |
| 264.389232 | 264.3938688 | 264.3900528 | 264.375136 | 264.3665264 | 264.1054192 | 261.1468824 |
| 264.390232 | 264.3918688 | 264.3900528 | 264.374136 | 264.3635264 | 264.1034192 | 261.1438824 |
| 264.388232 | 264.3918688 | 264.3890528 | 264.372136 | 264.3645264 | 264.1034192 | 261.1428824 |
| 264.387232 | 264.3918688 | 264.3890528 | 264.374136 | 264.3645264 | 264.1034192 | 261.1448824 |
| 264.387232 | 264.3928688 | 264.3890528 | 264.374136 | 264.3645264 | 264.1044192 | 261.1428824 |
| 264.387232 | 264.3928688 | 264.3890528 | 264.373136 | 264.3635264 | 264.1024192 | 261.1428824 |
| 264.388232 | 264.3928688 | 264.3880528 | 264.376136 | 264.3655264 | 264.1044192 | 261.1428824 |
| 264.386232 | 264.3908688 | 264.3880528 | 264.375136 | 264.3655264 | 264.1024192 | 261.1388824 |
| 264.388232 | 264.3898688 | 264.3860528 | 264.373136 | 264.3635264 | 264.1024192 | 261.1378824 |
| 264.387232 | 264.3928688 | 264.3870528 | 264.376136 | 264.3645264 | 264.1064192 | 261.1388824 |
| 264.389232 | 264.3908688 | 264.3860528 | 264.374136 | 264.3665264 | 264.1054192 | 261.1388824 |
| 264.391232 | 264.3928688 | 264.3860528 | 264.378136 | 264.3665264 | 264.1064192 | 261.1388824 |
| 264.390232 | 264.3938688 | 264.3860528 | 264.376136 | 264.3665264 | 264.1084192 | 261.1378824 |
| 264.391232 | 264.3938688 | 264.3860528 | 264.381136 | 264.3695264 | 264.1084192 | 261.1368824 |
| 264.395232 | 264.3958688 | 264.3840528 | 264.379136 | 264.3705264 | 264.1104192 | 261.1338824 |
| 264.398232 | 264.3988688 | 264.3860528 | 264.386136 | 264.3735264 | 264.1144192 | 261.1358824 |
| 264.400232 | 264.4008688 | 264.3870528 | 264.387136 | 264.3765264 | 264.1154192 | 261.1338824 |
| 264.400232 | 264.4018688 | 264.3860528 | 264.387136 | 264.3765264 | 264.1174192 | 261.1308824 |
| 264.404232 | 264.4038688 | 264.3900528 | 264.391136 | 264.3805264 | 264.1214192 | 261.1338824 |
| 264.405232 | 264.4038688 | 264.3870528 | 264.393136 | 264.3825264 | 264.1264192 | 261.1318824 |
| 264.408232 | 264.4088688 | 264.3880528 | 264.396136 | 264.3875264 | 264.1274192 | 261.1328824 |
| 264.410232 | 264.4098688 | 264.3880528 | 264.397136 | 264.3875264 | 264.1324192 | 261.1308824 |
| 264.411232 | 264.4088688 | 264.3890528 | 264.398136 | 264.3875264 | 264.1314192 | 261.1298824 |
| 264.412232 | 264.4138688 | 264.3910528 | 264.401136 | 264.3895264 | 264.1334192 | 261.1318824 |
| 264.413232 | 264.4128688 | 264.3880528 | 264.402136 | 264.3915264 | 264.1344192 | 261.1288824 |
| 264.411232 | 264.4128688 | 264.3880528 | 264.402136 | 264.3915264 | 264.1364192 | 261.1268824 |
| 264.417232 | 264.4168688 | 264.3900528 | 264.406136 | 264.3955264 | 264.1394192 | 261.1308824 |
| 264.415232 | 264.4168688 | 264.3900528 | 264.405136 | 264.3935264 | 264.1404192 | 261.1308824 |
| 264.420232 | 264.4188688 | 264.3930528 | 264.406136 | 264.4005264 | 264.1434192 | 261.1308824 |
| 264.418232 | 264.4178688 | 264.3920528 | 264.405136 | 264.3975264 | 264.1394192 | 261.1278824 |
| 264.420232 | 264.4188688 | 264.3940528 | 264.409136 | 264.3995264 | 264.1404192 | 261.1298824 |
| 264.417232 | 264.4178688 | 264.3930528 | 264.406136 | 264.3965264 | 264.1414192 | 261.1298824 |
| 264.420232 | 264.4198688 | 264.3950528 | 264.407136 | 264.4005264 | 264.1414192 | 261.1298824 |
| 264.418232 | 264.4198688 | 264.3960528 | 264.406136 | 264.3975264 | 264.1404192 | 261.1288824 |
| 264.421232 | 264.4198688 | 264.3970528 | 264.408136 | 264.3985264 | 264.1404192 | 261.1318824 |
| 264.419232 | 264.4218688 | 264.3970528 | 264.408136 | 264.3985264 | 264.1404192 | 261.1338824 |
| 264.420232 | 264.4218688 | 264.3980528 | 264.410136 | 264.3975264 | 264.1424192 | 261.1358824 |
| 264.416232 | 264.4188688 | 264.3970528 | 264.404136 | 264.3955264 | 264.1364192 | 261.1358824 |
| 264.416232 | 264.4178688 | 264.3960528 | 264.406136 | 264.3975264 | 264.1394192 | 261.1348824 |
| 264.416232 | 264.4188688 | 264.3970528 | 264.403136 | 264.3955264 | 264.1374192 | 261.1398824 |
| 264.418232 | 264.4188688 | 264.3990528 | 264.404136 | 264.3955264 | 264.1374192 | 261.1398824 |
| 264.418232 | 264.4188688 | 264.3990528 | 264.404136 | 264.3975264 | 264.1374192 | 261.1398824 |
| 264.420232 | 264.4198688 | 264.3980528 | 264.404136 | 264.3975264 | 264.1354192 | 261.1428824 |
| 264.415232 | 264.4168688 | 264.3970528 | 264.403136 | 264.3945264 | 264.1344192 | 261.1418824 |

|            |             |             |            |             |             |             |
|------------|-------------|-------------|------------|-------------|-------------|-------------|
| 264.419232 | 264.4198688 | 264.4000528 | 264.405136 | 264.3965264 | 264.1374192 | 261.1448824 |
| 264.417232 | 264.4178688 | 264.4000528 | 264.403136 | 264.3985264 | 264.1364192 | 261.1448824 |
| 264.417232 | 264.4178688 | 264.3990528 | 264.403136 | 264.3965264 | 264.1364192 | 261.1448824 |
| 264.414232 | 264.4188688 | 264.3970528 | 264.400136 | 264.3915264 | 264.1304192 | 261.1418824 |
| 264.416232 | 264.4188688 | 264.3990528 | 264.402136 | 264.3945264 | 264.1334192 | 261.1468824 |
| 264.414232 | 264.4168688 | 264.3990528 | 264.399136 | 264.3935264 | 264.1334192 | 261.1468824 |
| 264.415232 | 264.4168688 | 264.3980528 | 264.402136 | 264.3935264 | 264.1344192 | 261.1478824 |
| 264.415232 | 264.4188688 | 264.4000528 | 264.401136 | 264.3955264 | 264.1324192 | 261.1468824 |
| 264.417232 | 264.4188688 | 264.3980528 | 264.402136 | 264.3955264 | 264.1324192 | 261.1478824 |
| 264.419232 | 264.4188688 | 264.4000528 | 264.404136 | 264.3955264 | 264.1344192 | 261.1488824 |
| 264.417232 | 264.4198688 | 264.4010528 | 264.404136 | 264.3995264 | 264.1344192 | 261.1508824 |
| 264.422232 | 264.4218688 | 264.4030528 | 264.406136 | 264.3975264 | 264.1324192 | 261.1488824 |
| 264.419232 | 264.4188688 | 264.4000528 | 264.404136 | 264.3965264 | 264.1334192 | 261.1498824 |
| 264.418232 | 264.4178688 | 264.3990528 | 264.403136 | 264.3965264 | 264.1334192 | 261.1498824 |
| 264.418232 | 264.4198688 | 264.4010528 | 264.403136 | 264.3965264 | 264.1324192 | 261.1498824 |
| 264.418232 | 264.4198688 | 264.4010528 | 264.405136 | 264.3965264 | 264.1344192 | 261.1498824 |
| 264.417232 | 264.4178688 | 264.4010528 | 264.403136 | 264.3935264 | 264.1324192 | 261.1498824 |
| 264.416232 | 264.4168688 | 264.4020528 | 264.401136 | 264.3945264 | 264.1314192 | 261.1468824 |
| 264.416232 | 264.4168688 | 264.4000528 | 264.401136 | 264.3925264 | 264.1334192 | 261.1488824 |
| 264.416232 | 264.4188688 | 264.4020528 | 264.402136 | 264.3965264 | 264.1334192 | 261.1508824 |
| 264.416232 | 264.4168688 | 264.4010528 | 264.401136 | 264.3945264 | 264.1334192 | 261.1508824 |
| 264.417232 | 264.4168688 | 264.4010528 | 264.403136 | 264.3945264 | 264.1324192 | 261.1508824 |
| 264.414232 | 264.4158688 | 264.4010528 | 264.400136 | 264.3935264 | 264.1294192 | 261.1508824 |
| 264.415232 | 264.4178688 | 264.4030528 | 264.401136 | 264.3935264 | 264.1324192 | 261.1498824 |
| 264.415232 | 264.4148688 | 264.3990528 | 264.400136 | 264.3925264 | 264.1284192 | 261.1488824 |
| 264.413232 | 264.4148688 | 264.4010528 | 264.399136 | 264.3915264 | 264.1284192 | 261.1498824 |
| 264.415232 | 264.4178688 | 264.4010528 | 264.402136 | 264.3925264 | 264.1304192 | 261.1498824 |
| 264.414232 | 264.4148688 | 264.4010528 | 264.400136 | 264.3925264 | 264.1304192 | 261.1498824 |
| 264.415232 | 264.4168688 | 264.4010528 | 264.400136 | 264.3915264 | 264.1284192 | 261.1508824 |
| 264.413232 | 264.4148688 | 264.3980528 | 264.399136 | 264.3915264 | 264.1254192 | 261.1478824 |
| 264.412232 | 264.4148688 | 264.4000528 | 264.401136 | 264.3915264 | 264.1274192 | 261.1478824 |
| 264.414232 | 264.4148688 | 264.4000528 | 264.402136 | 264.3935264 | 264.1264192 | 261.1488824 |
| 264.417232 | 264.4148688 | 264.4010528 | 264.402136 | 264.3955264 | 264.1314192 | 261.1488824 |
| 264.412232 | 264.4148688 | 264.4020528 | 264.401136 | 264.3935264 | 264.1294192 | 261.1478824 |
| 264.415232 | 264.4168688 | 264.4000528 | 264.404136 | 264.3955264 | 264.1314192 | 261.1488824 |
| 264.414232 | 264.4168688 | 264.4000528 | 264.404136 | 264.3935264 | 264.1314192 | 261.1478824 |
| 264.419232 | 264.4188688 | 264.4000528 | 264.404136 | 264.3975264 | 264.1314192 | 261.1478824 |
| 264.419232 | 264.4198688 | 264.4020528 | 264.405136 | 264.3975264 | 264.1354192 | 261.1488824 |
| 264.423232 | 264.4198688 | 264.4020528 | 264.407136 | 264.3975264 | 264.1354192 | 261.1488824 |
| 264.419232 | 264.4188688 | 264.4020528 | 264.406136 | 264.3975264 | 264.1374192 | 261.1478824 |
| 264.421232 | 264.4218688 | 264.4020528 | 264.409136 | 264.4005264 | 264.1394192 | 261.1478824 |
| 264.423232 | 264.4218688 | 264.4040528 | 264.407136 | 264.3995264 | 264.1394192 | 261.1498824 |
| 264.422232 | 264.4208688 | 264.4010528 | 264.406136 | 264.3995264 | 264.1374192 | 261.1468824 |
| 264.422232 | 264.4208688 | 264.4010528 | 264.409136 | 264.3995264 | 264.1364192 | 261.1478824 |
| 264.422232 | 264.4218688 | 264.4010528 | 264.410136 | 264.3995264 | 264.1384192 | 261.1468824 |
| 264.424232 | 264.4248688 | 264.4030528 | 264.411136 | 264.4035264 | 264.1394192 | 261.1478824 |
| 264.423232 | 264.4228688 | 264.4020528 | 264.408136 | 264.4025264 | 264.1404192 | 261.1468824 |

|            |             |             |            |             |             |             |
|------------|-------------|-------------|------------|-------------|-------------|-------------|
| 264.425232 | 264.4238688 | 264.4020528 | 264.411136 | 264.4055264 | 264.1384192 | 261.1468824 |
| 264.427232 | 264.4238688 | 264.4020528 | 264.412136 | 264.4045264 | 264.1414192 | 261.1468824 |
| 264.427232 | 264.4268688 | 264.4040528 | 264.412136 | 264.4055264 | 264.1424192 | 261.1488824 |
| 264.427232 | 264.4278688 | 264.4040528 | 264.415136 | 264.4075264 | 264.1434192 | 261.1458824 |
| 264.428232 | 264.4258688 | 264.4030528 | 264.414136 | 264.4065264 | 264.1454192 | 261.1458824 |
| 264.428232 | 264.4258688 | 264.4030528 | 264.416136 | 264.4065264 | 264.1444192 | 261.1478824 |
| 264.430232 | 264.4278688 | 264.4030528 | 264.416136 | 264.4085264 | 264.1454192 | 261.1478824 |
| 264.430232 | 264.4298688 | 264.4050528 | 264.417136 | 264.4085264 | 264.1454192 | 261.1478824 |
| 264.428232 | 264.4268688 | 264.4040528 | 264.416136 | 264.4085264 | 264.1444192 | 261.1468824 |
| 264.429232 | 264.4278688 | 264.4060528 | 264.414136 | 264.4075264 | 264.1444192 | 261.1448824 |
| 264.431232 | 264.4298688 | 264.4070528 | 264.416136 | 264.4085264 | 264.1464192 | 261.1488824 |
| 264.432232 | 264.4308688 | 264.4070528 | 264.417136 | 264.4085264 | 264.1474192 | 261.1498824 |
| 264.433232 | 264.4298688 | 264.4070528 | 264.418136 | 264.4085264 | 264.1464192 | 261.1498824 |
| 264.431232 | 264.4298688 | 264.4060528 | 264.416136 | 264.4085264 | 264.1464192 | 261.1498824 |
| 264.432232 | 264.4308688 | 264.4090528 | 264.419136 | 264.4105264 | 264.1474192 | 261.1498824 |
| 264.431232 | 264.4308688 | 264.4060528 | 264.418136 | 264.4105264 | 264.1424192 | 261.1488824 |
| 264.433232 | 264.4308688 | 264.4070528 | 264.418136 | 264.4105264 | 264.1484192 | 261.1498824 |
| 264.429232 | 264.4298688 | 264.4060528 | 264.415136 | 264.4075264 | 264.1434192 | 261.1498824 |
| 264.428232 | 264.4298688 | 264.4070528 | 264.416136 | 264.4065264 | 264.1464192 | 261.1498824 |
| 264.427232 | 264.4298688 | 264.4070528 | 264.414136 | 264.4065264 | 264.1444192 | 261.1518824 |
| 264.428232 | 264.4278688 | 264.4070528 | 264.414136 | 264.4065264 | 264.1444192 | 261.1528824 |
| 264.426232 | 264.4308688 | 264.4100528 | 264.414136 | 264.4095264 | 264.1454192 | 261.1548824 |
| 264.425232 | 264.4268688 | 264.4090528 | 264.411136 | 264.4045264 | 264.1424192 | 261.1528824 |
| 264.423232 | 264.4278688 | 264.4070528 | 264.411136 | 264.4045264 | 264.1404192 | 261.1528824 |
| 264.422232 | 264.4268688 | 264.4070528 | 264.410136 | 264.4055264 | 264.1394192 | 261.1528824 |
| 264.422232 | 264.4248688 | 264.4080528 | 264.408136 | 264.4025264 | 264.1414192 | 261.1568824 |
| 264.420232 | 264.4238688 | 264.4080528 | 264.407136 | 264.4005264 | 264.1374192 | 261.1538824 |
| 264.420232 | 264.4218688 | 264.4070528 | 264.405136 | 264.4005264 | 264.1374192 | 261.1548824 |
| 264.418232 | 264.4218688 | 264.4060528 | 264.407136 | 264.3985264 | 264.1344192 | 261.1548824 |
| 264.418232 | 264.4218688 | 264.4070528 | 264.403136 | 264.3965264 | 264.1354192 | 261.1568824 |
| 264.418232 | 264.4218688 | 264.4070528 | 264.405136 | 264.3985264 | 264.1354192 | 261.1568824 |
| 264.416232 | 264.4208688 | 264.4070528 | 264.403136 | 264.3925264 | 264.1314192 | 261.1558824 |
| 264.417232 | 264.4198688 | 264.4070528 | 264.404136 | 264.3965264 | 264.1314192 | 261.1558824 |
| 264.415232 | 264.4178688 | 264.4070528 | 264.399136 | 264.3925264 | 264.1314192 | 261.1558824 |
| 264.414232 | 264.4168688 | 264.4070528 | 264.398136 | 264.3925264 | 264.1274192 | 261.1578824 |
| 264.410232 | 264.4168688 | 264.4070528 | 264.399136 | 264.3915264 | 264.1274192 | 261.1578824 |
| 264.409232 | 264.4168688 | 264.4040528 | 264.397136 | 264.3885264 | 264.1274192 | 261.1578824 |
| 264.411232 | 264.4158688 | 264.4080528 | 264.399136 | 264.3905264 | 264.1284192 | 261.1588824 |
| 264.406232 | 264.4118688 | 264.4050528 | 264.393136 | 264.3855264 | 264.1254192 | 261.1548824 |
| 264.408232 | 264.4118688 | 264.4050528 | 264.393136 | 264.3875264 | 264.1254192 | 261.1558824 |
| 264.408232 | 264.4118688 | 264.4040528 | 264.393136 | 264.3875264 | 264.1234192 | 261.1578824 |
| 264.406232 | 264.4088688 | 264.4030528 | 264.391136 | 264.3845264 | 264.1224192 | 261.1558824 |
| 264.405232 | 264.4088688 | 264.4020528 | 264.390136 | 264.3825264 | 264.1204192 | 261.1548824 |
| 264.403232 | 264.4068688 | 264.4020528 | 264.388136 | 264.3795264 | 264.1174192 | 261.1528824 |
| 264.403232 | 264.4068688 | 264.4030528 | 264.390136 | 264.3805264 | 264.1184192 | 261.1548824 |
| 264.401232 | 264.4058688 | 264.4020528 | 264.390136 | 264.3805264 | 264.1184192 | 261.1528824 |
| 264.401232 | 264.4068688 | 264.4010528 | 264.388136 | 264.3805264 | 264.1184192 | 261.1548824 |

|            |             |             |            |             |             |             |
|------------|-------------|-------------|------------|-------------|-------------|-------------|
| 264.399232 | 264.4038688 | 264.4020528 | 264.388136 | 264.3805264 | 264.1154192 | 261.1528824 |
| 264.399232 | 264.4058688 | 264.4010528 | 264.386136 | 264.3795264 | 264.1184192 | 261.1528824 |
| 264.398232 | 264.4008688 | 264.3990528 | 264.384136 | 264.3765264 | 264.1154192 | 261.1488824 |
| 264.396232 | 264.4028688 | 264.4000528 | 264.385136 | 264.3765264 | 264.1174192 | 261.1498824 |
| 264.398232 | 264.4038688 | 264.4000528 | 264.385136 | 264.3755264 | 264.1154192 | 261.1518824 |
| 264.398232 | 264.4008688 | 264.4000528 | 264.384136 | 264.3765264 | 264.1134192 | 261.1498824 |
| 264.395232 | 264.3998688 | 264.3990528 | 264.382136 | 264.3735264 | 264.1124192 | 261.1488824 |
| 264.395232 | 264.3978688 | 264.3970528 | 264.381136 | 264.3735264 | 264.1124192 | 261.1468824 |
| 264.395232 | 264.3998688 | 264.3970528 | 264.384136 | 264.3745264 | 264.1144192 | 261.1488824 |
| 264.394232 | 264.3998688 | 264.3970528 | 264.382136 | 264.3715264 | 264.1114192 | 261.1488824 |
| 264.396232 | 264.3998688 | 264.3990528 | 264.382136 | 264.3725264 | 264.1124192 | 261.1468824 |
| 264.393232 | 264.3968688 | 264.3950528 | 264.380136 | 264.3705264 | 264.1124192 | 261.1458824 |
| 264.391232 | 264.3978688 | 264.3950528 | 264.382136 | 264.3715264 | 264.1114192 | 261.1448824 |
| 264.395232 | 264.3988688 | 264.3950528 | 264.382136 | 264.3725264 | 264.1104192 | 261.1448824 |
| 264.395232 | 264.3988688 | 264.3950528 | 264.382136 | 264.3725264 | 264.1084192 | 261.1428824 |
| 264.396232 | 264.3988688 | 264.3970528 | 264.383136 | 264.3745264 | 264.1104192 | 261.1448824 |
| 264.395232 | 264.3988688 | 264.3950528 | 264.383136 | 264.3745264 | 264.1124192 | 261.1418824 |
| 264.396232 | 264.4008688 | 264.3930528 | 264.385136 | 264.3765264 | 264.1124192 | 261.1418824 |
| 264.397232 | 264.3978688 | 264.3920528 | 264.382136 | 264.3745264 | 264.1114192 | 261.1388824 |
| 264.400232 | 264.4008688 | 264.3950528 | 264.387136 | 264.3785264 | 264.1144192 | 261.1398824 |
| 264.402232 | 264.4018688 | 264.3950528 | 264.387136 | 264.3795264 | 264.1164192 | 261.1418824 |
| 264.404232 | 264.4038688 | 264.3950528 | 264.388136 | 264.3815264 | 264.1204192 | 261.1418824 |
| 264.403232 | 264.4038688 | 264.3940528 | 264.389136 | 264.3835264 | 264.1194192 | 261.1408824 |
| 264.403232 | 264.4038688 | 264.3940528 | 264.390136 | 264.3875264 | 264.1224192 | 261.1368824 |
| 264.409232 | 264.4078688 | 264.3960528 | 264.394136 | 264.3875264 | 264.1264192 | 261.1378824 |
| 264.407232 | 264.4078688 | 264.3930528 | 264.394136 | 264.3875264 | 264.1284192 | 261.1358824 |
| 264.393232 | 264.4158688 | 264.3970528 | 264.396136 | 264.3915264 | 264.1304192 | 261.1358824 |
| 264.414232 | 264.4118688 | 264.3960528 | 264.398136 | 264.3935264 | 264.1334192 | 261.1358824 |
| NA         | 264.4118688 | 264.3960528 | 264.400136 | 264.3945264 | 264.1354192 | 261.1338824 |
| NA         | 264.4168688 | 264.4130528 | 264.405136 | 264.3985264 | 264.1404192 | 261.1358824 |
| NA         | 264.4168688 | 264.3790528 | 264.405136 | 264.3995264 | 264.1384192 | 261.1338824 |
| NA         | 264.4168688 | 264.3790528 | 264.405136 | 264.3995264 | 264.1434192 | 261.1348824 |
| NA         | 264.4188688 | 264.3780528 | 264.407136 | 264.4005264 | 264.1414192 | 261.1328824 |
| 264.413232 | NA          | 264.3800528 | 264.409136 | 264.4015264 | 264.1454192 | 261.1328824 |
| 264.420232 | NA          | 264.3810528 | 264.409136 | 264.4035264 | 264.1464192 | 261.1328824 |
| 264.422232 | 264.4168688 | 264.3800528 | 264.409136 | 264.4035264 | 264.1434192 | 261.1318824 |
| 264.423232 | 264.4228688 | NA          | 264.410136 | 264.4025264 | 264.1474192 | 261.1338824 |
| 264.425232 | 264.4238688 | 264.3770528 | 264.412136 | 264.4045264 | 264.1464192 | 261.1348824 |
| 264.429232 | 264.4258688 | NA          | 264.415136 | 264.4065264 | 264.1464192 | 261.1358824 |
| 264.429232 | 264.4248688 | 264.3760528 | 264.415136 | 264.4065264 | 264.1464192 | 261.1358824 |
| 264.429232 | 264.4248688 | 264.3790528 | 264.415136 | 264.4065264 | 264.1494192 | 261.1378824 |
| 264.427232 | 264.4258688 | 264.3810528 | 264.413136 | 264.4065264 | 264.1474192 | 261.1378824 |
| 264.430232 | 264.4278688 | 264.4030528 | 264.414136 | 264.4055264 | 264.1494192 | 261.1408824 |
| 264.426232 | 264.4248688 | 264.4010528 | 264.413136 | 264.4045264 | 264.1454192 | 261.1388824 |
| 264.426232 | 264.4248688 | 264.4030528 | 264.391136 | 264.4055264 | 264.1494192 | 261.1418824 |
| 264.426232 | 264.4258688 | 264.4040528 | 264.412136 | 264.4095264 | 264.1474192 | 261.1418824 |
| 264.424232 | 264.4238688 | 264.4040528 | 264.410136 | 264.3915264 | 264.1454192 | 261.1418824 |



|            |             |             |            |             |             |             |
|------------|-------------|-------------|------------|-------------|-------------|-------------|
| 264.425232 | 264.4268688 | 264.4040528 | 264.413136 | 264.4045264 | 264.1444192 | 261.1448824 |
| 264.425232 | 264.4258688 | 264.4040528 | 264.412136 | 264.4035264 | 264.1424192 | 261.1458824 |
| 264.427232 | 264.4278688 | 264.4060528 | 264.411136 | 264.4035264 | 264.1394192 | 261.1468824 |
| 264.423232 | 264.4258688 | 264.4060528 | 264.412136 | 264.4035264 | NA          | 261.1468824 |
| 264.422232 | 264.4258688 | 264.4060528 | 264.409136 | 264.4015264 | 264.1414192 | 261.1478824 |
| 264.423232 | 264.4258688 | 264.4070528 | 264.410136 | 264.4005264 | 264.1364192 | 261.1508824 |
| 264.421232 | 264.4238688 | 264.4030528 | 264.408136 | 264.4005264 | 264.1364192 | 261.1508824 |
| 264.421232 | 264.4228688 | 264.4050528 | 264.405136 | 264.3995264 | 264.1354192 | 261.1498824 |
| 264.422232 | 264.4248688 | 264.4060528 | 264.410136 | 264.4005264 | 264.1364192 | 261.1508824 |
| 264.424232 | 264.4248688 | 264.4080528 | 264.409136 | 264.4015264 | 264.1374192 | 261.1518824 |
| 264.422232 | 264.4238688 | 264.4080528 | 264.409136 | 264.4015264 | 264.1374192 | 261.1538824 |
| 264.420232 | 264.4218688 | 264.4060528 | 264.406136 | 264.4005264 | 264.1344192 | 261.1518824 |
| 264.420232 | 264.4218688 | 264.4060528 | 264.408136 | 264.3985264 | 264.1344192 | 261.1538824 |
| 264.420232 | 264.4248688 | 264.4060528 | 264.408136 | 264.4005264 | 264.1354192 | 261.1538824 |
| 264.421232 | 264.4228688 | 264.4070528 | 264.407136 | 264.3985264 | 264.1374192 | 261.1528824 |
| 264.420232 | 264.4218688 | 264.4040528 | 264.405136 | 264.3985264 | 264.1354192 | 261.1508824 |
| 264.418232 | 264.4228688 | 264.4050528 | 264.406136 | 264.3995264 | 264.1374192 | 261.1548824 |
| 264.417232 | 264.4208688 | 264.4030528 | 264.403136 | 264.3955264 | 264.1324192 | 261.1508824 |
| 264.418232 | 264.4218688 | 264.4060528 | 264.405136 | 264.3965264 | 264.1344192 | 261.1548824 |
| 264.418232 | 264.4198688 | 264.4060528 | 264.406136 | 264.3945264 | 264.1344192 | 261.1518824 |
| 264.419232 | 264.4218688 | 264.4040528 | 264.403136 | 264.3965264 | 264.1324192 | 261.1538824 |
| 264.414232 | 264.4188688 | 264.4050528 | 264.403136 | 264.3935264 | 264.1324192 | 261.1518824 |
| 264.417232 | 264.4188688 | 264.4050528 | 264.402136 | 264.3935264 | 264.1314192 | 261.1518824 |
| 264.417232 | 264.4208688 | 264.4050528 | 264.403136 | 264.3955264 | 264.1314192 | 261.1538824 |
| 264.414232 | 264.4178688 | 264.4030528 | 264.400136 | 264.3925264 | 264.1294192 | 261.1528824 |
| 264.417232 | 264.4178688 | 264.4050528 | 264.403136 | 264.3935264 | 264.1324192 | 261.1518824 |
| 264.419232 | 264.4218688 | 264.4080528 | 264.406136 | 264.3965264 | 264.1304192 | 261.1538824 |
| 264.416232 | 264.4158688 | 264.4030528 | 264.400136 | 264.3925264 | 264.1284192 | 261.1508824 |
| 264.416232 | 264.4188688 | 264.4030528 | 264.404136 | 264.3945264 | 264.1284192 | 261.1508824 |
| 264.414232 | 264.4178688 | 264.4040528 | 264.401136 | 264.3915264 | 264.1284192 | 261.1508824 |
| 264.414232 | 264.4178688 | 264.4040528 | 264.399136 | 264.3915264 | 264.1284192 | 261.1548824 |
| 264.416232 | 264.4178688 | 264.4050528 | 264.402136 | 264.3925264 | 264.1304192 | 261.1508824 |
| 264.413232 | 264.4168688 | 264.4040528 | 264.401136 | 264.3915264 | 264.1274192 | 261.1498824 |
| 264.413232 | 264.4168688 | 264.4040528 | 264.401136 | 264.3915264 | 264.1284192 | 261.1498824 |
| 264.416232 | 264.4198688 | 264.4060528 | 264.404136 | 264.3925264 | 264.1304192 | 261.1528824 |
| 264.415232 | 264.4168688 | 264.4040528 | 264.401136 | 264.3935264 | 264.1284192 | 261.1518824 |
| 264.414232 | 264.4168688 | 264.4050528 | 264.401136 | 264.3905264 | 264.1274192 | 261.1498824 |
| 264.414232 | 264.4148688 | 264.4050528 | 264.400136 | 264.3925264 | 264.1264192 | 261.1508824 |
| 264.414232 | 264.4148688 | 264.4050528 | 264.400136 | 264.3925264 | 264.1264192 | 261.1508824 |
| 264.416232 | 264.4188688 | 264.4030528 | 264.400136 | 264.3925264 | 264.1294192 | 261.1518824 |
| 264.413232 | 264.4168688 | 264.4040528 | 264.400136 | 264.3925264 | 264.1264192 | 261.1458824 |
| 264.414232 | 264.4158688 | 264.4040528 | 264.400136 | 264.3925264 | 264.1284192 | 261.1488824 |
| 264.416232 | 264.4168688 | 264.4050528 | 264.405136 | 264.3955264 | 264.1314192 | 261.1508824 |
| 264.415232 | 264.4158688 | 264.4040528 | 264.404136 | 264.3935264 | 264.1324192 | 261.1478824 |
| 264.418232 | 264.4208688 | 264.4060528 | 264.408136 | 264.3975264 | 264.1324192 | 261.1488824 |
| 264.419232 | 264.4208688 | 264.4030528 | 264.407136 | 264.3965264 | 264.1344192 | 261.1478824 |
| 264.419232 | 264.4208688 | 264.4030528 | 264.407136 | 264.3965264 | 264.1344192 | 261.1478824 |

|            |             |             |            |             |             |             |
|------------|-------------|-------------|------------|-------------|-------------|-------------|
| 264.421232 | 264.4208688 | 264.4030528 | 264.407136 | 264.3985264 | 264.1364192 | 261.1478824 |
| 264.421232 | 264.4208688 | 264.4030528 | 264.406136 | 264.3985264 | 264.1334192 | 261.1468824 |
| 264.422232 | 264.4238688 | 264.4060528 | 264.409136 | 264.4015264 | 264.1384192 | 261.1478824 |
| 264.421232 | 264.4228688 | 264.4050528 | 264.407136 | 264.3985264 | 264.1374192 | 261.1468824 |
| 264.423232 | 264.4228688 | 264.4030528 | 264.411136 | 264.4005264 | 264.1374192 | 261.1448824 |
| 264.423232 | 264.4228688 | 264.4040528 | 264.409136 | 264.4025264 | 264.1394192 | 261.1488824 |
| 264.424232 | 264.4228688 | 264.4040528 | 264.409136 | 264.4015264 | 264.1414192 | 261.1468824 |
| 264.424232 | 264.4258688 | 264.4040528 | 264.411136 | 264.4015264 | 264.1404192 | 261.1478824 |
| 264.426232 | 264.4258688 | 264.4040528 | 264.411136 | 264.4035264 | 264.1404192 | 261.1488824 |
| 264.426232 | 264.4258688 | 264.4080528 | 264.413136 | 264.4065264 | 264.1414192 | 261.1478824 |
| 264.425232 | 264.4248688 | 264.4050528 | 264.412136 | 264.4035264 | 264.1394192 | 261.1458824 |
| 264.425232 | 264.4268688 | 264.4060528 | 264.414136 | 264.4045264 | 264.1394192 | 261.1448824 |
| 264.428232 | 264.4298688 | 264.4080528 | 264.416136 | 264.4085264 | 264.1444192 | 261.1488824 |
| 264.430232 | 264.4288688 | 264.4090528 | 264.417136 | 264.4075264 | 264.1424192 | 261.1478824 |
| 264.427232 | 264.4288688 | 264.4070528 | 264.414136 | 264.4065264 | 264.1434192 | 261.1478824 |
| 264.428232 | 264.4288688 | 264.4080528 | 264.414136 | 264.4085264 | 264.1434192 | 261.1488824 |
| 264.428232 | 264.4288688 | 264.4100528 | 264.416136 | 264.4085264 | 264.1454192 | 261.1498824 |
| 264.428232 | 264.4288688 | 264.4080528 | 264.414136 | 264.4065264 | 264.1464192 | 261.1488824 |
| 264.428232 | 264.4288688 | 264.4060528 | 264.416136 | 264.4065264 | 264.1444192 | 261.1508824 |
| 264.431232 | 264.4318688 | 264.4110528 | 264.417136 | 264.4075264 | 264.1464192 | 261.1528824 |
| 264.427232 | 264.4318688 | 264.4090528 | 264.415136 | 264.4075264 | 264.1454192 | 261.1518824 |
| 264.429232 | 264.4298688 | 264.4110528 | 264.415136 | 264.4075264 | 264.1434192 | 261.1518824 |
| 264.426232 | 264.4268688 | 264.4080528 | 264.414136 | 264.4065264 | 264.1424192 | 261.1498824 |
| 264.427232 | 264.4278688 | 264.4090528 | 264.413136 | 264.4055264 | 264.1394192 | 261.1538824 |
| 264.425232 | 264.4278688 | 264.4090528 | 264.411136 | 264.4035264 | 264.1394192 | 261.1538824 |
| 264.423232 | 264.4278688 | 264.4090528 | 264.411136 | 264.4015264 | 264.1394192 | 261.1548824 |
| 264.422232 | 264.4248688 | 264.4070528 | 264.410136 | 264.4025264 | 264.1374192 | 261.1538824 |
| 264.421232 | 264.4278688 | 264.4090528 | 264.410136 | 264.4015264 | 264.1374192 | 261.1548824 |
| 264.419232 | 264.4258688 | 264.4100528 | 264.408136 | 264.4005264 | 264.1354192 | 261.1568824 |
| 264.418232 | 264.4238688 | 264.4120528 | 264.406136 | 264.3985264 | 264.1354192 | 261.1588824 |
| 264.418232 | 264.4228688 | 264.4090528 | 264.407136 | 264.3985264 | 264.1304192 | 261.1568824 |
| 264.418232 | 264.4228688 | 264.4090528 | 264.403136 | 264.3955264 | 264.1304192 | 261.1568824 |
| 264.416232 | 264.4208688 | 264.4090528 | 264.403136 | 264.3985264 | 264.1304192 | 261.1588824 |
| 264.416232 | 264.4208688 | 264.4110528 | 264.402136 | 264.3975264 | 264.1304192 | 261.1568824 |
| 264.412232 | 264.4188688 | 264.4080528 | 264.401136 | 264.3945264 | 264.1264192 | 261.1558824 |
| 264.413232 | 264.4198688 | 264.4090528 | 264.398136 | 264.3915264 | 264.1264192 | 261.1568824 |
| 264.410232 | 264.4158688 | 264.4080528 | 264.396136 | 264.3895264 | 264.1244192 | 261.1558824 |
| 264.409232 | 264.4158688 | 264.4100528 | 264.398136 | 264.3915264 | 264.1214192 | 261.1578824 |
| 264.409232 | 264.4138688 | 264.4080528 | 264.394136 | 264.3895264 | 264.1224192 | 261.1558824 |
| 264.407232 | 264.4128688 | 264.4050528 | 264.393136 | 264.3865264 | 264.1194192 | 261.1568824 |
| 264.404232 | 264.4118688 | 264.4060528 | 264.392136 | 264.3855264 | 264.1184192 | 261.1548824 |
| 264.404232 | 264.4118688 | 264.4040528 | 264.392136 | 264.3835264 | 264.1204192 | 261.1548824 |
| 264.403232 | 264.4098688 | 264.4040528 | 264.390136 | 264.3835264 | 264.1154192 | 261.1558824 |
| 264.401232 | 264.4088688 | 264.4040528 | 264.389136 | 264.3825264 | 264.1174192 | 261.1538824 |
| 264.402232 | 264.4078688 | 264.4040528 | 264.390136 | 264.3805264 | 264.1144192 | 261.1538824 |
| 264.401232 | 264.4088688 | 264.4040528 | 264.389136 | 264.3785264 | 264.1154192 | 261.1538824 |
| 264.401232 | 264.4078688 | 264.4040528 | 264.389136 | 264.3805264 | 264.1144192 | 261.1538824 |

|            |             |             |            |             |             |             |
|------------|-------------|-------------|------------|-------------|-------------|-------------|
| 264.401232 | 264.4048688 | 264.4040528 | 264.387136 | 264.3785264 | 264.1144192 | 261.1518824 |
| 264.396232 | 264.4028688 | 264.3980528 | 264.383136 | 264.3745264 | 264.1084192 | 261.1508824 |
| 264.396232 | 264.4028688 | 264.4000528 | 264.381136 | 264.3745264 | 264.1104192 | 261.1478824 |
| 264.396232 | 264.4038688 | 264.4010528 | 264.384136 | 264.3745264 | 264.1124192 | 261.1488824 |
| 264.396232 | 264.4028688 | 264.4010528 | 264.383136 | 264.3725264 | 264.1104192 | 261.1488824 |
| 264.395232 | 264.3998688 | 264.4000528 | 264.382136 | 264.3715264 | 264.1074192 | 261.1478824 |
| 264.394232 | 264.3998688 | 264.3990528 | 264.380136 | 264.3695264 | 264.1064192 | 261.1498824 |
| 264.393232 | 264.3988688 | 264.3980528 | 264.379136 | 264.3685264 | 264.1074192 | 261.1438824 |
| 264.394232 | 264.4018688 | 264.4010528 | 264.380136 | 264.3715264 | 264.1104192 | 261.1488824 |
| 264.392232 | 264.3968688 | 264.3980528 | 264.378136 | 264.3655264 | 264.1044192 | 261.1458824 |
| 264.390232 | 264.3978688 | 264.3970528 | 264.376136 | 264.3675264 | 264.1064192 | 261.1448824 |
| 264.391232 | 264.3978688 | 264.3970528 | 264.378136 | 264.3675264 | 264.1064192 | 261.1448824 |
| 264.388232 | 264.3948688 | 264.3960528 | 264.375136 | 264.3655264 | 264.1054192 | 261.1438824 |
| 264.388232 | 264.3948688 | 264.3930528 | 264.374136 | 264.3635264 | 264.1044192 | 261.1438824 |
| 264.389232 | 264.3958688 | 264.3960528 | 264.377136 | 264.3665264 | 264.1074192 | 261.1448824 |
| 264.390232 | 264.3968688 | 264.3970528 | 264.377136 | 264.3655264 | 264.1074192 | 261.1438824 |
| 264.389232 | 264.3948688 | 264.3940528 | 264.377136 | 264.3655264 | 264.1084192 | 261.1438824 |
| 264.389232 | 264.3938688 | 264.3940528 | 264.377136 | 264.3655264 | 264.1104192 | 261.1418824 |
| 264.389232 | 264.3948688 | 264.3940528 | 264.378136 | 264.3655264 | 264.1084192 | 261.1438824 |
| 264.390232 | 264.3928688 | 264.3930528 | 264.378136 | 264.3685264 | 264.1074192 | 261.1398824 |
| 264.392232 | 264.3938688 | 264.3950528 | 264.378136 | 264.3665264 | 264.1074192 | 261.1378824 |
| 264.393232 | 264.3988688 | 264.3950528 | 264.381136 | 264.3735264 | 264.1114192 | 261.1398824 |
| 264.396232 | 264.3988688 | 264.3950528 | 264.383136 | 264.3735264 | 264.1134192 | 261.1398824 |
| 264.397232 | 264.4018688 | 264.3970528 | 264.385136 | 264.3735264 | 264.1154192 | 261.1398824 |
| 264.398232 | 264.4028688 | 264.3940528 | 264.385136 | 264.3765264 | 264.1174192 | 261.1388824 |
| 264.402232 | 264.4028688 | 264.3940528 | 264.387136 | 264.3765264 | 264.1214192 | 261.1388824 |
| 264.404232 | 264.4048688 | 264.3960528 | 264.392136 | 264.3815264 | 264.1244192 | 261.1378824 |
| 264.404232 | 264.4038688 | 264.3920528 | 264.389136 | 264.3815264 | 264.1254192 | 261.1348824 |
| 264.406232 | 264.4068688 | 264.3930528 | 264.393136 | 264.3835264 | 264.1274192 | 261.1338824 |
| 264.408232 | 264.4088688 | 264.3950528 | 264.398136 | 264.3865264 | 264.1314192 | 261.1338824 |
| 264.413232 | 264.4108688 | 264.3940528 | 264.400136 | 264.3875264 | 264.1344192 | 261.1328824 |
| 264.414232 | 264.4138688 | 264.3940528 | 264.398136 | 264.3905264 | 264.1374192 | NA          |
| 264.413232 | 264.4148688 | 264.3920528 | 264.400136 | 264.3915264 | 264.1374192 | 261.1268824 |
| 264.415232 | 264.4148688 | 264.3940528 | 264.402136 | 264.3925264 | 264.1394192 | 261.1308824 |
| 264.415232 | 264.4158688 | 264.3960528 | 264.403136 | 264.3935264 | 264.1404192 | 261.1318824 |
| 264.418232 | 264.4198688 | 264.3980528 | 264.408136 | 264.3965264 | 264.1414192 | 261.1308824 |
| 264.421232 | 264.4198688 | 264.3970528 | 264.407136 | 264.3985264 | 264.1424192 | 261.1298824 |
| 264.423232 | 264.4198688 | 264.3970528 | 264.412136 | 264.4005264 | 264.1464192 | 261.1298824 |
| 264.425232 | 264.4238688 | 264.3980528 | 264.408136 | 264.4025264 | 264.1474192 | 261.1298824 |
| 264.423232 | 264.4238688 | 264.3990528 | 264.409136 | 264.4005264 | 264.1484192 | 261.1308824 |
| 264.421232 | 264.4238688 | 264.4000528 | 264.409136 | 264.4005264 | 264.1484192 | 261.1318824 |
| 264.420232 | 264.4248688 | 264.4010528 | 264.411136 | 264.4025264 | 264.1464192 | 261.1318824 |
| 264.424232 | 264.4258688 | 264.4010528 | 264.409136 | 264.4025264 | 264.1454192 | 261.1338824 |
| 264.423232 | 264.4228688 | 264.4010528 | 264.409136 | 264.4015264 | 264.1434192 | 261.1328824 |
| 264.421232 | 264.4238688 | 264.4000528 | 264.408136 | 264.3995264 | 264.1434192 | 261.1328824 |
| 264.422232 | 264.4258688 | 264.4010528 | 264.411136 | 264.4015264 | 264.1434192 | 261.1338824 |
| 264.420232 | 264.4218688 | 264.3990528 | 264.408136 | 264.4015264 | 264.1414192 | 261.1338824 |

|            |             |             |            |             |             |             |
|------------|-------------|-------------|------------|-------------|-------------|-------------|
| 264.419232 | 264.4238688 | 264.4010528 | 264.408136 | 264.4015264 | 264.1404192 | 261.1358824 |
| 264.423232 | 264.4238688 | 264.4010528 | 264.406136 | 264.4015264 | 264.1424192 | 261.1378824 |
| 264.423232 | 264.4238688 | 264.4000528 | 264.408136 | 264.3995264 | 264.1424192 | 261.1408824 |
| 264.419232 | 264.4238688 | 264.4010528 | 264.406136 | 264.3995264 | 264.1384192 | 261.1408824 |
| 264.419232 | 264.4238688 | 264.4010528 | 264.408136 | 264.3985264 | 264.1384192 | 261.1418824 |
| 264.419232 | 264.4228688 | 264.4000528 | 264.406136 | 264.4005264 | 264.1374192 | 261.1408824 |
| 264.416232 | 264.4228688 | 264.4000528 | 264.405136 | 264.3965264 | 264.1394192 | 261.1438824 |
| 264.419232 | 264.4218688 | 264.4010528 | 264.406136 | 264.3995264 | 264.1364192 | 261.1438824 |
| 264.418232 | 264.4238688 | 264.4030528 | 264.407136 | 264.3995264 | 264.1374192 | 261.1448824 |
| 264.417232 | 264.4208688 | 264.4000528 | 264.404136 | 264.3985264 | 264.1334192 | 261.1458824 |
| 264.417232 | 264.4218688 | 264.4010528 | 264.404136 | 264.3995264 | 264.1364192 | 261.1468824 |
| 264.418232 | 264.4238688 | 264.4020528 | 264.406136 | 264.3995264 | 264.1374192 | 261.1488824 |
| 264.419232 | 264.4248688 | 264.4060528 | 264.409136 | 264.3985264 | 264.1374192 | 261.1498824 |
| 264.418232 | 264.4208688 | 264.4010528 | 264.406136 | 264.3975264 | 264.1344192 | 261.1468824 |
| 264.418232 | 264.4228688 | 264.4040528 | 264.407136 | 264.3985264 | 264.1354192 | 261.1498824 |
| 264.416232 | 264.4218688 | 264.4020528 | 264.402136 | 264.3975264 | 264.1344192 | 261.1468824 |
| 264.416232 | 264.4198688 | 264.4040528 | 264.404136 | 264.3975264 | 264.1334192 | 261.1478824 |
| 264.419232 | 264.4228688 | 264.4050528 | 264.407136 | 264.3995264 | 264.1364192 | 261.1498824 |
| 264.415232 | 264.4198688 | 264.4040528 | 264.405136 | 264.3955264 | 264.1334192 | 261.1478824 |
| 264.417232 | 264.4198688 | 264.4020528 | 264.404136 | 264.3965264 | 264.1314192 | 261.1498824 |
| 264.417232 | 264.4198688 | 264.4030528 | 264.403136 | 264.3965264 | 264.1364192 | 261.1498824 |
| 264.416232 | 264.4188688 | 264.4000528 | 264.401136 | 264.3935264 | 264.1334192 | 261.1478824 |
| 264.416232 | 264.4188688 | 264.4000528 | 264.402136 | 264.3955264 | 264.1314192 | 261.1478824 |
| 264.416232 | 264.4198688 | 264.4020528 | 264.404136 | 264.3935264 | 264.1314192 | 261.1478824 |
| 264.416232 | 264.4198688 | 264.4020528 | 264.402136 | 264.3955264 | 264.1334192 | 261.1478824 |
| 264.414232 | 264.4188688 | 264.4020528 | 264.401136 | 264.3935264 | 264.1334192 | 261.1468824 |
| 264.415232 | 264.4188688 | 264.4020528 | 264.404136 | 264.3955264 | 264.1334192 | 261.1498824 |
| 264.415232 | 264.4168688 | 264.4020528 | 264.402136 | 264.3955264 | 264.1334192 | 261.1498824 |
| 264.414232 | 264.4168688 | 264.4000528 | 264.402136 | 264.3935264 | 264.1314192 | 261.1478824 |
| 264.413232 | 264.4138688 | 264.4010528 | 264.401136 | 264.3945264 | 264.1304192 | 261.1448824 |
| 264.414232 | 264.4168688 | 264.4020528 | 264.400136 | 264.3965264 | 264.1314192 | 261.1498824 |
| 264.416232 | 264.4168688 | 264.4000528 | 264.401136 | 264.3955264 | 264.1314192 | 261.1498824 |
| 264.413232 | 264.4158688 | 264.3990528 | 264.398136 | 264.3925264 | 264.1284192 | 261.1468824 |
| 264.414232 | 264.4168688 | 264.4020528 | 264.399136 | 264.3935264 | 264.1284192 | 261.1518824 |
| 264.411232 | 264.4158688 | 264.4010528 | 264.398136 | 264.3905264 | 264.1284192 | 261.1488824 |
| 264.411232 | 264.4158688 | 264.3990528 | 264.398136 | 264.3925264 | 264.1274192 | 261.1458824 |
| 264.411232 | 264.4138688 | 264.3970528 | 264.396136 | 264.3905264 | 264.1254192 | 261.1458824 |
| 264.411232 | 264.4158688 | 264.3990528 | 264.396136 | 264.3905264 | 264.1274192 | 261.1488824 |
| 264.413232 | 264.4138688 | 264.3990528 | 264.398136 | 264.3925264 | 264.1284192 | 261.1458824 |
| 264.415232 | 264.4158688 | 264.4010528 | 264.398136 | 264.3925264 | 264.1284192 | 261.1488824 |
| 264.415232 | 264.4178688 | 264.4010528 | 264.399136 | 264.3945264 | 264.1304192 | 261.1488824 |
| 264.415232 | 264.4188688 | 264.4030528 | 264.401136 | 264.3945264 | 264.1284192 | 261.1488824 |
| 264.412232 | 264.4158688 | 264.4000528 | 264.398136 | 264.3925264 | 264.1314192 | 261.1508824 |
| 264.412232 | 264.4148688 | 264.4000528 | 264.397136 | 264.3895264 | 264.1314192 | 261.1478824 |
| 264.412232 | 264.4158688 | 264.3990528 | 264.397136 | 264.3935264 | 264.1304192 | 261.1478824 |
| 264.414232 | 264.4158688 | 264.4000528 | 264.400136 | 264.3945264 | 264.1304192 | 261.1478824 |
| 264.414232 | 264.4178688 | 264.4000528 | 264.398136 | 264.3935264 | 264.1324192 | 261.1488824 |

|            |             |             |            |             |             |             |
|------------|-------------|-------------|------------|-------------|-------------|-------------|
| 264.416232 | 264.4178688 | 264.4020528 | 264.400136 | 264.3945264 | 264.1334192 | 261.1488824 |
| 264.417232 | 264.4178688 | 264.3990528 | 264.400136 | 264.3955264 | 264.1324192 | 261.1498824 |
| 264.415232 | 264.4168688 | 264.3990528 | 264.399136 | 264.3955264 | 264.1314192 | 261.1468824 |
| 264.418232 | 264.4198688 | 264.4020528 | 264.403136 | 264.3985264 | 264.1354192 | 261.1488824 |
| 264.416232 | 264.4198688 | 264.4020528 | 264.405136 | 264.3985264 | 264.1344192 | 261.1498824 |
| 264.417232 | 264.4198688 | 264.4010528 | 264.405136 | 264.3975264 | 264.1344192 | 261.1468824 |
| 264.419232 | 264.4218688 | 264.4010528 | 264.406136 | 264.3995264 | 264.1364192 | 261.1488824 |
| 264.419232 | 264.4228688 | 264.4000528 | 264.406136 | 264.3995264 | 264.1384192 | 261.1468824 |
| 264.418232 | 264.4218688 | 264.4000528 | 264.406136 | 264.3995264 | 264.1394192 | 261.1468824 |
| 264.419232 | 264.4218688 | 264.4000528 | 264.406136 | 264.3995264 | 264.1374192 | 261.1468824 |
| 264.423232 | 264.4228688 | 264.4020528 | 264.409136 | 264.4025264 | 264.1384192 | 261.1488824 |
| 264.424232 | 264.4268688 | 264.4050528 | 264.412136 | 264.4025264 | 264.1424192 | 261.1488824 |
| 264.422232 | 264.4238688 | 264.4040528 | 264.408136 | 264.4015264 | 264.1414192 | 261.1478824 |
| 264.425232 | 264.4268688 | 264.4040528 | 264.412136 | 264.4045264 | 264.1444192 | 261.1508824 |
| 264.424232 | 264.4258688 | 264.4030528 | 264.410136 | 264.4035264 | 264.1404192 | 261.1478824 |
| 264.426232 | 264.4288688 | 264.4050528 | 264.411136 | 264.4035264 | 264.1414192 | 261.1508824 |
| 264.424232 | 264.4258688 | 264.4030528 | 264.412136 | 264.4045264 | 264.1434192 | 261.1498824 |
| 264.424232 | 264.4258688 | 264.4030528 | 264.412136 | 264.4045264 | 264.1434192 | 261.1478824 |
| 264.426232 | 264.4268688 | 264.4030528 | 264.410136 | 264.4045264 | 264.1434192 | 261.1498824 |
| 264.426232 | 264.4288688 | 264.4060528 | 264.413136 | 264.4055264 | 264.1434192 | 261.1508824 |
| 264.426232 | 264.4288688 | 264.4070528 | 264.413136 | 264.4045264 | 264.1424192 | 261.1498824 |
| 264.426232 | 264.4268688 | 264.4080528 | 264.412136 | 264.4045264 | 264.1424192 | 261.1508824 |
| 264.425232 | 264.4278688 | 264.4070528 | 264.410136 | 264.4045264 | 264.1424192 | 261.1498824 |
| 264.423232 | 264.4248688 | 264.4040528 | 264.409136 | 264.3995264 | 264.1394192 | 261.1498824 |
| 264.423232 | 264.4248688 | 264.4050528 | 264.407136 | 264.4035264 | 264.1414192 | 261.1498824 |
| 264.425232 | 264.4258688 | 264.4060528 | 264.407136 | 264.4035264 | 264.1394192 | 261.1528824 |
| 264.422232 | 264.4248688 | 264.4060528 | 264.409136 | 264.4015264 | 264.1374192 | 261.1518824 |
| 264.423232 | 264.4278688 | 264.4070528 | 264.410136 | 264.4035264 | 264.1394192 | 261.1548824 |
| 264.422232 | 264.4258688 | 264.4080528 | 264.407136 | 264.4035264 | 264.1374192 | 261.1518824 |
| 264.422232 | 264.4258688 | 264.4070528 | 264.409136 | 264.4015264 | 264.1394192 | 261.1548824 |
| 264.420232 | 264.4258688 | 264.4080528 | 264.406136 | 264.4005264 | 264.1364192 | 261.1538824 |
| 264.419232 | 264.4248688 | 264.4060528 | 264.406136 | 264.3985264 | 264.1384192 | 261.1538824 |
| 264.419232 | 264.4248688 | 264.4080528 | 264.404136 | 264.3985264 | 264.1314192 | 261.1558824 |
| 264.415232 | 264.4228688 | 264.4060528 | 264.401136 | 264.3955264 | 264.1334192 | 261.1538824 |
| 264.417232 | 264.4218688 | 264.4080528 | 264.403136 | 264.3975264 | 264.1334192 | 261.1538824 |
| 264.414232 | 264.4208688 | 264.4050528 | 264.400136 | 264.3945264 | 264.1284192 | 261.1538824 |
| 264.414232 | 264.4198688 | 264.4090528 | 264.400136 | 264.3945264 | 264.1304192 | 261.1558824 |
| 264.413232 | 264.4188688 | 264.4050528 | 264.397136 | 264.3905264 | 264.1274192 | 261.1538824 |
| 264.409232 | 264.4178688 | 264.4070528 | 264.398136 | 264.3935264 | 264.1254192 | 261.1548824 |
| 264.408232 | 264.4128688 | 264.4050528 | 264.393136 | 264.3865264 | 264.1224192 | 261.1528824 |
| 264.411232 | 264.4148688 | 264.4070528 | 264.395136 | 264.3895264 | 264.1254192 | 261.1558824 |
| 264.406232 | 264.4148688 | 264.4050528 | 264.392136 | 264.3865264 | 264.1244192 | 261.1548824 |
| 264.404232 | 264.4108688 | 264.4040528 | 264.389136 | 264.3845264 | 264.1224192 | 261.1548824 |
| 264.405232 | 264.4108688 | 264.4060528 | 264.390136 | 264.3845264 | 264.1234192 | 261.1578824 |
| 264.405232 | 264.4108688 | 264.4050528 | 264.390136 | 264.3845264 | 264.1194192 | 261.1578824 |
| 264.404232 | 264.4128688 | 264.4050528 | 264.389136 | 264.3845264 | 264.1184192 | 261.1558824 |
| 264.405232 | 264.4108688 | 264.4050528 | 264.390136 | 264.3825264 | 264.1174192 | 261.1568824 |

|            |             |             |            |             |             |             |
|------------|-------------|-------------|------------|-------------|-------------|-------------|
| 264.402232 | 264.4098688 | 264.4040528 | 264.385136 | 264.3805264 | 264.1164192 | 261.1548824 |
| 264.400232 | 264.4078688 | 264.4040528 | 264.385136 | 264.3805264 | 264.1144192 | 261.1548824 |
| 264.400232 | 264.4068688 | 264.4050528 | 264.385136 | 264.3795264 | 264.1144192 | 261.1558824 |
| 264.397232 | 264.4048688 | 264.4040528 | 264.382136 | 264.3755264 | 264.1114192 | 261.1548824 |
| 264.397232 | 264.4038688 | 264.4010528 | 264.382136 | 264.3765264 | 264.1114192 | 261.1508824 |
| 264.398232 | 264.4048688 | 264.4040528 | 264.384136 | 264.3775264 | 264.1124192 | 261.1538824 |
| 264.395232 | 264.4038688 | 264.4020528 | 264.382136 | 264.3755264 | 264.1114192 | 261.1508824 |
| 264.395232 | 264.4018688 | 264.4020528 | 264.379136 | 264.3745264 | 264.1124192 | 261.1528824 |
| 264.396232 | 264.4038688 | 264.4040528 | 264.382136 | 264.3755264 | 264.1144192 | 261.1528824 |
| 264.395232 | 264.4008688 | 264.4020528 | 264.377136 | 264.3725264 | 264.1124192 | 261.1508824 |
| 264.393232 | 264.4018688 | 264.4000528 | 264.379136 | 264.3725264 | 264.1124192 | 261.1498824 |
| 264.389232 | 264.3978688 | 264.3980528 | 264.375136 | 264.3695264 | 264.1084192 | 261.1468824 |
| 264.392232 | 264.3988688 | 264.4010528 | 264.376136 | 264.3695264 | 264.1104192 | 261.1488824 |
| 264.393232 | 264.3978688 | 264.3980528 | 264.375136 | 264.3695264 | 264.1064192 | 261.1468824 |
| 264.389232 | 264.3958688 | 264.3970528 | 264.373136 | 264.3685264 | 264.1074192 | 261.1458824 |
| 264.391232 | 264.3958688 | 264.3960528 | 264.375136 | 264.3685264 | 264.1064192 | 261.1458824 |
| 264.390232 | 264.3978688 | 264.3980528 | 264.376136 | 264.3685264 | 264.1064192 | 261.1468824 |
| 264.391232 | 264.3948688 | 264.3940528 | 264.375136 | 264.3665264 | 264.1064192 | 261.1438824 |
| 264.390232 | 264.3978688 | 264.3980528 | 264.375136 | 264.3665264 | 264.1104192 | 261.1448824 |
| 264.390232 | 264.3948688 | 264.3960528 | 264.373136 | 264.3685264 | 264.1064192 | 261.1438824 |
| 264.390232 | 264.3948688 | 264.3940528 | 264.375136 | 264.3665264 | 264.1064192 | 261.1438824 |
| 264.390232 | 264.3928688 | 264.3940528 | 264.373136 | 264.3665264 | 264.1064192 | 261.1398824 |
| 264.393232 | 264.3958688 | 264.3950528 | 264.377136 | 264.3695264 | 264.1094192 | 261.1418824 |
| 264.396232 | 264.3968688 | 264.3970528 | 264.377136 | 264.3705264 | 264.1104192 | 261.1428824 |
| 264.395232 | 264.3988688 | 264.3950528 | 264.379136 | 264.3705264 | 264.1104192 | 261.1408824 |
| 264.399232 | 264.4018688 | 264.3960528 | 264.382136 | 264.3765264 | 264.1134192 | 261.1408824 |
| 264.399232 | 264.4018688 | 264.3940528 | 264.382136 | 264.3765264 | 264.1154192 | 261.1388824 |
| 264.404232 | 264.4048688 | 264.3970528 | 264.388136 | 264.3815264 | 264.1204192 | 261.1418824 |
| 264.404232 | 264.4058688 | 264.3960528 | 264.388136 | 264.3835264 | 264.1204192 | 261.1408824 |
| 264.404232 | 264.4078688 | 264.3940528 | 264.391136 | 264.3855264 | 264.1264192 | 261.1378824 |
| 264.408232 | 264.4078688 | 264.3940528 | 264.393136 | 264.3875264 | 264.1284192 | 261.1378824 |
| 264.413232 | 264.4138688 | 264.3970528 | 264.399136 | 264.3925264 | 264.1314192 | 261.1358824 |
| 264.414232 | 264.4128688 | 264.3960528 | 264.398136 | 264.3905264 | 264.1314192 | 261.1348824 |
| 264.417232 | 264.4158688 | 264.3980528 | 264.400136 | 264.3935264 | 264.1334192 | 261.1348824 |
| 264.419232 | 264.4168688 | 264.4000528 | 264.403136 | 264.3975264 | 264.1374192 | 261.1348824 |
| 264.418232 | 264.4158688 | 264.3970528 | 264.402136 | 264.3945264 | 264.1374192 | 261.1318824 |
| 264.419232 | 264.4188688 | 264.3980528 | 264.404136 | 264.3995264 | 264.1404192 | 261.1308824 |
| 264.417232 | 264.4188688 | 264.3980528 | 264.404136 | 264.3955264 | 264.1404192 | 261.1298824 |
| 264.422232 | 264.4198688 | 264.3990528 | 264.406136 | 264.4005264 | 264.1404192 | 261.1298824 |
| 264.422232 | 264.4238688 | 264.3990528 | 264.409136 | 264.4025264 | 264.1404192 | 261.1298824 |
| 264.427232 | 264.4258688 | 264.4020528 | 264.412136 | 264.4055264 | 264.1454192 | 261.1328824 |
| 264.425232 | 264.4248688 | 264.4000528 | 264.412136 | 264.4055264 | 264.1434192 | 261.1308824 |
| 264.428232 | 264.4278688 | 264.4020528 | 264.413136 | 264.4065264 | 264.1444192 | 261.1338824 |
| 264.428232 | 264.4258688 | 264.4020528 | 264.412136 | 264.4065264 | 264.1444192 | 261.1318824 |
| 264.426232 | 264.4258688 | 264.4030528 | 264.411136 | 264.4055264 | 264.1454192 | 261.1318824 |
| 264.427232 | 264.4268688 | 264.4030528 | 264.413136 | 264.4075264 | 264.1434192 | 261.1328824 |
| 264.427232 | 264.4268688 | 264.4020528 | 264.413136 | 264.4085264 | 264.1434192 | 261.1358824 |

|            |             |             |            |             |             |             |
|------------|-------------|-------------|------------|-------------|-------------|-------------|
| 264.427232 | 264.4258688 | 264.4010528 | 264.413136 | 264.4055264 | 264.1394192 | 261.1328824 |
| 264.426232 | 264.4268688 | 264.4030528 | 264.412136 | 264.4065264 | 264.1404192 | 261.1378824 |
| 264.429232 | 264.4298688 | 264.4030528 | 264.414136 | 264.4075264 | 264.1404192 | 261.1388824 |
| 264.429232 | 264.4298688 | 264.4060528 | 264.415136 | 264.4075264 | 264.1414192 | 261.1398824 |
| 264.427232 | 264.4278688 | 264.4060528 | 264.413136 | 264.4065264 | 264.1414192 | 261.1398824 |
| 264.428232 | 264.4288688 | 264.4050528 | 264.414136 | 264.4065264 | 264.1384192 | 261.1438824 |
| 264.426232 | 264.4268688 | 264.4050528 | 264.412136 | 264.4065264 | 264.1364192 | 261.1428824 |
| 264.427232 | 264.4288688 | 264.4070528 | 264.414136 | 264.4055264 | 264.1394192 | 261.1438824 |
| 264.425232 | 264.4288688 | 264.4070528 | 264.410136 | 264.4035264 | 264.1374192 | 261.1438824 |
| 264.425232 | 264.4278688 | 264.4100528 | 264.411136 | 264.4065264 | 264.1374192 | 261.1458824 |
| 264.425232 | 264.4278688 | 264.4090528 | 264.409136 | 264.4045264 | 264.1334192 | 261.1478824 |
| 264.424232 | 264.4258688 | 264.4090528 | 264.411136 | 264.4055264 | 264.1344192 | 261.1468824 |
| 264.424232 | 264.4258688 | 264.4070528 | 264.410136 | 264.4035264 | 264.1324192 | 261.1498824 |
| 264.425232 | 264.4248688 | 264.4080528 | 264.412136 | 264.4065264 | 264.1314192 | 261.1498824 |
| 264.421232 | 264.4248688 | 264.4060528 | 264.408136 | 264.4025264 | 264.1294192 | 261.1458824 |
| 264.423232 | 264.4258688 | 264.4080528 | 264.409136 | 264.4035264 | 264.1324192 | 261.1488824 |
| 264.425232 | 264.4268688 | 264.4100528 | 264.413136 | 264.4035264 | 264.1324192 | 261.1498824 |
| 264.424232 | 264.4258688 | 264.4070528 | 264.410136 | 264.4035264 | 264.1344192 | 261.1498824 |
| 264.425232 | 264.4268688 | 264.4100528 | 264.413136 | 264.4035264 | 264.1304192 | 261.1508824 |
| 264.424232 | 264.4268688 | 264.4070528 | 264.412136 | 264.4045264 | 264.1314192 | 261.1508824 |
| 264.425232 | 264.4278688 | 264.4080528 | 264.412136 | 264.4055264 | 264.1324192 | 261.1518824 |
| 264.424232 | 264.4278688 | 264.4090528 | 264.413136 | 264.4065264 | 264.1314192 | 261.1528824 |
| 264.424232 | 264.4268688 | 264.4090528 | 264.411136 | 264.4045264 | 264.1304192 | 261.1508824 |
| 264.423232 | 264.4288688 | 264.4080528 | 264.412136 | 264.4055264 | 264.1314192 | 261.1518824 |
| 264.424232 | 264.4268688 | 264.4080528 | 264.411136 | 264.4035264 | 264.1294192 | 261.1518824 |
| 264.423232 | 264.4258688 | 264.4090528 | 264.412136 | 264.4045264 | 264.1304192 | 261.1528824 |
| 264.423232 | 264.4258688 | 264.4100528 | 264.410136 | 264.4025264 | 264.1284192 | 261.1548824 |
| 264.423232 | 264.4258688 | 264.4080528 | 264.408136 | 264.4045264 | 264.1294192 | 261.1528824 |
| 264.422232 | 264.4258688 | 264.4080528 | 264.408136 | 264.4005264 | 264.1294192 | 261.1528824 |
| 264.422232 | 264.4238688 | 264.4090528 | 264.409136 | 264.4015264 | 264.1294192 | 261.1528824 |
| 264.420232 | 264.4258688 | 264.4090528 | 264.408136 | 264.4035264 | 264.1284192 | 261.1508824 |
| 264.420232 | 264.4238688 | 264.4050528 | 264.406136 | 264.3975264 | 264.1234192 | 261.1508824 |
| 264.422232 | 264.4268688 | 264.4060528 | 264.408136 | 264.4025264 | 264.1294192 | 261.1548824 |
| 264.424232 | 264.4248688 | 264.4080528 | 264.408136 | 264.4005264 | 264.1274192 | 261.1548824 |
| 264.418232 | 264.4238688 | 264.4080528 | 264.407136 | 264.4005264 | 264.1294192 | 261.1528824 |
| 264.419232 | 264.4248688 | 264.4070528 | 264.406136 | 264.4015264 | 264.1284192 | 261.1528824 |
| 264.420232 | 264.4228688 | 264.4060528 | 264.407136 | 264.3995264 | 264.1234192 | 261.1518824 |
| 264.419232 | 264.4238688 | 264.4070528 | 264.407136 | 264.4015264 | 264.1284192 | 261.1528824 |
| 264.416232 | 264.4208688 | 264.4050528 | 264.402136 | 264.3955264 | 264.1244192 | 261.1518824 |
| 264.417232 | 264.4218688 | 264.4070528 | 264.407136 | 264.3985264 | 264.1244192 | 261.1528824 |
| 264.420232 | 264.4238688 | 264.4060528 | 264.407136 | 264.3995264 | 264.1264192 | 261.1528824 |
| 264.418232 | 264.4218688 | 264.4040528 | 264.406136 | 264.3985264 | 264.1264192 | 261.1528824 |
| 264.423232 | 264.4248688 | 264.4070528 | 264.411136 | 264.4035264 | 264.1284192 | 261.1548824 |
| 264.420232 | 264.4248688 | 264.4050528 | 264.409136 | 264.4035264 | 264.1294192 | 261.1538824 |
| 264.424232 | 264.4238688 | 264.4050528 | 264.409136 | 264.4035264 | 264.1294192 | 261.1528824 |
| 264.423232 | 264.4258688 | 264.4060528 | 264.410136 | 264.4025264 | 264.1324192 | 261.1548824 |
| 264.424232 | 264.4268688 | 264.4070528 | 264.411136 | 264.4035264 | 264.1314192 | 261.1558824 |

|            |             |             |            |             |             |             |
|------------|-------------|-------------|------------|-------------|-------------|-------------|
| 264.424232 | 264.4258688 | 264.4070528 | 264.409136 | 264.4035264 | 264.1294192 | 261.1538824 |
| 264.423232 | 264.4238688 | 264.4060528 | 264.410136 | 264.4045264 | 264.1284192 | 261.1528824 |
| 264.424232 | 264.4268688 | 264.4070528 | 264.408136 | 264.4035264 | 264.1314192 | 261.1538824 |
| 264.424232 | 264.4268688 | 264.4070528 | 264.411136 | 264.4055264 | 264.1314192 | 261.1538824 |
| 264.425232 | 264.4268688 | 264.4070528 | 264.411136 | 264.4055264 | 264.1314192 | 261.1528824 |
| 264.423232 | 264.4268688 | 264.4060528 | 264.411136 | 264.4045264 | 264.1314192 | 261.1508824 |
| 264.424232 | 264.4258688 | 264.4070528 | 264.410136 | 264.4065264 | 264.1314192 | 261.1498824 |
| 264.426232 | 264.4278688 | 264.4070528 | 264.412136 | 264.4065264 | 264.1304192 | 261.1498824 |
| 264.424232 | 264.4278688 | 264.4090528 | 264.412136 | 264.4065264 | 264.1314192 | 261.1538824 |
| 264.426232 | 264.4278688 | 264.4090528 | 264.413136 | 264.4055264 | 264.1294192 | 261.1548824 |
| 264.426232 | 264.4278688 | 264.4090528 | 264.410136 | 264.4065264 | 264.1304192 | 261.1498824 |
| 264.425232 | 264.4258688 | 264.4080528 | 264.410136 | 264.4065264 | 264.1304192 | 261.1518824 |
| 264.424232 | 264.4258688 | 264.4090528 | 264.412136 | 264.4065264 | 264.1314192 | 261.1498824 |
| 264.426232 | 264.4278688 | 264.4090528 | 264.412136 | 264.4065264 | 264.1304192 | 261.1498824 |
| 264.426232 | 264.4278688 | 264.4090528 | 264.412136 | 264.4045264 | 264.1314192 | 261.1518824 |
| 264.425232 | 264.4248688 | 264.4060528 | 264.410136 | 264.4045264 | 264.1304192 | 261.1508824 |
| 264.425232 | 264.4258688 | 264.4080528 | 264.410136 | 264.4045264 | 264.1344192 | 261.1508824 |
| 264.428232 | 264.4278688 | 264.4070528 | 264.413136 | 264.4055264 | 264.1354192 | 261.1528824 |
| 264.427232 | 264.4268688 | 264.4080528 | 264.411136 | 264.4055264 | 264.1314192 | 261.1528824 |
| 264.427232 | 264.4288688 | 264.4080528 | 264.411136 | 264.4055264 | 264.1344192 | 261.1528824 |
| 264.425232 | 264.4268688 | 264.4090528 | 264.411136 | 264.4055264 | 264.1314192 | 261.1518824 |
| 264.424232 | 264.4258688 | 264.4090528 | 264.410136 | 264.4045264 | 264.1314192 | 261.1518824 |
| 264.423232 | 264.4248688 | 264.4080528 | 264.407136 | 264.4035264 | 264.1304192 | 261.1518824 |
| 264.424232 | 264.4268688 | 264.4100528 | 264.408136 | 264.4055264 | 264.1274192 | 261.1518824 |
| 264.427232 | 264.4288688 | 264.4110528 | 264.411136 | 264.4065264 | 264.1324192 | 261.1548824 |
| 264.424232 | 264.4248688 | 264.4090528 | 264.409136 | 264.4025264 | 264.1304192 | 261.1528824 |
| 264.426232 | 264.4278688 | 264.4110528 | 264.411136 | 264.4065264 | 264.1334192 | 261.1538824 |
| 264.424232 | 264.4268688 | 264.4090528 | 264.409136 | 264.4045264 | 264.1314192 | 261.1558824 |
| 264.425232 | 264.4248688 | 264.4100528 | 264.409136 | 264.4045264 | 264.1344192 | 261.1518824 |
| 264.423232 | 264.4248688 | 264.4080528 | 264.408136 | 264.4035264 | 264.1284192 | 261.1538824 |
| 264.424232 | 264.4258688 | 264.4110528 | 264.410136 | 264.4035264 | 264.1304192 | 261.1528824 |
| 264.422232 | 264.4248688 | 264.4090528 | 264.408136 | 264.4035264 | 264.1284192 | 261.1558824 |
| 264.423232 | 264.4268688 | 264.4100528 | 264.409136 | 264.4045264 | 264.1294192 | 261.1558824 |
| 264.424232 | 264.4248688 | 264.4110528 | 264.409136 | 264.4015264 | 264.1304192 | 261.1568824 |
| 264.422232 | 264.4268688 | 264.4110528 | 264.407136 | 264.4015264 | 264.1294192 | 261.1548824 |
| 264.420232 | 264.4238688 | 264.4090528 | 264.405136 | 264.3995264 | 264.1274192 | 261.1568824 |
| 264.422232 | 264.4238688 | 264.4090528 | 264.405136 | 264.3995264 | 264.1274192 | 261.1568824 |
| 264.422232 | 264.4258688 | 264.4110528 | 264.406136 | 264.3985264 | 264.1284192 | 261.1578824 |
| 264.417232 | 264.4208688 | 264.4110528 | 264.404136 | 264.3965264 | 264.1264192 | 261.1558824 |
| 264.417232 | 264.4208688 | 264.4090528 | 264.403136 | 264.3965264 | 264.1214192 | 261.1528824 |
| 264.416232 | 264.4208688 | 264.4100528 | 264.402136 | 264.3945264 | 264.1234192 | 261.1558824 |
| 264.416232 | 264.4188688 | 264.4100528 | 264.402136 | 264.3945264 | 264.1214192 | 261.1548824 |
| 264.413232 | 264.4168688 | 264.4100528 | 264.399136 | 264.3935264 | 264.1194192 | 261.1538824 |
| 264.411232 | 264.4168688 | 264.4090528 | 264.397136 | 264.3895264 | 264.1184192 | 261.1548824 |
| 264.413232 | 264.4168688 | 264.4090528 | 264.398136 | 264.3935264 | 264.1204192 | 261.1548824 |
| 264.409232 | 264.4158688 | 264.4090528 | 264.393136 | 264.3885264 | 264.1184192 | 261.1548824 |
| 264.410232 | 264.4148688 | 264.4090528 | 264.396136 | 264.3905264 | 264.1164192 | 261.1558824 |



|            |             |             |            |             |             |             |
|------------|-------------|-------------|------------|-------------|-------------|-------------|
| 264.407232 | 264.4138688 | 264.4070528 | 264.393136 | 264.3855264 | 264.1164192 | 261.1538824 |
| 264.405232 | 264.4138688 | 264.4090528 | 264.391136 | 264.3845264 | 264.1144192 | 261.1538824 |
| 264.405232 | 264.4108688 | 264.4060528 | 264.391136 | 264.3835264 | 264.1124192 | 261.1538824 |
| 264.401232 | 264.4078688 | 264.4050528 | 264.388136 | 264.3825264 | 264.1104192 | 261.1538824 |
| 264.405232 | 264.4088688 | 264.4060528 | 264.388136 | 264.3825264 | 264.1124192 | 261.1538824 |
| 264.403232 | 264.4088688 | 264.4060528 | 264.388136 | 264.3825264 | 264.1124192 | 261.1508824 |
| 264.402232 | 264.4068688 | 264.4060528 | 264.389136 | 264.3835264 | 264.1104192 | 261.1558824 |
| 264.401232 | 264.4058688 | 264.4040528 | 264.384136 | 264.3805264 | 264.1084192 | 261.1538824 |
| 264.398232 | 264.4058688 | 264.4020528 | 264.382136 | 264.3755264 | 264.1074192 | 261.1508824 |
| 264.396232 | 264.4028688 | 264.4030528 | 264.382136 | 264.3735264 | 264.1054192 | 261.1528824 |
| 264.396232 | 264.4028688 | 264.4040528 | 264.382136 | 264.3745264 | 264.1054192 | 261.1518824 |
| 264.395232 | 264.4028688 | 264.4010528 | 264.382136 | 264.3745264 | 264.1024192 | 261.1498824 |
| 264.397232 | 264.4048688 | 264.4020528 | 264.381136 | 264.3745264 | 264.1024192 | 261.1498824 |
| 264.396232 | 264.3998688 | 264.4010528 | 264.379136 | 264.3715264 | 264.1034192 | 261.1518824 |
| 264.391232 | 264.3988688 | 264.3970528 | 264.377136 | 264.3695264 | 264.1004192 | 261.1478824 |
| 264.393232 | 264.3988688 | 264.4000528 | 264.377136 | 264.3705264 | 264.1004192 | 261.1478824 |
| 264.392232 | 264.3998688 | 264.3990528 | 264.375136 | 264.3695264 | 264.1014192 | 261.1468824 |
| 264.390232 | 264.3978688 | 264.3990528 | 264.376136 | 264.3695264 | 264.0994192 | 261.1478824 |
| 264.391232 | 264.3948688 | 264.3980528 | 264.374136 | 264.3685264 | 264.0984192 | 261.1468824 |
| 264.392232 | 264.3968688 | 264.3980528 | 264.374136 | 264.3695264 | 264.1014192 | 261.1468824 |
| 264.393232 | 264.3968688 | 264.3980528 | 264.376136 | 264.3685264 | 264.1004192 | 261.1448824 |
| 264.391232 | 264.3968688 | 264.3960528 | 264.374136 | 264.3685264 | 264.1024192 | 261.1468824 |
| 264.390232 | 264.3938688 | 264.3970528 | 264.372136 | 264.3695264 | 264.1014192 | 261.1438824 |
| 264.387232 | 264.3928688 | 264.3960528 | 264.372136 | 264.3665264 | 264.0984192 | 261.1428824 |
| 264.387232 | 264.3928688 | 264.3960528 | 264.372136 | 264.3665264 | 264.1004192 | 261.1428824 |
| 264.388232 | 264.3928688 | 264.3930528 | 264.372136 | 264.3665264 | 264.0994192 | 261.1398824 |
| 264.389232 | 264.3918688 | 264.3940528 | 264.373136 | 264.3655264 | 264.0994192 | 261.1408824 |
| 264.392232 | 264.3948688 | 264.3940528 | 264.374136 | 264.3655264 | 264.1034192 | 261.1388824 |
| 264.389232 | 264.3938688 | 264.3920528 | 264.373136 | 264.3665264 | 264.1024192 | 261.1388824 |
| 264.391232 | 264.3948688 | 264.3950528 | 264.375136 | 264.3685264 | 264.1024192 | 261.1408824 |
| 264.389232 | 264.3938688 | 264.3920528 | 264.375136 | 264.3685264 | 264.1014192 | 261.1368824 |
| 264.391232 | 264.3948688 | 264.3910528 | 264.376136 | 264.3695264 | 264.1024192 | 261.1368824 |
| 264.393232 | 264.3948688 | 264.3910528 | 264.376136 | 264.3695264 | 264.1044192 | 261.1368824 |
| 264.396232 | 264.3948688 | 264.3930528 | 264.378136 | 264.3705264 | 264.1064192 | 261.1358824 |
| 264.396232 | 264.3948688 | 264.3900528 | 264.380136 | 264.3705264 | 264.1054192 | 261.1358824 |
| 264.397232 | 264.3968688 | 264.3910528 | 264.382136 | 264.3725264 | 264.1094192 | 261.1348824 |
| 264.397232 | 264.3968688 | 264.3930528 | 264.382136 | 264.3745264 | 264.1114192 | 261.1348824 |
| 264.398232 | 264.3978688 | 264.3880528 | 264.382136 | 264.3755264 | 264.1104192 | 261.1338824 |
| 264.398232 | 264.3988688 | 264.3910528 | 264.383136 | 264.3755264 | 264.1114192 | 261.1328824 |
| 264.399232 | 264.3998688 | 264.3910528 | 264.385136 | 264.3775264 | 264.1134192 | 261.1308824 |
| 264.402232 | 264.4028688 | 264.3930528 | 264.386136 | 264.3815264 | 264.1184192 | 261.1328824 |
| 264.403232 | 264.4048688 | 264.3920528 | 264.390136 | 264.3815264 | 264.1144192 | 261.1298824 |
| 264.405232 | 264.4048688 | 264.3920528 | 264.391136 | 264.3855264 | 264.1174192 | 261.1318824 |
| 264.404232 | 264.4028688 | 264.3910528 | 264.389136 | 264.3825264 | 264.1184192 | 261.1288824 |
| 264.408232 | 264.4048688 | 264.3910528 | 264.392136 | 264.3855264 | 264.1204192 | 261.1288824 |
| 264.410232 | 264.4098688 | 264.3910528 | 264.396136 | 264.3885264 | 264.1214192 | 261.1288824 |
| 264.411232 | 264.4098688 | 264.3920528 | 264.397136 | 264.3905264 | 264.1254192 | 261.1278824 |

|            |             |             |            |             |             |             |
|------------|-------------|-------------|------------|-------------|-------------|-------------|
| 264.411232 | 264.4098688 | 264.3910528 | 264.398136 | 264.3895264 | 264.1224192 | 261.1268824 |
| 264.414232 | 264.4118688 | 264.3930528 | 264.400136 | 264.3925264 | 264.1284192 | 261.1268824 |
| 264.416232 | 264.4138688 | 264.3930528 | 264.402136 | 264.3935264 | 264.1304192 | 261.1288824 |
| 264.418232 | 264.4168688 | 264.3930528 | 264.405136 | 264.3965264 | 264.1344192 | 261.1288824 |
| 264.419232 | 264.4188688 | 264.3940528 | 264.405136 | 264.3975264 | 264.1334192 | 261.1278824 |
| 264.421232 | 264.4178688 | 264.3930528 | 264.404136 | 264.3995264 | 264.1314192 | 261.1278824 |
| 264.422232 | 264.4208688 | 264.3980528 | 264.409136 | 264.4005264 | 264.1384192 | 261.1288824 |
| 264.421232 | 264.4208688 | 264.3960528 | 264.409136 | 264.4005264 | 264.1394192 | 261.1278824 |
| 264.424232 | 264.4208688 | 264.3980528 | 264.409136 | 264.4025264 | 264.1424192 | 261.1298824 |
| 264.424232 | 264.4218688 | 264.3980528 | 264.409136 | 264.4045264 | 264.1404192 | 261.1308824 |
| 264.423232 | 264.4208688 | 264.3950528 | 264.408136 | 264.4015264 | 264.1374192 | 261.1278824 |
| 264.423232 | 264.4208688 | 264.3970528 | 264.409136 | 264.4035264 | 264.1354192 | 261.1278824 |
| 264.426232 | 264.4238688 | 264.3960528 | 264.410136 | 264.4045264 | 264.1384192 | 261.1278824 |
| 264.429232 | 264.4268688 | 264.3970528 | 264.415136 | 264.4075264 | 264.1384192 | 261.1328824 |
| 264.429232 | 264.4278688 | 264.3990528 | 264.415136 | 264.4085264 | 264.1414192 | 261.1308824 |
| 264.431232 | 264.4298688 | 264.3990528 | 264.417136 | 264.4085264 | 264.1414192 | 261.1338824 |
| 264.428232 | 264.4268688 | 264.3980528 | 264.413136 | 264.4075264 | 264.1394192 | 261.1308824 |
| 264.431232 | 264.4278688 | 264.4010528 | 264.416136 | 264.4085264 | 264.1414192 | 261.1358824 |
| 264.432232 | 264.4328688 | 264.4040528 | 264.418136 | 264.4115264 | 264.1414192 | 261.1378824 |
| 264.430232 | 264.4298688 | 264.4020528 | 264.416136 | 264.4115264 | 264.1414192 | 261.1378824 |
| 264.432232 | 264.4298688 | 264.4020528 | 264.416136 | 264.4095264 | 264.1424192 | 261.1378824 |
| 264.430232 | 264.4308688 | 264.4020528 | 264.416136 | 264.4095264 | 264.1414192 | 261.1398824 |
| 264.430232 | 264.4298688 | 264.4020528 | 264.414136 | 264.4085264 | 264.1394192 | 261.1398824 |
| 264.430232 | 264.4298688 | 264.4010528 | 264.414136 | 264.4095264 | 264.1404192 | 261.1418824 |
| 264.429232 | 264.4308688 | 264.4010528 | 264.414136 | 264.4095264 | 264.1384192 | 261.1428824 |
| 264.429232 | 264.4308688 | 264.4040528 | 264.415136 | 264.4105264 | 264.1394192 | 261.1458824 |
| 264.428232 | 264.4278688 | 264.4010528 | 264.414136 | 264.4065264 | 264.1374192 | 261.1428824 |
| 264.427232 | 264.4288688 | 264.4010528 | 264.415136 | 264.4075264 | 264.1364192 | 261.1478824 |
| 264.429232 | 264.4308688 | 264.4010528 | 264.415136 | 264.4075264 | 264.1364192 | 261.1478824 |
| 264.426232 | 264.4278688 | 264.4010528 | 264.414136 | 264.4085264 | 264.1374192 | 261.1458824 |
| 264.426232 | 264.4278688 | 264.4030528 | 264.414136 | 264.4085264 | 264.1354192 | 261.1508824 |
| 264.426232 | 264.4278688 | 264.4070528 | 264.414136 | 264.4085264 | 264.1354192 | 261.1508824 |
| 264.425232 | 264.4278688 | 264.4040528 | 264.412136 | 264.4045264 | 264.1334192 | 261.1508824 |
| 264.425232 | 264.4258688 | 264.4000528 | 264.411136 | 264.4045264 | 264.1304192 | 261.1508824 |
| 264.428232 | 264.4278688 | 264.4030528 | 264.412136 | 264.4065264 | 264.1354192 | 261.1508824 |
| 264.426232 | 264.4278688 | 264.4030528 | 264.411136 | 264.4065264 | 264.1334192 | 261.1528824 |
| 264.426232 | 264.4258688 | 264.4030528 | 264.410136 | 264.4035264 | 264.1314192 | 261.1528824 |
| 264.426232 | 264.4258688 | 264.4030528 | 264.412136 | 264.4045264 | 264.1314192 | 261.1538824 |
| 264.427232 | 264.4288688 | 264.4050528 | 264.412136 | 264.4055264 | 264.1334192 | 261.1558824 |
| 264.425232 | 264.4258688 | 264.4040528 | 264.411136 | 264.4045264 | 264.1304192 | 261.1528824 |
| 264.423232 | 264.4258688 | 264.4040528 | 264.411136 | 264.4065264 | 264.1304192 | 261.1528824 |
| 264.423232 | 264.4248688 | 264.4040528 | 264.410136 | 264.4035264 | 264.1314192 | 261.1538824 |
| 264.423232 | 264.4268688 | 264.4020528 | 264.411136 | 264.4035264 | 264.1294192 | 261.1538824 |
| 264.423232 | 264.4268688 | 264.4020528 | 264.408136 | 264.4015264 | 264.1294192 | 261.1518824 |
| 264.424232 | 264.4258688 | 264.4030528 | 264.408136 | 264.4025264 | 264.1274192 | 261.1508824 |
| 264.424232 | 264.4258688 | 264.4050528 | 264.410136 | 264.4035264 | 264.1294192 | 261.1538824 |
| 264.424232 | 264.4238688 | 264.4030528 | 264.410136 | 264.4035264 | 264.1274192 | 261.1538824 |

|            |             |             |            |             |             |             |
|------------|-------------|-------------|------------|-------------|-------------|-------------|
| 264.424232 | 264.4238688 | 264.4030528 | 264.410136 | 264.4035264 | 264.1274192 | 261.1538824 |
| 264.424232 | 264.4268688 | 264.4050528 | 264.412136 | 264.4035264 | 264.1314192 | 261.1538824 |
| 264.424232 | 264.4288688 | 264.4050528 | 264.410136 | 264.4035264 | 264.1294192 | 261.1538824 |
| 264.422232 | 264.4258688 | 264.4050528 | 264.410136 | 264.4045264 | 264.1294192 | 261.1518824 |
| 264.424232 | 264.4268688 | 264.4050528 | 264.410136 | 264.4025264 | 264.1314192 | 261.1548824 |
| 264.420232 | 264.4238688 | 264.4050528 | 264.408136 | 264.4005264 | 264.1294192 | 261.1518824 |
| 264.421232 | 264.4238688 | 264.4040528 | 264.406136 | 264.4025264 | 264.1284192 | 261.1528824 |
| 264.424232 | 264.4258688 | 264.4050528 | 264.408136 | 264.4005264 | 264.1284192 | 261.1538824 |
| 264.421232 | 264.4228688 | 264.4050528 | 264.407136 | 264.4005264 | 264.1304192 | 261.1538824 |
| 264.423232 | 264.4238688 | 264.4050528 | 264.407136 | 264.4005264 | 264.1304192 | 261.1538824 |
| 264.421232 | 264.4238688 | 264.4040528 | 264.407136 | 264.4025264 | 264.1284192 | 261.1528824 |
| 264.422232 | 264.4238688 | 264.4050528 | 264.408136 | 264.4025264 | 264.1314192 | 261.1568824 |
| 264.424232 | 264.4268688 | 264.4080528 | 264.408136 | 264.4035264 | 264.1334192 | 261.1548824 |
| 264.420232 | 264.4258688 | 264.4070528 | 264.408136 | 264.4025264 | 264.1314192 | 261.1538824 |
| 264.421232 | 264.4228688 | 264.4050528 | 264.406136 | 264.4005264 | 264.1304192 | 261.1528824 |
| 264.421232 | 264.4238688 | 264.4070528 | 264.409136 | 264.4025264 | 264.1304192 | 261.1538824 |
| 264.421232 | 264.4238688 | 264.4070528 | 264.407136 | 264.3995264 | 264.1304192 | 261.1538824 |
| 264.421232 | 264.4258688 | 264.4060528 | 264.407136 | 264.4015264 | 264.1284192 | 261.1538824 |
| 264.420232 | 264.4228688 | 264.4040528 | 264.406136 | 264.3985264 | 264.1294192 | 261.1548824 |
| 264.421232 | 264.4238688 | 264.4090528 | 264.407136 | 264.4005264 | 264.1304192 | 261.1558824 |
| 264.419232 | 264.4238688 | 264.4060528 | 264.407136 | 264.4015264 | 264.1304192 | 261.1538824 |
| 264.421232 | 264.4238688 | 264.4070528 | 264.407136 | 264.4025264 | 264.1284192 | 261.1558824 |
| 264.421232 | 264.4248688 | 264.4040528 | 264.406136 | 264.4015264 | 264.1274192 | 261.1528824 |
| 264.420232 | 264.4228688 | 264.4040528 | 264.406136 | 264.3995264 | 264.1274192 | 261.1548824 |
| 264.421232 | 264.4228688 | 264.4070528 | 264.406136 | 264.4015264 | 264.1304192 | 261.1538824 |
| 264.421232 | 264.4238688 | 264.4070528 | 264.406136 | 264.4005264 | 264.1284192 | 261.1538824 |
| 264.419232 | 264.4238688 | 264.4070528 | 264.406136 | 264.4015264 | 264.1274192 | 261.1538824 |
| 264.421232 | 264.4238688 | 264.4070528 | 264.406136 | 264.3995264 | 264.1274192 | 261.1528824 |
| 264.419232 | 264.4208688 | 264.4060528 | 264.404136 | 264.3995264 | 264.1254192 | 261.1528824 |
| 264.418232 | 264.4208688 | 264.4060528 | 264.406136 | 264.3975264 | 264.1274192 | 261.1538824 |
| 264.419232 | 264.4208688 | 264.4070528 | 264.404136 | 264.3995264 | 264.1264192 | 261.1538824 |
| 264.420232 | 264.4228688 | 264.4080528 | 264.405136 | 264.3985264 | 264.1274192 | 261.1538824 |
| 264.418232 | 264.4218688 | 264.4090528 | 264.403136 | 264.3965264 | 264.1254192 | 261.1538824 |
| 264.417232 | 264.4218688 | 264.4070528 | 264.403136 | 264.3975264 | 264.1264192 | 261.1548824 |
| 264.418232 | 264.4218688 | 264.4080528 | 264.402136 | 264.3955264 | 264.1234192 | 261.1538824 |
| 264.417232 | 264.4198688 | 264.4090528 | 264.402136 | 264.3945264 | 264.1254192 | 261.1538824 |
| 264.414232 | 264.4168688 | 264.4060528 | 264.399136 | 264.3925264 | 264.1204192 | 261.1528824 |
| 264.410232 | 264.4178688 | 264.4060528 | 264.399136 | 264.3915264 | 264.1214192 | 261.1538824 |
| 264.414232 | 264.4178688 | 264.4060528 | 264.399136 | 264.3935264 | 264.1214192 | 261.1538824 |
| 264.413232 | 264.4158688 | 264.4070528 | 264.397136 | 264.3915264 | 264.1214192 | 261.1538824 |
| 264.411232 | 264.4148688 | 264.4070528 | 264.397136 | 264.3905264 | 264.1204192 | 261.1538824 |
| 264.413232 | 264.4158688 | 264.4080528 | 264.397136 | 264.3925264 | 264.1224192 | 261.1528824 |
| 264.411232 | 264.4158688 | 264.4070528 | 264.397136 | 264.3895264 | 264.1184192 | 261.1538824 |
| 264.410232 | 264.4128688 | 264.4050528 | 264.395136 | 264.3895264 | 264.1154192 | 261.1518824 |
| 264.409232 | 264.4128688 | 264.4060528 | 264.395136 | 264.3855264 | 264.1164192 | 261.1548824 |
| 264.408232 | 264.4128688 | 264.4040528 | 264.395136 | 264.3865264 | 264.1184192 | 261.1508824 |
| 264.406232 | 264.4108688 | 264.4040528 | 264.391136 | 264.3835264 | 264.1154192 | 261.1528824 |

|            |             |             |            |             |             |             |
|------------|-------------|-------------|------------|-------------|-------------|-------------|
| 264.407232 | 264.4088688 | 264.4020528 | 264.391136 | 264.3855264 | 264.1124192 | 261.1508824 |
| 264.407232 | 264.4108688 | 264.4050528 | 264.391136 | 264.3845264 | 264.1154192 | 261.1558824 |
| 264.403232 | 264.4078688 | 264.4040528 | 264.386136 | 264.3795264 | 264.1104192 | 261.1498824 |
| 264.404232 | 264.4068688 | 264.4050528 | 264.389136 | 264.3825264 | 264.1114192 | 261.1538824 |
| 264.403232 | 264.4088688 | 264.4020528 | 264.389136 | 264.3805264 | 264.1084192 | 261.1538824 |
| 264.401232 | 264.4038688 | 264.4020528 | 264.384136 | 264.3785264 | 264.1054192 | 261.1498824 |
| 264.399232 | 264.4048688 | 264.4010528 | 264.386136 | 264.3785264 | 264.1054192 | 261.1498824 |
| 264.400232 | 264.4038688 | 264.4010528 | 264.383136 | 264.3775264 | 264.1054192 | 261.1508824 |
| 264.398232 | 264.4018688 | 264.4010528 | 264.384136 | 264.3775264 | 264.1054192 | 261.1488824 |
| 264.397232 | 264.4018688 | 264.4000528 | 264.382136 | 264.3745264 | 264.1044192 | 261.1478824 |
| 264.395232 | 264.4038688 | 264.4000528 | 264.382136 | 264.3745264 | 264.1034192 | 261.1478824 |
| 264.397232 | 264.4028688 | 264.4000528 | 264.382136 | 264.3745264 | 264.1044192 | 261.1498824 |
| 264.396232 | 264.4018688 | 264.4010528 | 264.380136 | 264.3725264 | 264.1044192 | 261.1498824 |
| 264.393232 | 264.3988688 | 264.4010528 | 264.378136 | 264.3705264 | 264.1024192 | 261.1468824 |
| 264.394232 | 264.4008688 | 264.4030528 | 264.378136 | 264.3705264 | 264.1054192 | 261.1478824 |
| 264.395232 | 264.4008688 | 264.4020528 | 264.379136 | 264.3715264 | 264.1044192 | 261.1468824 |
| 264.392232 | 264.3998688 | 264.4010528 | 264.378136 | 264.3705264 | 264.1014192 | 261.1478824 |
| 264.392232 | 264.3978688 | 264.3990528 | 264.376136 | 264.3685264 | 264.0994192 | 261.1488824 |
| 264.392232 | 264.3978688 | 264.3970528 | 264.376136 | 264.3705264 | 264.0994192 | 261.1458824 |
| 264.390232 | 264.3968688 | 264.3970528 | 264.375136 | 264.3665264 | 264.1014192 | 261.1458824 |
| 264.391232 | 264.3958688 | 264.3970528 | 264.374136 | 264.3665264 | 264.0994192 | 261.1458824 |
| 264.390232 | 264.3948688 | 264.3990528 | 264.374136 | 264.3685264 | 264.0994192 | 261.1458824 |
| 264.388232 | 264.3938688 | 264.3950528 | 264.373136 | 264.3635264 | 264.0994192 | 261.1428824 |
| 264.388232 | 264.3948688 | 264.3970528 | 264.375136 | 264.3645264 | 264.0964192 | 261.1458824 |
| 264.387232 | 264.3918688 | 264.3960528 | 264.375136 | 264.3635264 | 264.0984192 | 261.1408824 |
| 264.387232 | 264.3918688 | 264.3940528 | 264.373136 | 264.3635264 | 264.0964192 | 261.1408824 |
| 264.386232 | 264.3918688 | 264.3920528 | 264.371136 | 264.3635264 | 264.0974192 | 261.1428824 |
| 264.388232 | 264.3948688 | 264.3950528 | 264.374136 | 264.3645264 | 264.0974192 | 261.1428824 |
| 264.388232 | 264.3928688 | 264.3950528 | 264.372136 | 264.3645264 | 264.0954192 | 261.1408824 |
| 264.386232 | 264.3918688 | 264.3920528 | 264.372136 | 264.3635264 | 264.0974192 | 261.1378824 |
| 264.388232 | 264.3928688 | 264.3930528 | 264.372136 | 264.3645264 | 264.0974192 | 261.1388824 |
| 264.386232 | 264.3918688 | 264.3930528 | 264.369136 | 264.3645264 | 264.0974192 | 261.1388824 |
| 264.386232 | 264.3898688 | 264.3910528 | 264.371136 | 264.3645264 | 264.0994192 | 261.1378824 |
| 264.388232 | 264.3918688 | 264.3930528 | 264.372136 | 264.3625264 | 264.0954192 | 261.1388824 |
| 264.386232 | 264.3898688 | 264.3900528 | 264.371136 | 264.3625264 | 264.0974192 | 261.1358824 |
| 264.388232 | 264.3898688 | 264.3880528 | 264.373136 | 264.3625264 | 264.0974192 | 261.1348824 |
| 264.388232 | 264.3918688 | 264.3930528 | 264.377136 | 264.3655264 | 264.1004192 | 261.1358824 |
| 264.388232 | 264.3898688 | 264.3900528 | 264.374136 | 264.3645264 | 264.1014192 | 261.1328824 |
| 264.388232 | 264.3918688 | 264.3900528 | 264.374136 | 264.3645264 | 264.1034192 | 261.1348824 |
| 264.393232 | 264.3978688 | 264.3910528 | 264.379136 | 264.3695264 | 264.1054192 | 261.1358824 |
| 264.394232 | 264.3978688 | 264.3910528 | 264.382136 | 264.3705264 | 264.1054192 | 261.1318824 |
| 264.390232 | 264.3958688 | 264.3890528 | 264.380136 | 264.3685264 | 264.1074192 | 261.1318824 |
| 264.395232 | 264.3968688 | 264.3900528 | 264.382136 | 264.3705264 | 264.1104192 | 261.1318824 |
| 264.398232 | 264.3978688 | 264.3890528 | 264.382136 | 264.3725264 | 264.1104192 | 261.1308824 |
| 264.400232 | 264.4018688 | 264.3930528 | 264.388136 | 264.3765264 | 264.1154192 | 261.1328824 |
| 264.402232 | 264.4018688 | 264.3910528 | 264.389136 | 264.3765264 | 264.1164192 | 261.1318824 |
| 264.403232 | 264.4058688 | 264.3940528 | 264.390136 | 264.3795264 | 264.1184192 | 261.1318824 |

|            |             |             |            |             |             |             |
|------------|-------------|-------------|------------|-------------|-------------|-------------|
| 264.406232 | 264.4078688 | 264.3920528 | 264.392136 | 264.3825264 | 264.1214192 | 261.1328824 |
| 264.405232 | 264.4078688 | 264.3920528 | 264.394136 | 264.3845264 | 264.1214192 | 261.1278824 |
| 264.408232 | 264.4088688 | 264.3940528 | 264.395136 | 264.3855264 | 264.1224192 | 261.1278824 |
| 264.410232 | 264.4108688 | 264.3920528 | 264.397136 | 264.3875264 | 264.1244192 | 261.1288824 |
| 264.409232 | 264.4108688 | 264.3930528 | 264.398136 | 264.3885264 | 264.1264192 | 261.1288824 |
| 264.414232 | 264.4138688 | 264.3930528 | 264.401136 | 264.3915264 | 264.1294192 | 261.1268824 |
| 264.417232 | 264.4168688 | 264.3940528 | 264.404136 | 264.3935264 | 264.1324192 | 261.1268824 |
| 264.418232 | 264.4168688 | 264.3930528 | 264.404136 | 264.3955264 | 264.1324192 | 261.1258824 |
| 264.422232 | 264.4208688 | 264.3970528 | 264.408136 | 264.3975264 | 264.1354192 | 261.1278824 |
| 264.422232 | 264.4188688 | 264.3950528 | 264.407136 | 264.3975264 | 264.1334192 | 261.1268824 |
| 264.422232 | 264.4218688 | 264.3950528 | 264.410136 | 264.4005264 | 264.1364192 | 261.1268824 |
| 264.425232 | 264.4238688 | 264.3980528 | 264.411136 | 264.4025264 | 264.1384192 | 261.1258824 |
| 264.428232 | 264.4248688 | 264.3990528 | 264.412136 | 264.4035264 | 264.1394192 | 261.1268824 |
| 264.430232 | 264.4278688 | 264.3980528 | 264.415136 | 264.4025264 | 264.1404192 | 261.1268824 |
| 264.428232 | 264.4258688 | 264.3980528 | 264.413136 | 264.4055264 | 264.1394192 | 261.1268824 |
| 264.427232 | 264.4268688 | 264.3990528 | 264.414136 | 264.4055264 | 264.1424192 | 261.1258824 |
| 264.428232 | 264.4278688 | 264.4000528 | 264.416136 | 264.4075264 | 264.1414192 | 261.1288824 |
| 264.429232 | 264.4298688 | 264.4010528 | 264.418136 | 264.4095264 | 264.1424192 | 261.1288824 |
| 264.431232 | 264.4288688 | 264.4010528 | 264.418136 | 264.4085264 | 264.1424192 | 261.1278824 |
| 264.432232 | 264.4308688 | 264.4020528 | 264.418136 | 264.4095264 | 264.1414192 | 261.1288824 |
| 264.433232 | 264.4298688 | 264.4030528 | 264.416136 | 264.4075264 | 264.1424192 | 261.1318824 |
| 264.430232 | 264.4268688 | 264.4010528 | 264.414136 | 264.4065264 | 264.1424192 | 261.1298824 |
| 264.434232 | 264.4328688 | 264.4040528 | 264.420136 | 264.4135264 | 264.1434192 | 261.1338824 |
| 264.435232 | 264.4348688 | 264.4030528 | 264.422136 | 264.4115264 | 264.1444192 | 261.1348824 |
| 264.433232 | 264.4328688 | 264.4010528 | 264.418136 | 264.4115264 | 264.1424192 | 261.1348824 |
| 264.433232 | 264.4328688 | 264.4030528 | 264.420136 | 264.4115264 | 264.1444192 | 261.1378824 |
| 264.432232 | 264.4328688 | 264.4040528 | 264.418136 | 264.4105264 | 264.1384192 | 261.1378824 |
| 264.434232 | 264.4338688 | 264.4060528 | 264.419136 | 264.4105264 | 264.1414192 | 261.1408824 |
| 264.432232 | 264.4318688 | 264.4060528 | 264.419136 | 264.4105264 | 264.1414192 | 261.1418824 |
| 264.432232 | 264.4308688 | 264.4050528 | 264.416136 | 264.4125264 | 264.1394192 | 261.1438824 |
| 264.431232 | 264.4318688 | 264.4060528 | 264.418136 | 264.4115264 | 264.1404192 | 261.1428824 |
| 264.432232 | 264.4318688 | 264.4080528 | 264.418136 | 264.4115264 | 264.1384192 | 261.1448824 |
| 264.431232 | 264.4328688 | 264.4040528 | 264.418136 | 264.4115264 | 264.1384192 | 261.1448824 |
| 264.433232 | 264.4328688 | 264.4070528 | 264.418136 | 264.4125264 | 264.1414192 | 261.1478824 |
| 264.433232 | 264.4338688 | 264.4090528 | 264.421136 | 264.4125264 | 264.1404192 | 261.1468824 |
| 264.432232 | 264.4328688 | 264.4070528 | 264.418136 | 264.4125264 | 264.1374192 | 261.1478824 |
| 264.431232 | 264.4328688 | 264.4070528 | 264.418136 | 264.4125264 | 264.1394192 | 261.1508824 |
| 264.431232 | 264.4328688 | 264.4070528 | 264.418136 | 264.4115264 | 264.1364192 | 261.1518824 |
| 264.434232 | 264.4338688 | 264.4080528 | 264.419136 | 264.4115264 | 264.1384192 | 261.1518824 |
| 264.432232 | 264.4308688 | 264.4080528 | 264.417136 | 264.4095264 | 264.1344192 | 261.1518824 |
| 264.430232 | 264.4308688 | 264.4090528 | 264.417136 | 264.4095264 | 264.1344192 | 261.1548824 |
| 264.430232 | 264.4308688 | 264.4080528 | 264.416136 | 264.4095264 | 264.1324192 | 261.1528824 |
| 264.429232 | 264.4308688 | 264.4100528 | 264.417136 | 264.4095264 | 264.1364192 | 261.1548824 |
| 264.430232 | 264.4308688 | 264.4080528 | 264.416136 | 264.4085264 | 264.1364192 | 261.1548824 |
| 264.427232 | 264.4298688 | 264.4070528 | 264.415136 | 264.4085264 | 264.1334192 | 261.1538824 |
| 264.429232 | 264.4308688 | 264.4100528 | 264.416136 | 264.4085264 | 264.1334192 | 261.1568824 |
| 264.429232 | 264.4328688 | 264.4100528 | 264.418136 | 264.4085264 | 264.1354192 | 261.1568824 |

|            |             |             |            |             |             |             |
|------------|-------------|-------------|------------|-------------|-------------|-------------|
| 264.429232 | 264.4328688 | 264.4120528 | 264.419136 | 264.4105264 | 264.1354192 | 261.1548824 |
| 264.428232 | 264.4298688 | 264.4110528 | 264.417136 | 264.4075264 | 264.1344192 | 261.1578824 |
| 264.429232 | 264.4318688 | 264.4100528 | 264.414136 | 264.4095264 | 264.1334192 | 261.1558824 |
| 264.429232 | 264.4298688 | 264.4100528 | 264.417136 | 264.4105264 | 264.1334192 | 261.1578824 |
| 264.428232 | 264.4288688 | 264.4100528 | 264.416136 | 264.4065264 | 264.1354192 | 261.1578824 |
| 264.429232 | 264.4308688 | 264.4100528 | 264.417136 | 264.4085264 | 264.1354192 | 261.1578824 |
| 264.428232 | 264.4288688 | 264.4090528 | 264.418136 | 264.4075264 | 264.1344192 | 261.1568824 |
| 264.429232 | 264.4308688 | 264.4100528 | 264.416136 | 264.4095264 | 264.1334192 | 261.1568824 |
| 264.429232 | 264.4328688 | 264.4100528 | 264.416136 | 264.4095264 | 264.1354192 | 261.1568824 |
| 264.429232 | 264.4328688 | 264.4100528 | 264.415136 | 264.4095264 | 264.1354192 | 261.1578824 |
| 264.430232 | 264.4328688 | 264.4090528 | 264.415136 | 264.4115264 | 264.1324192 | 261.1578824 |
| 264.430232 | 264.4318688 | 264.4090528 | 264.417136 | 264.4105264 | 264.1364192 | 261.1558824 |
| 264.429232 | 264.4318688 | 264.4080528 | 264.416136 | 264.4115264 | 264.1354192 | 261.1568824 |
| 264.429232 | 264.4308688 | 264.4080528 | 264.416136 | 264.4095264 | 264.1354192 | 261.1548824 |
| 264.431232 | 264.4318688 | 264.4100528 | 264.418136 | 264.4115264 | 264.1354192 | 261.1568824 |
| 264.432232 | 264.4318688 | 264.4090528 | 264.418136 | 264.4115264 | 264.1364192 | 261.1558824 |
| 264.433232 | 264.4338688 | 264.4110528 | 264.421136 | 264.4135264 | 264.1394192 | 261.1568824 |
| 264.433232 | 264.4358688 | 264.4120528 | 264.421136 | 264.4155264 | 264.1394192 | 261.1568824 |
| 264.436232 | 264.4358688 | 264.4130528 | 264.421136 | 264.4155264 | 264.1414192 | 261.1568824 |
| 264.436232 | 264.4358688 | 264.4110528 | 264.423136 | 264.4155264 | 264.1424192 | 261.1578824 |
| 264.435232 | 264.4358688 | 264.4100528 | 264.422136 | 264.4165264 | 264.1414192 | 261.1568824 |
| 264.434232 | 264.4378688 | 264.4120528 | 264.422136 | 264.4145264 | 264.1414192 | 261.1568824 |
| 264.437232 | 264.4378688 | 264.4140528 | 264.424136 | 264.4185264 | 264.1434192 | 261.1568824 |
| 264.436232 | 264.4368688 | 264.4150528 | 264.422136 | 264.4175264 | 264.1424192 | 261.1588824 |
| 264.435232 | 264.4388688 | 264.4150528 | 264.423136 | 264.4175264 | 264.1444192 | 261.1568824 |
| 264.437232 | 264.4368688 | 264.4120528 | 264.423136 | 264.4155264 | 264.1434192 | 261.1578824 |
| 264.435232 | 264.4368688 | 264.4140528 | 264.421136 | 264.4145264 | 264.1414192 | 261.1578824 |
| 264.435232 | 264.4358688 | 264.4130528 | 264.421136 | 264.4135264 | 264.1394192 | 261.1578824 |
| 264.436232 | 264.4388688 | 264.4160528 | 264.423136 | 264.4165264 | 264.1434192 | 261.1598824 |
| 264.435232 | 264.4378688 | 264.4150528 | 264.422136 | 264.4155264 | 264.1424192 | 261.1578824 |
| 264.436232 | 264.4378688 | 264.4160528 | 264.423136 | 264.4145264 | 264.1424192 | 261.1568824 |
| 264.436232 | 264.4368688 | 264.4160528 | 264.421136 | 264.4145264 | 264.1424192 | 261.1588824 |
| 264.433232 | 264.4358688 | 264.4150528 | 264.420136 | 264.4115264 | 264.1394192 | 261.1548824 |
| 264.433232 | 264.4368688 | 264.4150528 | 264.420136 | 264.4115264 | 264.1394192 | 261.1578824 |
| 264.430232 | 264.4338688 | 264.4140528 | 264.417136 | 264.4105264 | 264.1364192 | 261.1578824 |
| 264.430232 | 264.4328688 | 264.4140528 | 264.417136 | 264.4085264 | 264.1384192 | 261.1578824 |
| 264.430232 | 264.4338688 | 264.4130528 | 264.415136 | 264.4085264 | 264.1344192 | 261.1608824 |
| 264.431232 | 264.4318688 | 264.4150528 | 264.415136 | 264.4065264 | 264.1354192 | 261.1608824 |
| 264.426232 | 264.4328688 | 264.4130528 | 264.414136 | 264.4065264 | 264.1324192 | 261.1598824 |
| 264.428232 | 264.4318688 | 264.4150528 | 264.412136 | 264.4065264 | 264.1334192 | 261.1608824 |
| 264.423232 | 264.4288688 | 264.4130528 | 264.410136 | 264.4035264 | 264.1304192 | 261.1598824 |
| 264.424232 | 264.4288688 | 264.4150528 | 264.410136 | 264.4045264 | 264.1334192 | 261.1608824 |
| 264.419232 | 264.4258688 | 264.4120528 | 264.407136 | 264.4005264 | 264.1274192 | 261.1598824 |
| 264.418232 | 264.4258688 | 264.4140528 | 264.406136 | 264.3985264 | 264.1254192 | 261.1578824 |
| 264.418232 | 264.4258688 | 264.4140528 | 264.406136 | 264.3985264 | 264.1254192 | 261.1598824 |
| 264.416232 | 264.4228688 | 264.4140528 | 264.404136 | 264.3965264 | 264.1254192 | 261.1618824 |
| 264.414232 | 264.4218688 | 264.4120528 | 264.403136 | 264.3955264 | 264.1204192 | 261.1598824 |

|            |             |             |            |             |             |             |
|------------|-------------|-------------|------------|-------------|-------------|-------------|
| 264.413232 | 264.4198688 | 264.4130528 | 264.400136 | 264.3925264 | 264.1214192 | 261.1598824 |
| 264.411232 | 264.4168688 | 264.4110528 | 264.398136 | 264.3895264 | 264.1174192 | 261.1588824 |
| 264.410232 | 264.4178688 | 264.4100528 | 264.398136 | 264.3915264 | 264.1164192 | 261.1568824 |
| 264.409232 | 264.4178688 | 264.4100528 | 264.397136 | 264.3895264 | 264.1154192 | 261.1588824 |
| 264.409232 | 264.4178688 | 264.4100528 | 264.397136 | 264.3895264 | 264.1134192 | 261.1608824 |
| 264.404232 | 264.4118688 | 264.4080528 | 264.393136 | 264.3855264 | 264.1144192 | 261.1598824 |
| 264.405232 | 264.4138688 | 264.4100528 | 264.393136 | 264.3875264 | 264.1104192 | 261.1598824 |
| 264.405232 | 264.4118688 | 264.4100528 | 264.391136 | 264.3845264 | 264.1124192 | 261.1598824 |
| 264.405232 | 264.4118688 | 264.4100528 | 264.391136 | 264.3845264 | 264.1094192 | 261.1598824 |
| 264.405232 | 264.4118688 | 264.4100528 | 264.390136 | 264.3825264 | 264.1094192 | 261.1598824 |
| 264.403232 | 264.4088688 | 264.4060528 | 264.387136 | 264.3805264 | 264.1094192 | 261.1568824 |
| 264.401232 | 264.4108688 | 264.4060528 | 264.390136 | 264.3805264 | 264.1094192 | 261.1578824 |
| 264.398232 | 264.4058688 | 264.4050528 | 264.385136 | 264.3775264 | 264.1064192 | 261.1558824 |
| 264.399232 | 264.4058688 | 264.4060528 | 264.384136 | 264.3785264 | 264.1064192 | 261.1558824 |
| 264.401232 | 264.4058688 | 264.4080528 | 264.384136 | 264.3765264 | 264.1074192 | 261.1558824 |
| 264.398232 | 264.4048688 | 264.4050528 | 264.382136 | 264.3745264 | 264.1044192 | 261.1548824 |
| 264.400232 | 264.4068688 | 264.4070528 | 264.383136 | 264.3775264 | 264.1064192 | 261.1548824 |
| 264.396232 | 264.4038688 | 264.4040528 | 264.382136 | 264.3745264 | 264.1014192 | 261.1538824 |
| 264.398232 | 264.4038688 | 264.4030528 | 264.382136 | 264.3755264 | 264.1044192 | 261.1528824 |
| 264.396232 | 264.4038688 | 264.4030528 | 264.382136 | 264.3735264 | 264.1054192 | 261.1528824 |
| 264.395232 | 264.4008688 | 264.4020528 | 264.379136 | 264.3725264 | 264.1034192 | 261.1498824 |
| 264.395232 | 264.4008688 | 264.4020528 | 264.381136 | 264.3725264 | 264.1034192 | 261.1478824 |
| 264.392232 | 264.3978688 | 264.4010528 | 264.378136 | 264.3715264 | 264.1034192 | 261.1498824 |
| 264.391232 | 264.3998688 | 264.4000528 | 264.377136 | 264.3705264 | 264.1044192 | 261.1508824 |
| 264.391232 | 264.3988688 | 264.4020528 | 264.377136 | 264.3685264 | 264.1014192 | 261.1478824 |
| 264.391232 | 264.3968688 | 264.4000528 | 264.377136 | 264.3685264 | 264.1034192 | 261.1478824 |
| 264.392232 | 264.3988688 | 264.4000528 | 264.379136 | 264.3705264 | 264.1014192 | 261.1478824 |
| 264.392232 | 264.3988688 | 264.3970528 | 264.379136 | 264.3675264 | 264.1024192 | 261.1448824 |
| 264.390232 | 264.3978688 | 264.3960528 | 264.375136 | 264.3665264 | 264.0994192 | 261.1418824 |
| 264.392232 | 264.3978688 | 264.3970528 | 264.377136 | 264.3685264 | 264.1004192 | 261.1438824 |
| 264.393232 | 264.3988688 | 264.3970528 | 264.379136 | 264.3675264 | 264.1004192 | 261.1428824 |
| 264.393232 | 264.3988688 | 264.3960528 | 264.379136 | 264.3695264 | 264.1014192 | 261.1418824 |
| 264.396232 | 264.3988688 | 264.3950528 | 264.381136 | 264.3735264 | 264.1034192 | 261.1428824 |
| 264.394232 | 264.3998688 | 264.3950528 | 264.380136 | 264.3725264 | 264.1044192 | 261.1408824 |
| 264.396232 | 264.3978688 | 264.3950528 | 264.382136 | 264.3735264 | 264.1074192 | 261.1378824 |
| 264.398232 | 264.4018688 | 264.3950528 | 264.386136 | 264.3785264 | 264.1114192 | 261.1378824 |
| 264.399232 | 264.4018688 | 264.3950528 | 264.385136 | 264.3765264 | 264.1104192 | 261.1368824 |
| 264.401232 | 264.4058688 | 264.3950528 | 264.390136 | 264.3815264 | 264.1124192 | 261.1378824 |
| 264.404232 | 264.4078688 | 264.3940528 | 264.392136 | 264.3825264 | 264.1154192 | 261.1358824 |
| 264.405232 | 264.4058688 | 264.3930528 | 264.393136 | 264.3835264 | 264.1184192 | 261.1348824 |
| 264.409232 | 264.4098688 | 264.3950528 | 264.396136 | 264.3875264 | 264.1204192 | 261.1368824 |
| 264.411232 | 264.4108688 | 264.3960528 | 264.399136 | 264.3905264 | 264.1264192 | 261.1368824 |
| 264.414232 | 264.4148688 | 264.3950528 | 264.402136 | 264.3935264 | 264.1274192 | 261.1348824 |
| 264.418232 | 264.4168688 | 264.3980528 | 264.403136 | 264.3945264 | 264.1304192 | 261.1348824 |
| 264.418232 | 264.4178688 | 264.3970528 | 264.405136 | 264.3965264 | 264.1314192 | 261.1348824 |
| 264.421232 | 264.4198688 | 264.3980528 | 264.408136 | 264.4005264 | 264.1364192 | 261.1348824 |
| 264.421232 | 264.4198688 | 264.3970528 | 264.409136 | 264.4005264 | 264.1374192 | 261.1338824 |

|            |             |             |            |             |             |             |
|------------|-------------|-------------|------------|-------------|-------------|-------------|
| 264.421232 | 264.4218688 | 264.3960528 | 264.409136 | 264.4015264 | 264.1374192 | 261.1318824 |
| 264.425232 | 264.4218688 | 264.3980528 | 264.411136 | 264.4015264 | 264.1404192 | 261.1328824 |
| 264.424232 | 264.4248688 | 264.4000528 | 264.411136 | 264.4025264 | 264.1414192 | 261.1318824 |
| 264.422232 | 264.4238688 | 264.3990528 | 264.408136 | 264.4015264 | 264.1384192 | 261.1308824 |
| 264.426232 | 264.4268688 | 264.4030528 | 264.411136 | 264.4065264 | 264.1434192 | 261.1348824 |
| 264.423232 | 264.4238688 | 264.3980528 | 264.411136 | 264.4035264 | 264.1384192 | 261.1328824 |
| 264.424232 | 264.4248688 | 264.4000528 | 264.409136 | 264.4005264 | 264.1344192 | 261.1308824 |
| 264.424232 | 264.4248688 | 264.4020528 | 264.411136 | 264.4035264 | 264.1364192 | 261.1328824 |
| 264.424232 | 264.4258688 | 264.4010528 | 264.411136 | 264.4025264 | 264.1374192 | 261.1308824 |
| 264.425232 | 264.4268688 | 264.4020528 | 264.413136 | 264.4055264 | 264.1364192 | 261.1338824 |
| 264.426232 | 264.4268688 | 264.4050528 | 264.415136 | 264.4065264 | 264.1394192 | 261.1368824 |
| 264.425232 | 264.4248688 | 264.4040528 | 264.411136 | 264.4065264 | 264.1384192 | 261.1358824 |
| 264.424232 | 264.4268688 | 264.4040528 | 264.413136 | 264.4035264 | 264.1364192 | 261.1378824 |
| 264.425232 | 264.4288688 | 264.4050528 | 264.412136 | 264.4065264 | 264.1404192 | 261.1388824 |
| 264.425232 | 264.4268688 | 264.4050528 | 264.412136 | 264.4025264 | 264.1364192 | 261.1408824 |
| 264.423232 | 264.4268688 | 264.4050528 | 264.409136 | 264.4045264 | 264.1324192 | 261.1408824 |
| 264.423232 | 264.4268688 | 264.4070528 | 264.411136 | 264.4045264 | 264.1344192 | 261.1418824 |
| 264.423232 | 264.4268688 | 264.4070528 | 264.411136 | 264.4045264 | 264.1344192 | 261.1408824 |
| 264.424232 | 264.4268688 | 264.4070528 | 264.411136 | 264.4045264 | 264.1344192 | 261.1438824 |
| 264.422232 | 264.4278688 | 264.4050528 | 264.410136 | 264.4035264 | 264.1334192 | 261.1428824 |
| 264.422232 | 264.4248688 | 264.4060528 | 264.410136 | 264.4025264 | 264.1334192 | 261.1448824 |
| 264.421232 | 264.4268688 | 264.4060528 | 264.409136 | 264.4005264 | 264.1324192 | 261.1428824 |
| 264.421232 | 264.4278688 | 264.4070528 | 264.410136 | 264.4015264 | 264.1314192 | 261.1458824 |
| 264.423232 | 264.4258688 | 264.4050528 | 264.410136 | 264.4015264 | 264.1324192 | 261.1458824 |
| 264.422232 | 264.4268688 | 264.4060528 | 264.411136 | 264.4045264 | 264.1334192 | 261.1488824 |
| 264.422232 | 264.4258688 | 264.4050528 | 264.409136 | 264.4025264 | 264.1324192 | 261.1458824 |
| 264.420232 | 264.4238688 | 264.4050528 | 264.411136 | 264.4005264 | 264.1324192 | 261.1458824 |
| 264.422232 | 264.4268688 | 264.4080528 | 264.411136 | 264.4025264 | 264.1334192 | 261.1488824 |
| 264.423232 | 264.4238688 | 264.4040528 | 264.409136 | 264.4005264 | 264.1314192 | 261.1488824 |
| 264.422232 | 264.4258688 | 264.4060528 | 264.409136 | 264.4005264 | 264.1294192 | 261.1488824 |
| 264.422232 | 264.4238688 | 264.4060528 | 264.411136 | 264.4005264 | 264.1294192 | 261.1498824 |
| 264.421232 | 264.4258688 | 264.4060528 | 264.411136 | 264.4025264 | 264.1314192 | 261.1498824 |
| 264.423232 | 264.4258688 | 264.4070528 | 264.411136 | 264.4025264 | 264.1314192 | 261.1478824 |
| 264.421232 | 264.4238688 | 264.4070528 | 264.410136 | 264.4025264 | 264.1294192 | 261.1518824 |
| 264.421232 | 264.4238688 | 264.4070528 | 264.409136 | 264.4025264 | 264.1314192 | 261.1518824 |
| 264.420232 | 264.4228688 | 264.4040528 | 264.407136 | 264.4005264 | 264.1284192 | 261.1488824 |
| 264.420232 | 264.4228688 | 264.4080528 | 264.408136 | 264.4005264 | 264.1294192 | 261.1518824 |
| 264.419232 | 264.4208688 | 264.4050528 | 264.406136 | 264.3995264 | 264.1284192 | 261.1488824 |
| 264.420232 | 264.4228688 | 264.4080528 | 264.409136 | 264.4005264 | 264.1304192 | 261.1518824 |
| 264.418232 | 264.4218688 | 264.4080528 | 264.405136 | 264.3965264 | 264.1274192 | 261.1478824 |
| 264.416232 | 264.4198688 | 264.4060528 | 264.407136 | 264.3975264 | 264.1264192 | 261.1498824 |
| 264.414232 | 264.4188688 | 264.4030528 | 264.402136 | 264.3945264 | 264.1254192 | 261.1498824 |
| 264.416232 | 264.4198688 | 264.4060528 | 264.403136 | 264.3955264 | 264.1264192 | 261.1508824 |
| 264.416232 | 264.4198688 | 264.4040528 | 264.403136 | 264.3955264 | 264.1264192 | 261.1498824 |
| 264.415232 | 264.4188688 | 264.4060528 | 264.403136 | 264.3935264 | 264.1264192 | 261.1498824 |
| 264.413232 | 264.4198688 | 264.4050528 | 264.402136 | 264.3935264 | 264.1254192 | 261.1498824 |
| 264.417232 | 264.4188688 | 264.4060528 | 264.404136 | 264.3955264 | 264.1234192 | 261.1518824 |



|            |             |             |            |             |             |             |
|------------|-------------|-------------|------------|-------------|-------------|-------------|
| 264.414232 | 264.4188688 | 264.4050528 | 264.402136 | 264.3945264 | 264.1214192 | 261.1488824 |
| 264.415232 | 264.4188688 | 264.4070528 | 264.401136 | 264.3945264 | 264.1214192 | 261.1498824 |
| 264.415232 | 264.4178688 | 264.4050528 | 264.401136 | 264.3945264 | 264.1214192 | 261.1498824 |
| 264.415232 | 264.4198688 | 264.4060528 | 264.402136 | 264.3955264 | 264.1234192 | 261.1518824 |
| 264.414232 | 264.4178688 | 264.4050528 | 264.399136 | 264.3925264 | 264.1214192 | 261.1498824 |
| 264.414232 | 264.4178688 | 264.4050528 | 264.399136 | 264.3945264 | 264.1214192 | 261.1498824 |
| 264.415232 | 264.4188688 | 264.4070528 | 264.404136 | 264.3975264 | 264.1234192 | 261.1518824 |
| 264.413232 | 264.4178688 | 264.4050528 | 264.401136 | 264.3955264 | 264.1234192 | 261.1488824 |
| 264.417232 | 264.4198688 | 264.4060528 | 264.403136 | 264.3965264 | 264.1244192 | 261.1508824 |
| 264.414232 | 264.4178688 | 264.4050528 | 264.402136 | 264.3955264 | 264.1254192 | 261.1498824 |
| 264.414232 | 264.4188688 | 264.4020528 | 264.402136 | 264.3945264 | 264.1244192 | 261.1468824 |
| 264.414232 | 264.4168688 | 264.4040528 | 264.402136 | 264.3945264 | 264.1264192 | 261.1498824 |
| 264.416232 | 264.4198688 | 264.4050528 | 264.403136 | 264.3955264 | 264.1274192 | 261.1498824 |
| 264.416232 | 264.4188688 | 264.4060528 | 264.404136 | 264.3965264 | 264.1244192 | 261.1488824 |
| 264.416232 | 264.4198688 | 264.4040528 | 264.404136 | 264.3965264 | 264.1244192 | 261.1498824 |
| 264.419232 | 264.4198688 | 264.4060528 | 264.406136 | 264.3985264 | 264.1264192 | 261.1498824 |
| 264.417232 | 264.4208688 | 264.4050528 | 264.406136 | 264.3975264 | 264.1254192 | 261.1468824 |
| 264.419232 | 264.4218688 | 264.4060528 | 264.407136 | 264.4005264 | 264.1284192 | 261.1468824 |
| 264.420232 | 264.4218688 | 264.4060528 | 264.409136 | 264.4015264 | 264.1314192 | 261.1488824 |
| 264.420232 | 264.4228688 | 264.4060528 | 264.409136 | 264.4015264 | 264.1334192 | 261.1488824 |
| 264.422232 | 264.4238688 | 264.4060528 | 264.410136 | 264.4015264 | 264.1324192 | 261.1488824 |
| 264.423232 | 264.4238688 | 264.4070528 | 264.412136 | 264.4025264 | 264.1324192 | 261.1488824 |
| 264.423232 | 264.4218688 | 264.4070528 | 264.408136 | 264.4025264 | 264.1344192 | 261.1478824 |
| 264.425232 | 264.4258688 | 264.4070528 | 264.411136 | 264.4045264 | 264.1364192 | 261.1508824 |
| 264.422232 | 264.4238688 | 264.4070528 | 264.411136 | 264.4045264 | 264.1384192 | 261.1478824 |
| 264.425232 | 264.4258688 | 264.4070528 | 264.413136 | 264.4045264 | 264.1364192 | 261.1488824 |
| 264.426232 | 264.4258688 | 264.4080528 | 264.410136 | 264.4035264 | 264.1374192 | 261.1458824 |
| 264.424232 | 264.4258688 | 264.4060528 | 264.410136 | 264.4035264 | 264.1374192 | 261.1468824 |
| 264.427232 | 264.4288688 | 264.4110528 | 264.415136 | 264.4065264 | 264.1374192 | 261.1478824 |
| 264.426232 | 264.4278688 | 264.4060528 | 264.413136 | 264.4055264 | 264.1354192 | 261.1468824 |
| 264.426232 | 264.4278688 | 264.4080528 | 264.412136 | 264.4065264 | 264.1374192 | 261.1478824 |
| 264.429232 | 264.4288688 | 264.4110528 | 264.416136 | 264.4075264 | 264.1384192 | 261.1528824 |
| 264.426232 | 264.4278688 | 264.4080528 | 264.413136 | 264.4085264 | 264.1374192 | 261.1498824 |
| 264.426232 | 264.4278688 | 264.4080528 | 264.412136 | 264.4055264 | 264.1364192 | 261.1498824 |
| 264.426232 | 264.4278688 | 264.4100528 | 264.412136 | 264.4075264 | 264.1364192 | 261.1498824 |
| 264.427232 | 264.4278688 | 264.4070528 | 264.412136 | 264.4055264 | 264.1344192 | 261.1518824 |
| 264.425232 | 264.4278688 | 264.4090528 | 264.411136 | 264.4045264 | 264.1354192 | 261.1518824 |
| 264.426232 | 264.4278688 | 264.4100528 | 264.412136 | 264.4055264 | 264.1324192 | 261.1528824 |
| 264.426232 | 264.4278688 | 264.4080528 | 264.410136 | 264.4035264 | 264.1324192 | 261.1518824 |
| 264.423232 | 264.4258688 | 264.4080528 | 264.409136 | 264.4015264 | 264.1304192 | 261.1518824 |
| 264.422232 | 264.4238688 | 264.4080528 | 264.408136 | 264.3995264 | 264.1294192 | 261.1528824 |
| 264.424232 | 264.4248688 | 264.4100528 | 264.407136 | 264.4025264 | 264.1324192 | 261.1548824 |
| 264.426232 | 264.4248688 | 264.4130528 | 264.407136 | 264.4015264 | 264.1304192 | 261.1568824 |
| 264.420232 | 264.4218688 | 264.4100528 | 264.407136 | 264.3965264 | 264.1284192 | 261.1548824 |
| 264.420232 | 264.4218688 | 264.4110528 | 264.404136 | 264.3965264 | 264.1284192 | 261.1548824 |
| 264.419232 | 264.4218688 | 264.4090528 | 264.404136 | 264.3955264 | 264.1234192 | 261.1548824 |
| 264.416232 | 264.4198688 | 264.4090528 | 264.400136 | 264.3945264 | 264.1224192 | 261.1558824 |

|            |             |             |            |             |             |             |
|------------|-------------|-------------|------------|-------------|-------------|-------------|
| 264.416232 | 264.4198688 | 264.4090528 | 264.402136 | 264.3955264 | 264.1234192 | 261.1558824 |
| 264.411232 | 264.4158688 | 264.4080528 | 264.398136 | 264.3895264 | 264.1214192 | 261.1578824 |
| 264.413232 | 264.4158688 | 264.4090528 | 264.399136 | 264.3905264 | 264.1194192 | 261.1578824 |
| 264.408232 | 264.4128688 | 264.4080528 | 264.395136 | 264.3885264 | 264.1144192 | 261.1548824 |
| 264.408232 | 264.4128688 | 264.4060528 | 264.395136 | 264.3865264 | 264.1144192 | 261.1538824 |
| 264.407232 | 264.4118688 | 264.4080528 | 264.393136 | 264.3855264 | 264.1154192 | 261.1568824 |
| 264.407232 | 264.4118688 | 264.4080528 | 264.393136 | 264.3855264 | 264.1154192 | 261.1568824 |
| 264.406232 | 264.4108688 | 264.4080528 | 264.391136 | 264.3825264 | 264.1154192 | 261.1578824 |
| 264.404232 | 264.4098688 | 264.4040528 | 264.389136 | 264.3845264 | 264.1124192 | 261.1568824 |
| 264.404232 | 264.4078688 | 264.4040528 | 264.389136 | 264.3805264 | 264.1104192 | 261.1568824 |
| 264.401232 | 264.4058688 | 264.4050528 | 264.387136 | 264.3785264 | 264.1094192 | 261.1548824 |
| 264.401232 | 264.4068688 | 264.4030528 | 264.387136 | 264.3795264 | 264.1054192 | 261.1538824 |
| 264.400232 | 264.4048688 | 264.4020528 | 264.387136 | 264.3775264 | 264.1044192 | 261.1538824 |
| 264.397232 | 264.4048688 | 264.4030528 | 264.386136 | 264.3755264 | 264.1074192 | 261.1528824 |
| 264.398232 | 264.4028688 | 264.4020528 | 264.386136 | 264.3745264 | 264.1024192 | 261.1528824 |
| 264.398232 | 264.4038688 | 264.4020528 | 264.384136 | 264.3755264 | 264.1034192 | 261.1538824 |
| 264.397232 | 264.4038688 | 264.4010528 | 264.383136 | 264.3755264 | 264.1034192 | 261.1518824 |
| 264.397232 | 264.4018688 | 264.4030528 | 264.380136 | 264.3745264 | 264.1034192 | 261.1498824 |
| 264.396232 | 264.4018688 | 264.4020528 | 264.381136 | 264.3725264 | 264.1024192 | 261.1528824 |
| 264.398232 | 264.4018688 | 264.4020528 | 264.383136 | 264.3765264 | 264.1054192 | 261.1518824 |
| 264.395232 | 264.3988688 | 264.4010528 | 264.380136 | 264.3715264 | 264.1014192 | 261.1488824 |
| 264.394232 | 264.4008688 | 264.4040528 | 264.381136 | 264.3705264 | 264.1054192 | 261.1498824 |
| 264.392232 | 264.3978688 | 264.4000528 | 264.377136 | 264.3685264 | 264.1014192 | 261.1478824 |
| 264.390232 | 264.3958688 | 264.3980528 | 264.375136 | 264.3665264 | 264.0994192 | 261.1458824 |
| 264.389232 | 264.3958688 | 264.3970528 | 264.375136 | 264.3685264 | 264.0994192 | 261.1468824 |
| 264.391232 | 264.3968688 | 264.3990528 | 264.376136 | 264.3695264 | 264.1024192 | 261.1468824 |
| 264.386232 | 264.3918688 | 264.3980528 | 264.374136 | 264.3635264 | 264.0984192 | 261.1438824 |
| 264.388232 | 264.3958688 | 264.3980528 | 264.374136 | 264.3655264 | 264.0984192 | 261.1458824 |
| 264.387232 | 264.3928688 | 264.3960528 | 264.374136 | 264.3635264 | 264.0964192 | 261.1438824 |
| 264.387232 | 264.3938688 | 264.3950528 | 264.374136 | 264.3635264 | 264.0974192 | 261.1448824 |
| 264.387232 | 264.3928688 | 264.3960528 | 264.374136 | 264.3635264 | 264.0964192 | 261.1428824 |
| 264.389232 | 264.3928688 | 264.3950528 | 264.375136 | 264.3655264 | 264.0984192 | 261.1428824 |
| 264.386232 | 264.3938688 | 264.3940528 | 264.373136 | 264.3635264 | 264.0984192 | 261.1418824 |
| 264.389232 | 264.3948688 | 264.3970528 | 264.376136 | 264.3675264 | 264.1004192 | 261.1428824 |
| 264.390232 | 264.3938688 | 264.3960528 | 264.375136 | 264.3665264 | 264.0974192 | 261.1438824 |
| 264.391232 | 264.3948688 | 264.3940528 | 264.378136 | 264.3675264 | 264.0994192 | 261.1418824 |
| 264.388232 | 264.3948688 | 264.3930528 | 264.377136 | 264.3665264 | 264.1014192 | 261.1408824 |
| 264.394232 | 264.3988688 | 264.3930528 | 264.380136 | 264.3715264 | 264.1044192 | 261.1408824 |
| 264.394232 | 264.3988688 | 264.3930528 | 264.381136 | 264.3715264 | 264.1044192 | 261.1388824 |
| 264.398232 | 264.4018688 | 264.3930528 | 264.384136 | 264.3765264 | 264.1074192 | 261.1388824 |
| 264.398232 | 264.4008688 | 264.3940528 | 264.385136 | 264.3765264 | 264.1104192 | 261.1358824 |
| 264.400232 | 264.4038688 | 264.3940528 | 264.389136 | 264.3815264 | 264.1134192 | 261.1378824 |
| 264.403232 | 264.4068688 | 264.3950528 | 264.392136 | 264.3825264 | 264.1184192 | 261.1368824 |
| 264.407232 | 264.4078688 | 264.3950528 | 264.394136 | 264.3845264 | 264.1224192 | 261.1358824 |
| 264.410232 | 264.4108688 | 264.3950528 | 264.395136 | 264.3875264 | 264.1234192 | 261.1338824 |
| 264.414232 | 264.4138688 | 264.3950528 | 264.400136 | 264.3915264 | 264.1294192 | 261.1368824 |
| 264.416232 | 264.4158688 | 264.3950528 | 264.402136 | 264.3935264 | 264.1274192 | 261.1338824 |

|            |             |             |            |             |             |             |
|------------|-------------|-------------|------------|-------------|-------------|-------------|
| 264.418232 | 264.4178688 | 264.3960528 | 264.403136 | 264.3935264 | 264.1334192 | 261.1328824 |
| 264.421232 | 264.4208688 | 264.3970528 | 264.408136 | 264.3985264 | 264.1364192 | 261.1338824 |
| 264.419232 | 264.4208688 | 264.3970528 | 264.407136 | 264.3985264 | 264.1344192 | 261.1308824 |
| 264.423232 | 264.4218688 | 264.4000528 | 264.408136 | 264.4015264 | 264.1384192 | 261.1318824 |
| 264.424232 | 264.4218688 | 264.3980528 | 264.410136 | 264.4015264 | 264.1384192 | 261.1308824 |
| 264.424232 | 264.4248688 | 264.4010528 | 264.409136 | 264.4025264 | 264.1424192 | 261.1318824 |
| 264.421232 | 264.4218688 | 264.3990528 | 264.407136 | 264.3985264 | 264.1364192 | 261.1278824 |
| 264.424232 | 264.4248688 | 264.3990528 | 264.409136 | 264.4025264 | 264.1384192 | 261.1318824 |
| 264.420232 | 264.4228688 | 264.3990528 | 264.408136 | 264.4005264 | 264.1384192 | 261.1318824 |
| 264.424232 | 264.4258688 | 264.4000528 | 264.409136 | 264.4035264 | 264.1394192 | 261.1328824 |
| 264.422232 | 264.4258688 | 264.4010528 | 264.410136 | 264.4035264 | 264.1404192 | 261.1328824 |
| 264.423232 | 264.4268688 | 264.4030528 | 264.411136 | 264.4045264 | 264.1404192 | 261.1348824 |
| 264.423232 | 264.4258688 | 264.4030528 | 264.408136 | 264.4025264 | 264.1384192 | 261.1338824 |
| 264.421232 | 264.4238688 | 264.4040528 | 264.410136 | 264.4025264 | 264.1404192 | 261.1348824 |
| 264.423232 | 264.4268688 | 264.4060528 | 264.410136 | 264.4005264 | 264.1364192 | 261.1368824 |
| 264.424232 | 264.4248688 | 264.4030528 | 264.411136 | 264.4015264 | 264.1354192 | 261.1408824 |
| 264.420232 | 264.4248688 | 264.4040528 | 264.408136 | 264.3985264 | 264.1364192 | 261.1398824 |
| 264.418232 | 264.4238688 | 264.4050528 | 264.404136 | 264.3985264 | 264.1334192 | 261.1408824 |
| 264.418232 | 264.4218688 | 264.4030528 | 264.404136 | 264.3965264 | 264.1314192 | 261.1408824 |
| 264.417232 | 264.4208688 | 264.4060528 | 264.404136 | 264.3975264 | 264.1304192 | 261.1438824 |
| 264.421232 | 264.4228688 | 264.4040528 | 264.410136 | 264.4025264 | 264.1294192 | 261.1438824 |
| 264.422232 | 264.4258688 | 264.4040528 | 264.412136 | 264.4025264 | 264.1284192 | 261.1448824 |
| 264.425232 | 264.4258688 | 264.4060528 | 264.409136 | 264.4035264 | 264.1334192 | 261.1468824 |
| 264.421232 | 264.4238688 | 264.4050528 | 264.406136 | 264.3995264 | 264.1334192 | 261.1448824 |
| 264.420232 | 264.4238688 | 264.4060528 | 264.407136 | 264.3995264 | 264.1364192 | 261.1478824 |
| 264.420232 | 264.4238688 | 264.4050528 | 264.407136 | 264.3975264 | 264.1324192 | 261.1468824 |
| 264.421232 | 264.4248688 | 264.4060528 | 264.407136 | 264.3985264 | 264.1344192 | 261.1498824 |
| 264.416232 | 264.4228688 | 264.4050528 | 264.404136 | 264.3955264 | 264.1314192 | 261.1498824 |
| 264.419232 | 264.4208688 | 264.4050528 | 264.406136 | 264.3975264 | 264.1294192 | 261.1478824 |
| 264.420232 | 264.4218688 | 264.4060528 | 264.407136 | 264.3985264 | 264.1324192 | 261.1498824 |
| 264.418232 | 264.4218688 | 264.4060528 | 264.407136 | 264.3975264 | 264.1284192 | 261.1488824 |
| 264.417232 | 264.4218688 | 264.4050528 | 264.405136 | 264.3985264 | 264.1294192 | 261.1478824 |
| 264.417232 | 264.4218688 | 264.4050528 | 264.405136 | 264.3985264 | 264.1274192 | 261.1498824 |
| 264.419232 | 264.4208688 | 264.4060528 | 264.405136 | 264.3975264 | 264.1294192 | 261.1498824 |
| 264.418232 | 264.4208688 | 264.4050528 | 264.406136 | 264.3995264 | 264.1304192 | 261.1518824 |
| 264.416232 | 264.4188688 | 264.4050528 | 264.402136 | 264.3965264 | 264.1264192 | 261.1508824 |
| 264.414232 | 264.4188688 | 264.4070528 | 264.401136 | 264.3945264 | 264.1274192 | 261.1488824 |
| 264.417232 | 264.4188688 | 264.4060528 | 264.403136 | 264.3975264 | 264.1274192 | 261.1478824 |
| 264.414232 | 264.4178688 | 264.4030528 | 264.400136 | 264.3945264 | 264.1254192 | 261.1468824 |
| 264.415232 | 264.4188688 | 264.4060528 | 264.400136 | 264.3935264 | 264.1254192 | 261.1498824 |
| 264.414232 | 264.4188688 | 264.4040528 | 264.398136 | 264.3915264 | 264.1264192 | 261.1478824 |
| 264.413232 | 264.4168688 | 264.4060528 | 264.398136 | 264.3915264 | 264.1244192 | 261.1478824 |
| 264.415232 | 264.4168688 | 264.4060528 | 264.400136 | 264.3935264 | 264.1234192 | 261.1498824 |
| 264.413232 | 264.4158688 | 264.4040528 | 264.398136 | 264.3905264 | 264.1234192 | 261.1498824 |
| 264.415232 | 264.4188688 | 264.4060528 | 264.402136 | 264.3955264 | 264.1234192 | 261.1498824 |
| 264.413232 | 264.4168688 | 264.4040528 | 264.398136 | 264.3895264 | 264.1244192 | 261.1498824 |
| 264.414232 | 264.4188688 | 264.4050528 | 264.401136 | 264.3945264 | 264.1234192 | 261.1508824 |

|            |             |             |            |             |             |             |
|------------|-------------|-------------|------------|-------------|-------------|-------------|
| 264.415232 | 264.4168688 | 264.4080528 | 264.403136 | 264.3925264 | 264.1254192 | 261.1518824 |
| 264.414232 | 264.4148688 | 264.4050528 | 264.399136 | 264.3925264 | 264.1234192 | 261.1528824 |
| 264.410232 | 264.4138688 | 264.4050528 | 264.399136 | 264.3905264 | 264.1224192 | 261.1488824 |
| 264.413232 | 264.4178688 | 264.4060528 | 264.401136 | 264.3945264 | 264.1234192 | 261.1508824 |
| 264.410232 | 264.4138688 | 264.4050528 | 264.398136 | 264.3905264 | 264.1234192 | 261.1488824 |
| 264.413232 | 264.4148688 | 264.4050528 | 264.398136 | 264.3925264 | 264.1254192 | 261.1508824 |
| 264.411232 | 264.4148688 | 264.4060528 | 264.397136 | 264.3915264 | 264.1244192 | 261.1518824 |
| 264.414232 | 264.4148688 | 264.4060528 | 264.400136 | 264.3935264 | 264.1244192 | 261.1518824 |
| 264.412232 | 264.4158688 | 264.4050528 | 264.399136 | 264.3895264 | 264.1244192 | 261.1498824 |
| 264.411232 | 264.4168688 | 264.4040528 | 264.399136 | 264.3915264 | 264.1234192 | 261.1488824 |
| 264.413232 | 264.4168688 | 264.4050528 | 264.401136 | 264.3935264 | 264.1234192 | 261.1488824 |
| 264.414232 | 264.4148688 | 264.4050528 | 264.399136 | 264.3925264 | 264.1224192 | 261.1508824 |
| 264.412232 | 264.4148688 | 264.4050528 | 264.401136 | 264.3945264 | 264.1244192 | 261.1478824 |
| 264.413232 | 264.4158688 | 264.4020528 | 264.402136 | 264.3935264 | 264.1224192 | 261.1468824 |
| 264.413232 | 264.4158688 | 264.4040528 | 264.400136 | 264.3935264 | 264.1254192 | 261.1468824 |
| 264.417232 | 264.4158688 | 264.4060528 | 264.403136 | 264.3955264 | 264.1264192 | 261.1498824 |
| 264.416232 | 264.4168688 | 264.4070528 | 264.403136 | 264.3965264 | 264.1284192 | 261.1478824 |
| 264.418232 | 264.4188688 | 264.4070528 | 264.405136 | 264.3975264 | 264.1274192 | 261.1478824 |
| 264.419232 | 264.4188688 | 264.4070528 | 264.405136 | 264.3975264 | 264.1294192 | 261.1498824 |
| 264.418232 | 264.4188688 | 264.4050528 | 264.406136 | 264.3975264 | 264.1274192 | 261.1498824 |
| 264.419232 | 264.4188688 | 264.4050528 | 264.405136 | 264.3975264 | 264.1274192 | 261.1478824 |
| 264.422232 | 264.4228688 | 264.4060528 | 264.407136 | 264.3985264 | 264.1324192 | 261.1488824 |
| 264.420232 | 264.4208688 | 264.4060528 | 264.407136 | 264.3985264 | 264.1274192 | 261.1478824 |
| 264.421232 | 264.4218688 | 264.4080528 | 264.408136 | 264.3995264 | 264.1314192 | 261.1478824 |
| 264.421232 | 264.4198688 | 264.4030528 | 264.406136 | 264.3975264 | 264.1314192 | 261.1458824 |
| 264.424232 | 264.4228688 | 264.4080528 | 264.409136 | 264.4025264 | 264.1344192 | 261.1488824 |
| 264.420232 | 264.4198688 | 264.4040528 | 264.408136 | 264.3995264 | 264.1304192 | 261.1468824 |
| 264.422232 | 264.4248688 | 264.4060528 | 264.411136 | 264.4045264 | 264.1364192 | 261.1478824 |
| 264.424232 | 264.4228688 | 264.4080528 | 264.411136 | 264.4025264 | 264.1324192 | 261.1488824 |
| 264.423232 | 264.4218688 | 264.4050528 | 264.409136 | 264.4015264 | 264.1334192 | 261.1478824 |
| 264.423232 | 264.4248688 | 264.4070528 | 264.411136 | 264.4035264 | 264.1334192 | 261.1468824 |
| 264.423232 | 264.4248688 | 264.4070528 | 264.413136 | 264.4055264 | 264.1354192 | 261.1478824 |
| 264.423232 | 264.4248688 | 264.4060528 | 264.413136 | 264.4055264 | 264.1374192 | 261.1468824 |
| 264.425232 | 264.4248688 | 264.4090528 | 264.413136 | 264.4065264 | 264.1354192 | 261.1458824 |
| 264.428232 | 264.4278688 | 264.4080528 | 264.414136 | 264.4075264 | 264.1384192 | 261.1478824 |
| 264.426232 | 264.4278688 | 264.4080528 | 264.414136 | 264.4075264 | 264.1384192 | 261.1478824 |
| 264.428232 | 264.4288688 | 264.4080528 | 264.415136 | 264.4075264 | 264.1394192 | 261.1488824 |
| 264.429232 | 264.4288688 | 264.4080528 | 264.415136 | 264.4075264 | 264.1394192 | 261.1508824 |
| 264.428232 | 264.4278688 | 264.4100528 | 264.414136 | 264.4075264 | 264.1374192 | 261.1478824 |
| 264.425232 | 264.4288688 | 264.4090528 | 264.414136 | 264.4075264 | 264.1394192 | 261.1518824 |
| 264.425232 | 264.4268688 | 264.4090528 | 264.414136 | 264.4055264 | 264.1394192 | 261.1488824 |
| 264.424232 | 264.4258688 | 264.4080528 | 264.410136 | 264.4035264 | 264.1354192 | 261.1498824 |
| 264.422232 | 264.4238688 | 264.4080528 | 264.410136 | 264.4025264 | 264.1354192 | 261.1488824 |
| 264.424232 | 264.4238688 | 264.4090528 | 264.412136 | 264.4035264 | 264.1354192 | 261.1518824 |
| 264.423232 | 264.4258688 | 264.4110528 | 264.408136 | 264.4015264 | 264.1334192 | 261.1518824 |
| 264.421232 | 264.4238688 | 264.4090528 | 264.408136 | 264.4015264 | 264.1334192 | 261.1518824 |
| 264.420232 | 264.4228688 | 264.4090528 | 264.408136 | 264.4015264 | 264.1294192 | 261.1518824 |

|            |             |             |            |             |             |             |
|------------|-------------|-------------|------------|-------------|-------------|-------------|
| 264.417232 | 264.4218688 | 264.4100528 | 264.406136 | 264.3995264 | 264.1294192 | 261.1528824 |
| 264.419232 | 264.4208688 | 264.4100528 | 264.406136 | 264.3955264 | 264.1294192 | 261.1528824 |
| 264.415232 | 264.4208688 | 264.4100528 | 264.401136 | 264.3945264 | 264.1254192 | 261.1528824 |
| 264.415232 | 264.4188688 | 264.4100528 | 264.403136 | 264.3975264 | 264.1274192 | 261.1528824 |
| 264.415232 | 264.4208688 | 264.4080528 | 264.403136 | 264.3935264 | 264.1254192 | 261.1538824 |
| 264.411232 | 264.4158688 | 264.4100528 | 264.398136 | 264.3925264 | 264.1214192 | 261.1528824 |
| 264.413232 | 264.4188688 | 264.4090528 | 264.399136 | 264.3935264 | 264.1214192 | 261.1558824 |
| 264.409232 | 264.4158688 | 264.4080528 | 264.396136 | 264.3905264 | 264.1174192 | 261.1558824 |
| 264.409232 | 264.4138688 | 264.4110528 | 264.394136 | 264.3865264 | 264.1194192 | 261.1538824 |
| 264.408232 | 264.4128688 | 264.4080528 | 264.393136 | 264.3885264 | 264.1174192 | 261.1538824 |
| 264.405232 | 264.4128688 | 264.4090528 | 264.391136 | 264.3855264 | 264.1154192 | 261.1538824 |
| 264.406232 | 264.4108688 | 264.4070528 | 264.387136 | 264.3825264 | 264.1134192 | 261.1548824 |
| 264.402232 | 264.4078688 | 264.4040528 | 264.388136 | 264.3835264 | 264.1124192 | 261.1528824 |
| 264.405232 | 264.4088688 | 264.4050528 | 264.389136 | 264.3825264 | 264.1114192 | 261.1548824 |
| 264.401232 | 264.4068688 | 264.4050528 | 264.384136 | 264.3795264 | 264.1074192 | 261.1538824 |
| 264.399232 | 264.4068688 | 264.4050528 | 264.384136 | 264.3775264 | 264.1074192 | 261.1548824 |
| 264.399232 | 264.4058688 | 264.4050528 | 264.386136 | 264.3775264 | 264.1094192 | 261.1538824 |
| 264.399232 | 264.4038688 | 264.4050528 | 264.385136 | 264.3785264 | 264.1084192 | 261.1548824 |
| 264.398232 | 264.4038688 | 264.4040528 | 264.384136 | 264.3765264 | 264.1064192 | 261.1558824 |
| 264.397232 | 264.4048688 | 264.4030528 | 264.383136 | 264.3765264 | 264.1074192 | 261.1538824 |
| 264.399232 | 264.4038688 | 264.4030528 | 264.385136 | 264.3745264 | 264.1074192 | 261.1528824 |
| 264.397232 | 264.4018688 | 264.4030528 | 264.383136 | 264.3745264 | 264.1054192 | 261.1538824 |
| 264.397232 | 264.3998688 | 264.4030528 | 264.381136 | 264.3725264 | 264.1064192 | 261.1508824 |
| 264.395232 | 264.3998688 | 264.4030528 | 264.380136 | 264.3705264 | 264.1054192 | 261.1508824 |
| 264.396232 | 264.3998688 | 264.4020528 | 264.382136 | 264.3735264 | 264.1064192 | 261.1518824 |
| 264.392232 | 264.3978688 | 264.4010528 | 264.379136 | 264.3685264 | 264.1024192 | 261.1508824 |
| 264.391232 | 264.3968688 | 264.3990528 | 264.378136 | 264.3685264 | 264.1034192 | 261.1488824 |
| 264.389232 | 264.3958688 | 264.3990528 | 264.375136 | 264.3675264 | 264.1034192 | 261.1488824 |
| 264.390232 | 264.3968688 | 264.4010528 | 264.377136 | 264.3675264 | 264.1034192 | 261.1478824 |
| 264.389232 | 264.3948688 | 264.3990528 | 264.376136 | 264.3685264 | 264.1024192 | 261.1468824 |
| 264.391232 | 264.3948688 | 264.3990528 | 264.374136 | 264.3665264 | 264.1044192 | 261.1468824 |
| 264.392232 | 264.3948688 | 264.3990528 | 264.376136 | 264.3685264 | 264.1024192 | 261.1438824 |
| 264.391232 | 264.3938688 | 264.3990528 | 264.376136 | 264.3685264 | 264.1014192 | 261.1438824 |
| 264.392232 | 264.3968688 | 264.3980528 | 264.377136 | 264.3685264 | 264.1034192 | 261.1448824 |
| 264.388232 | 264.3938688 | 264.3980528 | 264.375136 | 264.3655264 | 264.0994192 | 261.1408824 |
| 264.389232 | 264.3938688 | 264.3970528 | 264.376136 | 264.3665264 | 264.1024192 | 261.1418824 |
| 264.392232 | 264.3958688 | 264.3990528 | 264.377136 | 264.3675264 | 264.1044192 | 261.1448824 |
| 264.392232 | 264.3958688 | 264.3980528 | 264.375136 | 264.3685264 | 264.1044192 | 261.1438824 |
| 264.390232 | 264.3958688 | 264.3950528 | 264.376136 | 264.3685264 | 264.1044192 | 261.1428824 |
| 264.392232 | 264.3958688 | 264.3950528 | 264.376136 | 264.3685264 | 264.1054192 | 261.1408824 |
| 264.397232 | 264.3998688 | 264.3980528 | 264.383136 | 264.3745264 | 264.1074192 | 261.1428824 |
| 264.397232 | 264.3998688 | 264.3960528 | 264.384136 | 264.3745264 | 264.1104192 | 261.1408824 |
| 264.398232 | 264.4018688 | 264.3940528 | 264.386136 | 264.3765264 | 264.1104192 | 261.1408824 |
| 264.404232 | 264.4048688 | 264.3960528 | 264.391136 | 264.3815264 | 264.1164192 | 261.1408824 |
| 264.403232 | 264.4058688 | 264.3970528 | 264.390136 | 264.3805264 | 264.1174192 | 261.1398824 |
| 264.405232 | 264.4068688 | 264.3960528 | 264.393136 | 264.3865264 | 264.1214192 | 261.1378824 |
| 264.407232 | 264.4098688 | 264.3980528 | 264.395136 | 264.3865264 | 264.1234192 | 261.1388824 |

|            |             |             |            |             |             |             |
|------------|-------------|-------------|------------|-------------|-------------|-------------|
| 264.413232 | 264.4138688 | 264.3980528 | 264.399136 | 264.3905264 | 264.1304192 | 261.1378824 |
| 264.413232 | 264.4148688 | 264.3990528 | 264.402136 | 264.3915264 | 264.1304192 | 261.1378824 |
| 264.415232 | 264.4148688 | 264.3980528 | 264.398136 | 264.3895264 | 264.1284192 | 261.1338824 |
| 264.416232 | 264.4148688 | 264.3980528 | 264.403136 | 264.3935264 | 264.1324192 | 261.1348824 |
| 264.416232 | 264.4168688 | 264.3980528 | 264.403136 | 264.3945264 | 264.1324192 | 261.1338824 |
| 264.420232 | 264.4188688 | 264.3990528 | 264.407136 | 264.3995264 | 264.1364192 | 261.1358824 |
| 264.418232 | 264.4188688 | 264.3980528 | 264.405136 | 264.3955264 | 264.1354192 | 261.1308824 |
| 264.421232 | 264.4208688 | 264.4000528 | 264.408136 | 264.3985264 | 264.1374192 | 261.1308824 |
| 264.422232 | 264.4208688 | 264.4000528 | 264.409136 | 264.4005264 | 264.1374192 | 261.1338824 |
| 264.424232 | 264.4218688 | 264.4010528 | 264.411136 | 264.4025264 | 264.1404192 | 261.1318824 |
| 264.425232 | 264.4238688 | 264.3980528 | 264.411136 | 264.4015264 | 264.1424192 | 261.1338824 |
| 264.424232 | 264.4248688 | 264.4000528 | 264.410136 | 264.4025264 | 264.1434192 | 261.1318824 |
| 264.426232 | 264.4248688 | 264.4020528 | 264.410136 | 264.4025264 | 264.1434192 | 261.1328824 |
| 264.426232 | 264.4238688 | 264.4020528 | 264.413136 | 264.4055264 | 264.1414192 | 261.1368824 |
| 264.426232 | 264.4228688 | 264.4000528 | 264.412136 | 264.4055264 | 264.1404192 | 261.1348824 |
| 264.429232 | 264.4288688 | 264.4050528 | 264.415136 | 264.4075264 | 264.1464192 | 261.1408824 |
| 264.431232 | 264.4298688 | 264.4070528 | 264.417136 | 264.4115264 | 264.1474192 | 261.1418824 |
| 264.433232 | 264.4298688 | 264.4050528 | 264.419136 | 264.4115264 | 264.1484192 | 261.1428824 |
| 264.438232 | 264.4298688 | 264.4050528 | 264.427136 | 264.4205264 | 264.1484192 | 261.1458824 |
| 264.454232 | 264.4428688 | 264.4060528 | 264.445136 | 264.4345264 | 264.1534192 | 261.1468824 |
| 264.473232 | 264.4578688 | 264.4060528 | 264.465136 | 264.4525264 | 264.1724192 | 261.1488824 |
| 264.498232 | 264.4708688 | 264.4090528 | 264.488136 | 264.4715264 | 264.2044192 | 261.1538824 |
| 264.518232 | 264.4868688 | 264.4130528 | 264.508136 | 264.4905264 | 264.2464192 | 261.1558824 |
| 264.533232 | 264.4988688 | 264.4170528 | 264.522136 | 264.5015264 | 264.2864192 | 261.1558824 |
| 264.547232 | 264.5108688 | 264.4190528 | 264.539136 | 264.5175264 | 264.3184192 | 261.1598824 |
| 264.558232 | 264.5198688 | 264.4230528 | 264.546136 | 264.5255264 | 264.3384192 | 261.1668824 |
| 264.567232 | 264.5278688 | 264.4250528 | 264.554136 | 264.5365264 | 264.3584192 | 261.1668824 |
| 264.577232 | 264.5378688 | 264.4290528 | 264.565136 | 264.5465264 | 264.3804192 | 261.1708824 |
| 264.589232 | 264.5448688 | 264.4310528 | 264.577136 | 264.5605264 | 264.3984192 | 261.1768824 |
| 264.601232 | 264.5568688 | 264.4360528 | 264.593136 | 264.5745264 | 264.4154192 | 261.1828824 |
| 264.613232 | 264.5678688 | 264.4350528 | 264.604136 | 264.5835264 | 264.4364192 | 261.1958824 |
| 264.628232 | 264.5778688 | 264.4410528 | 264.616136 | 264.5985264 | 264.4584192 | 261.2078824 |
| 264.638232 | 264.5878688 | 264.4420528 | 264.629136 | 264.6095264 | 264.4754192 | 261.2148824 |
| 264.647232 | 264.5968688 | 264.4470528 | 264.638136 | 264.6195264 | 264.4924192 | 261.2268824 |
| 264.656232 | 264.6068688 | 264.4510528 | 264.645136 | 264.6305264 | 264.5044192 | 261.2348824 |
| 264.661232 | 264.6118688 | 264.4500528 | 264.650136 | 264.6345264 | 264.5114192 | 261.2408824 |
| 264.666232 | 264.6198688 | 264.4550528 | 264.657136 | 264.6425264 | 264.5164192 | 261.2528824 |
| 264.671232 | 264.6238688 | 264.4600528 | 264.661136 | 264.6475264 | 264.5194192 | 261.2638824 |
| 264.671232 | 264.6268688 | 264.4620528 | 264.659136 | 264.6475264 | 264.5154192 | 261.2668824 |
| 264.673232 | 264.6318688 | 264.4640528 | 264.660136 | 264.6485264 | 264.5124192 | 261.2728824 |
| 264.670232 | 264.6318688 | 264.4670528 | 264.663136 | 264.6485264 | 264.5024192 | 261.2788824 |
| 264.671232 | 264.6348688 | 264.4690528 | 264.660136 | 264.6495264 | 264.4994192 | 261.2848824 |
| 264.670232 | 264.6338688 | 264.4730528 | 264.656136 | 264.6475264 | 264.4864192 | 261.2898824 |
| 264.668232 | 264.6348688 | 264.4760528 | 264.657136 | 264.6485264 | 264.4764192 | 261.2948824 |
| 264.663232 | 264.6308688 | 264.4770528 | 264.650136 | 264.6405264 | 264.4614192 | 261.2948824 |
| 264.660232 | 264.6318688 | 264.4820528 | 264.649136 | 264.6415264 | 264.4514192 | 261.2988824 |
| 264.657232 | 264.6308688 | 264.4840528 | 264.648136 | 264.6385264 | 264.4414192 | 261.3008824 |

|            |             |             |            |             |             |             |
|------------|-------------|-------------|------------|-------------|-------------|-------------|
| 264.655232 | 264.6288688 | 264.4850528 | 264.643136 | 264.6375264 | 264.4314192 | 261.3028824 |
| 264.650232 | 264.6268688 | 264.4870528 | 264.641136 | 264.6345264 | 264.4194192 | 261.3038824 |
| 264.649232 | 264.6268688 | 264.4870528 | 264.639136 | 264.6315264 | 264.4074192 | 261.3048824 |
| 264.644232 | 264.6248688 | 264.4880528 | 264.635136 | 264.6305264 | 264.4004192 | 261.3078824 |
| 264.642232 | 264.6228688 | 264.4900528 | 264.633136 | 264.6275264 | 264.3914192 | 261.3058824 |
| 264.637232 | 264.6188688 | 264.4910528 | 264.627136 | 264.6245264 | 264.3794192 | 261.3028824 |
| 264.638232 | 264.6228688 | 264.4950528 | 264.628136 | 264.6235264 | 264.3774192 | 261.3078824 |
| 264.633232 | 264.6188688 | 264.4940528 | 264.624136 | 264.6205264 | 264.3704192 | 261.3048824 |
| 264.631232 | 264.6168688 | 264.4960528 | 264.621136 | 264.6195264 | 264.3634192 | 261.3028824 |
| 264.631232 | 264.6188688 | 264.4970528 | 264.622136 | 264.6205264 | 264.3594192 | 261.3028824 |
| 264.631232 | 264.6168688 | 264.4980528 | 264.622136 | 264.6165264 | 264.3534192 | 261.3038824 |
| 264.627232 | 264.6168688 | 264.5000528 | 264.619136 | 264.6155264 | 264.3484192 | 261.3008824 |
| 264.625232 | 264.6138688 | 264.4980528 | 264.615136 | 264.6135264 | 264.3444192 | 261.2978824 |
| 264.627232 | 264.6148688 | 264.5030528 | 264.617136 | 264.6125264 | 264.3444192 | 261.3008824 |
| 264.622232 | 264.6118688 | 264.5020528 | 264.614136 | 264.6105264 | 264.3374192 | 261.2998824 |
| 264.622232 | 264.6128688 | 264.5060528 | 264.613136 | 264.6095264 | 264.3384192 | 261.3008824 |
| 264.619232 | 264.6098688 | 264.5070528 | 264.610136 | 264.6075264 | 264.3314192 | 261.2978824 |
| 264.619232 | 264.6088688 | 264.5060528 | 264.610136 | 264.6075264 | 264.3254192 | 261.2968824 |
| 264.614232 | 264.6068688 | 264.5070528 | 264.605136 | 264.6045264 | 264.3204192 | 261.2938824 |
| 264.615232 | 264.6078688 | 264.5100528 | 264.605136 | 264.6035264 | 264.3214192 | 261.2968824 |
| 264.615232 | 264.6048688 | 264.5110528 | 264.603136 | 264.6005264 | 264.3174192 | 261.2948824 |
| 264.613232 | 264.6078688 | 264.5130528 | 264.602136 | 264.6025264 | 264.3144192 | 261.2978824 |
| 264.608232 | 264.6028688 | 264.5120528 | 264.599136 | 264.5975264 | 264.3074192 | 261.2928824 |
| 264.607232 | 264.6008688 | 264.5100528 | 264.597136 | 264.5935264 | 264.3064192 | 261.2918824 |
| 264.603232 | 264.6008688 | 264.5110528 | 264.592136 | 264.5895264 | 264.3034192 | 261.2908824 |
| 264.604232 | 264.5958688 | 264.5120528 | 264.590136 | 264.5875264 | 264.2984192 | 261.2908824 |
| 264.599232 | 264.5938688 | 264.5130528 | 264.590136 | 264.5855264 | 264.2934192 | 261.2888824 |
| 264.596232 | 264.5928688 | 264.5110528 | 264.586136 | 264.5815264 | 264.2894192 | 261.2848824 |
| 264.596232 | 264.5938688 | 264.5120528 | 264.586136 | 264.5825264 | 264.2844192 | 261.2878824 |
| 264.594232 | 264.5908688 | 264.5160528 | 264.582136 | 264.5775264 | 264.2844192 | 261.2878824 |
| 264.593232 | 264.5908688 | 264.5140528 | 264.582136 | 264.5775264 | 264.2784192 | 261.2848824 |
| 264.590232 | 264.5868688 | 264.5150528 | 264.579136 | 264.5745264 | 264.2754192 | 261.2838824 |
| 264.588232 | 264.5838688 | 264.5140528 | 264.576136 | 264.5745264 | 264.2734192 | 261.2808824 |
| 264.586232 | 264.5838688 | 264.5170528 | 264.576136 | 264.5725264 | 264.2714192 | 261.2828824 |
| 264.582232 | 264.5808688 | 264.5170528 | 264.572136 | 264.5685264 | 264.2694192 | 261.2788824 |
| 264.582232 | 264.5808688 | 264.5180528 | 264.572136 | 264.5685264 | 264.2654192 | 261.2778824 |
| 264.580232 | 264.5778688 | 264.5170528 | 264.571136 | 264.5635264 | 264.2624192 | 261.2758824 |
| 264.577232 | 264.5778688 | 264.5150528 | 264.567136 | 264.5615264 | 264.2584192 | 261.2748824 |
| 264.576232 | 264.5738688 | 264.5140528 | 264.564136 | 264.5615264 | 264.2564192 | 261.2738824 |
| 264.576232 | 264.5758688 | 264.5170528 | 264.564136 | 264.5595264 | 264.2524192 | 261.2718824 |
| 264.572232 | 264.5738688 | 264.5170528 | 264.560136 | 264.5575264 | 264.2524192 | 261.2718824 |
| 264.570232 | 264.5718688 | 264.5170528 | 264.558136 | 264.5555264 | 264.2514192 | 261.2688824 |
| 264.568232 | 264.5688688 | 264.5170528 | 264.555136 | 264.5525264 | 264.2484192 | 261.2688824 |
| 264.566232 | 264.5658688 | 264.5150528 | 264.554136 | 264.5505264 | 264.2424192 | 261.2668824 |
| 264.566232 | 264.5678688 | 264.5150528 | 264.554136 | 264.5485264 | 264.2404192 | 261.2658824 |
| 264.566232 | 264.5658688 | 264.5180528 | 264.552136 | 264.5465264 | 264.2424192 | 261.2648824 |
| 264.564232 | 264.5628688 | 264.5180528 | 264.550136 | 264.5455264 | 264.2404192 | 261.2638824 |

|            |             |             |            |             |             |             |
|------------|-------------|-------------|------------|-------------|-------------|-------------|
| 264.560232 | 264.5598688 | 264.5140528 | 264.546136 | 264.5405264 | 264.2344192 | 261.2608824 |
| 264.558232 | 264.5598688 | 264.5160528 | 264.544136 | 264.5385264 | 264.2324192 | 261.2608824 |
| 264.556232 | 264.5598688 | 264.5160528 | 264.542136 | 264.5405264 | 264.2304192 | 261.2588824 |
| 264.553232 | 264.5548688 | 264.5150528 | 264.541136 | 264.5365264 | 264.2304192 | 261.2568824 |
| 264.549232 | 264.5518688 | 264.5140528 | 264.534136 | 264.5325264 | 264.2254192 | 261.2548824 |
| 264.544232 | 264.5478688 | 264.5130528 | 264.530136 | 264.5255264 | 264.2184192 | 261.2528824 |
| 264.544232 | 264.5478688 | 264.5110528 | 264.530136 | 264.5265264 | 264.2174192 | 261.2538824 |
| 264.544232 | 264.5458688 | 264.5130528 | 264.530136 | 264.5255264 | 264.2154192 | 261.2518824 |
| 264.542232 | 264.5448688 | 264.5130528 | 264.525136 | 264.5205264 | 264.2114192 | 261.2498824 |
| 264.540232 | 264.5428688 | 264.5110528 | 264.525136 | 264.5225264 | 264.2094192 | 261.2498824 |
| 264.540232 | 264.5428688 | 264.5120528 | 264.525136 | 264.5205264 | 264.2074192 | 261.2478824 |
| 264.536232 | 264.5398688 | 264.5110528 | 264.520136 | 264.5165264 | 264.2074192 | 261.2468824 |
| 264.537232 | 264.5418688 | 264.5110528 | 264.523136 | 264.5175264 | 264.2084192 | 261.2458824 |
| 264.532232 | 264.5358688 | 264.5080528 | 264.518136 | 264.5125264 | 264.2054192 | 261.2428824 |
| 264.532232 | 264.5378688 | 264.5100528 | 264.518136 | 264.5125264 | 264.2034192 | 261.2458824 |
| 264.530232 | 264.5358688 | 264.5100528 | 264.518136 | 264.5125264 | 264.2034192 | 261.2428824 |
| 264.527232 | 264.5328688 | 264.5080528 | 264.513136 | 264.5095264 | 264.1974192 | 261.2398824 |
| 264.525232 | 264.5298688 | 264.5080528 | 264.511136 | 264.5065264 | 264.1964192 | 261.2368824 |
| 264.528232 | 264.5328688 | 264.5110528 | 264.514136 | 264.5085264 | 264.1954192 | 261.2388824 |
| 264.525232 | 264.5308688 | 264.5090528 | 264.509136 | 264.5035264 | 264.1944192 | 261.2368824 |
| 264.521232 | 264.5268688 | 264.5080528 | 264.507136 | 264.5025264 | 264.1884192 | 261.2328824 |
| 264.521232 | 264.5248688 | 264.5080528 | 264.505136 | 264.5025264 | 264.1914192 | 261.2328824 |
| 264.519232 | 264.5248688 | 264.5060528 | 264.505136 | 264.5005264 | 264.1884192 | 261.2328824 |
| 264.518232 | 264.5218688 | 264.5060528 | 264.502136 | 264.4995264 | 264.1884192 | 261.2298824 |
| 264.516232 | 264.5238688 | 264.5060528 | 264.502136 | 264.4975264 | 264.1884192 | 261.2298824 |
| 264.514232 | 264.5208688 | 264.5050528 | 264.500136 | 264.4945264 | 264.1864192 | 261.2278824 |
| 264.514232 | 264.5208688 | 264.5050528 | 264.500136 | 264.4945264 | 264.1834192 | 261.2268824 |
| 264.509232 | 264.5158688 | 264.5020528 | 264.494136 | 264.4915264 | 264.1824192 | 261.2208824 |
| 264.508232 | 264.5158688 | 264.5020528 | 264.497136 | 264.4885264 | 264.1794192 | 261.2228824 |
| 264.510232 | 264.5148688 | 264.5010528 | 264.495136 | 264.4875264 | 264.1814192 | 261.2208824 |
| 264.509232 | 264.5148688 | 264.5020528 | 264.493136 | 264.4875264 | 264.1804192 | 261.2208824 |
| 264.508232 | 264.5148688 | 264.5020528 | 264.494136 | 264.4885264 | 264.1794192 | 261.2208824 |
| 264.506232 | 264.5118688 | 264.4990528 | 264.492136 | 264.4835264 | 264.1794192 | 261.2168824 |
| 264.506232 | 264.5118688 | 264.5010528 | 264.492136 | 264.4875264 | 264.1774192 | 261.2188824 |
| 264.504232 | 264.5118688 | 264.5020528 | 264.491136 | 264.4835264 | 264.1754192 | 261.2188824 |
| 264.503232 | 264.5068688 | 264.4990528 | 264.488136 | 264.4805264 | 264.1754192 | 261.2158824 |
| 264.501232 | 264.5068688 | 264.4970528 | 264.488136 | 264.4805264 | 264.1734192 | 261.2138824 |
| 264.501232 | 264.5068688 | 264.4990528 | 264.488136 | 264.4785264 | 264.1734192 | 261.2158824 |
| 264.501232 | 264.5068688 | 264.4970528 | 264.488136 | 264.4815264 | 264.1734192 | 261.2138824 |
| 264.501232 | 264.5068688 | 264.4990528 | 264.489136 | 264.4815264 | 264.1754192 | 261.2128824 |
| 264.499232 | 264.5088688 | 264.4970528 | 264.488136 | 264.4805264 | 264.1774192 | 261.2108824 |
| 264.499232 | 264.5048688 | 264.4990528 | 264.486136 | 264.4805264 | 264.1754192 | 261.2088824 |
| 264.501232 | 264.5068688 | 264.4960528 | 264.486136 | 264.4785264 | 264.1754192 | 261.2088824 |
| 264.501232 | 264.5068688 | 264.4960528 | 264.488136 | 264.4805264 | 264.1744192 | 261.2088824 |
| 264.499232 | 264.5038688 | 264.4940528 | 264.486136 | 264.4785264 | 264.1774192 | 261.2078824 |
| 264.502232 | 264.5048688 | 264.4950528 | 264.489136 | 264.4815264 | 264.1784192 | 261.2088824 |
| 264.500232 | 264.5048688 | 264.4950528 | 264.487136 | 264.4815264 | 264.1784192 | 261.2068824 |



|            |             |             |            |             |             |             |
|------------|-------------|-------------|------------|-------------|-------------|-------------|
| 264.503232 | 264.5058688 | 264.4960528 | 264.490136 | 264.4825264 | 264.1794192 | 261.2068824 |
| 264.504232 | 264.5078688 | 264.4950528 | 264.490136 | 264.4825264 | 264.1804192 | 261.2068824 |
| 264.504232 | 264.5078688 | 264.4950528 | 264.490136 | 264.4835264 | 264.1824192 | 261.2078824 |
| 264.502232 | 264.5048688 | 264.4920528 | 264.489136 | 264.4815264 | 264.1824192 | 261.2028824 |
| 264.507232 | 264.5098688 | 264.4960528 | 264.495136 | 264.4865264 | 264.1874192 | 261.2038824 |
| 264.511232 | 264.5118688 | 264.4930528 | 264.494136 | 264.4885264 | 264.1914192 | 261.2038824 |
| 264.511232 | 264.5118688 | 264.4950528 | 264.497136 | 264.4905264 | 264.1914192 | 261.2028824 |
| 264.508232 | 264.5098688 | 264.4920528 | 264.494136 | 264.4875264 | 264.1914192 | 261.2008824 |
| 264.511232 | 264.5118688 | 264.4920528 | 264.497136 | 264.4885264 | 264.1944192 | 261.2008824 |
| 264.509232 | 264.5108688 | 264.4940528 | 264.495136 | 264.4885264 | 264.1944192 | 261.2008824 |
| 264.510232 | 264.5098688 | 264.4940528 | 264.495136 | 264.4865264 | 264.1924192 | 261.1988824 |
| 264.511232 | 264.5108688 | 264.4930528 | 264.498136 | 264.4885264 | 264.1954192 | 261.2018824 |
| 264.507232 | 264.5098688 | 264.4940528 | 264.495136 | 264.4865264 | 264.1924192 | 261.2008824 |
| 264.511232 | 264.5108688 | 264.4950528 | 264.495136 | 264.4875264 | 264.1914192 | 261.2018824 |
| 264.510232 | 264.5098688 | 264.4940528 | 264.496136 | 264.4885264 | 264.1944192 | 261.2028824 |
| 264.509232 | 264.5098688 | 264.4960528 | 264.494136 | 264.4865264 | 264.1944192 | 261.2008824 |
| 264.506232 | 264.5058688 | 264.4930528 | 264.491136 | 264.4835264 | 264.1914192 | 261.2018824 |
| 264.507232 | 264.5098688 | 264.4950528 | 264.493136 | 264.4855264 | 264.1914192 | 261.2038824 |
| 264.506232 | 264.5088688 | 264.4950528 | 264.492136 | 264.4865264 | 264.1894192 | 261.2028824 |
| 264.509232 | 264.5098688 | 264.4950528 | 264.493136 | 264.4855264 | 264.1904192 | 261.2048824 |
| 264.507232 | 264.5078688 | 264.4930528 | 264.492136 | 264.4855264 | 264.1904192 | 261.2048824 |
| 264.502232 | 264.5038688 | 264.4920528 | 264.487136 | 264.4795264 | 264.1864192 | 261.2028824 |
| 264.502232 | 264.5048688 | 264.4930528 | 264.488136 | 264.4805264 | 264.1874192 | 261.2018824 |
| 264.501232 | 264.5048688 | 264.4920528 | 264.486136 | 264.4795264 | 264.1854192 | 261.2018824 |
| 264.502232 | 264.5048688 | 264.4930528 | 264.488136 | 264.4795264 | 264.1844192 | 261.2008824 |
| 264.502232 | 264.5038688 | 264.4930528 | 264.487136 | 264.4785264 | 264.1844192 | 261.2028824 |
| 264.500232 | 264.5008688 | 264.4930528 | 264.484136 | 264.4755264 | 264.1824192 | 261.2008824 |
| 264.503232 | 264.5028688 | 264.4920528 | 264.485136 | 264.4785264 | 264.1834192 | 261.2018824 |
| 264.502232 | 264.5018688 | 264.4920528 | 264.486136 | 264.4795264 | 264.1844192 | 261.2028824 |
| 264.502232 | 264.5038688 | 264.4910528 | 264.485136 | 264.4775264 | 264.1854192 | 261.2018824 |
| 264.499232 | 264.5008688 | 264.4920528 | 264.484136 | 264.4765264 | 264.1804192 | 261.2008824 |
| 264.498232 | 264.5008688 | 264.4910528 | 264.482136 | 264.4745264 | 264.1784192 | 261.2038824 |
| 264.499232 | 264.5008688 | 264.4910528 | 264.483136 | 264.4765264 | 264.1794192 | 261.2018824 |
| 264.497232 | 264.4998688 | 264.4930528 | 264.484136 | 264.4775264 | 264.1794192 | 261.2028824 |
| 264.498232 | 264.4998688 | 264.4920528 | 264.482136 | 264.4745264 | 264.1784192 | 261.1998824 |
| 264.497232 | 264.5008688 | 264.4910528 | 264.484136 | 264.4745264 | 264.1774192 | 261.1998824 |
| 264.498232 | 264.5008688 | 264.4900528 | 264.481136 | 264.4755264 | 264.1764192 | 261.2008824 |
| 264.496232 | 264.4988688 | 264.4890528 | 264.481136 | 264.4735264 | 264.1784192 | 261.1988824 |
| 264.493232 | 264.4968688 | 264.4900528 | 264.481136 | 264.4725264 | 264.1764192 | 261.1988824 |
| 264.493232 | 264.4958688 | 264.4870528 | 264.479136 | 264.4705264 | 264.1754192 | 261.1978824 |
| 264.493232 | 264.4968688 | 264.4900528 | 264.479136 | 264.4725264 | 264.1754192 | 261.1988824 |
| 264.495232 | 264.4968688 | 264.4900528 | 264.477136 | 264.4705264 | 264.1764192 | 261.1988824 |
| 264.495232 | 264.4968688 | 264.4900528 | 264.481136 | 264.4725264 | 264.1784192 | 261.1988824 |
| 264.491232 | 264.4958688 | 264.4890528 | 264.477136 | 264.4705264 | 264.1754192 | 261.1988824 |
| 264.493232 | 264.4958688 | 264.4890528 | 264.477136 | 264.4685264 | 264.1784192 | 261.1978824 |
| 264.489232 | 264.4918688 | 264.4890528 | 264.474136 | 264.4675264 | 264.1734192 | 261.1978824 |
| 264.489232 | 264.4928688 | 264.4880528 | 264.474136 | 264.4665264 | 264.1714192 | 261.1988824 |

|            |             |             |            |             |             |             |
|------------|-------------|-------------|------------|-------------|-------------|-------------|
| 264.487232 | 264.4918688 | 264.4860528 | 264.474136 | 264.4645264 | 264.1724192 | 261.1958824 |
| 264.490232 | 264.4938688 | 264.4880528 | 264.475136 | 264.4675264 | 264.1724192 | 261.1988824 |
| 264.487232 | 264.4918688 | 264.4860528 | 264.474136 | 264.4665264 | 264.1684192 | 261.1968824 |
| 264.488232 | 264.4918688 | 264.4860528 | 264.475136 | 264.4685264 | 264.1724192 | 261.1968824 |
| 264.484232 | 264.4888688 | 264.4850528 | 264.473136 | 264.4635264 | 264.1704192 | 261.1948824 |
| 264.484232 | 264.4888688 | 264.4850528 | 264.471136 | 264.4635264 | 264.1664192 | 261.1948824 |
| 264.484232 | 264.4878688 | 264.4840528 | 264.473136 | 264.4635264 | 264.1684192 | 261.1948824 |
| 264.485232 | 264.4898688 | 264.4860528 | 264.471136 | 264.4625264 | 264.1684192 | 261.1928824 |
| 264.486232 | 264.4888688 | 264.4840528 | 264.473136 | 264.4655264 | 264.1704192 | 261.1958824 |
| 264.483232 | 264.4878688 | 264.4820528 | 264.470136 | 264.4625264 | 264.1664192 | 261.1928824 |
| 264.482232 | 264.4868688 | 264.4850528 | 264.467136 | 264.4615264 | 264.1694192 | 261.1898824 |
| 264.483232 | 264.4868688 | 264.4830528 | 264.470136 | 264.4625264 | 264.1654192 | 261.1898824 |
| 264.482232 | 264.4868688 | 264.4810528 | 264.467136 | 264.4615264 | 264.1674192 | 261.1888824 |
| 264.485232 | 264.4858688 | 264.4810528 | 264.470136 | 264.4645264 | 264.1664192 | 261.1898824 |
| 264.483232 | 264.4858688 | 264.4840528 | 264.468136 | 264.4605264 | 264.1664192 | 261.1918824 |
| 264.485232 | 264.4878688 | 264.4820528 | 264.470136 | 264.4605264 | 264.1664192 | 261.1918824 |
| 264.483232 | 264.4868688 | 264.4810528 | 264.468136 | 264.4595264 | 264.1674192 | 261.1918824 |
| 264.482232 | 264.4868688 | 264.4810528 | 264.468136 | 264.4595264 | 264.1704192 | 261.1898824 |
| 264.483232 | 264.4848688 | 264.4790528 | 264.468136 | 264.4615264 | 264.1654192 | 261.1888824 |
| 264.478232 | 264.4838688 | 264.4760528 | 264.464136 | 264.4565264 | 264.1674192 | 261.1888824 |
| 264.483232 | 264.4858688 | 264.4810528 | 264.468136 | 264.4605264 | 264.1684192 | 261.1878824 |
| 264.484232 | 264.4848688 | 264.4800528 | 264.468136 | 264.4615264 | 264.1654192 | 261.1898824 |
| 264.484232 | 264.4868688 | 264.4800528 | 264.468136 | 264.4615264 | 264.1694192 | 261.1888824 |
| 264.484232 | 264.4868688 | 264.4810528 | 264.470136 | 264.4635264 | 264.1674192 | 261.1898824 |
| 264.485232 | 264.4848688 | 264.4810528 | 264.470136 | 264.4635264 | 264.1714192 | 261.1898824 |
| 264.483232 | 264.4868688 | 264.4810528 | 264.470136 | 264.4635264 | 264.1714192 | 261.1898824 |
| 264.483232 | 264.4868688 | 264.4800528 | 264.470136 | 264.4645264 | 264.1714192 | 261.1888824 |
| 264.484232 | 264.4848688 | 264.4780528 | 264.469136 | 264.4635264 | 264.1694192 | 261.1858824 |
| 264.485232 | 264.4878688 | 264.4810528 | 264.472136 | 264.4645264 | 264.1744192 | 261.1888824 |
| 264.485232 | 264.4878688 | 264.4800528 | 264.472136 | 264.4645264 | 264.1734192 | 261.1888824 |
| 264.485232 | 264.4868688 | 264.4800528 | 264.472136 | 264.4655264 | 264.1754192 | 261.1878824 |
| 264.487232 | 264.4878688 | 264.4810528 | 264.472136 | 264.4665264 | 264.1764192 | 261.1888824 |
| 264.485232 | 264.4878688 | 264.4800528 | 264.472136 | 264.4665264 | 264.1764192 | 261.1878824 |
| 264.486232 | 264.4868688 | 264.4780528 | 264.472136 | 264.4655264 | 264.1754192 | 261.1858824 |
| 264.488232 | 264.4868688 | 264.4820528 | 264.472136 | 264.4635264 | 264.1794192 | 261.1878824 |
| 264.485232 | 264.4838688 | 264.4790528 | 264.471136 | 264.4665264 | 264.1764192 | 261.1848824 |
| 264.488232 | 264.4868688 | 264.4810528 | 264.474136 | 264.4655264 | 264.1794192 | 261.1868824 |
| 264.488232 | 264.4868688 | 264.4790528 | 264.476136 | 264.4655264 | 264.1794192 | 261.1878824 |
| 264.486232 | 264.4858688 | 264.4780528 | 264.471136 | 264.4645264 | 264.1794192 | 261.1818824 |
| 264.488232 | 264.4878688 | 264.4800528 | 264.473136 | 264.4645264 | 264.1794192 | 261.1848824 |
| 264.486232 | 264.4858688 | 264.4770528 | 264.472136 | 264.4655264 | 264.1774192 | 261.1838824 |
| 264.486232 | 264.4878688 | 264.4780528 | 264.475136 | 264.4685264 | 264.1794192 | 261.1848824 |
| 264.485232 | 264.4878688 | 264.4770528 | 264.472136 | 264.4635264 | 264.1794192 | 261.1838824 |
| 264.488232 | 264.4878688 | 264.4770528 | 264.473136 | 264.4655264 | 264.1774192 | 261.1858824 |
| 264.490232 | 264.4898688 | 264.4790528 | 264.475136 | 264.4675264 | 264.1794192 | 261.1888824 |
| 264.485232 | 264.4878688 | 264.4790528 | 264.473136 | 264.4655264 | 264.1794192 | 261.1878824 |
| 264.487232 | 264.4868688 | 264.4790528 | 264.473136 | 264.4655264 | 264.1784192 | 261.1878824 |

|            |             |             |            |             |             |             |
|------------|-------------|-------------|------------|-------------|-------------|-------------|
| 264.487232 | 264.4878688 | 264.4790528 | 264.473136 | 264.4655264 | 264.1784192 | 261.1888824 |
| 264.486232 | 264.4878688 | 264.4810528 | 264.473136 | 264.4655264 | 264.1774192 | 261.1888824 |
| 264.485232 | 264.4868688 | 264.4790528 | 264.472136 | 264.4625264 | 264.1764192 | 261.1888824 |
| 264.481232 | 264.4848688 | 264.4750528 | 264.469136 | 264.4625264 | 264.1724192 | 261.1888824 |
| 264.483232 | 264.4868688 | 264.4760528 | 264.469136 | 264.4625264 | 264.1744192 | 261.1878824 |
| 264.483232 | 264.4838688 | 264.4770528 | 264.469136 | 264.4605264 | 264.1744192 | 261.1888824 |
| 264.480232 | 264.4838688 | 264.4770528 | 264.467136 | 264.4595264 | 264.1714192 | 261.1878824 |
| 264.482232 | 264.4818688 | 264.4770528 | 264.467136 | 264.4595264 | 264.1714192 | 261.1878824 |
| 264.482232 | 264.4838688 | 264.4770528 | 264.467136 | 264.4605264 | 264.1734192 | 261.1878824 |
| 264.479232 | 264.4808688 | 264.4760528 | 264.466136 | 264.4575264 | 264.1704192 | 261.1878824 |
| 264.475232 | 264.4788688 | 264.4750528 | 264.463136 | 264.4545264 | 264.1684192 | 261.1868824 |
| 264.477232 | 264.4808688 | 264.4750528 | 264.464136 | 264.4565264 | 264.1684192 | 261.1868824 |
| 264.476232 | 264.4808688 | 264.4760528 | 264.464136 | 264.4555264 | 264.1694192 | 261.1888824 |
| 264.474232 | 264.4788688 | 264.4750528 | 264.460136 | 264.4515264 | 264.1634192 | 261.1868824 |
| 264.477232 | 264.4788688 | 264.4730528 | 264.463136 | 264.4565264 | 264.1654192 | 261.1878824 |
| 264.472232 | 264.4778688 | 264.4750528 | 264.458136 | 264.4515264 | 264.1654192 | 261.1868824 |
| 264.473232 | 264.4778688 | 264.4720528 | 264.462136 | 264.4535264 | 264.1604192 | 261.1868824 |
| 264.471232 | 264.4748688 | 264.4740528 | 264.457136 | 264.4485264 | 264.1594192 | 261.1858824 |
| 264.473232 | 264.4768688 | 264.4740528 | 264.459136 | 264.4505264 | 264.1594192 | 261.1868824 |
| 264.471232 | 264.4748688 | 264.4730528 | 264.457136 | 264.4475264 | 264.1594192 | 261.1858824 |
| 264.471232 | 264.4748688 | 264.4760528 | 264.459136 | 264.4505264 | 264.1594192 | 261.1868824 |
| 264.468232 | 264.4728688 | 264.4730528 | 264.454136 | 264.4445264 | 264.1524192 | 261.1858824 |
| 264.470232 | 264.4738688 | 264.4730528 | 264.458136 | 264.4455264 | 264.1564192 | 261.1878824 |
| 264.468232 | 264.4718688 | 264.4730528 | 264.454136 | 264.4475264 | 264.1544192 | 261.1858824 |
| 264.467232 | 264.4708688 | 264.4720528 | 264.453136 | 264.4465264 | 264.1544192 | 261.1828824 |
| 264.469232 | 264.4728688 | 264.4740528 | 264.455136 | 264.4465264 | 264.1544192 | 261.1848824 |
| 264.466232 | 264.4698688 | 264.4710528 | 264.452136 | 264.4455264 | 264.1504192 | 261.1838824 |
| 264.465232 | 264.4698688 | 264.4710528 | 264.450136 | 264.4435264 | 264.1524192 | 261.1818824 |
| 264.465232 | 264.4668688 | 264.4700528 | 264.449136 | 264.4425264 | 264.1524192 | 261.1808824 |
| 264.464232 | 264.4688688 | 264.4700528 | 264.448136 | 264.4425264 | 264.1514192 | 261.1808824 |
| 264.462232 | 264.4668688 | 264.4690528 | 264.448136 | 264.4415264 | 264.1504192 | 261.1798824 |
| 264.462232 | 264.4668688 | 264.4690528 | 264.448136 | 264.4415264 | 264.1504192 | 261.1798824 |
| 264.461232 | 264.4648688 | 264.4680528 | 264.447136 | 264.4375264 | 264.1494192 | 261.1798824 |
| 264.462232 | 264.4648688 | 264.4680528 | 264.447136 | 264.4385264 | 264.1474192 | 261.1798824 |
| 264.460232 | 264.4648688 | 264.4680528 | 264.447136 | 264.4395264 | 264.1504192 | 261.1788824 |
| 264.458232 | 264.4638688 | 264.4660528 | 264.444136 | 264.4365264 | 264.1474192 | 261.1778824 |
| 264.459232 | 264.4648688 | 264.4670528 | 264.446136 | 264.4375264 | 264.1504192 | 261.1788824 |
| 264.459232 | 264.4618688 | 264.4660528 | 264.444136 | 264.4385264 | 264.1474192 | 261.1778824 |
| 264.457232 | 264.4628688 | 264.4650528 | 264.443136 | 264.4355264 | 264.1464192 | 261.1768824 |
| 264.457232 | 264.4608688 | 264.4630528 | 264.442136 | 264.4355264 | 264.1464192 | 261.1748824 |
| 264.459232 | 264.4638688 | 264.4670528 | 264.445136 | 264.4375264 | 264.1484192 | 261.1768824 |
| 264.457232 | 264.4608688 | 264.4650528 | 264.445136 | 264.4355264 | 264.1454192 | 261.1748824 |
| 264.461232 | 264.4628688 | 264.4640528 | 264.445136 | 264.4375264 | 264.1484192 | 261.1748824 |
| 264.458232 | 264.4608688 | 264.4640528 | 264.444136 | 264.4365264 | 264.1474192 | 261.1758824 |
| 264.460232 | 264.4628688 | 264.4640528 | 264.445136 | 264.4385264 | 264.1474192 | 261.1758824 |
| 264.460232 | 264.4618688 | 264.4640528 | 264.444136 | 264.4385264 | 264.1494192 | 261.1758824 |
| 264.460232 | 264.4628688 | 264.4630528 | 264.448136 | 264.4385264 | 264.1504192 | 261.1748824 |

|            |             |             |            |             |             |             |
|------------|-------------|-------------|------------|-------------|-------------|-------------|
| 264.464232 | 264.4658688 | 264.4640528 | 264.449136 | 264.4415264 | 264.1514192 | 261.1758824 |
| 264.463232 | 264.4648688 | 264.4600528 | 264.448136 | 264.4405264 | 264.1504192 | 261.1748824 |
| 264.463232 | 264.4668688 | 264.4620528 | 264.448136 | 264.4415264 | 264.1524192 | 261.1748824 |
| 264.464232 | 264.4658688 | 264.4610528 | 264.450136 | 264.4435264 | 264.1554192 | 261.1748824 |
| 264.466232 | 264.4678688 | 264.4610528 | 264.454136 | 264.4455264 | 264.1594192 | 261.1718824 |
| 264.466232 | 264.4708688 | 264.4630528 | 264.454136 | 264.4455264 | 264.1634192 | 261.1738824 |
| 264.469232 | 264.4698688 | 264.4650528 | 264.456136 | 264.4485264 | 264.1644192 | 261.1748824 |
| 264.473232 | 264.4718688 | 264.4630528 | 264.459136 | 264.4505264 | 264.1644192 | 261.1748824 |
| 264.474232 | 264.4728688 | 264.4620528 | 264.459136 | 264.4505264 | 264.1704192 | 261.1718824 |
| 264.472232 | 264.4728688 | 264.4620528 | 264.458136 | 264.4485264 | 264.1694192 | 261.1708824 |
| 264.474232 | 264.4748688 | 264.4640528 | 264.460136 | 264.4525264 | 264.1724192 | 261.1718824 |
| 264.473232 | 264.4748688 | 264.4630528 | 264.458136 | 264.4535264 | 264.1704192 | 261.1698824 |
| 264.475232 | 264.4748688 | 264.4640528 | 264.460136 | 264.4515264 | 264.1714192 | 261.1728824 |
| 264.473232 | 264.4738688 | 264.4630528 | 264.458136 | 264.4515264 | 264.1704192 | 261.1708824 |
| 264.476232 | 264.4768688 | 264.4660528 | 264.462136 | 264.4545264 | 264.1714192 | 261.1738824 |
| 264.477232 | 264.4768688 | 264.4650528 | 264.462136 | 264.4565264 | 264.1704192 | 261.1728824 |
| 264.479232 | 264.4788688 | 264.4650528 | 264.460136 | 264.4565264 | 264.1724192 | 261.1728824 |
| 264.476232 | 264.4758688 | 264.4640528 | 264.459136 | 264.4535264 | 264.1704192 | 261.1718824 |
| 264.474232 | 264.4758688 | 264.4640528 | 264.461136 | 264.4525264 | 264.1724192 | 261.1718824 |
| 264.476232 | 264.4738688 | 264.4640528 | 264.461136 | 264.4525264 | 264.1704192 | 261.1728824 |
| 264.475232 | 264.4768688 | 264.4650528 | 264.460136 | 264.4535264 | 264.1724192 | 261.1758824 |
| 264.472232 | 264.4768688 | 264.4650528 | 264.461136 | 264.4525264 | 264.1704192 | 261.1728824 |
| 264.472232 | 264.4758688 | 264.4640528 | 264.461136 | 264.4525264 | 264.1684192 | 261.1768824 |
| 264.472232 | 264.4738688 | 264.4650528 | 264.457136 | 264.4505264 | 264.1674192 | 261.1758824 |
| 264.473232 | 264.4728688 | 264.4640528 | 264.458136 | 264.4505264 | 264.1674192 | 261.1768824 |
| 264.471232 | 264.4728688 | 264.4620528 | 264.456136 | 264.4475264 | 264.1664192 | 261.1748824 |
| 264.470232 | 264.4708688 | 264.4650528 | 264.456136 | 264.4475264 | 264.1624192 | 261.1768824 |
| 264.467232 | 264.4688688 | 264.4620528 | 264.454136 | 264.4445264 | 264.1614192 | 261.1758824 |
| 264.468232 | 264.4718688 | 264.4650528 | 264.457136 | 264.4465264 | 264.1614192 | 261.1788824 |
| 264.468232 | 264.4718688 | 264.4630528 | 264.453136 | 264.4445264 | 264.1614192 | 261.1768824 |
| 264.468232 | 264.4708688 | 264.4630528 | 264.456136 | 264.4465264 | 264.1624192 | 261.1788824 |
| 264.468232 | 264.4698688 | 264.4620528 | 264.453136 | 264.4455264 | 264.1624192 | 261.1798824 |
| 264.467232 | 264.4688688 | 264.4620528 | 264.452136 | 264.4435264 | 264.1574192 | 261.1768824 |
| 264.469232 | 264.4698688 | 264.4620528 | 264.454136 | 264.4455264 | 264.1584192 | 261.1778824 |
| 264.463232 | 264.4678688 | 264.4590528 | 264.450136 | 264.4425264 | 264.1614192 | 261.1768824 |
| 264.465232 | 264.4688688 | 264.4600528 | 264.450136 | 264.4415264 | 264.1574192 | 261.1758824 |
| 264.464232 | 264.4678688 | 264.4610528 | 264.453136 | 264.4425264 | 264.1594192 | 261.1768824 |
| 264.466232 | 264.4698688 | 264.4620528 | 264.451136 | 264.4445264 | 264.1604192 | 261.1768824 |
| 264.464232 | 264.4648688 | 264.4610528 | 264.450136 | 264.4395264 | 264.1594192 | 261.1768824 |
| 264.464232 | 264.4668688 | 264.4610528 | 264.452136 | 264.4405264 | 264.1594192 | 261.1748824 |
| 264.466232 | 264.4668688 | 264.4610528 | 264.451136 | 264.4405264 | 264.1574192 | 261.1748824 |
| 264.464232 | 264.4668688 | 264.4610528 | 264.448136 | 264.4405264 | 264.1574192 | 261.1718824 |
| 264.463232 | 264.4648688 | 264.4600528 | 264.448136 | 264.4415264 | 264.1574192 | 261.1738824 |
| 264.461232 | 264.4648688 | 264.4600528 | 264.447136 | 264.4375264 | 264.1564192 | 261.1738824 |
| 264.463232 | 264.4648688 | 264.4620528 | 264.447136 | 264.4415264 | 264.1594192 | 261.1758824 |
| 264.463232 | 264.4638688 | 264.4580528 | 264.449136 | 264.4395264 | 264.1564192 | 261.1738824 |
| 264.459232 | 264.4638688 | 264.4600528 | 264.447136 | 264.4395264 | 264.1564192 | 261.1738824 |

|            |             |             |            |             |             |             |
|------------|-------------|-------------|------------|-------------|-------------|-------------|
| 264.462232 | 264.4658688 | 264.4600528 | 264.449136 | 264.4415264 | 264.1564192 | 261.1738824 |
| 264.460232 | 264.4628688 | 264.4570528 | 264.447136 | 264.4385264 | 264.1554192 | 261.1738824 |
| 264.459232 | 264.4628688 | 264.4560528 | 264.446136 | 264.4375264 | 264.1524192 | 261.1718824 |
| 264.458232 | 264.4598688 | 264.4560528 | 264.445136 | 264.4365264 | 264.1524192 | 261.1698824 |
| 264.456232 | 264.4618688 | 264.4560528 | 264.446136 | 264.4365264 | 264.1524192 | 261.1698824 |
| 264.461232 | 264.4628688 | 264.4600528 | 264.446136 | 264.4375264 | 264.1544192 | 261.1728824 |
| 264.458232 | 264.4618688 | 264.4580528 | 264.446136 | 264.4365264 | 264.1544192 | 261.1718824 |
| 264.458232 | 264.4618688 | 264.4580528 | 264.447136 | 264.4385264 | 264.1534192 | 261.1698824 |
| 264.457232 | 264.4618688 | 264.4550528 | 264.445136 | 264.4345264 | 264.1504192 | 261.1718824 |
| 264.457232 | 264.4598688 | 264.4550528 | 264.445136 | 264.4345264 | 264.1534192 | 261.1708824 |
| 264.458232 | 264.4618688 | 264.4550528 | 264.445136 | 264.4365264 | 264.1504192 | 261.1708824 |
| 264.458232 | 264.4598688 | 264.4570528 | 264.445136 | 264.4345264 | 264.1504192 | 261.1708824 |
| 264.460232 | 264.4618688 | 264.4580528 | 264.448136 | 264.4365264 | 264.1534192 | 261.1698824 |
| 264.458232 | 264.4618688 | 264.4590528 | 264.445136 | 264.4345264 | 264.1534192 | 261.1708824 |
| 264.457232 | 264.4588688 | 264.4540528 | 264.444136 | 264.4335264 | 264.1524192 | 261.1678824 |
| 264.456232 | 264.4608688 | 264.4530528 | 264.444136 | 264.4355264 | 264.1474192 | 261.1678824 |
| 264.458232 | 264.4608688 | 264.4560528 | 264.446136 | 264.4355264 | 264.1514192 | 261.1698824 |
| 264.456232 | 264.4598688 | 264.4550528 | 264.443136 | 264.4325264 | 264.1494192 | 261.1678824 |
| 264.457232 | 264.4578688 | 264.4540528 | 264.443136 | 264.4345264 | 264.1504192 | 261.1688824 |
| 264.457232 | 264.4588688 | 264.4520528 | 264.445136 | 264.4355264 | 264.1504192 | 261.1688824 |
| 264.459232 | 264.4608688 | 264.4540528 | 264.445136 | 264.4355264 | 264.1524192 | 261.1688824 |
| 264.459232 | 264.4598688 | 264.4540528 | 264.445136 | 264.4375264 | 264.1544192 | 261.1708824 |
| 264.459232 | 264.4618688 | 264.4540528 | 264.447136 | 264.4375264 | 264.1524192 | 261.1708824 |
| 264.458232 | 264.4598688 | 264.4530528 | 264.446136 | 264.4345264 | 264.1514192 | 261.1698824 |
| 264.459232 | 264.4598688 | 264.4550528 | 264.444136 | 264.4365264 | 264.1544192 | 261.1698824 |
| 264.456232 | 264.4588688 | 264.4530528 | 264.443136 | 264.4335264 | 264.1514192 | 261.1658824 |
| 264.456232 | 264.4588688 | 264.4530528 | 264.445136 | 264.4355264 | 264.1494192 | 261.1668824 |
| 264.458232 | 264.4608688 | 264.4530528 | 264.445136 | 264.4375264 | 264.1534192 | 261.1698824 |
| 264.457232 | 264.4578688 | 264.4520528 | 264.444136 | 264.4365264 | 264.1524192 | 261.1678824 |
| 264.459232 | 264.4608688 | 264.4560528 | 264.445136 | 264.4375264 | 264.1524192 | 261.1688824 |
| 264.458232 | 264.4608688 | 264.4520528 | 264.444136 | 264.4365264 | 264.1524192 | 261.1688824 |
| 264.460232 | 264.4608688 | 264.4530528 | 264.444136 | 264.4365264 | 264.1554192 | 261.1678824 |
| 264.457232 | 264.4588688 | 264.4530528 | 264.443136 | 264.4345264 | 264.1524192 | 261.1668824 |
| 264.460232 | 264.4598688 | 264.4550528 | 264.446136 | 264.4385264 | 264.1554192 | 261.1678824 |
| 264.458232 | 264.4618688 | 264.4530528 | 264.446136 | 264.4375264 | 264.1534192 | 261.1678824 |
| 264.458232 | 264.4598688 | 264.4520528 | 264.443136 | 264.4345264 | 264.1544192 | 261.1658824 |
| 264.456232 | 264.4598688 | 264.4520528 | 264.445136 | 264.4365264 | 264.1524192 | 261.1668824 |
| 264.458232 | 264.4608688 | 264.4520528 | 264.447136 | 264.4345264 | 264.1544192 | 261.1668824 |
| 264.458232 | 264.4588688 | 264.4530528 | 264.445136 | 264.4345264 | 264.1554192 | 261.1688824 |
| 264.459232 | 264.4608688 | 264.4530528 | 264.445136 | 264.4375264 | 264.1554192 | 261.1688824 |
| 264.459232 | 264.4608688 | 264.4530528 | 264.444136 | 264.4355264 | 264.1544192 | 261.1678824 |
| 264.459232 | 264.4608688 | 264.4530528 | 264.444136 | 264.4355264 | 264.1544192 | 261.1678824 |
| 264.456232 | 264.4598688 | 264.4520528 | 264.443136 | 264.4345264 | 264.1554192 | 261.1648824 |
| 264.459232 | 264.4608688 | 264.4540528 | 264.446136 | 264.4355264 | 264.1544192 | 261.1678824 |
| 264.457232 | 264.4598688 | 264.4510528 | 264.443136 | 264.4335264 | 264.1534192 | 261.1668824 |
| 264.458232 | 264.4598688 | 264.4530528 | 264.445136 | 264.4365264 | 264.1534192 | 261.1688824 |
| 264.457232 | 264.4588688 | 264.4530528 | 264.442136 | 264.4355264 | 264.1544192 | 261.1668824 |

|            |             |             |            |             |             |             |
|------------|-------------|-------------|------------|-------------|-------------|-------------|
| 264.458232 | 264.4598688 | 264.4540528 | 264.444136 | 264.4335264 | 264.1524192 | 261.1678824 |
| 264.456232 | 264.4588688 | 264.4520528 | 264.442136 | 264.4325264 | 264.1494192 | 261.1678824 |
| 264.456232 | 264.4588688 | 264.4520528 | 264.442136 | 264.4355264 | 264.1514192 | 261.1678824 |
| 264.451232 | 264.4558688 | 264.4530528 | 264.439136 | 264.4295264 | 264.1484192 | 261.1668824 |
| 264.453232 | 264.4568688 | 264.4520528 | 264.439136 | 264.4305264 | 264.1494192 | 261.1678824 |
| 264.451232 | 264.4578688 | 264.4510528 | 264.436136 | 264.4295264 | 264.1484192 | 261.1678824 |
| 264.454232 | 264.4558688 | 264.4500528 | 264.438136 | 264.4315264 | 264.1474192 | 261.1648824 |
| 264.450232 | 264.4548688 | 264.4520528 | 264.438136 | 264.4315264 | 264.1474192 | 261.1668824 |
| 264.452232 | 264.4548688 | 264.4500528 | 264.437136 | 264.4315264 | 264.1454192 | 261.1648824 |
| 264.451232 | 264.4568688 | 264.4520528 | 264.437136 | 264.4305264 | 264.1474192 | 261.1668824 |
| 264.451232 | 264.4548688 | 264.4510528 | 264.437136 | 264.4275264 | 264.1464192 | 261.1688824 |
| 264.451232 | 264.4548688 | 264.4530528 | 264.435136 | 264.4275264 | 264.1464192 | 261.1688824 |
| 264.448232 | 264.4538688 | 264.4530528 | 264.436136 | 264.4275264 | 264.1454192 | 261.1658824 |
| 264.447232 | 264.4558688 | 264.4530528 | 264.436136 | 264.4245264 | 264.1434192 | 261.1698824 |
| 264.446232 | 264.4508688 | 264.4510528 | 264.435136 | 264.4255264 | 264.1424192 | 261.1668824 |
| 264.444232 | 264.4508688 | 264.4490528 | 264.432136 | 264.4225264 | 264.1394192 | 261.1648824 |
| 264.446232 | 264.4508688 | 264.4490528 | 264.433136 | 264.4225264 | 264.1414192 | 261.1688824 |
| 264.444232 | 264.4508688 | 264.4490528 | 264.432136 | 264.4225264 | 264.1394192 | 261.1668824 |
| 264.446232 | 264.4528688 | 264.4510528 | 264.432136 | 264.4225264 | 264.1374192 | 261.1668824 |
| 264.445232 | 264.4488688 | 264.4480528 | 264.432136 | 264.4205264 | 264.1384192 | 261.1668824 |
| 264.443232 | 264.4488688 | 264.4500528 | 264.429136 | 264.4175264 | 264.1364192 | 261.1668824 |
| 264.443232 | 264.4498688 | 264.4500528 | 264.431136 | 264.4215264 | 264.1404192 | 261.1668824 |
| 264.441232 | 264.4468688 | 264.4490528 | 264.428136 | 264.4185264 | 264.1324192 | 261.1658824 |
| 264.442232 | 264.4488688 | 264.4520528 | 264.428136 | 264.4195264 | 264.1334192 | 261.1658824 |
| 264.441232 | 264.4458688 | 264.4520528 | 264.428136 | 264.4205264 | 264.1344192 | 261.1668824 |
| 264.440232 | 264.4458688 | 264.4500528 | 264.423136 | 264.4155264 | 264.1314192 | 261.1648824 |
| 264.440232 | 264.4448688 | 264.4480528 | 264.425136 | 264.4175264 | 264.1324192 | 261.1648824 |
| 264.435232 | 264.4418688 | 264.4470528 | 264.422136 | 264.4125264 | 264.1314192 | 261.1618824 |
| 264.436232 | 264.4428688 | 264.4480528 | 264.424136 | 264.4145264 | 264.1354192 | 261.1638824 |
| 264.437232 | 264.4438688 | 264.4470528 | 264.422136 | 264.4125264 | 264.1284192 | 261.1638824 |
| 264.434232 | 264.4408688 | 264.4450528 | 264.421136 | 264.4115264 | 264.1294192 | 261.1628824 |
| 264.434232 | 264.4408688 | 264.4460528 | 264.421136 | 264.4115264 | 264.1274192 | 261.1608824 |
| 264.433232 | 264.4398688 | 264.4450528 | 264.420136 | 264.4105264 | 264.1284192 | 261.1618824 |
| 264.430232 | 264.4398688 | 264.4450528 | 264.420136 | 264.4115264 | 264.1254192 | 261.1618824 |
| 264.432232 | 264.4378688 | 264.4460528 | 264.419136 | 264.4095264 | 264.1274192 | 261.1618824 |
| 264.431232 | 264.4388688 | 264.4440528 | 264.416136 | 264.4085264 | 264.1244192 | 261.1608824 |
| 264.431232 | 264.4388688 | 264.4440528 | 264.416136 | 264.4085264 | 264.1264192 | 261.1608824 |
| 264.428232 | 264.4368688 | 264.4430528 | 264.415136 | 264.4075264 | 264.1254192 | 261.1598824 |
| 264.432232 | 264.4388688 | 264.4430528 | 264.416136 | 264.4075264 | 264.1264192 | 261.1598824 |
| 264.427232 | 264.4378688 | 264.4400528 | 264.417136 | 264.4075264 | 264.1264192 | 261.1598824 |
| 264.428232 | 264.4368688 | 264.4430528 | 264.414136 | 264.4065264 | 264.1254192 | 261.1588824 |
| 264.426232 | 264.4348688 | 264.4430528 | 264.414136 | 264.4055264 | 264.1234192 | 261.1588824 |
| 264.425232 | 264.4338688 | 264.4400528 | 264.414136 | 264.4045264 | 264.1244192 | 261.1578824 |
| 264.427232 | 264.4338688 | 264.4420528 | 264.414136 | 264.4045264 | 264.1244192 | 261.1578824 |
| 264.428232 | 264.4348688 | 264.4420528 | 264.414136 | 264.4045264 | 264.1244192 | 261.1598824 |
| 264.425232 | 264.4338688 | 264.4380528 | 264.411136 | 264.4035264 | 264.1234192 | 261.1548824 |
| 264.426232 | 264.4328688 | 264.4390528 | 264.412136 | 264.4035264 | 264.1234192 | 261.1548824 |

|            |             |             |            |             |             |             |
|------------|-------------|-------------|------------|-------------|-------------|-------------|
| 264.426232 | 264.4328688 | 264.4390528 | 264.413136 | 264.4035264 | 264.1254192 | 261.1568824 |
| 264.429232 | 264.4338688 | 264.4420528 | 264.413136 | 264.4035264 | 264.1254192 | 261.1548824 |
| 264.426232 | 264.4318688 | 264.4370528 | 264.412136 | 264.4015264 | 264.1254192 | 261.1538824 |
| 264.426232 | 264.4318688 | 264.4410528 | 264.412136 | 264.4025264 | 264.1254192 | 261.1538824 |
| 264.427232 | 264.4348688 | 264.4390528 | 264.413136 | 264.4035264 | 264.1254192 | 261.1548824 |
| 264.426232 | 264.4308688 | 264.4370528 | 264.413136 | 264.4025264 | 264.1264192 | 261.1538824 |
| 264.428232 | 264.4318688 | 264.4380528 | 264.413136 | 264.4035264 | 264.1244192 | 261.1538824 |
| 264.428232 | 264.4318688 | 264.4350528 | 264.413136 | 264.4045264 | 264.1244192 | 261.1548824 |
| 264.426232 | 264.4308688 | 264.4350528 | 264.411136 | 264.4015264 | 264.1244192 | 261.1498824 |
| 264.429232 | 264.4328688 | 264.4360528 | 264.416136 | 264.4045264 | 264.1274192 | 261.1538824 |
| 264.430232 | 264.4328688 | 264.4370528 | 264.416136 | 264.4055264 | 264.1314192 | 261.1508824 |
| 264.430232 | 264.4328688 | 264.4370528 | 264.416136 | 264.4075264 | 264.1324192 | 261.1518824 |
| 264.427232 | 264.4338688 | 264.4340528 | 264.415136 | 264.4045264 | 264.1314192 | 261.1498824 |
| 264.429232 | 264.4348688 | 264.4350528 | 264.418136 | 264.4085264 | 264.1314192 | 261.1518824 |
| 264.433232 | 264.4378688 | 264.4360528 | 264.421136 | 264.4115264 | 264.1364192 | 261.1538824 |
| 264.432232 | 264.4368688 | 264.4370528 | 264.422136 | 264.4105264 | 264.1354192 | 261.1508824 |
| 264.437232 | 264.4398688 | 264.4380528 | 264.423136 | 264.4115264 | 264.1364192 | 261.1518824 |
| 264.437232 | 264.4388688 | 264.4350528 | 264.423136 | 264.4135264 | 264.1394192 | 261.1508824 |
| 264.440232 | 264.4418688 | 264.4360528 | 264.425136 | 264.4155264 | 264.1404192 | 261.1508824 |
| 264.441232 | 264.4428688 | 264.4370528 | 264.428136 | 264.4155264 | 264.1424192 | 261.1488824 |
| 264.442232 | 264.4428688 | 264.4370528 | 264.428136 | 264.4205264 | 264.1444192 | 261.1508824 |
| 264.444232 | 264.4448688 | 264.4380528 | 264.432136 | 264.4225264 | 264.1464192 | 261.1508824 |
| 264.445232 | 264.4468688 | 264.4360528 | 264.430136 | 264.4215264 | 264.1474192 | 261.1458824 |
| 264.447232 | 264.4488688 | 264.4360528 | 264.434136 | 264.4225264 | 264.1484192 | 261.1498824 |
| 264.449232 | 264.4498688 | 264.4380528 | 264.434136 | 264.4245264 | 264.1484192 | 261.1508824 |
| 264.449232 | 264.4498688 | 264.4360528 | 264.434136 | 264.4245264 | 264.1514192 | 261.1468824 |
| 264.449232 | 264.4498688 | 264.4380528 | 264.437136 | 264.4265264 | 264.1544192 | 261.1498824 |
| 264.449232 | 264.4498688 | 264.4380528 | 264.436136 | 264.4245264 | 264.1534192 | 261.1478824 |
| 264.450232 | 264.4508688 | 264.4390528 | 264.436136 | 264.4255264 | 264.1534192 | 261.1448824 |
| 264.452232 | 264.4518688 | 264.4390528 | 264.439136 | 264.4285264 | 264.1554192 | 261.1488824 |
| 264.453232 | 264.4538688 | 264.4400528 | 264.441136 | 264.4305264 | 264.1554192 | 261.1498824 |
| 264.453232 | 264.4548688 | 264.4410528 | 264.443136 | 264.4325264 | 264.1554192 | 261.1468824 |
| 264.453232 | 264.4548688 | 264.4390528 | 264.441136 | 264.4305264 | 264.1574192 | 261.1498824 |
| 264.456232 | 264.4558688 | 264.4380528 | 264.443136 | 264.4305264 | 264.1564192 | 261.1488824 |
| 264.457232 | 264.4548688 | 264.4410528 | 264.443136 | 264.4325264 | 264.1594192 | 261.1498824 |
| 264.455232 | 264.4568688 | 264.4410528 | 264.444136 | 264.4325264 | 264.1614192 | 261.1498824 |
| 264.456232 | 264.4578688 | 264.4420528 | 264.442136 | 264.4315264 | 264.1624192 | 261.1518824 |
| 264.456232 | 264.4578688 | 264.4410528 | 264.443136 | 264.4335264 | 264.1604192 | 261.1508824 |
| 264.455232 | 264.4588688 | 264.4410528 | 264.443136 | 264.4345264 | 264.1614192 | 261.1538824 |
| 264.455232 | 264.4578688 | 264.4390528 | 264.443136 | 264.4345264 | 264.1594192 | 261.1528824 |
| 264.455232 | 264.4558688 | 264.4410528 | 264.443136 | 264.4325264 | 264.1564192 | 261.1528824 |
| 264.454232 | 264.4558688 | 264.4400528 | 264.442136 | 264.4315264 | 264.1544192 | 261.1548824 |
| 264.454232 | 264.4558688 | 264.4400528 | 264.440136 | 264.4315264 | 264.1544192 | 261.1548824 |
| 264.457232 | 264.4588688 | 264.4420528 | 264.443136 | 264.4345264 | 264.1554192 | 261.1588824 |
| 264.454232 | 264.4558688 | 264.4430528 | 264.442136 | 264.4315264 | 264.1524192 | 261.1558824 |
| 264.455232 | 264.4558688 | 264.4420528 | 264.441136 | 264.4345264 | 264.1554192 | 261.1588824 |
| 264.455232 | 264.4558688 | 264.4420528 | 264.441136 | 264.4325264 | 264.1554192 | 261.1568824 |

|            |             |             |            |             |             |             |
|------------|-------------|-------------|------------|-------------|-------------|-------------|
| 264.453232 | 264.4558688 | 264.4420528 | 264.441136 | 264.4305264 | 264.1554192 | 261.1568824 |
| 264.453232 | 264.4578688 | 264.4420528 | 264.441136 | 264.4325264 | 264.1534192 | 261.1618824 |
| 264.453232 | 264.4558688 | 264.4440528 | 264.440136 | 264.4325264 | 264.1554192 | 261.1618824 |
| 264.453232 | 264.4578688 | 264.4440528 | 264.441136 | 264.4325264 | 264.1554192 | 261.1638824 |
| 264.451232 | 264.4558688 | 264.4420528 | 264.440136 | 264.4305264 | 264.1504192 | 261.1618824 |
| 264.455232 | 264.4578688 | 264.4440528 | 264.441136 | 264.4325264 | 264.1514192 | 261.1638824 |
| 264.453232 | 264.4548688 | 264.4420528 | 264.438136 | 264.4295264 | 264.1504192 | 261.1638824 |
| 264.451232 | 264.4548688 | 264.4440528 | 264.440136 | 264.4305264 | 264.1534192 | 261.1618824 |
| 264.451232 | 264.4558688 | 264.4440528 | 264.437136 | 264.4295264 | 264.1534192 | 261.1638824 |
| 264.449232 | 264.4518688 | 264.4410528 | 264.435136 | 264.4275264 | 264.1494192 | 261.1608824 |
| 264.452232 | 264.4548688 | 264.4430528 | 264.438136 | 264.4275264 | 264.1524192 | 261.1638824 |
| 264.450232 | 264.4548688 | 264.4430528 | 264.438136 | 264.4295264 | 264.1484192 | 261.1638824 |
| 264.451232 | 264.4548688 | 264.4420528 | 264.438136 | 264.4295264 | 264.1504192 | 261.1638824 |
| 264.450232 | 264.4528688 | 264.4410528 | 264.437136 | 264.4275264 | 264.1484192 | 261.1638824 |
| 264.448232 | 264.4518688 | 264.4410528 | 264.437136 | 264.4255264 | 264.1504192 | 261.1638824 |
| 264.450232 | 264.4528688 | 264.4440528 | 264.437136 | 264.4295264 | 264.1524192 | 261.1648824 |
| 264.450232 | 264.4528688 | 264.4430528 | 264.435136 | 264.4275264 | 264.1484192 | 261.1628824 |
| 264.448232 | 264.4528688 | 264.4430528 | 264.437136 | 264.4275264 | 264.1504192 | 261.1638824 |
| 264.449232 | 264.4498688 | 264.4430528 | 264.437136 | 264.4265264 | 264.1474192 | 261.1608824 |
| 264.447232 | 264.4498688 | 264.4420528 | 264.436136 | 264.4245264 | 264.1464192 | 261.1628824 |
| 264.447232 | 264.4488688 | 264.4400528 | 264.434136 | 264.4245264 | 264.1474192 | 261.1628824 |
| 264.447232 | 264.4498688 | 264.4400528 | 264.436136 | 264.4265264 | 264.1494192 | 261.1628824 |
| 264.446232 | 264.4488688 | 264.4400528 | 264.434136 | 264.4235264 | 264.1484192 | 261.1618824 |
| 264.448232 | 264.4508688 | 264.4400528 | 264.434136 | 264.4235264 | 264.1484192 | 261.1618824 |
| 264.448232 | 264.4508688 | 264.4420528 | 264.436136 | 264.4255264 | 264.1514192 | 261.1628824 |
| 264.446232 | 264.4488688 | 264.4410528 | 264.431136 | 264.4255264 | 264.1484192 | 261.1618824 |
| 264.445232 | 264.4488688 | 264.4390528 | 264.433136 | 264.4245264 | 264.1474192 | 261.1588824 |
| 264.446232 | 264.4508688 | 264.4410528 | 264.431136 | 264.4235264 | 264.1464192 | 261.1618824 |
| 264.443232 | 264.4508688 | 264.4390528 | 264.432136 | 264.4225264 | 264.1454192 | 261.1588824 |
| 264.448232 | 264.4488688 | 264.4420528 | 264.433136 | 264.4235264 | 264.1464192 | 261.1618824 |
| 264.447232 | 264.4488688 | 264.4390528 | 264.432136 | 264.4225264 | 264.1454192 | 261.1588824 |
| 264.446232 | 264.4508688 | 264.4420528 | 264.431136 | 264.4255264 | 264.1484192 | 261.1628824 |
| 264.442232 | 264.4458688 | 264.4380528 | 264.430136 | 264.4195264 | 264.1444192 | 261.1608824 |
| 264.443232 | 264.4478688 | 264.4390528 | 264.430136 | 264.4205264 | 264.1454192 | 261.1588824 |
| 264.443232 | 264.4478688 | 264.4390528 | 264.430136 | 264.4225264 | 264.1454192 | 261.1598824 |
| 264.444232 | 264.4478688 | 264.4390528 | 264.431136 | 264.4225264 | 264.1454192 | 261.1618824 |
| 264.444232 | 264.4478688 | 264.4390528 | 264.431136 | 264.4225264 | 264.1464192 | 261.1588824 |
| 264.446232 | 264.4508688 | 264.4400528 | 264.433136 | 264.4235264 | 264.1484192 | 261.1618824 |
| 264.443232 | 264.4478688 | 264.4390528 | 264.431136 | 264.4225264 | 264.1484192 | 261.1588824 |
| 264.444232 | 264.4478688 | 264.4410528 | 264.431136 | 264.4235264 | 264.1484192 | 261.1618824 |
| 264.443232 | 264.4448688 | 264.4380528 | 264.428136 | 264.4245264 | 264.1434192 | 261.1588824 |
| 264.443232 | 264.4458688 | 264.4390528 | 264.430136 | 264.4225264 | 264.1474192 | 261.1618824 |
| 264.443232 | 264.4458688 | 264.4380528 | 264.430136 | 264.4225264 | 264.1474192 | 261.1598824 |
| 264.444232 | 264.4458688 | 264.4390528 | 264.431136 | 264.4225264 | 264.1464192 | 261.1618824 |
| 264.441232 | 264.4448688 | 264.4380528 | 264.432136 | 264.4205264 | 264.1434192 | 261.1598824 |
| 264.442232 | 264.4458688 | 264.4400528 | 264.428136 | 264.4205264 | 264.1444192 | 261.1588824 |
| 264.440232 | 264.4438688 | 264.4410528 | 264.430136 | 264.4195264 | 264.1454192 | 261.1598824 |



|            |             |             |            |             |             |             |
|------------|-------------|-------------|------------|-------------|-------------|-------------|
| 264.440232 | 264.4448688 | 264.4390528 | 264.428136 | 264.4195264 | 264.1434192 | 261.1588824 |
| 264.440232 | 264.4428688 | 264.4390528 | 264.427136 | 264.4195264 | 264.1454192 | 261.1588824 |
| 264.438232 | 264.4428688 | 264.4380528 | 264.427136 | 264.4175264 | 264.1444192 | 261.1608824 |
| 264.440232 | 264.4448688 | 264.4380528 | 264.427136 | 264.4175264 | 264.1444192 | 261.1588824 |
| 264.440232 | 264.4438688 | 264.4390528 | 264.428136 | 264.4175264 | 264.1434192 | 261.1598824 |
| 264.438232 | 264.4428688 | 264.4360528 | 264.427136 | 264.4175264 | 264.1434192 | 261.1598824 |
| 264.438232 | 264.4428688 | 264.4380528 | 264.425136 | 264.4175264 | 264.1454192 | 261.1588824 |
| 264.438232 | 264.4428688 | 264.4380528 | 264.425136 | 264.4155264 | 264.1404192 | 261.1598824 |
| 264.435232 | 264.4378688 | 264.4350528 | 264.421136 | 264.4115264 | 264.1374192 | 261.1558824 |
| 264.435232 | 264.4408688 | 264.4350528 | 264.425136 | 264.4155264 | 264.1374192 | 261.1598824 |
| 264.435232 | 264.4388688 | 264.4370528 | 264.423136 | 264.4115264 | 264.1414192 | 261.1598824 |
| 264.433232 | 264.4368688 | 264.4350528 | 264.422136 | 264.4125264 | 264.1374192 | 261.1558824 |
| 264.431232 | 264.4378688 | 264.4360528 | 264.420136 | 264.4105264 | 264.1364192 | 261.1568824 |
| 264.434232 | 264.4378688 | 264.4360528 | 264.422136 | 264.4125264 | 264.1364192 | 261.1588824 |
| 264.432232 | 264.4348688 | 264.4320528 | 264.418136 | 264.4085264 | 264.1344192 | 261.1558824 |
| 264.430232 | 264.4348688 | 264.4330528 | 264.418136 | 264.4085264 | 264.1364192 | 261.1558824 |
| 264.430232 | 264.4338688 | 264.4360528 | 264.418136 | 264.4085264 | 264.1344192 | 261.1558824 |
| 264.428232 | 264.4338688 | 264.4340528 | 264.415136 | 264.4075264 | 264.1334192 | 261.1548824 |
| 264.426232 | 264.4308688 | 264.4330528 | 264.414136 | 264.4025264 | 264.1344192 | 261.1548824 |
| 264.426232 | 264.4328688 | 264.4330528 | 264.412136 | 264.4035264 | 264.1334192 | 261.1548824 |
| 264.425232 | 264.4308688 | 264.4310528 | 264.415136 | 264.4055264 | 264.1314192 | 261.1548824 |
| 264.425232 | 264.4308688 | 264.4340528 | 264.415136 | 264.4035264 | 264.1294192 | 261.1558824 |
| 264.425232 | 264.4308688 | 264.4350528 | 264.411136 | 264.4025264 | 264.1304192 | 261.1558824 |
| 264.426232 | 264.4318688 | 264.4330528 | 264.413136 | 264.4015264 | 264.1284192 | 261.1558824 |
| 264.423232 | 264.4288688 | 264.4320528 | 264.411136 | 264.3995264 | 264.1294192 | 261.1528824 |
| 264.425232 | 264.4288688 | 264.4350528 | 264.411136 | 264.4015264 | 264.1274192 | 261.1558824 |
| 264.425232 | 264.4288688 | 264.4330528 | 264.413136 | 264.3995264 | 264.1274192 | 261.1558824 |
| 264.425232 | 264.4288688 | 264.4330528 | 264.409136 | 264.4015264 | 264.1274192 | 261.1558824 |
| 264.423232 | 264.4278688 | 264.4320528 | 264.409136 | 264.4015264 | 264.1254192 | 261.1528824 |
| 264.423232 | 264.4278688 | 264.4320528 | 264.408136 | 264.3975264 | 264.1234192 | 261.1548824 |
| 264.422232 | 264.4268688 | 264.4310528 | 264.407136 | 264.3995264 | 264.1224192 | 261.1528824 |
| 264.421232 | 264.4278688 | 264.4320528 | 264.406136 | 264.3985264 | 264.1234192 | 261.1528824 |
| 264.419232 | 264.4238688 | 264.4300528 | 264.406136 | 264.3975264 | 264.1214192 | 261.1508824 |
| 264.420232 | 264.4238688 | 264.4310528 | 264.407136 | 264.3975264 | 264.1214192 | 261.1528824 |
| 264.419232 | 264.4238688 | 264.4290528 | 264.404136 | 264.3955264 | 264.1194192 | 261.1488824 |
| 264.419232 | 264.4258688 | 264.4290528 | 264.408136 | 264.3975264 | 264.1224192 | 261.1508824 |
| 264.419232 | 264.4238688 | 264.4290528 | 264.406136 | 264.3955264 | 264.1214192 | 261.1498824 |
| 264.420232 | 264.4258688 | 264.4290528 | 264.406136 | 264.3955264 | 264.1194192 | 261.1498824 |
| 264.420232 | 264.4238688 | 264.4310528 | 264.405136 | 264.3955264 | 264.1204192 | 261.1508824 |
| 264.416232 | 264.4238688 | 264.4290528 | 264.404136 | 264.3955264 | 264.1204192 | 261.1488824 |
| 264.414232 | 264.4198688 | 264.4270528 | 264.401136 | 264.3925264 | 264.1204192 | 261.1468824 |
| 264.414232 | 264.4218688 | 264.4270528 | 264.401136 | 264.3925264 | 264.1184192 | 261.1468824 |
| 264.414232 | 264.4198688 | 264.4250528 | 264.400136 | 264.3925264 | 264.1184192 | 261.1468824 |
| 264.415232 | 264.4208688 | 264.4280528 | 264.403136 | 264.3945264 | 264.1194192 | 261.1468824 |
| 264.417232 | 264.4238688 | 264.4290528 | 264.402136 | 264.3935264 | 264.1174192 | 261.1498824 |
| 264.414232 | 264.4228688 | 264.4280528 | 264.399136 | 264.3905264 | 264.1164192 | 261.1468824 |
| 264.415232 | 264.4208688 | 264.4280528 | 264.401136 | 264.3935264 | 264.1194192 | 261.1498824 |

|            |             |             |            |             |             |             |
|------------|-------------|-------------|------------|-------------|-------------|-------------|
| 264.413232 | 264.4208688 | 264.4280528 | 264.399136 | 264.3935264 | 264.1154192 | 261.1458824 |
| 264.414232 | 264.4198688 | 264.4260528 | 264.399136 | 264.3925264 | 264.1174192 | 261.1468824 |
| 264.412232 | 264.4178688 | 264.4260528 | 264.399136 | 264.3905264 | 264.1164192 | 261.1448824 |
| 264.413232 | 264.4198688 | 264.4260528 | 264.401136 | 264.3905264 | 264.1154192 | 261.1458824 |
| 264.413232 | 264.4208688 | 264.4270528 | 264.401136 | 264.3905264 | 264.1174192 | 261.1478824 |
| 264.413232 | 264.4188688 | 264.4270528 | 264.399136 | 264.3915264 | 264.1174192 | 261.1458824 |
| 264.415232 | 264.4188688 | 264.4260528 | 264.401136 | 264.3915264 | 264.1174192 | 261.1438824 |
| 264.415232 | 264.4188688 | 264.4260528 | 264.401136 | 264.3915264 | 264.1174192 | 261.1478824 |
| 264.413232 | 264.4188688 | 264.4270528 | 264.401136 | 264.3915264 | 264.1174192 | 261.1478824 |
| 264.411232 | 264.4198688 | 264.4240528 | 264.398136 | 264.3885264 | 264.1154192 | 261.1448824 |
| 264.413232 | 264.4198688 | 264.4260528 | 264.399136 | 264.3885264 | 264.1154192 | 261.1448824 |
| 264.412232 | 264.4208688 | 264.4250528 | 264.400136 | 264.3915264 | 264.1164192 | 261.1438824 |
| 264.414232 | 264.4188688 | 264.4270528 | 264.402136 | 264.3915264 | 264.1164192 | 261.1438824 |
| 264.413232 | 264.4188688 | 264.4260528 | 264.399136 | 264.3915264 | 264.1174192 | 261.1408824 |
| 264.415232 | 264.4178688 | 264.4220528 | 264.399136 | 264.3885264 | 264.1204192 | 261.1428824 |
| 264.413232 | 264.4188688 | 264.4240528 | 264.401136 | 264.3915264 | 264.1174192 | 261.1408824 |
| 264.413232 | 264.4198688 | 264.4240528 | 264.398136 | 264.3905264 | 264.1174192 | 261.1408824 |
| 264.418232 | 264.4218688 | 264.4270528 | 264.404136 | 264.3945264 | 264.1214192 | 261.1438824 |
| 264.418232 | 264.4208688 | 264.4240528 | 264.404136 | 264.3955264 | 264.1204192 | 261.1408824 |
| 264.418232 | 264.4228688 | 264.4240528 | 264.404136 | 264.3955264 | 264.1224192 | 261.1408824 |
| 264.419232 | 264.4218688 | 264.4230528 | 264.405136 | 264.3965264 | 264.1234192 | 261.1388824 |
| 264.419232 | 264.4238688 | 264.4230528 | 264.405136 | 264.3985264 | 264.1274192 | 261.1388824 |
| 264.425232 | 264.4248688 | 264.4250528 | 264.410136 | 264.4015264 | 264.1284192 | 261.1408824 |
| 264.425232 | 264.4238688 | 264.4210528 | 264.410136 | 264.4015264 | 264.1304192 | 261.1408824 |
| 264.426232 | 264.4278688 | 264.4230528 | 264.411136 | 264.4045264 | 264.1334192 | 261.1398824 |
| 264.430232 | 264.4308688 | 264.4240528 | 264.416136 | 264.4075264 | 264.1404192 | 261.1418824 |
| 264.432232 | 264.4318688 | 264.4250528 | 264.417136 | 264.4085264 | 264.1374192 | 261.1408824 |
| 264.434232 | 264.4348688 | 264.4260528 | 264.423136 | 264.4115264 | 264.1404192 | 261.1408824 |
| 264.436232 | 264.4368688 | 264.4280528 | 264.421136 | 264.4125264 | 264.1424192 | 261.1408824 |
| 264.437232 | 264.4378688 | 264.4270528 | 264.424136 | 264.4175264 | 264.1434192 | 261.1398824 |
| 264.437232 | 264.4378688 | 264.4250528 | 264.424136 | 264.4155264 | 264.1414192 | 261.1368824 |
| 264.440232 | 264.4388688 | 264.4270528 | 264.427136 | 264.4155264 | 264.1484192 | 261.1388824 |
| 264.440232 | 264.4408688 | 264.4260528 | 264.429136 | 264.4185264 | 264.1484192 | 261.1368824 |
| 264.443232 | 264.4438688 | 264.4280528 | 264.428136 | 264.4195264 | 264.1494192 | 261.1378824 |
| 264.445232 | 264.4458688 | 264.4280528 | 264.433136 | 264.4245264 | 264.1534192 | 261.1378824 |
| 264.445232 | 264.4458688 | 264.4300528 | 264.432136 | 264.4255264 | 264.1514192 | 261.1388824 |
| 264.448232 | 264.4488688 | 264.4310528 | 264.435136 | 264.4245264 | 264.1554192 | 261.1378824 |
| 264.448232 | 264.4488688 | 264.4300528 | 264.436136 | 264.4255264 | 264.1544192 | 261.1378824 |
| 264.451232 | 264.4508688 | 264.4330528 | 264.439136 | 264.4285264 | 264.1574192 | 261.1418824 |
| 264.448232 | 264.4478688 | 264.4290528 | 264.434136 | 264.4255264 | 264.1574192 | 261.1368824 |
| 264.451232 | 264.4538688 | 264.4330528 | 264.440136 | 264.4305264 | 264.1554192 | 261.1408824 |
| 264.450232 | 264.4518688 | 264.4310528 | 264.438136 | 264.4285264 | 264.1554192 | 261.1398824 |
| 264.451232 | 264.4518688 | 264.4330528 | 264.438136 | 264.4265264 | 264.1554192 | 261.1408824 |
| 264.453232 | 264.4498688 | 264.4330528 | 264.439136 | 264.4285264 | 264.1534192 | 261.1408824 |
| 264.452232 | 264.4548688 | 264.4350528 | 264.440136 | 264.4315264 | 264.1594192 | 261.1438824 |
| 264.452232 | 264.4508688 | 264.4350528 | 264.440136 | 264.4295264 | 264.1574192 | 261.1448824 |
| 264.453232 | 264.4538688 | 264.4340528 | 264.442136 | 264.4305264 | 264.1554192 | 261.1468824 |

|            |             |             |            |             |             |             |
|------------|-------------|-------------|------------|-------------|-------------|-------------|
| 264.454232 | 264.4538688 | 264.4380528 | 264.442136 | 264.4325264 | 264.1594192 | 261.1498824 |
| 264.453232 | 264.4528688 | 264.4380528 | 264.442136 | 264.4305264 | 264.1554192 | 261.1478824 |
| 264.453232 | 264.4538688 | 264.4380528 | 264.442136 | 264.4335264 | 264.1574192 | 261.1508824 |
| 264.451232 | 264.4518688 | 264.4370528 | 264.439136 | 264.4315264 | 264.1554192 | 261.1508824 |
| 264.452232 | 264.4528688 | 264.4380528 | 264.440136 | 264.4305264 | 264.1584192 | 261.1488824 |
| 264.452232 | 264.4548688 | 264.4370528 | 264.440136 | 264.4325264 | 264.1564192 | 261.1528824 |
| 264.455232 | 264.4538688 | 264.4400528 | 264.441136 | 264.4335264 | 264.1574192 | 261.1538824 |
| 264.454232 | 264.4558688 | 264.4380528 | 264.439136 | 264.4345264 | 264.1594192 | 261.1558824 |
| 264.452232 | 264.4548688 | 264.4390528 | 264.442136 | 264.4315264 | 264.1544192 | 261.1558824 |
| 264.453232 | 264.4528688 | 264.4390528 | 264.438136 | 264.4305264 | 264.1574192 | 261.1548824 |
| 264.452232 | 264.4528688 | 264.4370528 | 264.438136 | 264.4285264 | 264.1524192 | 261.1558824 |
| 264.452232 | 264.4538688 | 264.4410528 | 264.439136 | 264.4325264 | 264.1544192 | 261.1588824 |
| 264.452232 | 264.4518688 | 264.4390528 | 264.441136 | 264.4295264 | 264.1514192 | 261.1588824 |
| 264.453232 | 264.4538688 | 264.4420528 | 264.440136 | 264.4315264 | 264.1534192 | 261.1628824 |
| 264.451232 | 264.4508688 | 264.4390528 | 264.437136 | 264.4305264 | 264.1524192 | 261.1578824 |
| 264.450232 | 264.4538688 | 264.4390528 | 264.439136 | 264.4305264 | 264.1484192 | 261.1598824 |
| 264.450232 | 264.4488688 | 264.4370528 | 264.436136 | 264.4275264 | 264.1494192 | 261.1588824 |
| 264.447232 | 264.4488688 | 264.4360528 | 264.434136 | 264.4255264 | 264.1494192 | 261.1588824 |
| 264.447232 | 264.4508688 | 264.4380528 | 264.436136 | 264.4255264 | 264.1474192 | 261.1598824 |
| 264.449232 | 264.4508688 | 264.4380528 | 264.436136 | 264.4275264 | 264.1474192 | 261.1598824 |
| 264.447232 | 264.4508688 | 264.4380528 | 264.436136 | 264.4255264 | 264.1494192 | 261.1598824 |
| 264.447232 | 264.4508688 | 264.4380528 | 264.436136 | 264.4255264 | 264.1484192 | 261.1618824 |
| 264.445232 | 264.4488688 | 264.4380528 | 264.434136 | 264.4275264 | 264.1494192 | 261.1598824 |
| 264.446232 | 264.4478688 | 264.4390528 | 264.436136 | 264.4275264 | 264.1474192 | 261.1598824 |
| 264.445232 | 264.4488688 | 264.4380528 | 264.434136 | 264.4245264 | 264.1464192 | 261.1608824 |
| 264.444232 | 264.4488688 | 264.4390528 | 264.434136 | 264.4235264 | 264.1484192 | 261.1618824 |
| 264.443232 | 264.4478688 | 264.4350528 | 264.433136 | 264.4235264 | 264.1454192 | 261.1588824 |
| 264.445232 | 264.4478688 | 264.4370528 | 264.433136 | 264.4215264 | 264.1474192 | 261.1598824 |
| 264.445232 | 264.4468688 | 264.4380528 | 264.433136 | 264.4265264 | 264.1474192 | 261.1608824 |
| 264.447232 | 264.4498688 | 264.4400528 | 264.435136 | 264.4265264 | 264.1464192 | 261.1628824 |
| 264.444232 | 264.4468688 | 264.4350528 | 264.432136 | 264.4235264 | 264.1464192 | 261.1578824 |
| 264.445232 | 264.4468688 | 264.4360528 | 264.434136 | 264.4245264 | 264.1444192 | 261.1608824 |
| 264.445232 | 264.4488688 | 264.4380528 | 264.435136 | 264.4245264 | 264.1474192 | 261.1598824 |
| 264.445232 | 264.4498688 | 264.4380528 | 264.435136 | 264.4245264 | 264.1464192 | 261.1598824 |
| 264.447232 | 264.4468688 | 264.4390528 | 264.433136 | 264.4255264 | 264.1494192 | 261.1588824 |
| 264.445232 | 264.4488688 | 264.4380528 | 264.433136 | 264.4245264 | 264.1474192 | 261.1608824 |
| 264.445232 | 264.4468688 | 264.4380528 | 264.435136 | 264.4245264 | 264.1424192 | 261.1578824 |
| 264.446232 | 264.4468688 | 264.4370528 | 264.432136 | 264.4235264 | 264.1434192 | 261.1568824 |
| 264.449232 | 264.4488688 | 264.4390528 | 264.435136 | 264.4265264 | 264.1474192 | 261.1598824 |
| 264.448232 | 264.4498688 | 264.4370528 | 264.437136 | 264.4255264 | 264.1474192 | 261.1578824 |
| 264.448232 | 264.4488688 | 264.4380528 | 264.435136 | 264.4255264 | 264.1474192 | 261.1578824 |
| 264.447232 | 264.4488688 | 264.4360528 | 264.435136 | 264.4245264 | 264.1454192 | 261.1588824 |
| 264.448232 | 264.4498688 | 264.4370528 | 264.436136 | 264.4255264 | 264.1484192 | 261.1588824 |
| 264.447232 | 264.4498688 | 264.4360528 | 264.435136 | 264.4265264 | 264.1484192 | 261.1568824 |
| 264.450232 | 264.4488688 | 264.4370528 | 264.437136 | 264.4275264 | 264.1494192 | 261.1568824 |
| 264.449232 | 264.4488688 | 264.4370528 | 264.436136 | 264.4275264 | 264.1474192 | 261.1568824 |
| 264.449232 | 264.4478688 | 264.4360528 | 264.436136 | 264.4275264 | 264.1474192 | 261.1568824 |

|            |             |             |            |             |             |             |
|------------|-------------|-------------|------------|-------------|-------------|-------------|
| 264.449232 | 264.4498688 | 264.4340528 | 264.436136 | 264.4255264 | 264.1514192 | 261.1568824 |
| 264.448232 | 264.4498688 | 264.4380528 | 264.435136 | 264.4245264 | 264.1484192 | 261.1588824 |
| 264.450232 | 264.4518688 | 264.4370528 | 264.437136 | 264.4275264 | 264.1504192 | 261.1598824 |
| 264.452232 | 264.4508688 | 264.4390528 | 264.437136 | 264.4305264 | 264.1504192 | 261.1598824 |
| 264.451232 | 264.4528688 | 264.4410528 | 264.440136 | 264.4295264 | 264.1534192 | 261.1628824 |
| 264.447232 | 264.4488688 | 264.4360528 | 264.435136 | 264.4265264 | 264.1504192 | 261.1578824 |
| 264.447232 | 264.4498688 | 264.4380528 | 264.437136 | 264.4245264 | 264.1484192 | 261.1598824 |
| 264.446232 | 264.4488688 | 264.4350528 | 264.434136 | 264.4255264 | 264.1474192 | 261.1568824 |
| 264.448232 | 264.4488688 | 264.4370528 | 264.434136 | 264.4235264 | 264.1484192 | 261.1578824 |
| 264.447232 | 264.4488688 | 264.4360528 | 264.434136 | 264.4235264 | 264.1484192 | 261.1578824 |
| 264.447232 | 264.4468688 | 264.4380528 | 264.432136 | 264.4245264 | 264.1504192 | 261.1608824 |
| 264.447232 | 264.4488688 | 264.4380528 | 264.434136 | 264.4235264 | 264.1504192 | 261.1598824 |
| 264.447232 | 264.4488688 | 264.4380528 | 264.433136 | 264.4245264 | 264.1494192 | 261.1608824 |
| 264.447232 | 264.4488688 | 264.4390528 | 264.432136 | 264.4245264 | 264.1474192 | 261.1608824 |
| 264.444232 | 264.4438688 | 264.4380528 | 264.430136 | 264.4195264 | 264.1444192 | 261.1578824 |
| 264.443232 | 264.4458688 | 264.4390528 | 264.430136 | 264.4205264 | 264.1464192 | 261.1608824 |
| 264.441232 | 264.4458688 | 264.4390528 | 264.430136 | 264.4195264 | 264.1444192 | 261.1628824 |
| 264.440232 | 264.4418688 | 264.4380528 | 264.427136 | 264.4155264 | 264.1404192 | 261.1598824 |
| 264.438232 | 264.4418688 | 264.4380528 | 264.423136 | 264.4155264 | 264.1374192 | 261.1608824 |
| 264.436232 | 264.4418688 | 264.4380528 | 264.425136 | 264.4155264 | 264.1384192 | 261.1628824 |
| 264.432232 | 264.4378688 | 264.4330528 | 264.419136 | 264.4115264 | 264.1364192 | 261.1598824 |
| 264.433232 | 264.4378688 | 264.4360528 | 264.422136 | 264.4125264 | 264.1354192 | 261.1628824 |
| 264.432232 | 264.4358688 | 264.4350528 | 264.417136 | 264.4085264 | 264.1324192 | 261.1598824 |
| 264.433232 | 264.4378688 | 264.4380528 | 264.422136 | 264.4105264 | 264.1354192 | 261.1628824 |
| 264.428232 | 264.4318688 | 264.4330528 | 264.415136 | 264.4045264 | 264.1324192 | 261.1608824 |
| 264.427232 | 264.4328688 | 264.4320528 | 264.415136 | 264.4075264 | 264.1304192 | 261.1598824 |
| 264.424232 | 264.4308688 | 264.4320528 | 264.410136 | 264.4005264 | 264.1284192 | 261.1608824 |
| 264.425232 | 264.4308688 | 264.4320528 | 264.412136 | 264.4015264 | 264.1314192 | 261.1608824 |
| 264.424232 | 264.4298688 | 264.4330528 | 264.411136 | 264.4025264 | 264.1284192 | 261.1598824 |
| 264.420232 | 264.4268688 | 264.4330528 | 264.407136 | 264.3995264 | 264.1254192 | 261.1598824 |
| 264.420232 | 264.4258688 | 264.4290528 | 264.409136 | 264.3975264 | 264.1264192 | 261.1608824 |
| 264.420232 | 264.4278688 | 264.4320528 | 264.409136 | 264.3985264 | 264.1224192 | 261.1588824 |
| 264.418232 | 264.4218688 | 264.4290528 | 264.404136 | 264.3935264 | 264.1194192 | 261.1558824 |
| 264.416232 | 264.4248688 | 264.4300528 | 264.405136 | 264.3955264 | 264.1204192 | 261.1558824 |
| 264.419232 | 264.4258688 | 264.4310528 | 264.405136 | 264.3945264 | 264.1214192 | 261.1588824 |
| 264.418232 | 264.4238688 | 264.4310528 | 264.406136 | 264.3945264 | 264.1214192 | 261.1568824 |
| 264.416232 | 264.4228688 | 264.4290528 | 264.403136 | 264.3925264 | 264.1204192 | 261.1548824 |
| 264.414232 | 264.4218688 | 264.4280528 | 264.403136 | 264.3905264 | 264.1184192 | 261.1568824 |
| 264.415232 | 264.4218688 | 264.4280528 | 264.403136 | 264.3915264 | 264.1214192 | 261.1558824 |
| 264.415232 | 264.4208688 | 264.4280528 | 264.403136 | 264.3935264 | 264.1204192 | 261.1578824 |
| 264.412232 | 264.4208688 | 264.4270528 | 264.401136 | 264.3905264 | 264.1184192 | 261.1528824 |
| 264.409232 | 264.4158688 | 264.4240528 | 264.397136 | 264.3875264 | 264.1154192 | 261.1508824 |
| 264.412232 | 264.4188688 | 264.4250528 | 264.400136 | 264.3885264 | 264.1174192 | 261.1538824 |
| 264.410232 | 264.4178688 | 264.4260528 | 264.397136 | 264.3855264 | 264.1144192 | 261.1508824 |
| 264.412232 | 264.4158688 | 264.4240528 | 264.397136 | 264.3875264 | 264.1184192 | 261.1508824 |
| 264.410232 | 264.4168688 | 264.4210528 | 264.394136 | 264.3855264 | 264.1144192 | 261.1478824 |
| 264.412232 | 264.4178688 | 264.4260528 | 264.397136 | 264.3875264 | 264.1164192 | 261.1488824 |

|            |             |             |            |             |             |             |
|------------|-------------|-------------|------------|-------------|-------------|-------------|
| 264.412232 | 264.4158688 | 264.4240528 | 264.399136 | 264.3875264 | 264.1144192 | 261.1488824 |
| 264.408232 | 264.4148688 | 264.4220528 | 264.395136 | 264.3845264 | 264.1144192 | 261.1478824 |
| 264.411232 | 264.4178688 | 264.4220528 | 264.398136 | 264.3855264 | 264.1154192 | 261.1488824 |
| 264.408232 | 264.4168688 | 264.4210528 | 264.397136 | 264.3875264 | 264.1134192 | 261.1488824 |
| 264.410232 | 264.4158688 | 264.4210528 | 264.397136 | 264.3875264 | 264.1184192 | 261.1478824 |
| 264.408232 | 264.4148688 | 264.4210528 | 264.395136 | 264.3855264 | 264.1164192 | 261.1458824 |
| 264.409232 | 264.4158688 | 264.4220528 | 264.397136 | 264.3855264 | 264.1154192 | 261.1438824 |
| 264.408232 | 264.4128688 | 264.4190528 | 264.394136 | 264.3855264 | 264.1184192 | 261.1438824 |
| 264.410232 | 264.4148688 | 264.4210528 | 264.395136 | 264.3855264 | 264.1184192 | 261.1428824 |
| 264.410232 | 264.4148688 | 264.4190528 | 264.395136 | 264.3875264 | 264.1164192 | 261.1428824 |
| 264.410232 | 264.4168688 | 264.4190528 | 264.395136 | 264.3855264 | 264.1164192 | 261.1428824 |
| 264.412232 | 264.4168688 | 264.4190528 | 264.399136 | 264.3875264 | 264.1214192 | 261.1428824 |
| 264.412232 | 264.4168688 | 264.4190528 | 264.399136 | 264.3875264 | 264.1164192 | 261.1398824 |
| 264.415232 | 264.4178688 | 264.4210528 | 264.402136 | 264.3915264 | 264.1204192 | 261.1408824 |
| 264.416232 | 264.4198688 | 264.4220528 | 264.406136 | 264.3955264 | 264.1244192 | 261.1418824 |
| 264.418232 | 264.4198688 | 264.4200528 | 264.406136 | 264.3955264 | 264.1244192 | 261.1418824 |
| 264.422232 | 264.4248688 | 264.4210528 | 264.411136 | 264.3995264 | 264.1284192 | 261.1408824 |
| 264.422232 | 264.4248688 | 264.4210528 | 264.411136 | 264.4015264 | 264.1324192 | 261.1378824 |
| 264.428232 | 264.4268688 | 264.4200528 | 264.415136 | 264.4015264 | 264.1334192 | 261.1378824 |
| 264.431232 | 264.4318688 | 264.4210528 | 264.419136 | 264.4065264 | 264.1384192 | 261.1388824 |
| 264.430232 | 264.4318688 | 264.4210528 | 264.419136 | 264.4085264 | 264.1404192 | 261.1358824 |
| 264.432232 | 264.4338688 | 264.4220528 | 264.423136 | 264.4105264 | 264.1424192 | 261.1378824 |
| 264.436232 | 264.4368688 | 264.4220528 | 264.426136 | 264.4135264 | 264.1464192 | 261.1378824 |
| 264.440232 | 264.4388688 | 264.4260528 | 264.429136 | 264.4195264 | 264.1504192 | 261.1388824 |
| 264.440232 | 264.4408688 | 264.4240528 | 264.429136 | 264.4195264 | 264.1504192 | 261.1378824 |
| 264.445232 | 264.4438688 | 264.4260528 | 264.434136 | 264.4235264 | 264.1554192 | 261.1368824 |
| 264.447232 | 264.4468688 | 264.4270528 | 264.435136 | 264.4245264 | 264.1604192 | 261.1348824 |
| 264.449232 | 264.4488688 | 264.4280528 | 264.437136 | 264.4245264 | 264.1614192 | 261.1368824 |
| 264.450232 | 264.4488688 | 264.4280528 | 264.439136 | 264.4265264 | 264.1614192 | 261.1388824 |
| 264.450232 | 264.4488688 | 264.4270528 | 264.439136 | 264.4295264 | 264.1644192 | 261.1358824 |
| 264.451232 | 264.4498688 | 264.4280528 | 264.438136 | 264.4265264 | 264.1634192 | 261.1348824 |
| 264.452232 | 264.4518688 | 264.4290528 | 264.441136 | 264.4315264 | 264.1644192 | 261.1378824 |
| 264.453232 | 264.4528688 | 264.4290528 | 264.441136 | 264.4295264 | 264.1644192 | 261.1398824 |
| 264.453232 | 264.4528688 | 264.4310528 | 264.441136 | 264.4315264 | 264.1644192 | 261.1398824 |
| 264.453232 | 264.4538688 | 264.4310528 | 264.441136 | 264.4335264 | 264.1614192 | 261.1398824 |
| 264.451232 | 264.4528688 | 264.4320528 | 264.441136 | 264.4295264 | 264.1634192 | 261.1398824 |
| 264.453232 | 264.4538688 | 264.4330528 | 264.440136 | 264.4315264 | 264.1614192 | 261.1418824 |
| 264.450232 | 264.4528688 | 264.4350528 | 264.440136 | 264.4315264 | 264.1614192 | 261.1438824 |
| 264.453232 | 264.4528688 | 264.4350528 | 264.439136 | 264.4315264 | 264.1614192 | 261.1468824 |
| 264.448232 | 264.4508688 | 264.4320528 | 264.438136 | 264.4285264 | 264.1584192 | 261.1478824 |
| 264.448232 | 264.4498688 | 264.4330528 | 264.437136 | 264.4285264 | 264.1564192 | 261.1468824 |
| 264.445232 | 264.4498688 | 264.4320528 | 264.434136 | 264.4255264 | 264.1544192 | 261.1488824 |
| 264.447232 | 264.4508688 | 264.4350528 | 264.436136 | 264.4295264 | 264.1544192 | 261.1528824 |
| 264.448232 | 264.4498688 | 264.4350528 | 264.435136 | 264.4265264 | 264.1504192 | 261.1518824 |
| 264.448232 | 264.4498688 | 264.4330528 | 264.433136 | 264.4245264 | 264.1504192 | 261.1528824 |
| 264.445232 | 264.4468688 | 264.4340528 | 264.434136 | 264.4235264 | 264.1474192 | 261.1528824 |
| 264.446232 | 264.4498688 | 264.4340528 | 264.434136 | 264.4255264 | 264.1534192 | 261.1548824 |

|            |             |             |            |             |             |             |
|------------|-------------|-------------|------------|-------------|-------------|-------------|
| 264.450232 | 264.4508688 | 264.4370528 | 264.435136 | 264.4245264 | 264.1524192 | 261.1578824 |
| 264.448232 | 264.4508688 | 264.4370528 | 264.435136 | 264.4235264 | 264.1504192 | 261.1598824 |
| 264.445232 | 264.4468688 | 264.4360528 | 264.434136 | 264.4235264 | 264.1474192 | 261.1568824 |
| 264.443232 | 264.4468688 | 264.4360528 | 264.432136 | 264.4215264 | 264.1484192 | 261.1578824 |
| 264.446232 | 264.4498688 | 264.4370528 | 264.434136 | 264.4255264 | 264.1514192 | 261.1618824 |
| 264.443232 | 264.4488688 | 264.4380528 | 264.430136 | 264.4215264 | 264.1484192 | 261.1598824 |
| 264.442232 | 264.4468688 | 264.4340528 | 264.431136 | 264.4205264 | 264.1464192 | 261.1588824 |
| 264.444232 | 264.4468688 | 264.4340528 | 264.431136 | 264.4225264 | 264.1484192 | 261.1598824 |
| 264.440232 | 264.4458688 | 264.4350528 | 264.429136 | 264.4195264 | 264.1474192 | 261.1598824 |
| 264.441232 | 264.4458688 | 264.4330528 | 264.429136 | 264.4195264 | 264.1454192 | 261.1588824 |
| 264.443232 | 264.4458688 | 264.4350528 | 264.431136 | 264.4215264 | 264.1454192 | 261.1608824 |
| 264.441232 | 264.4448688 | 264.4340528 | 264.428136 | 264.4185264 | 264.1424192 | 261.1608824 |
| 264.438232 | 264.4418688 | 264.4320528 | 264.428136 | 264.4185264 | 264.1444192 | 261.1598824 |
| 264.440232 | 264.4448688 | 264.4330528 | 264.429136 | 264.4175264 | 264.1454192 | 261.1578824 |
| 264.439232 | 264.4418688 | 264.4330528 | 264.424136 | 264.4145264 | 264.1444192 | 261.1588824 |
| 264.439232 | 264.4438688 | 264.4350528 | 264.429136 | 264.4195264 | 264.1454192 | 261.1598824 |
| 264.437232 | 264.4418688 | 264.4320528 | 264.425136 | 264.4145264 | 264.1414192 | 261.1588824 |
| 264.440232 | 264.4418688 | 264.4340528 | 264.426136 | 264.4165264 | 264.1434192 | 261.1588824 |
| 264.437232 | 264.4408688 | 264.4340528 | 264.425136 | 264.4145264 | 264.1414192 | 261.1568824 |
| 264.437232 | 264.4408688 | 264.4350528 | 264.426136 | 264.4155264 | 264.1414192 | 261.1578824 |
| 264.437232 | 264.4388688 | 264.4330528 | 264.425136 | 264.4155264 | 264.1414192 | 261.1578824 |
| 264.438232 | 264.4398688 | 264.4320528 | 264.425136 | 264.4155264 | 264.1424192 | 261.1568824 |
| 264.438232 | 264.4428688 | 264.4350528 | 264.425136 | 264.4155264 | 264.1424192 | 261.1578824 |
| 264.435232 | 264.4398688 | 264.4330528 | 264.428136 | 264.4155264 | 264.1404192 | 261.1568824 |
| 264.441232 | 264.4418688 | 264.4330528 | 264.428136 | 264.4185264 | 264.1414192 | 261.1568824 |
| 264.435232 | 264.4388688 | 264.4320528 | 264.420136 | 264.4125264 | 264.1414192 | 261.1558824 |
| 264.437232 | 264.4408688 | 264.4340528 | 264.425136 | 264.4165264 | 264.1434192 | 261.1548824 |
| 264.435232 | 264.4388688 | 264.4310528 | 264.424136 | 264.4145264 | 264.1414192 | 261.1548824 |
| 264.436232 | 264.4398688 | 264.4300528 | 264.423136 | 264.4155264 | 264.1424192 | 261.1568824 |
| 264.435232 | 264.4388688 | 264.4290528 | 264.423136 | 264.4145264 | 264.1414192 | 261.1538824 |
| 264.437232 | 264.4388688 | 264.4320528 | 264.425136 | 264.4155264 | 264.1434192 | 261.1538824 |
| 264.437232 | 264.4398688 | 264.4330528 | 264.426136 | 264.4175264 | 264.1404192 | 261.1558824 |
| 264.436232 | 264.4388688 | 264.4320528 | 264.424136 | 264.4155264 | 264.1444192 | 261.1548824 |
| 264.437232 | 264.4408688 | 264.4320528 | 264.425136 | 264.4175264 | 264.1414192 | 261.1548824 |
| 264.438232 | 264.4408688 | 264.4320528 | 264.425136 | 264.4155264 | 264.1454192 | 261.1568824 |
| 264.437232 | 264.4408688 | 264.4310528 | 264.426136 | 264.4175264 | 264.1434192 | 261.1548824 |
| 264.440232 | 264.4398688 | 264.4310528 | 264.428136 | 264.4185264 | 264.1424192 | 261.1538824 |
| 264.438232 | 264.4408688 | 264.4310528 | 264.426136 | 264.4185264 | 264.1444192 | 261.1518824 |
| 264.441232 | 264.4428688 | 264.4310528 | 264.431136 | 264.4195264 | 264.1474192 | 261.1558824 |
| 264.442232 | 264.4428688 | 264.4320528 | 264.428136 | 264.4205264 | 264.1464192 | 261.1528824 |
| 264.440232 | 264.4418688 | 264.4340528 | 264.430136 | 264.4205264 | 264.1474192 | 261.1528824 |
| 264.442232 | 264.4448688 | 264.4320528 | 264.431136 | 264.4225264 | 264.1484192 | 261.1508824 |
| 264.443232 | 264.4448688 | 264.4320528 | 264.430136 | 264.4205264 | 264.1494192 | 261.1508824 |
| 264.443232 | 264.4448688 | 264.4330528 | 264.430136 | 264.4225264 | 264.1494192 | 261.1528824 |
| 264.442232 | 264.4438688 | 264.4300528 | 264.431136 | 264.4195264 | 264.1484192 | 261.1518824 |
| 264.444232 | 264.4458688 | 264.4320528 | 264.432136 | 264.4235264 | 264.1524192 | 261.1518824 |
| 264.444232 | 264.4468688 | 264.4320528 | 264.432136 | 264.4235264 | 264.1524192 | 261.1538824 |

|            |             |             |            |             |             |             |
|------------|-------------|-------------|------------|-------------|-------------|-------------|
| 264.444232 | 264.4458688 | 264.4300528 | 264.431136 | 264.4235264 | 264.1504192 | 261.1518824 |
| 264.447232 | 264.4488688 | 264.4330528 | 264.435136 | 264.4255264 | 264.1534192 | 261.1538824 |
| 264.447232 | 264.4488688 | 264.4350528 | 264.435136 | 264.4265264 | 264.1534192 | 261.1548824 |
| 264.448232 | 264.4488688 | 264.4340528 | 264.436136 | 264.4265264 | 264.1544192 | 261.1548824 |
| 264.445232 | 264.4478688 | 264.4310528 | 264.433136 | 264.4245264 | 264.1514192 | 261.1528824 |
| 264.446232 | 264.4478688 | 264.4320528 | 264.435136 | 264.4245264 | 264.1544192 | 261.1548824 |
| 264.447232 | 264.4488688 | 264.4350528 | 264.436136 | 264.4265264 | 264.1574192 | 261.1548824 |
| 264.445232 | 264.4478688 | 264.4330528 | 264.434136 | 264.4255264 | 264.1534192 | 261.1518824 |
| 264.448232 | 264.4478688 | 264.4360528 | 264.435136 | 264.4265264 | 264.1564192 | 261.1568824 |
| 264.448232 | 264.4508688 | 264.4360528 | 264.437136 | 264.4265264 | 264.1544192 | 261.1568824 |
| 264.449232 | 264.4508688 | 264.4370528 | 264.438136 | 264.4285264 | 264.1574192 | 261.1548824 |
| 264.449232 | 264.4508688 | 264.4370528 | 264.437136 | 264.4285264 | 264.1554192 | 261.1548824 |
| 264.449232 | 264.4498688 | 264.4350528 | 264.437136 | 264.4245264 | 264.1554192 | 261.1558824 |
| 264.446232 | 264.4498688 | 264.4360528 | 264.435136 | 264.4255264 | 264.1544192 | 261.1568824 |
| 264.447232 | 264.4478688 | 264.4360528 | 264.434136 | 264.4255264 | 264.1564192 | 261.1568824 |
| 264.449232 | 264.4498688 | 264.4360528 | 264.435136 | 264.4255264 | 264.1554192 | 261.1588824 |
| 264.445232 | 264.4498688 | 264.4360528 | 264.432136 | 264.4255264 | 264.1534192 | 261.1588824 |
| 264.444232 | 264.4488688 | 264.4350528 | 264.431136 | 264.4225264 | 264.1504192 | 261.1568824 |
| 264.444232 | 264.4468688 | 264.4330528 | 264.431136 | 264.4195264 | 264.1464192 | 261.1558824 |
| 264.443232 | 264.4448688 | 264.4350528 | 264.431136 | 264.4205264 | 264.1504192 | 261.1568824 |
| 264.443232 | 264.4468688 | 264.4360528 | 264.431136 | 264.4235264 | 264.1494192 | 261.1598824 |
| 264.442232 | 264.4438688 | 264.4330528 | 264.428136 | 264.4205264 | 264.1464192 | 261.1588824 |
| 264.440232 | 264.4438688 | 264.4350528 | 264.427136 | 264.4205264 | 264.1484192 | 261.1588824 |
| 264.441232 | 264.4438688 | 264.4360528 | 264.428136 | 264.4195264 | 264.1454192 | 261.1588824 |
| 264.438232 | 264.4408688 | 264.4340528 | 264.425136 | 264.4165264 | 264.1424192 | 261.1578824 |
| 264.438232 | 264.4428688 | 264.4360528 | 264.426136 | 264.4185264 | 264.1404192 | 261.1598824 |
| 264.436232 | 264.4408688 | 264.4340528 | 264.423136 | 264.4145264 | 264.1424192 | 261.1608824 |
| 264.434232 | 264.4378688 | 264.4330528 | 264.422136 | 264.4135264 | 264.1414192 | 261.1598824 |
| 264.432232 | 264.4378688 | 264.4320528 | 264.420136 | 264.4115264 | 264.1404192 | 261.1598824 |
| 264.433232 | 264.4378688 | 264.4340528 | 264.420136 | 264.4115264 | 264.1374192 | 261.1598824 |
| 264.430232 | 264.4348688 | 264.4340528 | 264.418136 | 264.4095264 | 264.1374192 | 261.1608824 |
| 264.431232 | 264.4338688 | 264.4330528 | 264.417136 | 264.4085264 | 264.1354192 | 261.1598824 |
| 264.425232 | 264.4318688 | 264.4310528 | 264.415136 | 264.4065264 | 264.1354192 | 261.1598824 |
| 264.427232 | 264.4318688 | 264.4330528 | 264.412136 | 264.4045264 | 264.1334192 | 261.1578824 |
| 264.425232 | 264.4308688 | 264.4310528 | 264.415136 | 264.4045264 | 264.1304192 | 261.1598824 |
| 264.424232 | 264.4268688 | 264.4310528 | 264.410136 | 264.4015264 | 264.1304192 | 261.1578824 |
| 264.424232 | 264.4288688 | 264.4310528 | 264.412136 | 264.4015264 | 264.1284192 | 261.1598824 |
| 264.421232 | 264.4288688 | 264.4300528 | 264.412136 | 264.4005264 | 264.1274192 | 261.1588824 |
| 264.420232 | 264.4258688 | 264.4290528 | 264.409136 | 264.3995264 | 264.1264192 | 261.1558824 |
| 264.420232 | 264.4268688 | 264.4290528 | 264.407136 | 264.3975264 | 264.1284192 | 261.1558824 |
| 264.419232 | 264.4238688 | 264.4280528 | 264.408136 | 264.3975264 | 264.1254192 | 261.1578824 |
| 264.418232 | 264.4238688 | 264.4280528 | 264.405136 | 264.3965264 | 264.1244192 | 261.1568824 |
| 264.417232 | 264.4218688 | 264.4260528 | 264.403136 | 264.3955264 | 264.1234192 | 261.1568824 |
| 264.417232 | 264.4238688 | 264.4260528 | 264.405136 | 264.3955264 | 264.1254192 | 261.1558824 |
| 264.415232 | 264.4208688 | 264.4260528 | 264.402136 | 264.3955264 | 264.1214192 | 261.1538824 |
| 264.414232 | 264.4208688 | 264.4260528 | 264.403136 | 264.3915264 | 264.1214192 | 261.1558824 |
| 264.414232 | 264.4208688 | 264.4250528 | 264.402136 | 264.3915264 | 264.1234192 | 261.1528824 |

|            |             |             |            |             |             |             |
|------------|-------------|-------------|------------|-------------|-------------|-------------|
| 264.417232 | 264.4208688 | 264.4280528 | 264.403136 | 264.3935264 | 264.1234192 | 261.1558824 |
| 264.415232 | 264.4158688 | 264.4240528 | 264.399136 | 264.3915264 | 264.1234192 | 261.1528824 |
| 264.414232 | 264.4198688 | 264.4240528 | 264.402136 | 264.3915264 | 264.1194192 | 261.1518824 |
| 264.412232 | 264.4168688 | 264.4230528 | 264.399136 | 264.3895264 | 264.1214192 | 261.1498824 |
| 264.413232 | 264.4178688 | 264.4240528 | 264.401136 | 264.3895264 | 264.1214192 | 261.1518824 |
| 264.411232 | 264.4168688 | 264.4240528 | 264.399136 | 264.3895264 | 264.1214192 | 261.1518824 |
| 264.410232 | 264.4148688 | 264.4190528 | 264.398136 | 264.3865264 | 264.1224192 | 261.1488824 |
| 264.411232 | 264.4158688 | 264.4240528 | 264.399136 | 264.3875264 | 264.1194192 | 261.1498824 |
| 264.412232 | 264.4158688 | 264.4220528 | 264.400136 | 264.3885264 | 264.1204192 | 261.1498824 |
| 264.412232 | 264.4188688 | 264.4240528 | 264.400136 | 264.3915264 | 264.1224192 | 261.1508824 |
| 264.411232 | 264.4158688 | 264.4230528 | 264.400136 | 264.3885264 | 264.1214192 | 261.1478824 |
| 264.412232 | 264.4148688 | 264.4220528 | 264.399136 | 264.3895264 | 264.1174192 | 261.1468824 |
| 264.414232 | 264.4178688 | 264.4220528 | 264.399136 | 264.3885264 | 264.1224192 | 261.1478824 |
| 264.414232 | 264.4178688 | 264.4220528 | 264.400136 | 264.3925264 | 264.1244192 | 261.1468824 |
| 264.414232 | 264.4158688 | 264.4220528 | 264.402136 | 264.3885264 | 264.1224192 | 261.1448824 |
| 264.415232 | 264.4168688 | 264.4210528 | 264.402136 | 264.3905264 | 264.1214192 | 261.1448824 |
| 264.411232 | 264.4158688 | 264.4210528 | 264.400136 | 264.3905264 | 264.1254192 | 261.1428824 |
| 264.413232 | 264.4188688 | 264.4190528 | 264.400136 | 264.3905264 | 264.1234192 | 261.1408824 |
| 264.417232 | 264.4188688 | 264.4190528 | 264.405136 | 264.3935264 | 264.1254192 | 261.1408824 |
| 264.416232 | 264.4218688 | 264.4190528 | 264.406136 | 264.3965264 | 264.1304192 | 261.1428824 |
| 264.423232 | 264.4268688 | 264.4220528 | 264.411136 | 264.3995264 | 264.1334192 | 261.1438824 |
| 264.424232 | 264.4258688 | 264.4200528 | 264.413136 | 264.4025264 | 264.1334192 | 261.1398824 |
| 264.427232 | 264.4288688 | 264.4210528 | 264.418136 | 264.4075264 | 264.1374192 | 261.1408824 |
| 264.431232 | 264.4308688 | 264.4230528 | 264.419136 | 264.4085264 | 264.1394192 | 261.1408824 |
| 264.434232 | 264.4338688 | 264.4220528 | 264.422136 | 264.4115264 | 264.1434192 | 261.1408824 |
| 264.437232 | 264.4368688 | 264.4230528 | 264.425136 | 264.4145264 | 264.1484192 | 261.1398824 |
| 264.437232 | 264.4368688 | 264.4250528 | 264.427136 | 264.4125264 | 264.1474192 | 261.1388824 |
| 264.441232 | 264.4398688 | 264.4260528 | 264.429136 | 264.4185264 | 264.1534192 | 261.1398824 |
| 264.444232 | 264.4428688 | 264.4250528 | 264.430136 | 264.4195264 | 264.1554192 | 261.1408824 |
| 264.443232 | 264.4458688 | 264.4260528 | 264.434136 | 264.4235264 | 264.1574192 | 261.1408824 |
| 264.445232 | 264.4448688 | 264.4260528 | 264.432136 | 264.4225264 | 264.1574192 | 261.1408824 |
| 264.441232 | 264.4438688 | 264.4240528 | 264.430136 | 264.4195264 | 264.1554192 | 261.1388824 |
| 264.441232 | 264.4428688 | 264.4260528 | 264.431136 | 264.4205264 | 264.1564192 | 261.1388824 |
| 264.444232 | 264.4448688 | 264.4270528 | 264.431136 | 264.4215264 | 264.1554192 | 261.1398824 |
| 264.443232 | 264.4438688 | 264.4280528 | 264.429136 | 264.4215264 | 264.1534192 | 261.1398824 |
| 264.445232 | 264.4458688 | 264.4280528 | 264.434136 | 264.4225264 | 264.1554192 | 261.1408824 |
| 264.445232 | 264.4438688 | 264.4280528 | 264.432136 | 264.4225264 | 264.1514192 | 261.1408824 |
| 264.444232 | 264.4458688 | 264.4290528 | 264.434136 | 264.4245264 | 264.1544192 | 261.1408824 |
| 264.444232 | 264.4448688 | 264.4290528 | 264.432136 | 264.4225264 | 264.1554192 | 261.1408824 |
| 264.444232 | 264.4458688 | 264.4290528 | 264.433136 | 264.4225264 | 264.1584192 | 261.1448824 |
| 264.440232 | 264.4428688 | 264.4270528 | 264.428136 | 264.4205264 | 264.1524192 | 261.1428824 |
| 264.442232 | 264.4438688 | 264.4310528 | 264.430136 | 264.4195264 | 264.1494192 | 261.1448824 |
| 264.441232 | 264.4428688 | 264.4300528 | 264.429136 | 264.4215264 | 264.1514192 | 261.1458824 |
| 264.440232 | 264.4438688 | 264.4310528 | 264.429136 | 264.4175264 | 264.1504192 | 261.1468824 |
| 264.440232 | 264.4438688 | 264.4310528 | 264.430136 | 264.4185264 | 264.1494192 | 261.1498824 |
| 264.438232 | 264.4418688 | 264.4310528 | 264.424136 | 264.4185264 | 264.1464192 | 261.1508824 |
| 264.440232 | 264.4428688 | 264.4330528 | 264.428136 | 264.4205264 | 264.1484192 | 261.1528824 |



|            |             |             |            |             |             |             |
|------------|-------------|-------------|------------|-------------|-------------|-------------|
| 264.438232 | 264.4408688 | 264.4320528 | 264.428136 | 264.4195264 | 264.1464192 | 261.1528824 |
| 264.436232 | 264.4408688 | 264.4330528 | 264.426136 | 264.4185264 | 264.1464192 | 261.1518824 |
| 264.439232 | 264.4418688 | 264.4320528 | 264.427136 | 264.4185264 | 264.1464192 | 261.1548824 |
| 264.436232 | 264.4398688 | 264.4320528 | 264.425136 | 264.4165264 | 264.1424192 | 261.1538824 |
| 264.440232 | 264.4428688 | 264.4330528 | 264.425136 | 264.4195264 | 264.1464192 | 261.1558824 |
| 264.440232 | 264.4418688 | 264.4330528 | 264.427136 | 264.4185264 | 264.1454192 | 261.1548824 |
| 264.438232 | 264.4418688 | 264.4310528 | 264.427136 | 264.4195264 | 264.1454192 | 261.1548824 |
| 264.441232 | 264.4418688 | 264.4340528 | 264.428136 | 264.4185264 | 264.1454192 | 261.1578824 |
| 264.438232 | 264.4398688 | 264.4330528 | 264.424136 | 264.4165264 | 264.1434192 | 261.1558824 |
| 264.441232 | 264.4428688 | 264.4340528 | 264.427136 | 264.4205264 | 264.1434192 | 261.1588824 |
| 264.438232 | 264.4408688 | 264.4330528 | 264.425136 | 264.4165264 | 264.1454192 | 261.1568824 |
| 264.442232 | 264.4428688 | 264.4350528 | 264.429136 | 264.4205264 | 264.1474192 | 261.1598824 |
| 264.440232 | 264.4428688 | 264.4330528 | 264.427136 | 264.4205264 | 264.1464192 | 261.1588824 |
| 264.438232 | 264.4408688 | 264.4330528 | 264.427136 | 264.4185264 | 264.1444192 | 261.1568824 |
| 264.441232 | 264.4428688 | 264.4330528 | 264.428136 | 264.4195264 | 264.1464192 | 261.1578824 |
| 264.437232 | 264.4408688 | 264.4330528 | 264.427136 | 264.4195264 | 264.1474192 | 261.1578824 |
| 264.439232 | 264.4408688 | 264.4330528 | 264.428136 | 264.4175264 | 264.1474192 | 261.1598824 |
| 264.439232 | 264.4408688 | 264.4330528 | 264.427136 | 264.4175264 | 264.1434192 | 261.1598824 |
| 264.440232 | 264.4418688 | 264.4350528 | 264.429136 | 264.4205264 | 264.1464192 | 261.1588824 |
| 264.439232 | 264.4388688 | 264.4310528 | 264.426136 | 264.4175264 | 264.1434192 | 261.1578824 |
| 264.441232 | 264.4418688 | 264.4320528 | 264.429136 | 264.4225264 | 264.1414192 | 261.1568824 |
| 264.444232 | 264.4448688 | 264.4330528 | 264.432136 | 264.4235264 | 264.1464192 | 261.1568824 |
| 264.449232 | 264.4478688 | 264.4320528 | 264.438136 | 264.4295264 | 264.1474192 | 261.1618824 |
| 264.453232 | 264.4508688 | 264.4340528 | 264.441136 | 264.4335264 | 264.1544192 | 261.1618824 |
| 264.458232 | 264.4538688 | 264.4340528 | 264.445136 | 264.4365264 | 264.1574192 | 261.1578824 |
| 264.465232 | 264.4588688 | 264.4350528 | 264.451136 | 264.4435264 | 264.1644192 | 261.1618824 |
| 264.462232 | 264.4648688 | 264.4360528 | 264.457136 | 264.4455264 | 264.1744192 | 261.1608824 |
| 264.471232 | 264.4658688 | 264.4370528 | 264.459136 | 264.4495264 | 264.1804192 | 261.1578824 |
| 264.476232 | 264.4708688 | 264.4390528 | 264.465136 | 264.4555264 | 264.1924192 | 261.1608824 |
| 264.482232 | 264.4738688 | 264.4400528 | 264.470136 | 264.4595264 | 264.1974192 | 261.1608824 |
| 264.487232 | 264.4768688 | 264.4410528 | 264.474136 | 264.4645264 | 264.2064192 | 261.1608824 |
| 264.490232 | 264.4798688 | 264.4420528 | 264.479136 | 264.4655264 | 264.2114192 | 261.1618824 |
| 264.495232 | 264.4858688 | 264.4460528 | 264.484136 | 264.4695264 | 264.2164192 | 261.1628824 |
| 264.492232 | 264.4838688 | 264.4460528 | 264.482136 | 264.4705264 | 264.2194192 | 261.1638824 |
| 264.495232 | 264.4868688 | 264.4450528 | 264.484136 | 264.4715264 | 264.2194192 | 261.1628824 |
| 264.495232 | 264.4888688 | 264.4470528 | 264.484136 | 264.4735264 | 264.2214192 | 261.1668824 |
| 264.499232 | 264.4888688 | 264.4470528 | 264.484136 | 264.4755264 | 264.2214192 | 261.1678824 |
| 264.493232 | 264.4888688 | 264.4470528 | 264.484136 | 264.4715264 | 264.2164192 | 261.1718824 |
| 264.498232 | 264.4918688 | 264.4500528 | 264.487136 | 264.4765264 | 264.2184192 | 261.1778824 |
| 264.498232 | 264.4918688 | 264.4510528 | 264.487136 | 264.4765264 | 264.2174192 | 261.1788824 |
| 264.501232 | 264.4948688 | 264.4510528 | 264.493136 | 264.4815264 | 264.2224192 | 261.1818824 |
| 264.514232 | 264.5008688 | 264.4530528 | 264.503136 | 264.4935264 | 264.2274192 | 261.1888824 |
| 264.520232 | 264.5068688 | 264.4540528 | 264.509136 | 264.4975264 | 264.2414192 | 261.1898824 |
| 264.527232 | 264.5118688 | 264.4550528 | 264.515136 | 264.5045264 | 264.2524192 | 261.1918824 |
| 264.534232 | 264.5178688 | 264.4580528 | 264.521136 | 264.5095264 | 264.2644192 | 261.1948824 |
| 264.537232 | 264.5208688 | 264.4610528 | 264.526136 | 264.5145264 | 264.2714192 | 261.1978824 |
| 264.538232 | 264.5238688 | 264.4620528 | 264.527136 | 264.5155264 | 264.2744192 | 261.1978824 |

|            |             |             |            |             |             |             |
|------------|-------------|-------------|------------|-------------|-------------|-------------|
| 264.542232 | 264.5288688 | 264.4640528 | 264.529136 | 264.5185264 | 264.2744192 | 261.2008824 |
| 264.542232 | 264.5288688 | 264.4620528 | 264.530136 | 264.5185264 | 264.2794192 | 261.2018824 |
| 264.545232 | 264.5318688 | 264.4650528 | 264.533136 | 264.5225264 | 264.2814192 | 261.2038824 |
| 264.548232 | 264.5348688 | 264.4670528 | 264.536136 | 264.5255264 | 264.2824192 | 261.2078824 |
| 264.547232 | 264.5348688 | 264.4690528 | 264.538136 | 264.5275264 | 264.2794192 | 261.2098824 |
| 264.551232 | 264.5368688 | 264.4690528 | 264.538136 | 264.5275264 | 264.2794192 | 261.2108824 |
| 264.554232 | 264.5418688 | 264.4720528 | 264.542136 | 264.5315264 | 264.2844192 | 261.2188824 |
| 264.555232 | 264.5418688 | 264.4730528 | 264.543136 | 264.5345264 | 264.2834192 | 261.2178824 |
| 264.557232 | 264.5448688 | 264.4770528 | 264.545136 | 264.5365264 | 264.2894192 | 261.2228824 |
| 264.560232 | 264.5468688 | 264.4760528 | 264.548136 | 264.5395264 | 264.2874192 | 261.2258824 |
| 264.562232 | 264.5478688 | 264.4780528 | 264.549136 | 264.5395264 | 264.2904192 | 261.2258824 |
| 264.559232 | 264.5488688 | 264.4770528 | 264.548136 | 264.5365264 | 264.2894192 | 261.2268824 |
| 264.560232 | 264.5488688 | 264.4790528 | 264.550136 | 264.5405264 | 264.2854192 | 261.2268824 |
| 264.564232 | 264.5518688 | 264.4810528 | 264.553136 | 264.5435264 | 264.2884192 | 261.2328824 |
| 264.565232 | 264.5538688 | 264.4830528 | 264.553136 | 264.5435264 | 264.2884192 | 261.2348824 |
| 264.564232 | 264.5518688 | 264.4820528 | 264.550136 | 264.5425264 | 264.2874192 | 261.2338824 |
| 264.564232 | 264.5538688 | 264.4840528 | 264.552136 | 264.5425264 | 264.2854192 | 261.2348824 |
| 264.566232 | 264.5568688 | 264.4870528 | 264.555136 | 264.5475264 | 264.2854192 | 261.2378824 |
| 264.564232 | 264.5558688 | 264.4860528 | 264.552136 | 264.5465264 | 264.2824192 | 261.2388824 |
| 264.569232 | 264.5578688 | 264.4880528 | 264.557136 | 264.5505264 | 264.2834192 | 261.2388824 |
| 264.571232 | 264.5588688 | 264.4870528 | 264.559136 | 264.5525264 | 264.2834192 | 261.2388824 |
| 264.576232 | 264.5608688 | 264.4890528 | 264.565136 | 264.5565264 | 264.2914192 | 261.2378824 |
| 264.580232 | 264.5678688 | 264.4920528 | 264.570136 | 264.5625264 | 264.3044192 | 261.2398824 |
| 264.584232 | 264.5698688 | 264.4900528 | 264.573136 | 264.5655264 | 264.3144192 | 261.2438824 |
| 264.589232 | 264.5738688 | 264.4930528 | 264.580136 | 264.5705264 | 264.3214192 | 261.2438824 |
| 264.590232 | 264.5748688 | 264.4930528 | 264.579136 | 264.5695264 | 264.3254192 | 261.2458824 |
| 264.594232 | 264.5778688 | 264.4930528 | 264.582136 | 264.5735264 | 264.3294192 | 261.2438824 |
| 264.593232 | 264.5788688 | 264.4960528 | 264.582136 | 264.5725264 | 264.3294192 | 261.2438824 |
| 264.595232 | 264.5808688 | 264.4990528 | 264.585136 | 264.5745264 | 264.3294192 | 261.2488824 |
| 264.592232 | 264.5828688 | 264.4980528 | 264.584136 | 264.5715264 | 264.3284192 | 261.2478824 |
| 264.593232 | 264.5828688 | 264.5030528 | 264.586136 | 264.5745264 | 264.3254192 | 261.2528824 |
| 264.593232 | 264.5818688 | 264.4990528 | 264.583136 | 264.5755264 | 264.3214192 | 261.2538824 |
| 264.597232 | 264.5838688 | 264.5010528 | 264.589136 | 264.5775264 | 264.3204192 | 261.2578824 |
| 264.598232 | 264.5848688 | 264.5020528 | 264.590136 | 264.5805264 | 264.3234192 | 261.2588824 |
| 264.602232 | 264.5888688 | 264.5040528 | 264.592136 | 264.5815264 | 264.3234192 | 261.2598824 |
| 264.604232 | 264.5908688 | 264.5060528 | 264.594136 | 264.5835264 | 264.3254192 | 261.2628824 |
| 264.604232 | 264.5928688 | 264.5060528 | 264.594136 | 264.5855264 | 264.3284192 | 261.2628824 |
| 264.605232 | 264.5928688 | 264.5070528 | 264.596136 | 264.5845264 | 264.3294192 | 261.2618824 |
| 264.606232 | 264.5948688 | 264.5080528 | 264.596136 | 264.5865264 | 264.3294192 | 261.2658824 |
| 264.607232 | 264.5958688 | 264.5120528 | 264.596136 | 264.5875264 | 264.3334192 | 261.2648824 |
| 264.612232 | 264.5988688 | 264.5130528 | 264.598136 | 264.5905264 | 264.3324192 | 261.2668824 |
| 264.608232 | 264.5968688 | 264.5130528 | 264.596136 | 264.5875264 | 264.3304192 | 261.2658824 |
| 264.604232 | 264.5948688 | 264.5130528 | 264.595136 | 264.5845264 | 264.3264192 | 261.2638824 |
| 264.604232 | 264.5958688 | 264.5110528 | 264.595136 | 264.5865264 | 264.3214192 | 261.2648824 |
| 264.604232 | 264.5968688 | 264.5140528 | 264.595136 | 264.5885264 | 264.3194192 | 261.2668824 |
| 264.606232 | 264.5968688 | 264.5140528 | 264.593136 | 264.5845264 | 264.3214192 | 261.2698824 |
| 264.605232 | 264.5958688 | 264.5170528 | 264.595136 | 264.5855264 | 264.3174192 | 261.2688824 |

|            |             |             |            |             |             |             |
|------------|-------------|-------------|------------|-------------|-------------|-------------|
| 264.606232 | 264.5958688 | 264.5180528 | 264.594136 | 264.5855264 | 264.3144192 | 261.2678824 |
| 264.605232 | 264.5968688 | 264.5210528 | 264.596136 | 264.5875264 | 264.3144192 | 261.2708824 |
| 264.598232 | 264.5938688 | 264.5190528 | 264.590136 | 264.5825264 | 264.3064192 | 261.2718824 |
| 264.602232 | 264.5948688 | 264.5200528 | 264.592136 | 264.5855264 | 264.3074192 | 261.2708824 |
| 264.599232 | 264.5938688 | 264.5200528 | 264.588136 | 264.5815264 | 264.3014192 | 261.2718824 |
| 264.597232 | 264.5928688 | 264.5200528 | 264.587136 | 264.5825264 | 264.3004192 | 261.2688824 |
| 264.598232 | 264.5928688 | 264.5200528 | 264.586136 | 264.5795264 | 264.2974192 | 261.2708824 |
| 264.598232 | 264.5928688 | 264.5230528 | 264.586136 | 264.5805264 | 264.2984192 | 261.2708824 |
| 264.596232 | 264.5928688 | 264.5240528 | 264.588136 | 264.5795264 | 264.2954192 | 261.2708824 |
| 264.597232 | 264.5918688 | 264.5230528 | 264.586136 | 264.5785264 | 264.2904192 | 261.2708824 |
| 264.599232 | 264.5958688 | 264.5250528 | 264.587136 | 264.5825264 | 264.2914192 | 261.2738824 |
| 264.596232 | 264.5908688 | 264.5240528 | 264.583136 | 264.5775264 | 264.2904192 | 261.2718824 |
| 264.597232 | 264.5928688 | 264.5250528 | 264.586136 | 264.5795264 | 264.2894192 | 261.2718824 |
| 264.596232 | 264.5908688 | 264.5270528 | 264.586136 | 264.5765264 | 264.2864192 | 261.2718824 |
| 264.595232 | 264.5928688 | 264.5290528 | 264.584136 | 264.5795264 | 264.2864192 | 261.2738824 |
| 264.593232 | 264.5878688 | 264.5260528 | 264.581136 | 264.5755264 | 264.2814192 | 261.2708824 |
| 264.592232 | 264.5878688 | 264.5270528 | 264.579136 | 264.5725264 | 264.2814192 | 261.2698824 |
| 264.611232 | 264.5888688 | 264.5280528 | 264.579136 | 264.5725264 | 264.2814192 | 261.2698824 |
| 264.588232 | 264.5878688 | 264.5280528 | 264.580136 | 264.5715264 | 264.2794192 | 261.2708824 |
| 264.590232 | 264.5868688 | 264.5280528 | 264.579136 | 264.5725264 | 264.2784192 | 261.2678824 |
| 264.590232 | 264.5868688 | 264.5280528 | 264.579136 | 264.5715264 | 264.2754192 | 261.2698824 |
| 264.588232 | 264.5858688 | 264.5290528 | 264.578136 | 264.5725264 | 264.2784192 | 261.2688824 |
| 264.589232 | 264.5868688 | 264.5290528 | 264.576136 | 264.5705264 | 264.2764192 | 261.2678824 |
| 264.591232 | 264.5868688 | 264.5310528 | 264.576136 | 264.5705264 | 264.2744192 | 261.2688824 |
| 264.589232 | 264.5858688 | 264.5320528 | 264.576136 | 264.5695264 | 264.2754192 | 261.2688824 |
| 264.586232 | 264.5858688 | 264.5290528 | 264.575136 | 264.5705264 | 264.2714192 | 261.2658824 |
| 264.587232 | 264.5848688 | 264.5280528 | 264.574136 | 264.5705264 | 264.2714192 | 261.2648824 |
| 264.585232 | 264.5848688 | 264.5310528 | 264.572136 | 264.5685264 | 264.2714192 | 261.2648824 |
| 264.582232 | 264.5838688 | 264.5310528 | 264.574136 | 264.5685264 | 264.2694192 | 261.2658824 |
| 264.583232 | 264.5838688 | 264.5290528 | 264.573136 | 264.5665264 | 264.2694192 | 261.2638824 |
| 264.583232 | 264.5838688 | 264.5310528 | 264.572136 | 264.5675264 | 264.2684192 | 261.2648824 |
| 264.583232 | 264.5838688 | 264.5300528 | 264.573136 | 264.5675264 | 264.2704192 | 261.2648824 |
| 264.580232 | 264.5828688 | 264.5300528 | 264.570136 | 264.5655264 | 264.2654192 | 261.2628824 |
| 264.582232 | 264.5808688 | 264.5300528 | 264.570136 | 264.5625264 | 264.2674192 | 261.2598824 |
| 264.582232 | 264.5808688 | 264.5320528 | 264.569136 | 264.5625264 | 264.2654192 | 261.2628824 |
| 264.579232 | 264.5808688 | 264.5310528 | 264.569136 | 264.5625264 | 264.2644192 | 261.2618824 |
| 264.576232 | 264.5788688 | 264.5310528 | 264.564136 | 264.5615264 | 264.2614192 | 261.2608824 |
| 264.578232 | 264.5798688 | 264.5310528 | 264.566136 | 264.5615264 | 264.2614192 | 261.2618824 |
| 264.574232 | 264.5768688 | 264.5280528 | 264.564136 | 264.5585264 | 264.2564192 | 261.2588824 |
| 264.574232 | 264.5768688 | 264.5330528 | 264.563136 | 264.5585264 | 264.2564192 | 261.2638824 |
| 264.573232 | 264.5758688 | 264.5320528 | 264.560136 | 264.5575264 | 264.2564192 | 261.2608824 |
| 264.572232 | 264.5758688 | 264.5320528 | 264.560136 | 264.5535264 | 264.2534192 | 261.2598824 |
| 264.568232 | 264.5728688 | 264.5310528 | 264.555136 | 264.5505264 | 264.2504192 | 261.2578824 |
| 264.568232 | 264.5738688 | 264.5340528 | 264.558136 | 264.5515264 | 264.2494192 | 261.2608824 |
| 264.569232 | 264.5728688 | 264.5350528 | 264.558136 | 264.5535264 | 264.2484192 | 261.2608824 |
| 264.566232 | 264.5708688 | 264.5310528 | 264.554136 | 264.5465264 | 264.2424192 | 261.2568824 |
| 264.566232 | 264.5688688 | 264.5330528 | 264.553136 | 264.5475264 | 264.2434192 | 261.2588824 |

|            |             |             |            |             |             |             |
|------------|-------------|-------------|------------|-------------|-------------|-------------|
| 264.562232 | 264.5658688 | 264.5300528 | 264.548136 | 264.5435264 | 264.2384192 | 261.2578824 |
| 264.564232 | 264.5678688 | 264.5300528 | 264.550136 | 264.5445264 | 264.2384192 | 261.2558824 |
| 264.560232 | 264.5628688 | 264.5300528 | 264.548136 | 264.5415264 | 264.2364192 | 261.2528824 |
| 264.559232 | 264.5628688 | 264.5300528 | 264.545136 | 264.5395264 | 264.2334192 | 261.2548824 |
| 264.558232 | 264.5598688 | 264.5290528 | 264.544136 | 264.5365264 | 264.2324192 | 261.2498824 |
| 264.559232 | 264.5618688 | 264.5300528 | 264.547136 | 264.5375264 | 264.2344192 | 261.2508824 |
| 264.557232 | 264.5598688 | 264.5300528 | 264.544136 | 264.5375264 | 264.2334192 | 261.2498824 |
| 264.555232 | 264.5588688 | 264.5280528 | 264.542136 | 264.5345264 | 264.2294192 | 261.2498824 |
| 264.557232 | 264.5598688 | 264.5320528 | 264.542136 | 264.5345264 | 264.2304192 | 261.2528824 |
| 264.554232 | 264.5568688 | 264.5290528 | 264.541136 | 264.5295264 | 264.2304192 | 261.2498824 |
| 264.554232 | 264.5568688 | 264.5290528 | 264.539136 | 264.5335264 | 264.2264192 | 261.2498824 |
| 264.550232 | 264.5558688 | 264.5290528 | 264.538136 | 264.5305264 | 264.2264192 | 261.2488824 |
| 264.546232 | 264.5528688 | 264.5260528 | 264.535136 | 264.5285264 | 264.2254192 | 261.2438824 |
| 264.548232 | 264.5528688 | 264.5280528 | 264.535136 | 264.5275264 | 264.2224192 | 261.2438824 |
| 264.548232 | 264.5528688 | 264.5280528 | 264.536136 | 264.5275264 | 264.2234192 | 261.2458824 |
| 264.545232 | 264.5498688 | 264.5270528 | 264.534136 | 264.5245264 | 264.2214192 | 261.2398824 |
| 264.547232 | 264.5518688 | 264.5270528 | 264.532136 | 264.5245264 | 264.2234192 | 261.2448824 |
| 264.544232 | 264.5488688 | 264.5240528 | 264.531136 | 264.5215264 | 264.2214192 | 261.2418824 |
| 264.544232 | 264.5478688 | 264.5260528 | 264.531136 | 264.5235264 | 264.2184192 | 261.2418824 |
| 264.543232 | 264.5458688 | 264.5230528 | 264.530136 | 264.5225264 | 264.2174192 | 261.2368824 |
| 264.541232 | 264.5448688 | 264.5230528 | 264.528136 | 264.5195264 | 264.2174192 | 261.2378824 |
| 264.541232 | 264.5458688 | 264.5250528 | 264.528136 | 264.5205264 | 264.2174192 | 261.2378824 |
| 264.538232 | 264.5438688 | 264.5220528 | 264.527136 | 264.5185264 | 264.2164192 | 261.2368824 |
| 264.541232 | 264.5478688 | 264.5250528 | 264.528136 | 264.5205264 | 264.2194192 | 261.2378824 |
| 264.540232 | 264.5448688 | 264.5260528 | 264.527136 | 264.5195264 | 264.2174192 | 261.2378824 |
| 264.540232 | 264.5428688 | 264.5260528 | 264.525136 | 264.5195264 | 264.2164192 | 261.2358824 |
| 264.538232 | 264.5418688 | 264.5240528 | 264.525136 | 264.5185264 | 264.2134192 | 261.2328824 |
| 264.539232 | 264.5438688 | 264.5240528 | 264.526136 | 264.5185264 | 264.2134192 | 261.2328824 |
| 264.537232 | 264.5418688 | 264.5240528 | 264.524136 | 264.5145264 | 264.2134192 | 261.2328824 |
| 264.532232 | 264.5388688 | 264.5210528 | 264.521136 | 264.5135264 | 264.2124192 | 261.2298824 |
| 264.537232 | 264.5408688 | 264.5230528 | 264.524136 | 264.5155264 | 264.2124192 | 261.2318824 |
| 264.535232 | 264.5418688 | 264.5250528 | 264.524136 | 264.5155264 | 264.2134192 | 261.2318824 |
| 264.535232 | 264.5408688 | 264.5230528 | 264.521136 | 264.5155264 | 264.2154192 | 261.2318824 |
| 264.537232 | 264.5408688 | 264.5210528 | 264.523136 | 264.5135264 | 264.2134192 | 261.2338824 |
| 264.535232 | 264.5408688 | 264.5210528 | 264.524136 | 264.5155264 | 264.2134192 | 261.2318824 |
| 264.533232 | 264.5378688 | 264.5220528 | 264.520136 | 264.5105264 | 264.2114192 | 261.2288824 |
| 264.534232 | 264.5388688 | 264.5220528 | 264.521136 | 264.5125264 | 264.2124192 | 261.2288824 |
| 264.534232 | 264.5388688 | 264.5220528 | 264.520136 | 264.5125264 | 264.2144192 | 261.2278824 |
| 264.533232 | 264.5378688 | 264.5220528 | 264.522136 | 264.5125264 | 264.2114192 | 261.2278824 |
| 264.536232 | 264.5398688 | 264.5220528 | 264.520136 | 264.5125264 | 264.2124192 | 261.2278824 |
| 264.533232 | 264.5378688 | 264.5210528 | 264.522136 | 264.5115264 | 264.2114192 | 261.2278824 |
| 264.532232 | 264.5368688 | 264.5200528 | 264.519136 | 264.5115264 | 264.2084192 | 261.2248824 |
| 264.532232 | 264.5388688 | 264.5200528 | 264.519136 | 264.5105264 | 264.2124192 | 261.2248824 |
| 264.531232 | 264.5368688 | 264.5200528 | 264.519136 | 264.5105264 | 264.2094192 | 261.2238824 |
| 264.532232 | 264.5358688 | 264.5180528 | 264.519136 | 264.5105264 | 264.2094192 | 261.2238824 |
| 264.531232 | 264.5368688 | 264.5190528 | 264.519136 | 264.5105264 | 264.2114192 | 261.2238824 |
| 264.532232 | 264.5348688 | 264.5200528 | 264.519136 | 264.5105264 | 264.2144192 | 261.2218824 |

|            |             |             |            |             |             |             |
|------------|-------------|-------------|------------|-------------|-------------|-------------|
| 264.531232 | 264.5358688 | 264.5180528 | 264.518136 | 264.5105264 | 264.2104192 | 261.2198824 |
| 264.531232 | 264.5348688 | 264.5170528 | 264.518136 | 264.5105264 | 264.2114192 | 261.2208824 |
| 264.531232 | 264.5368688 | 264.5170528 | 264.519136 | 264.5105264 | 264.2114192 | 261.2208824 |
| 264.529232 | 264.5358688 | 264.5190528 | 264.518136 | 264.5105264 | 264.2134192 | 261.2188824 |
| 264.531232 | 264.5348688 | 264.5190528 | 264.518136 | 264.5085264 | 264.2114192 | 261.2188824 |
| 264.533232 | 264.5358688 | 264.5190528 | 264.518136 | 264.5105264 | 264.2144192 | 261.2208824 |
| 264.533232 | 264.5358688 | 264.5190528 | 264.521136 | 264.5125264 | 264.2144192 | 261.2218824 |
| 264.532232 | 264.5358688 | 264.5190528 | 264.518136 | 264.5105264 | 264.2114192 | 261.2208824 |
| 264.532232 | 264.5358688 | 264.5180528 | 264.518136 | 264.5115264 | 264.2134192 | 261.2208824 |
| 264.530232 | 264.5358688 | 264.5160528 | 264.517136 | 264.5095264 | 264.2104192 | 261.2208824 |
| 264.533232 | 264.5348688 | 264.5170528 | 264.519136 | 264.5105264 | 264.2144192 | 261.2178824 |
| 264.531232 | 264.5328688 | 264.5150528 | 264.517136 | 264.5105264 | 264.2124192 | 261.2198824 |
| 264.531232 | 264.5358688 | 264.5170528 | 264.519136 | 264.5105264 | 264.2114192 | 261.2198824 |
| 264.531232 | 264.5358688 | 264.5170528 | 264.521136 | 264.5105264 | 264.2154192 | 261.2218824 |
| 264.536232 | 264.5358688 | 264.5200528 | 264.522136 | 264.5115264 | 264.2184192 | 261.2218824 |
| 264.532232 | 264.5328688 | 264.5170528 | 264.519136 | 264.5105264 | 264.2114192 | 261.2188824 |
| 264.532232 | 264.5328688 | 264.5160528 | 264.519136 | 264.5095264 | 264.2134192 | 261.2188824 |
| 264.530232 | 264.5328688 | 264.5140528 | 264.518136 | 264.5095264 | 264.2124192 | 261.2188824 |
| 264.532232 | 264.5348688 | 264.5160528 | 264.519136 | 264.5095264 | 264.2134192 | 261.2188824 |
| 264.530232 | 264.5328688 | 264.5140528 | 264.519136 | 264.5095264 | 264.2154192 | 261.2198824 |
| 264.531232 | 264.5348688 | 264.5170528 | 264.519136 | 264.5105264 | 264.2134192 | 261.2188824 |
| 264.531232 | 264.5348688 | 264.5180528 | 264.519136 | 264.5115264 | 264.2124192 | 261.2218824 |
| 264.531232 | 264.5328688 | 264.5130528 | 264.517136 | 264.5085264 | 264.2114192 | 261.2198824 |
| 264.532232 | 264.5328688 | 264.5140528 | 264.518136 | 264.5095264 | 264.2144192 | 261.2198824 |
| 264.528232 | 264.5318688 | 264.5150528 | 264.514136 | 264.5075264 | 264.2094192 | 261.2188824 |
| 264.530232 | 264.5318688 | 264.5150528 | 264.516136 | 264.5075264 | 264.2114192 | 261.2188824 |
| 264.526232 | 264.5288688 | 264.5140528 | 264.513136 | 264.5045264 | 264.2084192 | 261.2188824 |
| 264.528232 | 264.5298688 | 264.5130528 | 264.513136 | 264.5055264 | 264.2094192 | 261.2188824 |
| 264.530232 | 264.5308688 | 264.5180528 | 264.515136 | 264.5065264 | 264.2124192 | 261.2198824 |
| 264.524232 | 264.5278688 | 264.5130528 | 264.509136 | 264.5025264 | 264.2074192 | 261.2168824 |
| 264.524232 | 264.5278688 | 264.5150528 | 264.511136 | 264.5015264 | 264.2094192 | 261.2178824 |
| 264.525232 | 264.5298688 | 264.5160528 | 264.512136 | 264.5025264 | 264.2064192 | 261.2198824 |
| 264.523232 | 264.5278688 | 264.5140528 | 264.509136 | 264.5015264 | 264.2054192 | 261.2198824 |
| 264.521232 | 264.5218688 | 264.5120528 | 264.506136 | 264.4965264 | 264.1984192 | 261.2138824 |
| 264.518232 | 264.5228688 | 264.5130528 | 264.505136 | 264.4975264 | 264.2014192 | 261.2178824 |
| 264.519232 | 264.5228688 | 264.5140528 | 264.507136 | 264.4975264 | 264.1994192 | 261.2178824 |
| 264.520232 | 264.5228688 | 264.5150528 | 264.507136 | 264.5005264 | 264.2004192 | 261.2188824 |
| 264.517232 | 264.5208688 | 264.5120528 | 264.503136 | 264.4955264 | 264.1954192 | 261.2178824 |
| 264.517232 | 264.5208688 | 264.5130528 | 264.502136 | 264.4955264 | 264.1964192 | 261.2178824 |
| 264.515232 | 264.5198688 | 264.5150528 | 264.503136 | 264.4955264 | 264.1954192 | 261.2178824 |
| 264.515232 | 264.5198688 | 264.5150528 | 264.500136 | 264.4955264 | 264.1954192 | 261.2158824 |
| 264.512232 | 264.5178688 | 264.5120528 | 264.499136 | 264.4905264 | 264.1954192 | 261.2158824 |
| 264.513232 | 264.5178688 | 264.5130528 | 264.498136 | 264.4895264 | 264.1934192 | 261.2158824 |
| 264.513232 | 264.5178688 | 264.5090528 | 264.497136 | 264.4915264 | 264.1894192 | 261.2138824 |
| 264.511232 | 264.5158688 | 264.5110528 | 264.498136 | 264.4895264 | 264.1894192 | 261.2138824 |
| 264.509232 | 264.5148688 | 264.5080528 | 264.493136 | 264.4865264 | 264.1874192 | 261.2118824 |
| 264.508232 | 264.5128688 | 264.5080528 | 264.494136 | 264.4865264 | 264.1864192 | 261.2108824 |

|            |             |             |            |             |             |             |
|------------|-------------|-------------|------------|-------------|-------------|-------------|
| 264.506232 | 264.5118688 | 264.5070528 | 264.492136 | 264.4855264 | 264.1884192 | 261.2098824 |
| 264.507232 | 264.5128688 | 264.5080528 | 264.493136 | 264.4825264 | 264.1874192 | 261.2108824 |
| 264.505232 | 264.5118688 | 264.5080528 | 264.492136 | 264.4825264 | 264.1854192 | 261.2108824 |
| 264.504232 | 264.5098688 | 264.5060528 | 264.489136 | 264.4815264 | 264.1864192 | 261.2088824 |
| 264.503232 | 264.5088688 | 264.5050528 | 264.487136 | 264.4785264 | 264.1844192 | 261.2058824 |
| 264.501232 | 264.5088688 | 264.5050528 | 264.487136 | 264.4785264 | 264.1824192 | 261.2058824 |
| 264.504232 | 264.5088688 | 264.5060528 | 264.487136 | 264.4795264 | 264.1804192 | 261.2088824 |
| 264.502232 | 264.5088688 | 264.5060528 | 264.487136 | 264.4785264 | 264.1844192 | 261.2088824 |
| 264.503232 | 264.5068688 | 264.5050528 | 264.486136 | 264.4785264 | 264.1824192 | 261.2078824 |
| 264.500232 | 264.5078688 | 264.5040528 | 264.486136 | 264.4765264 | 264.1814192 | 261.2068824 |
| 264.498232 | 264.5028688 | 264.5020528 | 264.484136 | 264.4755264 | 264.1764192 | 261.2048824 |
| 264.499232 | 264.5028688 | 264.5040528 | 264.485136 | 264.4755264 | 264.1804192 | 261.2038824 |
| 264.497232 | 264.5048688 | 264.5040528 | 264.483136 | 264.4745264 | 264.1804192 | 261.2038824 |
| 264.497232 | 264.5028688 | 264.5010528 | 264.483136 | 264.4725264 | 264.1794192 | 261.2028824 |
| 264.499232 | 264.5048688 | 264.5020528 | 264.485136 | 264.4745264 | 264.1844192 | 261.2038824 |
| 264.496232 | 264.5018688 | 264.5000528 | 264.482136 | 264.4735264 | 264.1784192 | 261.2028824 |
| 264.497232 | 264.5018688 | 264.5020528 | 264.481136 | 264.4735264 | 264.1784192 | 261.2018824 |
| 264.494232 | 264.5008688 | 264.5010528 | 264.481136 | 264.4725264 | 264.1734192 | 261.1998824 |
| 264.494232 | 264.5008688 | 264.4990528 | 264.481136 | 264.4705264 | 264.1754192 | 261.1988824 |
| 264.497232 | 264.5038688 | 264.4990528 | 264.481136 | 264.4725264 | 264.1794192 | 261.1998824 |
| 264.496232 | 264.4998688 | 264.5000528 | 264.480136 | 264.4715264 | 264.1794192 | 261.1968824 |
| 264.494232 | 264.4988688 | 264.4970528 | 264.479136 | 264.4705264 | 264.1754192 | 261.1958824 |
| 264.495232 | 264.4978688 | 264.5010528 | 264.480136 | 264.4715264 | 264.1804192 | 261.1978824 |
| 264.498232 | 264.5008688 | 264.4980528 | 264.483136 | 264.4735264 | 264.1824192 | 261.1978824 |
| 264.499232 | 264.5018688 | 264.4990528 | 264.483136 | 264.4735264 | 264.1824192 | 261.1978824 |
| 264.499232 | 264.5028688 | 264.5010528 | 264.485136 | 264.4755264 | 264.1844192 | 261.1958824 |
| 264.499232 | 264.5038688 | 264.4980528 | 264.486136 | 264.4755264 | 264.1854192 | 261.1968824 |
| 264.502232 | 264.5048688 | 264.5000528 | 264.487136 | 264.4775264 | 264.1854192 | 261.1948824 |
| 264.502232 | 264.5068688 | 264.4980528 | 264.489136 | 264.4785264 | 264.1874192 | 261.1938824 |
| 264.506232 | 264.5088688 | 264.4980528 | 264.493136 | 264.4835264 | 264.1934192 | 261.1948824 |
| 264.506232 | 264.5088688 | 264.4970528 | 264.491136 | 264.4815264 | 264.1934192 | 261.1918824 |
| 264.506232 | 264.5088688 | 264.4970528 | 264.493136 | 264.4855264 | 264.1964192 | 261.1918824 |
| 264.506232 | 264.5088688 | 264.4970528 | 264.494136 | 264.4835264 | 264.1964192 | 261.1918824 |
| 264.506232 | 264.5088688 | 264.4970528 | 264.493136 | 264.4825264 | 264.1994192 | 261.1928824 |
| 264.510232 | 264.5118688 | 264.4990528 | 264.498136 | 264.4865264 | 264.1984192 | 261.1948824 |
| 264.508232 | 264.5098688 | 264.4970528 | 264.496136 | 264.4875264 | 264.1974192 | 261.1928824 |
| 264.506232 | 264.5118688 | 264.4970528 | 264.494136 | 264.4835264 | 264.1994192 | 261.1938824 |
| 264.505232 | 264.5098688 | 264.4970528 | 264.493136 | 264.4825264 | 264.1974192 | 261.1928824 |
| 264.506232 | 264.5118688 | 264.4990528 | 264.496136 | 264.4875264 | 264.1994192 | 261.1938824 |
| 264.505232 | 264.5098688 | 264.4970528 | 264.494136 | 264.4855264 | 264.1974192 | 261.1938824 |
| 264.506232 | 264.5098688 | 264.4970528 | 264.494136 | 264.4835264 | 264.1954192 | 261.1958824 |
| 264.505232 | 264.5088688 | 264.4980528 | 264.492136 | 264.4825264 | 264.1964192 | 261.1958824 |
| 264.505232 | 264.5088688 | 264.4960528 | 264.493136 | 264.4835264 | 264.1934192 | 261.1958824 |
| 264.503232 | 264.5088688 | 264.4970528 | 264.493136 | 264.4805264 | 264.1934192 | 261.1958824 |
| 264.504232 | 264.5098688 | 264.4970528 | 264.493136 | 264.4835264 | 264.1954192 | 261.1988824 |
| 264.503232 | 264.5088688 | 264.4970528 | 264.490136 | 264.4825264 | 264.1934192 | 261.1988824 |
| 264.501232 | 264.5068688 | 264.4970528 | 264.488136 | 264.4805264 | 264.1904192 | 261.1968824 |

|            |             |             |            |             |             |             |
|------------|-------------|-------------|------------|-------------|-------------|-------------|
| 264.504232 | 264.5088688 | 264.4980528 | 264.493136 | 264.4815264 | 264.1934192 | 261.1998824 |
| 264.502232 | 264.5068688 | 264.4980528 | 264.489136 | 264.4815264 | 264.1894192 | 261.1998824 |
| 264.501232 | 264.5068688 | 264.4990528 | 264.490136 | 264.4825264 | 264.1904192 | 261.1998824 |
| 264.501232 | 264.5068688 | 264.4960528 | 264.489136 | 264.4795264 | 264.1884192 | 261.1998824 |
| 264.498232 | 264.5038688 | 264.4950528 | 264.486136 | 264.4775264 | 264.1874192 | 261.1978824 |
| 264.496232 | 264.5018688 | 264.4960528 | 264.486136 | 264.4765264 | 264.1854192 | 261.1978824 |
| 264.498232 | 264.5038688 | 264.4980528 | 264.486136 | 264.4755264 | 264.1884192 | 261.1978824 |
| 264.498232 | 264.5018688 | 264.4980528 | 264.486136 | 264.4755264 | 264.1854192 | 261.1978824 |
| 264.496232 | 264.5038688 | 264.4980528 | 264.486136 | 264.4755264 | 264.1834192 | 261.1978824 |
| 264.496232 | 264.5018688 | 264.4940528 | 264.482136 | 264.4755264 | 264.1834192 | 261.1958824 |
| 264.497232 | 264.5018688 | 264.4960528 | 264.484136 | 264.4775264 | 264.1864192 | 261.1978824 |
| 264.496232 | 264.4998688 | 264.4960528 | 264.484136 | 264.4755264 | 264.1854192 | 261.1958824 |
| 264.496232 | 264.5018688 | 264.4940528 | 264.482136 | 264.4755264 | 264.1834192 | 261.1958824 |
| 264.494232 | 264.4988688 | 264.4940528 | 264.481136 | 264.4725264 | 264.1834192 | 261.1978824 |
| 264.494232 | 264.4998688 | 264.4960528 | 264.484136 | 264.4735264 | 264.1844192 | 261.1958824 |
| 264.494232 | 264.4998688 | 264.4940528 | 264.480136 | 264.4735264 | 264.1824192 | 261.1958824 |
| 264.492232 | 264.4988688 | 264.4940528 | 264.481136 | 264.4725264 | 264.1794192 | 261.1958824 |
| 264.492232 | 264.4988688 | 264.4920528 | 264.479136 | 264.4725264 | 264.1794192 | 261.1928824 |
| 264.492232 | 264.4988688 | 264.4920528 | 264.479136 | 264.4725264 | 264.1814192 | 261.1928824 |
| 264.494232 | 264.4998688 | 264.4940528 | 264.480136 | 264.4735264 | 264.1814192 | 261.1958824 |
| 264.494232 | 264.4988688 | 264.4920528 | 264.479136 | 264.4725264 | 264.1814192 | 261.1928824 |
| 264.492232 | 264.4968688 | 264.4940528 | 264.479136 | 264.4725264 | 264.1814192 | 261.1928824 |
| 264.492232 | 264.4988688 | 264.4940528 | 264.479136 | 264.4725264 | 264.1814192 | 261.1948824 |
| 264.490232 | 264.4988688 | 264.4940528 | 264.479136 | 264.4725264 | 264.1794192 | 261.1928824 |
| 264.492232 | 264.4968688 | 264.4940528 | 264.475136 | 264.4685264 | 264.1814192 | 261.1948824 |
| 264.494232 | 264.4968688 | 264.4940528 | 264.477136 | 264.4685264 | 264.1794192 | 261.1928824 |
| 264.490232 | 264.4968688 | 264.4920528 | 264.477136 | 264.4665264 | 264.1814192 | 261.1908824 |
| 264.489232 | 264.4928688 | 264.4910528 | 264.474136 | 264.4655264 | 264.1764192 | 261.1918824 |
| 264.488232 | 264.4928688 | 264.4900528 | 264.473136 | 264.4665264 | 264.1734192 | 261.1898824 |
| 264.488232 | 264.4908688 | 264.4900528 | 264.474136 | 264.4645264 | 264.1764192 | 261.1918824 |
| 264.489232 | 264.4938688 | 264.4910528 | 264.474136 | 264.4655264 | 264.1784192 | 261.1928824 |
| 264.488232 | 264.4928688 | 264.4910528 | 264.473136 | 264.4645264 | 264.1754192 | 261.1918824 |
| 264.488232 | 264.4928688 | 264.4910528 | 264.473136 | 264.4665264 | 264.1764192 | 261.1918824 |
| 264.489232 | 264.4938688 | 264.4910528 | 264.474136 | 264.4675264 | 264.1764192 | 261.1928824 |
| 264.486232 | 264.4908688 | 264.4910528 | 264.473136 | 264.4645264 | 264.1734192 | 261.1898824 |
| 264.486232 | 264.4928688 | 264.4910528 | 264.473136 | 264.4645264 | 264.1764192 | 261.1918824 |
| 264.483232 | 264.4888688 | 264.4870528 | 264.470136 | 264.4615264 | 264.1704192 | 261.1878824 |
| 264.483232 | 264.4888688 | 264.4870528 | 264.470136 | 264.4615264 | 264.1724192 | 261.1878824 |
| 264.487232 | 264.4918688 | 264.4890528 | 264.473136 | 264.4635264 | 264.1734192 | 261.1908824 |
| 264.487232 | 264.4898688 | 264.4900528 | 264.471136 | 264.4655264 | 264.1734192 | 261.1908824 |
| 264.485232 | 264.4888688 | 264.4890528 | 264.470136 | 264.4615264 | 264.1704192 | 261.1878824 |
| 264.487232 | 264.4898688 | 264.4890528 | 264.473136 | 264.4635264 | 264.1764192 | 261.1908824 |
| 264.485232 | 264.4898688 | 264.4870528 | 264.472136 | 264.4635264 | 264.1744192 | 261.1898824 |
| 264.485232 | 264.4898688 | 264.4870528 | 264.473136 | 264.4655264 | 264.1754192 | 261.1878824 |
| 264.485232 | 264.4898688 | 264.4880528 | 264.471136 | 264.4655264 | 264.1754192 | 261.1878824 |
| 264.485232 | 264.4888688 | 264.4870528 | 264.473136 | 264.4655264 | 264.1754192 | 261.1878824 |
| 264.486232 | 264.4908688 | 264.4880528 | 264.473136 | 264.4665264 | 264.1774192 | 261.1868824 |

|            |             |             |            |             |             |             |
|------------|-------------|-------------|------------|-------------|-------------|-------------|
| 264.488232 | 264.4898688 | 264.4840528 | 264.473136 | 264.4665264 | 264.1774192 | 261.1868824 |
| 264.486232 | 264.4918688 | 264.4880528 | 264.475136 | 264.4665264 | 264.1784192 | 261.1868824 |
| 264.486232 | 264.4888688 | 264.4850528 | 264.471136 | 264.4635264 | 264.1754192 | 261.1838824 |
| 264.488232 | 264.4898688 | 264.4860528 | 264.475136 | 264.4665264 | 264.1784192 | 261.1858824 |
| 264.484232 | 264.4898688 | 264.4880528 | 264.473136 | 264.4635264 | 264.1784192 | 261.1868824 |
| 264.489232 | 264.4928688 | 264.4890528 | 264.477136 | 264.4695264 | 264.1774192 | 261.1888824 |
| 264.487232 | 264.4908688 | 264.4840528 | 264.474136 | 264.4665264 | 264.1804192 | 261.1858824 |
| 264.487232 | 264.4908688 | 264.4860528 | 264.476136 | 264.4645264 | 264.1784192 | 261.1868824 |
| 264.489232 | 264.4928688 | 264.4870528 | 264.476136 | 264.4665264 | 264.1804192 | 261.1868824 |
| 264.489232 | 264.4908688 | 264.4860528 | 264.476136 | 264.4675264 | 264.1814192 | 261.1868824 |
| 264.489232 | 264.4908688 | 264.4870528 | 264.474136 | 264.4675264 | 264.1804192 | 261.1868824 |
| 264.491232 | 264.4928688 | 264.4840528 | 264.476136 | 264.4675264 | 264.1814192 | 261.1868824 |
| 264.490232 | 264.4928688 | 264.4870528 | 264.477136 | 264.4695264 | 264.1854192 | 261.1868824 |
| 264.489232 | 264.4908688 | 264.4840528 | 264.474136 | 264.4665264 | 264.1814192 | 261.1838824 |
| 264.489232 | 264.4928688 | 264.4850528 | 264.476136 | 264.4675264 | 264.1814192 | 261.1848824 |
| 264.488232 | 264.4908688 | 264.4870528 | 264.475136 | 264.4685264 | 264.1824192 | 261.1868824 |
| 264.490232 | 264.4908688 | 264.4850528 | 264.475136 | 264.4675264 | 264.1844192 | 261.1848824 |
| 264.489232 | 264.4938688 | 264.4850528 | 264.477136 | 264.4685264 | 264.1844192 | 261.1858824 |
| 264.489232 | 264.4918688 | 264.4860528 | 264.475136 | 264.4665264 | 264.1824192 | 261.1858824 |
| 264.489232 | 264.4918688 | 264.4860528 | 264.475136 | 264.4655264 | 264.1844192 | 261.1848824 |
| 264.489232 | 264.4908688 | 264.4860528 | 264.477136 | 264.4685264 | 264.1804192 | 261.1858824 |
| 264.489232 | 264.4918688 | 264.4860528 | 264.477136 | 264.4685264 | 264.1804192 | 261.1858824 |
| 264.489232 | 264.4938688 | 264.4880528 | 264.477136 | 264.4665264 | 264.1804192 | 261.1878824 |
| 264.486232 | 264.4908688 | 264.4830528 | 264.475136 | 264.4635264 | 264.1784192 | 261.1848824 |
| 264.486232 | 264.4908688 | 264.4850528 | 264.472136 | 264.4635264 | 264.1804192 | 261.1858824 |
| 264.486232 | 264.4888688 | 264.4850528 | 264.472136 | 264.4615264 | 264.1804192 | 261.1848824 |
| 264.486232 | 264.4918688 | 264.4850528 | 264.473136 | 264.4675264 | 264.1814192 | 261.1868824 |
| 264.485232 | 264.4898688 | 264.4860528 | 264.473136 | 264.4645264 | 264.1794192 | 261.1878824 |
| 264.484232 | 264.4868688 | 264.4860528 | 264.470136 | 264.4635264 | 264.1784192 | 261.1878824 |
| 264.485232 | 264.4888688 | 264.4840528 | 264.472136 | 264.4645264 | 264.1744192 | 261.1858824 |
| 264.483232 | 264.4868688 | 264.4840528 | 264.468136 | 264.4615264 | 264.1764192 | 261.1858824 |
| 264.485232 | 264.4868688 | 264.4840528 | 264.470136 | 264.4625264 | 264.1724192 | 261.1868824 |
| 264.483232 | 264.4888688 | 264.4850528 | 264.466136 | 264.4605264 | 264.1734192 | 261.1868824 |
| 264.481232 | 264.4848688 | 264.4810528 | 264.466136 | 264.4565264 | 264.1734192 | 261.1858824 |
| 264.480232 | 264.4848688 | 264.4830528 | 264.466136 | 264.4585264 | 264.1734192 | 261.1848824 |
| 264.478232 | 264.4848688 | 264.4820528 | 264.464136 | 264.4565264 | 264.1744192 | 261.1868824 |
| 264.478232 | 264.4828688 | 264.4820528 | 264.463136 | 264.4565264 | 264.1694192 | 261.1868824 |
| 264.476232 | 264.4818688 | 264.4820528 | 264.462136 | 264.4555264 | 264.1684192 | 261.1868824 |
| 264.474232 | 264.4798688 | 264.4820528 | 264.461136 | 264.4545264 | 264.1674192 | 261.1868824 |
| 264.476232 | 264.4818688 | 264.4800528 | 264.461136 | 264.4525264 | 264.1684192 | 261.1868824 |
| 264.474232 | 264.4798688 | 264.4820528 | 264.461136 | 264.4525264 | 264.1654192 | 261.1848824 |
| 264.473232 | 264.4788688 | 264.4820528 | 264.461136 | 264.4525264 | 264.1654192 | 261.1848824 |
| 264.471232 | 264.4788688 | 264.4810528 | 264.456136 | 264.4515264 | 264.1634192 | 261.1868824 |
| 264.470232 | 264.4788688 | 264.4800528 | 264.458136 | 264.4505264 | 264.1634192 | 261.1848824 |
| 264.472232 | 264.4788688 | 264.4820528 | 264.457136 | 264.4485264 | 264.1634192 | 261.1858824 |
| 264.468232 | 264.4768688 | 264.4780528 | 264.454136 | 264.4475264 | 264.1594192 | 261.1848824 |
| 264.470232 | 264.4748688 | 264.4780528 | 264.455136 | 264.4465264 | 264.1594192 | 261.1828824 |



|            |             |             |            |             |             |             |
|------------|-------------|-------------|------------|-------------|-------------|-------------|
| 264.469232 | 264.4758688 | 264.4780528 | 264.454136 | 264.4465264 | 264.1604192 | 261.1858824 |
| 264.467232 | 264.4748688 | 264.4810528 | 264.453136 | 264.4445264 | 264.1624192 | 261.1858824 |
| 264.468232 | 264.4748688 | 264.4780528 | 264.453136 | 264.4455264 | 264.1574192 | 261.1848824 |
| 264.467232 | 264.4748688 | 264.4770528 | 264.450136 | 264.4445264 | 264.1594192 | 261.1838824 |
| 264.465232 | 264.4728688 | 264.4770528 | 264.450136 | 264.4405264 | 264.1544192 | 261.1818824 |
| 264.464232 | 264.4708688 | 264.4780528 | 264.450136 | 264.4425264 | 264.1544192 | 261.1838824 |
| 264.464232 | 264.4708688 | 264.4800528 | 264.450136 | 264.4425264 | 264.1544192 | 261.1838824 |
| 264.463232 | 264.4708688 | 264.4760528 | 264.448136 | 264.4405264 | 264.1504192 | 261.1818824 |
| 264.462232 | 264.4698688 | 264.4760528 | 264.448136 | 264.4405264 | 264.1534192 | 261.1828824 |
| 264.464232 | 264.4688688 | 264.4770528 | 264.448136 | 264.4415264 | 264.1514192 | 261.1828824 |
| 264.460232 | 264.4678688 | 264.4740528 | 264.448136 | 264.4395264 | 264.1514192 | 261.1798824 |
| 264.460232 | 264.4678688 | 264.4740528 | 264.446136 | 264.4375264 | 264.1494192 | 261.1798824 |
| 264.459232 | 264.4668688 | 264.4750528 | 264.446136 | 264.4375264 | 264.1484192 | 261.1798824 |
| 264.456232 | 264.4658688 | 264.4720528 | 264.443136 | 264.4355264 | 264.1494192 | 261.1758824 |
| 264.458232 | 264.4668688 | 264.4740528 | 264.445136 | 264.4365264 | 264.1484192 | 261.1778824 |
| 264.460232 | 264.4648688 | 264.4740528 | 264.445136 | 264.4365264 | 264.1514192 | 261.1768824 |
| 264.459232 | 264.4648688 | 264.4720528 | 264.443136 | 264.4345264 | 264.1474192 | 261.1738824 |
| 264.459232 | 264.4658688 | 264.4710528 | 264.446136 | 264.4355264 | 264.1504192 | 261.1778824 |
| 264.459232 | 264.4648688 | 264.4710528 | 264.446136 | 264.4335264 | 264.1504192 | 261.1768824 |
| 264.460232 | 264.4658688 | 264.4720528 | 264.446136 | 264.4355264 | 264.1494192 | 261.1748824 |
| 264.456232 | 264.4648688 | 264.4710528 | 264.446136 | 264.4355264 | 264.1494192 | 261.1748824 |
| 264.460232 | 264.4658688 | 264.4700528 | 264.445136 | 264.4345264 | 264.1524192 | 261.1748824 |
| 264.460232 | 264.4658688 | 264.4720528 | 264.447136 | 264.4365264 | 264.1494192 | 261.1748824 |
| 264.458232 | 264.4638688 | 264.4700528 | 264.445136 | 264.4365264 | 264.1544192 | 261.1728824 |
| 264.456232 | 264.4628688 | 264.4670528 | 264.444136 | 264.4335264 | 264.1494192 | 261.1698824 |
| 264.458232 | 264.4638688 | 264.4690528 | 264.444136 | 264.4345264 | 264.1524192 | 261.1728824 |
| 264.461232 | 264.4658688 | 264.4700528 | 264.447136 | 264.4385264 | 264.1524192 | 261.1728824 |
| 264.458232 | 264.4638688 | 264.4690528 | 264.447136 | 264.4365264 | 264.1544192 | 261.1728824 |
| 264.464232 | 264.4668688 | 264.4690528 | 264.450136 | 264.4415264 | 264.1574192 | 261.1738824 |
| 264.465232 | 264.4678688 | 264.4700528 | 264.451136 | 264.4415264 | 264.1594192 | 261.1718824 |
| 264.461232 | 264.4658688 | 264.4700528 | 264.446136 | 264.4385264 | 264.1594192 | 261.1728824 |
| 264.459232 | 264.4648688 | 264.4660528 | 264.446136 | 264.4365264 | 264.1574192 | 261.1698824 |
| 264.460232 | 264.4628688 | 264.4680528 | 264.445136 | 264.4365264 | 264.1584192 | 261.1708824 |
| 264.457232 | 264.4608688 | 264.4680528 | 264.444136 | 264.4345264 | 264.1574192 | 261.1698824 |
| 264.457232 | 264.4638688 | 264.4670528 | 264.446136 | 264.4365264 | 264.1554192 | 261.1688824 |
| 264.460232 | 264.4648688 | 264.4670528 | 264.447136 | 264.4395264 | 264.1584192 | 261.1678824 |
| 264.461232 | 264.4628688 | 264.4680528 | 264.447136 | 264.4385264 | 264.1574192 | 261.1698824 |
| 264.462232 | 264.4658688 | 264.4700528 | 264.450136 | 264.4385264 | 264.1584192 | 261.1688824 |
| 264.460232 | 264.4638688 | 264.4680528 | 264.446136 | 264.4385264 | 264.1564192 | 261.1688824 |
| 264.463232 | 264.4668688 | 264.4690528 | 264.449136 | 264.4405264 | 264.1574192 | 261.1718824 |
| 264.461232 | 264.4648688 | 264.4650528 | 264.448136 | 264.4375264 | 264.1574192 | 261.1688824 |
| 264.460232 | 264.4648688 | 264.4640528 | 264.447136 | 264.4385264 | 264.1584192 | 261.1678824 |
| 264.463232 | 264.4658688 | 264.4670528 | 264.448136 | 264.4375264 | 264.1614192 | 261.1688824 |
| 264.462232 | 264.4658688 | 264.4680528 | 264.449136 | 264.4385264 | 264.1624192 | 261.1688824 |
| 264.456232 | 264.4628688 | 264.4660528 | 264.444136 | 264.4315264 | 264.1584192 | 261.1668824 |
| 264.460232 | 264.4618688 | 264.4660528 | 264.446136 | 264.4355264 | 264.1604192 | 261.1688824 |
| 264.458232 | 264.4628688 | 264.4670528 | 264.443136 | 264.4345264 | 264.1574192 | 261.1688824 |

|            |             |             |            |             |             |             |
|------------|-------------|-------------|------------|-------------|-------------|-------------|
| 264.459232 | 264.4618688 | 264.4660528 | 264.444136 | 264.4365264 | 264.1574192 | 261.1688824 |
| 264.453232 | 264.4608688 | 264.4630528 | 264.442136 | 264.4295264 | 264.1574192 | 261.1678824 |
| 264.457232 | 264.4638688 | 264.4670528 | 264.444136 | 264.4355264 | 264.1554192 | 261.1708824 |
| 264.456232 | 264.4618688 | 264.4660528 | 264.443136 | 264.4325264 | 264.1544192 | 261.1688824 |
| 264.456232 | 264.4628688 | 264.4670528 | 264.443136 | 264.4335264 | 264.1544192 | 261.1678824 |
| 264.457232 | 264.4628688 | 264.4670528 | 264.444136 | 264.4345264 | 264.1534192 | 261.1688824 |
| 264.455232 | 264.4608688 | 264.4660528 | 264.443136 | 264.4315264 | 264.1534192 | 261.1698824 |
| 264.455232 | 264.4598688 | 264.4660528 | 264.442136 | 264.4315264 | 264.1534192 | 261.1708824 |
| 264.454232 | 264.4608688 | 264.4650528 | 264.441136 | 264.4325264 | 264.1544192 | 261.1718824 |
| 264.455232 | 264.4608688 | 264.4680528 | 264.442136 | 264.4315264 | 264.1554192 | 261.1708824 |
| 264.453232 | 264.4608688 | 264.4660528 | 264.441136 | 264.4285264 | 264.1534192 | 261.1718824 |
| 264.453232 | 264.4608688 | 264.4640528 | 264.442136 | 264.4305264 | 264.1514192 | 261.1728824 |
| 264.453232 | 264.4608688 | 264.4640528 | 264.441136 | 264.4325264 | 264.1534192 | 261.1708824 |
| 264.451232 | 264.4608688 | 264.4640528 | 264.439136 | 264.4285264 | 264.1514192 | 261.1678824 |
| 264.450232 | 264.4578688 | 264.4610528 | 264.437136 | 264.4265264 | 264.1484192 | 261.1668824 |
| 264.452232 | 264.4588688 | 264.4640528 | 264.439136 | 264.4285264 | 264.1524192 | 261.1678824 |
| 264.449232 | 264.4568688 | 264.4630528 | 264.439136 | 264.4295264 | 264.1514192 | 261.1658824 |
| 264.450232 | 264.4568688 | 264.4620528 | 264.434136 | 264.4265264 | 264.1484192 | 261.1668824 |
| 264.450232 | 264.4588688 | 264.4640528 | 264.436136 | 264.4285264 | 264.1484192 | 261.1668824 |
| 264.448232 | 264.4568688 | 264.4620528 | 264.436136 | 264.4265264 | 264.1484192 | 261.1678824 |
| 264.449232 | 264.4548688 | 264.4630528 | 264.434136 | 264.4275264 | 264.1494192 | 261.1678824 |
| 264.446232 | 264.4548688 | 264.4590528 | 264.435136 | 264.4245264 | 264.1444192 | 261.1658824 |
| 264.448232 | 264.4558688 | 264.4620528 | 264.436136 | 264.4265264 | 264.1504192 | 261.1648824 |
| 264.448232 | 264.4548688 | 264.4600528 | 264.433136 | 264.4255264 | 264.1444192 | 261.1638824 |
| 264.445232 | 264.4528688 | 264.4610528 | 264.433136 | 264.4215264 | 264.1464192 | 261.1628824 |
| 264.446232 | 264.4538688 | 264.4600528 | 264.434136 | 264.4255264 | 264.1454192 | 261.1628824 |
| 264.448232 | 264.4558688 | 264.4620528 | 264.434136 | 264.4255264 | 264.1484192 | 261.1658824 |
| 264.446232 | 264.4538688 | 264.4600528 | 264.432136 | 264.4225264 | 264.1474192 | 261.1648824 |
| 264.446232 | 264.4538688 | 264.4600528 | 264.434136 | 264.4245264 | 264.1464192 | 261.1678824 |
| 264.443232 | 264.4528688 | 264.4590528 | 264.434136 | 264.4225264 | 264.1434192 | 261.1628824 |
| 264.446232 | 264.4528688 | 264.4610528 | 264.433136 | 264.4215264 | 264.1464192 | 261.1638824 |
| 264.446232 | 264.4548688 | 264.4620528 | 264.433136 | 264.4215264 | 264.1444192 | 261.1648824 |
| 264.446232 | 264.4528688 | 264.4600528 | 264.433136 | 264.4215264 | 264.1464192 | 261.1638824 |
| 264.446232 | 264.4508688 | 264.4560528 | 264.433136 | 264.4215264 | 264.1464192 | 261.1638824 |
| 264.448232 | 264.4498688 | 264.4600528 | 264.434136 | 264.4215264 | 264.1444192 | 261.1628824 |
| 264.444232 | 264.4508688 | 264.4600528 | 264.432136 | 264.4205264 | 264.1454192 | 261.1658824 |
| 264.442232 | 264.4488688 | 264.4580528 | 264.429136 | 264.4205264 | 264.1414192 | 261.1608824 |
| 264.445232 | 264.4498688 | 264.4570528 | 264.430136 | 264.4195264 | 264.1424192 | 261.1618824 |
| 264.444232 | 264.4498688 | 264.4560528 | 264.429136 | 264.4195264 | 264.1444192 | 261.1628824 |
| 264.445232 | 264.4498688 | 264.4590528 | 264.430136 | 264.4215264 | 264.1454192 | 261.1618824 |
| 264.444232 | 264.4498688 | 264.4580528 | 264.430136 | 264.4195264 | 264.1444192 | 261.1628824 |
| 264.445232 | 264.4518688 | 264.4590528 | 264.432136 | 264.4215264 | 264.1464192 | 261.1628824 |
| 264.444232 | 264.4488688 | 264.4580528 | 264.429136 | 264.4215264 | 264.1424192 | 261.1608824 |
| 264.440232 | 264.4468688 | 264.4540528 | 264.429136 | 264.4155264 | 264.1414192 | 261.1608824 |
| 264.444232 | 264.4488688 | 264.4540528 | 264.429136 | 264.4195264 | 264.1424192 | 261.1608824 |
| 264.444232 | 264.4508688 | 264.4570528 | 264.433136 | 264.4205264 | 264.1444192 | 261.1618824 |
| 264.445232 | 264.4488688 | 264.4560528 | 264.428136 | 264.4175264 | 264.1434192 | 261.1608824 |

|            |             |             |            |             |             |             |
|------------|-------------|-------------|------------|-------------|-------------|-------------|
| 264.442232 | 264.4488688 | 264.4540528 | 264.429136 | 264.4205264 | 264.1444192 | 261.1608824 |
| 264.444232 | 264.4488688 | 264.4560528 | 264.430136 | 264.4215264 | 264.1444192 | 261.1608824 |
| 264.442232 | 264.4488688 | 264.4540528 | 264.427136 | 264.4185264 | 264.1444192 | 261.1588824 |
| 264.443232 | 264.4488688 | 264.4540528 | 264.430136 | 264.4195264 | 264.1424192 | 261.1608824 |
| 264.444232 | 264.4498688 | 264.4560528 | 264.430136 | 264.4195264 | 264.1424192 | 261.1608824 |
| 264.442232 | 264.4488688 | 264.4540528 | 264.429136 | 264.4165264 | 264.1444192 | 261.1578824 |
| 264.443232 | 264.4498688 | 264.4560528 | 264.430136 | 264.4195264 | 264.1454192 | 261.1588824 |
| 264.443232 | 264.4488688 | 264.4520528 | 264.430136 | 264.4175264 | 264.1454192 | 261.1558824 |
| 264.443232 | 264.4488688 | 264.4540528 | 264.428136 | 264.4175264 | 264.1454192 | 261.1588824 |
| 264.442232 | 264.4488688 | 264.4510528 | 264.430136 | 264.4185264 | 264.1444192 | 261.1578824 |
| 264.441232 | 264.4438688 | 264.4510528 | 264.427136 | 264.4155264 | 264.1434192 | 261.1548824 |
| 264.441232 | 264.4478688 | 264.4510528 | 264.429136 | 264.4175264 | 264.1434192 | 261.1578824 |
| 264.440232 | 264.4448688 | 264.4490528 | 264.428136 | 264.4175264 | 264.1434192 | 261.1548824 |
| 264.441232 | 264.4458688 | 264.4520528 | 264.431136 | 264.4195264 | 264.1454192 | 261.1578824 |
| 264.441232 | 264.4458688 | 264.4520528 | 264.431136 | 264.4195264 | 264.1434192 | 261.1578824 |
| 264.442232 | 264.4468688 | 264.4510528 | 264.428136 | 264.4185264 | 264.1444192 | 261.1568824 |
| 264.442232 | 264.4478688 | 264.4510528 | 264.430136 | 264.4205264 | 264.1444192 | 261.1558824 |
| 264.442232 | 264.4468688 | 264.4510528 | 264.428136 | 264.4165264 | 264.1464192 | 261.1568824 |
| 264.441232 | 264.4448688 | 264.4500528 | 264.430136 | 264.4185264 | 264.1454192 | 261.1558824 |
| 264.438232 | 264.4458688 | 264.4490528 | 264.426136 | 264.4155264 | 264.1464192 | 261.1548824 |
| 264.441232 | 264.4488688 | 264.4500528 | 264.429136 | 264.4175264 | 264.1454192 | 261.1578824 |
| 264.440232 | 264.4448688 | 264.4500528 | 264.429136 | 264.4175264 | 264.1434192 | 261.1558824 |
| 264.440232 | 264.4438688 | 264.4490528 | 264.426136 | 264.4175264 | 264.1444192 | 261.1558824 |
| 264.439232 | 264.4438688 | 264.4470528 | 264.426136 | 264.4145264 | 264.1424192 | 261.1548824 |
| 264.440232 | 264.4458688 | 264.4490528 | 264.426136 | 264.4155264 | 264.1444192 | 261.1548824 |
| 264.439232 | 264.4428688 | 264.4470528 | 264.426136 | 264.4165264 | 264.1424192 | 261.1528824 |
| 264.436232 | 264.4408688 | 264.4460528 | 264.425136 | 264.4145264 | 264.1414192 | 261.1538824 |
| 264.439232 | 264.4428688 | 264.4460528 | 264.423136 | 264.4145264 | 264.1414192 | 261.1538824 |
| 264.439232 | 264.4458688 | 264.4480528 | 264.426136 | 264.4165264 | 264.1434192 | 261.1568824 |
| 264.438232 | 264.4458688 | 264.4480528 | 264.426136 | 264.4155264 | 264.1434192 | 261.1538824 |
| 264.438232 | 264.4428688 | 264.4470528 | 264.425136 | 264.4135264 | 264.1404192 | 261.1538824 |
| 264.436232 | 264.4428688 | 264.4470528 | 264.425136 | 264.4155264 | 264.1434192 | 261.1538824 |
| 264.435232 | 264.4418688 | 264.4470528 | 264.422136 | 264.4125264 | 264.1434192 | 261.1528824 |
| 264.436232 | 264.4408688 | 264.4480528 | 264.423136 | 264.4125264 | 264.1394192 | 261.1518824 |
| 264.434232 | 264.4418688 | 264.4460528 | 264.423136 | 264.4115264 | 264.1424192 | 261.1518824 |
| 264.435232 | 264.4418688 | 264.4470528 | 264.423136 | 264.4115264 | 264.1384192 | 261.1518824 |
| 264.435232 | 264.4408688 | 264.4450528 | 264.421136 | 264.4105264 | 264.1394192 | 261.1508824 |
| 264.435232 | 264.4408688 | 264.4470528 | 264.421136 | 264.4105264 | 264.1394192 | 261.1538824 |
| 264.435232 | 264.4398688 | 264.4450528 | 264.421136 | 264.4105264 | 264.1394192 | 261.1548824 |
| 264.432232 | 264.4398688 | 264.4460528 | 264.420136 | 264.4095264 | 264.1394192 | 261.1538824 |
| 264.434232 | 264.4378688 | 264.4440528 | 264.420136 | 264.4075264 | 264.1384192 | 261.1528824 |
| 264.435232 | 264.4408688 | 264.4470528 | 264.421136 | 264.4105264 | 264.1414192 | 261.1568824 |
| 264.432232 | 264.4378688 | 264.4440528 | 264.419136 | 264.4075264 | 264.1374192 | 261.1538824 |
| 264.432232 | 264.4378688 | 264.4440528 | 264.420136 | 264.4095264 | 264.1374192 | 261.1538824 |
| 264.430232 | 264.4378688 | 264.4440528 | 264.419136 | 264.4075264 | 264.1374192 | 261.1518824 |
| 264.430232 | 264.4378688 | 264.4440528 | 264.419136 | 264.4075264 | 264.1364192 | 261.1538824 |
| 264.430232 | 264.4378688 | 264.4460528 | 264.417136 | 264.4055264 | 264.1374192 | 261.1518824 |

|            |             |             |            |             |             |             |
|------------|-------------|-------------|------------|-------------|-------------|-------------|
| 264.430232 | 264.4378688 | 264.4440528 | 264.417136 | 264.4055264 | 264.1364192 | 261.1538824 |
| 264.427232 | 264.4358688 | 264.4430528 | 264.416136 | 264.4035264 | 264.1354192 | 261.1528824 |
| 264.427232 | 264.4388688 | 264.4430528 | 264.418136 | 264.4065264 | 264.1354192 | 261.1548824 |
| 264.428232 | 264.4358688 | 264.4430528 | 264.416136 | 264.4035264 | 264.1344192 | 261.1518824 |
| 264.427232 | 264.4358688 | 264.4430528 | 264.418136 | 264.4045264 | 264.1334192 | 261.1528824 |
| 264.428232 | 264.4358688 | 264.4430528 | 264.416136 | 264.4035264 | 264.1324192 | 261.1518824 |
| 264.424232 | 264.4328688 | 264.4430528 | 264.414136 | 264.4015264 | 264.1294192 | 261.1508824 |
| 264.427232 | 264.4348688 | 264.4410528 | 264.414136 | 264.4015264 | 264.1334192 | 261.1518824 |
| 264.429232 | 264.4348688 | 264.4440528 | 264.415136 | 264.4025264 | 264.1344192 | 261.1538824 |
| 264.427232 | 264.4348688 | 264.4450528 | 264.414136 | 264.4025264 | 264.1314192 | 261.1508824 |
| 264.426232 | 264.4328688 | 264.4420528 | 264.414136 | 264.4035264 | 264.1304192 | 261.1528824 |
| 264.425232 | 264.4298688 | 264.4390528 | 264.411136 | 264.3985264 | 264.1294192 | 261.1498824 |
| 264.426232 | 264.4328688 | 264.4420528 | 264.412136 | 264.4005264 | 264.1304192 | 261.1528824 |
| 264.424232 | 264.4308688 | 264.4390528 | 264.411136 | 264.3975264 | 264.1274192 | 261.1478824 |
| 264.423232 | 264.4308688 | 264.4400528 | 264.410136 | 264.3995264 | 264.1274192 | 261.1488824 |
| 264.423232 | 264.4308688 | 264.4420528 | 264.410136 | 264.3985264 | 264.1274192 | 261.1488824 |
| 264.423232 | 264.4308688 | 264.4420528 | 264.410136 | 264.4005264 | 264.1294192 | 261.1488824 |
| 264.423232 | 264.4328688 | 264.4390528 | 264.412136 | 264.3985264 | 264.1294192 | 261.1508824 |
| 264.420232 | 264.4298688 | 264.4390528 | 264.408136 | 264.3995264 | 264.1264192 | 261.1478824 |
| 264.421232 | 264.4288688 | 264.4400528 | 264.410136 | 264.3995264 | 264.1264192 | 261.1478824 |
| 264.421232 | 264.4298688 | 264.4400528 | 264.406136 | 264.3975264 | 264.1264192 | 261.1498824 |
| 264.419232 | 264.4288688 | 264.4380528 | 264.406136 | 264.3965264 | 264.1254192 | 261.1488824 |
| 264.420232 | 264.4278688 | 264.4390528 | 264.408136 | 264.3965264 | 264.1244192 | 261.1458824 |
| 264.418232 | 264.4278688 | 264.4390528 | 264.405136 | 264.3955264 | 264.1244192 | 261.1468824 |
| 264.419232 | 264.4258688 | 264.4380528 | 264.404136 | 264.3955264 | 264.1234192 | 261.1458824 |
| 264.420232 | 264.4288688 | 264.4390528 | 264.405136 | 264.3965264 | 264.1244192 | 261.1488824 |
| 264.419232 | 264.4268688 | 264.4360528 | 264.408136 | 264.3975264 | 264.1274192 | 261.1478824 |
| 264.419232 | 264.4258688 | 264.4360528 | 264.403136 | 264.3955264 | 264.1244192 | 261.1468824 |
| 264.421232 | 264.4268688 | 264.4380528 | 264.407136 | 264.3955264 | 264.1264192 | 261.1448824 |
| 264.421232 | 264.4268688 | 264.4390528 | 264.408136 | 264.3965264 | 264.1284192 | 261.1488824 |
| 264.418232 | 264.4238688 | 264.4370528 | 264.406136 | 264.3955264 | 264.1264192 | 261.1458824 |
| 264.420232 | 264.4258688 | 264.4370528 | 264.406136 | 264.3965264 | 264.1264192 | 261.1458824 |
| 264.420232 | 264.4258688 | 264.4370528 | 264.406136 | 264.3975264 | 264.1264192 | 261.1478824 |
| 264.420232 | 264.4268688 | 264.4350528 | 264.406136 | 264.3975264 | 264.1254192 | 261.1448824 |
| 264.420232 | 264.4248688 | 264.4370528 | 264.407136 | 264.3995264 | 264.1284192 | 261.1448824 |
| 264.420232 | 264.4278688 | 264.4370528 | 264.407136 | 264.3975264 | 264.1294192 | 261.1468824 |
| 264.420232 | 264.4288688 | 264.4370528 | 264.407136 | 264.3995264 | 264.1324192 | 261.1458824 |
| 264.421232 | 264.4268688 | 264.4340528 | 264.407136 | 264.3965264 | 264.1294192 | 261.1428824 |
| 264.423232 | 264.4288688 | 264.4340528 | 264.409136 | 264.4005264 | 264.1314192 | 261.1448824 |
| 264.422232 | 264.4278688 | 264.4350528 | 264.409136 | 264.3995264 | 264.1294192 | 261.1428824 |
| 264.420232 | 264.4278688 | 264.4350528 | 264.409136 | 264.3995264 | 264.1314192 | 261.1428824 |
| 264.424232 | 264.4278688 | 264.4340528 | 264.411136 | 264.3995264 | 264.1334192 | 261.1448824 |
| 264.425232 | 264.4298688 | 264.4340528 | 264.411136 | 264.4035264 | 264.1324192 | 261.1418824 |
| 264.424232 | 264.4268688 | 264.4330528 | 264.410136 | 264.4015264 | 264.1334192 | 261.1408824 |
| 264.429232 | 264.4308688 | 264.4360528 | 264.415136 | 264.4035264 | 264.1364192 | 261.1438824 |
| 264.427232 | 264.4318688 | 264.4350528 | 264.414136 | 264.4035264 | 264.1384192 | 261.1428824 |
| 264.428232 | 264.4318688 | 264.4330528 | 264.414136 | 264.4045264 | 264.1374192 | 261.1428824 |

|            |             |             |            |             |             |             |
|------------|-------------|-------------|------------|-------------|-------------|-------------|
| 264.430232 | 264.4338688 | 264.4340528 | 264.417136 | 264.4075264 | 264.1414192 | 261.1428824 |
| 264.429232 | 264.4338688 | 264.4330528 | 264.416136 | 264.4065264 | 264.1404192 | 261.1418824 |
| 264.428232 | 264.4328688 | 264.4320528 | 264.416136 | 264.4075264 | 264.1394192 | 261.1408824 |
| 264.428232 | 264.4328688 | 264.4320528 | 264.417136 | 264.4075264 | 264.1394192 | 261.1388824 |
| 264.432232 | 264.4358688 | 264.4340528 | 264.418136 | 264.4095264 | 264.1434192 | 261.1408824 |
| 264.432232 | 264.4358688 | 264.4340528 | 264.419136 | 264.4115264 | 264.1454192 | 261.1408824 |
| 264.434232 | 264.4368688 | 264.4350528 | 264.420136 | 264.4125264 | 264.1464192 | 261.1408824 |
| 264.436232 | 264.4378688 | 264.4340528 | 264.420136 | 264.4115264 | 264.1474192 | 261.1398824 |
| 264.434232 | 264.4358688 | 264.4360528 | 264.421136 | 264.4115264 | 264.1454192 | 261.1408824 |
| 264.434232 | 264.4358688 | 264.4350528 | 264.420136 | 264.4095264 | 264.1464192 | 261.1378824 |
| 264.433232 | 264.4358688 | 264.4330528 | 264.420136 | 264.4095264 | 264.1444192 | 261.1398824 |
| 264.433232 | 264.4358688 | 264.4350528 | 264.424136 | 264.4115264 | 264.1464192 | 261.1408824 |
| 264.434232 | 264.4378688 | 264.4330528 | 264.422136 | 264.4115264 | 264.1444192 | 261.1398824 |
| 264.436232 | 264.4378688 | 264.4340528 | 264.421136 | 264.4115264 | 264.1454192 | 261.1428824 |
| 264.434232 | 264.4378688 | 264.4350528 | 264.420136 | 264.4125264 | 264.1464192 | 261.1408824 |
| 264.434232 | 264.4388688 | 264.4340528 | 264.425136 | 264.4145264 | 264.1454192 | 261.1408824 |
| 264.436232 | 264.4388688 | 264.4350528 | 264.424136 | 264.4125264 | 264.1464192 | 261.1428824 |
| 264.436232 | 264.4408688 | 264.4350528 | 264.423136 | 264.4125264 | 264.1474192 | 261.1448824 |
| 264.437232 | 264.4398688 | 264.4350528 | 264.424136 | 264.4115264 | 264.1484192 | 261.1428824 |
| 264.437232 | 264.4408688 | 264.4350528 | 264.423136 | 264.4135264 | 264.1484192 | 261.1448824 |
| 264.430232 | 264.4378688 | 264.4340528 | 264.421136 | 264.4105264 | 264.1434192 | 261.1418824 |
| 264.434232 | 264.4398688 | 264.4350528 | 264.421136 | 264.4135264 | 264.1444192 | 261.1428824 |
| 264.434232 | 264.4378688 | 264.4360528 | 264.421136 | 264.4105264 | 264.1474192 | 261.1438824 |
| 264.435232 | 264.4368688 | 264.4350528 | 264.418136 | 264.4095264 | 264.1424192 | 261.1438824 |
| 264.431232 | 264.4368688 | 264.4370528 | 264.418136 | 264.4095264 | 264.1444192 | 261.1408824 |
| 264.435232 | 264.4388688 | 264.4360528 | 264.420136 | 264.4095264 | 264.1464192 | 261.1438824 |
| 264.431232 | 264.4368688 | 264.4330528 | 264.421136 | 264.4085264 | 264.1444192 | 261.1438824 |
| 264.433232 | 264.4388688 | 264.4360528 | 264.420136 | 264.4115264 | 264.1424192 | 261.1458824 |
| 264.432232 | 264.4358688 | 264.4340528 | 264.417136 | 264.4085264 | 264.1434192 | 261.1448824 |
| 264.429232 | 264.4328688 | 264.4340528 | 264.417136 | 264.4065264 | 264.1414192 | 261.1458824 |
| 264.429232 | 264.4348688 | 264.4360528 | 264.419136 | 264.4085264 | 264.1424192 | 261.1428824 |
| 264.429232 | 264.4328688 | 264.4360528 | 264.415136 | 264.4055264 | 264.1404192 | 261.1478824 |
| 264.429232 | 264.4328688 | 264.4360528 | 264.417136 | 264.4065264 | 264.1434192 | 261.1458824 |
| 264.426232 | 264.4318688 | 264.4330528 | 264.414136 | 264.4045264 | 264.1404192 | 261.1468824 |
| 264.426232 | 264.4318688 | 264.4350528 | 264.414136 | 264.4045264 | 264.1394192 | 261.1438824 |
| 264.430232 | 264.4348688 | 264.4350528 | 264.416136 | 264.4065264 | 264.1374192 | 261.1468824 |
| 264.427232 | 264.4318688 | 264.4340528 | 264.415136 | 264.4055264 | 264.1364192 | 261.1458824 |
| 264.426232 | 264.4328688 | 264.4330528 | 264.414136 | 264.4045264 | 264.1394192 | 261.1458824 |
| 264.426232 | 264.4328688 | 264.4330528 | 264.414136 | 264.4055264 | 264.1394192 | 261.1478824 |
| 264.428232 | 264.4328688 | 264.4330528 | 264.415136 | 264.4045264 | 264.1394192 | 261.1498824 |
| 264.429232 | 264.4328688 | 264.4330528 | 264.414136 | 264.4065264 | 264.1384192 | 261.1478824 |
| 264.426232 | 264.4298688 | 264.4320528 | 264.413136 | 264.4035264 | 264.1384192 | 261.1468824 |
| 264.429232 | 264.4328688 | 264.4340528 | 264.415136 | 264.4055264 | 264.1384192 | 261.1488824 |
| 264.428232 | 264.4338688 | 264.4350528 | 264.415136 | 264.4075264 | 264.1394192 | 261.1488824 |
| 264.429232 | 264.4318688 | 264.4340528 | 264.415136 | 264.4065264 | 264.1384192 | 261.1478824 |
| 264.426232 | 264.4308688 | 264.4330528 | 264.414136 | 264.4035264 | 264.1374192 | 261.1448824 |
| 264.427232 | 264.4298688 | 264.4310528 | 264.411136 | 264.4005264 | 264.1384192 | 261.1488824 |

|            |             |             |            |             |             |             |
|------------|-------------|-------------|------------|-------------|-------------|-------------|
| 264.425232 | 264.4298688 | 264.4320528 | 264.411136 | 264.4045264 | 264.1384192 | 261.1468824 |
| 264.428232 | 264.4318688 | 264.4320528 | 264.413136 | 264.4045264 | 264.1374192 | 261.1458824 |
| 264.428232 | 264.4298688 | 264.4320528 | 264.414136 | 264.4045264 | 264.1394192 | 261.1478824 |
| 264.428232 | 264.4318688 | 264.4310528 | 264.414136 | 264.4055264 | 264.1394192 | 261.1458824 |
| 264.429232 | 264.4318688 | 264.4310528 | 264.416136 | 264.4055264 | 264.1404192 | 261.1478824 |
| 264.427232 | 264.4328688 | 264.4320528 | 264.414136 | 264.4045264 | 264.1374192 | 261.1488824 |
| 264.428232 | 264.4308688 | 264.4300528 | 264.414136 | 264.4045264 | 264.1394192 | 261.1448824 |
| 264.426232 | 264.4328688 | 264.4310528 | 264.415136 | 264.4025264 | 264.1394192 | 261.1468824 |
| 264.429232 | 264.4328688 | 264.4330528 | 264.415136 | 264.4055264 | 264.1394192 | 261.1478824 |
| 264.429232 | 264.4328688 | 264.4310528 | 264.415136 | 264.4065264 | 264.1394192 | 261.1488824 |
| 264.429232 | 264.4318688 | 264.4320528 | 264.412136 | 264.4035264 | 264.1384192 | 261.1478824 |
| 264.428232 | 264.4318688 | 264.4320528 | 264.414136 | 264.4035264 | 264.1404192 | 261.1478824 |
| 264.428232 | 264.4308688 | 264.4310528 | 264.414136 | 264.4025264 | 264.1374192 | 261.1468824 |
| 264.424232 | 264.4288688 | 264.4300528 | 264.410136 | 264.4015264 | 264.1374192 | 261.1438824 |
| 264.422232 | 264.4278688 | 264.4300528 | 264.408136 | 264.4005264 | 264.1374192 | 261.1438824 |
| 264.425232 | 264.4288688 | 264.4300528 | 264.412136 | 264.4025264 | 264.1354192 | 261.1438824 |
| 264.426232 | 264.4298688 | 264.4320528 | 264.413136 | 264.4045264 | 264.1394192 | 261.1438824 |
| 264.424232 | 264.4278688 | 264.4290528 | 264.411136 | 264.4015264 | 264.1364192 | 261.1458824 |
| 264.424232 | 264.4278688 | 264.4280528 | 264.409136 | 264.4005264 | 264.1354192 | 261.1438824 |
| 264.424232 | 264.4298688 | 264.4320528 | 264.411136 | 264.4005264 | 264.1374192 | 261.1478824 |
| 264.423232 | 264.4288688 | 264.4300528 | 264.410136 | 264.3975264 | 264.1364192 | 261.1458824 |
| 264.424232 | 264.4288688 | 264.4330528 | 264.410136 | 264.3995264 | 264.1334192 | 261.1468824 |
| 264.425232 | 264.4298688 | 264.4310528 | 264.408136 | 264.4005264 | 264.1364192 | 261.1458824 |
| 264.424232 | 264.4268688 | 264.4290528 | 264.409136 | 264.3995264 | 264.1354192 | 261.1458824 |
| 264.424232 | 264.4298688 | 264.4300528 | 264.409136 | 264.4015264 | 264.1354192 | 261.1448824 |
| 264.425232 | 264.4258688 | 264.4300528 | 264.409136 | 264.4005264 | 264.1344192 | 261.1448824 |
| 264.423232 | 264.4258688 | 264.4290528 | 264.406136 | 264.4005264 | 264.1344192 | 261.1448824 |
| 264.423232 | 264.4258688 | 264.4290528 | 264.408136 | 264.3985264 | 264.1324192 | 261.1448824 |
| 264.423232 | 264.4298688 | 264.4310528 | 264.409136 | 264.4005264 | 264.1364192 | 261.1468824 |
| 264.422232 | 264.4268688 | 264.4290528 | 264.408136 | 264.3995264 | 264.1334192 | 261.1448824 |
| 264.422232 | 264.4268688 | 264.4310528 | 264.408136 | 264.3995264 | 264.1344192 | 261.1448824 |
| 264.422232 | 264.4268688 | 264.4280528 | 264.406136 | 264.3995264 | 264.1334192 | 261.1448824 |
| 264.421232 | 264.4248688 | 264.4300528 | 264.406136 | 264.3975264 | 264.1334192 | 261.1458824 |
| 264.421232 | 264.4268688 | 264.4300528 | 264.407136 | 264.3975264 | 264.1324192 | 261.1438824 |
| 264.420232 | 264.4248688 | 264.4280528 | 264.405136 | 264.3965264 | 264.1344192 | 261.1428824 |
| 264.422232 | 264.4258688 | 264.4290528 | 264.406136 | 264.3965264 | 264.1314192 | 261.1428824 |
| 264.420232 | 264.4268688 | 264.4290528 | 264.406136 | 264.3965264 | 264.1334192 | 261.1438824 |
| 264.420232 | 264.4258688 | 264.4270528 | 264.406136 | 264.3975264 | 264.1314192 | 261.1448824 |
| 264.421232 | 264.4258688 | 264.4300528 | 264.406136 | 264.3955264 | 264.1324192 | 261.1428824 |
| 264.421232 | 264.4228688 | 264.4280528 | 264.405136 | 264.3965264 | 264.1284192 | 261.1438824 |
| 264.419232 | 264.4248688 | 264.4280528 | 264.405136 | 264.3965264 | 264.1304192 | 261.1438824 |
| 264.418232 | 264.4228688 | 264.4270528 | 264.403136 | 264.3945264 | 264.1284192 | 261.1448824 |
| 264.415232 | 264.4218688 | 264.4270528 | 264.402136 | 264.3935264 | 264.1294192 | 261.1438824 |
| 264.417232 | 264.4218688 | 264.4280528 | 264.404136 | 264.3935264 | 264.1304192 | 261.1438824 |
| 264.417232 | 264.4238688 | 264.4280528 | 264.404136 | 264.3955264 | 264.1304192 | 261.1438824 |
| 264.416232 | 264.4218688 | 264.4240528 | 264.402136 | 264.3925264 | 264.1284192 | 261.1428824 |
| 264.419232 | 264.4238688 | 264.4280528 | 264.402136 | 264.3935264 | 264.1264192 | 261.1438824 |

|            |             |             |            |             |             |             |
|------------|-------------|-------------|------------|-------------|-------------|-------------|
| 264.416232 | 264.4208688 | 264.4250528 | 264.401136 | 264.3905264 | 264.1234192 | 261.1408824 |
| 264.414232 | 264.4208688 | 264.4260528 | 264.402136 | 264.3905264 | 264.1254192 | 261.1408824 |
| 264.414232 | 264.4208688 | 264.4250528 | 264.399136 | 264.3925264 | 264.1234192 | 261.1428824 |
| 264.415232 | 264.4208688 | 264.4250528 | 264.399136 | 264.3895264 | 264.1244192 | 261.1428824 |
| 264.415232 | 264.4208688 | 264.4250528 | 264.399136 | 264.3925264 | 264.1244192 | 261.1428824 |
| 264.415232 | 264.4188688 | 264.4230528 | 264.401136 | 264.3895264 | 264.1244192 | 261.1418824 |
| 264.415232 | 264.4178688 | 264.4240528 | 264.398136 | 264.3895264 | 264.1224192 | 261.1418824 |
| 264.413232 | 264.4178688 | 264.4240528 | 264.398136 | 264.3885264 | 264.1224192 | 261.1428824 |
| 264.413232 | 264.4198688 | 264.4250528 | 264.400136 | 264.3895264 | 264.1224192 | 261.1418824 |
| 264.413232 | 264.4178688 | 264.4270528 | 264.398136 | 264.3885264 | 264.1204192 | 261.1398824 |
| 264.413232 | 264.4178688 | 264.4270528 | 264.399136 | 264.3875264 | 264.1224192 | 261.1428824 |
| 264.413232 | 264.4178688 | 264.4260528 | 264.397136 | 264.3885264 | 264.1214192 | 261.1418824 |
| 264.412232 | 264.4188688 | 264.4250528 | 264.395136 | 264.3855264 | 264.1214192 | 261.1408824 |
| 264.412232 | 264.4168688 | 264.4260528 | 264.400136 | 264.3885264 | 264.1214192 | 261.1418824 |
| 264.409232 | 264.4148688 | 264.4250528 | 264.395136 | 264.3875264 | 264.1204192 | 261.1408824 |
| 264.413232 | 264.4178688 | 264.4240528 | 264.397136 | 264.3865264 | 264.1214192 | 261.1438824 |
| 264.409232 | 264.4158688 | 264.4230528 | 264.394136 | 264.3845264 | 264.1204192 | 261.1388824 |
| 264.409232 | 264.4158688 | 264.4230528 | 264.396136 | 264.3845264 | 264.1184192 | 261.1408824 |
| 264.410232 | 264.4138688 | 264.4220528 | 264.393136 | 264.3845264 | 264.1194192 | 261.1398824 |
| 264.408232 | 264.4158688 | 264.4220528 | 264.394136 | 264.3845264 | 264.1194192 | 261.1408824 |
| 264.409232 | 264.4158688 | 264.4230528 | 264.393136 | 264.3835264 | 264.1194192 | 261.1388824 |
| 264.409232 | 264.4148688 | 264.4230528 | 264.395136 | 264.3835264 | 264.1194192 | 261.1418824 |
| 264.409232 | 264.4148688 | 264.4210528 | 264.395136 | 264.3855264 | 264.1204192 | 261.1398824 |
| 264.409232 | 264.4148688 | 264.4230528 | 264.395136 | 264.3825264 | 264.1174192 | 261.1388824 |
| 264.408232 | 264.4118688 | 264.4200528 | 264.391136 | 264.3825264 | 264.1134192 | 261.1378824 |
| 264.409232 | 264.4148688 | 264.4220528 | 264.394136 | 264.3835264 | 264.1174192 | 261.1418824 |
| 264.409232 | 264.4118688 | 264.4190528 | 264.391136 | 264.3815264 | 264.1144192 | 261.1378824 |
| 264.409232 | 264.4138688 | 264.4210528 | 264.394136 | 264.3835264 | 264.1204192 | 261.1398824 |
| 264.407232 | 264.4148688 | 264.4230528 | 264.393136 | 264.3815264 | 264.1164192 | 261.1408824 |
| 264.404232 | 264.4108688 | 264.4200528 | 264.390136 | 264.3825264 | 264.1154192 | 261.1368824 |
| 264.408232 | 264.4108688 | 264.4200528 | 264.391136 | 264.3825264 | 264.1134192 | 261.1368824 |
| 264.408232 | 264.4108688 | 264.4200528 | 264.390136 | 264.3805264 | 264.1144192 | 261.1368824 |
| 264.404232 | 264.4108688 | 264.4170528 | 264.392136 | 264.3805264 | 264.1154192 | 261.1348824 |
| 264.405232 | 264.4108688 | 264.4190528 | 264.390136 | 264.3805264 | 264.1144192 | 261.1358824 |
| 264.408232 | 264.4108688 | 264.4210528 | 264.390136 | 264.3825264 | 264.1164192 | 261.1368824 |
| 264.406232 | 264.4118688 | 264.4200528 | 264.389136 | 264.3795264 | 264.1134192 | 261.1358824 |
| 264.406232 | 264.4118688 | 264.4180528 | 264.391136 | 264.3815264 | 264.1154192 | 261.1348824 |
| 264.406232 | 264.4118688 | 264.4180528 | 264.391136 | 264.3835264 | 264.1194192 | 261.1348824 |
| 264.406232 | 264.4118688 | 264.4180528 | 264.392136 | 264.3815264 | 264.1174192 | 261.1358824 |
| 264.405232 | 264.4088688 | 264.4160528 | 264.390136 | 264.3815264 | 264.1154192 | 261.1318824 |
| 264.408232 | 264.4118688 | 264.4170528 | 264.393136 | 264.3825264 | 264.1164192 | 261.1328824 |
| 264.411232 | 264.4148688 | 264.4200528 | 264.396136 | 264.3855264 | 264.1204192 | 261.1358824 |
| 264.411232 | 264.4128688 | 264.4160528 | 264.394136 | 264.3835264 | 264.1184192 | 261.1348824 |
| 264.410232 | 264.4128688 | 264.4160528 | 264.396136 | 264.3835264 | 264.1214192 | 261.1328824 |
| 264.412232 | 264.4158688 | 264.4190528 | 264.397136 | 264.3865264 | 264.1234192 | 261.1338824 |
| 264.411232 | 264.4148688 | 264.4160528 | 264.397136 | 264.3855264 | 264.1224192 | 261.1328824 |
| 264.411232 | 264.4148688 | 264.4160528 | 264.396136 | 264.3865264 | 264.1224192 | 261.1328824 |

|            |             |             |            |             |             |             |
|------------|-------------|-------------|------------|-------------|-------------|-------------|
| 264.413232 | 264.4158688 | 264.4180528 | 264.399136 | 264.3905264 | 264.1274192 | 261.1328824 |
| 264.416232 | 264.4198688 | 264.4180528 | 264.400136 | 264.3895264 | 264.1274192 | 261.1328824 |
| 264.417232 | 264.4218688 | 264.4180528 | 264.405136 | 264.3925264 | 264.1304192 | 261.1338824 |
| 264.418232 | 264.4218688 | 264.4180528 | 264.404136 | 264.3945264 | 264.1334192 | 261.1298824 |
| 264.418232 | 264.4218688 | 264.4160528 | 264.404136 | 264.3945264 | 264.1334192 | 261.1318824 |
| 264.418232 | 264.4208688 | 264.4160528 | 264.406136 | 264.3955264 | 264.1334192 | 261.1318824 |
| 264.419232 | 264.4228688 | 264.4170528 | 264.406136 | 264.3965264 | 264.1384192 | 261.1318824 |
| 264.422232 | 264.4248688 | 264.4190528 | 264.409136 | 264.3965264 | 264.1374192 | 261.1328824 |
| 264.424232 | 264.4258688 | 264.4180528 | 264.410136 | 264.3995264 | 264.1384192 | 261.1328824 |
| 264.425232 | 264.4258688 | 264.4190528 | 264.410136 | 264.3995264 | 264.1404192 | 261.1318824 |
| 264.424232 | 264.4268688 | 264.4210528 | 264.409136 | 264.4005264 | 264.1374192 | 261.1318824 |
| 264.428232 | 264.4308688 | 264.4230528 | 264.415136 | 264.4045264 | 264.1454192 | 261.1338824 |
| 264.428232 | 264.4308688 | 264.4230528 | 264.411136 | 264.4045264 | 264.1434192 | 261.1328824 |
| 264.429232 | 264.4308688 | 264.4220528 | 264.413136 | 264.4035264 | 264.1424192 | 261.1318824 |
| 264.427232 | 264.4308688 | 264.4220528 | 264.413136 | 264.4035264 | 264.1454192 | 261.1318824 |
| 264.427232 | 264.4318688 | 264.4210528 | 264.414136 | 264.4045264 | 264.1434192 | 261.1318824 |
| 264.430232 | 264.4328688 | 264.4250528 | 264.415136 | 264.4065264 | 264.1444192 | 261.1348824 |
| 264.428232 | 264.4318688 | 264.4230528 | 264.414136 | 264.4045264 | 264.1444192 | 261.1328824 |
| 264.429232 | 264.4328688 | 264.4230528 | 264.413136 | 264.4055264 | 264.1454192 | 261.1358824 |
| 264.430232 | 264.4338688 | 264.4250528 | 264.416136 | 264.4065264 | 264.1454192 | 261.1368824 |
| 264.430232 | 264.4328688 | 264.4230528 | 264.414136 | 264.4045264 | 264.1454192 | 261.1368824 |
| 264.427232 | 264.4278688 | 264.4220528 | 264.410136 | 264.4035264 | 264.1424192 | 261.1338824 |
| 264.426232 | 264.4298688 | 264.4210528 | 264.411136 | 264.4035264 | 264.1414192 | 261.1358824 |
| 264.427232 | 264.4308688 | 264.4220528 | 264.414136 | 264.4055264 | 264.1424192 | 261.1348824 |
| 264.427232 | 264.4318688 | 264.4220528 | 264.412136 | 264.4035264 | 264.1394192 | 261.1358824 |
| 264.428232 | 264.4318688 | 264.4230528 | 264.415136 | 264.4065264 | 264.1414192 | 261.1388824 |
| 264.428232 | 264.4298688 | 264.4240528 | 264.415136 | 264.4065264 | 264.1404192 | 261.1388824 |
| 264.426232 | 264.4318688 | 264.4240528 | 264.413136 | 264.4085264 | 264.1394192 | 261.1378824 |
| 264.427232 | 264.4298688 | 264.4240528 | 264.413136 | 264.4045264 | 264.1424192 | 261.1388824 |
| 264.428232 | 264.4328688 | 264.4250528 | 264.414136 | 264.4075264 | 264.1394192 | 261.1418824 |
| 264.426232 | 264.4298688 | 264.4230528 | 264.409136 | 264.4015264 | 264.1394192 | 261.1418824 |
| 264.428232 | 264.4308688 | 264.4250528 | 264.412136 | 264.4035264 | 264.1394192 | 261.1408824 |
| 264.426232 | 264.4288688 | 264.4240528 | 264.410136 | 264.4025264 | 264.1424192 | 261.1408824 |
| 264.424232 | 264.4278688 | 264.4230528 | 264.409136 | 264.4015264 | 264.1374192 | 261.1398824 |
| 264.427232 | 264.4308688 | 264.4230528 | 264.410136 | 264.4025264 | 264.1374192 | 261.1428824 |
| 264.427232 | 264.4288688 | 264.4260528 | 264.412136 | 264.4045264 | 264.1384192 | 261.1428824 |
| 264.425232 | 264.4288688 | 264.4240528 | 264.410136 | 264.4005264 | 264.1384192 | 261.1428824 |
| 264.426232 | 264.4318688 | 264.4250528 | 264.413136 | 264.4055264 | 264.1394192 | 261.1438824 |
| 264.423232 | 264.4288688 | 264.4230528 | 264.408136 | 264.4005264 | 264.1354192 | 261.1438824 |
| 264.424232 | 264.4268688 | 264.4230528 | 264.408136 | 264.4005264 | 264.1374192 | 261.1418824 |
| 264.424232 | 264.4288688 | 264.4230528 | 264.410136 | 264.4005264 | 264.1354192 | 261.1438824 |
| 264.424232 | 264.4278688 | 264.4230528 | 264.409136 | 264.3995264 | 264.1354192 | 261.1428824 |
| 264.423232 | 264.4278688 | 264.4240528 | 264.409136 | 264.4015264 | 264.1364192 | 261.1428824 |
| 264.425232 | 264.4278688 | 264.4240528 | 264.411136 | 264.4005264 | 264.1384192 | 261.1458824 |
| 264.422232 | 264.4278688 | 264.4230528 | 264.409136 | 264.4005264 | 264.1354192 | 261.1458824 |
| 264.422232 | 264.4278688 | 264.4230528 | 264.407136 | 264.4005264 | 264.1354192 | 261.1448824 |
| 264.424232 | 264.4278688 | 264.4230528 | 264.408136 | 264.3995264 | 264.1354192 | 261.1438824 |



|            |             |             |            |             |             |             |
|------------|-------------|-------------|------------|-------------|-------------|-------------|
| 264.420232 | 264.4258688 | 264.4230528 | 264.407136 | 264.3985264 | 264.1334192 | 261.1438824 |
| 264.423232 | 264.4268688 | 264.4240528 | 264.408136 | 264.3995264 | 264.1344192 | 261.1448824 |
| 264.423232 | 264.4268688 | 264.4220528 | 264.408136 | 264.3975264 | 264.1344192 | 261.1448824 |
| 264.421232 | 264.4268688 | 264.4220528 | 264.408136 | 264.3995264 | 264.1344192 | 261.1438824 |
| 264.421232 | 264.4268688 | 264.4220528 | 264.406136 | 264.3995264 | 264.1344192 | 261.1418824 |
| 264.424232 | 264.4268688 | 264.4230528 | 264.409136 | 264.4005264 | 264.1344192 | 261.1428824 |
| 264.422232 | 264.4268688 | 264.4250528 | 264.409136 | 264.4005264 | 264.1374192 | 261.1448824 |
| 264.423232 | 264.4278688 | 264.4240528 | 264.410136 | 264.4015264 | 264.1364192 | 261.1438824 |
| 264.420232 | 264.4238688 | 264.4210528 | 264.407136 | 264.3985264 | 264.1364192 | 261.1408824 |
| 264.422232 | 264.4258688 | 264.4250528 | 264.406136 | 264.4015264 | 264.1354192 | 261.1458824 |
| 264.422232 | 264.4258688 | 264.4230528 | 264.408136 | 264.4005264 | 264.1354192 | 261.1438824 |
| 264.423232 | 264.4258688 | 264.4240528 | 264.409136 | 264.4005264 | 264.1384192 | 261.1448824 |
| 264.423232 | 264.4268688 | 264.4240528 | 264.410136 | 264.4015264 | 264.1384192 | 261.1428824 |
| 264.425232 | 264.4288688 | 264.4240528 | 264.409136 | 264.3995264 | 264.1384192 | 261.1448824 |
| 264.428232 | 264.4288688 | 264.4240528 | 264.412136 | 264.4015264 | 264.1374192 | 261.1448824 |
| 264.423232 | 264.4258688 | 264.4240528 | 264.409136 | 264.4015264 | 264.1364192 | 261.1428824 |
| 264.426232 | 264.4268688 | 264.4240528 | 264.410136 | 264.4015264 | 264.1354192 | 261.1448824 |
| 264.425232 | 264.4268688 | 264.4240528 | 264.410136 | 264.4035264 | 264.1364192 | 261.1418824 |
| 264.425232 | 264.4268688 | 264.4240528 | 264.409136 | 264.4015264 | 264.1364192 | 261.1418824 |
| 264.424232 | 264.4288688 | 264.4220528 | 264.410136 | 264.4015264 | 264.1394192 | 261.1428824 |
| 264.427232 | 264.4278688 | 264.4230528 | 264.412136 | 264.4045264 | 264.1384192 | 261.1438824 |
| 264.427232 | 264.4298688 | 264.4250528 | 264.413136 | 264.4045264 | 264.1384192 | 261.1428824 |
| 264.427232 | 264.4278688 | 264.4230528 | 264.411136 | 264.4025264 | 264.1384192 | 261.1428824 |
| 264.424232 | 264.4268688 | 264.4220528 | 264.408136 | 264.4005264 | 264.1384192 | 261.1408824 |
| 264.428232 | 264.4308688 | 264.4260528 | 264.412136 | 264.4055264 | 264.1414192 | 261.1448824 |
| 264.428232 | 264.4308688 | 264.4240528 | 264.412136 | 264.4035264 | 264.1394192 | 261.1438824 |
| 264.425232 | 264.4278688 | 264.4240528 | 264.411136 | 264.4005264 | 264.1394192 | 261.1418824 |
| 264.425232 | 264.4278688 | 264.4230528 | 264.411136 | 264.4025264 | 264.1384192 | 261.1438824 |
| 264.427232 | 264.4308688 | 264.4240528 | 264.414136 | 264.4045264 | 264.1374192 | 261.1448824 |
| 264.426232 | 264.4278688 | 264.4240528 | 264.411136 | 264.4015264 | 264.1414192 | 261.1408824 |
| 264.424232 | 264.4278688 | 264.4200528 | 264.408136 | 264.4005264 | 264.1374192 | 261.1408824 |
| 264.427232 | 264.4308688 | 264.4250528 | 264.412136 | 264.4045264 | 264.1434192 | 261.1458824 |
| 264.425232 | 264.4268688 | 264.4250528 | 264.412136 | 264.4045264 | 264.1404192 | 261.1448824 |
| 264.425232 | 264.4268688 | 264.4240528 | 264.408136 | 264.4005264 | 264.1414192 | 261.1448824 |
| 264.426232 | 264.4288688 | 264.4260528 | 264.411136 | 264.4035264 | 264.1414192 | 261.1458824 |
| 264.424232 | 264.4258688 | 264.4240528 | 264.408136 | 264.4015264 | 264.1394192 | 261.1438824 |
| 264.422232 | 264.4248688 | 264.4240528 | 264.406136 | 264.3985264 | 264.1374192 | 261.1418824 |
| 264.419232 | 264.4268688 | 264.4240528 | 264.407136 | 264.3995264 | 264.1394192 | 261.1438824 |
| 264.419232 | 264.4248688 | 264.4220528 | 264.404136 | 264.3975264 | 264.1374192 | 261.1428824 |
| 264.422232 | 264.4248688 | 264.4230528 | 264.405136 | 264.3965264 | 264.1364192 | 261.1458824 |
| 264.420232 | 264.4248688 | 264.4230528 | 264.405136 | 264.3965264 | 264.1354192 | 261.1448824 |
| 264.415232 | 264.4228688 | 264.4220528 | 264.404136 | 264.3955264 | 264.1314192 | 261.1458824 |
| 264.415232 | 264.4198688 | 264.4210528 | 264.401136 | 264.3935264 | 264.1324192 | 261.1428824 |
| 264.415232 | 264.4198688 | 264.4210528 | 264.399136 | 264.3935264 | 264.1304192 | 261.1428824 |
| 264.419232 | 264.4228688 | 264.4210528 | 264.402136 | 264.3945264 | 264.1324192 | 261.1458824 |
| 264.413232 | 264.4178688 | 264.4190528 | 264.399136 | 264.3915264 | 264.1304192 | 261.1428824 |
| 264.415232 | 264.4198688 | 264.4200528 | 264.399136 | 264.3905264 | 264.1284192 | 261.1428824 |

|            |             |             |            |             |             |             |
|------------|-------------|-------------|------------|-------------|-------------|-------------|
| 264.414232 | 264.4178688 | 264.4200528 | 264.399136 | 264.3915264 | 264.1274192 | 261.1448824 |
| 264.412232 | 264.4178688 | 264.4200528 | 264.399136 | 264.3895264 | 264.1294192 | 261.1428824 |
| 264.412232 | 264.4178688 | 264.4190528 | 264.397136 | 264.3895264 | 264.1274192 | 261.1428824 |
| 264.411232 | 264.4178688 | 264.4220528 | 264.398136 | 264.3885264 | 264.1264192 | 261.1448824 |
| 264.412232 | 264.4168688 | 264.4210528 | 264.396136 | 264.3875264 | 264.1254192 | 261.1448824 |
| 264.411232 | 264.4158688 | 264.4180528 | 264.395136 | 264.3865264 | 264.1224192 | 261.1438824 |
| 264.409232 | 264.4158688 | 264.4180528 | 264.393136 | 264.3835264 | 264.1244192 | 261.1438824 |
| 264.407232 | 264.4138688 | 264.4200528 | 264.393136 | 264.3865264 | 264.1244192 | 261.1438824 |
| 264.406232 | 264.4128688 | 264.4170528 | 264.390136 | 264.3835264 | 264.1224192 | 261.1438824 |
| 264.407232 | 264.4128688 | 264.4180528 | 264.391136 | 264.3845264 | 264.1224192 | 261.1438824 |
| 264.406232 | 264.4108688 | 264.4170528 | 264.390136 | 264.3815264 | 264.1204192 | 261.1388824 |
| 264.405232 | 264.4098688 | 264.4160528 | 264.390136 | 264.3815264 | 264.1204192 | 261.1418824 |
| 264.408232 | 264.4118688 | 264.4210528 | 264.392136 | 264.3825264 | 264.1214192 | 261.1428824 |
| 264.406232 | 264.4108688 | 264.4170528 | 264.389136 | 264.3805264 | 264.1194192 | 261.1408824 |
| 264.407232 | 264.4118688 | 264.4200528 | 264.392136 | 264.3815264 | 264.1204192 | 261.1418824 |
| 264.406232 | 264.4098688 | 264.4190528 | 264.391136 | 264.3815264 | 264.1194192 | 261.1408824 |
| 264.404232 | 264.4088688 | 264.4170528 | 264.389136 | 264.3805264 | 264.1174192 | 261.1388824 |
| 264.403232 | 264.4088688 | 264.4160528 | 264.387136 | 264.3795264 | 264.1164192 | 261.1378824 |
| 264.404232 | 264.4078688 | 264.4160528 | 264.389136 | 264.3795264 | 264.1174192 | 261.1378824 |
| 264.405232 | 264.4088688 | 264.4180528 | 264.388136 | 264.3795264 | 264.1184192 | 261.1368824 |
| 264.403232 | 264.4088688 | 264.4180528 | 264.389136 | 264.3815264 | 264.1144192 | 261.1378824 |
| 264.401232 | 264.4088688 | 264.4160528 | 264.388136 | 264.3775264 | 264.1144192 | 261.1368824 |
| 264.403232 | 264.4078688 | 264.4160528 | 264.388136 | 264.3775264 | 264.1144192 | 261.1348824 |
| 264.402232 | 264.4068688 | 264.4130528 | 264.386136 | 264.3765264 | 264.1154192 | 261.1328824 |
| 264.403232 | 264.4088688 | 264.4160528 | 264.387136 | 264.3795264 | 264.1164192 | 261.1358824 |
| 264.402232 | 264.4098688 | 264.4160528 | 264.387136 | 264.3795264 | 264.1154192 | 261.1358824 |
| 264.399232 | 264.4078688 | 264.4140528 | 264.385136 | 264.3775264 | 264.1124192 | 261.1318824 |
| 264.402232 | 264.4078688 | 264.4140528 | 264.388136 | 264.3775264 | 264.1154192 | 261.1338824 |
| 264.401232 | 264.4068688 | 264.4150528 | 264.386136 | 264.3765264 | 264.1104192 | 261.1328824 |
| 264.400232 | 264.4058688 | 264.4140528 | 264.386136 | 264.3755264 | 264.1114192 | 261.1318824 |
| 264.399232 | 264.4058688 | 264.4130528 | 264.383136 | 264.3755264 | 264.1104192 | 261.1308824 |
| 264.397232 | 264.4058688 | 264.4100528 | 264.382136 | 264.3765264 | 264.1104192 | 261.1288824 |
| 264.400232 | 264.4058688 | 264.4120528 | 264.384136 | 264.3765264 | 264.1114192 | 261.1308824 |
| 264.398232 | 264.4058688 | 264.4120528 | 264.384136 | 264.3765264 | 264.1114192 | 261.1298824 |
| 264.401232 | 264.4048688 | 264.4110528 | 264.386136 | 264.3755264 | 264.1104192 | 261.1278824 |
| 264.402232 | 264.4058688 | 264.4130528 | 264.387136 | 264.3785264 | 264.1124192 | 261.1308824 |
| 264.402232 | 264.4058688 | 264.4120528 | 264.386136 | 264.3775264 | 264.1134192 | 261.1278824 |
| 264.401232 | 264.4048688 | 264.4090528 | 264.386136 | 264.3785264 | 264.1144192 | 261.1288824 |
| 264.403232 | 264.4088688 | 264.4100528 | 264.387136 | 264.3805264 | 264.1164192 | 261.1288824 |
| 264.407232 | 264.4088688 | 264.4120528 | 264.389136 | 264.3835264 | 264.1164192 | 261.1318824 |
| 264.408232 | 264.4108688 | 264.4110528 | 264.392136 | 264.3845264 | 264.1174192 | 261.1288824 |
| 264.410232 | 264.4108688 | 264.4090528 | 264.393136 | 264.3845264 | 264.1214192 | 261.1278824 |
| 264.409232 | 264.4098688 | 264.4110528 | 264.395136 | 264.3855264 | 264.1254192 | 261.1278824 |
| 264.412232 | 264.4128688 | 264.4100528 | 264.394136 | 264.3855264 | 264.1294192 | 261.1278824 |
| 264.410232 | 264.4168688 | 264.4110528 | 264.397136 | 264.3865264 | 264.1304192 | 261.1278824 |
| 264.412232 | 264.4168688 | 264.4100528 | 264.398136 | 264.3905264 | 264.1294192 | 261.1298824 |
| 264.416232 | 264.4178688 | 264.4120528 | 264.402136 | 264.3925264 | 264.1334192 | 261.1298824 |

|            |             |             |            |             |             |             |
|------------|-------------|-------------|------------|-------------|-------------|-------------|
| 264.414232 | 264.4168688 | 264.4130528 | 264.400136 | 264.3915264 | 264.1344192 | 261.1288824 |
| 264.416232 | 264.4188688 | 264.4100528 | 264.401136 | 264.3935264 | 264.1354192 | 261.1258824 |
| 264.417232 | 264.4198688 | 264.4110528 | 264.404136 | 264.3965264 | 264.1344192 | 261.1278824 |
| 264.419232 | 264.4208688 | 264.4110528 | 264.405136 | 264.3965264 | 264.1364192 | 261.1268824 |
| 264.419232 | 264.4218688 | 264.4120528 | 264.404136 | 264.3955264 | 264.1374192 | 261.1258824 |
| 264.419232 | 264.4238688 | 264.4130528 | 264.406136 | 264.3985264 | 264.1404192 | 261.1288824 |
| 264.419232 | 264.4238688 | 264.4130528 | 264.405136 | 264.3985264 | 264.1404192 | 261.1278824 |
| 264.418232 | 264.4188688 | 264.4100528 | 264.404136 | 264.3975264 | 264.1394192 | 261.1268824 |
| 264.420232 | 264.4228688 | 264.4130528 | 264.405136 | 264.3965264 | 264.1404192 | 261.1278824 |
| 264.417232 | 264.4208688 | 264.4140528 | 264.404136 | 264.3965264 | 264.1404192 | 261.1278824 |
| 264.413232 | 264.4178688 | 264.4120528 | 264.398136 | 264.3915264 | 264.1384192 | 261.1238824 |
| 264.416232 | 264.4208688 | 264.4130528 | 264.403136 | 264.3965264 | 264.1354192 | 261.1258824 |
| 264.415232 | 264.4198688 | 264.4110528 | 264.402136 | 264.3955264 | 264.1364192 | 261.1298824 |
| 264.415232 | 264.4198688 | 264.4120528 | 264.400136 | 264.3955264 | 264.1354192 | 261.1278824 |
| 264.416232 | 264.4188688 | 264.4130528 | 264.399136 | 264.3925264 | 264.1344192 | 261.1268824 |
| 264.411232 | 264.4168688 | 264.4140528 | 264.401136 | 264.3915264 | 264.1334192 | 261.1298824 |
| 264.414232 | 264.4158688 | 264.4110528 | 264.398136 | 264.3905264 | 264.1314192 | 261.1288824 |
| 264.411232 | 264.4178688 | 264.4110528 | 264.398136 | 264.3905264 | 264.1294192 | 261.1328824 |
| 264.411232 | 264.4168688 | 264.4120528 | 264.394136 | 264.3875264 | 264.1304192 | 261.1298824 |
| 264.407232 | 264.4148688 | 264.4130528 | 264.395136 | 264.3875264 | 264.1294192 | 261.1328824 |
| 264.410232 | 264.4148688 | 264.4100528 | 264.395136 | 264.3895264 | 264.1304192 | 261.1328824 |
| 264.411232 | 264.4148688 | 264.4130528 | 264.397136 | 264.3905264 | 264.1264192 | 261.1328824 |
| 264.411232 | 264.4168688 | 264.4150528 | 264.399136 | 264.3905264 | 264.1264192 | 261.1358824 |
| 264.407232 | 264.4138688 | 264.4090528 | 264.396136 | 264.3885264 | 264.1264192 | 261.1348824 |
| 264.407232 | 264.4138688 | 264.4110528 | 264.396136 | 264.3885264 | 264.1294192 | 261.1348824 |
| 264.411232 | 264.4158688 | 264.4110528 | 264.396136 | 264.3885264 | 264.1284192 | 261.1348824 |
| 264.411232 | 264.4158688 | 264.4120528 | 264.398136 | 264.3875264 | 264.1284192 | 261.1368824 |
| 264.409232 | 264.4148688 | 264.4110528 | 264.395136 | 264.3875264 | 264.1274192 | 261.1328824 |
| 264.411232 | 264.4128688 | 264.4110528 | 264.397136 | 264.3885264 | 264.1284192 | 261.1348824 |
| 264.409232 | 264.4148688 | 264.4130528 | 264.396136 | 264.3905264 | 264.1284192 | 261.1378824 |
| 264.410232 | 264.4138688 | 264.4130528 | 264.394136 | 264.3865264 | 264.1304192 | 261.1368824 |
| 264.410232 | 264.4138688 | 264.4130528 | 264.396136 | 264.3885264 | 264.1284192 | 261.1378824 |
| 264.408232 | 264.4138688 | 264.4120528 | 264.396136 | 264.3875264 | 264.1304192 | 261.1388824 |
| 264.409232 | 264.4128688 | 264.4090528 | 264.393136 | 264.3875264 | 264.1264192 | 261.1388824 |
| 264.409232 | 264.4138688 | 264.4110528 | 264.395136 | 264.3865264 | 264.1264192 | 261.1378824 |
| 264.410232 | 264.4128688 | 264.4130528 | 264.394136 | 264.3885264 | 264.1274192 | 261.1378824 |
| 264.407232 | 264.4128688 | 264.4120528 | 264.394136 | 264.3875264 | 264.1244192 | 261.1368824 |
| 264.406232 | 264.4098688 | 264.4110528 | 264.393136 | 264.3845264 | 264.1254192 | 261.1348824 |
| 264.409232 | 264.4128688 | 264.4110528 | 264.394136 | 264.3855264 | 264.1244192 | 261.1368824 |
| 264.408232 | 264.4118688 | 264.4130528 | 264.393136 | 264.3845264 | 264.1274192 | 261.1368824 |
| 264.407232 | 264.4108688 | 264.4120528 | 264.392136 | 264.3855264 | 264.1284192 | 261.1358824 |
| 264.410232 | 264.4138688 | 264.4130528 | 264.394136 | 264.3895264 | 264.1264192 | 261.1378824 |
| 264.407232 | 264.4118688 | 264.4120528 | 264.393136 | 264.3855264 | 264.1224192 | 261.1338824 |
| 264.407232 | 264.4118688 | 264.4100528 | 264.393136 | 264.3855264 | 264.1244192 | 261.1348824 |
| 264.406232 | 264.4098688 | 264.4090528 | 264.390136 | 264.3835264 | 264.1264192 | 261.1338824 |
| 264.407232 | 264.4108688 | 264.4100528 | 264.392136 | 264.3845264 | 264.1274192 | 261.1348824 |
| 264.407232 | 264.4108688 | 264.4120528 | 264.394136 | 264.3845264 | 264.1244192 | 261.1358824 |

|            |             |             |            |             |             |             |
|------------|-------------|-------------|------------|-------------|-------------|-------------|
| 264.405232 | 264.4098688 | 264.4100528 | 264.391136 | 264.3845264 | 264.1234192 | 261.1338824 |
| 264.405232 | 264.4078688 | 264.4080528 | 264.390136 | 264.3815264 | 264.1264192 | 261.1338824 |
| 264.403232 | 264.4098688 | 264.4100528 | 264.390136 | 264.3825264 | 264.1264192 | 261.1358824 |
| 264.405232 | 264.4088688 | 264.4080528 | 264.391136 | 264.3805264 | 264.1254192 | 261.1328824 |
| 264.405232 | 264.4108688 | 264.4100528 | 264.391136 | 264.3835264 | 264.1254192 | 261.1368824 |
| 264.405232 | 264.4098688 | 264.4110528 | 264.392136 | 264.3815264 | 264.1234192 | 261.1358824 |
| 264.405232 | 264.4078688 | 264.4100528 | 264.390136 | 264.3835264 | 264.1234192 | 261.1338824 |
| 264.404232 | 264.4088688 | 264.4070528 | 264.389136 | 264.3825264 | 264.1224192 | 261.1308824 |
| 264.409232 | 264.4128688 | 264.4110528 | 264.395136 | 264.3865264 | 264.1314192 | 261.1378824 |
| 264.406232 | 264.4098688 | 264.4090528 | 264.391136 | 264.3865264 | 264.1264192 | 261.1348824 |
| 264.407232 | 264.4108688 | 264.4090528 | 264.390136 | 264.3845264 | 264.1254192 | 261.1348824 |
| 264.407232 | 264.4088688 | 264.4080528 | 264.393136 | 264.3835264 | 264.1244192 | 261.1318824 |
| 264.407232 | 264.4088688 | 264.4080528 | 264.392136 | 264.3835264 | 264.1264192 | 261.1318824 |
| 264.405232 | 264.4098688 | 264.4080528 | 264.391136 | 264.3845264 | 264.1274192 | 261.1308824 |
| 264.409232 | 264.4098688 | 264.4080528 | 264.391136 | 264.3845264 | 264.1294192 | 261.1328824 |
| 264.409232 | 264.4098688 | 264.4080528 | 264.393136 | 264.3865264 | 264.1284192 | 261.1318824 |
| 264.407232 | 264.4108688 | 264.4070528 | 264.393136 | 264.3845264 | 264.1274192 | 261.1308824 |
| 264.408232 | 264.4118688 | 264.4070528 | 264.393136 | 264.3875264 | 264.1294192 | 261.1318824 |
| 264.409232 | 264.4108688 | 264.4080528 | 264.393136 | 264.3875264 | 264.1294192 | 261.1328824 |
| 264.411232 | 264.4138688 | 264.4090528 | 264.397136 | 264.3895264 | 264.1334192 | 261.1328824 |
| 264.410232 | 264.4128688 | 264.4080528 | 264.395136 | 264.3905264 | 264.1324192 | 261.1308824 |
| 264.409232 | 264.4118688 | 264.4060528 | 264.395136 | 264.3875264 | 264.1314192 | 261.1298824 |
| 264.409232 | 264.4128688 | 264.4080528 | 264.396136 | 264.3895264 | 264.1314192 | 261.1308824 |
| 264.410232 | 264.4148688 | 264.4100528 | 264.397136 | 264.3905264 | 264.1324192 | 261.1308824 |
| 264.409232 | 264.4128688 | 264.4060528 | 264.396136 | 264.3875264 | 264.1314192 | 261.1298824 |
| 264.414232 | 264.4168688 | 264.4090528 | 264.400136 | 264.3925264 | 264.1344192 | 261.1328824 |
| 264.410232 | 264.4138688 | 264.4080528 | 264.397136 | 264.3895264 | 264.1324192 | 261.1318824 |
| 264.410232 | 264.4148688 | 264.4090528 | 264.396136 | 264.3905264 | 264.1314192 | 261.1308824 |
| 264.411232 | 264.4148688 | 264.4090528 | 264.398136 | 264.3905264 | 264.1314192 | 261.1318824 |
| 264.413232 | 264.4158688 | 264.4090528 | 264.399136 | 264.3925264 | 264.1364192 | 261.1318824 |
| 264.413232 | 264.4178688 | 264.4110528 | 264.399136 | 264.3935264 | 264.1354192 | 261.1338824 |
| 264.411232 | 264.4158688 | 264.4090528 | 264.398136 | 264.3905264 | 264.1374192 | 261.1308824 |
| 264.413232 | 264.4178688 | 264.4080528 | 264.401136 | 264.3905264 | 264.1354192 | 261.1338824 |
| 264.415232 | 264.4178688 | 264.4100528 | 264.400136 | 264.3915264 | 264.1374192 | 261.1328824 |
| 264.412232 | 264.4148688 | 264.4090528 | 264.397136 | 264.3885264 | 264.1334192 | 261.1318824 |
| 264.414232 | 264.4168688 | 264.4120528 | 264.399136 | 264.3915264 | 264.1344192 | 261.1348824 |
| 264.415232 | 264.4168688 | 264.4110528 | 264.399136 | 264.3905264 | 264.1354192 | 261.1348824 |
| 264.410232 | 264.4158688 | 264.4100528 | 264.396136 | 264.3895264 | 264.1354192 | 261.1338824 |
| 264.410232 | 264.4138688 | 264.4100528 | 264.394136 | 264.3895264 | 264.1354192 | 261.1318824 |
| 264.410232 | 264.4138688 | 264.4100528 | 264.396136 | 264.3895264 | 264.1344192 | 261.1338824 |
| 264.410232 | 264.4138688 | 264.4100528 | 264.396136 | 264.3875264 | 264.1344192 | 261.1358824 |
| 264.409232 | 264.4148688 | 264.4100528 | 264.395136 | 264.3865264 | 264.1304192 | 261.1358824 |
| 264.407232 | 264.4128688 | 264.4090528 | 264.395136 | 264.3845264 | 264.1294192 | 261.1338824 |
| 264.408232 | 264.4118688 | 264.4110528 | 264.393136 | 264.3855264 | 264.1294192 | 261.1348824 |
| 264.408232 | 264.4138688 | 264.4100528 | 264.394136 | 264.3855264 | 264.1304192 | 261.1378824 |
| 264.407232 | 264.4108688 | 264.4080528 | 264.392136 | 264.3835264 | 264.1284192 | 261.1368824 |
| 264.407232 | 264.4108688 | 264.4100528 | 264.392136 | 264.3855264 | 264.1284192 | 261.1378824 |

|            |             |             |            |             |             |             |
|------------|-------------|-------------|------------|-------------|-------------|-------------|
| 264.406232 | 264.4108688 | 264.4090528 | 264.388136 | 264.3845264 | 264.1294192 | 261.1358824 |
| 264.407232 | 264.4118688 | 264.4120528 | 264.392136 | 264.3855264 | 264.1294192 | 261.1388824 |
| 264.404232 | 264.4108688 | 264.4090528 | 264.390136 | 264.3835264 | 264.1264192 | 261.1368824 |
| 264.401232 | 264.4068688 | 264.4080528 | 264.385136 | 264.3805264 | 264.1234192 | 261.1348824 |
| 264.403232 | 264.4098688 | 264.4100528 | 264.387136 | 264.3825264 | 264.1274192 | 261.1378824 |
| 264.400232 | 264.4068688 | 264.4070528 | 264.384136 | 264.3795264 | 264.1244192 | 261.1358824 |
| 264.402232 | 264.4088688 | 264.4080528 | 264.386136 | 264.3795264 | 264.1244192 | 261.1378824 |
| 264.400232 | 264.4068688 | 264.4070528 | 264.386136 | 264.3795264 | 264.1224192 | 261.1398824 |
| 264.400232 | 264.4048688 | 264.4080528 | 264.384136 | 264.3765264 | 264.1204192 | 261.1358824 |
| 264.397232 | 264.4038688 | 264.4070528 | 264.384136 | 264.3765264 | 264.1194192 | 261.1368824 |
| 264.398232 | 264.4028688 | 264.4080528 | 264.383136 | 264.3765264 | 264.1184192 | 261.1368824 |
| 264.397232 | 264.4058688 | 264.4050528 | 264.384136 | 264.3765264 | 264.1174192 | 261.1368824 |
| 264.396232 | 264.4028688 | 264.4040528 | 264.380136 | 264.3735264 | 264.1144192 | 261.1338824 |
| 264.399232 | 264.4038688 | 264.4070528 | 264.383136 | 264.3755264 | 264.1144192 | 261.1368824 |
| 264.398232 | 264.4028688 | 264.4080528 | 264.385136 | 264.3745264 | 264.1164192 | 261.1368824 |
| 264.396232 | 264.4028688 | 264.4060528 | 264.381136 | 264.3725264 | 264.1144192 | 261.1348824 |
| 264.398232 | 264.4028688 | 264.4060528 | 264.381136 | 264.3725264 | 264.1144192 | 261.1348824 |
| 264.396232 | 264.4028688 | 264.4040528 | 264.382136 | 264.3735264 | 264.1144192 | 261.1338824 |
| 264.396232 | 264.4028688 | 264.4060528 | 264.382136 | 264.3735264 | 264.1164192 | 261.1358824 |
| 264.396232 | 264.4028688 | 264.4060528 | 264.381136 | 264.3725264 | 264.1124192 | 261.1348824 |
| 264.392232 | 264.3998688 | 264.4030528 | 264.379136 | 264.3705264 | 264.1124192 | 261.1308824 |
| 264.396232 | 264.3998688 | 264.4040528 | 264.381136 | 264.3705264 | 264.1104192 | 261.1328824 |
| 264.394232 | 264.4018688 | 264.4060528 | 264.379136 | 264.3705264 | 264.1114192 | 261.1328824 |
| 264.396232 | 264.4018688 | 264.4060528 | 264.383136 | 264.3725264 | 264.1124192 | 261.1348824 |
| 264.393232 | 264.3988688 | 264.4050528 | 264.380136 | 264.3715264 | 264.1104192 | 261.1308824 |
| 264.395232 | 264.3988688 | 264.4050528 | 264.380136 | 264.3715264 | 264.1114192 | 261.1338824 |
| 264.393232 | 264.3998688 | 264.4020528 | 264.377136 | 264.3695264 | 264.1054192 | 261.1298824 |
| 264.393232 | 264.4008688 | 264.4020528 | 264.377136 | 264.3695264 | 264.1094192 | 261.1308824 |
| 264.392232 | 264.3988688 | 264.4030528 | 264.379136 | 264.3665264 | 264.1084192 | 261.1318824 |
| 264.394232 | 264.3998688 | 264.4040528 | 264.380136 | 264.3695264 | 264.1094192 | 261.1328824 |
| 264.393232 | 264.3998688 | 264.4050528 | 264.381136 | 264.3675264 | 264.1124192 | 261.1298824 |
| 264.392232 | 264.3988688 | 264.4020528 | 264.376136 | 264.3685264 | 264.1084192 | 261.1288824 |
| 264.392232 | 264.3988688 | 264.4020528 | 264.376136 | 264.3685264 | 264.1074192 | 261.1288824 |
| 264.392232 | 264.3968688 | 264.4020528 | 264.376136 | 264.3685264 | 264.1104192 | 261.1288824 |
| 264.394232 | 264.3988688 | 264.4040528 | 264.378136 | 264.3705264 | 264.1114192 | 261.1308824 |
| 264.394232 | 264.3968688 | 264.4020528 | 264.378136 | 264.3685264 | 264.1094192 | 261.1288824 |
| 264.391232 | 264.3978688 | 264.4040528 | 264.377136 | 264.3675264 | 264.1114192 | 261.1288824 |
| 264.390232 | 264.3958688 | 264.4030528 | 264.377136 | 264.3665264 | 264.1104192 | 261.1298824 |
| 264.393232 | 264.3978688 | 264.4020528 | 264.379136 | 264.3685264 | 264.1114192 | 261.1278824 |
| 264.397232 | 264.3998688 | 264.4010528 | 264.381136 | 264.3705264 | 264.1084192 | 261.1288824 |
| 264.401232 | 264.4018688 | 264.4030528 | 264.383136 | 264.3745264 | 264.1104192 | 261.1268824 |
| 264.404232 | 264.4048688 | 264.4040528 | 264.387136 | 264.3775264 | 264.1174192 | 261.1288824 |
| 264.404232 | 264.4058688 | 264.4040528 | 264.389136 | 264.3795264 | 264.1184192 | 261.1298824 |
| 264.404232 | 264.4078688 | 264.4040528 | 264.391136 | 264.3805264 | 264.1224192 | 261.1268824 |
| 264.404232 | 264.4058688 | 264.4030528 | 264.391136 | 264.3815264 | 264.1244192 | 261.1288824 |
| 264.406232 | 264.4078688 | 264.4050528 | 264.393136 | 264.3825264 | 264.1264192 | 261.1288824 |
| 264.408232 | 264.4098688 | 264.4020528 | 264.393136 | 264.3845264 | 264.1304192 | 261.1268824 |

|            |             |             |            |             |             |             |
|------------|-------------|-------------|------------|-------------|-------------|-------------|
| 264.410232 | 264.4108688 | 264.4030528 | 264.396136 | 264.3865264 | 264.1304192 | 261.1268824 |
| 264.410232 | 264.4108688 | 264.4030528 | 264.396136 | 264.3865264 | 264.1354192 | 261.1258824 |
| 264.413232 | 264.4138688 | 264.4060528 | 264.399136 | 264.3895264 | 264.1354192 | 261.1268824 |
| 264.411232 | 264.4138688 | 264.4040528 | 264.397136 | 264.3875264 | 264.1354192 | 261.1248824 |
| 264.411232 | 264.4108688 | 264.4050528 | 264.396136 | 264.3875264 | 264.1334192 | 261.1218824 |
| 264.411232 | 264.4138688 | 264.4060528 | 264.399136 | 264.3925264 | 264.1354192 | 261.1268824 |
| 264.411232 | 264.4138688 | 264.4060528 | 264.397136 | 264.3885264 | 264.1324192 | 261.1238824 |
| 264.412232 | 264.4148688 | 264.4050528 | 264.397136 | 264.3905264 | 264.1354192 | 261.1228824 |
| 264.410232 | 264.4148688 | 264.4070528 | 264.400136 | 264.3905264 | 264.1354192 | 261.1268824 |
| 264.416232 | 264.4178688 | 264.4080528 | 264.401136 | 264.3935264 | 264.1354192 | 261.1278824 |
| 264.417232 | 264.4168688 | 264.4090528 | 264.401136 | 264.3935264 | 264.1354192 | 261.1258824 |
| 264.418232 | 264.4198688 | 264.4080528 | 264.403136 | 264.3945264 | 264.1374192 | 261.1258824 |
| 264.417232 | 264.4168688 | 264.4050528 | 264.403136 | 264.3935264 | 264.1374192 | 261.1248824 |
| 264.419232 | 264.4188688 | 264.4070528 | 264.406136 | 264.3955264 | 264.1394192 | 261.1258824 |
| 264.420232 | 264.4218688 | 264.4100528 | 264.407136 | 264.3985264 | 264.1404192 | 261.1278824 |
| 264.420232 | 264.4208688 | 264.4080528 | 264.405136 | 264.3955264 | 264.1394192 | 261.1298824 |
| 264.421232 | 264.4218688 | 264.4130528 | 264.406136 | 264.3945264 | 264.1414192 | 261.1298824 |
| 264.419232 | 264.4198688 | 264.4090528 | 264.403136 | 264.3945264 | 264.1434192 | 261.1288824 |
| 264.416232 | 264.4198688 | 264.4100528 | 264.404136 | 264.3955264 | 264.1424192 | 261.1298824 |
| 264.414232 | 264.4168688 | 264.4080528 | 264.399136 | 264.3905264 | 264.1404192 | 261.1308824 |
| 264.415232 | 264.4188688 | 264.4130528 | 264.402136 | 264.3935264 | 264.1414192 | 261.1328824 |
| 264.415232 | 264.4178688 | 264.4110528 | 264.400136 | 264.3915264 | 264.1354192 | 261.1308824 |
| 264.415232 | 264.4178688 | 264.4110528 | 264.400136 | 264.3895264 | 264.1394192 | 261.1308824 |
| 264.414232 | 264.4168688 | 264.4100528 | 264.398136 | 264.3905264 | 264.1354192 | 261.1358824 |
| 264.411232 | 264.4158688 | 264.4120528 | 264.400136 | 264.3885264 | 264.1354192 | 261.1338824 |
| 264.410232 | 264.4158688 | 264.4110528 | 264.396136 | 264.3905264 | 264.1344192 | 261.1358824 |
| 264.412232 | 264.4138688 | 264.4110528 | 264.394136 | 264.3885264 | 264.1324192 | 261.1348824 |
| 264.408232 | 264.4138688 | 264.4110528 | 264.394136 | 264.3865264 | 264.1324192 | 261.1348824 |
| 264.408232 | 264.4108688 | 264.4110528 | 264.391136 | 264.3835264 | 264.1274192 | 261.1338824 |
| 264.409232 | 264.4118688 | 264.4110528 | 264.394136 | 264.3845264 | 264.1264192 | 261.1378824 |
| 264.409232 | 264.4128688 | 264.4120528 | 264.395136 | 264.3855264 | 264.1294192 | 261.1358824 |
| 264.408232 | 264.4148688 | 264.4110528 | 264.395136 | 264.3855264 | 264.1294192 | 261.1378824 |
| 264.408232 | 264.4098688 | 264.4100528 | 264.392136 | 264.3835264 | 264.1274192 | 261.1358824 |
| 264.407232 | 264.4128688 | 264.4110528 | 264.395136 | 264.3865264 | 264.1284192 | 261.1388824 |
| 264.408232 | 264.4108688 | 264.4080528 | 264.393136 | 264.3835264 | 264.1234192 | 261.1388824 |
| 264.408232 | 264.4108688 | 264.4080528 | 264.392136 | 264.3835264 | 264.1234192 | 261.1388824 |
| 264.406232 | 264.4098688 | 264.4090528 | 264.390136 | 264.3825264 | 264.1264192 | 261.1388824 |
| 264.405232 | 264.4098688 | 264.4090528 | 264.390136 | 264.3825264 | 264.1264192 | 261.1398824 |
| 264.404232 | 264.4108688 | 264.4100528 | 264.392136 | 264.3835264 | 264.1274192 | 261.1408824 |
| 264.405232 | 264.4098688 | 264.4110528 | 264.390136 | 264.3825264 | 264.1284192 | 261.1408824 |
| 264.405232 | 264.4098688 | 264.4100528 | 264.390136 | 264.3825264 | 264.1254192 | 261.1408824 |
| 264.406232 | 264.4098688 | 264.4090528 | 264.390136 | 264.3835264 | 264.1264192 | 261.1398824 |
| 264.406232 | 264.4098688 | 264.4090528 | 264.391136 | 264.3825264 | 264.1264192 | 261.1368824 |
| 264.404232 | 264.4078688 | 264.4080528 | 264.386136 | 264.3785264 | 264.1244192 | 261.1388824 |
| 264.403232 | 264.4098688 | 264.4090528 | 264.389136 | 264.3815264 | 264.1264192 | 261.1398824 |
| 264.402232 | 264.4058688 | 264.4090528 | 264.389136 | 264.3785264 | 264.1224192 | 261.1378824 |
| 264.403232 | 264.4078688 | 264.4080528 | 264.387136 | 264.3805264 | 264.1254192 | 261.1358824 |

|            |             |             |            |             |             |             |
|------------|-------------|-------------|------------|-------------|-------------|-------------|
| 264.405232 | 264.4088688 | 264.4110528 | 264.391136 | 264.3815264 | 264.1264192 | 261.1408824 |
| 264.400232 | 264.4058688 | 264.4080528 | 264.387136 | 264.3785264 | 264.1214192 | 261.1378824 |
| 264.403232 | 264.4068688 | 264.4070528 | 264.386136 | 264.3785264 | 264.1244192 | 261.1388824 |
| 264.398232 | 264.4018688 | 264.4060528 | 264.383136 | 264.3715264 | 264.1204192 | 261.1358824 |
| 264.395232 | 264.4018688 | 264.4070528 | 264.380136 | 264.3715264 | 264.1224192 | 261.1358824 |
| 264.397232 | 264.4018688 | 264.4100528 | 264.383136 | 264.3725264 | 264.1214192 | 261.1378824 |
| 264.393232 | 264.3988688 | 264.4070528 | 264.379136 | 264.3715264 | 264.1184192 | 261.1368824 |
| 264.392232 | 264.3988688 | 264.4050528 | 264.378136 | 264.3675264 | 264.1164192 | 261.1368824 |
| 264.393232 | 264.3988688 | 264.4070528 | 264.377136 | 264.3685264 | 264.1174192 | 261.1368824 |
| 264.391232 | 264.3958688 | 264.4050528 | 264.375136 | 264.3665264 | 264.1114192 | 261.1358824 |
| 264.391232 | 264.3958688 | 264.4040528 | 264.375136 | 264.3665264 | 264.1084192 | 261.1338824 |
| 264.390232 | 264.3958688 | 264.4050528 | 264.375136 | 264.3675264 | 264.1094192 | 261.1338824 |
| 264.390232 | 264.3958688 | 264.4050528 | 264.377136 | 264.3665264 | 264.1094192 | 261.1338824 |
| 264.390232 | 264.3928688 | 264.4030528 | 264.374136 | 264.3645264 | 264.1074192 | 261.1358824 |
| 264.391232 | 264.3958688 | 264.4040528 | 264.376136 | 264.3655264 | 264.1064192 | 261.1348824 |
| 264.390232 | 264.3938688 | 264.4010528 | 264.373136 | 264.3625264 | 264.1034192 | 261.1338824 |
| 264.392232 | 264.3988688 | 264.4070528 | 264.377136 | 264.3665264 | 264.1074192 | 261.1358824 |
| 264.392232 | 264.3948688 | 264.4040528 | 264.376136 | 264.3645264 | 264.1074192 | 261.1328824 |
| 264.391232 | 264.3968688 | 264.4040528 | 264.376136 | 264.3645264 | 264.1074192 | 261.1328824 |
| 264.389232 | 264.3958688 | 264.4020528 | 264.374136 | 264.3655264 | 264.1044192 | 261.1318824 |
| 264.391232 | 264.3958688 | 264.4000528 | 264.376136 | 264.3655264 | 264.1044192 | 261.1298824 |
| 264.389232 | 264.3948688 | 264.4040528 | 264.376136 | 264.3665264 | 264.1064192 | 261.1308824 |
| 264.391232 | 264.3968688 | 264.4040528 | 264.374136 | 264.3665264 | 264.1064192 | 261.1298824 |
| 264.390232 | 264.3968688 | 264.4020528 | 264.377136 | 264.3665264 | 264.1094192 | 261.1338824 |
| 264.391232 | 264.3968688 | 264.4020528 | 264.376136 | 264.3655264 | 264.1084192 | 261.1298824 |
| 264.390232 | 264.3938688 | 264.4010528 | 264.373136 | 264.3625264 | 264.1054192 | 261.1288824 |
| 264.391232 | 264.3958688 | 264.4010528 | 264.375136 | 264.3655264 | 264.1064192 | 261.1288824 |
| 264.389232 | 264.3958688 | 264.4000528 | 264.374136 | 264.3655264 | 264.1064192 | 261.1268824 |
| 264.389232 | 264.3938688 | 264.4000528 | 264.374136 | 264.3615264 | 264.1064192 | 261.1248824 |
| 264.389232 | 264.3938688 | 264.4000528 | 264.374136 | 264.3615264 | 264.1074192 | 261.1248824 |
| 264.389232 | 264.3948688 | 264.3990528 | 264.374136 | 264.3625264 | 264.1064192 | 261.1258824 |
| 264.391232 | 264.3958688 | 264.4020528 | 264.375136 | 264.3665264 | 264.1094192 | 261.1258824 |
| 264.389232 | 264.3948688 | 264.4000528 | 264.376136 | 264.3645264 | 264.1114192 | 261.1238824 |
| 264.390232 | 264.3958688 | 264.4020528 | 264.378136 | 264.3645264 | 264.1114192 | 261.1248824 |
| 264.390232 | 264.3958688 | 264.4010528 | 264.376136 | 264.3645264 | 264.1074192 | 261.1248824 |
| 264.389232 | 264.3948688 | 264.3990528 | 264.374136 | 264.3635264 | 264.1114192 | 261.1248824 |
| 264.388232 | 264.3948688 | 264.4000528 | 264.375136 | 264.3645264 | 264.1084192 | 261.1238824 |
| 264.390232 | 264.3958688 | 264.4000528 | 264.374136 | 264.3655264 | 264.1094192 | 261.1258824 |
| 264.390232 | 264.3958688 | 264.4000528 | 264.375136 | 264.3665264 | 264.1104192 | 261.1248824 |
| 264.386232 | 264.3938688 | 264.3960528 | 264.374136 | 264.3635264 | 264.1064192 | 261.1248824 |
| 264.388232 | 264.3968688 | 264.4020528 | 264.375136 | 264.3635264 | 264.1094192 | 261.1258824 |
| 264.388232 | 264.3928688 | 264.3980528 | 264.373136 | 264.3635264 | 264.1084192 | 261.1238824 |
| 264.388232 | 264.3968688 | 264.4000528 | 264.375136 | 264.3655264 | 264.1104192 | 261.1248824 |
| 264.386232 | 264.3948688 | 264.3980528 | 264.373136 | 264.3605264 | 264.1074192 | 261.1238824 |
| 264.387232 | 264.3948688 | 264.3980528 | 264.373136 | 264.3615264 | 264.1064192 | 261.1238824 |
| 264.388232 | 264.3948688 | 264.4010528 | 264.376136 | 264.3645264 | 264.1094192 | 261.1248824 |
| 264.387232 | 264.3928688 | 264.3990528 | 264.372136 | 264.3625264 | 264.1044192 | 261.1218824 |

|            |             |             |            |             |             |             |
|------------|-------------|-------------|------------|-------------|-------------|-------------|
| 264.387232 | 264.3928688 | 264.4010528 | 264.372136 | 264.3625264 | 264.1064192 | 261.1218824 |
| 264.387232 | 264.3928688 | 264.3990528 | 264.372136 | 264.3615264 | 264.1084192 | 261.1228824 |
| 264.387232 | 264.3948688 | 264.4010528 | 264.376136 | 264.3625264 | 264.1074192 | 261.1248824 |
| 264.387232 | 264.3928688 | 264.3990528 | 264.372136 | 264.3625264 | 264.1054192 | 261.1248824 |
| 264.385232 | 264.3928688 | 264.3970528 | 264.371136 | 264.3615264 | 264.1044192 | 261.1218824 |
| 264.384232 | 264.3928688 | 264.4000528 | 264.372136 | 264.3585264 | 264.1054192 | 261.1208824 |
| 264.381232 | 264.3908688 | 264.3970528 | 264.371136 | 264.3575264 | 264.1024192 | 261.1208824 |
| 264.386232 | 264.3918688 | 264.3980528 | 264.370136 | 264.3585264 | 264.1044192 | 261.1238824 |
| 264.382232 | 264.3908688 | 264.3980528 | 264.370136 | 264.3585264 | 264.1024192 | 261.1238824 |
| 264.385232 | 264.3938688 | 264.4000528 | 264.370136 | 264.3595264 | 264.1054192 | 261.1248824 |
| 264.383232 | 264.3918688 | 264.3990528 | 264.370136 | 264.3575264 | 264.1034192 | 261.1238824 |
| 264.387232 | 264.3928688 | 264.4020528 | 264.371136 | 264.3585264 | 264.1044192 | 261.1258824 |
| 264.383232 | 264.3888688 | 264.3970528 | 264.367136 | 264.3545264 | 264.1024192 | 261.1238824 |
| 264.381232 | 264.3888688 | 264.3950528 | 264.368136 | 264.3565264 | 264.1004192 | 261.1218824 |
| 264.381232 | 264.3868688 | 264.3950528 | 264.366136 | 264.3545264 | 264.1004192 | 261.1238824 |
| 264.382232 | 264.3898688 | 264.4000528 | 264.367136 | 264.3565264 | 264.1014192 | 261.1228824 |
| 264.382232 | 264.3898688 | 264.3980528 | 264.367136 | 264.3555264 | 264.0994192 | 261.1228824 |
| 264.381232 | 264.3878688 | 264.3970528 | 264.367136 | 264.3545264 | 264.1044192 | 261.1228824 |
| 264.381232 | 264.3878688 | 264.3960528 | 264.365136 | 264.3545264 | 264.0984192 | 261.1228824 |
| 264.379232 | 264.3858688 | 264.3970528 | 264.365136 | 264.3545264 | 264.0984192 | 261.1208824 |
| 264.380232 | 264.3888688 | 264.3980528 | 264.366136 | 264.3535264 | 264.0974192 | 261.1198824 |
| 264.380232 | 264.3858688 | 264.3980528 | 264.366136 | 264.3535264 | 264.0954192 | 261.1198824 |
| 264.379232 | 264.3868688 | 264.3970528 | 264.365136 | 264.3525264 | 264.0984192 | 261.1198824 |
| 264.378232 | 264.3878688 | 264.3960528 | 264.365136 | 264.3535264 | 264.0994192 | 261.1208824 |
| 264.380232 | 264.3858688 | 264.3970528 | 264.366136 | 264.3525264 | 264.0964192 | 261.1198824 |
| 264.376232 | 264.3848688 | 264.3950528 | 264.362136 | 264.3515264 | 264.0934192 | 261.1198824 |
| 264.380232 | 264.3838688 | 264.3960528 | 264.362136 | 264.3525264 | 264.0974192 | 261.1178824 |
| 264.379232 | 264.3868688 | 264.3970528 | 264.363136 | 264.3535264 | 264.0984192 | 261.1208824 |
| 264.378232 | 264.3838688 | 264.3930528 | 264.363136 | 264.3535264 | 264.0944192 | 261.1208824 |
| 264.380232 | 264.3868688 | 264.3950528 | 264.363136 | 264.3525264 | 264.0954192 | 261.1208824 |
| 264.377232 | 264.3838688 | 264.3940528 | 264.362136 | 264.3505264 | 264.0924192 | 261.1178824 |
| 264.377232 | 264.3848688 | 264.3950528 | 264.363136 | 264.3495264 | 264.0954192 | 261.1188824 |
| 264.379232 | 264.3858688 | 264.3960528 | 264.362136 | 264.3525264 | 264.0944192 | 261.1198824 |
| 264.377232 | 264.3848688 | 264.3940528 | 264.362136 | 264.3505264 | 264.0964192 | 261.1198824 |
| 264.377232 | 264.3828688 | 264.3940528 | 264.361136 | 264.3505264 | 264.0944192 | 261.1178824 |
| 264.378232 | 264.3838688 | 264.3950528 | 264.362136 | 264.3495264 | 264.0954192 | 261.1178824 |
| 264.375232 | 264.3838688 | 264.3940528 | 264.362136 | 264.3505264 | 264.0964192 | 261.1178824 |
| 264.377232 | 264.3838688 | 264.3950528 | 264.361136 | 264.3505264 | 264.0954192 | 261.1198824 |
| 264.378232 | 264.3838688 | 264.3930528 | 264.363136 | 264.3515264 | 264.0954192 | 261.1168824 |
| 264.377232 | 264.3828688 | 264.3930528 | 264.362136 | 264.3515264 | 264.0964192 | 261.1178824 |
| 264.377232 | 264.3828688 | 264.3940528 | 264.362136 | 264.3525264 | 264.0944192 | 261.1158824 |
| 264.381232 | 264.3848688 | 264.3940528 | 264.365136 | 264.3565264 | 264.0944192 | 261.1168824 |
| 264.389232 | 264.3908688 | 264.3940528 | 264.373136 | 264.3625264 | 264.0994192 | 261.1198824 |
| 264.396232 | 264.3948688 | 264.3970528 | 264.378136 | 264.3695264 | 264.1044192 | 261.1188824 |
| 264.398232 | 264.3978688 | 264.3950528 | 264.383136 | 264.3725264 | 264.1134192 | 261.1178824 |
| 264.400232 | 264.3998688 | 264.3950528 | 264.385136 | 264.3725264 | 264.1224192 | 261.1178824 |
| 264.401232 | 264.3998688 | 264.3950528 | 264.386136 | 264.3745264 | 264.1244192 | 261.1138824 |



|            |             |             |            |             |             |             |
|------------|-------------|-------------|------------|-------------|-------------|-------------|
| 264.401232 | 264.4008688 | 264.3950528 | 264.387136 | 264.3775264 | 264.1304192 | 261.1158824 |
| 264.404232 | 264.4028688 | 264.3960528 | 264.390136 | 264.3775264 | 264.1344192 | 261.1158824 |
| 264.409232 | 264.4058688 | 264.3970528 | 264.395136 | 264.3835264 | 264.1354192 | 261.1148824 |
| 264.411232 | 264.4098688 | 264.3970528 | 264.396136 | 264.3855264 | 264.1394192 | 261.1168824 |
| 264.415232 | 264.4098688 | 264.3970528 | 264.400136 | 264.3885264 | 264.1404192 | 261.1148824 |
| 264.417232 | 264.4158688 | 264.4000528 | 264.401136 | 264.3915264 | 264.1474192 | 261.1168824 |
| 264.419232 | 264.4158688 | 264.3980528 | 264.404136 | 264.3925264 | 264.1464192 | 261.1158824 |
| 264.420232 | 264.4168688 | 264.3990528 | 264.407136 | 264.3935264 | 264.1494192 | 261.1158824 |
| 264.421232 | 264.4188688 | 264.4000528 | 264.405136 | 264.3955264 | 264.1494192 | 261.1138824 |
| 264.422232 | 264.4198688 | 264.4020528 | 264.410136 | 264.3965264 | 264.1504192 | 261.1138824 |
| 264.424232 | 264.4218688 | 264.4020528 | 264.408136 | 264.3995264 | 264.1524192 | 261.1138824 |
| 264.426232 | 264.4238688 | 264.4040528 | 264.410136 | 264.4025264 | 264.1564192 | 261.1158824 |
| 264.425232 | 264.4228688 | 264.4020528 | 264.412136 | 264.4005264 | 264.1544192 | 261.1128824 |
| 264.424232 | 264.4238688 | 264.4020528 | 264.410136 | 264.4005264 | 264.1524192 | 261.1148824 |
| 264.425232 | 264.4238688 | 264.4050528 | 264.411136 | 264.3995264 | 264.1554192 | 261.1138824 |
| 264.425232 | 264.4218688 | 264.4030528 | 264.410136 | 264.3995264 | 264.1554192 | 261.1138824 |
| 264.426232 | 264.4248688 | 264.4070528 | 264.412136 | 264.4015264 | 264.1534192 | 261.1178824 |
| 264.426232 | 264.4268688 | 264.4080528 | 264.412136 | 264.4025264 | 264.1564192 | 261.1208824 |
| 264.422232 | 264.4258688 | 264.4070528 | 264.408136 | 264.3985264 | 264.1524192 | 261.1198824 |
| 264.416232 | 264.4208688 | 264.4070528 | 264.403136 | 264.3935264 | 264.1504192 | 261.1188824 |
| 264.416232 | 264.4188688 | 264.4070528 | 264.401136 | 264.3895264 | 264.1474192 | 261.1228824 |
| 264.410232 | 264.4158688 | 264.4060528 | 264.396136 | 264.3865264 | 264.1414192 | 261.1228824 |
| 264.405232 | 264.4148688 | 264.4070528 | 264.394136 | 264.3855264 | 264.1394192 | 261.1258824 |
| 264.401232 | 264.4098688 | 264.4070528 | 264.392136 | 264.3815264 | 264.1354192 | 261.1268824 |
| 264.400232 | 264.4078688 | 264.4080528 | 264.388136 | 264.3805264 | 264.1304192 | 261.1308824 |
| 264.398232 | 264.4058688 | 264.4050528 | 264.385136 | 264.3765264 | 264.1244192 | 261.1308824 |
| 264.395232 | 264.4048688 | 264.4040528 | 264.384136 | 264.3765264 | 264.1204192 | 261.1338824 |
| 264.396232 | 264.4018688 | 264.4040528 | 264.384136 | 264.3735264 | 264.1154192 | 261.1358824 |
| 264.397232 | 264.4038688 | 264.4060528 | 264.383136 | 264.3735264 | 264.1134192 | 261.1358824 |
| 264.393232 | 264.3998688 | 264.4040528 | 264.378136 | 264.3715264 | 264.1124192 | 261.1368824 |
| 264.394232 | 264.3998688 | 264.4050528 | 264.381136 | 264.3705264 | 264.1114192 | 261.1398824 |
| 264.395232 | 264.4008688 | 264.4050528 | 264.382136 | 264.3715264 | 264.1114192 | 261.1398824 |
| 264.394232 | 264.3998688 | 264.4030528 | 264.381136 | 264.3695264 | 264.1054192 | 261.1398824 |
| 264.396232 | 264.3988688 | 264.4020528 | 264.382136 | 264.3725264 | 264.1044192 | 261.1388824 |
| 264.394232 | 264.3988688 | 264.4020528 | 264.381136 | 264.3725264 | 264.1094192 | 261.1388824 |
| 264.395232 | 264.3988688 | 264.4010528 | 264.380136 | 264.3705264 | 264.1134192 | 261.1388824 |
| 264.395232 | 264.3998688 | 264.4030528 | 264.379136 | 264.3715264 | 264.1144192 | 261.1398824 |
| 264.394232 | 264.3998688 | 264.4040528 | 264.381136 | 264.3715264 | 264.1154192 | 261.1398824 |
| 264.394232 | 264.3998688 | 264.4020528 | 264.380136 | 264.3705264 | 264.1154192 | 261.1408824 |
| 264.393232 | 264.3978688 | 264.4010528 | 264.380136 | 264.3705264 | 264.1144192 | 261.1388824 |
| 264.393232 | 264.3978688 | 264.4000528 | 264.379136 | 264.3685264 | 264.1124192 | 261.1378824 |
| 264.394232 | 264.3988688 | 264.4020528 | 264.379136 | 264.3715264 | 264.1154192 | 261.1398824 |
| 264.392232 | 264.3958688 | 264.3980528 | 264.376136 | 264.3665264 | 264.1154192 | 261.1388824 |
| 264.389232 | 264.3958688 | 264.4010528 | 264.374136 | 264.3655264 | 264.1144192 | 261.1378824 |
| 264.388232 | 264.3938688 | 264.4010528 | 264.372136 | 264.3635264 | 264.1124192 | 261.1368824 |
| 264.386232 | 264.3928688 | 264.4000528 | 264.369136 | 264.3605264 | 264.1094192 | 261.1328824 |
| 264.385232 | 264.3918688 | 264.4010528 | 264.374136 | 264.3615264 | 264.1114192 | 261.1358824 |

|            |             |             |            |             |             |             |
|------------|-------------|-------------|------------|-------------|-------------|-------------|
| 264.385232 | 264.3918688 | 264.3990528 | 264.370136 | 264.3595264 | 264.1084192 | 261.1348824 |
| 264.383232 | 264.3888688 | 264.3970528 | 264.367136 | 264.3595264 | 264.1024192 | 261.1328824 |
| 264.381232 | 264.3878688 | 264.3970528 | 264.367136 | 264.3565264 | 264.1014192 | 261.1278824 |
| 264.381232 | 264.3878688 | 264.3950528 | 264.366136 | 264.3565264 | 264.1014192 | 261.1298824 |
| 264.381232 | 264.3858688 | 264.3950528 | 264.367136 | 264.3565264 | 264.1004192 | 261.1298824 |
| 264.384232 | 264.3898688 | 264.3980528 | 264.368136 | 264.3585264 | 264.0994192 | 261.1308824 |
| 264.381232 | 264.3868688 | 264.3950528 | 264.365136 | 264.3575264 | 264.1004192 | 261.1258824 |
| 264.380232 | 264.3868688 | 264.3960528 | 264.367136 | 264.3575264 | 264.0994192 | 261.1288824 |
| 264.380232 | 264.3868688 | 264.3960528 | 264.365136 | 264.3575264 | 264.1014192 | 261.1288824 |
| 264.380232 | 264.3858688 | 264.3940528 | 264.363136 | 264.3555264 | 264.0984192 | 261.1278824 |
| 264.381232 | 264.3868688 | 264.3950528 | 264.366136 | 264.3545264 | 264.1004192 | 261.1288824 |
| 264.378232 | 264.3838688 | 264.3940528 | 264.365136 | 264.3535264 | 264.0974192 | 261.1248824 |
| 264.379232 | 264.3838688 | 264.3930528 | 264.364136 | 264.3545264 | 264.0984192 | 261.1288824 |
| 264.379232 | 264.3828688 | 264.3930528 | 264.364136 | 264.3545264 | 264.0984192 | 261.1248824 |
| 264.378232 | 264.3848688 | 264.3930528 | 264.364136 | 264.3525264 | 264.1014192 | 261.1258824 |
| 264.380232 | 264.3848688 | 264.3920528 | 264.365136 | 264.3555264 | 264.1014192 | 261.1258824 |
| 264.375232 | 264.3818688 | 264.3910528 | 264.362136 | 264.3525264 | 264.0964192 | 261.1228824 |
| 264.378232 | 264.3808688 | 264.3920528 | 264.362136 | 264.3535264 | 264.1014192 | 261.1248824 |
| 264.375232 | 264.3798688 | 264.3910528 | 264.362136 | 264.3505264 | 264.0984192 | 261.1248824 |
| 264.377232 | 264.3818688 | 264.3910528 | 264.362136 | 264.3525264 | 264.0994192 | 261.1228824 |
| 264.376232 | 264.3808688 | 264.3900528 | 264.361136 | 264.3505264 | 264.0974192 | 261.1228824 |
| 264.378232 | 264.3808688 | 264.3900528 | 264.361136 | 264.3505264 | 264.0974192 | 261.1208824 |
| 264.378232 | 264.3808688 | 264.3940528 | 264.364136 | 264.3535264 | 264.0994192 | 261.1228824 |
| 264.379232 | 264.3828688 | 264.3920528 | 264.363136 | 264.3535264 | 264.1004192 | 261.1228824 |
| 264.378232 | 264.3808688 | 264.3900528 | 264.361136 | 264.3505264 | 264.0974192 | 261.1178824 |
| 264.374232 | 264.3808688 | 264.3920528 | 264.361136 | 264.3505264 | 264.0954192 | 261.1198824 |
| 264.374232 | 264.3798688 | 264.3890528 | 264.359136 | 264.3505264 | 264.0994192 | 261.1178824 |
| 264.374232 | 264.3798688 | 264.3880528 | 264.360136 | 264.3485264 | 264.0974192 | 261.1178824 |
| 264.375232 | 264.3828688 | 264.3900528 | 264.362136 | 264.3515264 | 264.0964192 | 261.1178824 |
| 264.377232 | 264.3818688 | 264.3910528 | 264.361136 | 264.3525264 | 264.1004192 | 261.1188824 |
| 264.374232 | 264.3798688 | 264.3900528 | 264.360136 | 264.3485264 | 264.0974192 | 261.1178824 |
| 264.375232 | 264.3808688 | 264.3890528 | 264.360136 | 264.3515264 | 264.0984192 | 261.1158824 |
| 264.376232 | 264.3818688 | 264.3900528 | 264.361136 | 264.3505264 | 264.0994192 | 261.1168824 |
| 264.377232 | 264.3818688 | 264.3900528 | 264.361136 | 264.3505264 | 264.1004192 | 261.1168824 |
| 264.376232 | 264.3798688 | 264.3900528 | 264.361136 | 264.3505264 | 264.0984192 | 261.1168824 |
| 264.377232 | 264.3828688 | 264.3910528 | 264.362136 | 264.3515264 | 264.1014192 | 261.1158824 |
| 264.375232 | 264.3818688 | 264.3890528 | 264.360136 | 264.3495264 | 264.0994192 | 261.1148824 |
| 264.374232 | 264.3808688 | 264.3890528 | 264.359136 | 264.3495264 | 264.0994192 | 261.1148824 |
| 264.377232 | 264.3808688 | 264.3900528 | 264.360136 | 264.3505264 | 264.1004192 | 261.1168824 |
| 264.374232 | 264.3798688 | 264.3890528 | 264.358136 | 264.3475264 | 264.0994192 | 261.1158824 |
| 264.375232 | 264.3798688 | 264.3880528 | 264.360136 | 264.3485264 | 264.0984192 | 261.1168824 |
| 264.373232 | 264.3788688 | 264.3860528 | 264.358136 | 264.3485264 | 264.1004192 | 261.1148824 |
| 264.375232 | 264.3808688 | 264.3880528 | 264.359136 | 264.3485264 | 264.0994192 | 261.1138824 |
| 264.375232 | 264.3788688 | 264.3880528 | 264.358136 | 264.3485264 | 264.0984192 | 261.1118824 |
| 264.373232 | 264.3788688 | 264.3880528 | 264.358136 | 264.3465264 | 264.0964192 | 261.1138824 |
| 264.373232 | 264.3788688 | 264.3860528 | 264.358136 | 264.3485264 | 264.0984192 | 261.1138824 |
| 264.371232 | 264.3788688 | 264.3850528 | 264.357136 | 264.3465264 | 264.0954192 | 261.1118824 |

|            |             |             |            |             |             |             |
|------------|-------------|-------------|------------|-------------|-------------|-------------|
| 264.372232 | 264.3788688 | 264.3890528 | 264.359136 | 264.3495264 | 264.0984192 | 261.1128824 |
| 264.373232 | 264.3788688 | 264.3870528 | 264.357136 | 264.3475264 | 264.0964192 | 261.1128824 |
| 264.371232 | 264.3798688 | 264.3880528 | 264.360136 | 264.3465264 | 264.0994192 | 261.1138824 |
| 264.372232 | 264.3808688 | 264.3890528 | 264.358136 | 264.3475264 | 264.0994192 | 261.1138824 |
| 264.372232 | 264.3798688 | 264.3870528 | 264.358136 | 264.3465264 | 264.0974192 | 261.1138824 |
| 264.373232 | 264.3798688 | 264.3880528 | 264.358136 | 264.3455264 | 264.0954192 | 261.1118824 |
| 264.375232 | 264.3788688 | 264.3880528 | 264.360136 | 264.3485264 | 264.0974192 | 261.1158824 |
| 264.373232 | 264.3778688 | 264.3860528 | 264.356136 | 264.3455264 | 264.0964192 | 261.1148824 |
| 264.373232 | 264.3788688 | 264.3880528 | 264.357136 | 264.3455264 | 264.0964192 | 261.1128824 |
| 264.372232 | 264.3768688 | 264.3870528 | 264.357136 | 264.3465264 | 264.0974192 | 261.1148824 |
| 264.371232 | 264.3788688 | 264.3870528 | 264.357136 | 264.3465264 | 264.0944192 | 261.1148824 |
| 264.372232 | 264.3788688 | 264.3870528 | 264.357136 | 264.3465264 | 264.0934192 | 261.1148824 |
| 264.371232 | 264.3778688 | 264.3860528 | 264.356136 | 264.3445264 | 264.0924192 | 261.1118824 |
| 264.370232 | 264.3768688 | 264.3870528 | 264.357136 | 264.3445264 | 264.0954192 | 261.1108824 |
| 264.372232 | 264.3788688 | 264.3870528 | 264.355136 | 264.3455264 | 264.0964192 | 261.1128824 |
| 264.370232 | 264.3768688 | 264.3870528 | 264.353136 | 264.3445264 | 264.0964192 | 261.1138824 |
| 264.368232 | 264.3758688 | 264.3830528 | 264.353136 | 264.3445264 | 264.0934192 | 261.1128824 |
| 264.371232 | 264.3768688 | 264.3840528 | 264.355136 | 264.3455264 | 264.0944192 | 261.1128824 |
| 264.370232 | 264.3768688 | 264.3840528 | 264.355136 | 264.3435264 | 264.0924192 | 261.1128824 |
| 264.369232 | 264.3768688 | 264.3860528 | 264.356136 | 264.3455264 | 264.0924192 | 261.1118824 |
| 264.370232 | 264.3768688 | 264.3850528 | 264.356136 | 264.3465264 | 264.0934192 | 261.1118824 |
| 264.370232 | 264.3768688 | 264.3870528 | 264.354136 | 264.3445264 | 264.0934192 | 261.1138824 |
| 264.372232 | 264.3758688 | 264.3870528 | 264.356136 | 264.3475264 | 264.0964192 | 261.1118824 |
| 264.372232 | 264.3778688 | 264.3850528 | 264.354136 | 264.3445264 | 264.0944192 | 261.1118824 |
| 264.372232 | 264.3758688 | 264.3850528 | 264.356136 | 264.3445264 | 264.0914192 | 261.1128824 |
| 264.370232 | 264.3748688 | 264.3870528 | 264.354136 | 264.3425264 | 264.0934192 | 261.1128824 |
| 264.370232 | 264.3748688 | 264.3850528 | 264.354136 | 264.3445264 | 264.0934192 | 261.1128824 |
| 264.369232 | 264.3758688 | 264.3860528 | 264.354136 | 264.3445264 | 264.0944192 | 261.1108824 |
| 264.369232 | 264.3748688 | 264.3830528 | 264.352136 | 264.3445264 | 264.0894192 | 261.1108824 |
| 264.371232 | 264.3758688 | 264.3860528 | 264.354136 | 264.3455264 | 264.0924192 | 261.1128824 |
| 264.367232 | 264.3748688 | 264.3840528 | 264.352136 | 264.3445264 | 264.0894192 | 261.1108824 |
| 264.369232 | 264.3748688 | 264.3840528 | 264.354136 | 264.3435264 | 264.0904192 | 261.1108824 |
| 264.367232 | 264.3758688 | 264.3840528 | 264.352136 | 264.3435264 | 264.0914192 | 261.1128824 |
| 264.365232 | 264.3728688 | 264.3820528 | 264.350136 | 264.3405264 | 264.0904192 | 261.1098824 |
| 264.365232 | 264.3728688 | 264.3820528 | 264.352136 | 264.3425264 | 264.0884192 | 261.1098824 |
| 264.367232 | 264.3738688 | 264.3840528 | 264.350136 | 264.3415264 | 264.0884192 | 261.1088824 |
| 264.368232 | 264.3728688 | 264.3850528 | 264.353136 | 264.3415264 | 264.0894192 | 261.1108824 |
| 264.367232 | 264.3728688 | 264.3840528 | 264.350136 | 264.3405264 | 264.0904192 | 261.1088824 |
| 264.367232 | 264.3728688 | 264.3840528 | 264.350136 | 264.3425264 | 264.0884192 | 261.1078824 |
| 264.365232 | 264.3708688 | 264.3840528 | 264.350136 | 264.3405264 | 264.0864192 | 261.1108824 |
| 264.365232 | 264.3728688 | 264.3840528 | 264.349136 | 264.3405264 | 264.0884192 | 261.1088824 |
| 264.365232 | 264.3698688 | 264.3820528 | 264.347136 | 264.3385264 | 264.0834192 | 261.1078824 |
| 264.365232 | 264.3708688 | 264.3820528 | 264.350136 | 264.3405264 | 264.0864192 | 261.1078824 |
| 264.363232 | 264.3708688 | 264.3820528 | 264.349136 | 264.3385264 | 264.0834192 | 261.1088824 |
| 264.365232 | 264.3708688 | 264.3840528 | 264.348136 | 264.3385264 | 264.0844192 | 261.1078824 |
| 264.366232 | 264.3728688 | 264.3830528 | 264.348136 | 264.3395264 | 264.0864192 | 261.1088824 |
| 264.363232 | 264.3708688 | 264.3810528 | 264.349136 | 264.3385264 | 264.0854192 | 261.1078824 |

|            |             |             |            |             |             |             |
|------------|-------------|-------------|------------|-------------|-------------|-------------|
| 264.366232 | 264.3718688 | 264.3830528 | 264.350136 | 264.3385264 | 264.0854192 | 261.1078824 |
| 264.363232 | 264.3698688 | 264.3820528 | 264.347136 | 264.3375264 | 264.0824192 | 261.1068824 |
| 264.366232 | 264.3718688 | 264.3830528 | 264.347136 | 264.3395264 | 264.0874192 | 261.1088824 |
| 264.363232 | 264.3688688 | 264.3780528 | 264.346136 | 264.3365264 | 264.0844192 | 261.1048824 |
| 264.364232 | 264.3718688 | 264.3810528 | 264.348136 | 264.3375264 | 264.0874192 | 261.1088824 |
| 264.365232 | 264.3708688 | 264.3820528 | 264.348136 | 264.3385264 | 264.0884192 | 261.1078824 |
| 264.364232 | 264.3728688 | 264.3810528 | 264.347136 | 264.3375264 | 264.0874192 | 261.1078824 |
| 264.366232 | 264.3718688 | 264.3810528 | 264.349136 | 264.3385264 | 264.0894192 | 261.1068824 |
| 264.366232 | 264.3688688 | 264.3790528 | 264.348136 | 264.3375264 | 264.0834192 | 261.1048824 |
| 264.366232 | 264.3698688 | 264.3810528 | 264.347136 | 264.3375264 | 264.0874192 | 261.1028824 |
| 264.364232 | 264.3698688 | 264.3810528 | 264.349136 | 264.3375264 | 264.0904192 | 261.1048824 |
| 264.364232 | 264.3698688 | 264.3810528 | 264.345136 | 264.3355264 | 264.0874192 | 261.1048824 |
| 264.364232 | 264.3698688 | 264.3830528 | 264.349136 | 264.3375264 | 264.0884192 | 261.1068824 |
| 264.362232 | 264.3688688 | 264.3810528 | 264.346136 | 264.3355264 | 264.0874192 | 261.1038824 |
| 264.364232 | 264.3698688 | 264.3810528 | 264.345136 | 264.3355264 | 264.0884192 | 261.1068824 |
| 264.363232 | 264.3678688 | 264.3790528 | 264.345136 | 264.3355264 | 264.0844192 | 261.1048824 |
| 264.361232 | 264.3678688 | 264.3780528 | 264.345136 | 264.3345264 | 264.0844192 | 261.1048824 |
| 264.361232 | 264.3678688 | 264.3800528 | 264.343136 | 264.3365264 | 264.0874192 | 261.1038824 |
| 264.362232 | 264.3698688 | 264.3800528 | 264.345136 | 264.3345264 | 264.0824192 | 261.1038824 |
| 264.361232 | 264.3648688 | 264.3780528 | 264.343136 | 264.3315264 | 264.0784192 | 261.1038824 |
| 264.360232 | 264.3678688 | 264.3770528 | 264.344136 | 264.3325264 | 264.0814192 | 261.1038824 |
| 264.361232 | 264.3668688 | 264.3780528 | 264.342136 | 264.3315264 | 264.0804192 | 261.1018824 |
| 264.360232 | 264.3668688 | 264.3780528 | 264.343136 | 264.3315264 | 264.0814192 | 261.1028824 |
| 264.359232 | 264.3648688 | 264.3780528 | 264.343136 | 264.3325264 | 264.0804192 | 261.1028824 |
| 264.359232 | 264.3668688 | 264.3770528 | 264.343136 | 264.3335264 | 264.0804192 | 261.1028824 |
| 264.359232 | 264.3648688 | 264.3770528 | 264.341136 | 264.3305264 | 264.0804192 | 261.1008824 |
| 264.360232 | 264.3658688 | 264.3780528 | 264.343136 | 264.3315264 | 264.0804192 | 261.1038824 |
| 264.360232 | 264.3658688 | 264.3770528 | 264.342136 | 264.3325264 | 264.0814192 | 261.1038824 |
| 264.358232 | 264.3658688 | 264.3760528 | 264.342136 | 264.3315264 | 264.0794192 | 261.1038824 |
| 264.360232 | 264.3638688 | 264.3750528 | 264.344136 | 264.3305264 | 264.0794192 | 261.1028824 |
| 264.360232 | 264.3658688 | 264.3770528 | 264.342136 | 264.3305264 | 264.0824192 | 261.1028824 |
| 264.360232 | 264.3638688 | 264.3770528 | 264.340136 | 264.3295264 | 264.0794192 | 261.1018824 |
| 264.359232 | 264.3668688 | 264.3780528 | 264.342136 | 264.3315264 | 264.0824192 | 261.1028824 |
| 264.359232 | 264.3658688 | 264.3750528 | 264.340136 | 264.3305264 | 264.0804192 | 261.1008824 |
| 264.359232 | 264.3668688 | 264.3770528 | 264.343136 | 264.3325264 | 264.0824192 | 261.1038824 |
| 264.358232 | 264.3678688 | 264.3790528 | 264.343136 | 264.3295264 | 264.0834192 | 261.1018824 |
| 264.357232 | 264.3648688 | 264.3770528 | 264.341136 | 264.3315264 | 264.0804192 | 261.1038824 |
| 264.359232 | 264.3658688 | 264.3770528 | 264.342136 | 264.3325264 | 264.0824192 | 261.1018824 |
| 264.356232 | 264.3638688 | 264.3760528 | 264.341136 | 264.3295264 | 264.0794192 | 261.1008824 |
| 264.356232 | 264.3648688 | 264.3770528 | 264.341136 | 264.3315264 | 264.0814192 | 261.1008824 |
| 264.358232 | 264.3648688 | 264.3770528 | 264.341136 | 264.3315264 | 264.0814192 | 261.1018824 |
| 264.358232 | 264.3668688 | 264.3760528 | 264.340136 | 264.3315264 | 264.0794192 | 261.1008824 |
| 264.356232 | 264.3648688 | 264.3780528 | 264.341136 | 264.3315264 | 264.0784192 | 261.1008824 |
| 264.357232 | 264.3658688 | 264.3760528 | 264.340136 | 264.3305264 | 264.0804192 | 261.1008824 |
| 264.356232 | 264.3638688 | 264.3760528 | 264.341136 | 264.3315264 | 264.0794192 | 261.1028824 |
| 264.357232 | 264.3618688 | 264.3750528 | 264.340136 | 264.3305264 | 264.0784192 | 261.0978824 |
| 264.356232 | 264.3648688 | 264.3760528 | 264.341136 | 264.3315264 | 264.0794192 | 261.1028824 |

|            |             |             |            |             |             |             |
|------------|-------------|-------------|------------|-------------|-------------|-------------|
| 264.355232 | 264.3638688 | 264.3740528 | 264.341136 | 264.3285264 | 264.0794192 | 261.0988824 |
| 264.355232 | 264.3638688 | 264.3750528 | 264.342136 | 264.3285264 | 264.0804192 | 261.0998824 |
| 264.355232 | 264.3638688 | 264.3730528 | 264.338136 | 264.3275264 | 264.0774192 | 261.0998824 |
| 264.357232 | 264.3638688 | 264.3750528 | 264.340136 | 264.3285264 | 264.0804192 | 261.1008824 |
| 264.356232 | 264.3638688 | 264.3740528 | 264.341136 | 264.3295264 | 264.0814192 | 261.0988824 |
| 264.358232 | 264.3638688 | 264.3760528 | 264.341136 | 264.3315264 | 264.0814192 | 261.1008824 |
| 264.355232 | 264.3638688 | 264.3740528 | 264.338136 | 264.3285264 | 264.0794192 | 261.1008824 |
| 264.356232 | 264.3618688 | 264.3740528 | 264.340136 | 264.3295264 | 264.0794192 | 261.0988824 |
| 264.354232 | 264.3628688 | 264.3730528 | 264.339136 | 264.3275264 | 264.0804192 | 261.0968824 |
| 264.356232 | 264.3628688 | 264.3730528 | 264.339136 | 264.3295264 | 264.0794192 | 261.0998824 |
| 264.355232 | 264.3608688 | 264.3730528 | 264.340136 | 264.3285264 | 264.0784192 | 261.1008824 |
| 264.353232 | 264.3618688 | 264.3730528 | 264.339136 | 264.3285264 | 264.0804192 | 261.0998824 |
| 264.353232 | 264.3618688 | 264.3740528 | 264.340136 | 264.3285264 | 264.0804192 | 261.0978824 |
| 264.355232 | 264.3618688 | 264.3730528 | 264.340136 | 264.3305264 | 264.0804192 | 261.0998824 |
| 264.355232 | 264.3618688 | 264.3730528 | 264.338136 | 264.3305264 | 264.0784192 | 261.0978824 |
| 264.354232 | 264.3608688 | 264.3720528 | 264.337136 | 264.3275264 | 264.0794192 | 261.0948824 |
| 264.358232 | 264.3638688 | 264.3740528 | 264.340136 | 264.3295264 | 264.0814192 | 261.0998824 |
| 264.355232 | 264.3628688 | 264.3750528 | 264.340136 | 264.3305264 | 264.0824192 | 261.0978824 |
| 264.354232 | 264.3608688 | 264.3720528 | 264.337136 | 264.3275264 | 264.0814192 | 261.0948824 |
| 264.353232 | 264.3608688 | 264.3720528 | 264.338136 | 264.3295264 | 264.0814192 | 261.0958824 |
| 264.353232 | 264.3598688 | 264.3710528 | 264.339136 | 264.3275264 | 264.0784192 | 261.0968824 |
| 264.349232 | 264.3578688 | 264.3710528 | 264.336136 | 264.3265264 | 264.0764192 | 261.0938824 |
| 264.353232 | 264.3598688 | 264.3710528 | 264.338136 | 264.3285264 | 264.0784192 | 261.0958824 |
| 264.353232 | 264.3598688 | 264.3720528 | 264.339136 | 264.3275264 | 264.0814192 | 261.0958824 |
| 264.352232 | 264.3588688 | 264.3720528 | 264.337136 | 264.3255264 | 264.0814192 | 261.0948824 |
| 264.352232 | 264.3578688 | 264.3700528 | 264.336136 | 264.3235264 | 264.0794192 | 261.0968824 |
| 264.354232 | 264.3608688 | 264.3720528 | 264.339136 | 264.3275264 | 264.0804192 | 261.0968824 |
| 264.353232 | 264.3618688 | 264.3730528 | 264.339136 | 264.3265264 | 264.0824192 | 261.0968824 |
| 264.353232 | 264.3608688 | 264.3710528 | 264.339136 | 264.3285264 | 264.0804192 | 261.0968824 |
| 264.351232 | 264.3608688 | 264.3710528 | 264.339136 | 264.3265264 | 264.0804192 | 261.0968824 |
| 264.352232 | 264.3588688 | 264.3720528 | 264.337136 | 264.3275264 | 264.0794192 | 261.0948824 |
| 264.352232 | 264.3588688 | 264.3700528 | 264.336136 | 264.3275264 | 264.0814192 | 261.0948824 |
| 264.353232 | 264.3608688 | 264.3710528 | 264.337136 | 264.3265264 | 264.0804192 | 261.0968824 |
| 264.350232 | 264.3578688 | 264.3700528 | 264.336136 | 264.3235264 | 264.0794192 | 261.0938824 |
| 264.354232 | 264.3578688 | 264.3680528 | 264.337136 | 264.3255264 | 264.0774192 | 261.0938824 |
| 264.353232 | 264.3608688 | 264.3690528 | 264.339136 | 264.3265264 | 264.0804192 | 261.0958824 |
| 264.352232 | 264.3588688 | 264.3700528 | 264.337136 | 264.3275264 | 264.0804192 | 261.0938824 |
| 264.354232 | 264.3608688 | 264.3720528 | 264.339136 | 264.3275264 | 264.0804192 | 261.0948824 |
| 264.354232 | 264.3588688 | 264.3680528 | 264.337136 | 264.3275264 | 264.0794192 | 261.0988824 |
| 264.354232 | 264.3608688 | 264.3700528 | 264.339136 | 264.3275264 | 264.0794192 | 261.0978824 |
| 264.354232 | 264.3578688 | 264.3700528 | 264.337136 | 264.3255264 | 264.0804192 | 261.0968824 |
| 264.353232 | 264.3618688 | 264.3710528 | 264.338136 | 264.3285264 | 264.0814192 | 261.0998824 |
| 264.355232 | 264.3598688 | 264.3710528 | 264.338136 | 264.3265264 | 264.0784192 | 261.0958824 |
| 264.356232 | 264.3618688 | 264.3710528 | 264.341136 | 264.3295264 | 264.0834192 | 261.0978824 |
| 264.353232 | 264.3598688 | 264.3710528 | 264.338136 | 264.3265264 | 264.0804192 | 261.0958824 |
| 264.356232 | 264.3618688 | 264.3720528 | 264.340136 | 264.3275264 | 264.0814192 | 261.0958824 |
| 264.355232 | 264.3618688 | 264.3710528 | 264.338136 | 264.3265264 | 264.0814192 | 261.0978824 |

|            |             |             |            |             |             |             |
|------------|-------------|-------------|------------|-------------|-------------|-------------|
| 264.355232 | 264.3608688 | 264.3730528 | 264.339136 | 264.3285264 | 264.0824192 | 261.0958824 |
| 264.355232 | 264.3618688 | 264.3730528 | 264.340136 | 264.3285264 | 264.0804192 | 261.0978824 |
| 264.354232 | 264.3598688 | 264.3680528 | 264.337136 | 264.3235264 | 264.0814192 | 261.0948824 |
| 264.353232 | 264.3608688 | 264.3700528 | 264.339136 | 264.3265264 | 264.0824192 | 261.0968824 |
| 264.355232 | 264.3608688 | 264.3700528 | 264.337136 | 264.3265264 | 264.0784192 | 261.0968824 |
| 264.353232 | 264.3588688 | 264.3700528 | 264.336136 | 264.3255264 | 264.0784192 | 261.0948824 |
| 264.353232 | 264.3578688 | 264.3660528 | 264.337136 | 264.3255264 | 264.0774192 | 261.0928824 |
| 264.355232 | 264.3608688 | 264.3690528 | 264.339136 | 264.3265264 | 264.0784192 | 261.0958824 |
| 264.353232 | 264.3588688 | 264.3690528 | 264.337136 | 264.3265264 | 264.0804192 | 261.0948824 |
| 264.350232 | 264.3558688 | 264.3700528 | 264.337136 | 264.3255264 | 264.0784192 | 261.0948824 |
| 264.352232 | 264.3578688 | 264.3700528 | 264.337136 | 264.3265264 | 264.0784192 | 261.0948824 |
| 264.353232 | 264.3608688 | 264.3690528 | 264.339136 | 264.3245264 | 264.0804192 | 261.0958824 |
| 264.352232 | 264.3588688 | 264.3700528 | 264.337136 | 264.3255264 | 264.0784192 | 261.0948824 |
| 264.350232 | 264.3578688 | 264.3680528 | 264.337136 | 264.3255264 | 264.0794192 | 261.0938824 |
| 264.352232 | 264.3558688 | 264.3680528 | 264.336136 | 264.3235264 | 264.0774192 | 261.0938824 |
| 264.352232 | 264.3578688 | 264.3680528 | 264.336136 | 264.3255264 | 264.0794192 | 261.0948824 |
| 264.352232 | 264.3588688 | 264.3680528 | 264.337136 | 264.3255264 | 264.0804192 | 261.0948824 |
| 264.350232 | 264.3558688 | 264.3670528 | 264.336136 | 264.3255264 | 264.0774192 | 261.0938824 |
| 264.352232 | 264.3558688 | 264.3670528 | 264.334136 | 264.3255264 | 264.0754192 | 261.0918824 |
| 264.353232 | 264.3608688 | 264.3680528 | 264.337136 | 264.3285264 | 264.0804192 | 261.0958824 |
| 264.352232 | 264.3558688 | 264.3660528 | 264.334136 | 264.3235264 | 264.0774192 | 261.0918824 |
| 264.349232 | 264.3578688 | 264.3660528 | 264.335136 | 264.3245264 | 264.0804192 | 261.0928824 |
| 264.351232 | 264.3568688 | 264.3670528 | 264.335136 | 264.3245264 | 264.0794192 | 261.0908824 |
| 264.348232 | 264.3558688 | 264.3680528 | 264.334136 | 264.3245264 | 264.0764192 | 261.0928824 |
| 264.349232 | 264.3568688 | 264.3690528 | 264.337136 | 264.3245264 | 264.0784192 | 261.0948824 |
| 264.350232 | 264.3558688 | 264.3660528 | 264.334136 | 264.3215264 | 264.0754192 | 261.0918824 |
| 264.349232 | 264.3578688 | 264.3660528 | 264.334136 | 264.3235264 | 264.0764192 | 261.0948824 |
| 264.348232 | 264.3558688 | 264.3660528 | 264.334136 | 264.3215264 | 264.0774192 | 261.0918824 |
| 264.350232 | 264.3558688 | 264.3640528 | 264.334136 | 264.3235264 | 264.0774192 | 261.0928824 |
| 264.349232 | 264.3578688 | 264.3660528 | 264.335136 | 264.3235264 | 264.0784192 | 261.0918824 |
| 264.349232 | 264.3578688 | 264.3680528 | 264.337136 | 264.3245264 | 264.0784192 | 261.0928824 |
| 264.350232 | 264.3548688 | 264.3660528 | 264.332136 | 264.3215264 | 264.0754192 | 261.0918824 |
| 264.349232 | 264.3558688 | 264.3660528 | 264.332136 | 264.3215264 | 264.0744192 | 261.0918824 |
| 264.350232 | 264.3568688 | 264.3670528 | 264.335136 | 264.3245264 | 264.0774192 | 261.0938824 |
| 264.349232 | 264.3558688 | 264.3650528 | 264.333136 | 264.3245264 | 264.0784192 | 261.0908824 |
| 264.349232 | 264.3568688 | 264.3640528 | 264.333136 | 264.3225264 | 264.0764192 | 261.0908824 |
| 264.350232 | 264.3568688 | 264.3650528 | 264.333136 | 264.3225264 | 264.0774192 | 261.0908824 |
| 264.348232 | 264.3538688 | 264.3640528 | 264.334136 | 264.3215264 | 264.0744192 | 261.0898824 |
| 264.348232 | 264.3558688 | 264.3660528 | 264.334136 | 264.3215264 | 264.0764192 | 261.0898824 |
| 264.348232 | 264.3558688 | 264.3640528 | 264.332136 | 264.3235264 | 264.0774192 | 261.0898824 |
| 264.350232 | 264.3558688 | 264.3640528 | 264.332136 | 264.3235264 | 264.0754192 | 261.0898824 |
| 264.350232 | 264.3548688 | 264.3670528 | 264.333136 | 264.3205264 | 264.0774192 | 261.0908824 |
| 264.350232 | 264.3548688 | 264.3630528 | 264.334136 | 264.3235264 | 264.0774192 | 261.0918824 |
| 264.350232 | 264.3548688 | 264.3650528 | 264.334136 | 264.3235264 | 264.0774192 | 261.0918824 |
| 264.349232 | 264.3548688 | 264.3650528 | 264.334136 | 264.3205264 | 264.0754192 | 261.0908824 |
| 264.349232 | 264.3548688 | 264.3640528 | 264.333136 | 264.3225264 | 264.0764192 | 261.0888824 |
| 264.346232 | 264.3518688 | 264.3620528 | 264.330136 | 264.3215264 | 264.0764192 | 261.0898824 |

|            |             |             |            |             |             |             |
|------------|-------------|-------------|------------|-------------|-------------|-------------|
| 264.346232 | 264.3538688 | 264.3640528 | 264.333136 | 264.3215264 | 264.0754192 | 261.0898824 |
| 264.346232 | 264.3558688 | 264.3640528 | 264.333136 | 264.3215264 | 264.0774192 | 261.0878824 |
| 264.350232 | 264.3538688 | 264.3630528 | 264.337136 | 264.3255264 | 264.0814192 | 261.0878824 |
| 264.352232 | 264.3568688 | 264.3630528 | 264.339136 | 264.3275264 | 264.0784192 | 261.0898824 |
| 264.356232 | 264.3588688 | 264.3620528 | 264.344136 | 264.3315264 | 264.0804192 | 261.0868824 |
| 264.362232 | 264.3618688 | 264.3640528 | 264.347136 | 264.3345264 | 264.0814192 | 261.0898824 |
| 264.361232 | 264.3648688 | 264.3650528 | 264.347136 | 264.3345264 | 264.0944192 | 261.0898824 |
| 264.361232 | 264.3638688 | 264.3630528 | 264.344136 | 264.3345264 | 264.0954192 | 261.0888824 |
| 264.360232 | 264.3608688 | 264.3640528 | 264.342136 | 264.3325264 | 264.0984192 | 261.0868824 |
| 264.361232 | 264.3638688 | 264.3630528 | 264.345136 | 264.3335264 | 264.0974192 | 261.0888824 |
| 264.363232 | 264.3648688 | 264.3630528 | 264.348136 | 264.3355264 | 264.0974192 | 261.0848824 |
| 264.364232 | 264.3668688 | 264.3640528 | 264.349136 | 264.3375264 | 264.0964192 | 261.0858824 |
| 264.368232 | 264.3708688 | 264.3650528 | 264.353136 | 264.3425264 | 264.0984192 | 261.0878824 |
| 264.369232 | 264.3678688 | 264.3650528 | 264.353136 | 264.3405264 | 264.0994192 | 261.0868824 |
| 264.372232 | 264.3708688 | 264.3670528 | 264.355136 | 264.3435264 | 264.1044192 | 261.0898824 |
| 264.370232 | 264.3708688 | 264.3670528 | 264.354136 | 264.3435264 | 264.1064192 | 261.0868824 |
| 264.366232 | 264.3698688 | 264.3670528 | 264.351136 | 264.3405264 | 264.1074192 | 261.0878824 |
| 264.365232 | 264.3678688 | 264.3650528 | 264.348136 | 264.3385264 | 264.1064192 | 261.0848824 |
| 264.367232 | 264.3708688 | 264.3680528 | 264.352136 | 264.3435264 | 264.1074192 | 261.0898824 |
| 264.367232 | 264.3728688 | 264.3680528 | 264.354136 | 264.3435264 | 264.1034192 | 261.0858824 |
| 264.371232 | 264.3708688 | 264.3650528 | 264.355136 | 264.3445264 | 264.1034192 | 261.0878824 |
| 264.370232 | 264.3708688 | 264.3670528 | 264.357136 | 264.3445264 | 264.1004192 | 261.0858824 |
| 264.373232 | 264.3728688 | 264.3660528 | 264.358136 | 264.3475264 | 264.1074192 | 261.0868824 |
| 264.369232 | 264.3718688 | 264.3690528 | 264.354136 | 264.3455264 | 264.1084192 | 261.0868824 |
| 264.368232 | 264.3708688 | 264.3670528 | 264.356136 | 264.3425264 | 264.1064192 | 261.0868824 |
| 264.369232 | 264.3728688 | 264.3680528 | 264.353136 | 264.3435264 | 264.1054192 | 261.0878824 |
| 264.368232 | 264.3718688 | 264.3710528 | 264.355136 | 264.3435264 | 264.1044192 | 261.0868824 |
| 264.368232 | 264.3718688 | 264.3700528 | 264.354136 | 264.3445264 | 264.1024192 | 261.0878824 |
| 264.371232 | 264.3718688 | 264.3700528 | 264.356136 | 264.3445264 | 264.1034192 | 261.0878824 |
| 264.371232 | 264.3728688 | 264.3710528 | 264.357136 | 264.3455264 | 264.1034192 | 261.0898824 |
| 264.369232 | 264.3718688 | 264.3680528 | 264.356136 | 264.3435264 | 264.0984192 | 261.0878824 |
| 264.372232 | 264.3728688 | 264.3700528 | 264.357136 | 264.3465264 | 264.1024192 | 261.0908824 |
| 264.373232 | 264.3738688 | 264.3720528 | 264.360136 | 264.3475264 | 264.1074192 | 261.0938824 |
| 264.369232 | 264.3738688 | 264.3720528 | 264.356136 | 264.3445264 | 264.1054192 | 261.0918824 |
| 264.367232 | 264.3708688 | 264.3700528 | 264.353136 | 264.3425264 | 264.1034192 | 261.0938824 |
| 264.366232 | 264.3698688 | 264.3680528 | 264.350136 | 264.3395264 | 264.1044192 | 261.0938824 |
| 264.365232 | 264.3678688 | 264.3680528 | 264.350136 | 264.3385264 | 264.1014192 | 261.0918824 |
| 264.366232 | 264.3688688 | 264.3700528 | 264.349136 | 264.3385264 | 264.1004192 | 261.0958824 |
| 264.361232 | 264.3658688 | 264.3680528 | 264.345136 | 264.3355264 | 264.0994192 | 261.0948824 |
| 264.359232 | 264.3658688 | 264.3690528 | 264.345136 | 264.3335264 | 264.0954192 | 261.0978824 |
| 264.358232 | 264.3638688 | 264.3680528 | 264.344136 | 264.3325264 | 264.0944192 | 261.0988824 |
| 264.355232 | 264.3638688 | 264.3680528 | 264.341136 | 264.3325264 | 264.0924192 | 261.0988824 |
| 264.356232 | 264.3638688 | 264.3690528 | 264.344136 | 264.3325264 | 264.0924192 | 261.0988824 |
| 264.358232 | 264.3638688 | 264.3670528 | 264.344136 | 264.3305264 | 264.0884192 | 261.0998824 |
| 264.355232 | 264.3618688 | 264.3690528 | 264.342136 | 264.3305264 | 264.0844192 | 261.1018824 |
| 264.355232 | 264.3618688 | 264.3680528 | 264.342136 | 264.3315264 | 264.0874192 | 261.1008824 |
| 264.355232 | 264.3598688 | 264.3670528 | 264.338136 | 264.3285264 | 264.0844192 | 261.1018824 |

|            |             |             |            |             |             |             |
|------------|-------------|-------------|------------|-------------|-------------|-------------|
| 264.353232 | 264.3598688 | 264.3650528 | 264.338136 | 264.3265264 | 264.0844192 | 261.0998824 |
| 264.353232 | 264.3598688 | 264.3670528 | 264.337136 | 264.3265264 | 264.0824192 | 261.0998824 |
| 264.355232 | 264.3578688 | 264.3650528 | 264.337136 | 264.3245264 | 264.0834192 | 261.1008824 |
| 264.356232 | 264.3598688 | 264.3670528 | 264.338136 | 264.3255264 | 264.0844192 | 261.1028824 |
| 264.354232 | 264.3578688 | 264.3660528 | 264.338136 | 264.3255264 | 264.0824192 | 261.1028824 |
| 264.352232 | 264.3598688 | 264.3640528 | 264.336136 | 264.3255264 | 264.0814192 | 261.1008824 |
| 264.355232 | 264.3598688 | 264.3670528 | 264.339136 | 264.3285264 | 264.0844192 | 261.1058824 |
| 264.359232 | 264.3608688 | 264.3670528 | 264.342136 | 264.3325264 | 264.0844192 | 261.1058824 |
| 264.362232 | 264.3638688 | 264.3680528 | 264.345136 | 264.3355264 | 264.0854192 | 261.1048824 |
| 264.364232 | 264.3658688 | 264.3670528 | 264.345136 | 264.3355264 | 264.0874192 | 261.1038824 |
| 264.364232 | 264.3668688 | 264.3650528 | 264.348136 | 264.3375264 | 264.0914192 | 261.1058824 |
| 264.365232 | 264.3668688 | 264.3660528 | 264.348136 | 264.3375264 | 264.0954192 | 261.1028824 |
| 264.365232 | 264.3668688 | 264.3650528 | 264.348136 | 264.3365264 | 264.0984192 | 261.1048824 |
| 264.364232 | 264.3668688 | 264.3670528 | 264.349136 | 264.3375264 | 264.1004192 | 261.1018824 |
| 264.366232 | 264.3668688 | 264.3670528 | 264.350136 | 264.3385264 | 264.1024192 | 261.1038824 |
| 264.366232 | 264.3688688 | 264.3670528 | 264.349136 | 264.3385264 | 264.1034192 | 261.1038824 |
| 264.368232 | 264.3688688 | 264.3670528 | 264.349136 | 264.3385264 | 264.1054192 | 261.1018824 |
| 264.367232 | 264.3688688 | 264.3670528 | 264.350136 | 264.3405264 | 264.0994192 | 261.1018824 |
| 264.367232 | 264.3698688 | 264.3660528 | 264.352136 | 264.3395264 | 264.1044192 | 261.1028824 |
| 264.365232 | 264.3668688 | 264.3670528 | 264.350136 | 264.3405264 | 264.1034192 | 261.0988824 |
| 264.367232 | 264.3688688 | 264.3660528 | 264.350136 | 264.3395264 | 264.1034192 | 261.1018824 |
| 264.368232 | 264.3698688 | 264.3680528 | 264.353136 | 264.3435264 | 264.1064192 | 261.0998824 |
| 264.366232 | 264.3678688 | 264.3680528 | 264.350136 | 264.3415264 | 264.1024192 | 261.0998824 |
| 264.366232 | 264.3698688 | 264.3690528 | 264.351136 | 264.3425264 | 264.1024192 | 261.0998824 |
| 264.365232 | 264.3678688 | 264.3680528 | 264.350136 | 264.3395264 | 264.1044192 | 261.0968824 |
| 264.366232 | 264.3678688 | 264.3650528 | 264.348136 | 264.3375264 | 264.1004192 | 261.0958824 |
| 264.364232 | 264.3678688 | 264.3650528 | 264.349136 | 264.3385264 | 264.1014192 | 261.0958824 |
| 264.366232 | 264.3698688 | 264.3670528 | 264.349136 | 264.3385264 | 264.1004192 | 261.0948824 |
| 264.363232 | 264.3668688 | 264.3660528 | 264.347136 | 264.3375264 | 264.1024192 | 261.0938824 |
| 264.364232 | 264.3668688 | 264.3670528 | 264.350136 | 264.3385264 | 264.1004192 | 261.0958824 |
| 264.367232 | 264.3708688 | 264.3690528 | 264.351136 | 264.3405264 | 264.1014192 | 261.0958824 |
| 264.363232 | 264.3668688 | 264.3670528 | 264.349136 | 264.3385264 | 264.0984192 | 261.0958824 |
| 264.365232 | 264.3678688 | 264.3680528 | 264.349136 | 264.3385264 | 264.1014192 | 261.0958824 |
| 264.366232 | 264.3678688 | 264.3680528 | 264.350136 | 264.3415264 | 264.1004192 | 261.0968824 |
| 264.364232 | 264.3688688 | 264.3680528 | 264.350136 | 264.3415264 | 264.1004192 | 261.0968824 |
| 264.364232 | 264.3708688 | 264.3690528 | 264.350136 | 264.3395264 | 264.0984192 | 261.0988824 |
| 264.365232 | 264.3698688 | 264.3670528 | 264.353136 | 264.3385264 | 264.0984192 | 261.0968824 |
| 264.365232 | 264.3708688 | 264.3690528 | 264.352136 | 264.3405264 | 264.1004192 | 261.0988824 |
| 264.367232 | 264.3718688 | 264.3700528 | 264.351136 | 264.3405264 | 264.1014192 | 261.0998824 |
| 264.365232 | 264.3688688 | 264.3690528 | 264.352136 | 264.3395264 | 264.0944192 | 261.0988824 |
| 264.366232 | 264.3708688 | 264.3690528 | 264.350136 | 264.3395264 | 264.1004192 | 261.0988824 |
| 264.367232 | 264.3698688 | 264.3700528 | 264.351136 | 264.3385264 | 264.0994192 | 261.0998824 |
| 264.363232 | 264.3688688 | 264.3670528 | 264.350136 | 264.3385264 | 264.0994192 | 261.0978824 |
| 264.366232 | 264.3698688 | 264.3700528 | 264.351136 | 264.3385264 | 264.0994192 | 261.1008824 |
| 264.364232 | 264.3688688 | 264.3680528 | 264.350136 | 264.3405264 | 264.0994192 | 261.0998824 |
| 264.363232 | 264.3688688 | 264.3670528 | 264.348136 | 264.3375264 | 264.0984192 | 261.0978824 |
| 264.364232 | 264.3678688 | 264.3670528 | 264.351136 | 264.3395264 | 264.1004192 | 261.1008824 |



|            |             |             |            |             |             |             |
|------------|-------------|-------------|------------|-------------|-------------|-------------|
| 264.364232 | 264.3678688 | 264.3680528 | 264.349136 | 264.3385264 | 264.0974192 | 261.0998824 |
| 264.364232 | 264.3668688 | 264.3680528 | 264.348136 | 264.3385264 | 264.0994192 | 261.0978824 |
| 264.367232 | 264.3678688 | 264.3690528 | 264.349136 | 264.3395264 | 264.1004192 | 261.1008824 |
| 264.366232 | 264.3678688 | 264.3690528 | 264.349136 | 264.3395264 | 264.0984192 | 261.1008824 |
| 264.364232 | 264.3678688 | 264.3670528 | 264.349136 | 264.3375264 | 264.0984192 | 261.0988824 |
| 264.363232 | 264.3678688 | 264.3670528 | 264.349136 | 264.3395264 | 264.0984192 | 261.0988824 |
| 264.365232 | 264.3678688 | 264.3680528 | 264.349136 | 264.3385264 | 264.0974192 | 261.1008824 |
| 264.366232 | 264.3688688 | 264.3700528 | 264.352136 | 264.3385264 | 264.1004192 | 261.0998824 |
| 264.362232 | 264.3658688 | 264.3660528 | 264.348136 | 264.3365264 | 264.0974192 | 261.1018824 |
| 264.364232 | 264.3678688 | 264.3680528 | 264.350136 | 264.3385264 | 264.0964192 | 261.1018824 |
| 264.363232 | 264.3668688 | 264.3690528 | 264.350136 | 264.3375264 | 264.0944192 | 261.1008824 |
| 264.364232 | 264.3688688 | 264.3720528 | 264.351136 | 264.3395264 | 264.1014192 | 261.1028824 |
| 264.364232 | 264.3678688 | 264.3690528 | 264.349136 | 264.3385264 | 264.0974192 | 261.1008824 |
| 264.364232 | 264.3668688 | 264.3690528 | 264.350136 | 264.3365264 | 264.0984192 | 261.1038824 |
| 264.366232 | 264.3678688 | 264.3680528 | 264.350136 | 264.3375264 | 264.0954192 | 261.1028824 |
| 264.364232 | 264.3688688 | 264.3690528 | 264.351136 | 264.3385264 | 264.0964192 | 261.1028824 |
| 264.364232 | 264.3658688 | 264.3680528 | 264.349136 | 264.3375264 | 264.0964192 | 261.1048824 |
| 264.363232 | 264.3678688 | 264.3680528 | 264.348136 | 264.3365264 | 264.0944192 | 261.1018824 |
| 264.364232 | 264.3658688 | 264.3680528 | 264.350136 | 264.3375264 | 264.0974192 | 261.1048824 |
| 264.363232 | 264.3688688 | 264.3690528 | 264.348136 | 264.3365264 | 264.0984192 | 261.1038824 |
| 264.362232 | 264.3658688 | 264.3690528 | 264.348136 | 264.3365264 | 264.0964192 | 261.1008824 |
| 264.358232 | 264.3638688 | 264.3670528 | 264.344136 | 264.3335264 | 264.0944192 | 261.1028824 |
| 264.359232 | 264.3648688 | 264.3680528 | 264.344136 | 264.3345264 | 264.1004192 | 261.1048824 |
| 264.356232 | 264.3628688 | 264.3680528 | 264.342136 | 264.3325264 | 264.0964192 | 261.1028824 |
| 264.354232 | 264.3618688 | 264.3670528 | 264.340136 | 264.3305264 | 264.0944192 | 261.1028824 |
| 264.355232 | 264.3608688 | 264.3660528 | 264.340136 | 264.3295264 | 264.0914192 | 261.1028824 |
| 264.356232 | 264.3608688 | 264.3640528 | 264.339136 | 264.3285264 | 264.0914192 | 261.1018824 |
| 264.355232 | 264.3588688 | 264.3670528 | 264.339136 | 264.3265264 | 264.0884192 | 261.1038824 |
| 264.353232 | 264.3588688 | 264.3650528 | 264.337136 | 264.3265264 | 264.0844192 | 261.0998824 |
| 264.353232 | 264.3568688 | 264.3680528 | 264.337136 | 264.3265264 | 264.0844192 | 261.1028824 |
| 264.352232 | 264.3588688 | 264.3670528 | 264.335136 | 264.3255264 | 264.0834192 | 261.1028824 |
| 264.352232 | 264.3578688 | 264.3650528 | 264.336136 | 264.3255264 | 264.0834192 | 261.1028824 |
| 264.350232 | 264.3568688 | 264.3640528 | 264.335136 | 264.3235264 | 264.0814192 | 261.1008824 |
| 264.352232 | 264.3578688 | 264.3650528 | 264.334136 | 264.3255264 | 264.0824192 | 261.1018824 |
| 264.348232 | 264.3548688 | 264.3620528 | 264.333136 | 264.3215264 | 264.0794192 | 261.0988824 |
| 264.349232 | 264.3558688 | 264.3650528 | 264.332136 | 264.3235264 | 264.0804192 | 261.0998824 |
| 264.350232 | 264.3558688 | 264.3660528 | 264.334136 | 264.3225264 | 264.0814192 | 261.1028824 |
| 264.348232 | 264.3538688 | 264.3630528 | 264.332136 | 264.3225264 | 264.0814192 | 261.1028824 |
| 264.349232 | 264.3548688 | 264.3650528 | 264.335136 | 264.3235264 | 264.0784192 | 261.1008824 |
| 264.351232 | 264.3548688 | 264.3630528 | 264.333136 | 264.3235264 | 264.0814192 | 261.1028824 |
| 264.348232 | 264.3548688 | 264.3620528 | 264.332136 | 264.3205264 | 264.0794192 | 261.0998824 |
| 264.350232 | 264.3548688 | 264.3600528 | 264.333136 | 264.3205264 | 264.0814192 | 261.1018824 |
| 264.351232 | 264.3558688 | 264.3650528 | 264.335136 | 264.3215264 | 264.0764192 | 261.1018824 |
| 264.351232 | 264.3538688 | 264.3640528 | 264.335136 | 264.3235264 | 264.0784192 | 261.1008824 |
| 264.350232 | 264.3538688 | 264.3640528 | 264.333136 | 264.3225264 | 264.0794192 | 261.1028824 |
| 264.350232 | 264.3528688 | 264.3640528 | 264.333136 | 264.3205264 | 264.0794192 | 261.1008824 |
| 264.351232 | 264.3538688 | 264.3630528 | 264.333136 | 264.3195264 | 264.0764192 | 261.1018824 |

|            |             |             |            |             |             |             |
|------------|-------------|-------------|------------|-------------|-------------|-------------|
| 264.347232 | 264.3518688 | 264.3610528 | 264.333136 | 264.3215264 | 264.0764192 | 261.0988824 |
| 264.348232 | 264.3518688 | 264.3620528 | 264.332136 | 264.3195264 | 264.0774192 | 261.0998824 |
| 264.347232 | 264.3508688 | 264.3610528 | 264.331136 | 264.3185264 | 264.0764192 | 261.0998824 |
| 264.350232 | 264.3528688 | 264.3630528 | 264.335136 | 264.3225264 | 264.0794192 | 261.0998824 |
| 264.348232 | 264.3528688 | 264.3620528 | 264.332136 | 264.3205264 | 264.0794192 | 261.0998824 |
| 264.347232 | 264.3528688 | 264.3630528 | 264.332136 | 264.3205264 | 264.0784192 | 261.0998824 |
| 264.349232 | 264.3538688 | 264.3610528 | 264.333136 | 264.3205264 | 264.0784192 | 261.0978824 |
| 264.347232 | 264.3538688 | 264.3620528 | 264.334136 | 264.3205264 | 264.0784192 | 261.0998824 |
| 264.347232 | 264.3518688 | 264.3620528 | 264.332136 | 264.3195264 | 264.0784192 | 261.0988824 |
| 264.350232 | 264.3528688 | 264.3610528 | 264.333136 | 264.3205264 | 264.0774192 | 261.0998824 |
| 264.345232 | 264.3518688 | 264.3600528 | 264.329136 | 264.3185264 | 264.0764192 | 261.0968824 |
| 264.348232 | 264.3528688 | 264.3620528 | 264.333136 | 264.3195264 | 264.0794192 | 261.0958824 |
| 264.348232 | 264.3518688 | 264.3610528 | 264.333136 | 264.3195264 | 264.0774192 | 261.0978824 |
| 264.347232 | 264.3528688 | 264.3610528 | 264.331136 | 264.3195264 | 264.0784192 | 261.0938824 |
| 264.347232 | 264.3508688 | 264.3590528 | 264.329136 | 264.3175264 | 264.0784192 | 261.0938824 |
| 264.345232 | 264.3528688 | 264.3610528 | 264.329136 | 264.3195264 | 264.0744192 | 261.0938824 |
| 264.348232 | 264.3538688 | 264.3620528 | 264.332136 | 264.3215264 | 264.0774192 | 261.0968824 |
| 264.346232 | 264.3518688 | 264.3600528 | 264.332136 | 264.3195264 | 264.0764192 | 261.0938824 |
| 264.348232 | 264.3538688 | 264.3610528 | 264.331136 | 264.3195264 | 264.0794192 | 261.0958824 |
| 264.346232 | 264.3518688 | 264.3590528 | 264.329136 | 264.3185264 | 264.0774192 | 261.0948824 |
| 264.344232 | 264.3498688 | 264.3570528 | 264.329136 | 264.3175264 | 264.0774192 | 261.0908824 |
| 264.349232 | 264.3518688 | 264.3600528 | 264.331136 | 264.3185264 | 264.0784192 | 261.0928824 |
| 264.349232 | 264.3528688 | 264.3600528 | 264.332136 | 264.3195264 | 264.0814192 | 261.0948824 |
| 264.348232 | 264.3508688 | 264.3590528 | 264.332136 | 264.3175264 | 264.0794192 | 261.0898824 |
| 264.346232 | 264.3508688 | 264.3590528 | 264.331136 | 264.3175264 | 264.0774192 | 261.0898824 |
| 264.347232 | 264.3518688 | 264.3600528 | 264.331136 | 264.3185264 | 264.0764192 | 261.0908824 |
| 264.348232 | 264.3518688 | 264.3570528 | 264.332136 | 264.3175264 | 264.0774192 | 261.0888824 |
| 264.345232 | 264.3498688 | 264.3580528 | 264.328136 | 264.3165264 | 264.0764192 | 261.0888824 |
| 264.344232 | 264.3498688 | 264.3590528 | 264.332136 | 264.3195264 | 264.0774192 | 261.0918824 |
| 264.346232 | 264.3508688 | 264.3570528 | 264.329136 | 264.3185264 | 264.0774192 | 261.0878824 |
| 264.346232 | 264.3518688 | 264.3600528 | 264.329136 | 264.3155264 | 264.0774192 | 261.0908824 |
| 264.345232 | 264.3518688 | 264.3580528 | 264.329136 | 264.3155264 | 264.0764192 | 261.0878824 |
| 264.346232 | 264.3518688 | 264.3580528 | 264.330136 | 264.3165264 | 264.0774192 | 261.0888824 |
| 264.346232 | 264.3508688 | 264.3580528 | 264.331136 | 264.3175264 | 264.0814192 | 261.0898824 |
| 264.347232 | 264.3508688 | 264.3590528 | 264.330136 | 264.3185264 | 264.0784192 | 261.0908824 |
| 264.345232 | 264.3528688 | 264.3560528 | 264.329136 | 264.3175264 | 264.0794192 | 261.0878824 |
| 264.349232 | 264.3518688 | 264.3590528 | 264.334136 | 264.3185264 | 264.0784192 | 261.0888824 |
| 264.346232 | 264.3488688 | 264.3590528 | 264.329136 | 264.3165264 | 264.0774192 | 261.0878824 |
| 264.345232 | 264.3508688 | 264.3590528 | 264.332136 | 264.3185264 | 264.0784192 | 261.0868824 |
| 264.346232 | 264.3518688 | 264.3580528 | 264.332136 | 264.3195264 | 264.0774192 | 261.0898824 |
| 264.345232 | 264.3508688 | 264.3570528 | 264.330136 | 264.3165264 | 264.0744192 | 261.0888824 |
| 264.347232 | 264.3518688 | 264.3590528 | 264.329136 | 264.3165264 | 264.0804192 | 261.0888824 |
| 264.346232 | 264.3518688 | 264.3560528 | 264.330136 | 264.3175264 | 264.0794192 | 261.0888824 |
| 264.346232 | 264.3498688 | 264.3580528 | 264.331136 | 264.3175264 | 264.0774192 | 261.0888824 |
| 264.348232 | 264.3508688 | 264.3590528 | 264.331136 | 264.3185264 | 264.0834192 | 261.0888824 |
| 264.348232 | 264.3488688 | 264.3580528 | 264.330136 | 264.3195264 | 264.0804192 | 261.0888824 |
| 264.347232 | 264.3498688 | 264.3570528 | 264.329136 | 264.3185264 | 264.0784192 | 261.0878824 |

|            |             |             |            |             |             |             |
|------------|-------------|-------------|------------|-------------|-------------|-------------|
| 264.347232 | 264.3498688 | 264.3590528 | 264.329136 | 264.3185264 | 264.0784192 | 261.0898824 |
| 264.346232 | 264.3488688 | 264.3580528 | 264.330136 | 264.3155264 | 264.0794192 | 261.0868824 |
| 264.347232 | 264.3498688 | 264.3590528 | 264.330136 | 264.3185264 | 264.0784192 | 261.0878824 |
| 264.347232 | 264.3498688 | 264.3570528 | 264.331136 | 264.3185264 | 264.0784192 | 261.0868824 |
| 264.346232 | 264.3498688 | 264.3560528 | 264.328136 | 264.3155264 | 264.0754192 | 261.0878824 |
| 264.347232 | 264.3528688 | 264.3590528 | 264.331136 | 264.3205264 | 264.0784192 | 261.0878824 |
| 264.346232 | 264.3488688 | 264.3560528 | 264.330136 | 264.3155264 | 264.0774192 | 261.0848824 |
| 264.345232 | 264.3488688 | 264.3560528 | 264.328136 | 264.3175264 | 264.0774192 | 261.0868824 |
| 264.347232 | 264.3488688 | 264.3570528 | 264.328136 | 264.3165264 | 264.0764192 | 261.0888824 |
| 264.345232 | 264.3488688 | 264.3570528 | 264.329136 | 264.3165264 | 264.0784192 | 261.0858824 |
| 264.344232 | 264.3458688 | 264.3540528 | 264.328136 | 264.3155264 | 264.0774192 | 261.0848824 |
| 264.344232 | 264.3478688 | 264.3540528 | 264.328136 | 264.3185264 | 264.0754192 | 261.0848824 |
| 264.346232 | 264.3488688 | 264.3540528 | 264.329136 | 264.3185264 | 264.0794192 | 261.0858824 |
| 264.345232 | 264.3498688 | 264.3550528 | 264.330136 | 264.3175264 | 264.0774192 | 261.0878824 |
| 264.347232 | 264.3478688 | 264.3550528 | 264.330136 | 264.3175264 | 264.0764192 | 261.0878824 |
| 264.343232 | 264.3458688 | 264.3540528 | 264.325136 | 264.3135264 | 264.0754192 | 261.0858824 |
| 264.345232 | 264.3468688 | 264.3560528 | 264.327136 | 264.3155264 | 264.0794192 | 261.0858824 |
| 264.345232 | 264.3488688 | 264.3570528 | 264.329136 | 264.3175264 | 264.0784192 | 261.0858824 |
| 264.344232 | 264.3488688 | 264.3550528 | 264.329136 | 264.3175264 | 264.0784192 | 261.0878824 |
| 264.344232 | 264.3478688 | 264.3550528 | 264.329136 | 264.3165264 | 264.0804192 | 261.0858824 |
| 264.343232 | 264.3468688 | 264.3540528 | 264.328136 | 264.3165264 | 264.0764192 | 261.0848824 |
| 264.345232 | 264.3478688 | 264.3540528 | 264.328136 | 264.3165264 | 264.0774192 | 261.0868824 |
| 264.343232 | 264.3478688 | 264.3550528 | 264.328136 | 264.3175264 | 264.0804192 | 261.0858824 |
| 264.346232 | 264.3488688 | 264.3550528 | 264.330136 | 264.3175264 | 264.0784192 | 261.0868824 |
| 264.346232 | 264.3468688 | 264.3560528 | 264.329136 | 264.3175264 | 264.0774192 | 261.0858824 |
| 264.345232 | 264.3468688 | 264.3560528 | 264.329136 | 264.3175264 | 264.0774192 | 261.0848824 |
| 264.345232 | 264.3468688 | 264.3550528 | 264.329136 | 264.3145264 | 264.0764192 | 261.0848824 |
| 264.343232 | 264.3458688 | 264.3540528 | 264.327136 | 264.3135264 | 264.0754192 | 261.0818824 |
| 264.344232 | 264.3478688 | 264.3560528 | 264.328136 | 264.3175264 | 264.0774192 | 261.0848824 |
| 264.345232 | 264.3478688 | 264.3560528 | 264.327136 | 264.3175264 | 264.0794192 | 261.0838824 |
| 264.345232 | 264.3478688 | 264.3560528 | 264.329136 | 264.3175264 | 264.0774192 | 261.0858824 |
| 264.345232 | 264.3478688 | 264.3560528 | 264.329136 | 264.3175264 | 264.0774192 | 261.0838824 |
| 264.343232 | 264.3478688 | 264.3560528 | 264.329136 | 264.3165264 | 264.0804192 | 261.0838824 |
| 264.344232 | 264.3488688 | 264.3550528 | 264.329136 | 264.3165264 | 264.0754192 | 261.0848824 |
| 264.345232 | 264.3468688 | 264.3540528 | 264.328136 | 264.3175264 | 264.0774192 | 261.0848824 |
| 264.343232 | 264.3468688 | 264.3540528 | 264.328136 | 264.3175264 | 264.0764192 | 261.0848824 |
| 264.346232 | 264.3488688 | 264.3560528 | 264.331136 | 264.3175264 | 264.0794192 | 261.0848824 |
| 264.345232 | 264.3488688 | 264.3540528 | 264.328136 | 264.3175264 | 264.0754192 | 261.0848824 |
| 264.344232 | 264.3488688 | 264.3550528 | 264.329136 | 264.3165264 | 264.0794192 | 261.0858824 |
| 264.342232 | 264.3488688 | 264.3540528 | 264.328136 | 264.3165264 | 264.0774192 | 261.0828824 |
| 264.345232 | 264.3478688 | 264.3550528 | 264.329136 | 264.3165264 | 264.0784192 | 261.0858824 |
| 264.345232 | 264.3478688 | 264.3550528 | 264.329136 | 264.3175264 | 264.0784192 | 261.0838824 |
| 264.345232 | 264.3468688 | 264.3550528 | 264.329136 | 264.3175264 | 264.0764192 | 261.0838824 |
| 264.343232 | 264.3478688 | 264.3540528 | 264.330136 | 264.3175264 | 264.0764192 | 261.0858824 |
| 264.344232 | 264.3478688 | 264.3520528 | 264.328136 | 264.3175264 | 264.0774192 | 261.0848824 |
| 264.344232 | 264.3478688 | 264.3560528 | 264.328136 | 264.3175264 | 264.0774192 | 261.0848824 |
| 264.344232 | 264.3488688 | 264.3550528 | 264.331136 | 264.3185264 | 264.0804192 | 261.0848824 |

|            |             |             |            |             |             |             |
|------------|-------------|-------------|------------|-------------|-------------|-------------|
| 264.344232 | 264.3478688 | 264.3540528 | 264.330136 | 264.3175264 | 264.0794192 | 261.0858824 |
| 264.342232 | 264.3478688 | 264.3540528 | 264.328136 | 264.3175264 | 264.0754192 | 261.0838824 |
| 264.343232 | 264.3478688 | 264.3520528 | 264.330136 | 264.3155264 | 264.0794192 | 261.0858824 |
| 264.346232 | 264.3478688 | 264.3540528 | 264.332136 | 264.3205264 | 264.0794192 | 261.0848824 |
| 264.343232 | 264.3478688 | 264.3530528 | 264.329136 | 264.3165264 | 264.0784192 | 261.0878824 |
| 264.345232 | 264.3468688 | 264.3550528 | 264.329136 | 264.3175264 | 264.0784192 | 261.0858824 |
| 264.343232 | 264.3478688 | 264.3540528 | 264.330136 | 264.3195264 | 264.0774192 | 261.0838824 |
| 264.343232 | 264.3478688 | 264.3530528 | 264.327136 | 264.3175264 | 264.0784192 | 261.0838824 |
| 264.346232 | 264.3488688 | 264.3540528 | 264.330136 | 264.3185264 | 264.0774192 | 261.0838824 |
| 264.343232 | 264.3468688 | 264.3510528 | 264.328136 | 264.3185264 | 264.0764192 | 261.0828824 |
| 264.344232 | 264.3468688 | 264.3520528 | 264.327136 | 264.3175264 | 264.0794192 | 261.0858824 |
| 264.342232 | 264.3468688 | 264.3520528 | 264.327136 | 264.3175264 | 264.0774192 | 261.0838824 |
| 264.343232 | 264.3488688 | 264.3530528 | 264.327136 | 264.3185264 | 264.0754192 | 261.0838824 |
| 264.342232 | 264.3468688 | 264.3520528 | 264.327136 | 264.3135264 | 264.0754192 | 261.0838824 |
| 264.344232 | 264.3468688 | 264.3540528 | 264.327136 | 264.3175264 | 264.0774192 | 261.0848824 |
| 264.342232 | 264.3468688 | 264.3520528 | 264.327136 | 264.3175264 | 264.0734192 | 261.0838824 |
| 264.343232 | 264.3478688 | 264.3530528 | 264.328136 | 264.3165264 | 264.0744192 | 261.0828824 |
| 264.342232 | 264.3468688 | 264.3520528 | 264.327136 | 264.3195264 | 264.0774192 | 261.0838824 |
| 264.345232 | 264.3488688 | 264.3530528 | 264.329136 | 264.3185264 | 264.0794192 | 261.0848824 |
| 264.345232 | 264.3498688 | 264.3530528 | 264.330136 | 264.3185264 | 264.0784192 | 261.0858824 |
| 264.346232 | 264.3478688 | 264.3530528 | 264.330136 | 264.3185264 | 264.0774192 | 261.0848824 |
| 264.343232 | 264.3478688 | 264.3530528 | 264.327136 | 264.3175264 | 264.0764192 | 261.0838824 |
| 264.344232 | 264.3498688 | 264.3530528 | 264.330136 | 264.3185264 | 264.0794192 | 261.0848824 |
| 264.346232 | 264.3498688 | 264.3530528 | 264.330136 | 264.3195264 | 264.0814192 | 261.0868824 |
| 264.345232 | 264.3478688 | 264.3510528 | 264.328136 | 264.3185264 | 264.0764192 | 261.0818824 |
| 264.345232 | 264.3488688 | 264.3530528 | 264.329136 | 264.3175264 | 264.0804192 | 261.0858824 |
| 264.343232 | 264.3468688 | 264.3510528 | 264.328136 | 264.3165264 | 264.0784192 | 261.0818824 |
| 264.344232 | 264.3468688 | 264.3510528 | 264.329136 | 264.3165264 | 264.0764192 | 261.0808824 |
| 264.346232 | 264.3478688 | 264.3530528 | 264.329136 | 264.3175264 | 264.0794192 | 261.0858824 |
| 264.346232 | 264.3498688 | 264.3540528 | 264.329136 | 264.3185264 | 264.0804192 | 261.0848824 |
| 264.346232 | 264.3478688 | 264.3520528 | 264.329136 | 264.3165264 | 264.0804192 | 261.0848824 |
| 264.347232 | 264.3478688 | 264.3520528 | 264.328136 | 264.3185264 | 264.0804192 | 261.0848824 |
| 264.348232 | 264.3508688 | 264.3550528 | 264.330136 | 264.3195264 | 264.0814192 | 261.0858824 |
| 264.345232 | 264.3478688 | 264.3520528 | 264.329136 | 264.3175264 | 264.0814192 | 261.0828824 |
| 264.346232 | 264.3488688 | 264.3550528 | 264.330136 | 264.3175264 | 264.0824192 | 261.0868824 |
| 264.345232 | 264.3488688 | 264.3530528 | 264.329136 | 264.3175264 | 264.0804192 | 261.0838824 |
| 264.346232 | 264.3498688 | 264.3530528 | 264.331136 | 264.3175264 | 264.0814192 | 261.0848824 |
| 264.346232 | 264.3508688 | 264.3550528 | 264.329136 | 264.3195264 | 264.0844192 | 261.0858824 |
| 264.346232 | 264.3508688 | 264.3520528 | 264.329136 | 264.3175264 | 264.0814192 | 261.0848824 |
| 264.344232 | 264.3478688 | 264.3510528 | 264.329136 | 264.3175264 | 264.0844192 | 261.0858824 |
| 264.345232 | 264.3488688 | 264.3500528 | 264.328136 | 264.3165264 | 264.0804192 | 261.0838824 |
| 264.343232 | 264.3478688 | 264.3520528 | 264.328136 | 264.3165264 | 264.0814192 | 261.0838824 |
| 264.344232 | 264.3488688 | 264.3510528 | 264.330136 | 264.3155264 | 264.0794192 | 261.0828824 |
| 264.346232 | 264.3498688 | 264.3510528 | 264.329136 | 264.3185264 | 264.0794192 | 261.0828824 |
| 264.343232 | 264.3468688 | 264.3490528 | 264.326136 | 264.3155264 | 264.0784192 | 261.0818824 |
| 264.341232 | 264.3458688 | 264.3480528 | 264.323136 | 264.3125264 | 264.0774192 | 261.0788824 |
| 264.344232 | 264.3498688 | 264.3530528 | 264.327136 | 264.3145264 | 264.0794192 | 261.0828824 |

|            |             |             |            |             |             |             |
|------------|-------------|-------------|------------|-------------|-------------|-------------|
| 264.346232 | 264.3488688 | 264.3510528 | 264.330136 | 264.3155264 | 264.0794192 | 261.0818824 |
| 264.342232 | 264.3458688 | 264.3490528 | 264.324136 | 264.3145264 | 264.0774192 | 261.0818824 |
| 264.344232 | 264.3468688 | 264.3490528 | 264.326136 | 264.3135264 | 264.0794192 | 261.0858824 |
| 264.343232 | 264.3458688 | 264.3500528 | 264.327136 | 264.3155264 | 264.0804192 | 261.0828824 |
| 264.345232 | 264.3468688 | 264.3490528 | 264.326136 | 264.3145264 | 264.0814192 | 261.0858824 |
| 264.343232 | 264.3488688 | 264.3500528 | 264.327136 | 264.3175264 | 264.0804192 | 261.0848824 |
| 264.345232 | 264.3488688 | 264.3500528 | 264.330136 | 264.3165264 | 264.0824192 | 261.0818824 |
| 264.347232 | 264.3488688 | 264.3520528 | 264.330136 | 264.3195264 | 264.0804192 | 261.0888824 |
| 264.347232 | 264.3488688 | 264.3500528 | 264.330136 | 264.3175264 | 264.0804192 | 261.0838824 |
| 264.345232 | 264.3488688 | 264.3500528 | 264.328136 | 264.3175264 | 264.0804192 | 261.0818824 |
| 264.345232 | 264.3478688 | 264.3500528 | 264.329136 | 264.3185264 | 264.0804192 | 261.0808824 |
| 264.345232 | 264.3468688 | 264.3500528 | 264.327136 | 264.3185264 | 264.0814192 | 261.0848824 |
| 264.343232 | 264.3468688 | 264.3490528 | 264.330136 | 264.3165264 | 264.0794192 | 261.0838824 |
| 264.346232 | 264.3468688 | 264.3490528 | 264.328136 | 264.3165264 | 264.0794192 | 261.0818824 |
| 264.347232 | 264.3488688 | 264.3500528 | 264.329136 | 264.3165264 | 264.0804192 | 261.0828824 |
| 264.343232 | 264.3428688 | 264.3490528 | 264.325136 | 264.3125264 | 264.0784192 | 261.0788824 |
| 264.344232 | 264.3458688 | 264.3510528 | 264.327136 | 264.3155264 | 264.0794192 | 261.0838824 |
| 264.347232 | 264.3468688 | 264.3510528 | 264.329136 | 264.3195264 | 264.0804192 | 261.0828824 |
| 264.350232 | 264.3508688 | 264.3520528 | 264.333136 | 264.3225264 | 264.0834192 | 261.0858824 |
| 264.353232 | 264.3538688 | 264.3520528 | 264.336136 | 264.3255264 | 264.0824192 | 261.0818824 |
| 264.357232 | 264.3538688 | 264.3500528 | 264.340136 | 264.3285264 | 264.0844192 | 261.0838824 |
| 264.360232 | 264.3578688 | 264.3510528 | 264.342136 | 264.3305264 | 264.0854192 | 261.0858824 |
| 264.362232 | 264.3598688 | 264.3510528 | 264.345136 | 264.3345264 | 264.0954192 | 261.0868824 |
| 264.365232 | 264.3618688 | 264.3530528 | 264.347136 | 264.3365264 | 264.0964192 | 261.0878824 |
| 264.366232 | 264.3638688 | 264.3540528 | 264.351136 | 264.3395264 | 264.1044192 | 261.0888824 |
| 264.365232 | 264.3628688 | 264.3540528 | 264.349136 | 264.3385264 | 264.1084192 | 261.0888824 |
| 264.367232 | 264.3648688 | 264.3540528 | 264.346136 | 264.3385264 | 264.1054192 | 261.0888824 |
| 264.366232 | 264.3658688 | 264.3560528 | 264.351136 | 264.3425264 | 264.1084192 | 261.0898824 |
| 264.364232 | 264.3618688 | 264.3510528 | 264.347136 | 264.3365264 | 264.1054192 | 261.0858824 |
| 264.364232 | 264.3648688 | 264.3550528 | 264.348136 | 264.3375264 | 264.1074192 | 261.0858824 |
| 264.366232 | 264.3648688 | 264.3550528 | 264.350136 | 264.3395264 | 264.1074192 | 261.0858824 |
| 264.367232 | 264.3658688 | 264.3580528 | 264.350136 | 264.3395264 | 264.1074192 | 261.0888824 |
| 264.367232 | 264.3678688 | 264.3580528 | 264.349136 | 264.3405264 | 264.1074192 | 261.0868824 |
| 264.369232 | 264.3678688 | 264.3560528 | 264.351136 | 264.3405264 | 264.1054192 | 261.0888824 |
| 264.367232 | 264.3658688 | 264.3590528 | 264.355136 | 264.3425264 | 264.1044192 | 261.0858824 |
| 264.373232 | 264.3708688 | 264.3590528 | 264.358136 | 264.3465264 | 264.1044192 | 261.0888824 |
| 264.376232 | 264.3738688 | 264.3590528 | 264.361136 | 264.3495264 | 264.1074192 | 261.0878824 |
| 264.378232 | 264.3748688 | 264.3610528 | 264.363136 | 264.3535264 | 264.1114192 | 261.0898824 |
| 264.376232 | 264.3748688 | 264.3600528 | 264.364136 | 264.3525264 | 264.1124192 | 261.0868824 |
| 264.381232 | 264.3788688 | 264.3610528 | 264.367136 | 264.3555264 | 264.1174192 | 261.0888824 |
| 264.383232 | 264.3788688 | 264.3610528 | 264.368136 | 264.3535264 | 264.1214192 | 261.0898824 |
| 264.384232 | 264.3808688 | 264.3620528 | 264.368136 | 264.3575264 | 264.1264192 | 261.0878824 |
| 264.384232 | 264.3798688 | 264.3600528 | 264.369136 | 264.3555264 | 264.1224192 | 261.0928824 |
| 264.386232 | 264.3828688 | 264.3640528 | 264.369136 | 264.3605264 | 264.1274192 | 261.0938824 |
| 264.385232 | 264.3818688 | 264.3660528 | 264.371136 | 264.3595264 | 264.1284192 | 261.0958824 |
| 264.385232 | 264.3818688 | 264.3650528 | 264.370136 | 264.3585264 | 264.1294192 | 261.0978824 |
| 264.382232 | 264.3838688 | 264.3650528 | 264.370136 | 264.3585264 | 264.1264192 | 261.0968824 |

|            |             |             |            |             |             |             |
|------------|-------------|-------------|------------|-------------|-------------|-------------|
| 264.384232 | 264.3838688 | 264.3660528 | 264.371136 | 264.3605264 | 264.1284192 | 261.0998824 |
| 264.386232 | 264.3848688 | 264.3650528 | 264.370136 | 264.3585264 | 264.1264192 | 261.0988824 |
| 264.383232 | 264.3818688 | 264.3660528 | 264.368136 | 264.3585264 | 264.1264192 | 261.0998824 |
| 264.382232 | 264.3838688 | 264.3650528 | 264.367136 | 264.3575264 | 264.1274192 | 261.1018824 |
| 264.383232 | 264.3838688 | 264.3680528 | 264.369136 | 264.3605264 | 264.1234192 | 261.1028824 |
| 264.384232 | 264.3848688 | 264.3680528 | 264.368136 | 264.3595264 | 264.1224192 | 261.1048824 |
| 264.382232 | 264.3838688 | 264.3680528 | 264.369136 | 264.3595264 | 264.1184192 | 261.1038824 |
| 264.383232 | 264.3838688 | 264.3650528 | 264.368136 | 264.3595264 | 264.1194192 | 261.1038824 |
| 264.386232 | 264.3858688 | 264.3680528 | 264.370136 | 264.3635264 | 264.1224192 | 261.1068824 |
| 264.384232 | 264.3848688 | 264.3680528 | 264.371136 | 264.3615264 | 264.1204192 | 261.1078824 |
| 264.389232 | 264.3898688 | 264.3710528 | 264.375136 | 264.3655264 | 264.1234192 | 261.1118824 |
| 264.389232 | 264.3878688 | 264.3690528 | 264.374136 | 264.3645264 | 264.1274192 | 261.1118824 |
| 264.391232 | 264.3878688 | 264.3700528 | 264.374136 | 264.3655264 | 264.1244192 | 261.1118824 |
| 264.390232 | 264.3898688 | 264.3690528 | 264.376136 | 264.3675264 | 264.1254192 | 261.1138824 |
| 264.391232 | 264.3918688 | 264.3710528 | 264.378136 | 264.3665264 | 264.1264192 | 261.1158824 |
| 264.392232 | 264.3908688 | 264.3720528 | 264.377136 | 264.3675264 | 264.1274192 | 261.1138824 |
| 264.393232 | 264.3928688 | 264.3710528 | 264.379136 | 264.3675264 | 264.1274192 | 261.1148824 |
| 264.392232 | 264.3948688 | 264.3720528 | 264.378136 | 264.3685264 | 264.1274192 | 261.1158824 |
| 264.393232 | 264.3928688 | 264.3730528 | 264.380136 | 264.3695264 | 264.1294192 | 261.1178824 |
| 264.392232 | 264.3918688 | 264.3720528 | 264.379136 | 264.3705264 | 264.1294192 | 261.1168824 |
| 264.395232 | 264.3938688 | 264.3740528 | 264.380136 | 264.3705264 | 264.1314192 | 261.1188824 |
| 264.395232 | 264.3958688 | 264.3750528 | 264.380136 | 264.3705264 | 264.1294192 | 261.1188824 |
| 264.396232 | 264.3948688 | 264.3740528 | 264.380136 | 264.3715264 | 264.1304192 | 261.1198824 |
| 264.395232 | 264.3968688 | 264.3760528 | 264.381136 | 264.3735264 | 264.1314192 | 261.1198824 |
| 264.396232 | 264.3958688 | 264.3750528 | 264.381136 | 264.3715264 | 264.1294192 | 261.1188824 |
| 264.395232 | 264.3958688 | 264.3760528 | 264.380136 | 264.3735264 | 264.1294192 | 261.1198824 |
| 264.395232 | 264.3978688 | 264.3760528 | 264.382136 | 264.3725264 | 264.1324192 | 261.1198824 |
| 264.394232 | 264.3948688 | 264.3740528 | 264.381136 | 264.3725264 | 264.1274192 | 261.1198824 |
| 264.393232 | 264.3948688 | 264.3780528 | 264.381136 | 264.3715264 | 264.1314192 | 261.1208824 |
| 264.396232 | 264.3938688 | 264.3770528 | 264.381136 | 264.3735264 | 264.1304192 | 261.1208824 |
| 264.394232 | 264.3958688 | 264.3770528 | 264.380136 | 264.3725264 | 264.1294192 | 261.1198824 |
| 264.393232 | 264.3948688 | 264.3760528 | 264.379136 | 264.3715264 | 264.1264192 | 261.1218824 |
| 264.393232 | 264.3948688 | 264.3760528 | 264.379136 | 264.3695264 | 264.1264192 | 261.1238824 |
| 264.394232 | 264.3958688 | 264.3770528 | 264.381136 | 264.3715264 | 264.1274192 | 261.1248824 |
| 264.395232 | 264.3948688 | 264.3760528 | 264.380136 | 264.3705264 | 264.1264192 | 261.1228824 |
| 264.392232 | 264.3958688 | 264.3790528 | 264.379136 | 264.3705264 | 264.1274192 | 261.1238824 |
| 264.395232 | 264.3978688 | 264.3810528 | 264.381136 | 264.3725264 | 264.1264192 | 261.1258824 |
| 264.394232 | 264.3978688 | 264.3800528 | 264.380136 | 264.3735264 | 264.1264192 | 261.1258824 |
| 264.394232 | 264.3968688 | 264.3800528 | 264.380136 | 264.3715264 | 264.1254192 | 261.1258824 |
| 264.393232 | 264.3958688 | 264.3780528 | 264.379136 | 264.3695264 | 264.1244192 | 261.1248824 |
| 264.394232 | 264.3978688 | 264.3820528 | 264.381136 | 264.3735264 | 264.1254192 | 261.1258824 |
| 264.393232 | 264.3968688 | 264.3810528 | 264.380136 | 264.3725264 | 264.1244192 | 261.1248824 |
| 264.394232 | 264.3968688 | 264.3810528 | 264.379136 | 264.3725264 | 264.1254192 | 261.1248824 |
| 264.393232 | 264.3938688 | 264.3800528 | 264.378136 | 264.3715264 | 264.1244192 | 261.1238824 |
| 264.391232 | 264.3928688 | 264.3790528 | 264.376136 | 264.3685264 | 264.1224192 | 261.1258824 |
| 264.393232 | 264.3938688 | 264.3810528 | 264.378136 | 264.3705264 | 264.1244192 | 261.1258824 |
| 264.392232 | 264.3948688 | 264.3810528 | 264.378136 | 264.3705264 | 264.1214192 | 261.1258824 |

|            |             |             |            |             |             |             |
|------------|-------------|-------------|------------|-------------|-------------|-------------|
| 264.390232 | 264.3928688 | 264.3800528 | 264.377136 | 264.3685264 | 264.1184192 | 261.1248824 |
| 264.392232 | 264.3948688 | 264.3800528 | 264.377136 | 264.3705264 | 264.1204192 | 261.1248824 |
| 264.391232 | 264.3928688 | 264.3800528 | 264.378136 | 264.3705264 | 264.1204192 | 261.1258824 |
| 264.394232 | 264.3958688 | 264.3820528 | 264.380136 | 264.3705264 | 264.1224192 | 261.1278824 |
| 264.392232 | 264.3938688 | 264.3810528 | 264.379136 | 264.3695264 | 264.1214192 | 261.1248824 |
| 264.392232 | 264.3948688 | 264.3830528 | 264.379136 | 264.3685264 | 264.1234192 | 261.1268824 |
| 264.391232 | 264.3928688 | 264.3820528 | 264.376136 | 264.3685264 | 264.1184192 | 261.1258824 |
| 264.390232 | 264.3938688 | 264.3800528 | 264.377136 | 264.3695264 | 264.1204192 | 261.1278824 |
| 264.391232 | 264.3938688 | 264.3840528 | 264.380136 | 264.3705264 | 264.1204192 | 261.1258824 |
| 264.392232 | 264.3948688 | 264.3830528 | 264.380136 | 264.3695264 | 264.1234192 | 261.1258824 |
| 264.392232 | 264.3958688 | 264.3850528 | 264.379136 | 264.3695264 | 264.1214192 | 261.1278824 |
| 264.394232 | 264.3978688 | 264.3840528 | 264.380136 | 264.3715264 | 264.1214192 | 261.1298824 |
| 264.394232 | 264.3958688 | 264.3840528 | 264.377136 | 264.3695264 | 264.1234192 | 261.1278824 |
| 264.394232 | 264.3978688 | 264.3850528 | 264.380136 | 264.3715264 | 264.1274192 | 261.1278824 |
| 264.393232 | 264.3948688 | 264.3840528 | 264.377136 | 264.3685264 | 264.1224192 | 261.1268824 |
| 264.392232 | 264.3938688 | 264.3840528 | 264.376136 | 264.3675264 | 264.1194192 | 261.1258824 |
| 264.392232 | 264.3938688 | 264.3840528 | 264.376136 | 264.3675264 | 264.1174192 | 261.1258824 |
| 264.393232 | 264.3948688 | 264.3840528 | 264.377136 | 264.3705264 | 264.1194192 | 261.1248824 |
| 264.393232 | 264.3948688 | 264.3850528 | 264.376136 | 264.3685264 | 264.1204192 | 261.1268824 |
| 264.391232 | 264.3968688 | 264.3870528 | 264.377136 | 264.3705264 | 264.1204192 | 261.1288824 |
| 264.390232 | 264.3948688 | 264.3860528 | 264.376136 | 264.3695264 | 264.1194192 | 261.1268824 |
| 264.392232 | 264.3938688 | 264.3850528 | 264.378136 | 264.3685264 | 264.1224192 | 261.1278824 |
| 264.391232 | 264.3938688 | 264.3850528 | 264.377136 | 264.3685264 | 264.1204192 | 261.1278824 |
| 264.391232 | 264.3938688 | 264.3850528 | 264.375136 | 264.3685264 | 264.1214192 | 261.1258824 |
| 264.391232 | 264.3938688 | 264.3850528 | 264.377136 | 264.3685264 | 264.1214192 | 261.1298824 |
| 264.391232 | 264.3918688 | 264.3870528 | 264.376136 | 264.3665264 | 264.1184192 | 261.1258824 |
| 264.391232 | 264.3928688 | 264.3850528 | 264.376136 | 264.3685264 | 264.1204192 | 261.1268824 |
| 264.390232 | 264.3938688 | 264.3860528 | 264.377136 | 264.3675264 | 264.1184192 | 261.1258824 |
| 264.389232 | 264.3908688 | 264.3850528 | 264.374136 | 264.3675264 | 264.1164192 | 261.1248824 |
| 264.392232 | 264.3938688 | 264.3860528 | 264.375136 | 264.3675264 | 264.1164192 | 261.1278824 |
| 264.389232 | 264.3918688 | 264.3850528 | 264.374136 | 264.3655264 | 264.1164192 | 261.1258824 |
| 264.389232 | 264.3908688 | 264.3870528 | 264.376136 | 264.3675264 | 264.1184192 | 261.1258824 |
| 264.388232 | 264.3898688 | 264.3850528 | 264.374136 | 264.3645264 | 264.1194192 | 261.1268824 |
| 264.391232 | 264.3928688 | 264.3870528 | 264.377136 | 264.3675264 | 264.1164192 | 261.1278824 |
| 264.390232 | 264.3908688 | 264.3840528 | 264.374136 | 264.3665264 | 264.1174192 | 261.1268824 |
| 264.390232 | 264.3928688 | 264.3850528 | 264.374136 | 264.3685264 | 264.1194192 | 261.1268824 |
| 264.390232 | 264.3928688 | 264.3870528 | 264.376136 | 264.3665264 | 264.1154192 | 261.1268824 |
| 264.389232 | 264.3918688 | 264.3860528 | 264.375136 | 264.3665264 | 264.1184192 | 261.1248824 |
| 264.388232 | 264.3898688 | 264.3850528 | 264.373136 | 264.3655264 | 264.1194192 | 261.1258824 |
| 264.391232 | 264.3918688 | 264.3880528 | 264.376136 | 264.3675264 | 264.1164192 | 261.1268824 |
| 264.388232 | 264.3888688 | 264.3840528 | 264.372136 | 264.3635264 | 264.1144192 | 261.1248824 |
| 264.387232 | 264.3888688 | 264.3840528 | 264.372136 | 264.3635264 | 264.1134192 | 261.1228824 |
| 264.388232 | 264.3908688 | 264.3860528 | 264.374136 | 264.3665264 | 264.1164192 | 261.1248824 |
| 264.389232 | 264.3888688 | 264.3860528 | 264.372136 | 264.3635264 | 264.1114192 | 261.1248824 |
| 264.386232 | 264.3898688 | 264.3850528 | 264.371136 | 264.3625264 | 264.1134192 | 261.1238824 |
| 264.386232 | 264.3898688 | 264.3850528 | 264.370136 | 264.3625264 | 264.1124192 | 261.1238824 |
| 264.385232 | 264.3898688 | 264.3850528 | 264.370136 | 264.3625264 | 264.1144192 | 261.1258824 |

|            |             |             |            |             |             |             |
|------------|-------------|-------------|------------|-------------|-------------|-------------|
| 264.383232 | 264.3878688 | 264.3840528 | 264.370136 | 264.3615264 | 264.1114192 | 261.1238824 |
| 264.383232 | 264.3878688 | 264.3860528 | 264.370136 | 264.3615264 | 264.1114192 | 261.1238824 |
| 264.385232 | 264.3898688 | 264.3860528 | 264.369136 | 264.3635264 | 264.1114192 | 261.1228824 |
| 264.385232 | 264.3888688 | 264.3830528 | 264.369136 | 264.3615264 | 264.1104192 | 261.1268824 |
| 264.385232 | 264.3888688 | 264.3840528 | 264.370136 | 264.3625264 | 264.1134192 | 261.1268824 |
| 264.384232 | 264.3878688 | 264.3850528 | 264.368136 | 264.3615264 | 264.1154192 | 261.1258824 |
| 264.383232 | 264.3868688 | 264.3850528 | 264.369136 | 264.3605264 | 264.1114192 | 261.1228824 |
| 264.384232 | 264.3888688 | 264.3860528 | 264.369136 | 264.3625264 | 264.1134192 | 261.1248824 |
| 264.383232 | 264.3868688 | 264.3830528 | 264.370136 | 264.3615264 | 264.1124192 | 261.1238824 |
| 264.385232 | 264.3878688 | 264.3850528 | 264.368136 | 264.3595264 | 264.1094192 | 261.1238824 |
| 264.384232 | 264.3878688 | 264.3840528 | 264.369136 | 264.3585264 | 264.1094192 | 261.1208824 |
| 264.381232 | 264.3868688 | 264.3830528 | 264.367136 | 264.3575264 | 264.1094192 | 261.1228824 |
| 264.383232 | 264.3848688 | 264.3840528 | 264.368136 | 264.3585264 | 264.1114192 | 261.1218824 |
| 264.382232 | 264.3858688 | 264.3840528 | 264.366136 | 264.3585264 | 264.1064192 | 261.1248824 |
| 264.382232 | 264.3868688 | 264.3840528 | 264.367136 | 264.3585264 | 264.1084192 | 261.1218824 |
| 264.381232 | 264.3858688 | 264.3810528 | 264.365136 | 264.3575264 | 264.1074192 | 261.1208824 |
| 264.380232 | 264.3848688 | 264.3840528 | 264.364136 | 264.3565264 | 264.1074192 | 261.1228824 |
| 264.380232 | 264.3848688 | 264.3820528 | 264.364136 | 264.3565264 | 264.1084192 | 261.1218824 |
| 264.379232 | 264.3838688 | 264.3810528 | 264.365136 | 264.3555264 | 264.1074192 | 261.1198824 |
| 264.379232 | 264.3848688 | 264.3850528 | 264.366136 | 264.3575264 | 264.1104192 | 261.1218824 |
| 264.382232 | 264.3838688 | 264.3840528 | 264.367136 | 264.3575264 | 264.1074192 | 261.1208824 |
| 264.383232 | 264.3858688 | 264.3810528 | 264.369136 | 264.3605264 | 264.1064192 | 261.1208824 |
| 264.383232 | 264.3848688 | 264.3810528 | 264.371136 | 264.3605264 | 264.1074192 | 261.1178824 |
| 264.387232 | 264.3888688 | 264.3830528 | 264.372136 | 264.3625264 | 264.1124192 | 261.1218824 |
| 264.386232 | 264.3858688 | 264.3820528 | 264.371136 | 264.3615264 | 264.1114192 | 261.1198824 |
| 264.388232 | 264.3898688 | 264.3850528 | 264.374136 | 264.3625264 | 264.1134192 | 261.1198824 |
| 264.388232 | 264.3898688 | 264.3840528 | 264.373136 | 264.3645264 | 264.1154192 | 261.1198824 |
| 264.386232 | 264.3868688 | 264.3820528 | 264.373136 | 264.3635264 | 264.1154192 | 261.1168824 |
| 264.388232 | 264.3898688 | 264.3840528 | 264.374136 | 264.3625264 | 264.1204192 | 261.1198824 |
| 264.390232 | 264.3898688 | 264.3840528 | 264.373136 | 264.3645264 | 264.1194192 | 261.1208824 |
| 264.390232 | 264.3898688 | 264.3840528 | 264.373136 | 264.3635264 | 264.1174192 | 261.1188824 |
| 264.391232 | 264.3918688 | 264.3830528 | 264.376136 | 264.3675264 | 264.1224192 | 261.1198824 |
| 264.389232 | 264.3898688 | 264.3850528 | 264.376136 | 264.3665264 | 264.1174192 | 261.1188824 |
| 264.389232 | 264.3908688 | 264.3820528 | 264.373136 | 264.3645264 | 264.1184192 | 261.1188824 |
| 264.389232 | 264.3908688 | 264.3840528 | 264.374136 | 264.3665264 | 264.1174192 | 261.1188824 |
| 264.389232 | 264.3908688 | 264.3850528 | 264.375136 | 264.3645264 | 264.1164192 | 261.1188824 |
| 264.391232 | 264.3888688 | 264.3850528 | 264.375136 | 264.3675264 | 264.1164192 | 261.1188824 |
| 264.391232 | 264.3918688 | 264.3870528 | 264.377136 | 264.3655264 | 264.1164192 | 261.1168824 |
| 264.388232 | 264.3908688 | 264.3840528 | 264.374136 | 264.3665264 | 264.1184192 | 261.1148824 |
| 264.389232 | 264.3908688 | 264.3850528 | 264.374136 | 264.3655264 | 264.1144192 | 261.1168824 |
| 264.388232 | 264.3908688 | 264.3850528 | 264.376136 | 264.3665264 | 264.1184192 | 261.1168824 |
| 264.389232 | 264.3918688 | 264.3860528 | 264.375136 | 264.3675264 | 264.1194192 | 261.1178824 |
| 264.386232 | 264.3898688 | 264.3850528 | 264.374136 | 264.3665264 | 264.1174192 | 261.1188824 |
| 264.388232 | 264.3928688 | 264.3850528 | 264.374136 | 264.3675264 | 264.1184192 | 261.1188824 |
| 264.390232 | 264.3938688 | 264.3860528 | 264.377136 | 264.3685264 | 264.1214192 | 261.1198824 |
| 264.391232 | 264.3918688 | 264.3870528 | 264.377136 | 264.3675264 | 264.1204192 | 261.1198824 |
| 264.389232 | 264.3918688 | 264.3870528 | 264.376136 | 264.3665264 | 264.1184192 | 261.1188824 |



|            |             |             |            |             |             |             |
|------------|-------------|-------------|------------|-------------|-------------|-------------|
| 264.388232 | 264.3908688 | 264.3870528 | 264.374136 | 264.3665264 | 264.1154192 | 261.1188824 |
| 264.389232 | 264.3918688 | 264.3870528 | 264.375136 | 264.3675264 | 264.1184192 | 261.1188824 |
| 264.388232 | 264.3908688 | 264.3870528 | 264.374136 | 264.3665264 | 264.1174192 | 261.1188824 |
| 264.388232 | 264.3908688 | 264.3870528 | 264.374136 | 264.3645264 | 264.1174192 | 261.1168824 |
| 264.386232 | 264.3908688 | 264.3860528 | 264.373136 | 264.3645264 | 264.1154192 | 261.1168824 |
| 264.386232 | 264.3908688 | 264.3860528 | 264.373136 | 264.3645264 | 264.1174192 | 261.1188824 |
| 264.385232 | 264.3908688 | 264.3840528 | 264.373136 | 264.3645264 | 264.1154192 | 261.1168824 |
| 264.386232 | 264.3888688 | 264.3860528 | 264.371136 | 264.3645264 | 264.1154192 | 261.1188824 |
| 264.386232 | 264.3888688 | 264.3880528 | 264.371136 | 264.3645264 | 264.1134192 | 261.1188824 |
| 264.386232 | 264.3908688 | 264.3880528 | 264.373136 | 264.3625264 | 264.1134192 | 261.1218824 |
| 264.386232 | 264.3908688 | 264.3860528 | 264.373136 | 264.3645264 | 264.1154192 | 261.1208824 |
| 264.383232 | 264.3878688 | 264.3860528 | 264.370136 | 264.3615264 | 264.1124192 | 261.1188824 |
| 264.383232 | 264.3898688 | 264.3880528 | 264.371136 | 264.3635264 | 264.1164192 | 261.1188824 |
| 264.385232 | 264.3898688 | 264.3860528 | 264.371136 | 264.3635264 | 264.1144192 | 261.1188824 |
| 264.387232 | 264.3898688 | 264.3880528 | 264.371136 | 264.3635264 | 264.1164192 | 261.1218824 |
| 264.385232 | 264.3898688 | 264.3860528 | 264.370136 | 264.3615264 | 264.1124192 | 261.1188824 |
| 264.385232 | 264.3878688 | 264.3880528 | 264.371136 | 264.3635264 | 264.1164192 | 261.1208824 |
| 264.384232 | 264.3868688 | 264.3870528 | 264.370136 | 264.3625264 | 264.1154192 | 261.1208824 |
| 264.386232 | 264.3898688 | 264.3870528 | 264.372136 | 264.3635264 | 264.1154192 | 261.1208824 |
| 264.385232 | 264.3898688 | 264.3880528 | 264.371136 | 264.3635264 | 264.1144192 | 261.1228824 |
| 264.385232 | 264.3898688 | 264.3880528 | 264.371136 | 264.3635264 | 264.1144192 | 261.1228824 |
| 264.384232 | 264.3878688 | 264.3850528 | 264.368136 | 264.3625264 | 264.1094192 | 261.1208824 |
| 264.386232 | 264.3898688 | 264.3870528 | 264.368136 | 264.3625264 | 264.1154192 | 261.1228824 |
| 264.384232 | 264.3878688 | 264.3860528 | 264.369136 | 264.3625264 | 264.1134192 | 261.1228824 |
| 264.385232 | 264.3868688 | 264.3840528 | 264.370136 | 264.3605264 | 264.1124192 | 261.1198824 |
| 264.383232 | 264.3868688 | 264.3860528 | 264.370136 | 264.3625264 | 264.1144192 | 261.1218824 |
| 264.385232 | 264.3868688 | 264.3850528 | 264.369136 | 264.3595264 | 264.1104192 | 261.1198824 |
| 264.386232 | 264.3898688 | 264.3840528 | 264.370136 | 264.3605264 | 264.1154192 | 261.1228824 |
| 264.383232 | 264.3868688 | 264.3860528 | 264.371136 | 264.3615264 | 264.1104192 | 261.1218824 |
| 264.384232 | 264.3888688 | 264.3860528 | 264.369136 | 264.3625264 | 264.1124192 | 261.1218824 |
| 264.384232 | 264.3868688 | 264.3860528 | 264.370136 | 264.3605264 | 264.1124192 | 261.1198824 |
| 264.382232 | 264.3868688 | 264.3840528 | 264.369136 | 264.3605264 | 264.1144192 | 261.1218824 |
| 264.383232 | 264.3888688 | 264.3860528 | 264.369136 | 264.3605264 | 264.1144192 | 261.1198824 |
| 264.383232 | 264.3868688 | 264.3860528 | 264.369136 | 264.3615264 | 264.1124192 | 261.1218824 |
| 264.381232 | 264.3888688 | 264.3860528 | 264.369136 | 264.3615264 | 264.1124192 | 261.1198824 |
| 264.384232 | 264.3888688 | 264.3860528 | 264.372136 | 264.3605264 | 264.1144192 | 261.1218824 |
| 264.380232 | 264.3858688 | 264.3850528 | 264.368136 | 264.3605264 | 264.1114192 | 261.1188824 |
| 264.383232 | 264.3888688 | 264.3860528 | 264.371136 | 264.3615264 | 264.1124192 | 261.1238824 |
| 264.381232 | 264.3848688 | 264.3840528 | 264.365136 | 264.3585264 | 264.1104192 | 261.1188824 |
| 264.379232 | 264.3848688 | 264.3840528 | 264.365136 | 264.3575264 | 264.1104192 | 261.1188824 |
| 264.379232 | 264.3828688 | 264.3840528 | 264.363136 | 264.3555264 | 264.1104192 | 261.1208824 |
| 264.378232 | 264.3828688 | 264.3870528 | 264.365136 | 264.3545264 | 264.1094192 | 261.1208824 |
| 264.377232 | 264.3848688 | 264.3860528 | 264.365136 | 264.3555264 | 264.1064192 | 261.1208824 |
| 264.377232 | 264.3818688 | 264.3840528 | 264.363136 | 264.3555264 | 264.1074192 | 261.1208824 |
| 264.377232 | 264.3818688 | 264.3860528 | 264.363136 | 264.3555264 | 264.1064192 | 261.1208824 |
| 264.376232 | 264.3798688 | 264.3840528 | 264.363136 | 264.3535264 | 264.1054192 | 261.1198824 |
| 264.374232 | 264.3788688 | 264.3830528 | 264.360136 | 264.3525264 | 264.1024192 | 261.1178824 |

|            |             |             |            |             |             |             |
|------------|-------------|-------------|------------|-------------|-------------|-------------|
| 264.376232 | 264.3818688 | 264.3840528 | 264.363136 | 264.3535264 | 264.1034192 | 261.1208824 |
| 264.376232 | 264.3788688 | 264.3830528 | 264.360136 | 264.3525264 | 264.1004192 | 261.1198824 |
| 264.376232 | 264.3788688 | 264.3850528 | 264.360136 | 264.3505264 | 264.1024192 | 261.1198824 |
| 264.371232 | 264.3788688 | 264.3810528 | 264.359136 | 264.3495264 | 264.1024192 | 261.1168824 |
| 264.376232 | 264.3788688 | 264.3810528 | 264.359136 | 264.3505264 | 264.1024192 | 261.1198824 |
| 264.371232 | 264.3768688 | 264.3810528 | 264.359136 | 264.3495264 | 264.1024192 | 261.1198824 |
| 264.374232 | 264.3768688 | 264.3810528 | 264.360136 | 264.3505264 | 264.1024192 | 261.1178824 |
| 264.371232 | 264.3758688 | 264.3800528 | 264.356136 | 264.3495264 | 264.1024192 | 261.1178824 |
| 264.373232 | 264.3758688 | 264.3800528 | 264.356136 | 264.3495264 | 264.1024192 | 261.1178824 |
| 264.373232 | 264.3788688 | 264.3810528 | 264.357136 | 264.3475264 | 264.1004192 | 261.1198824 |
| 264.371232 | 264.3758688 | 264.3800528 | 264.356136 | 264.3465264 | 264.0974192 | 261.1188824 |
| 264.373232 | 264.3758688 | 264.3810528 | 264.356136 | 264.3475264 | 264.0994192 | 261.1168824 |
| 264.369232 | 264.3758688 | 264.3810528 | 264.356136 | 264.3465264 | 264.0994192 | 261.1168824 |
| 264.372232 | 264.3758688 | 264.3810528 | 264.357136 | 264.3455264 | 264.1004192 | 261.1158824 |
| 264.371232 | 264.3758688 | 264.3830528 | 264.356136 | 264.3465264 | 264.1004192 | 261.1168824 |
| 264.369232 | 264.3738688 | 264.3800528 | 264.354136 | 264.3445264 | 264.0974192 | 261.1168824 |
| 264.371232 | 264.3738688 | 264.3800528 | 264.354136 | 264.3445264 | 264.0954192 | 261.1148824 |
| 264.369232 | 264.3738688 | 264.3800528 | 264.353136 | 264.3445264 | 264.0974192 | 261.1148824 |
| 264.367232 | 264.3728688 | 264.3780528 | 264.354136 | 264.3425264 | 264.0974192 | 261.1148824 |
| 264.367232 | 264.3738688 | 264.3780528 | 264.352136 | 264.3435264 | 264.0984192 | 261.1148824 |
| 264.368232 | 264.3738688 | 264.3790528 | 264.352136 | 264.3435264 | 264.0964192 | 261.1148824 |
| 264.370232 | 264.3748688 | 264.3800528 | 264.355136 | 264.3465264 | 264.0954192 | 261.1158824 |
| 264.367232 | 264.3708688 | 264.3780528 | 264.352136 | 264.3425264 | 264.0944192 | 261.1118824 |
| 264.367232 | 264.3718688 | 264.3770528 | 264.352136 | 264.3435264 | 264.0964192 | 261.1108824 |
| 264.368232 | 264.3718688 | 264.3790528 | 264.354136 | 264.3435264 | 264.0974192 | 261.1148824 |
| 264.367232 | 264.3718688 | 264.3770528 | 264.354136 | 264.3415264 | 264.0984192 | 261.1128824 |
| 264.367232 | 264.3708688 | 264.3790528 | 264.352136 | 264.3435264 | 264.0984192 | 261.1128824 |
| 264.367232 | 264.3718688 | 264.3770528 | 264.352136 | 264.3435264 | 264.0984192 | 261.1148824 |
| 264.365232 | 264.3708688 | 264.3770528 | 264.352136 | 264.3415264 | 264.0984192 | 261.1108824 |
| 264.366232 | 264.3718688 | 264.3770528 | 264.352136 | 264.3435264 | 264.0954192 | 261.1108824 |
| 264.366232 | 264.3718688 | 264.3770528 | 264.352136 | 264.3415264 | 264.0954192 | 261.1108824 |
| 264.368232 | 264.3728688 | 264.3760528 | 264.355136 | 264.3445264 | 264.0974192 | 261.1128824 |
| 264.366232 | 264.3708688 | 264.3770528 | 264.352136 | 264.3435264 | 264.0944192 | 261.1098824 |
| 264.364232 | 264.3708688 | 264.3770528 | 264.352136 | 264.3435264 | 264.0954192 | 261.1108824 |
| 264.368232 | 264.3698688 | 264.3760528 | 264.353136 | 264.3425264 | 264.0954192 | 261.1128824 |
| 264.365232 | 264.3698688 | 264.3760528 | 264.353136 | 264.3405264 | 264.0984192 | 261.11      |

|            |             |             |            |             |             |             |
|------------|-------------|-------------|------------|-------------|-------------|-------------|
| 264.363232 | 264.3668688 | 264.3720528 | 264.348136 | 264.3385264 | 264.0964192 | 261.1068824 |
| 264.363232 | 264.3678688 | 264.3730528 | 264.349136 | 264.3365264 | 264.0964192 | 261.1068824 |
| 264.363232 | 264.3668688 | 264.3730528 | 264.348136 | 264.3365264 | 264.0924192 | 261.1068824 |
| 264.363232 | 264.3668688 | 264.3730528 | 264.349136 | 264.3365264 | 264.0944192 | 261.1068824 |
| 264.362232 | 264.3678688 | 264.3750528 | 264.351136 | 264.3395264 | 264.0934192 | 261.1068824 |
| 264.361232 | 264.3648688 | 264.3710528 | 264.348136 | 264.3365264 | 264.0964192 | 261.1048824 |
| 264.362232 | 264.3668688 | 264.3710528 | 264.349136 | 264.3365264 | 264.0934192 | 261.1068824 |
| 264.364232 | 264.3678688 | 264.3730528 | 264.351136 | 264.3375264 | 264.0934192 | 261.1048824 |
| 264.362232 | 264.3658688 | 264.3710528 | 264.351136 | 264.3375264 | 264.0914192 | 261.1048824 |
| 264.363232 | 264.3678688 | 264.3740528 | 264.352136 | 264.3375264 | 264.0934192 | 261.1058824 |
| 264.362232 | 264.3678688 | 264.3730528 | 264.351136 | 264.3375264 | 264.0954192 | 261.1068824 |
| 264.363232 | 264.3678688 | 264.3720528 | 264.350136 | 264.3395264 | 264.0964192 | 261.1078824 |
| 264.363232 | 264.3678688 | 264.3720528 | 264.350136 | 264.3385264 | 264.0964192 | 261.1058824 |
| 264.362232 | 264.3658688 | 264.3720528 | 264.348136 | 264.3355264 | 264.0934192 | 261.1028824 |
| 264.362232 | 264.3658688 | 264.3700528 | 264.348136 | 264.3355264 | 264.0944192 | 261.1028824 |
| 264.363232 | 264.3658688 | 264.3720528 | 264.348136 | 264.3375264 | 264.0924192 | 261.1048824 |
| 264.361232 | 264.3658688 | 264.3720528 | 264.348136 | 264.3375264 | 264.0924192 | 261.1058824 |
| 264.359232 | 264.3658688 | 264.3700528 | 264.347136 | 264.3375264 | 264.0924192 | 261.1048824 |
| 264.361232 | 264.3658688 | 264.3700528 | 264.348136 | 264.3375264 | 264.0924192 | 261.1028824 |
| 264.361232 | 264.3658688 | 264.3700528 | 264.348136 | 264.3385264 | 264.0964192 | 261.1048824 |
| 264.364232 | 264.3668688 | 264.3700528 | 264.350136 | 264.3385264 | 264.0944192 | 261.1078824 |
| 264.364232 | 264.3668688 | 264.3720528 | 264.350136 | 264.3385264 | 264.0944192 | 261.1038824 |
| 264.366232 | 264.3668688 | 264.3710528 | 264.351136 | 264.3395264 | 264.0934192 | 261.1038824 |
| 264.364232 | 264.3658688 | 264.3690528 | 264.349136 | 264.3385264 | 264.0954192 | 261.1038824 |
| 264.365232 | 264.3678688 | 264.3700528 | 264.352136 | 264.3395264 | 264.0924192 | 261.1038824 |
| 264.365232 | 264.3668688 | 264.3690528 | 264.351136 | 264.3375264 | 264.0964192 | 261.1038824 |
| 264.365232 | 264.3668688 | 264.3690528 | 264.351136 | 264.3375264 | 264.0944192 | 261.0998824 |
| 264.366232 | 264.3698688 | 264.3700528 | 264.352136 | 264.3405264 | 264.0994192 | 261.1028824 |
| 264.361232 | 264.3648688 | 264.3680528 | 264.349136 | 264.3355264 | 264.0964192 | 261.0998824 |
| 264.364232 | 264.3678688 | 264.3690528 | 264.351136 | 264.3405264 | 264.0964192 | 261.1028824 |
| 264.363232 | 264.3678688 | 264.3710528 | 264.351136 | 264.3415264 | 264.0984192 | 261.1028824 |
| 264.365232 | 264.3678688 | 264.3700528 | 264.353136 | 264.3415264 | 264.0984192 | 261.1028824 |
| 264.364232 | 264.3668688 | 264.3700528 | 264.352136 | 264.3405264 | 264.0974192 | 261.1038824 |
| 264.364232 | 264.3688688 | 264.3700528 | 264.351136 | 264.3405264 | 264.0974192 | 261.1018824 |
| 264.366232 | 264.3678688 | 264.3700528 | 264.353136 | 264.3415264 | 264.0964192 | 261.1048824 |
| 264.366232 | 264.3678688 | 264.3720528 | 264.350136 | 264.3405264 | 264.0974192 | 261.1028824 |
| 264.364232 | 264.3658688 | 264.3700528 | 264.351136 | 264.3385264 | 264.0964192 | 261.1008824 |
| 264.362232 | 264.3648688 | 264.3680528 | 264.348136 | 264.3375264 | 264.0964192 | 261.1028824 |
| 264.361232 | 264.3658688 | 264.3670528 | 264.348136 | 264.3385264 | 264.0964192 | 261.0988824 |
| 264.365232 | 264.3658688 | 264.3710528 | 264.350136 | 264.3405264 | 264.0984192 | 261.1008824 |
| 264.361232 | 264.3668688 | 264.3710528 | 264.350136 | 264.3385264 | 264.0964192 | 261.0998824 |
| 264.363232 | 264.3668688 | 264.3690528 | 264.350136 | 264.3385264 | 264.0964192 | 261.1028824 |
| 264.362232 | 264.3648688 | 264.3700528 | 264.349136 | 264.3375264 | 264.0974192 | 261.1008824 |
| 264.360232 | 264.3648688 | 264.3680528 | 264.346136 | 264.3365264 | 264.0964192 | 261.0968824 |
| 264.362232 | 264.3668688 | 264.3690528 | 264.350136 | 264.3385264 | 264.0974192 | 261.1008824 |
| 264.364232 | 264.3668688 | 264.3680528 | 264.348136 | 264.3385264 | 264.0954192 | 261.1028824 |
| 264.360232 | 264.3648688 | 264.3700528 | 264.348136 | 264.3365264 | 264.0964192 | 261.1008824 |

|            |             |             |            |             |             |             |
|------------|-------------|-------------|------------|-------------|-------------|-------------|
| 264.359232 | 264.3648688 | 264.3690528 | 264.346136 | 264.3355264 | 264.0964192 | 261.1008824 |
| 264.360232 | 264.3658688 | 264.3700528 | 264.347136 | 264.3345264 | 264.0954192 | 261.1018824 |
| 264.363232 | 264.3658688 | 264.3680528 | 264.347136 | 264.3345264 | 264.0934192 | 261.1028824 |
| 264.359232 | 264.3638688 | 264.3680528 | 264.345136 | 264.3345264 | 264.0944192 | 261.1008824 |
| 264.359232 | 264.3638688 | 264.3680528 | 264.343136 | 264.3325264 | 264.0904192 | 261.1008824 |
| 264.358232 | 264.3638688 | 264.3700528 | 264.346136 | 264.3355264 | 264.0914192 | 261.1028824 |
| 264.358232 | 264.3608688 | 264.3670528 | 264.343136 | 264.3335264 | 264.0884192 | 261.1008824 |
| 264.361232 | 264.3648688 | 264.3710528 | 264.347136 | 264.3345264 | 264.0904192 | 261.1028824 |
| 264.358232 | 264.3618688 | 264.3660528 | 264.344136 | 264.3335264 | 264.0894192 | 261.1018824 |
| 264.359232 | 264.3628688 | 264.3690528 | 264.344136 | 264.3325264 | 264.0934192 | 261.0998824 |
| 264.357232 | 264.3618688 | 264.3670528 | 264.342136 | 264.3315264 | 264.0864192 | 261.0998824 |
| 264.359232 | 264.3618688 | 264.3670528 | 264.345136 | 264.3325264 | 264.0884192 | 261.1028824 |
| 264.357232 | 264.3598688 | 264.3670528 | 264.342136 | 264.3305264 | 264.0884192 | 261.1018824 |
| 264.358232 | 264.3618688 | 264.3670528 | 264.343136 | 264.3325264 | 264.0894192 | 261.0998824 |
| 264.356232 | 264.3608688 | 264.3660528 | 264.343136 | 264.3315264 | 264.0894192 | 261.0998824 |
| 264.357232 | 264.3608688 | 264.3680528 | 264.345136 | 264.3335264 | 264.0904192 | 261.1028824 |
| 264.359232 | 264.3608688 | 264.3660528 | 264.344136 | 264.3345264 | 264.0904192 | 261.1038824 |
| 264.357232 | 264.3608688 | 264.3660528 | 264.345136 | 264.3315264 | 264.0874192 | 261.1028824 |
| 264.356232 | 264.3578688 | 264.3650528 | 264.341136 | 264.3315264 | 264.0874192 | 261.0998824 |
| 264.356232 | 264.3578688 | 264.3660528 | 264.341136 | 264.3295264 | 264.0854192 | 261.0988824 |
| 264.358232 | 264.3608688 | 264.3690528 | 264.342136 | 264.3325264 | 264.0894192 | 261.1038824 |
| 264.356232 | 264.3598688 | 264.3660528 | 264.340136 | 264.3315264 | 264.0884192 | 261.1008824 |
| 264.356232 | 264.3598688 | 264.3660528 | 264.343136 | 264.3295264 | 264.0924192 | 261.0988824 |
| 264.356232 | 264.3598688 | 264.3660528 | 264.341136 | 264.3295264 | 264.0914192 | 261.1008824 |
| 264.356232 | 264.3598688 | 264.3660528 | 264.341136 | 264.3295264 | 264.0894192 | 261.1008824 |
| 264.354232 | 264.3578688 | 264.3660528 | 264.340136 | 264.3285264 | 264.0854192 | 261.0998824 |
| 264.356232 | 264.3578688 | 264.3650528 | 264.341136 | 264.3295264 | 264.0894192 | 261.0998824 |
| 264.353232 | 264.3568688 | 264.3640528 | 264.339136 | 264.3275264 | 264.0844192 | 261.0978824 |
| 264.355232 | 264.3568688 | 264.3670528 | 264.340136 | 264.3285264 | 264.0884192 | 261.1008824 |
| 264.355232 | 264.3578688 | 264.3670528 | 264.340136 | 264.3285264 | 264.0844192 | 261.0998824 |
| 264.353232 | 264.3578688 | 264.3650528 | 264.339136 | 264.3275264 | 264.0864192 | 261.0978824 |
| 264.356232 | 264.3608688 | 264.3660528 | 264.341136 | 264.3295264 | 264.0874192 | 261.1008824 |
| 264.354232 | 264.3578688 | 264.3660528 | 264.340136 | 264.3285264 | 264.0874192 | 261.1008824 |
| 264.352232 | 264.3568688 | 264.3630528 | 264.340136 | 264.3285264 | 264.0874192 | 261.0978824 |
| 264.354232 | 264.3578688 | 264.3630528 | 264.338136 | 264.3285264 | 264.0854192 | 261.0988824 |
| 264.354232 | 264.3578688 | 264.3640528 | 264.340136 | 264.3265264 | 264.0854192 | 261.0988824 |
| 264.352232 | 264.3568688 | 264.3630528 | 264.338136 | 264.3265264 | 264.0874192 | 261.0988824 |
| 264.352232 | 264.3548688 | 264.3630528 | 264.336136 | 264.3265264 | 264.0834192 | 261.0988824 |
| 264.353232 | 264.3558688 | 264.3620528 | 264.340136 | 264.3265264 | 264.0864192 | 261.1008824 |
| 264.352232 | 264.3558688 | 264.3610528 | 264.340136 | 264.3265264 | 264.0854192 | 261.0978824 |
| 264.350232 | 264.3548688 | 264.3630528 | 264.336136 | 264.3265264 | 264.0834192 | 261.0958824 |
| 264.353232 | 264.3558688 | 264.3620528 | 264.338136 | 264.3275264 | 264.0864192 | 261.0988824 |
| 264.351232 | 264.3558688 | 264.3620528 | 264.336136 | 264.3265264 | 264.0864192 | 261.0958824 |
| 264.354232 | 264.3588688 | 264.3650528 | 264.339136 | 264.3285264 | 264.0844192 | 261.0998824 |
| 264.352232 | 264.3558688 | 264.3630528 | 264.337136 | 264.3275264 | 264.0864192 | 261.0968824 |
| 264.352232 | 264.3558688 | 264.3630528 | 264.337136 | 264.3275264 | 264.0874192 | 261.0968824 |
| 264.352232 | 264.3538688 | 264.3610528 | 264.336136 | 264.3235264 | 264.0844192 | 261.0988824 |

|            |             |             |            |             |             |             |
|------------|-------------|-------------|------------|-------------|-------------|-------------|
| 264.352232 | 264.3538688 | 264.3610528 | 264.337136 | 264.3255264 | 264.0864192 | 261.0968824 |
| 264.354232 | 264.3558688 | 264.3630528 | 264.339136 | 264.3265264 | 264.0894192 | 261.0988824 |
| 264.350232 | 264.3538688 | 264.3610528 | 264.334136 | 264.3235264 | 264.0864192 | 261.0948824 |
| 264.350232 | 264.3538688 | 264.3590528 | 264.334136 | 264.3255264 | 264.0834192 | 261.0948824 |
| 264.351232 | 264.3548688 | 264.3610528 | 264.337136 | 264.3245264 | 264.0854192 | 261.0978824 |
| 264.351232 | 264.3538688 | 264.3610528 | 264.335136 | 264.3265264 | 264.0854192 | 261.0948824 |
| 264.350232 | 264.3538688 | 264.3590528 | 264.335136 | 264.3265264 | 264.0854192 | 261.0968824 |
| 264.349232 | 264.3548688 | 264.3620528 | 264.337136 | 264.3265264 | 264.0824192 | 261.0958824 |
| 264.352232 | 264.3568688 | 264.3620528 | 264.337136 | 264.3255264 | 264.0884192 | 261.0958824 |
| 264.351232 | 264.3528688 | 264.3600528 | 264.335136 | 264.3245264 | 264.0824192 | 261.0948824 |
| 264.352232 | 264.3548688 | 264.3600528 | 264.337136 | 264.3235264 | 264.0884192 | 261.0928824 |
| 264.352232 | 264.3558688 | 264.3600528 | 264.336136 | 264.3265264 | 264.0834192 | 261.0958824 |
| 264.349232 | 264.3548688 | 264.3600528 | 264.335136 | 264.3235264 | 264.0824192 | 261.0908824 |
| 264.351232 | 264.3548688 | 264.3620528 | 264.337136 | 264.3255264 | 264.0844192 | 261.0948824 |
| 264.351232 | 264.3528688 | 264.3600528 | 264.337136 | 264.3235264 | 264.0844192 | 261.0948824 |
| 264.350232 | 264.3528688 | 264.3600528 | 264.338136 | 264.3255264 | 264.0834192 | 261.0938824 |
| 264.352232 | 264.3558688 | 264.3610528 | 264.338136 | 264.3265264 | 264.0874192 | 261.0938824 |
| 264.351232 | 264.3528688 | 264.3600528 | 264.337136 | 264.3235264 | 264.0864192 | 261.0928824 |
| 264.352232 | 264.3548688 | 264.3600528 | 264.335136 | 264.3235264 | 264.0834192 | 261.0938824 |
| 264.350232 | 264.3528688 | 264.3600528 | 264.335136 | 264.3235264 | 264.0834192 | 261.0938824 |
| 264.347232 | 264.3528688 | 264.3580528 | 264.335136 | 264.3235264 | 264.0824192 | 261.0948824 |
| 264.348232 | 264.3518688 | 264.3580528 | 264.335136 | 264.3235264 | 264.0824192 | 261.0928824 |
| 264.349232 | 264.3498688 | 264.3580528 | 264.333136 | 264.3225264 | 264.0844192 | 261.0908824 |
| 264.350232 | 264.3528688 | 264.3590528 | 264.338136 | 264.3235264 | 264.0854192 | 261.0938824 |
| 264.349232 | 264.3538688 | 264.3590528 | 264.334136 | 264.3245264 | 264.0854192 | 261.0908824 |
| 264.348232 | 264.3518688 | 264.3580528 | 264.335136 | 264.3235264 | 264.0804192 | 261.0928824 |
| 264.348232 | 264.3518688 | 264.3580528 | 264.333136 | 264.3215264 | 264.0804192 | 261.0908824 |
| 264.348232 | 264.3518688 | 264.3580528 | 264.335136 | 264.3235264 | 264.0834192 | 261.0928824 |
| 264.347232 | 264.3518688 | 264.3580528 | 264.335136 | 264.3215264 | 264.0854192 | 261.0928824 |
| 264.350232 | 264.3508688 | 264.3560528 | 264.335136 | 264.3235264 | 264.0834192 | 261.0908824 |
| 264.348232 | 264.3498688 | 264.3580528 | 264.335136 | 264.3195264 | 264.0834192 | 261.0908824 |
| 264.349232 | 264.3508688 | 264.3580528 | 264.336136 | 264.3225264 | 264.0824192 | 261.0918824 |
| 264.347232 | 264.3508688 | 264.3570528 | 264.334136 | 264.3225264 | 264.0844192 | 261.0888824 |
| 264.348232 | 264.3508688 | 264.3590528 | 264.335136 | 264.3215264 | 264.0834192 | 261.0908824 |
| 264.348232 | 264.3518688 | 264.3560528 | 264.333136 | 264.3215264 | 264.0854192 | 261.0898824 |
| 264.347232 | 264.3508688 | 264.3550528 | 264.332136 | 264.3205264 | 264.0804192 | 261.0888824 |
| 264.350232 | 264.3518688 | 264.3560528 | 264.333136 | 264.3195264 | 264.0854192 | 261.0908824 |
| 264.349232 | 264.3508688 | 264.3550528 | 264.332136 | 264.3225264 | 264.0824192 | 261.0918824 |
| 264.348232 | 264.3508688 | 264.3560528 | 264.333136 | 264.3235264 | 264.0854192 | 261.0908824 |
| 264.349232 | 264.3518688 | 264.3570528 | 264.336136 | 264.3225264 | 264.0844192 | 261.0928824 |
| 264.350232 | 264.3488688 | 264.3570528 | 264.335136 | 264.3215264 | 264.0834192 | 261.0908824 |
| 264.348232 | 264.3508688 | 264.3540528 | 264.333136 | 264.3205264 | 264.0804192 | 261.0898824 |
| 264.349232 | 264.3518688 | 264.3550528 | 264.335136 | 264.3225264 | 264.0864192 | 261.0908824 |
| 264.346232 | 264.3488688 | 264.3560528 | 264.333136 | 264.3205264 | 264.0814192 | 261.0898824 |
| 264.350232 | 264.3508688 | 264.3580528 | 264.335136 | 264.3225264 | 264.0834192 | 261.0918824 |
| 264.347232 | 264.3488688 | 264.3570528 | 264.332136 | 264.3205264 | 264.0804192 | 261.0888824 |
| 264.348232 | 264.3518688 | 264.3580528 | 264.333136 | 264.3225264 | 264.0854192 | 261.0898824 |

|            |             |             |            |             |             |             |
|------------|-------------|-------------|------------|-------------|-------------|-------------|
| 264.347232 | 264.3508688 | 264.3560528 | 264.332136 | 264.3225264 | 264.0844192 | 261.0888824 |
| 264.349232 | 264.3488688 | 264.3550528 | 264.333136 | 264.3225264 | 264.0854192 | 261.0898824 |
| 264.346232 | 264.3508688 | 264.3560528 | 264.333136 | 264.3215264 | 264.0854192 | 261.0898824 |
| 264.348232 | 264.3518688 | 264.3560528 | 264.334136 | 264.3205264 | 264.0854192 | 261.0908824 |
| 264.348232 | 264.3508688 | 264.3580528 | 264.334136 | 264.3235264 | 264.0884192 | 261.0938824 |
| 264.348232 | 264.3508688 | 264.3560528 | 264.334136 | 264.3225264 | 264.0854192 | 261.0918824 |
| 264.348232 | 264.3498688 | 264.3560528 | 264.332136 | 264.3225264 | 264.0854192 | 261.0908824 |
| 264.348232 | 264.3478688 | 264.3550528 | 264.336136 | 264.3225264 | 264.0874192 | 261.0918824 |
| 264.348232 | 264.3508688 | 264.3560528 | 264.334136 | 264.3225264 | 264.0874192 | 261.0918824 |
| 264.348232 | 264.3498688 | 264.3560528 | 264.335136 | 264.3205264 | 264.0854192 | 261.0908824 |
| 264.348232 | 264.3478688 | 264.3560528 | 264.332136 | 264.3205264 | 264.0834192 | 261.0908824 |
| 264.349232 | 264.3488688 | 264.3550528 | 264.332136 | 264.3215264 | 264.0844192 | 261.0928824 |
| 264.347232 | 264.3488688 | 264.3530528 | 264.332136 | 264.3175264 | 264.0824192 | 261.0888824 |
| 264.348232 | 264.3498688 | 264.3560528 | 264.332136 | 264.3205264 | 264.0834192 | 261.0908824 |
| 264.348232 | 264.3498688 | 264.3550528 | 264.334136 | 264.3225264 | 264.0894192 | 261.0908824 |
| 264.347232 | 264.3498688 | 264.3550528 | 264.332136 | 264.3225264 | 264.0834192 | 261.0888824 |
| 264.347232 | 264.3498688 | 264.3530528 | 264.331136 | 264.3195264 | 264.0844192 | 261.0888824 |
| 264.346232 | 264.3468688 | 264.3540528 | 264.330136 | 264.3195264 | 264.0864192 | 261.0878824 |
| 264.349232 | 264.3508688 | 264.3550528 | 264.333136 | 264.3215264 | 264.0844192 | 261.0898824 |
| 264.347232 | 264.3498688 | 264.3540528 | 264.331136 | 264.3195264 | 264.0824192 | 261.0898824 |
| 264.348232 | 264.3508688 | 264.3540528 | 264.331136 | 264.3195264 | 264.0834192 | 261.0908824 |
| 264.349232 | 264.3498688 | 264.3550528 | 264.331136 | 264.3215264 | 264.0844192 | 261.0898824 |
| 264.348232 | 264.3508688 | 264.3560528 | 264.331136 | 264.3195264 | 264.0814192 | 261.0898824 |
| 264.345232 | 264.3488688 | 264.3510528 | 264.330136 | 264.3205264 | 264.0834192 | 261.0888824 |
| 264.348232 | 264.3508688 | 264.3560528 | 264.332136 | 264.3215264 | 264.0854192 | 261.0898824 |
| 264.346232 | 264.3488688 | 264.3540528 | 264.332136 | 264.3205264 | 264.0854192 | 261.0898824 |
| 264.346232 | 264.3488688 | 264.3540528 | 264.330136 | 264.3205264 | 264.0814192 | 261.0898824 |
| 264.346232 | 264.3488688 | 264.3540528 | 264.332136 | 264.3205264 | 264.0854192 | 261.0898824 |
| 264.346232 | 264.3508688 | 264.3550528 | 264.331136 | 264.3215264 | 264.0844192 | 261.0908824 |
| 264.346232 | 264.3488688 | 264.3540528 | 264.331136 | 264.3195264 | 264.0844192 | 261.0878824 |
| 264.348232 | 264.3508688 | 264.3540528 | 264.330136 | 264.3215264 | 264.0834192 | 261.0898824 |
| 264.348232 | 264.3488688 | 264.3540528 | 264.331136 | 264.3215264 | 264.0814192 | 261.0898824 |
| 264.349232 | 264.3508688 | 264.3570528 | 264.333136 | 264.3215264 | 264.0824192 | 261.0898824 |
| 264.345232 | 264.3488688 | 264.3550528 | 264.334136 | 264.3215264 | 264.0824192 | 261.0898824 |
| 264.347232 | 264.3488688 | 264.3510528 | 264.332136 | 264.3205264 | 264.0844192 | 261.0908824 |
| 264.348232 | 264.3498688 | 264.3540528 | 264.332136 | 264.3205264 | 264.0834192 | 261.0888824 |
| 264.346232 | 264.3498688 | 264.3520528 | 264.332136 | 264.3185264 | 264.0834192 | 261.0888824 |
| 264.344232 | 264.3478688 | 264.3520528 | 264.332136 | 264.3185264 | 264.0834192 | 261.0888824 |
| 264.347232 | 264.3498688 | 264.3520528 | 264.332136 | 264.3215264 | 264.0824192 | 261.0888824 |
| 264.345232 | 264.3498688 | 264.3520528 | 264.332136 | 264.3195264 | 264.0844192 | 261.0878824 |
| 264.348232 | 264.3508688 | 264.3530528 | 264.333136 | 264.3205264 | 264.0824192 | 261.0908824 |
| 264.348232 | 264.3508688 | 264.3540528 | 264.333136 | 264.3205264 | 264.0854192 | 261.0898824 |
| 264.346232 | 264.3488688 | 264.3530528 | 264.331136 | 264.3185264 | 264.0834192 | 261.0898824 |
| 264.347232 | 264.3498688 | 264.3540528 | 264.332136 | 264.3215264 | 264.0864192 | 261.0888824 |
| 264.347232 | 264.3468688 | 264.3520528 | 264.331136 | 264.3185264 | 264.0864192 | 261.0868824 |
| 264.345232 | 264.3498688 | 264.3510528 | 264.332136 | 264.3175264 | 264.0854192 | 261.0888824 |
| 264.346232 | 264.3498688 | 264.3540528 | 264.333136 | 264.3205264 | 264.0884192 | 261.0878824 |

|            |             |             |            |             |             |             |
|------------|-------------|-------------|------------|-------------|-------------|-------------|
| 264.347232 | 264.3498688 | 264.3520528 | 264.333136 | 264.3205264 | 264.0824192 | 261.0868824 |
| 264.349232 | 264.3498688 | 264.3550528 | 264.333136 | 264.3205264 | 264.0864192 | 261.0848824 |
| 264.346232 | 264.3518688 | 264.3530528 | 264.332136 | 264.3195264 | 264.0874192 | 261.0888824 |
| 264.343232 | 264.3478688 | 264.3500528 | 264.330136 | 264.3205264 | 264.0844192 | 261.0878824 |
| 264.344232 | 264.3478688 | 264.3510528 | 264.331136 | 264.3175264 | 264.0874192 | 261.0888824 |
| 264.344232 | 264.3468688 | 264.3520528 | 264.331136 | 264.3205264 | 264.0864192 | 261.0888824 |
| 264.349232 | 264.3488688 | 264.3520528 | 264.332136 | 264.3205264 | 264.0844192 | 261.0868824 |
| 264.345232 | 264.3468688 | 264.3520528 | 264.330136 | 264.3185264 | 264.0844192 | 261.0888824 |
| 264.343232 | 264.3468688 | 264.3520528 | 264.332136 | 264.3185264 | 264.0864192 | 261.0888824 |
| 264.343232 | 264.3468688 | 264.3540528 | 264.330136 | 264.3205264 | 264.0844192 | 261.0898824 |
| NA         | 264.3458688 | 264.3520528 | 264.329136 | 264.3185264 | 264.0824192 | 261.0868824 |
| NA         | 264.3458688 | 264.3520528 | 264.330136 | 264.3175264 | 264.0844192 | 261.0848824 |
| NA         | 264.3468688 | 264.3540528 | 264.330136 | 264.3185264 | 264.0844192 | 261.0848824 |
| NA         | 264.3458688 | 264.3510528 | 264.329136 | 264.3155264 | 264.0814192 | 261.0838824 |
| NA         | NA          | 264.3520528 | 264.330136 | 264.3185264 | 264.0824192 | 261.0868824 |
| NA         | NA          | 264.3530528 | 264.328136 | 264.3165264 | 264.0834192 | 261.0868824 |
| NA         | NA          | 264.3530528 | 264.331136 | 264.3195264 | 264.0864192 | 261.0898824 |
| NA         | 264.3418688 | 264.3540528 | 264.330136 | 264.3185264 | 264.0844192 | 261.0888824 |
| NA         | 264.3468688 | 264.3560528 | 264.330136 | 264.3185264 | 264.0844192 | 261.0888824 |
| NA         | 264.3458688 | 264.3530528 | 264.329136 | 264.3195264 | 264.0814192 | 261.0878824 |
| NA         | 264.3468688 | 264.3530528 | 264.329136 | 264.3175264 | 264.0834192 | 261.0878824 |
| 264.348232 | 264.3468688 | 264.3530528 | 264.329136 | 264.3195264 | 264.0814192 | 261.0878824 |
| 264.349232 | 264.3488688 | 264.3550528 | 264.332136 | 264.3195264 | 264.0794192 | 261.0888824 |
| 264.348232 | 264.3478688 | 264.3520528 | 264.330136 | 264.3185264 | 264.0844192 | 261.0878824 |
| 264.352232 | 264.3488688 | 264.3520528 | 264.333136 | 264.3215264 | 264.0844192 | 261.0908824 |
| 264.349232 | 264.3478688 | 264.3540528 | 264.331136 | 264.3185264 | 264.0844192 | 261.0848824 |
| 264.350232 | 264.3478688 | 264.3510528 | 264.332136 | 264.3175264 | 264.0804192 | 261.0888824 |
| 264.348232 | 264.3468688 | 264.3510528 | 264.331136 | 264.3165264 | 264.0804192 | 261.0888824 |
| 264.348232 | 264.3468688 | 264.3510528 | 264.329136 | 264.3175264 | 264.0804192 | 261.0868824 |
| 264.350232 | 264.3478688 | 264.3530528 | 264.331136 | 264.3175264 | 264.0844192 | 261.0898824 |
| 264.350232 | 264.3498688 | 264.3540528 | 264.331136 | 264.3195264 | 264.0844192 | 261.0908824 |
| 264.346232 | 264.3468688 | 264.3530528 | 264.330136 | 264.3175264 | 264.0814192 | 261.0858824 |
| 264.351232 | 264.3508688 | 264.3540528 | 264.333136 | 264.3205264 | 264.0844192 | 261.0888824 |
| 264.349232 | 264.3488688 | 264.3510528 | 264.331136 | 264.3205264 | 264.0834192 | 261.0878824 |
| 264.349232 | 264.3478688 | 264.3560528 | 264.331136 | 264.3185264 | 264.0834192 | 261.0878824 |
| 264.350232 | 264.3458688 | 264.3510528 | 264.330136 | 264.3195264 | 264.0824192 | 261.0878824 |
| 264.350232 | 264.3488688 | 264.3530528 | 264.330136 | 264.3175264 | 264.0834192 | 261.0878824 |
| 264.348232 | 264.3478688 | 264.3530528 | 264.331136 | 264.3205264 | 264.0854192 | 261.0878824 |
| 264.348232 | 264.3478688 | 264.3520528 | 264.328136 | 264.3195264 | 264.0844192 | 261.0878824 |
| 264.348232 | 264.3478688 | 264.3500528 | 264.330136 | 264.3195264 | 264.0844192 | 261.0878824 |
| 264.347232 | 264.3468688 | 264.3500528 | 264.329136 | 264.3165264 | 264.0834192 | 261.0898824 |
| 264.346232 | 264.3468688 | 264.3510528 | 264.327136 | 264.3185264 | 264.0814192 | 261.0868824 |
| 264.346232 | 264.3468688 | 264.3510528 | 264.329136 | 264.3175264 | 264.0804192 | 261.0868824 |
| 264.350232 | 264.3488688 | 264.3530528 | 264.331136 | 264.3185264 | 264.0814192 | 261.0868824 |
| 264.346232 | 264.3468688 | 264.3510528 | 264.329136 | 264.3175264 | 264.0804192 | 261.0858824 |
| 264.348232 | 264.3488688 | 264.3530528 | 264.331136 | 264.3205264 | 264.0844192 | 261.0878824 |
| 264.347232 | 264.3458688 | 264.3520528 | 264.330136 | 264.3175264 | 264.0814192 | 261.0858824 |

|            |             |             |            |             |             |             |
|------------|-------------|-------------|------------|-------------|-------------|-------------|
| 264.349232 | 264.3488688 | 264.3530528 | 264.330136 | 264.3195264 | 264.0824192 | 261.0878824 |
| 264.347232 | 264.3468688 | 264.3520528 | 264.331136 | 264.3175264 | 264.0834192 | 261.0858824 |
| 264.347232 | 264.3468688 | 264.3520528 | 264.330136 | 264.3175264 | 264.0844192 | 261.0878824 |
| 264.349232 | 264.3468688 | 264.3520528 | 264.330136 | 264.3175264 | 264.0844192 | 261.0898824 |
| 264.349232 | 264.3488688 | 264.3540528 | 264.331136 | 264.3175264 | 264.0834192 | 261.0878824 |
| 264.349232 | 264.3478688 | 264.3520528 | 264.330136 | 264.3185264 | 264.0834192 | 261.0878824 |
| 264.349232 | 264.3488688 | 264.3520528 | 264.333136 | 264.3195264 | 264.0844192 | 261.0898824 |
| 264.348232 | 264.3478688 | 264.3530528 | 264.330136 | 264.3185264 | 264.0834192 | 261.0888824 |
| 264.350232 | 264.3478688 | 264.3530528 | 264.330136 | 264.3205264 | 264.0864192 | 261.0868824 |
| 264.346232 | 264.3468688 | 264.3500528 | 264.329136 | 264.3175264 | 264.0834192 | 261.0878824 |
| 264.350232 | 264.3498688 | 264.3530528 | 264.332136 | 264.3205264 | 264.0844192 | 261.0868824 |
| 264.348232 | 264.3478688 | 264.3530528 | 264.332136 | 264.3185264 | 264.0864192 | 261.0868824 |
| 264.350232 | 264.3478688 | 264.3530528 | 264.330136 | 264.3185264 | 264.0844192 | 261.0888824 |
| 264.349232 | 264.3478688 | 264.3520528 | 264.332136 | 264.3195264 | 264.0854192 | 261.0888824 |
| 264.350232 | 264.3468688 | 264.3520528 | 264.331136 | 264.3165264 | 264.0834192 | 261.0878824 |
| 264.348232 | 264.3468688 | 264.3510528 | 264.329136 | 264.3175264 | 264.0814192 | 261.0858824 |
| 264.348232 | 264.3478688 | 264.3530528 | 264.330136 | 264.3185264 | 264.0854192 | 261.0878824 |
| 264.348232 | 264.3468688 | 264.3530528 | 264.329136 | 264.3195264 | 264.0834192 | 261.0878824 |
| 264.347232 | 264.3458688 | 264.3520528 | 264.330136 | 264.3205264 | 264.0834192 | 261.0868824 |
| 264.349232 | 264.3468688 | 264.3530528 | 264.331136 | 264.3185264 | 264.0844192 | 261.0868824 |
| 264.349232 | 264.3488688 | 264.3540528 | 264.332136 | 264.3185264 | 264.0834192 | 261.0868824 |
| 264.348232 | 264.3468688 | 264.3500528 | 264.330136 | 264.3175264 | 264.0814192 | 261.0838824 |
| 264.347232 | 264.3488688 | 264.3540528 | 264.331136 | 264.3185264 | 264.0844192 | 261.0878824 |
| 264.351232 | 264.3458688 | 264.3510528 | 264.330136 | 264.3185264 | 264.0844192 | 261.0848824 |
| 264.349232 | 264.3488688 | 264.3520528 | 264.331136 | 264.3185264 | 264.0834192 | 261.0868824 |
| 264.349232 | 264.3468688 | 264.3520528 | 264.330136 | 264.3175264 | 264.0834192 | 261.0868824 |
| 264.347232 | 264.3468688 | 264.3530528 | 264.330136 | 264.3185264 | 264.0834192 | 261.0868824 |
| 264.349232 | 264.3468688 | 264.3540528 | 264.330136 | 264.3185264 | 264.0844192 | 261.0868824 |
| 264.348232 | 264.3468688 | 264.3520528 | 264.330136 | 264.3175264 | 264.0854192 | 261.0838824 |
| 264.349232 | 264.3468688 | 264.3520528 | 264.332136 | 264.3175264 | 264.0814192 | 261.0868824 |
| 264.348232 | 264.3468688 | 264.3520528 | 264.330136 | 264.3175264 | 264.0834192 | 261.0848824 |
| 264.350232 | 264.3468688 | 264.3520528 | 264.332136 | 264.3175264 | 264.0854192 | 261.0858824 |
| 264.350232 | 264.3458688 | 264.3530528 | 264.330136 | 264.3175264 | 264.0824192 | 261.0858824 |
| 264.349232 | 264.3478688 | 264.3530528 | 264.329136 | 264.3165264 | 264.0844192 | 261.0858824 |
| 264.348232 | 264.3448688 | 264.3520528 | 264.328136 | 264.3175264 | 264.0814192 | 261.0848824 |
| 264.347232 | 264.3448688 | 264.3510528 | 264.328136 | 264.3155264 | 264.0804192 | 261.0868824 |
| 264.345232 | 264.3438688 | 264.3490528 | 264.328136 | 264.3165264 | 264.0794192 | 261.0838824 |
| 264.349232 | 264.3468688 | 264.3510528 | 264.327136 | 264.3165264 | 264.0824192 | 261.0848824 |
| 264.349232 | 264.3468688 | 264.3510528 | 264.328136 | 264.3175264 | 264.0824192 | 261.0848824 |
| 264.347232 | 264.3458688 | 264.3510528 | 264.328136 | 264.3185264 | 264.0814192 | 261.0868824 |
| 264.351232 | 264.3468688 | 264.3530528 | 264.332136 | 264.3195264 | 264.0844192 | 261.0868824 |
| 264.349232 | 264.3468688 | 264.3510528 | 264.330136 | 264.3165264 | 264.0834192 | 261.0868824 |
| 264.347232 | 264.3458688 | 264.3510528 | 264.330136 | 264.3185264 | 264.0834192 | 261.0858824 |
| 264.349232 | 264.3468688 | 264.3490528 | 264.330136 | 264.3195264 | 264.0814192 | 261.0868824 |
| 264.350232 | 264.3468688 | 264.3520528 | 264.329136 | 264.3185264 | 264.0834192 | 261.0878824 |
| 264.350232 | 264.3458688 | 264.3520528 | 264.331136 | 264.3185264 | 264.0834192 | 261.0878824 |
| 264.348232 | 264.3468688 | 264.3540528 | 264.329136 | 264.3185264 | 264.0834192 | 261.0878824 |



|            |             |             |            |             |             |             |
|------------|-------------|-------------|------------|-------------|-------------|-------------|
| 264.348232 | 264.3438688 | 264.3510528 | 264.329136 | 264.3175264 | 264.0844192 | 261.0848824 |
| 264.348232 | 264.3448688 | 264.3510528 | 264.326136 | 264.3185264 | 264.0814192 | 261.0868824 |
| 264.349232 | 264.3448688 | 264.3530528 | 264.329136 | 264.3175264 | 264.0824192 | 261.0878824 |
| 264.346232 | 264.3448688 | 264.3520528 | 264.327136 | 264.3165264 | 264.0814192 | 261.0848824 |
| 264.348232 | 264.3448688 | 264.3500528 | 264.328136 | 264.3165264 | 264.0804192 | 261.0848824 |
| 264.348232 | 264.3448688 | 264.3530528 | 264.330136 | 264.3185264 | 264.0854192 | 261.0848824 |
| 264.346232 | 264.3448688 | 264.3520528 | 264.327136 | 264.3165264 | 264.0814192 | 261.0838824 |
| 264.346232 | 264.3448688 | 264.3520528 | 264.328136 | 264.3185264 | 264.0854192 | 261.0868824 |
| 264.348232 | 264.3468688 | 264.3520528 | 264.330136 | 264.3185264 | 264.0834192 | 261.0888824 |
| 264.347232 | 264.3448688 | 264.3510528 | 264.329136 | 264.3175264 | 264.0804192 | 261.0838824 |
| 264.347232 | 264.3448688 | 264.3500528 | 264.328136 | 264.3155264 | 264.0824192 | 261.0838824 |
| 264.346232 | 264.3438688 | 264.3500528 | 264.328136 | 264.3145264 | 264.0794192 | 261.0848824 |
| 264.349232 | 264.3468688 | 264.3530528 | 264.329136 | 264.3195264 | 264.0834192 | 261.0858824 |
| 264.343232 | 264.3428688 | 264.3500528 | 264.328136 | 264.3155264 | 264.0804192 | 261.0818824 |
| 264.345232 | 264.3428688 | 264.3530528 | 264.328136 | 264.3155264 | 264.0814192 | 261.0838824 |
| 264.345232 | 264.3418688 | 264.3500528 | 264.327136 | 264.3145264 | 264.0794192 | 261.0828824 |
| 264.346232 | 264.3438688 | 264.3510528 | 264.328136 | 264.3155264 | 264.0834192 | 261.0848824 |
| 264.345232 | 264.3448688 | 264.3500528 | 264.329136 | 264.3165264 | 264.0814192 | 261.0858824 |
| 264.345232 | 264.3438688 | 264.3480528 | 264.328136 | 264.3155264 | 264.0804192 | 261.0858824 |
| 264.346232 | 264.3458688 | 264.3490528 | 264.327136 | 264.3165264 | 264.0794192 | 261.0848824 |
| 264.347232 | 264.3448688 | 264.3500528 | 264.331136 | 264.3155264 | 264.0784192 | 261.0858824 |
| 264.345232 | 264.3428688 | 264.3500528 | 264.327136 | 264.2975264 | 264.0804192 | 261.0858824 |
| 264.346232 | 264.3428688 | 264.3490528 | 264.325136 | 264.3145264 | 264.0784192 | 261.0838824 |
| 264.345232 | 264.3428688 | 264.3480528 | NA         | 264.3155264 | 264.0804192 | 261.0828824 |
| 264.347232 | 264.3438688 | 264.3600528 | 264.327136 | 264.3155264 | 264.0804192 | 261.0858824 |
| 264.345232 | 264.3448688 | NA          | 264.326136 | 264.3155264 | 264.0784192 | 261.0858824 |
| 264.348232 | 264.3458688 | NA          | 264.330136 | 264.3165264 | 264.0834192 | 261.0868824 |
| 264.346232 | 264.3458688 | NA          | 264.330136 | 264.3165264 | 264.0804192 | NA          |
| 264.344232 | 264.3438688 | NA          | 264.328136 | 264.3165264 | 264.0794192 | NA          |
| 264.345232 | 264.3438688 | NA          | 264.329136 | 264.3175264 | 264.0784192 | NA          |
| 264.346232 | 264.3448688 | NA          | 264.328136 | 264.3175264 | 264.0774192 | NA          |
| 264.346232 | 264.3448688 | NA          | 264.329136 | 264.3175264 | 264.0814192 | 261.0848824 |
| 264.348232 | 264.3448688 | 264.3510528 | 264.330136 | 264.3185264 | 264.0804192 | 261.0868824 |
| 264.347232 | 264.3438688 | 264.3500528 | 264.328136 | 264.3185264 | 264.0824192 | 261.0868824 |
| 264.345232 | 264.3448688 | 264.3500528 | 264.328136 | 264.3165264 | 264.0824192 | 261.0828824 |
| 264.347232 | 264.3448688 | 264.3480528 | 264.328136 | 264.3165264 | 264.0794192 | 261.0848824 |
| 264.343232 | 264.3428688 | 264.3480528 | 264.326136 | 264.3145264 | 264.0794192 | 261.0828824 |
| 264.344232 | 264.3428688 | 264.3490528 | 264.326136 | 264.3155264 | 264.0814192 | 261.0848824 |
| 264.346232 | 264.3448688 | 264.3490528 | 264.330136 | 264.3165264 | 264.0814192 | 261.0848824 |
| 264.346232 | 264.3448688 | 264.3510528 | 264.328136 | 264.3155264 | 264.0814192 | 261.0868824 |
| 264.343232 | 264.3418688 | 264.3480528 | 264.325136 | 264.3125264 | 264.0784192 | 261.0838824 |
| 264.344232 | 264.3428688 | 264.3490528 | 264.330136 | 264.3155264 | 264.0804192 | 261.0848824 |
| 264.343232 | 264.3418688 | 264.3480528 | 264.327136 | 264.3125264 | 264.0784192 | 261.0838824 |
| 264.345232 | 264.3418688 | 264.3480528 | 264.325136 | 264.3145264 | 264.0774192 | 261.0838824 |
| 264.343232 | 264.3418688 | 264.3490528 | 264.327136 | 264.3145264 | 264.0754192 | 261.0818824 |
| 264.344232 | 264.3428688 | 264.3470528 | 264.327136 | 264.3135264 | 264.0804192 | 261.0838824 |
| 264.342232 | 264.3408688 | 264.3480528 | 264.325136 | 264.3125264 | NA          | 261.0808824 |

|            |             |             |            |             |             |             |
|------------|-------------|-------------|------------|-------------|-------------|-------------|
| 264.343232 | 264.3418688 | 264.3490528 | 264.325136 | 264.3145264 | NA          | 261.0848824 |
| 264.345232 | 264.3438688 | 264.3490528 | 264.327136 | 264.3155264 | 264.0764192 | 261.0848824 |
| 264.341232 | 264.3418688 | 264.3480528 | 264.325136 | 264.3145264 | 264.0784192 | 261.0848824 |
| 264.343232 | 264.3408688 | 264.3490528 | 264.327136 | 264.3145264 | 264.0784192 | 261.0818824 |
| 264.344232 | 264.3418688 | 264.3490528 | 264.327136 | 264.3135264 | 264.0784192 | 261.0838824 |
| 264.343232 | 264.3418688 | 264.3490528 | 264.325136 | 264.3145264 | 264.0824192 | 261.0798824 |
| 264.344232 | 264.3418688 | 264.3470528 | 264.325136 | 264.3135264 | 264.0784192 | 261.0838824 |
| 264.344232 | 264.3428688 | 264.3490528 | 264.327136 | 264.3155264 | 264.0804192 | 261.0818824 |
| 264.345232 | 264.3418688 | 264.3490528 | 264.327136 | 264.3145264 | 264.0824192 | 261.0848824 |
| 264.345232 | 264.3438688 | 264.3490528 | 264.328136 | 264.3155264 | 264.0784192 | 261.0868824 |
| 264.345232 | 264.3438688 | 264.3490528 | 264.328136 | 264.3155264 | 264.0804192 | 261.0848824 |
| 264.344232 | 264.3428688 | 264.3500528 | 264.327136 | 264.3145264 | 264.0794192 | 261.0858824 |
| 264.346232 | 264.3438688 | 264.3490528 | 264.329136 | 264.3165264 | 264.0784192 | 261.0858824 |
| 264.345232 | 264.3448688 | 264.3490528 | 264.328136 | 264.3135264 | 264.0784192 | 261.0858824 |
| 264.345232 | 264.3428688 | 264.3470528 | 264.328136 | 264.3155264 | 264.0804192 | 261.0878824 |
| 264.343232 | 264.3428688 | 264.3480528 | 264.326136 | 264.3145264 | 264.0774192 | 261.0848824 |
| 264.345232 | 264.3408688 | 264.3500528 | 264.326136 | 264.3125264 | 264.0784192 | 261.0848824 |
| 264.346232 | 264.3428688 | 264.3500528 | 264.328136 | 264.3165264 | 264.0774192 | 261.0868824 |
| 264.346232 | 264.3448688 | 264.3520528 | 264.328136 | 264.3175264 | 264.0814192 | 261.0878824 |
| 264.346232 | 264.3448688 | 264.3500528 | 264.327136 | 264.3185264 | 264.0814192 | 261.0868824 |
| 264.344232 | 264.3418688 | 264.3480528 | 264.326136 | 264.3135264 | 264.0794192 | 261.0858824 |
| 264.347232 | 264.3448688 | 264.3510528 | 264.329136 | 264.3155264 | 264.0804192 | 261.0878824 |
| 264.344232 | 264.3428688 | 264.3480528 | 264.326136 | 264.3165264 | 264.0774192 | 261.0828824 |
| 264.343232 | 264.3428688 | 264.3490528 | 264.327136 | 264.3145264 | 264.0774192 | 261.0848824 |
| 264.346232 | 264.3458688 | 264.3500528 | 264.327136 | 264.3165264 | 264.0804192 | 261.0878824 |
| 264.345232 | 264.3448688 | 264.3490528 | 264.328136 | 264.3145264 | 264.0804192 | 261.0868824 |
| 264.346232 | 264.3428688 | 264.3500528 | 264.326136 | 264.3135264 | 264.0764192 | 261.0838824 |
| 264.346232 | 264.3428688 | 264.3500528 | 264.327136 | 264.3155264 | 264.0764192 | 261.0858824 |
| 264.343232 | 264.3418688 | 264.3470528 | 264.326136 | 264.3135264 | 264.0794192 | 261.0828824 |
| 264.344232 | 264.3418688 | 264.3490528 | 264.326136 | 264.3125264 | 264.0804192 | 261.0848824 |
| 264.343232 | 264.3418688 | 264.3480528 | 264.326136 | 264.3135264 | 264.0774192 | 261.0818824 |
| 264.344232 | 264.3428688 | 264.3460528 | 264.328136 | 264.3155264 | 264.0784192 | 261.0838824 |
| 264.346232 | 264.3438688 | 264.3500528 | 264.330136 | 264.3175264 | 264.0834192 | 261.0848824 |
| 264.345232 | 264.3428688 | 264.3490528 | 264.329136 | 264.3145264 | 264.0784192 | 261.0838824 |
| 264.342232 | 264.3418688 | 264.3460528 | 264.326136 | 264.3135264 | 264.0794192 | 261.0828824 |
| 264.344232 | 264.3448688 | 264.3500528 | 264.328136 | 264.3135264 | 264.0794192 | 261.0858824 |
| 264.347232 | 264.3428688 | 264.3490528 | 264.329136 | 264.3165264 | 264.0814192 | 261.0858824 |
| 264.344232 | 264.3418688 | 264.3500528 | 264.328136 | 264.3155264 | 264.0784192 | 261.0848824 |
| 264.346232 | 264.3448688 | 264.3480528 | 264.328136 | 264.3155264 | 264.0834192 | 261.0848824 |
| 264.343232 | 264.3418688 | 264.3470528 | 264.327136 | 264.3145264 | 264.0794192 | 261.0838824 |
| 264.345232 | 264.3438688 | 264.3490528 | 264.328136 | 264.3165264 | 264.0804192 | 261.0848824 |
| 264.345232 | 264.3438688 | 264.3490528 | 264.328136 | 264.3145264 | 264.0804192 | 261.0848824 |
| 264.343232 | 264.3418688 | 264.3470528 | 264.325136 | 264.3125264 | 264.0794192 | 261.0838824 |
| 264.344232 | 264.3438688 | 264.3480528 | 264.325136 | 264.3145264 | 264.0814192 | 261.0858824 |
| 264.343232 | 264.3428688 | 264.3470528 | 264.324136 | 264.3135264 | 264.0784192 | 261.0808824 |
| 264.344232 | 264.3428688 | 264.3480528 | 264.327136 | 264.3135264 | 264.0804192 | 261.0828824 |
| 264.345232 | 264.3438688 | 264.3490528 | 264.325136 | 264.3155264 | 264.0804192 | 261.0858824 |

|            |             |             |            |             |             |             |
|------------|-------------|-------------|------------|-------------|-------------|-------------|
| 264.344232 | 264.3418688 | 264.3440528 | 264.326136 | 264.3145264 | 264.0794192 | 261.0828824 |
| 264.342232 | 264.3428688 | 264.3440528 | 264.324136 | 264.3125264 | 264.0784192 | 261.0828824 |
| 264.345232 | 264.3438688 | 264.3490528 | 264.327136 | 264.3155264 | 264.0774192 | 261.0838824 |
| 264.340232 | 264.3428688 | 264.3460528 | 264.325136 | 264.3105264 | 264.0764192 | 261.0838824 |
| 264.344232 | 264.3418688 | 264.3470528 | 264.327136 | 264.3135264 | 264.0774192 | 261.0838824 |
| 264.344232 | 264.3438688 | 264.3470528 | 264.327136 | 264.3135264 | 264.0794192 | 261.0838824 |
| 264.343232 | 264.3428688 | 264.3440528 | 264.326136 | 264.3125264 | 264.0804192 | 261.0828824 |
| 264.344232 | 264.3438688 | 264.3480528 | 264.327136 | 264.3145264 | 264.0794192 | 261.0828824 |
| 264.343232 | 264.3428688 | 264.3480528 | 264.327136 | 264.3145264 | 264.0784192 | 261.0828824 |
| 264.344232 | 264.3458688 | 264.3500528 | 264.329136 | 264.3165264 | 264.0804192 | 261.0838824 |
| 264.343232 | 264.3428688 | 264.3490528 | 264.328136 | 264.3135264 | 264.0814192 | 261.0828824 |
| 264.343232 | 264.3418688 | 264.3480528 | 264.327136 | 264.3145264 | 264.0764192 | 261.0818824 |
| 264.344232 | 264.3438688 | 264.3480528 | 264.327136 | 264.3135264 | 264.0804192 | 261.0818824 |
| 264.343232 | 264.3438688 | 264.3450528 | 264.325136 | 264.3145264 | 264.0784192 | 261.0818824 |
| 264.343232 | 264.3438688 | 264.3480528 | 264.327136 | 264.3145264 | 264.0784192 | 261.0858824 |
| 264.343232 | 264.3438688 | 264.3460528 | 264.327136 | 264.3145264 | 264.0784192 | 261.0818824 |
| 264.346232 | 264.3428688 | 264.3450528 | 264.326136 | 264.3135264 | 264.0794192 | 261.0828824 |
| 264.344232 | 264.3438688 | 264.3480528 | 264.328136 | 264.3155264 | 264.0834192 | 261.0828824 |
| 264.343232 | 264.3418688 | 264.3470528 | 264.328136 | 264.3125264 | 264.0794192 | 261.0798824 |
| 264.345232 | 264.3428688 | 264.3470528 | 264.328136 | 264.3145264 | 264.0804192 | 261.0848824 |
| 264.344232 | 264.3448688 | 264.3490528 | 264.328136 | 264.3165264 | 264.0834192 | 261.0838824 |
| 264.341232 | 264.3438688 | 264.3460528 | 264.327136 | 264.3125264 | 264.0784192 | 261.0828824 |
| 264.345232 | 264.3418688 | 264.3480528 | 264.327136 | 264.3155264 | 264.0804192 | 261.0848824 |
| 264.343232 | 264.3418688 | 264.3480528 | 264.328136 | 264.3155264 | 264.0814192 | 261.0848824 |
| 264.347232 | 264.3458688 | 264.3480528 | 264.329136 | 264.3175264 | 264.0824192 | 261.0848824 |
| 264.345232 | 264.3428688 | 264.3480528 | 264.327136 | 264.3155264 | 264.0804192 | 261.0838824 |
| 264.345232 | 264.3448688 | 264.3480528 | 264.328136 | 264.3155264 | 264.0804192 | 261.0838824 |
| 264.346232 | 264.3458688 | 264.3490528 | 264.328136 | 264.3165264 | 264.0814192 | 261.0848824 |
| 264.344232 | 264.3438688 | 264.3470528 | 264.328136 | 264.3145264 | 264.0804192 | 261.0868824 |
| 264.344232 | 264.3428688 | 264.3490528 | 264.328136 | 264.3165264 | 264.0814192 | 261.0868824 |
| 264.347232 | 264.3458688 | 264.3500528 | 264.330136 | 264.3165264 | 264.0844192 | 261.0868824 |
| 264.344232 | 264.3438688 | 264.3470528 | 264.327136 | 264.3145264 | 264.0794192 | 261.0878824 |
| 264.344232 | 264.3438688 | 264.3470528 | 264.327136 | 264.3165264 | 264.0814192 | 261.0858824 |
| 264.345232 | 264.3428688 | 264.3480528 | 264.325136 | 264.3155264 | 264.0824192 | 261.0868824 |
| 264.345232 | 264.3448688 | 264.3480528 | 264.327136 | 264.3175264 | 264.0814192 | 261.0858824 |
| 264.346232 | 264.3438688 | 264.3470528 | 264.326136 | 264.3145264 | 264.0824192 | 261.0858824 |
| 264.343232 | 264.3418688 | 264.3460528 | 264.326136 | 264.3135264 | 264.0784192 | 261.0848824 |
| 264.344232 | 264.3438688 | 264.3460528 | 264.325136 | 264.3155264 | 264.0794192 | 261.0848824 |
| 264.345232 | 264.3458688 | 264.3480528 | 264.328136 | 264.3165264 | 264.0794192 | 261.0868824 |
| 264.344232 | 264.3438688 | 264.3470528 | 264.327136 | 264.3155264 | 264.0804192 | 261.0858824 |
| 264.346232 | 264.3458688 | 264.3490528 | 264.328136 | 264.3175264 | 264.0814192 | 261.0888824 |
| 264.346232 | 264.3438688 | 264.3470528 | 264.327136 | 264.3135264 | 264.0794192 | 261.0888824 |
| 264.345232 | 264.3448688 | 264.3460528 | 264.326136 | 264.3135264 | 264.0794192 | 261.0838824 |
| 264.346232 | 264.3448688 | 264.3480528 | 264.326136 | 264.3145264 | 264.0794192 | 261.0858824 |
| 264.346232 | 264.3428688 | 264.3480528 | 264.326136 | 264.3145264 | 264.0834192 | 261.0858824 |
| 264.347232 | 264.3458688 | 264.3480528 | 264.327136 | 264.3145264 | 264.0804192 | 261.0858824 |
| 264.347232 | 264.3478688 | 264.3490528 | 264.329136 | 264.3175264 | 264.0844192 | 261.0888824 |

|            |             |             |            |             |             |             |
|------------|-------------|-------------|------------|-------------|-------------|-------------|
| 264.346232 | 264.3418688 | 264.3450528 | 264.323136 | 264.3135264 | 264.0794192 | 261.0848824 |
| 264.344232 | 264.3438688 | 264.3470528 | 264.326136 | 264.3135264 | 264.0794192 | 261.0858824 |
| 264.344232 | 264.3438688 | 264.3470528 | 264.326136 | 264.3135264 | 264.0794192 | 261.0848824 |
| 264.343232 | 264.3418688 | 264.3460528 | 264.327136 | 264.3145264 | 264.0784192 | 261.0848824 |
| 264.345232 | 264.3438688 | 264.3460528 | 264.325136 | 264.3145264 | 264.0804192 | 261.0868824 |
| 264.342232 | 264.3428688 | 264.3470528 | 264.324136 | 264.3135264 | 264.0804192 | 261.0858824 |
| 264.344232 | 264.3438688 | 264.3470528 | 264.326136 | 264.3135264 | 264.0804192 | 261.0858824 |
| 264.345232 | 264.3448688 | 264.3490528 | 264.328136 | 264.3155264 | 264.0794192 | 261.0878824 |
| 264.344232 | 264.3438688 | 264.3470528 | 264.325136 | 264.3145264 | 264.0784192 | 261.0848824 |
| 264.343232 | 264.3418688 | 264.3440528 | 264.324136 | 264.3135264 | 264.0784192 | 261.0838824 |
| 264.342232 | 264.3418688 | 264.3450528 | 264.325136 | 264.3145264 | 264.0784192 | 261.0848824 |
| 264.347232 | 264.3448688 | 264.3480528 | 264.328136 | 264.3175264 | 264.0824192 | 261.0858824 |
| 264.344232 | 264.3438688 | 264.3470528 | 264.325136 | 264.3145264 | 264.0784192 | 261.0848824 |
| 264.345232 | 264.3448688 | 264.3510528 | 264.325136 | 264.3155264 | 264.0784192 | 261.0858824 |
| 264.342232 | 264.3428688 | 264.3460528 | 264.324136 | 264.3105264 | 264.0794192 | 261.0848824 |
| 264.344232 | 264.3408688 | 264.3460528 | 264.326136 | 264.3125264 | 264.0774192 | 261.0848824 |
| 264.344232 | 264.3428688 | 264.3460528 | 264.326136 | 264.3135264 | 264.0814192 | 261.0858824 |
| 264.342232 | 264.3408688 | 264.3440528 | 264.324136 | 264.3105264 | 264.0764192 | 261.0848824 |
| 264.343232 | 264.3428688 | 264.3470528 | 264.325136 | 264.3135264 | 264.0764192 | 261.0848824 |
| 264.343232 | 264.3428688 | 264.3450528 | 264.325136 | 264.3135264 | 264.0784192 | 261.0848824 |
| 264.343232 | 264.3428688 | 264.3460528 | 264.325136 | 264.3155264 | 264.0774192 | 261.0848824 |
| 264.344232 | 264.3428688 | 264.3480528 | 264.325136 | 264.3135264 | 264.0774192 | 261.0838824 |
| 264.345232 | 264.3448688 | 264.3490528 | 264.325136 | 264.3155264 | 264.0794192 | 261.0848824 |
| 264.345232 | 264.3448688 | 264.3490528 | 264.328136 | 264.3145264 | 264.0784192 | 261.0848824 |
| 264.343232 | 264.3428688 | 264.3470528 | 264.325136 | 264.3145264 | 264.0804192 | 261.0848824 |
| 264.343232 | 264.3438688 | 264.3470528 | 264.326136 | 264.3145264 | 264.0804192 | 261.0848824 |
| 264.343232 | 264.3448688 | 264.3490528 | 264.326136 | 264.3145264 | 264.0824192 | 261.0848824 |
| 264.343232 | 264.3428688 | 264.3490528 | 264.326136 | 264.3135264 | 264.0784192 | 261.0848824 |
| 264.343232 | 264.3438688 | 264.3490528 | 264.326136 | 264.3145264 | 264.0804192 | 261.0878824 |
| 264.344232 | 264.3428688 | 264.3470528 | 264.326136 | 264.3145264 | 264.0784192 | 261.0848824 |
| 264.345232 | 264.3428688 | 264.3490528 | 264.326136 | 264.3145264 | 264.0784192 | 261.0868824 |
| 264.342232 | 264.3428688 | 264.3480528 | 264.323136 | 264.3115264 | 264.0754192 | 261.0848824 |
| 264.343232 | 264.3408688 | 264.3470528 | 264.323136 | 264.3115264 | 264.0754192 | 261.0838824 |
| 264.343232 | 264.3428688 | 264.3470528 | 264.325136 | 264.3135264 | 264.0784192 | 261.0848824 |
| 264.340232 | 264.3408688 | 264.3460528 | 264.323136 | 264.3095264 | 264.0744192 | 261.0848824 |
| 264.343232 | 264.3428688 | 264.3490528 | 264.323136 | 264.3125264 | 264.0804192 | 261.0848824 |
| 264.344232 | 264.3428688 | 264.3460528 | 264.324136 | 264.3125264 | 264.0774192 | 261.0858824 |
| 264.341232 | 264.3418688 | 264.3430528 | 264.323136 | 264.3105264 | 264.0754192 | 261.0828824 |
| 264.342232 | 264.3418688 | 264.3440528 | 264.325136 | 264.3125264 | 264.0794192 | 261.0848824 |
| 264.343232 | 264.3408688 | 264.3460528 | 264.324136 | 264.3135264 | 264.0784192 | 261.0858824 |
| 264.341232 | 264.3408688 | 264.3460528 | 264.324136 | 264.3095264 | 264.0764192 | 261.0858824 |
| 264.342232 | 264.3418688 | 264.3480528 | 264.327136 | 264.3145264 | 264.0794192 | 261.0848824 |
| 264.345232 | 264.3448688 | 264.3470528 | 264.326136 | 264.3135264 | 264.0804192 | 261.0848824 |
| 264.343232 | 264.3418688 | 264.3470528 | 264.324136 | 264.3125264 | 264.0804192 | 261.0828824 |
| 264.344232 | 264.3428688 | 264.3480528 | 264.326136 | 264.3125264 | 264.0794192 | 261.0838824 |
| 264.344232 | 264.3428688 | 264.3460528 | 264.326136 | 264.3115264 | 264.0784192 | 261.0838824 |
| 264.344232 | 264.3428688 | 264.3480528 | 264.326136 | 264.3145264 | 264.0814192 | 261.0858824 |

|            |             |             |            |             |             |             |
|------------|-------------|-------------|------------|-------------|-------------|-------------|
| 264.343232 | 264.3428688 | 264.3480528 | 264.326136 | 264.3115264 | 264.0824192 | 261.0858824 |
| 264.343232 | 264.3428688 | 264.3480528 | 264.326136 | 264.3135264 | 264.0804192 | 261.0848824 |
| 264.341232 | 264.3418688 | 264.3450528 | 264.324136 | 264.3125264 | 264.0784192 | 261.0828824 |
| 264.343232 | 264.3418688 | 264.3480528 | 264.326136 | 264.3135264 | 264.0804192 | 261.0858824 |
| 264.340232 | 264.3408688 | 264.3450528 | 264.325136 | 264.3125264 | 264.0774192 | 261.0848824 |
| 264.343232 | 264.3438688 | 264.3470528 | 264.326136 | 264.3135264 | 264.0804192 | 261.0858824 |
| 264.341232 | 264.3418688 | 264.3470528 | 264.326136 | 264.3135264 | 264.0804192 | 261.0848824 |
| 264.343232 | 264.3398688 | 264.3470528 | 264.324136 | 264.3135264 | 264.0774192 | 261.0848824 |
| 264.340232 | 264.3408688 | 264.3460528 | 264.325136 | 264.3095264 | 264.0774192 | 261.0818824 |
| 264.341232 | 264.3438688 | 264.3450528 | 264.326136 | 264.3125264 | 264.0774192 | 261.0848824 |
| 264.341232 | 264.3418688 | 264.3460528 | 264.326136 | 264.3135264 | 264.0784192 | 261.0858824 |
| 264.342232 | 264.3428688 | 264.3480528 | 264.327136 | 264.3135264 | 264.0794192 | 261.0858824 |
| 264.342232 | 264.3428688 | 264.3460528 | 264.324136 | 264.3125264 | 264.0774192 | 261.0838824 |
| 264.343232 | 264.3428688 | 264.3470528 | 264.325136 | 264.3125264 | 264.0804192 | 261.0858824 |
| 264.343232 | 264.3438688 | 264.3470528 | 264.327136 | 264.3135264 | 264.0824192 | 261.0848824 |
| 264.343232 | 264.3428688 | 264.3470528 | 264.323136 | 264.3125264 | 264.0804192 | 261.0838824 |
| 264.343232 | 264.3438688 | 264.3460528 | 264.325136 | 264.3135264 | 264.0814192 | 261.0838824 |
| 264.343232 | 264.3428688 | 264.3460528 | 264.326136 | 264.3125264 | 264.0784192 | 261.0838824 |
| 264.341232 | 264.3408688 | 264.3430528 | 264.323136 | 264.3105264 | 264.0784192 | 261.0818824 |
| 264.341232 | 264.3428688 | 264.3450528 | 264.323136 | 264.3125264 | 264.0804192 | 261.0838824 |
| 264.341232 | 264.3408688 | 264.3450528 | 264.323136 | 264.3105264 | 264.0784192 | 261.0818824 |
| 264.341232 | 264.3418688 | 264.3490528 | 264.326136 | 264.3125264 | 264.0784192 | 261.0858824 |
| 264.341232 | 264.3418688 | 264.3460528 | 264.324136 | 264.3115264 | 264.0774192 | 261.0828824 |
| 264.343232 | 264.3448688 | 264.3470528 | 264.324136 | 264.3125264 | 264.0784192 | 261.0858824 |
| 264.341232 | 264.3448688 | 264.3450528 | 264.324136 | 264.3125264 | 264.0804192 | 261.0848824 |
| 264.341232 | 264.3438688 | 264.3450528 | 264.325136 | 264.3115264 | 264.0804192 | 261.0828824 |
| 264.342232 | 264.3428688 | 264.3450528 | 264.325136 | 264.3125264 | 264.0824192 | 261.0838824 |
| 264.343232 | 264.3418688 | 264.3450528 | 264.325136 | 264.3115264 | 264.0784192 | 261.0848824 |
| 264.342232 | 264.3428688 | 264.3450528 | 264.325136 | 264.3145264 | 264.0804192 | 261.0838824 |
| 264.344232 | 264.3428688 | 264.3460528 | 264.325136 | 264.3125264 | 264.0794192 | 261.0818824 |
| 264.344232 | 264.3448688 | 264.3450528 | 264.325136 | 264.3125264 | 264.0794192 | 261.0808824 |
| 264.345232 | 264.3438688 | 264.3460528 | 264.326136 | 264.3135264 | 264.0814192 | 261.0818824 |
| 264.343232 | 264.3428688 | 264.3440528 | 264.326136 | 264.3135264 | 264.0774192 | 261.0818824 |
| 264.343232 | 264.3438688 | 264.3460528 | 264.328136 | 264.3145264 | 264.0804192 | 261.0818824 |
| 264.346232 | 264.3458688 | 264.3470528 | 264.329136 | 264.3155264 | 264.0834192 | 261.0828824 |
| 264.347232 | 264.3448688 | 264.3460528 | 264.329136 | 264.3175264 | 264.0854192 | 261.0848824 |
| 264.345232 | 264.3448688 | 264.3460528 | 264.329136 | 264.3155264 | 264.0814192 | 261.0828824 |
| 264.343232 | 264.3438688 | 264.3450528 | 264.327136 | 264.3125264 | 264.0824192 | 261.0818824 |
| 264.344232 | 264.3468688 | 264.3470528 | 264.330136 | 264.3145264 | 264.0814192 | 261.0828824 |
| 264.346232 | 264.3458688 | 264.3450528 | 264.329136 | 264.3145264 | 264.0844192 | 261.0828824 |
| 264.346232 | 264.3468688 | 264.3470528 | 264.327136 | 264.3155264 | 264.0834192 | 261.0848824 |
| 264.344232 | 264.3468688 | 264.3450528 | 264.327136 | 264.3155264 | 264.0834192 | 261.0828824 |
| 264.347232 | 264.3468688 | 264.3460528 | 264.329136 | 264.3175264 | 264.0884192 | 261.0828824 |
| 264.347232 | 264.3468688 | 264.3460528 | 264.329136 | 264.3175264 | 264.0864192 | 261.0828824 |
| 264.346232 | 264.3458688 | 264.3430528 | 264.327136 | 264.3155264 | 264.0834192 | 261.0828824 |
| 264.344232 | 264.3458688 | 264.3450528 | 264.327136 | 264.3165264 | 264.0824192 | 261.0828824 |
| 264.344232 | 264.3468688 | 264.3450528 | 264.329136 | 264.3155264 | 264.0854192 | 261.0848824 |

|            |             |             |            |             |             |             |
|------------|-------------|-------------|------------|-------------|-------------|-------------|
| 264.346232 | 264.3468688 | 264.3480528 | 264.327136 | 264.3175264 | 264.0854192 | 261.0808824 |
| 264.346232 | 264.3458688 | 264.3450528 | 264.327136 | 264.3155264 | 264.0854192 | 261.0828824 |
| 264.347232 | 264.3468688 | 264.3480528 | 264.329136 | 264.3195264 | 264.0854192 | 261.0848824 |
| 264.348232 | 264.3468688 | 264.3480528 | 264.329136 | 264.3175264 | 264.0834192 | 261.0828824 |
| 264.347232 | 264.3468688 | 264.3480528 | 264.330136 | 264.3155264 | 264.0854192 | 261.0828824 |
| 264.347232 | 264.3448688 | 264.3460528 | 264.327136 | 264.3155264 | 264.0854192 | 261.0828824 |
| 264.343232 | 264.3448688 | 264.3440528 | 264.326136 | 264.3155264 | 264.0814192 | 261.0788824 |
| 264.345232 | 264.3458688 | 264.3470528 | 264.328136 | 264.3165264 | 264.0844192 | 261.0818824 |
| 264.345232 | 264.3458688 | 264.3450528 | 264.328136 | 264.3155264 | 264.0864192 | 261.0818824 |
| 264.345232 | 264.3448688 | 264.3450528 | 264.328136 | 264.3155264 | 264.0824192 | 261.0808824 |
| 264.345232 | 264.3458688 | 264.3450528 | 264.328136 | 264.3145264 | 264.0824192 | 261.0818824 |
| 264.344232 | 264.3448688 | 264.3440528 | 264.327136 | 264.3155264 | 264.0794192 | 261.0788824 |
| 264.343232 | 264.3448688 | 264.3450528 | 264.328136 | 264.3145264 | 264.0824192 | 261.0818824 |
| 264.344232 | 264.3428688 | 264.3440528 | 264.327136 | 264.3135264 | 264.0814192 | 261.0818824 |
| 264.343232 | 264.3448688 | 264.3470528 | 264.326136 | 264.3145264 | 264.0824192 | 261.0808824 |
| 264.345232 | 264.3438688 | 264.3470528 | 264.328136 | 264.3145264 | 264.0844192 | 261.0798824 |
| 264.344232 | 264.3438688 | 264.3470528 | 264.329136 | 264.3145264 | 264.0824192 | 261.0828824 |
| 264.344232 | 264.3438688 | 264.3460528 | 264.327136 | 264.3155264 | 264.0814192 | 261.0808824 |
| 264.347232 | 264.3468688 | 264.3480528 | 264.329136 | 264.3155264 | 264.0834192 | 261.0828824 |
| 264.346232 | 264.3458688 | 264.3460528 | 264.327136 | 264.3155264 | 264.0834192 | 261.0808824 |
| 264.345232 | 264.3438688 | 264.3470528 | 264.328136 | 264.3125264 | 264.0804192 | 261.0818824 |
| 264.346232 | 264.3428688 | 264.3440528 | 264.327136 | 264.3115264 | 264.0834192 | 261.0818824 |
| 264.346232 | 264.3448688 | 264.3480528 | 264.328136 | 264.3135264 | 264.0814192 | 261.0808824 |
| 264.345232 | 264.3438688 | 264.3450528 | 264.327136 | 264.3145264 | 264.0824192 | 261.0808824 |
| 264.343232 | 264.3418688 | 264.3440528 | 264.326136 | 264.3125264 | 264.0774192 | 261.0798824 |
| 264.345232 | 264.3438688 | 264.3470528 | 264.327136 | 264.3145264 | 264.0774192 | 261.0808824 |
| 264.346232 | 264.3448688 | 264.3450528 | 264.325136 | 264.3155264 | 264.0834192 | 261.0828824 |
| 264.345232 | 264.3438688 | 264.3440528 | 264.326136 | 264.3145264 | 264.0824192 | 261.0798824 |
| 264.347232 | 264.3438688 | 264.3470528 | 264.327136 | 264.3145264 | 264.0824192 | 261.0808824 |
| 264.346232 | 264.3438688 | 264.3460528 | 264.329136 | 264.3145264 | 264.0814192 | 261.0828824 |
| 264.345232 | 264.3438688 | 264.3470528 | 264.330136 | 264.3155264 | 264.0844192 | 261.0818824 |
| 264.347232 | 264.3458688 | 264.3450528 | 264.328136 | 264.3155264 | 264.0844192 | 261.0818824 |
| 264.346232 | 264.3428688 | 264.3420528 | 264.327136 | 264.3135264 | 264.0814192 | 261.0808824 |
| 264.345232 | 264.3418688 | 264.3430528 | 264.326136 | 264.3155264 | 264.0804192 | 261.0798824 |
| 264.346232 | 264.3448688 | 264.3460528 | 264.329136 | 264.3165264 | 264.0854192 | 261.0828824 |
| 264.348232 | 264.3468688 | 264.3460528 | 264.329136 | 264.3165264 | 264.0834192 | 261.0838824 |
| 264.346232 | 264.3468688 | 264.3440528 | 264.329136 | 264.3165264 | 264.0854192 | 261.0838824 |
| 264.347232 | 264.3448688 | 264.3430528 | 264.329136 | 264.3155264 | 264.0824192 | 261.0818824 |
| 264.348232 | 264.3478688 | 264.3470528 | 264.329136 | 264.3175264 | 264.0844192 | 261.0828824 |
| 264.346232 | 264.3468688 | 264.3440528 | 264.328136 | 264.3165264 | 264.0834192 | 261.0818824 |
| 264.346232 | 264.3468688 | 264.3440528 | 264.328136 | 264.3185264 | 264.0824192 | 261.0818824 |
| 264.348232 | 264.3458688 | 264.3450528 | 264.330136 | 264.3185264 | 264.0844192 | 261.0808824 |
| 264.347232 | 264.3448688 | 264.3450528 | 264.329136 | 264.3165264 | 264.0864192 | 261.0808824 |
| 264.349232 | 264.3478688 | 264.3470528 | 264.330136 | 264.3185264 | 264.0864192 | 261.0828824 |
| 264.349232 | 264.3478688 | 264.3470528 | 264.330136 | 264.3205264 | 264.0904192 | 261.0828824 |
| 264.347232 | 264.3478688 | 264.3450528 | 264.331136 | 264.3195264 | 264.0864192 | 261.0828824 |
| 264.346232 | 264.3468688 | 264.3430528 | 264.329136 | 264.3165264 | 264.0854192 | 261.0818824 |

|            |             |             |            |             |             |             |
|------------|-------------|-------------|------------|-------------|-------------|-------------|
| 264.349232 | 264.3478688 | 264.3440528 | 264.329136 | 264.3195264 | 264.0874192 | 261.0818824 |
| 264.348232 | 264.3478688 | 264.3460528 | 264.331136 | 264.3195264 | 264.0874192 | 261.0828824 |
| 264.349232 | 264.3488688 | 264.3450528 | 264.332136 | 264.3195264 | 264.0884192 | 261.0828824 |
| 264.347232 | 264.3468688 | 264.3430528 | 264.328136 | 264.3185264 | 264.0844192 | 261.0808824 |
| 264.348232 | 264.3468688 | 264.3440528 | 264.330136 | 264.3175264 | 264.0834192 | 261.0828824 |
| 264.348232 | 264.3468688 | 264.3440528 | 264.329136 | 264.3195264 | 264.0854192 | 261.0798824 |
| 264.347232 | 264.3478688 | 264.3450528 | 264.331136 | 264.3185264 | 264.0864192 | 261.0818824 |
| 264.349232 | 264.3488688 | 264.3430528 | 264.331136 | 264.3185264 | 264.0864192 | 261.0798824 |
| 264.348232 | 264.3478688 | 264.3460528 | 264.329136 | 264.3185264 | 264.0894192 | 261.0798824 |
| 264.346232 | 264.3478688 | 264.3460528 | 264.330136 | 264.3195264 | 264.0894192 | 261.0808824 |
| 264.345232 | 264.3478688 | 264.3450528 | 264.330136 | 264.3175264 | 264.0894192 | 261.0788824 |
| 264.347232 | 264.3498688 | 264.3470528 | 264.332136 | 264.3175264 | 264.0884192 | 261.0808824 |
| 264.345232 | 264.3478688 | 264.3440528 | 264.331136 | 264.3155264 | 264.0844192 | 261.0788824 |
| 264.345232 | 264.3478688 | 264.3430528 | 264.329136 | 264.3175264 | 264.0864192 | 261.0798824 |
| 264.348232 | 264.3488688 | 264.3480528 | 264.331136 | 264.3185264 | 264.0894192 | 261.0828824 |
| 264.346232 | 264.3478688 | 264.3450528 | 264.330136 | 264.3175264 | 264.0854192 | 261.0808824 |
| 264.348232 | 264.3478688 | 264.3440528 | 264.328136 | 264.3195264 | 264.0874192 | 261.0788824 |
| 264.348232 | 264.3498688 | 264.3450528 | 264.330136 | 264.3185264 | 264.0874192 | 261.0808824 |
| 264.349232 | 264.3468688 | 264.3440528 | 264.330136 | 264.3185264 | 264.0864192 | 261.0808824 |
| 264.347232 | 264.3468688 | 264.3460528 | 264.329136 | 264.3185264 | 264.0864192 | 261.0808824 |
| 264.349232 | 264.3488688 | 264.3450528 | 264.329136 | 264.3195264 | 264.0854192 | 261.0818824 |
| 264.347232 | 264.3458688 | 264.3440528 | 264.330136 | 264.3185264 | 264.0844192 | 261.0818824 |
| 264.349232 | 264.3488688 | 264.3450528 | 264.330136 | 264.3205264 | 264.0864192 | 261.0838824 |
| 264.347232 | 264.3448688 | 264.3440528 | 264.329136 | 264.3185264 | 264.0844192 | 261.0818824 |
| 264.345232 | 264.3458688 | 264.3440528 | 264.329136 | 264.3185264 | 264.0844192 | 261.0798824 |
| 264.348232 | 264.3458688 | 264.3470528 | 264.330136 | 264.3185264 | 264.0884192 | 261.0818824 |
| 264.346232 | 264.3458688 | 264.3450528 | 264.330136 | 264.3175264 | 264.0834192 | 261.0808824 |
| 264.347232 | 264.3458688 | 264.3460528 | 264.329136 | 264.3175264 | 264.0844192 | 261.0808824 |
| 264.347232 | 264.3458688 | 264.3480528 | 264.330136 | 264.3175264 | 264.0844192 | 261.0828824 |
| 264.347232 | 264.3478688 | 264.3460528 | 264.329136 | 264.3175264 | 264.0904192 | 261.0798824 |
| 264.347232 | 264.3458688 | 264.3480528 | 264.330136 | 264.3175264 | 264.0864192 | 261.0798824 |
| 264.346232 | 264.3468688 | 264.3460528 | 264.331136 | 264.3165264 | 264.0854192 | 261.0808824 |
| 264.345232 | 264.3448688 | 264.3460528 | 264.329136 | 264.3155264 | 264.0884192 | 261.0798824 |
| 264.347232 | 264.3448688 | 264.3460528 | 264.328136 | 264.3155264 | 264.0824192 | 261.0798824 |
| 264.345232 | 264.3468688 | 264.3470528 | 264.329136 | 264.3175264 | 264.0844192 | 261.0798824 |
| 264.346232 | 264.3458688 | 264.3450528 | 264.328136 | 264.3165264 | 264.0874192 | 261.0808824 |
| 264.347232 | 264.3468688 | 264.3480528 | 264.330136 | 264.3195264 | 264.0884192 | 261.0818824 |
| 264.346232 | 264.3458688 | 264.3470528 | 264.330136 | 264.3185264 | 264.0854192 | 261.0808824 |
| 264.346232 | 264.3468688 | 264.3470528 | 264.330136 | 264.3165264 | 264.0854192 | 261.0808824 |
| 264.348232 | 264.3468688 | 264.3470528 | 264.330136 | 264.3185264 | 264.0874192 | 261.0828824 |
| 264.347232 | 264.3458688 | 264.3430528 | 264.329136 | 264.3165264 | 264.0844192 | 261.0808824 |
| 264.345232 | 264.3458688 | 264.3420528 | 264.327136 | 264.3175264 | 264.0844192 | 261.0798824 |
| 264.346232 | 264.3478688 | 264.3490528 | 264.330136 | 264.3185264 | 264.0854192 | 261.0838824 |
| 264.345232 | 264.3448688 | 264.3440528 | 264.327136 | 264.3155264 | 264.0844192 | 261.0798824 |
| 264.346232 | 264.3458688 | 264.3450528 | 264.329136 | 264.3195264 | 264.0894192 | 261.0788824 |
| 264.346232 | 264.3468688 | 264.3460528 | 264.328136 | 264.3165264 | 264.0834192 | 261.0818824 |
| 264.345232 | 264.3488688 | 264.3480528 | 264.330136 | 264.3175264 | 264.0864192 | 261.0818824 |

|            |             |             |            |             |             |             |
|------------|-------------|-------------|------------|-------------|-------------|-------------|
| 264.348232 | 264.3488688 | 264.3440528 | 264.328136 | 264.3175264 | 264.0854192 | 261.0818824 |
| 264.347232 | 264.3488688 | 264.3470528 | 264.329136 | 264.3175264 | 264.0824192 | 261.0818824 |
| 264.346232 | 264.3468688 | 264.3460528 | 264.328136 | 264.3165264 | 264.0814192 | 261.0808824 |
| 264.347232 | 264.3488688 | 264.3460528 | 264.328136 | 264.3175264 | 264.0844192 | 261.0818824 |
| 264.347232 | 264.3488688 | 264.3470528 | 264.328136 | 264.3175264 | 264.0844192 | 261.0838824 |
| 264.346232 | 264.3468688 | 264.3460528 | 264.328136 | 264.3165264 | 264.0834192 | 261.0818824 |
| 264.345232 | 264.3488688 | 264.3460528 | 264.326136 | 264.3155264 | 264.0844192 | 261.0818824 |
| 264.343232 | 264.3458688 | 264.3440528 | 264.324136 | 264.3135264 | 264.0824192 | 261.0818824 |
| 264.345232 | 264.3468688 | 264.3440528 | 264.328136 | 264.3155264 | 264.0824192 | 261.0818824 |
| 264.345232 | 264.3458688 | 264.3460528 | 264.328136 | 264.3155264 | 264.0824192 | 261.0808824 |
| 264.345232 | 264.3468688 | 264.3460528 | 264.328136 | 264.3155264 | 264.0824192 | 261.0838824 |
| 264.345232 | 264.3448688 | 264.3450528 | 264.324136 | 264.3155264 | 264.0824192 | 261.0798824 |
| 264.345232 | 264.3448688 | 264.3470528 | 264.326136 | 264.3175264 | 264.0864192 | 261.0798824 |
| 264.345232 | 264.3448688 | 264.3450528 | 264.329136 | 264.3175264 | 264.0804192 | 261.0818824 |
| 264.343232 | 264.3448688 | 264.3450528 | 264.326136 | 264.3155264 | 264.0824192 | 261.0798824 |
| 264.344232 | 264.3448688 | 264.3450528 | 264.327136 | 264.3155264 | 264.0824192 | 261.0818824 |
| 264.345232 | 264.3448688 | 264.3450528 | 264.326136 | 264.3155264 | 264.0824192 | 261.0788824 |
| 264.344232 | 264.3468688 | 264.3470528 | 264.329136 | 264.3165264 | 264.0834192 | 261.0818824 |
| 264.345232 | 264.3448688 | 264.3470528 | 264.326136 | 264.3155264 | 264.0804192 | 261.0798824 |
| 264.345232 | 264.3448688 | 264.3440528 | 264.326136 | 264.3155264 | 264.0824192 | 261.0798824 |
| 264.343232 | 264.3448688 | 264.3440528 | 264.324136 | 264.3155264 | 264.0804192 | 261.0798824 |
| 264.343232 | 264.3448688 | 264.3450528 | 264.326136 | 264.3155264 | 264.0844192 | 261.0818824 |
| 264.343232 | 264.3448688 | 264.3440528 | 264.326136 | 264.3155264 | 264.0864192 | 261.0798824 |
| 264.345232 | 264.3468688 | 264.3450528 | 264.326136 | 264.3175264 | 264.0844192 | 261.0798824 |
| 264.344232 | 264.3448688 | 264.3470528 | 264.329136 | 264.3165264 | 264.0824192 | 261.0818824 |
| 264.344232 | 264.3438688 | 264.3470528 | 264.327136 | 264.3165264 | 264.0854192 | 261.0788824 |
| 264.344232 | 264.3458688 | 264.3450528 | 264.327136 | 264.3155264 | 264.0854192 | 261.0818824 |
| 264.343232 | 264.3418688 | 264.3440528 | 264.326136 | 264.3135264 | 264.0824192 | 261.0788824 |
| 264.343232 | 264.3438688 | 264.3440528 | 264.326136 | 264.3155264 | 264.0844192 | 261.0798824 |
| 264.343232 | 264.3418688 | 264.3440528 | 264.324136 | 264.3155264 | 264.0844192 | 261.0798824 |
| 264.344232 | 264.3448688 | 264.3450528 | 264.326136 | 264.3155264 | 264.0834192 | 261.0798824 |
| 264.342232 | 264.3428688 | 264.3450528 | 264.326136 | 264.3155264 | 264.0824192 | 261.0798824 |
| 264.344232 | 264.3448688 | 264.3460528 | 264.325136 | 264.3145264 | 264.0814192 | 261.0818824 |
| 264.342232 | 264.3428688 | 264.3450528 | 264.325136 | 264.3135264 | 264.0794192 | 261.0798824 |
| 264.343232 | 264.3458688 | 264.3460528 | 264.325136 | 264.3145264 | 264.0864192 | 261.0808824 |
| 264.342232 | 264.3448688 | 264.3430528 | 264.324136 | 264.3155264 | 264.0824192 | 261.07      |



|            |             |             |            |             |             |             |
|------------|-------------|-------------|------------|-------------|-------------|-------------|
| 264.340232 | 264.3418688 | 264.3450528 | 264.323136 | 264.3115264 | 264.0814192 | 261.0788824 |
| 264.342232 | 264.3418688 | 264.3450528 | 264.323136 | 264.3105264 | 264.0814192 | 261.0818824 |
| 264.341232 | 264.3408688 | 264.3440528 | 264.323136 | 264.3105264 | 264.0824192 | 261.0788824 |
| 264.344232 | 264.3438688 | 264.3450528 | 264.325136 | 264.3135264 | 264.0804192 | 261.0818824 |
| 264.342232 | 264.3458688 | 264.3470528 | 264.325136 | 264.3135264 | 264.0814192 | 261.0808824 |
| 264.341232 | 264.3428688 | 264.3440528 | 264.323136 | 264.3125264 | 264.0824192 | 261.0808824 |
| 264.342232 | 264.3438688 | 264.3430528 | 264.325136 | 264.3115264 | 264.0814192 | 261.0808824 |
| 264.339232 | 264.3428688 | 264.3440528 | 264.325136 | 264.3105264 | 264.0784192 | 261.0788824 |
| 264.341232 | 264.3428688 | 264.3440528 | 264.323136 | 264.3125264 | 264.0804192 | 261.0808824 |
| 264.341232 | 264.3408688 | 264.3440528 | 264.323136 | 264.3125264 | 264.0824192 | 261.0788824 |
| 264.341232 | 264.3428688 | 264.3440528 | 264.325136 | 264.3125264 | 264.0824192 | 261.0788824 |
| 264.340232 | 264.3418688 | 264.3450528 | 264.323136 | 264.3115264 | 264.0814192 | 261.0788824 |
| 264.340232 | 264.3418688 | 264.3410528 | 264.323136 | 264.3115264 | 264.0814192 | 261.0788824 |
| 264.343232 | 264.3428688 | 264.3460528 | 264.326136 | 264.3105264 | 264.0824192 | 261.0798824 |
| 264.343232 | 264.3428688 | 264.3440528 | 264.326136 | 264.3125264 | 264.0804192 | 261.0798824 |
| 264.342232 | 264.3418688 | 264.3430528 | 264.324136 | 264.3115264 | 264.0764192 | 261.0788824 |
| 264.341232 | 264.3418688 | 264.3440528 | 264.322136 | 264.3125264 | 264.0814192 | 261.0788824 |
| 264.340232 | 264.3418688 | 264.3430528 | 264.323136 | 264.3115264 | 264.0764192 | 261.0788824 |
| 264.343232 | 264.3448688 | 264.3460528 | 264.326136 | 264.3145264 | 264.0804192 | 261.0798824 |
| 264.341232 | 264.3438688 | 264.3440528 | 264.324136 | 264.3105264 | 264.0804192 | 261.0788824 |
| 264.342232 | 264.3428688 | 264.3450528 | 264.324136 | 264.3115264 | 264.0834192 | 261.0798824 |
| 264.343232 | 264.3418688 | 264.3460528 | 264.324136 | 264.3105264 | 264.0824192 | 261.0798824 |
| 264.342232 | 264.3448688 | 264.3460528 | 264.325136 | 264.3135264 | 264.0834192 | 261.0808824 |
| 264.344232 | 264.3458688 | 264.3460528 | 264.325136 | 264.3135264 | 264.0854192 | 261.0828824 |
| 264.344232 | 264.3458688 | 264.3460528 | 264.327136 | 264.3135264 | 264.0814192 | 261.0808824 |
| 264.340232 | 264.3428688 | 264.3450528 | 264.324136 | 264.3115264 | 264.0794192 | 261.0798824 |
| 264.341232 | 264.3448688 | 264.3460528 | 264.325136 | 264.3135264 | 264.0794192 | 261.0828824 |
| 264.340232 | 264.3418688 | 264.3420528 | 264.322136 | 264.3085264 | 264.0794192 | 261.0798824 |
| 264.343232 | 264.3448688 | 264.3460528 | 264.325136 | 264.3135264 | 264.0794192 | 261.0808824 |
| 264.340232 | 264.3428688 | 264.3450528 | 264.325136 | 264.3115264 | 264.0814192 | 261.0798824 |
| 264.342232 | 264.3428688 | 264.3430528 | 264.323136 | 264.3095264 | 264.0814192 | 261.0798824 |
| 264.341232 | 264.3428688 | 264.3460528 | 264.325136 | 264.3115264 | 264.0804192 | 261.0808824 |
| 264.341232 | 264.3438688 | 264.3460528 | 264.321136 | 264.3115264 | 264.0784192 | 261.0808824 |
| 264.342232 | 264.3438688 | 264.3440528 | 264.324136 | 264.3105264 | 264.0834192 | 261.0798824 |
| 264.342232 | 264.3438688 | 264.3450528 | 264.324136 | 264.3115264 | 264.0834192 | 261.0818824 |
| 264.339232 | 264.3418688 | 264.3440528 | 264.322136 | 264.3095264 | 264.0794192 | 261.0798824 |
| 264.341232 | 264.3428688 | 264.3460528 | 264.324136 | 264.3115264 | 264.0824192 | 261.0798824 |
| 264.338232 | 264.3418688 | 264.3440528 | 264.322136 | 264.3095264 | 264.0824192 | 261.0768824 |
| 264.341232 | 264.3448688 | 264.3440528 | 264.325136 | 264.3115264 | 264.0824192 | 261.0778824 |
| 264.339232 | 264.3408688 | 264.3410528 | 264.322136 | 264.3095264 | 264.0774192 | 261.0768824 |
| 264.341232 | 264.3418688 | 264.3420528 | 264.324136 | 264.3115264 | 264.0784192 | 261.0758824 |
| 264.341232 | 264.3428688 | 264.3440528 | 264.324136 | 264.3115264 | 264.0804192 | 261.0798824 |
| 264.339232 | 264.3418688 | 264.3430528 | 264.322136 | 264.3095264 | 264.0774192 | 261.0778824 |
| 264.341232 | 264.3398688 | 264.3420528 | 264.322136 | 264.3095264 | 264.0804192 | 261.0778824 |
| 264.339232 | 264.3418688 | 264.3400528 | 264.322136 | 264.3095264 | 264.0804192 | 261.0758824 |
| 264.339232 | 264.3398688 | 264.3400528 | 264.322136 | 264.3075264 | 264.0784192 | 261.0758824 |
| 264.339232 | 264.3408688 | 264.3410528 | 264.321136 | 264.3085264 | 264.0774192 | 261.0768824 |

|            |             |             |            |             |             |             |
|------------|-------------|-------------|------------|-------------|-------------|-------------|
| 264.339232 | 264.3398688 | 264.3400528 | 264.324136 | 264.3075264 | 264.0784192 | 261.0758824 |
| 264.341232 | 264.3418688 | 264.3420528 | 264.324136 | 264.3095264 | 264.0784192 | 261.0758824 |
| 264.340232 | 264.3418688 | 264.3440528 | 264.323136 | 264.3105264 | 264.0834192 | 261.0778824 |
| 264.340232 | 264.3398688 | 264.3440528 | 264.323136 | 264.3095264 | 264.0794192 | 261.0778824 |
| 264.340232 | 264.3408688 | 264.3430528 | 264.323136 | 264.3105264 | 264.0824192 | 261.0788824 |
| 264.339232 | 264.3408688 | 264.3420528 | 264.323136 | 264.3085264 | 264.0804192 | 261.0748824 |
| 264.337232 | 264.3408688 | 264.3420528 | 264.321136 | 264.3085264 | 264.0774192 | 261.0768824 |
| 264.339232 | 264.3408688 | 264.3420528 | 264.322136 | 264.3095264 | 264.0784192 | 261.0768824 |
| 264.340232 | 264.3418688 | 264.3420528 | 264.324136 | 264.3095264 | 264.0794192 | 261.0778824 |
| 264.340232 | 264.3418688 | 264.3420528 | 264.324136 | 264.3115264 | 264.0794192 | 261.0768824 |
| 264.339232 | 264.3388688 | 264.3420528 | 264.322136 | 264.3115264 | 264.0804192 | 261.0778824 |
| 264.338232 | 264.3408688 | 264.3440528 | 264.322136 | 264.3115264 | 264.0784192 | 261.0778824 |
| 264.338232 | 264.3408688 | 264.3450528 | 264.320136 | 264.3105264 | 264.0794192 | 261.0778824 |
| 264.339232 | 264.3388688 | 264.3440528 | 264.322136 | 264.3105264 | 264.0804192 | 261.0788824 |
| 264.338232 | 264.3398688 | 264.3420528 | 264.320136 | 264.3095264 | 264.0794192 | 261.0758824 |
| 264.339232 | 264.3408688 | 264.3450528 | 264.321136 | 264.3105264 | 264.0844192 | 261.0788824 |
| 264.339232 | 264.3408688 | 264.3450528 | 264.322136 | 264.3105264 | 264.0804192 | 261.0798824 |
| 264.338232 | 264.3398688 | 264.3440528 | 264.319136 | 264.3075264 | 264.0774192 | 261.0768824 |
| 264.340232 | 264.3398688 | 264.3440528 | 264.321136 | 264.3115264 | 264.0774192 | 261.0788824 |
| 264.340232 | 264.3418688 | 264.3440528 | 264.321136 | 264.3095264 | 264.0814192 | 261.0768824 |
| 264.340232 | 264.3398688 | 264.3440528 | 264.321136 | 264.3095264 | 264.0794192 | 261.0798824 |
| 264.338232 | 264.3418688 | 264.3440528 | 264.319136 | 264.3075264 | 264.0794192 | 261.0768824 |
| 264.336232 | 264.3398688 | 264.3420528 | 264.319136 | 264.3075264 | 264.0814192 | 261.0748824 |
| 264.338232 | 264.3398688 | 264.3430528 | 264.319136 | 264.3075264 | 264.0814192 | 261.0768824 |
| 264.336232 | 264.3398688 | 264.3430528 | 264.319136 | 264.3075264 | 264.0794192 | 261.0748824 |
| 264.338232 | 264.3398688 | 264.3430528 | 264.321136 | 264.3095264 | 264.0794192 | 261.0768824 |
| 264.339232 | 264.3398688 | 264.3430528 | 264.322136 | 264.3085264 | 264.0784192 | 261.0778824 |
| 264.339232 | 264.3408688 | 264.3430528 | 264.322136 | 264.3105264 | 264.0784192 | 261.0768824 |
| 264.339232 | 264.3408688 | 264.3440528 | 264.322136 | 264.3085264 | 264.0824192 | 261.0758824 |
| 264.339232 | 264.3408688 | 264.3440528 | 264.322136 | 264.3085264 | 264.0804192 | 261.0778824 |
| 264.338232 | 264.3408688 | 264.3420528 | 264.323136 | 264.3085264 | 264.0814192 | 261.0778824 |
| 264.340232 | 264.3408688 | 264.3440528 | 264.322136 | 264.3085264 | 264.0774192 | 261.0758824 |
| 264.339232 | 264.3418688 | 264.3430528 | 264.321136 | 264.3095264 | 264.0804192 | 261.0768824 |
| 264.338232 | 264.3388688 | 264.3420528 | 264.320136 | 264.3075264 | 264.0814192 | 261.0758824 |
| 264.339232 | 264.3418688 | 264.3430528 | 264.323136 | 264.3095264 | 264.0784192 | 261.0768824 |
| 264.338232 | 264.3408688 | 264.3420528 | 264.322136 | 264.3075264 | 264.0794192 | 261.0758824 |
| 264.337232 | 264.3398688 | 264.3410528 | 264.321136 | 264.3075264 | 264.0804192 | 261.0768824 |
| 264.338232 | 264.3398688 | 264.3420528 | 264.319136 | 264.3085264 | 264.0794192 | 261.0788824 |
| 264.340232 | 264.3398688 | 264.3440528 | 264.322136 | 264.3115264 | 264.0834192 | 261.0768824 |
| 264.338232 | 264.3398688 | 264.3420528 | 264.320136 | 264.3085264 | 264.0794192 | 261.0748824 |
| 264.339232 | 264.3428688 | 264.3450528 | 264.321136 | 264.3115264 | 264.0824192 | 261.0778824 |
| 264.337232 | 264.3378688 | 264.3410528 | 264.318136 | 264.3065264 | 264.0794192 | 261.0728824 |
| 264.339232 | 264.3398688 | 264.3430528 | 264.320136 | 264.3095264 | 264.0804192 | 261.0748824 |
| 264.340232 | 264.3398688 | 264.3420528 | 264.321136 | 264.3075264 | 264.0804192 | 261.0758824 |
| 264.338232 | 264.3388688 | 264.3420528 | 264.319136 | 264.3065264 | 264.0794192 | 261.0738824 |
| 264.337232 | 264.3388688 | 264.3430528 | 264.319136 | 264.3085264 | 264.0784192 | 261.0768824 |
| 264.338232 | 264.3398688 | 264.3420528 | 264.320136 | 264.3075264 | 264.0814192 | 261.0748824 |

|            |             |             |            |             |             |             |
|------------|-------------|-------------|------------|-------------|-------------|-------------|
| 264.339232 | 264.3408688 | 264.3430528 | 264.321136 | 264.3095264 | 264.0804192 | 261.0758824 |
| 264.337232 | 264.3398688 | 264.3430528 | 264.319136 | 264.3085264 | 264.0784192 | 261.0758824 |
| 264.338232 | 264.3388688 | 264.3400528 | 264.319136 | 264.3075264 | 264.0814192 | 261.0738824 |
| 264.338232 | 264.3398688 | 264.3410528 | 264.320136 | 264.3075264 | 264.0794192 | 261.0748824 |
| 264.338232 | 264.3378688 | 264.3420528 | 264.320136 | 264.3055264 | 264.0794192 | 261.0728824 |
| 264.337232 | 264.3378688 | 264.3400528 | 264.319136 | 264.3055264 | 264.0754192 | 261.0738824 |
| 264.339232 | 264.3408688 | 264.3420528 | 264.320136 | 264.3075264 | 264.0824192 | 261.0758824 |
| 264.338232 | 264.3378688 | 264.3410528 | 264.318136 | 264.3065264 | 264.0794192 | 261.0748824 |
| 264.338232 | 264.3388688 | 264.3430528 | 264.321136 | 264.3065264 | 264.0784192 | 261.0758824 |
| 264.341232 | 264.3398688 | 264.3440528 | 264.321136 | 264.3075264 | 264.0794192 | 261.0748824 |
| 264.340232 | 264.3388688 | 264.3430528 | 264.320136 | 264.3085264 | 264.0794192 | 261.0748824 |
| 264.338232 | 264.3388688 | 264.3420528 | 264.320136 | 264.3065264 | 264.0794192 | 261.0728824 |
| 264.339232 | 264.3388688 | 264.3440528 | 264.319136 | 264.3075264 | 264.0784192 | 261.0758824 |
| 264.341232 | 264.3408688 | 264.3440528 | 264.322136 | 264.3085264 | 264.0804192 | 261.0798824 |
| 264.340232 | 264.3388688 | 264.3430528 | 264.321136 | 264.3075264 | 264.0794192 | 261.0758824 |
| 264.338232 | 264.3388688 | 264.3450528 | 264.319136 | 264.3055264 | 264.0794192 | 261.0738824 |
| 264.337232 | 264.3388688 | 264.3440528 | 264.321136 | 264.3065264 | 264.0784192 | 261.0748824 |
| 264.340232 | 264.3398688 | 264.3450528 | 264.322136 | 264.3065264 | 264.0794192 | 261.0748824 |
| 264.338232 | 264.3388688 | 264.3430528 | 264.320136 | 264.3065264 | 264.0784192 | 261.0728824 |
| 264.339232 | 264.3398688 | 264.3430528 | 264.320136 | 264.3055264 | 264.0794192 | 261.0748824 |
| 264.340232 | 264.3388688 | 264.3440528 | 264.321136 | 264.3085264 | 264.0794192 | 261.0738824 |
| 264.340232 | 264.3388688 | 264.3420528 | 264.319136 | 264.3065264 | 264.0794192 | 261.0718824 |
| 264.340232 | 264.3398688 | 264.3440528 | 264.322136 | 264.3085264 | 264.0784192 | 261.0748824 |
| 264.339232 | 264.3398688 | 264.3430528 | 264.321136 | 264.3065264 | 264.0814192 | 261.0738824 |
| 264.340232 | 264.3408688 | 264.3440528 | 264.322136 | 264.3095264 | 264.0804192 | 261.0768824 |
| 264.337232 | 264.3378688 | 264.3410528 | 264.319136 | 264.3045264 | 264.0794192 | 261.0728824 |
| 264.340232 | 264.3388688 | 264.3420528 | 264.321136 | 264.3075264 | 264.0794192 | 261.0748824 |
| 264.342232 | 264.3388688 | 264.3440528 | 264.321136 | 264.3075264 | 264.0794192 | 261.0748824 |
| 264.341232 | 264.3388688 | 264.3430528 | 264.320136 | 264.3085264 | 264.0794192 | 261.0768824 |
| 264.336232 | 264.3378688 | 264.3400528 | 264.319136 | 264.3055264 | 264.0764192 | 261.0718824 |
| 264.341232 | 264.3388688 | 264.3430528 | 264.320136 | 264.3085264 | 264.0804192 | 261.0758824 |
| 264.340232 | 264.3398688 | 264.3440528 | 264.321136 | 264.3075264 | 264.0784192 | 261.0758824 |
| 264.341232 | 264.3418688 | 264.3440528 | 264.321136 | 264.3075264 | 264.0794192 | 261.0758824 |
| 264.339232 | 264.3398688 | 264.3440528 | 264.318136 | 264.3055264 | 264.0794192 | 261.0738824 |
| 264.341232 | 264.3398688 | 264.3430528 | 264.322136 | 264.3065264 | 264.0794192 | 261.0738824 |
| 264.340232 | 264.3398688 | 264.3420528 | 264.322136 | 264.3085264 | 264.0804192 | 261.0768824 |
| 264.340232 | 264.3398688 | 264.3420528 | 264.320136 | 264.3065264 | 264.0764192 | 261.0738824 |
| 264.338232 | 264.3388688 | 264.3420528 | 264.320136 | 264.3065264 | 264.0794192 | 261.0728824 |
| 264.342232 | 264.3408688 | 264.3450528 | 264.321136 | 264.3095264 | 264.0804192 | 261.0758824 |
| 264.338232 | 264.3378688 | 264.3420528 | 264.320136 | 264.3045264 | 264.0764192 | 261.0728824 |
| 264.339232 | 264.3388688 | 264.3420528 | 264.318136 | 264.3075264 | 264.0774192 | 261.0748824 |
| 264.339232 | 264.3408688 | 264.3420528 | 264.320136 | 264.3075264 | 264.0774192 | 261.0748824 |
| 264.336232 | 264.3358688 | 264.3400528 | 264.320136 | 264.3065264 | 264.0774192 | 261.0748824 |
| 264.339232 | 264.3388688 | 264.3410528 | 264.320136 | 264.3075264 | 264.0794192 | 261.0738824 |
| 264.339232 | 264.3378688 | 264.3420528 | 264.320136 | 264.3055264 | 264.0754192 | 261.0728824 |
| 264.339232 | 264.3388688 | 264.3430528 | 264.320136 | 264.3075264 | 264.0804192 | 261.0728824 |
| 264.338232 | 264.3388688 | 264.3410528 | 264.318136 | 264.3065264 | 264.0764192 | 261.0738824 |

|            |             |             |            |             |             |             |
|------------|-------------|-------------|------------|-------------|-------------|-------------|
| 264.338232 | 264.3388688 | 264.3420528 | 264.319136 | 264.3045264 | 264.0784192 | 261.0758824 |
| 264.339232 | 264.3368688 | 264.3420528 | 264.321136 | 264.3065264 | 264.0794192 | 261.0748824 |
| 264.337232 | 264.3368688 | 264.3420528 | 264.321136 | 264.3065264 | 264.0774192 | 261.0738824 |
| 264.340232 | 264.3398688 | 264.3430528 | 264.320136 | 264.3075264 | 264.0784192 | 261.0748824 |
| 264.338232 | 264.3378688 | 264.3410528 | 264.320136 | 264.3055264 | 264.0764192 | 261.0718824 |
| 264.336232 | 264.3398688 | 264.3420528 | 264.320136 | 264.3065264 | 264.0774192 | 261.0728824 |
| 264.337232 | 264.3388688 | 264.3420528 | 264.319136 | 264.3065264 | 264.0774192 | 261.0738824 |
| 264.339232 | 264.3388688 | 264.3400528 | 264.319136 | 264.3065264 | 264.0774192 | 261.0738824 |
| 264.337232 | 264.3378688 | 264.3400528 | 264.316136 | 264.3045264 | 264.0774192 | 261.0738824 |
| 264.337232 | 264.3368688 | 264.3390528 | 264.317136 | 264.3055264 | 264.0764192 | 261.0718824 |
| 264.338232 | 264.3368688 | 264.3420528 | 264.317136 | 264.3055264 | 264.0764192 | 261.0738824 |
| 264.339232 | 264.3398688 | 264.3440528 | 264.320136 | 264.3085264 | 264.0794192 | 261.0728824 |
| 264.337232 | 264.3398688 | 264.3410528 | 264.320136 | 264.3065264 | 264.0764192 | 261.0748824 |
| 264.338232 | 264.3408688 | 264.3430528 | 264.320136 | 264.3075264 | 264.0784192 | 261.0738824 |
| 264.336232 | 264.3398688 | 264.3410528 | 264.318136 | 264.3065264 | 264.0804192 | 261.0708824 |
| 264.338232 | 264.3388688 | 264.3420528 | 264.318136 | 264.3055264 | 264.0774192 | 261.0738824 |
| 264.338232 | 264.3388688 | 264.3420528 | 264.319136 | 264.3055264 | 264.0744192 | 261.0718824 |
| 264.337232 | 264.3388688 | 264.3420528 | 264.319136 | 264.3075264 | 264.0774192 | 261.0718824 |
| 264.340232 | 264.3408688 | 264.3410528 | 264.319136 | 264.3085264 | 264.0784192 | 261.0748824 |
| 264.339232 | 264.3388688 | 264.3440528 | 264.319136 | 264.3065264 | 264.0754192 | 261.0718824 |
| 264.338232 | 264.3408688 | 264.3410528 | 264.319136 | 264.3085264 | 264.0764192 | 261.0768824 |
| 264.336232 | 264.3368688 | 264.3410528 | 264.318136 | 264.3045264 | 264.0764192 | 261.0728824 |
| 264.337232 | 264.3368688 | 264.3370528 | 264.317136 | 264.3045264 | 264.0754192 | 261.0708824 |
| 264.337232 | 264.3378688 | 264.3400528 | 264.318136 | 264.3055264 | 264.0764192 | 261.0738824 |
| 264.335232 | 264.3368688 | 264.3400528 | 264.318136 | 264.3055264 | 264.0754192 | 261.0728824 |
| 264.338232 | 264.3378688 | 264.3410528 | 264.321136 | 264.3065264 | 264.0764192 | 261.0718824 |
| 264.338232 | 264.3388688 | 264.3410528 | 264.317136 | 264.3045264 | 264.0764192 | 261.0738824 |
| 264.340232 | 264.3388688 | 264.3420528 | 264.319136 | 264.3055264 | 264.0784192 | 261.0748824 |
| 264.337232 | 264.3408688 | 264.3420528 | 264.320136 | 264.3055264 | 264.0734192 | 261.0718824 |
| 264.337232 | 264.3388688 | 264.3420528 | 264.319136 | 264.3055264 | 264.0774192 | 261.0728824 |
| 264.337232 | 264.3378688 | 264.3410528 | 264.319136 | 264.3045264 | 264.0754192 | 261.0718824 |
| 264.334232 | 264.3358688 | 264.3410528 | 264.316136 | 264.3045264 | 264.0744192 | 261.0708824 |
| 264.338232 | 264.3368688 | 264.3450528 | 264.318136 | 264.3055264 | 264.0764192 | 261.0748824 |
| 264.337232 | 264.3358688 | 264.3410528 | 264.317136 | 264.3065264 | 264.0754192 | 261.0698824 |
| 264.338232 | 264.3368688 | 264.3420528 | 264.318136 | 264.3035264 | 264.0744192 | 261.0728824 |
| 264.336232 | 264.3368688 | 264.3400528 | 264.317136 | 264.3035264 | 264.0744192 | 261.0708824 |
| 264.336232 | 264.3358688 | 264.3410528 | 264.318136 | 264.3035264 | 264.0764192 | 261.0748824 |
| 264.336232 | 264.3358688 | 264.3390528 | 264.316136 | 264.3045264 | 264.0744192 | 261.0708824 |
| 264.337232 | 264.3368688 | 264.3420528 | 264.317136 | 264.3055264 | 264.0754192 | 261.0708824 |
| 264.337232 | 264.3358688 | 264.3400528 | 264.316136 | 264.3035264 | 264.0754192 | 261.0718824 |
| 264.334232 | 264.3358688 | 264.3400528 | 264.316136 | 264.3015264 | 264.0744192 | 261.0698824 |
| 264.337232 | 264.3368688 | 264.3410528 | 264.318136 | 264.3025264 | 264.0714192 | 261.0718824 |
| 264.335232 | 264.3368688 | 264.3400528 | 264.317136 | 264.3025264 | 264.0754192 | 261.0708824 |
| 264.336232 | 264.3368688 | 264.3400528 | 264.317136 | 264.3015264 | 264.0764192 | 261.0698824 |
| 264.335232 | 264.3388688 | 264.3420528 | 264.316136 | 264.3045264 | 264.0774192 | 261.0728824 |
| 264.336232 | 264.3378688 | 264.3390528 | 264.317136 | 264.3035264 | 264.0744192 | 261.0718824 |
| 264.335232 | 264.3368688 | 264.3410528 | 264.317136 | 264.3025264 | 264.0794192 | 261.0698824 |

|            |             |             |            |             |             |             |
|------------|-------------|-------------|------------|-------------|-------------|-------------|
| 264.337232 | 264.3388688 | 264.3410528 | 264.318136 | 264.3045264 | 264.0794192 | 261.0728824 |
| 264.337232 | 264.3398688 | 264.3400528 | 264.318136 | 264.3045264 | 264.0764192 | 261.0708824 |
| 264.338232 | 264.3388688 | 264.3400528 | 264.319136 | 264.3035264 | 264.0774192 | 261.0738824 |
| 264.337232 | 264.3378688 | 264.3410528 | 264.319136 | 264.3065264 | 264.0794192 | 261.0738824 |
| 264.340232 | 264.3408688 | 264.3420528 | 264.320136 | 264.3065264 | 264.0804192 | 261.0728824 |
| 264.339232 | 264.3388688 | 264.3400528 | 264.318136 | 264.3045264 | 264.0764192 | 261.0718824 |
| 264.339232 | 264.3408688 | 264.3390528 | 264.319136 | 264.3055264 | 264.0754192 | 261.0728824 |
| 264.338232 | 264.3388688 | 264.3390528 | 264.318136 | 264.3045264 | 264.0754192 | 261.0728824 |
| 264.337232 | 264.3378688 | 264.3430528 | 264.320136 | 264.3055264 | 264.0814192 | 261.0718824 |
| 264.339232 | 264.3378688 | 264.3410528 | 264.319136 | 264.3035264 | 264.0774192 | 261.0738824 |
| 264.337232 | 264.3398688 | 264.3410528 | 264.319136 | 264.3055264 | 264.0754192 | 261.0718824 |
| 264.339232 | 264.3398688 | 264.3410528 | 264.320136 | 264.3035264 | 264.0784192 | 261.0718824 |
| 264.337232 | 264.3378688 | 264.3410528 | 264.319136 | 264.3035264 | 264.0734192 | 261.0698824 |
| 264.338232 | 264.3388688 | 264.3420528 | 264.320136 | 264.3045264 | 264.0784192 | 261.0728824 |
| 264.339232 | 264.3408688 | 264.3450528 | 264.321136 | 264.3065264 | 264.0814192 | 261.0758824 |
| 264.337232 | 264.3378688 | 264.3420528 | 264.321136 | 264.3045264 | 264.0794192 | 261.0708824 |
| 264.336232 | 264.3378688 | 264.3400528 | 264.318136 | 264.3025264 | 264.0764192 | 261.0708824 |
| 264.337232 | 264.3358688 | 264.3380528 | 264.318136 | 264.3025264 | 264.0754192 | 261.0688824 |
| 264.339232 | 264.3388688 | 264.3390528 | 264.319136 | 264.3045264 | 264.0804192 | 261.0718824 |
| 264.336232 | 264.3378688 | 264.3380528 | 264.318136 | 264.3025264 | 264.0774192 | 261.0688824 |
| 264.338232 | 264.3388688 | 264.3410528 | 264.319136 | 264.3055264 | 264.0764192 | 261.0718824 |
| 264.337232 | 264.3368688 | 264.3370528 | 264.319136 | 264.3025264 | 264.0734192 | 261.0708824 |
| 264.338232 | 264.3388688 | 264.3400528 | 264.320136 | 264.3065264 | 264.0764192 | 261.0738824 |
| 264.334232 | 264.3358688 | 264.3400528 | 264.317136 | 264.3035264 | 264.0744192 | 261.0718824 |
| 264.337232 | 264.3368688 | 264.3420528 | 264.318136 | 264.3045264 | 264.0744192 | 261.0718824 |
| 264.337232 | 264.3368688 | 264.3400528 | 264.318136 | 264.3045264 | 264.0764192 | 261.0698824 |
| 264.338232 | 264.3358688 | 264.3390528 | 264.317136 | 264.3035264 | 264.0764192 | 261.0698824 |
| 264.337232 | 264.3378688 | 264.3400528 | 264.320136 | 264.3045264 | 264.0764192 | 261.0718824 |
| 264.337232 | 264.3378688 | 264.3410528 | 264.319136 | 264.3065264 | 264.0754192 | 261.0728824 |
| 264.338232 | 264.3378688 | 264.3420528 | 264.321136 | 264.3055264 | 264.0784192 | 261.0738824 |
| 264.338232 | 264.3398688 | 264.3390528 | 264.319136 | 264.3055264 | 264.0754192 | 261.0728824 |
| 264.337232 | 264.3378688 | 264.3430528 | 264.319136 | 264.3065264 | 264.0754192 | 261.0728824 |
| 264.337232 | 264.3348688 | 264.3380528 | 264.318136 | 264.3045264 | 264.0764192 | 261.0718824 |
| 264.336232 | 264.3368688 | 264.3370528 | 264.318136 | 264.3035264 | 264.0764192 | 261.0718824 |
| 264.337232 | 264.3378688 | 264.3400528 | 264.318136 | 264.3045264 | 264.0744192 | 261.0698824 |
| 264.336232 | 264.3348688 | 264.3400528 | 264.318136 | 264.3035264 | 264.0764192 | 261.0698824 |
| 264.336232 | 264.3368688 | 264.3400528 | 264.320136 | 264.3065264 | 264.0774192 | 261.0718824 |
| 264.337232 | 264.3358688 | 264.3410528 | 264.319136 | 264.3055264 | 264.0784192 | 261.0698824 |
| 264.335232 | 264.3358688 | 264.3410528 | 264.319136 | 264.3055264 | 264.0734192 | 261.0708824 |
| 264.336232 | 264.3378688 | 264.3420528 | 264.317136 | 264.3065264 | 264.0754192 | 261.0708824 |
| 264.336232 | 264.3358688 | 264.3400528 | 264.318136 | 264.3065264 | 264.0724192 | 261.0698824 |
| 264.336232 | 264.3358688 | 264.3400528 | 264.316136 | 264.3025264 | 264.0764192 | 261.0698824 |
| 264.336232 | 264.3358688 | 264.3380528 | 264.318136 | 264.3045264 | 264.0744192 | 261.0698824 |
| 264.336232 | 264.3358688 | 264.3380528 | 264.317136 | 264.3065264 | 264.0744192 | 261.0708824 |
| 264.334232 | 264.3348688 | 264.3370528 | 264.316136 | 264.3045264 | 264.0744192 | 261.0708824 |
| 264.336232 | 264.3338688 | 264.3400528 | 264.317136 | 264.3045264 | 264.0754192 | 261.0688824 |
| 264.337232 | 264.3358688 | 264.3390528 | 264.316136 | 264.3055264 | 264.0774192 | 261.0718824 |

|            |             |             |            |             |             |             |
|------------|-------------|-------------|------------|-------------|-------------|-------------|
| 264.338232 | 264.3368688 | 264.3390528 | 264.319136 | 264.3055264 | 264.0764192 | 261.0718824 |
| 264.335232 | 264.3358688 | 264.3370528 | 264.317136 | 264.3035264 | 264.0744192 | 261.0718824 |
| 264.337232 | 264.3338688 | 264.3370528 | 264.316136 | 264.3035264 | 264.0754192 | 261.0688824 |
| 264.339232 | 264.3358688 | 264.3390528 | 264.317136 | 264.3045264 | 264.0764192 | 261.0698824 |
| 264.337232 | 264.3348688 | 264.3380528 | 264.317136 | 264.3045264 | 264.0744192 | 261.0678824 |
| 264.337232 | 264.3368688 | 264.3400528 | 264.316136 | 264.3065264 | 264.0774192 | 261.0678824 |
| 264.336232 | 264.3368688 | 264.3390528 | 264.318136 | 264.3045264 | 264.0764192 | 261.0708824 |
| 264.333232 | 264.3338688 | 264.3360528 | 264.315136 | 264.2995264 | 264.0734192 | 261.0648824 |
| 264.338232 | 264.3358688 | 264.3390528 | 264.319136 | 264.3055264 | 264.0774192 | 261.0688824 |
| 264.336232 | 264.3328688 | 264.3400528 | 264.319136 | 264.3015264 | 264.0744192 | 261.0678824 |
| 264.336232 | 264.3328688 | 264.3390528 | 264.317136 | 264.3015264 | 264.0744192 | 261.0688824 |
| 264.336232 | 264.3348688 | 264.3390528 | 264.316136 | 264.3015264 | 264.0744192 | 261.0678824 |
| 264.338232 | 264.3358688 | 264.3390528 | 264.319136 | 264.3035264 | 264.0764192 | 261.0678824 |
| 264.339232 | 264.3358688 | 264.3400528 | 264.317136 | 264.3035264 | 264.0754192 | 261.0708824 |
| 264.337232 | 264.3358688 | 264.3380528 | 264.318136 | 264.3025264 | 264.0774192 | 261.0698824 |
| 264.337232 | 264.3328688 | 264.3400528 | 264.318136 | 264.3025264 | 264.0774192 | 261.0718824 |
| 264.337232 | 264.3338688 | 264.3380528 | 264.318136 | 264.3015264 | 264.0784192 | 261.0698824 |
| 264.338232 | 264.3358688 | 264.3370528 | 264.318136 | 264.3025264 | 264.0764192 | 261.0718824 |
| 264.336232 | 264.3338688 | 264.3370528 | 264.315136 | 264.3005264 | 264.0764192 | 261.0698824 |
| 264.334232 | 264.3338688 | 264.3370528 | 264.317136 | 264.3025264 | 264.0764192 | 261.0698824 |
| 264.337232 | 264.3348688 | 264.3400528 | 264.318136 | 264.3035264 | 264.0794192 | 261.0698824 |
| 264.336232 | 264.3348688 | 264.3380528 | 264.318136 | 264.3035264 | 264.0774192 | 261.0698824 |
| 264.337232 | 264.3348688 | 264.3420528 | 264.319136 | 264.3025264 | 264.0774192 | 261.0698824 |
| 264.336232 | 264.3358688 | 264.3410528 | 264.316136 | 264.3025264 | 264.0764192 | 261.0698824 |
| 264.336232 | 264.3338688 | 264.3390528 | 264.315136 | 264.3035264 | 264.0764192 | 261.0698824 |
| 264.337232 | 264.3338688 | 264.3380528 | 264.318136 | 264.3045264 | 264.0784192 | 261.0688824 |
| 264.336232 | 264.3368688 | 264.3410528 | 264.318136 | 264.3035264 | 264.0784192 | 261.0698824 |
| 264.336232 | 264.3358688 | 264.3360528 | 264.315136 | 264.3025264 | 264.0774192 | 261.0688824 |
| 264.335232 | 264.3338688 | 264.3380528 | 264.318136 | 264.3025264 | 264.0774192 | 261.0668824 |
| 264.337232 | 264.3358688 | 264.3400528 | 264.318136 | 264.3045264 | 264.0784192 | 261.0698824 |
| 264.335232 | 264.3358688 | 264.3390528 | 264.317136 | 264.3035264 | 264.0764192 | 261.0688824 |
| 264.338232 | 264.3358688 | 264.3390528 | 264.317136 | 264.3035264 | 264.0774192 | 261.0708824 |
| 264.338232 | 264.3358688 | 264.3370528 | 264.317136 | 264.3015264 | 264.0764192 | 261.0688824 |
| 264.337232 | 264.3358688 | 264.3400528 | 264.317136 | 264.3045264 | 264.0744192 | 261.0718824 |
| 264.335232 | 264.3348688 | 264.3370528 | 264.316136 | 264.3025264 | 264.0754192 | 261.0678824 |
| 264.336232 | 264.3348688 | 264.3370528 | 264.314136 | 264.3035264 | 264.0764192 | 261.0678824 |
| 264.336232 | 264.3348688 | 264.3390528 | 264.319136 | 264.3055264 | 264.0784192 | 261.0688824 |
| 264.338232 | 264.3348688 | 264.3370528 | 264.318136 | 264.3035264 | 264.0744192 | 261.0698824 |
| 264.339232 | 264.3358688 | 264.3390528 | 264.319136 | 264.3065264 | 264.0794192 | 261.0688824 |
| 264.337232 | 264.3338688 | 264.3360528 | 264.317136 | 264.3025264 | 264.0754192 | 261.0678824 |
| 264.338232 | 264.3368688 | 264.3400528 | 264.320136 | 264.3055264 | 264.0774192 | 261.0708824 |
| 264.340232 | 264.3398688 | 264.3390528 | 264.321136 | 264.3075264 | 264.0804192 | 261.0708824 |
| 264.337232 | 264.3368688 | 264.3380528 | 264.317136 | 264.3045264 | 264.0794192 | 261.0668824 |
| 264.339232 | 264.3368688 | 264.3380528 | 264.320136 | 264.3045264 | 264.0814192 | 261.0678824 |
| 264.340232 | 264.3398688 | 264.3400528 | 264.321136 | 264.3055264 | 264.0804192 | 261.0678824 |
| 264.339232 | 264.3368688 | 264.3360528 | 264.320136 | 264.3045264 | 264.0774192 | 261.0668824 |
| 264.337232 | 264.3368688 | 264.3380528 | 264.318136 | 264.3065264 | 264.0814192 | 261.0678824 |

|            |             |             |            |             |             |             |
|------------|-------------|-------------|------------|-------------|-------------|-------------|
| 264.339232 | 264.3368688 | 264.3380528 | 264.320136 | 264.3045264 | 264.0814192 | 261.0688824 |
| 264.339232 | 264.3388688 | 264.3380528 | 264.320136 | 264.3065264 | 264.0814192 | 261.0688824 |
| 264.338232 | 264.3368688 | 264.3370528 | 264.317136 | 264.3045264 | 264.0794192 | 261.0658824 |
| 264.341232 | 264.3368688 | 264.3380528 | 264.320136 | 264.3065264 | 264.0814192 | 261.0688824 |
| 264.339232 | 264.3368688 | 264.3370528 | 264.320136 | 264.3065264 | 264.0814192 | 261.0688824 |
| 264.338232 | 264.3368688 | 264.3390528 | 264.320136 | 264.3065264 | 264.0794192 | 261.0668824 |
| 264.339232 | 264.3388688 | 264.3400528 | 264.322136 | 264.3085264 | 264.0794192 | 261.0688824 |
| 264.341232 | 264.3388688 | 264.3400528 | 264.322136 | 264.3085264 | 264.0794192 | 261.0698824 |
| 264.339232 | 264.3368688 | 264.3390528 | 264.320136 | 264.3065264 | 264.0794192 | 261.0668824 |
| 264.341232 | 264.3368688 | 264.3400528 | 264.320136 | 264.3065264 | 264.0814192 | 261.0688824 |
| 264.338232 | 264.3358688 | 264.3360528 | 264.319136 | 264.3075264 | 264.0774192 | 261.0658824 |
| 264.340232 | 264.3378688 | 264.3390528 | 264.321136 | 264.3075264 | 264.0804192 | 261.0678824 |
| 264.339232 | 264.3358688 | 264.3380528 | 264.319136 | 264.3065264 | 264.0814192 | 261.0678824 |
| 264.337232 | 264.3358688 | 264.3380528 | 264.318136 | 264.3075264 | 264.0794192 | 261.0678824 |
| 264.337232 | 264.3378688 | 264.3380528 | 264.319136 | 264.3065264 | 264.0794192 | 261.0678824 |
| 264.339232 | 264.3368688 | 264.3370528 | 264.319136 | 264.3065264 | 264.0794192 | 261.0668824 |
| 264.339232 | 264.3388688 | 264.3380528 | 264.321136 | 264.3095264 | 264.0774192 | 261.0678824 |
| 264.338232 | 264.3368688 | 264.3370528 | 264.320136 | 264.3085264 | 264.0784192 | 261.0678824 |
| 264.341232 | 264.3378688 | 264.3390528 | 264.319136 | 264.3075264 | 264.0784192 | 261.0698824 |
| 264.339232 | 264.3378688 | 264.3390528 | 264.321136 | 264.3075264 | 264.0794192 | 261.0698824 |
| 264.341232 | 264.3378688 | 264.3390528 | 264.323136 | 264.3075264 | 264.0794192 | 261.0708824 |
| 264.341232 | 264.3378688 | 264.3390528 | 264.321136 | 264.3075264 | 264.0794192 | 261.0698824 |
| 264.341232 | 264.3398688 | 264.3400528 | 264.321136 | 264.3075264 | 264.0794192 | 261.0708824 |
| 264.340232 | 264.3378688 | 264.3390528 | 264.320136 | 264.3065264 | 264.0784192 | 261.0718824 |
| 264.336232 | 264.3368688 | 264.3370528 | 264.318136 | 264.3065264 | 264.0774192 | 261.0668824 |
| 264.339232 | 264.3398688 | 264.3400528 | 264.321136 | 264.3075264 | 264.0814192 | 261.0708824 |
| 264.339232 | 264.3398688 | 264.3400528 | 264.319136 | 264.3075264 | 264.0814192 | 261.0708824 |
| 264.338232 | 264.3378688 | 264.3390528 | 264.320136 | 264.3085264 | 264.0784192 | 261.0678824 |
| 264.341232 | 264.3398688 | 264.3400528 | 264.321136 | 264.3095264 | 264.0814192 | 261.0708824 |
| 264.338232 | 264.3368688 | 264.3370528 | 264.320136 | 264.3065264 | 264.0784192 | 261.0688824 |
| 264.340232 | 264.3378688 | 264.3390528 | 264.320136 | 264.3085264 | 264.0784192 | 261.0698824 |
| 264.340232 | 264.3398688 | 264.3410528 | 264.320136 | 264.3085264 | 264.0804192 | 261.0698824 |
| 264.341232 | 264.3398688 | 264.3410528 | 264.320136 | 264.3085264 | 264.0804192 | 261.0698824 |
| 264.340232 | 264.3398688 | 264.3390528 | 264.320136 | 264.3085264 | 264.0804192 | 261.0698824 |
| 264.338232 | 264.3368688 | 264.3370528 | 264.320136 | 264.3055264 | 264.0774192 | 261.0688824 |
| 264.340232 | 264.3398688 | 264.3390528 | 264.321136 | 264.3085264 | 264.0824192 | 261.0698824 |
| 264.340232 | 264.3398688 | 264.3410528 | 264.321136 | 264.3085264 | 264.0784192 | 261.0698824 |
| 264.341232 | 264.3408688 | 264.3400528 | 264.321136 | 264.3095264 | 264.0814192 | 261.0698824 |
| 264.341232 | 264.3398688 | 264.3400528 | 264.321136 | 264.3065264 | 264.0814192 | 261.0698824 |
| 264.341232 | 264.3408688 | 264.3400528 | 264.321136 | 264.3095264 | 264.0814192 | 261.0698824 |
| 264.341232 | 264.3408688 | 264.3400528 | 264.323136 | 264.3095264 | 264.0814192 | 261.0708824 |
| 264.342232 | 264.3408688 | 264.3410528 | 264.322136 | 264.3085264 | 264.0804192 | 261.0718824 |
| 264.339232 | 264.3398688 | 264.3400528 | 264.321136 | 264.3075264 | 264.0814192 | 261.0698824 |
| 264.340232 | 264.3378688 | 264.3390528 | 264.318136 | 264.3065264 | 264.0784192 | 261.0668824 |
| 264.336232 | 264.3378688 | 264.3370528 | 264.318136 | 264.3065264 | 264.0804192 | 261.0688824 |
| 264.340232 | 264.3388688 | 264.3390528 | 264.322136 | 264.3085264 | 264.0804192 | 261.0688824 |
| 264.339232 | 264.3398688 | 264.3400528 | 264.320136 | 264.3085264 | 264.0814192 | 261.0668824 |

|            |             |             |            |             |             |             |
|------------|-------------|-------------|------------|-------------|-------------|-------------|
| 264.340232 | 264.3398688 | 264.3390528 | 264.322136 | 264.3065264 | 264.0824192 | 261.0718824 |
| 264.340232 | 264.3398688 | 264.3410528 | 264.323136 | 264.3095264 | 264.0824192 | 261.0698824 |
| 264.338232 | 264.3398688 | 264.3390528 | 264.321136 | 264.3105264 | 264.0794192 | 261.0688824 |
| 264.339232 | 264.3388688 | 264.3360528 | 264.320136 | 264.3075264 | 264.0834192 | 261.0668824 |
| 264.340232 | 264.3398688 | 264.3390528 | 264.321136 | 264.3095264 | 264.0804192 | 261.0718824 |
| 264.338232 | 264.3398688 | 264.3410528 | 264.321136 | 264.3085264 | 264.0824192 | 261.0688824 |
| 264.338232 | 264.3378688 | 264.3410528 | 264.321136 | 264.3085264 | 264.0824192 | 261.0688824 |
| 264.339232 | 264.3398688 | 264.3400528 | 264.321136 | 264.3075264 | 264.0814192 | 261.0698824 |
| 264.339232 | 264.3398688 | 264.3400528 | 264.321136 | 264.3075264 | 264.0814192 | 261.0698824 |
| 264.339232 | 264.3408688 | 264.3410528 | 264.322136 | 264.3085264 | 264.0814192 | 261.0698824 |
| 264.340232 | 264.3388688 | 264.3400528 | 264.322136 | 264.3085264 | 264.0824192 | 261.0698824 |
| 264.339232 | 264.3378688 | 264.3400528 | 264.321136 | 264.3075264 | 264.0794192 | 261.0698824 |
| 264.338232 | 264.3378688 | 264.3390528 | 264.321136 | 264.3065264 | 264.0804192 | 261.0698824 |
| 264.336232 | 264.3348688 | 264.3370528 | 264.318136 | 264.3045264 | 264.0764192 | 261.0668824 |
| 264.338232 | 264.3378688 | 264.3390528 | 264.319136 | 264.3045264 | 264.0784192 | 261.0678824 |
| 264.338232 | 264.3368688 | 264.3390528 | 264.319136 | 264.3045264 | 264.0804192 | 261.0678824 |
| 264.338232 | 264.3378688 | 264.3400528 | 264.319136 | 264.3065264 | 264.0804192 | 261.0698824 |
| 264.338232 | 264.3378688 | 264.3370528 | 264.319136 | 264.3045264 | 264.0784192 | 261.0698824 |
| 264.336232 | 264.3378688 | 264.3390528 | 264.319136 | 264.3065264 | 264.0784192 | 261.0678824 |
| 264.338232 | 264.3398688 | 264.3370528 | 264.319136 | 264.3065264 | 264.0784192 | 261.0678824 |
| 264.339232 | 264.3398688 | 264.3390528 | 264.319136 | 264.3065264 | 264.0804192 | 261.0698824 |
| 264.338232 | 264.3388688 | 264.3390528 | 264.320136 | 264.3055264 | 264.0774192 | 261.0688824 |
| 264.337232 | 264.3388688 | 264.3380528 | 264.320136 | 264.3055264 | 264.0794192 | 261.0688824 |
| 264.336232 | 264.3358688 | 264.3360528 | 264.317136 | 264.3065264 | 264.0774192 | 261.0678824 |
| 264.338232 | 264.3378688 | 264.3390528 | 264.319136 | 264.3045264 | 264.0774192 | 261.0678824 |
| 264.339232 | 264.3358688 | 264.3380528 | 264.319136 | 264.3035264 | 264.0734192 | 261.0678824 |
| 264.337232 | 264.3378688 | 264.3400528 | 264.318136 | 264.3035264 | 264.0764192 | 261.0688824 |
| 264.338232 | 264.3378688 | 264.3380528 | 264.320136 | 264.3055264 | 264.0794192 | 261.0698824 |
| 264.336232 | 264.3378688 | 264.3390528 | 264.320136 | 264.3055264 | 264.0784192 | 261.0708824 |
| 264.335232 | 264.3368688 | 264.3380528 | 264.319136 | 264.3045264 | 264.0754192 | 261.0678824 |
| 264.336232 | 264.3358688 | 264.3390528 | 264.316136 | 264.3025264 | 264.0754192 | 261.0678824 |
| 264.335232 | 264.3358688 | 264.3370528 | 264.316136 | 264.3025264 | 264.0754192 | 261.0688824 |
| 264.337232 | 264.3358688 | 264.3370528 | 264.316136 | 264.3045264 | 264.0754192 | 261.0688824 |
| 264.337232 | 264.3378688 | 264.3390528 | 264.318136 | 264.3045264 | 264.0774192 | 261.0688824 |
| 264.337232 | 264.3368688 | 264.3380528 | 264.317136 | 264.3025264 | 264.0764192 | 261.0668824 |
| 264.337232 | 264.3378688 | 264.3400528 | 264.317136 | 264.3045264 | 264.0794192 | 261.0688824 |
| 264.338232 | 264.3368688 | 264.3380528 | 264.317136 | 264.3035264 | 264.0784192 | 261.0708824 |
| 264.338232 | 264.3368688 | 264.3370528 | 264.317136 | 264.3055264 | 264.0764192 | 261.0728824 |
| 264.337232 | 264.3368688 | 264.3390528 | 264.318136 | 264.3045264 | 264.0754192 | 261.0698824 |
| 264.338232 | 264.3358688 | 264.3410528 | 264.318136 | 264.3065264 | 264.0794192 | 261.0678824 |
| 264.337232 | 264.3358688 | 264.3390528 | 264.317136 | 264.3035264 | 264.0774192 | 261.0688824 |
| 264.335232 | 264.3348688 | 264.3370528 | 264.317136 | 264.3035264 | 264.0734192 | 261.0668824 |
| 264.337232 | 264.3358688 | 264.3370528 | 264.318136 | 264.3035264 | 264.0774192 | 261.0688824 |
| 264.338232 | 264.3368688 | 264.3360528 | 264.317136 | 264.3045264 | 264.0764192 | 261.0688824 |
| 264.337232 | 264.3368688 | 264.3370528 | 264.316136 | 264.3035264 | 264.0774192 | 261.0668824 |
| 264.334232 | 264.3368688 | 264.3360528 | 264.318136 | 264.3025264 | 264.0764192 | 261.0668824 |
| 264.336232 | 264.3358688 | 264.3380528 | 264.318136 | 264.3025264 | 264.0784192 | 261.0668824 |



|            |             |             |            |             |             |             |
|------------|-------------|-------------|------------|-------------|-------------|-------------|
| 264.333232 | 264.3358688 | 264.3370528 | 264.317136 | 264.3045264 | 264.0754192 | 261.0688824 |
| 264.337232 | 264.3378688 | 264.3390528 | 264.319136 | 264.3045264 | 264.0774192 | 261.0688824 |
| 264.335232 | 264.3368688 | 264.3390528 | 264.319136 | 264.3065264 | 264.0774192 | 261.0678824 |
| 264.336232 | 264.3368688 | 264.3390528 | 264.319136 | 264.3055264 | 264.0764192 | 261.0718824 |
| 264.338232 | 264.3368688 | 264.3390528 | 264.319136 | 264.3055264 | 264.0784192 | 261.0678824 |
| 264.336232 | 264.3348688 | 264.3380528 | 264.319136 | 264.3035264 | 264.0784192 | 261.0688824 |
| 264.338232 | 264.3368688 | 264.3380528 | 264.318136 | 264.3035264 | 264.0784192 | 261.0668824 |
| 264.334232 | 264.3348688 | 264.3360528 | 264.316136 | 264.3035264 | 264.0764192 | 261.0648824 |
| 264.339232 | 264.3378688 | 264.3390528 | 264.319136 | 264.3065264 | 264.0794192 | 261.0688824 |
| 264.339232 | 264.3358688 | 264.3390528 | 264.319136 | 264.3045264 | 264.0794192 | 261.0708824 |
| 264.339232 | 264.3358688 | 264.3390528 | 264.319136 | 264.3065264 | 264.0774192 | 261.0708824 |
| 264.335232 | 264.3368688 | 264.3390528 | 264.319136 | 264.3045264 | 264.0774192 | 261.0698824 |
| 264.337232 | 264.3368688 | 264.3390528 | 264.319136 | 264.3045264 | 264.0754192 | 261.0708824 |
| 264.339232 | 264.3398688 | 264.3400528 | 264.319136 | 264.3065264 | 264.0794192 | 261.0728824 |
| 264.337232 | 264.3378688 | 264.3390528 | 264.319136 | 264.3045264 | 264.0774192 | 261.0708824 |
| 264.337232 | 264.3358688 | 264.3370528 | 264.319136 | 264.3045264 | 264.0754192 | 261.0688824 |
| 264.336232 | 264.3358688 | 264.3380528 | 264.315136 | 264.3025264 | 264.0774192 | 261.0688824 |
| 264.338232 | 264.3368688 | 264.3380528 | 264.318136 | 264.3055264 | 264.0764192 | 261.0688824 |
| 264.336232 | 264.3358688 | 264.3400528 | 264.317136 | 264.3055264 | 264.0744192 | 261.0668824 |
| 264.338232 | 264.3358688 | 264.3360528 | 264.318136 | 264.3055264 | 264.0744192 | 261.0688824 |
| 264.335232 | 264.3358688 | 264.3370528 | 264.317136 | 264.3045264 | 264.0764192 | 261.0678824 |
| 264.338232 | 264.3388688 | 264.3380528 | 264.318136 | 264.3055264 | 264.0764192 | 261.0688824 |
| 264.336232 | 264.3358688 | 264.3380528 | 264.318136 | 264.3055264 | 264.0764192 | 261.0668824 |
| 264.337232 | 264.3368688 | 264.3390528 | 264.319136 | 264.3085264 | 264.0754192 | 261.0678824 |
| 264.337232 | 264.3368688 | 264.3380528 | 264.319136 | 264.3065264 | 264.0784192 | 261.0698824 |
| 264.334232 | 264.3358688 | 264.3380528 | 264.318136 | 264.3055264 | 264.0794192 | 261.0668824 |
| 264.338232 | 264.3368688 | 264.3380528 | 264.318136 | 264.3055264 | 264.0764192 | 261.0688824 |
| 264.336232 | 264.3358688 | 264.3370528 | 264.319136 | 264.3025264 | 264.0734192 | 261.0678824 |
| 264.338232 | 264.3358688 | 264.3380528 | 264.319136 | 264.3045264 | 264.0734192 | 261.0688824 |
| 264.337232 | 264.3358688 | 264.3370528 | 264.317136 | 264.3045264 | 264.0754192 | 261.0678824 |
| 264.335232 | 264.3358688 | 264.3370528 | 264.319136 | 264.3025264 | 264.0754192 | 261.0678824 |
| 264.337232 | 264.3338688 | 264.3350528 | 264.317136 | 264.3045264 | 264.0734192 | 261.0658824 |
| 264.338232 | 264.3358688 | 264.3380528 | 264.317136 | 264.3055264 | 264.0804192 | 261.0658824 |
| 264.337232 | 264.3378688 | 264.3380528 | 264.319136 | 264.3045264 | 264.0754192 | 261.0678824 |
| 264.335232 | 264.3378688 | 264.3390528 | 264.317136 | 264.3045264 | 264.0744192 | 261.0658824 |
| 264.337232 | 264.3358688 | 264.3390528 | 264.319136 | 264.3035264 | 264.0754192 | 261.0658824 |
| 264.335232 | 264.3378688 | 264.3390528 | 264.319136 | 264.3035264 | 264.0774192 | 261.0678824 |
| 264.336232 | 264.3348688 | 264.3370528 | 264.318136 | 264.3055264 | 264.0744192 | 261.0648824 |
| 264.336232 | 264.3368688 | 264.3380528 | 264.318136 | 264.3055264 | 264.0764192 | 261.0678824 |
| 264.337232 | 264.3368688 | 264.3390528 | 264.319136 | 264.3045264 | 264.0774192 | 261.0668824 |
| 264.337232 | 264.3368688 | 264.3370528 | 264.319136 | 264.3065264 | 264.0774192 | 261.0668824 |
| 264.337232 | 264.3368688 | 264.3390528 | 264.319136 | 264.3045264 | 264.0774192 | 261.0658824 |
| 264.335232 | 264.3368688 | 264.3390528 | 264.320136 | 264.3045264 | 264.0794192 | 261.0688824 |
| 264.336232 | 264.3368688 | 264.3390528 | 264.319136 | 264.3065264 | 264.0764192 | 261.0678824 |
| 264.336232 | 264.3388688 | 264.3370528 | 264.319136 | 264.3085264 | 264.0764192 | 261.0688824 |
| 264.336232 | 264.3358688 | 264.3360528 | 264.319136 | 264.3055264 | 264.0774192 | 261.0678824 |
| 264.338232 | 264.3358688 | 264.3380528 | 264.318136 | 264.3055264 | 264.0754192 | 261.0678824 |

|            |             |             |            |             |             |             |
|------------|-------------|-------------|------------|-------------|-------------|-------------|
| 264.335232 | 264.3378688 | 264.3370528 | 264.318136 | 264.3045264 | 264.0764192 | 261.0698824 |
| 264.336232 | 264.3368688 | 264.3370528 | 264.318136 | 264.3025264 | 264.0764192 | 261.0668824 |
| 264.336232 | 264.3368688 | 264.3370528 | 264.318136 | 264.3045264 | 264.0784192 | 261.0688824 |
| 264.336232 | 264.3368688 | 264.3370528 | 264.320136 | 264.3065264 | 264.0804192 | 261.0668824 |
| 264.336232 | 264.3368688 | 264.3370528 | 264.318136 | 264.3045264 | 264.0764192 | 261.0668824 |
| 264.336232 | 264.3368688 | 264.3370528 | 264.320136 | 264.3045264 | 264.0764192 | 261.0668824 |
| 264.338232 | 264.3368688 | 264.3370528 | 264.320136 | 264.3065264 | 264.0764192 | 261.0688824 |
| 264.334232 | 264.3368688 | 264.3380528 | 264.318136 | 264.3045264 | 264.0764192 | 261.0688824 |
| 264.338232 | 264.3378688 | 264.3390528 | 264.320136 | 264.3065264 | 264.0784192 | 261.0688824 |
| 264.338232 | 264.3368688 | 264.3380528 | 264.319136 | 264.3035264 | 264.0774192 | 261.0678824 |
| 264.337232 | 264.3388688 | 264.3370528 | 264.319136 | 264.3055264 | 264.0754192 | 261.0678824 |
| 264.337232 | 264.3388688 | 264.3370528 | 264.319136 | 264.3055264 | 264.0794192 | 261.0688824 |
| 264.336232 | 264.3358688 | 264.3370528 | 264.318136 | 264.3045264 | 264.0784192 | 261.0678824 |
| 264.337232 | 264.3368688 | 264.3390528 | 264.316136 | 264.3045264 | 264.0764192 | 261.0698824 |
| 264.335232 | 264.3358688 | 264.3380528 | 264.316136 | 264.3035264 | 264.0784192 | 261.0688824 |
| 264.336232 | 264.3378688 | 264.3380528 | 264.318136 | 264.3045264 | 264.0774192 | 261.0698824 |
| 264.336232 | 264.3378688 | 264.3370528 | 264.321136 | 264.3045264 | 264.0804192 | 261.0718824 |
| 264.338232 | 264.3358688 | 264.3360528 | 264.318136 | 264.3035264 | 264.0784192 | 261.0698824 |
| 264.337232 | 264.3358688 | 264.3350528 | 264.317136 | 264.3035264 | 264.0774192 | 261.0668824 |
| 264.338232 | 264.3358688 | 264.3360528 | 264.318136 | 264.3045264 | 264.0784192 | 261.0688824 |
| 264.338232 | 264.3358688 | 264.3360528 | 264.320136 | 264.3045264 | 264.0784192 | 261.0688824 |
| 264.335232 | 264.3348688 | 264.3360528 | 264.317136 | 264.3015264 | 264.0754192 | 261.0688824 |
| 264.338232 | 264.3378688 | 264.3380528 | 264.318136 | 264.3065264 | 264.0784192 | 261.0698824 |
| 264.337232 | 264.3358688 | 264.3360528 | 264.318136 | 264.3035264 | 264.0774192 | 261.0698824 |
| 264.337232 | 264.3358688 | 264.3350528 | 264.318136 | 264.3035264 | 264.0744192 | 261.0668824 |
| 264.337232 | 264.3378688 | 264.3370528 | 264.320136 | 264.3035264 | 264.0814192 | 261.0688824 |
| 264.335232 | 264.3358688 | 264.3370528 | 264.318136 | 264.3055264 | 264.0794192 | 261.0688824 |
| 264.339232 | 264.3388688 | 264.3380528 | 264.319136 | 264.3065264 | 264.0794192 | 261.0698824 |
| 264.337232 | 264.3378688 | 264.3370528 | 264.318136 | 264.3055264 | 264.0794192 | 261.0688824 |
| 264.339232 | 264.3388688 | 264.3400528 | 264.321136 | 264.3065264 | 264.0774192 | 261.0698824 |
| 264.337232 | 264.3378688 | 264.3390528 | 264.320136 | 264.3055264 | 264.0794192 | 261.0688824 |
| 264.334232 | 264.3378688 | 264.3370528 | 264.318136 | 264.3055264 | 264.0804192 | 261.0668824 |
| 264.338232 | 264.3378688 | 264.3390528 | 264.320136 | 264.3055264 | 264.0784192 | 261.0668824 |
| 264.336232 | 264.3348688 | 264.3360528 | 264.317136 | 264.3045264 | 264.0764192 | 261.0678824 |
| 264.336232 | 264.3368688 | 264.3370528 | 264.318136 | 264.3045264 | 264.0754192 | 261.0678824 |
| 264.336232 | 264.3368688 | 264.3380528 | 264.319136 | 264.3045264 | 264.0804192 | 261.0678824 |
| 264.336232 | 264.3388688 | 264.3380528 | 264.319136 | 264.3055264 | 264.0784192 | 261.0678824 |
| 264.335232 | 264.3358688 | 264.3380528 | 264.317136 | 264.3045264 | 264.0794192 | 261.0668824 |
| 264.338232 | 264.3388688 | 264.3380528 | 264.319136 | 264.3045264 | 264.0784192 | 261.0678824 |
| 264.336232 | 264.3368688 | 264.3360528 | 264.317136 | 264.3045264 | 264.0774192 | 261.0678824 |
| 264.336232 | 264.3368688 | 264.3380528 | 264.319136 | 264.3045264 | 264.0774192 | 261.0678824 |
| 264.336232 | 264.3388688 | 264.3390528 | 264.317136 | 264.3025264 | 264.0804192 | 261.0698824 |
| 264.336232 | 264.3368688 | 264.3390528 | 264.317136 | 264.3045264 | 264.0774192 | 261.0698824 |
| 264.336232 | 264.3388688 | 264.3390528 | 264.319136 | 264.3045264 | 264.0784192 | 261.0678824 |
| 264.335232 | 264.3358688 | 264.3350528 | 264.314136 | 264.3015264 | 264.0764192 | 261.0668824 |
| 264.334232 | 264.3368688 | 264.3370528 | 264.316136 | 264.3035264 | 264.0764192 | 261.0668824 |
| 264.335232 | 264.3358688 | 264.3360528 | 264.316136 | 264.3045264 | 264.0754192 | 261.0668824 |

|            |             |             |            |             |             |             |
|------------|-------------|-------------|------------|-------------|-------------|-------------|
| 264.334232 | 264.3338688 | 264.3370528 | 264.316136 | 264.3015264 | 264.0764192 | 261.0648824 |
| 264.334232 | 264.3358688 | 264.3370528 | 264.316136 | 264.3015264 | 264.0774192 | 261.0668824 |
| 264.334232 | 264.3358688 | 264.3380528 | 264.318136 | 264.3045264 | 264.0774192 | 261.0678824 |
| 264.334232 | 264.3358688 | 264.3390528 | 264.316136 | 264.3015264 | 264.0784192 | 261.0668824 |
| 264.336232 | 264.3378688 | 264.3370528 | 264.316136 | 264.3035264 | 264.0744192 | 261.0668824 |
| 264.333232 | 264.3358688 | 264.3360528 | 264.315136 | 264.3025264 | 264.0784192 | 261.0658824 |
| 264.334232 | 264.3358688 | 264.3370528 | 264.316136 | 264.3015264 | 264.0784192 | 261.0668824 |
| 264.334232 | 264.3378688 | 264.3370528 | 264.316136 | 264.3035264 | 264.0784192 | 261.0668824 |
| 264.333232 | 264.3348688 | 264.3360528 | 264.315136 | 264.3025264 | 264.0754192 | 261.0668824 |
| 264.334232 | 264.3358688 | 264.3370528 | 264.316136 | 264.3025264 | 264.0784192 | 261.0668824 |
| 264.332232 | 264.3358688 | 264.3370528 | 264.316136 | 264.3035264 | 264.0764192 | 261.0668824 |
| 264.332232 | 264.3338688 | 264.3370528 | 264.315136 | 264.3035264 | 264.0784192 | 261.0648824 |
| 264.332232 | 264.3338688 | 264.3350528 | 264.316136 | 264.3035264 | 264.0744192 | 261.0648824 |
| 264.334232 | 264.3358688 | 264.3370528 | 264.316136 | 264.3045264 | 264.0744192 | 261.0668824 |
| 264.333232 | 264.3358688 | 264.3360528 | 264.317136 | 264.3045264 | 264.0794192 | 261.0678824 |
| 264.334232 | 264.3328688 | 264.3340528 | 264.315136 | 264.3015264 | 264.0724192 | 261.0648824 |
| 264.334232 | 264.3358688 | 264.3350528 | 264.316136 | 264.3035264 | 264.0764192 | 261.0668824 |
| 264.335232 | 264.3338688 | 264.3370528 | 264.316136 | 264.3035264 | 264.0744192 | 261.0668824 |
| 264.334232 | 264.3358688 | 264.3370528 | 264.315136 | 264.3035264 | 264.0744192 | 261.0648824 |
| 264.333232 | 264.3358688 | 264.3370528 | 264.316136 | 264.3025264 | 264.0764192 | 261.0658824 |
| 264.334232 | 264.3358688 | 264.3370528 | 264.316136 | 264.3025264 | 264.0764192 | 261.0658824 |
| 264.334232 | 264.3348688 | 264.3370528 | 264.316136 | 264.3035264 | 264.0804192 | 261.0668824 |
| 264.334232 | 264.3358688 | 264.3370528 | 264.318136 | 264.3035264 | 264.0784192 | 261.0668824 |
| 264.335232 | 264.3348688 | 264.3380528 | 264.317136 | 264.3025264 | 264.0804192 | 261.0658824 |
| 264.335232 | 264.3358688 | 264.3390528 | 264.317136 | 264.3025264 | 264.0794192 | 261.0658824 |
| 264.333232 | 264.3348688 | 264.3390528 | 264.318136 | 264.3045264 | 264.0774192 | 261.0668824 |
| 264.335232 | 264.3358688 | 264.3380528 | 264.317136 | 264.3025264 | 264.0774192 | 261.0658824 |
| 264.335232 | 264.3358688 | 264.3380528 | 264.317136 | 264.3025264 | 264.0804192 | 261.0668824 |
| 264.335232 | 264.3358688 | 264.3380528 | 264.315136 | 264.3025264 | 264.0774192 | 261.0668824 |
| 264.335232 | 264.3368688 | 264.3360528 | 264.315136 | 264.3025264 | 264.0774192 | 261.0658824 |
| 264.337232 | 264.3358688 | 264.3390528 | 264.318136 | 264.3055264 | 264.0794192 | 261.0688824 |
| 264.335232 | 264.3358688 | 264.3380528 | 264.318136 | 264.3055264 | 264.0804192 | 261.0668824 |
| 264.333232 | 264.3348688 | 264.3360528 | 264.317136 | 264.3025264 | 264.0774192 | 261.0658824 |
| 264.334232 | 264.3348688 | 264.3370528 | 264.315136 | 264.3025264 | 264.0764192 | 261.0658824 |
| 264.334232 | 264.3348688 | 264.3350528 | 264.317136 | 264.3015264 | 264.0764192 | 261.0658824 |
| 264.332232 | 264.3338688 | 264.3350528 | 264.315136 | 264.2995264 | 264.0744192 | 261.06      |

|            |             |             |            |             |             |             |
|------------|-------------|-------------|------------|-------------|-------------|-------------|
| 264.331232 | 264.3358688 | 264.3360528 | 264.316136 | 264.3035264 | 264.0764192 | 261.0648824 |
| 264.332232 | 264.3348688 | 264.3350528 | 264.317136 | 264.3015264 | 264.0744192 | 261.0648824 |
| 264.334232 | 264.3348688 | 264.3350528 | 264.314136 | 264.3005264 | 264.0774192 | 261.0648824 |
| 264.331232 | 264.3338688 | 264.3340528 | 264.314136 | 264.3005264 | 264.0734192 | 261.0618824 |
| 264.331232 | 264.3338688 | 264.3360528 | 264.316136 | 264.3015264 | 264.0764192 | 261.0668824 |
| 264.334232 | 264.3348688 | 264.3370528 | 264.315136 | 264.3005264 | 264.0774192 | 261.0648824 |
| 264.330232 | 264.3348688 | 264.3330528 | 264.314136 | 264.3005264 | 264.0704192 | 261.0628824 |
| 264.333232 | 264.3328688 | 264.3340528 | 264.313136 | 264.3005264 | 264.0774192 | 261.0628824 |
| 264.332232 | 264.3338688 | 264.3350528 | 264.316136 | 264.3035264 | 264.0764192 | 261.0618824 |
| 264.333232 | 264.3358688 | 264.3350528 | 264.316136 | 264.3025264 | 264.0774192 | 261.0638824 |
| 264.331232 | 264.3338688 | 264.3330528 | 264.316136 | 264.3025264 | 264.0754192 | 261.0628824 |
| 264.332232 | 264.3338688 | 264.3340528 | 264.315136 | 264.3035264 | 264.0744192 | 261.0608824 |
| 264.334232 | 264.3348688 | 264.3350528 | 264.315136 | 264.3035264 | 264.0744192 | 261.0628824 |
| 264.332232 | 264.3368688 | 264.3350528 | 264.315136 | 264.3035264 | 264.0774192 | 261.0638824 |
| 264.332232 | 264.3348688 | 264.3330528 | 264.313136 | 264.3015264 | 264.0744192 | 261.0608824 |
| 264.332232 | 264.3338688 | 264.3330528 | 264.313136 | 264.2995264 | 264.0764192 | 261.0598824 |
| 264.333232 | 264.3338688 | 264.3340528 | 264.314136 | 264.3005264 | 264.0774192 | 261.0598824 |
| 264.333232 | 264.3348688 | 264.3340528 | 264.315136 | 264.3005264 | 264.0774192 | 261.0618824 |
| 264.334232 | 264.3368688 | 264.3340528 | 264.317136 | 264.3045264 | 264.0784192 | 261.0618824 |
| 264.334232 | 264.3348688 | 264.3340528 | 264.315136 | 264.3025264 | 264.0724192 | 261.0618824 |
| 264.334232 | 264.3348688 | 264.3340528 | 264.315136 | 264.3025264 | 264.0744192 | 261.0618824 |
| 264.333232 | 264.3358688 | 264.3360528 | 264.317136 | 264.3015264 | 264.0774192 | 261.0638824 |
| 264.333232 | 264.3358688 | 264.3350528 | 264.317136 | 264.3045264 | 264.0794192 | 261.0638824 |
| 264.334232 | 264.3358688 | 264.3360528 | 264.318136 | 264.3035264 | 264.0784192 | 261.0658824 |
| 264.335232 | 264.3368688 | 264.3370528 | 264.314136 | 264.3025264 | 264.0774192 | 261.0648824 |
| 264.333232 | 264.3348688 | 264.3350528 | 264.316136 | 264.3025264 | 264.0744192 | 261.0648824 |
| 264.335232 | 264.3348688 | 264.3370528 | 264.317136 | 264.3035264 | 264.0784192 | 261.0648824 |
| 264.335232 | 264.3368688 | 264.3390528 | 264.318136 | 264.3045264 | 264.0774192 | 261.0668824 |
| 264.335232 | 264.3368688 | 264.3350528 | 264.318136 | 264.3025264 | 264.0784192 | 261.0638824 |
| 264.333232 | 264.3338688 | 264.3330528 | 264.314136 | 264.2985264 | 264.0754192 | 261.0638824 |
| 264.335232 | 264.3378688 | 264.3370528 | 264.318136 | 264.3025264 | 264.0784192 | 261.0658824 |
| 264.334232 | 264.3378688 | 264.3340528 | 264.316136 | 264.3025264 | 264.0814192 | 261.0658824 |
| 264.334232 | 264.3358688 | 264.3350528 | 264.320136 | 264.3025264 | 264.0784192 | 261.0658824 |
| 264.333232 | 264.3368688 | 264.3340528 | 264.315136 | 264.3035264 | 264.0754192 | 261.0648824 |
| 264.331232 | 264.3318688 | 264.3320528 | 264.314136 | 264.2985264 | 264.0724192 | 261.0618824 |
| 264.333232 | 264.3338688 | 264.3340528 | 264.316136 | 264.3005264 | 264.0814192 | 261.0638824 |
| 264.334232 | 264.3338688 | 264.3350528 | 264.316136 | 264.3015264 | 264.0774192 | 261.0628824 |
| 264.334232 | 264.3358688 | 264.3330528 | 264.315136 | 264.3015264 | 264.0774192 | 261.0628824 |
| 264.335232 | 264.3368688 | 264.3340528 | 264.317136 | 264.3025264 | 264.0794192 | 261.0628824 |
| 264.335232 | 264.3348688 | 264.3340528 | 264.316136 | 264.3025264 | 264.0774192 | 261.0638824 |
| 264.337232 | 264.3368688 | 264.3340528 | 264.316136 | 264.3035264 | 264.0814192 | 261.0638824 |
| 264.334232 | 264.3358688 | 264.3370528 | 264.316136 | 264.3035264 | 264.0764192 | 261.0658824 |
| 264.332232 | 264.3358688 | 264.3330528 | 264.314136 | 264.3035264 | 264.0764192 | 261.0618824 |
| 264.335232 | 264.3358688 | 264.3380528 | 264.315136 | 264.3045264 | 264.0774192 | 261.0648824 |
| 264.333232 | 264.3338688 | 264.3340528 | 264.315136 | 264.3005264 | 264.0754192 | 261.0618824 |
| 264.333232 | 264.3358688 | 264.3340528 | 264.315136 | 264.3025264 | 264.0774192 | 261.0628824 |
| 264.333232 | 264.3338688 | 264.3340528 | 264.314136 | 264.3005264 | 264.0754192 | 261.0628824 |

|            |             |             |            |             |             |             |
|------------|-------------|-------------|------------|-------------|-------------|-------------|
| 264.334232 | 264.3328688 | 264.3340528 | 264.315136 | 264.3005264 | 264.0784192 | 261.0608824 |
| 264.334232 | 264.3328688 | 264.3310528 | 264.314136 | 264.3005264 | 264.0754192 | 261.0618824 |
| 264.336232 | 264.3358688 | 264.3370528 | 264.316136 | 264.3035264 | 264.0784192 | 261.0638824 |
| 264.334232 | 264.3338688 | 264.3330528 | 264.313136 | 264.3015264 | 264.0764192 | 261.0628824 |
| 264.334232 | 264.3348688 | 264.3340528 | 264.316136 | 264.3025264 | 264.0784192 | 261.0618824 |
| 264.332232 | 264.3348688 | 264.3320528 | 264.314136 | 264.3005264 | 264.0744192 | 261.0618824 |
| 264.332232 | 264.3358688 | 264.3350528 | 264.314136 | 264.3025264 | 264.0804192 | 261.0618824 |
| 264.333232 | 264.3338688 | 264.3360528 | 264.317136 | 264.3035264 | 264.0794192 | 261.0628824 |
| 264.334232 | 264.3358688 | 264.3350528 | 264.316136 | 264.3045264 | 264.0764192 | 261.0638824 |
| 264.333232 | 264.3348688 | 264.3350528 | 264.316136 | 264.3015264 | 264.0764192 | 261.0648824 |
| 264.334232 | 264.3348688 | 264.3360528 | 264.317136 | 264.3045264 | 264.0784192 | 261.0628824 |
| 264.334232 | 264.3358688 | 264.3360528 | 264.316136 | 264.3035264 | 264.0794192 | 261.0618824 |
| 264.336232 | 264.3378688 | 264.3370528 | 264.317136 | 264.3045264 | 264.0804192 | 261.0658824 |
| 264.334232 | 264.3348688 | 264.3340528 | 264.315136 | 264.3025264 | 264.0754192 | 261.0648824 |
| 264.335232 | 264.3338688 | 264.3370528 | 264.316136 | 264.3035264 | 264.0794192 | 261.0658824 |
| 264.336232 | 264.3348688 | 264.3360528 | 264.317136 | 264.3045264 | 264.0744192 | 261.0658824 |
| 264.335232 | 264.3348688 | 264.3350528 | 264.316136 | 264.3035264 | 264.0774192 | 261.0638824 |
| 264.335232 | 264.3348688 | 264.3360528 | 264.316136 | 264.3035264 | 264.0754192 | 261.0648824 |
| 264.335232 | 264.3338688 | 264.3350528 | 264.316136 | 264.3035264 | 264.0744192 | 261.0638824 |
| 264.333232 | 264.3338688 | 264.3350528 | 264.316136 | 264.3035264 | 264.0774192 | 261.0638824 |
| 264.334232 | 264.3318688 | 264.3350528 | 264.316136 | 264.3035264 | 264.0744192 | 261.0618824 |
| 264.335232 | 264.3328688 | 264.3370528 | 264.316136 | 264.3035264 | 264.0784192 | 261.0648824 |
| 264.335232 | 264.3338688 | 264.3360528 | 264.314136 | 264.3035264 | 264.0734192 | 261.0648824 |
| 264.333232 | 264.3328688 | 264.3360528 | 264.317136 | 264.3045264 | 264.0794192 | 261.0648824 |
| 264.334232 | 264.3328688 | 264.3380528 | 264.315136 | 264.3015264 | 264.0784192 | 261.0648824 |
| 264.334232 | 264.3328688 | 264.3340528 | 264.317136 | 264.3025264 | 264.0764192 | 261.0628824 |
| 264.334232 | 264.3328688 | 264.3360528 | 264.317136 | 264.3045264 | 264.0804192 | 261.0648824 |
| 264.334232 | 264.3328688 | 264.3340528 | 264.315136 | 264.3005264 | 264.0744192 | 261.0628824 |
| 264.334232 | 264.3358688 | 264.3360528 | 264.318136 | 264.3015264 | 264.0754192 | 261.0638824 |
| 264.334232 | 264.3318688 | 264.3350528 | 264.314136 | 264.3015264 | 264.0734192 | 261.0638824 |
| 264.336232 | 264.3338688 | 264.3370528 | 264.316136 | 264.3015264 | 264.0804192 | 261.0638824 |
| 264.333232 | 264.3338688 | 264.3350528 | 264.316136 | 264.3045264 | 264.0784192 | 261.0638824 |
| 264.335232 | 264.3328688 | 264.3350528 | 264.315136 | 264.3025264 | 264.0754192 | 261.0628824 |
| 264.333232 | 264.3328688 | 264.3360528 | 264.317136 | 264.3025264 | 264.0754192 | 261.0618824 |
| 264.334232 | 264.3358688 | 264.3380528 | 264.317136 | 264.3015264 | 264.0804192 | 261.0648824 |
| 264.333232 | 264.3328688 | 264.3350528 | 264.317136 | 264.3005264 | 264.0754192 | 261.0628824 |
| 264.335232 | 264.3328688 | 264.3360528 | 264.316136 | 264.3015264 | 264.0784192 | 261.0628824 |
| 264.335232 | 264.3338688 | 264.3370528 | 264.316136 | 264.3015264 | 264.0784192 | 261.0638824 |
| 264.334232 | 264.3328688 | 264.3360528 | 264.315136 | 264.3015264 | 264.0784192 | 261.0628824 |
| 264.335232 | 264.3338688 | 264.3370528 | 264.315136 | 264.3015264 | 264.0764192 | 261.0628824 |
| 264.332232 | 264.3328688 | 264.3360528 | 264.315136 | 264.2995264 | 264.0744192 | 261.0628824 |
| 264.335232 | 264.3358688 | 264.3350528 | 264.318136 | 264.3045264 | 264.0794192 | 261.0638824 |
| 264.333232 | 264.3308688 | 264.3340528 | 264.313136 | 264.2995264 | 264.0764192 | 261.0608824 |
| 264.333232 | 264.3338688 | 264.3370528 | 264.314136 | 264.2995264 | 264.0774192 | 261.0618824 |
| 264.334232 | 264.3338688 | 264.3350528 | 264.314136 | 264.3025264 | 264.0754192 | 261.0638824 |
| 264.331232 | 264.3318688 | 264.3350528 | 264.312136 | 264.3005264 | 264.0754192 | 261.0598824 |
| 264.335232 | 264.3328688 | 264.3340528 | 264.314136 | 264.3015264 | 264.0784192 | 261.0608824 |

|            |             |             |            |             |             |             |
|------------|-------------|-------------|------------|-------------|-------------|-------------|
| 264.333232 | 264.3328688 | 264.3360528 | 264.312136 | 264.2995264 | 264.0764192 | 261.0628824 |
| 264.334232 | 264.3328688 | 264.3350528 | 264.316136 | 264.3025264 | 264.0734192 | 261.0638824 |
| 264.333232 | 264.3328688 | 264.3370528 | 264.316136 | 264.3025264 | 264.0774192 | 261.0638824 |
| 264.333232 | 264.3318688 | 264.3350528 | 264.313136 | 264.3015264 | 264.0724192 | 261.0628824 |
| 264.336232 | 264.3348688 | 264.3380528 | 264.316136 | 264.3035264 | 264.0764192 | 261.0658824 |
| 264.333232 | 264.3318688 | 264.3370528 | 264.313136 | 264.2995264 | 264.0744192 | 261.0648824 |
| 264.331232 | 264.3318688 | 264.3340528 | 264.313136 | 264.2995264 | 264.0744192 | 261.0648824 |
| 264.334232 | 264.3348688 | 264.3350528 | 264.315136 | 264.3025264 | 264.0754192 | 261.0658824 |
| 264.334232 | 264.3328688 | 264.3370528 | 264.315136 | 264.3025264 | 264.0754192 | 261.0638824 |
| 264.333232 | 264.3328688 | 264.3350528 | 264.315136 | 264.2995264 | 264.0754192 | 261.0628824 |
| 264.332232 | 264.3308688 | 264.3320528 | 264.314136 | 264.2985264 | 264.0734192 | 261.0618824 |
| 264.332232 | 264.3328688 | 264.3360528 | 264.315136 | 264.3015264 | 264.0784192 | 261.0628824 |
| 264.333232 | 264.3328688 | 264.3360528 | 264.314136 | 264.3015264 | 264.0764192 | 261.0628824 |
| 264.333232 | 264.3318688 | 264.3360528 | 264.315136 | 264.3015264 | 264.0784192 | 261.0628824 |
| 264.333232 | 264.3328688 | 264.3360528 | 264.315136 | 264.3015264 | 264.0764192 | 261.0628824 |
| 264.332232 | 264.3318688 | 264.3340528 | 264.312136 | 264.3005264 | 264.0764192 | 261.0628824 |
| 264.335232 | 264.3348688 | 264.3350528 | 264.315136 | 264.3025264 | 264.0774192 | 261.0658824 |
| 264.333232 | 264.3318688 | 264.3360528 | 264.314136 | 264.3015264 | 264.0744192 | 261.0628824 |
| 264.334232 | 264.3308688 | 264.3340528 | 264.314136 | 264.3005264 | 264.0744192 | 261.0628824 |
| 264.334232 | 264.3318688 | 264.3360528 | 264.315136 | 264.3015264 | 264.0764192 | 261.0628824 |
| 264.331232 | 264.3328688 | 264.3330528 | 264.313136 | 264.3005264 | 264.0724192 | 261.0638824 |
| 264.332232 | 264.3308688 | 264.3340528 | 264.313136 | 264.2995264 | 264.0714192 | 261.0628824 |
| 264.334232 | 264.3318688 | 264.3340528 | 264.315136 | 264.2985264 | 264.0734192 | 261.0628824 |
| 264.333232 | 264.3328688 | 264.3360528 | 264.314136 | 264.3005264 | 264.0754192 | 261.0628824 |
| 264.333232 | 264.3338688 | 264.3340528 | 264.314136 | 264.3005264 | 264.0744192 | 261.0638824 |
| 264.332232 | 264.3308688 | 264.3340528 | 264.313136 | 264.3015264 | 264.0734192 | 261.0618824 |
| 264.332232 | 264.3298688 | 264.3350528 | 264.313136 | 264.3005264 | 264.0724192 | 261.0628824 |
| 264.333232 | 264.3318688 | 264.3320528 | 264.312136 | 264.2995264 | 264.0734192 | 261.0618824 |
| 264.333232 | 264.3318688 | 264.3340528 | 264.314136 | 264.2995264 | 264.0714192 | 261.0598824 |
| 264.334232 | 264.3328688 | 264.3360528 | 264.316136 | 264.3015264 | 264.0774192 | 261.0638824 |
| 264.334232 | 264.3318688 | 264.3350528 | 264.315136 | 264.3005264 | 264.0744192 | 261.0638824 |
| 264.333232 | 264.3328688 | 264.3360528 | 264.313136 | 264.3005264 | 264.0754192 | 261.0608824 |
| 264.332232 | 264.3308688 | 264.3330528 | 264.312136 | 264.2985264 | 264.0724192 | 261.0628824 |
| 264.333232 | 264.3298688 | 264.3340528 | 264.313136 | 264.3005264 | 264.0714192 | 261.0618824 |
| 264.332232 | 264.3288688 | 264.3330528 | 264.312136 | 264.2995264 | 264.0724192 | 261.0598824 |
| 264.332232 | 264.3308688 | 264.3350528 | 264.313136 | 264.2995264 | 264.0724192 | 261.0628824 |
| 264.333232 | 264.3308688 | 264.3360528 | 264.314136 | 264.2985264 | 264.0724192 | 261.0628824 |
| 264.332232 | 264.3308688 | 264.3350528 | 264.313136 | 264.3005264 | 264.0724192 | 261.0638824 |
| 264.333232 | 264.3298688 | 264.3340528 | 264.311136 | 264.2995264 | 264.0694192 | 261.0638824 |
| 264.332232 | 264.3308688 | 264.3320528 | 264.314136 | 264.2975264 | 264.0704192 | 261.0628824 |
| 264.332232 | 264.3318688 | 264.3350528 | 264.314136 | 264.3015264 | 264.0774192 | 261.0648824 |
| 264.333232 | 264.3308688 | 264.3360528 | 264.313136 | 264.3005264 | 264.0744192 | 261.0618824 |
| 264.332232 | 264.3318688 | 264.3330528 | 264.313136 | 264.2985264 | 264.0744192 | 261.0638824 |
| 264.331232 | 264.3318688 | 264.3340528 | 264.315136 | 264.3015264 | 264.0774192 | 261.0618824 |
| 264.332232 | 264.3308688 | 264.3340528 | 264.314136 | 264.3005264 | 264.0714192 | 261.0648824 |
| 264.332232 | 264.3308688 | 264.3350528 | 264.314136 | 264.3005264 | 264.0714192 | 261.0638824 |
| 264.333232 | 264.3328688 | 264.3340528 | 264.313136 | 264.3015264 | 264.0704192 | 261.0628824 |

|            |             |             |            |             |             |             |
|------------|-------------|-------------|------------|-------------|-------------|-------------|
| 264.332232 | 264.3298688 | 264.3340528 | 264.312136 | 264.2995264 | 264.0744192 | 261.0618824 |
| 264.333232 | 264.3318688 | 264.3350528 | 264.312136 | 264.3025264 | 264.0734192 | 261.0648824 |
| 264.333232 | 264.3328688 | 264.3350528 | 264.315136 | 264.3025264 | 264.0744192 | 261.0638824 |
| 264.331232 | 264.3288688 | 264.3310528 | 264.311136 | 264.2985264 | 264.0714192 | 261.0608824 |
| 264.330232 | 264.3278688 | 264.3300528 | 264.312136 | 264.2975264 | 264.0684192 | 261.0618824 |
| 264.333232 | 264.3308688 | 264.3340528 | 264.313136 | 264.3005264 | 264.0744192 | 261.0628824 |
| 264.329232 | 264.3288688 | 264.3330528 | 264.312136 | 264.2985264 | 264.0704192 | 261.0608824 |
| 264.328232 | 264.3288688 | 264.3330528 | 264.312136 | 264.2985264 | 264.0704192 | 261.0608824 |
| 264.332232 | 264.3308688 | 264.3340528 | 264.313136 | 264.2985264 | 264.0724192 | 261.0638824 |
| 264.330232 | 264.3308688 | 264.3320528 | 264.313136 | 264.2985264 | 264.0734192 | 261.0608824 |
| 264.331232 | 264.3288688 | 264.3330528 | 264.312136 | 264.2975264 | 264.0704192 | 261.0598824 |
| 264.332232 | 264.3308688 | 264.3340528 | 264.315136 | 264.3005264 | 264.0694192 | 261.0628824 |
| 264.329232 | 264.3288688 | 264.3310528 | 264.312136 | 264.2975264 | 264.0704192 | 261.0618824 |
| 264.331232 | 264.3318688 | 264.3340528 | 264.313136 | 264.3005264 | 264.0754192 | 261.0648824 |
| 264.331232 | 264.3308688 | 264.3340528 | 264.313136 | 264.3005264 | 264.0734192 | 261.0648824 |
| 264.332232 | 264.3308688 | 264.3340528 | 264.315136 | 264.2975264 | 264.0734192 | 261.0628824 |
| 264.334232 | 264.3338688 | 264.3340528 | 264.315136 | 264.3005264 | 264.0784192 | 261.0638824 |
| 264.332232 | 264.3308688 | 264.3320528 | 264.313136 | 264.2995264 | 264.0714192 | 261.0628824 |
| 264.331232 | 264.3308688 | 264.3330528 | 264.313136 | 264.2995264 | 264.0734192 | 261.0628824 |
| 264.332232 | 264.3308688 | 264.3330528 | 264.314136 | 264.2995264 | 264.0724192 | 261.0638824 |
| 264.331232 | 264.3298688 | 264.3320528 | 264.311136 | 264.2985264 | 264.0734192 | 261.0618824 |
| 264.331232 | 264.3318688 | 264.3320528 | 264.312136 | 264.2985264 | 264.0714192 | 261.0618824 |
| 264.329232 | 264.3298688 | 264.3340528 | 264.313136 | 264.2995264 | 264.0714192 | 261.0638824 |
| 264.331232 | 264.3318688 | 264.3340528 | 264.314136 | 264.2995264 | 264.0734192 | 261.0628824 |
| 264.332232 | 264.3328688 | 264.3360528 | 264.314136 | 264.3005264 | 264.0734192 | 261.0638824 |
| 264.331232 | 264.3318688 | 264.3340528 | 264.314136 | 264.3005264 | 264.0714192 | 261.0628824 |
| 264.332232 | 264.3288688 | 264.3330528 | 264.313136 | 264.2985264 | 264.0704192 | 261.0628824 |
| 264.331232 | 264.3318688 | 264.3330528 | 264.315136 | 264.2995264 | 264.0744192 | 261.0608824 |
| 264.332232 | 264.3308688 | 264.3320528 | 264.313136 | 264.2995264 | 264.0734192 | 261.0628824 |
| 264.331232 | 264.3308688 | 264.3330528 | 264.314136 | 264.2985264 | 264.0714192 | 261.0638824 |
| 264.329232 | 264.3308688 | 264.3340528 | 264.312136 | 264.2985264 | 264.0714192 | 261.0638824 |
| 264.329232 | 264.3278688 | 264.3310528 | 264.312136 | 264.2965264 | 264.0704192 | 261.0618824 |
| 264.331232 | 264.3298688 | 264.3340528 | 264.314136 | 264.3025264 | 264.0714192 | 261.0648824 |
| 264.329232 | 264.3308688 | 264.3330528 | 264.314136 | 264.2985264 | 264.0724192 | 261.0638824 |
| 264.331232 | 264.3328688 | 264.3350528 | 264.314136 | 264.3005264 | 264.0724192 | 261.0638824 |
| 264.332232 | 264.3318688 | 264.3350528 | 264.313136 | 264.2995264 | 264.0734192 | 261.0628824 |
| 264.331232 | 264.3298688 | 264.3320528 | 264.313136 | 264.2995264 | 264.0714192 | 261.0628824 |
| 264.331232 | 264.3318688 | 264.3340528 | 264.313136 | 264.2995264 | 264.0714192 | 261.0648824 |
| 264.331232 | 264.3318688 | 264.3330528 | 264.313136 | 264.2985264 | 264.0734192 | 261.0628824 |
| 264.331232 | 264.3318688 | 264.3330528 | 264.315136 | 264.2985264 | 264.0724192 | 261.0628824 |
| 264.330232 | 264.3308688 | 264.3350528 | 264.314136 | 264.2995264 | 264.0734192 | 261.0638824 |
| 264.329232 | 264.3308688 | 264.3340528 | 264.313136 | 264.2985264 | 264.0744192 | 261.0628824 |
| 264.330232 | 264.3278688 | 264.3330528 | 264.313136 | 264.2965264 | 264.0724192 | 261.0628824 |
| 264.330232 | 264.3298688 | 264.3320528 | 264.313136 | 264.2985264 | 264.0714192 | 261.0628824 |
| 264.331232 | 264.3318688 | 264.3320528 | 264.312136 | 264.2975264 | 264.0734192 | 261.0628824 |
| 264.331232 | 264.3318688 | 264.3340528 | 264.312136 | 264.2995264 | 264.0734192 | 261.0628824 |
| 264.331232 | 264.3318688 | 264.3340528 | 264.315136 | 264.2995264 | 264.0714192 | 261.0628824 |

|            |             |             |            |             |             |             |
|------------|-------------|-------------|------------|-------------|-------------|-------------|
| 264.334232 | 264.3328688 | 264.3340528 | 264.313136 | 264.3005264 | 264.0774192 | 261.0628824 |
| 264.331232 | 264.3308688 | 264.3330528 | 264.312136 | 264.2995264 | 264.0764192 | 261.0618824 |
| 264.332232 | 264.3308688 | 264.3330528 | 264.314136 | 264.3005264 | 264.0784192 | 261.0618824 |
| 264.334232 | 264.3338688 | 264.3350528 | 264.316136 | 264.3005264 | 264.0754192 | 261.0638824 |
| 264.333232 | 264.3328688 | 264.3340528 | 264.316136 | 264.3005264 | 264.0754192 | 261.0638824 |
| 264.333232 | 264.3328688 | 264.3340528 | 264.315136 | 264.3015264 | 264.0814192 | 261.0648824 |
| 264.333232 | 264.3338688 | 264.3340528 | 264.317136 | 264.3025264 | 264.0814192 | 261.0648824 |
| 264.333232 | 264.3328688 | 264.3350528 | 264.315136 | 264.3015264 | 264.0764192 | 261.0628824 |
| 264.334232 | 264.3318688 | 264.3350528 | 264.315136 | 264.3015264 | 264.0804192 | 261.0618824 |
| 264.334232 | 264.3328688 | 264.3370528 | 264.317136 | 264.3035264 | 264.0764192 | 261.0638824 |
| 264.332232 | 264.3328688 | 264.3350528 | 264.317136 | 264.3025264 | 264.0804192 | 261.0648824 |
| 264.331232 | 264.3338688 | 264.3340528 | 264.316136 | 264.3025264 | 264.0774192 | 261.0638824 |
| 264.330232 | 264.3318688 | 264.3330528 | 264.313136 | 264.3015264 | 264.0764192 | 261.0608824 |
| 264.332232 | 264.3338688 | 264.3330528 | 264.315136 | 264.3015264 | 264.0764192 | 261.0628824 |
| 264.330232 | 264.3338688 | 264.3350528 | 264.315136 | 264.3015264 | 264.0754192 | 261.0628824 |
| 264.329232 | 264.3328688 | 264.3340528 | 264.315136 | 264.3005264 | 264.0754192 | 261.0628824 |
| 264.330232 | 264.3308688 | 264.3330528 | 264.314136 | 264.3005264 | 264.0744192 | 261.0638824 |
| 264.333232 | 264.3328688 | 264.3340528 | 264.315136 | 264.3025264 | 264.0754192 | 261.0668824 |
| 264.330232 | 264.3298688 | 264.3310528 | 264.312136 | 264.2975264 | 264.0734192 | 261.0618824 |
| 264.333232 | 264.3328688 | 264.3340528 | 264.315136 | 264.3005264 | 264.0744192 | 261.0638824 |
| 264.330232 | 264.3328688 | 264.3330528 | 264.312136 | 264.2995264 | 264.0704192 | 261.0638824 |
| 264.330232 | 264.3298688 | 264.3310528 | 264.314136 | 264.2975264 | 264.0694192 | 261.0618824 |
| 264.330232 | 264.3318688 | 264.3330528 | 264.314136 | 264.2995264 | 264.0744192 | 261.0618824 |
| 264.332232 | 264.3328688 | 264.3330528 | 264.314136 | 264.3005264 | 264.0734192 | 261.0638824 |
| 264.332232 | 264.3318688 | 264.3350528 | 264.313136 | 264.2995264 | 264.0734192 | 261.0638824 |
| 264.332232 | 264.3318688 | 264.3350528 | 264.313136 | 264.2995264 | 264.0754192 | 261.0638824 |
| 264.331232 | 264.3318688 | 264.3340528 | 264.316136 | 264.2995264 | 264.0734192 | 261.0638824 |
| 264.333232 | 264.3338688 | 264.3370528 | 264.318136 | 264.3015264 | 264.0774192 | 261.0638824 |
| 264.330232 | 264.3308688 | 264.3330528 | 264.314136 | 264.2975264 | 264.0734192 | 261.0618824 |
| 264.331232 | 264.3328688 | 264.3310528 | 264.314136 | 264.3015264 | 264.0734192 | 261.0638824 |
| 264.329232 | 264.3308688 | 264.3340528 | 264.314136 | 264.2995264 | 264.0734192 | 261.0618824 |
| 264.331232 | 264.3308688 | 264.3340528 | 264.314136 | 264.2995264 | 264.0734192 | 261.0638824 |
| 264.329232 | 264.3308688 | 264.3340528 | 264.314136 | 264.2995264 | 264.0754192 | 261.0608824 |
| 264.331232 | 264.3328688 | 264.3350528 | 264.315136 | 264.3015264 | 264.0754192 | 261.0638824 |
| 264.331232 | 264.3308688 | 264.3320528 | 264.312136 | 264.2995264 | 264.0754192 | 261.0618824 |
| 264.330232 | 264.3298688 | 264.3320528 | 264.313136 | 264.2985264 | 264.0724192 | 261.0608824 |
| 264.330232 | 264.3298688 | 264.3310528 | 264.313136 | 264.2965264 | 264.0714192 | 261.0608824 |
| 264.329232 | 264.3298688 | 264.3310528 | 264.313136 | 264.2955264 | 264.0754192 | 261.0598824 |
| 264.330232 | 264.3298688 | 264.3320528 | 264.311136 | 264.2985264 | 264.0724192 | 261.0608824 |
| 264.330232 | 264.3318688 | 264.3320528 | 264.311136 | 264.2985264 | 264.0724192 | 261.0638824 |
| 264.329232 | 264.3308688 | 264.3310528 | 264.312136 | 264.2985264 | 264.0734192 | 261.0608824 |
| 264.332232 | 264.3318688 | 264.3350528 | 264.316136 | 264.3005264 | 264.0734192 | 261.0628824 |
| 264.331232 | 264.3338688 | 264.3330528 | 264.315136 | 264.3005264 | 264.0734192 | 261.0608824 |
| 264.332232 | 264.3348688 | 264.3350528 | 264.315136 | 264.3005264 | 264.0754192 | 261.0628824 |
| 264.328232 | 264.3308688 | 264.3290528 | 264.311136 | 264.2965264 | 264.0704192 | 261.0588824 |
| 264.329232 | 264.3318688 | 264.3300528 | 264.312136 | 264.2975264 | 264.0724192 | 261.0598824 |
| 264.331232 | 264.3318688 | 264.3310528 | 264.313136 | 264.2975264 | 264.0684192 | 261.0608824 |



|            |             |             |            |             |             |             |
|------------|-------------|-------------|------------|-------------|-------------|-------------|
| 264.331232 | 264.3328688 | 264.3330528 | 264.315136 | 264.3005264 | 264.0734192 | 261.0648824 |
| 264.332232 | 264.3328688 | 264.3330528 | 264.313136 | 264.3005264 | 264.0734192 | 261.0648824 |
| 264.332232 | 264.3318688 | 264.3320528 | 264.314136 | 264.2985264 | 264.0744192 | 261.0628824 |
| 264.331232 | 264.3318688 | 264.3310528 | 264.313136 | 264.2985264 | 264.0714192 | 261.0608824 |
| 264.332232 | 264.3328688 | 264.3320528 | 264.312136 | 264.3005264 | 264.0744192 | 261.0628824 |
| 264.329232 | 264.3298688 | 264.3330528 | 264.313136 | 264.2985264 | 264.0714192 | 261.0608824 |
| 264.330232 | 264.3298688 | 264.3320528 | 264.312136 | 264.2985264 | 264.0714192 | 261.0608824 |
| 264.331232 | 264.3308688 | 264.3340528 | 264.314136 | 264.2995264 | 264.0724192 | 261.0618824 |
| 264.331232 | 264.3298688 | 264.3330528 | 264.313136 | 264.2985264 | 264.0734192 | 261.0608824 |
| 264.329232 | 264.3298688 | 264.3320528 | 264.311136 | 264.2995264 | 264.0704192 | 261.0628824 |
| 264.330232 | 264.3308688 | 264.3340528 | 264.313136 | 264.2975264 | 264.0704192 | 261.0638824 |
| 264.332232 | 264.3308688 | 264.3330528 | 264.312136 | 264.2995264 | 264.0734192 | 261.0618824 |
| 264.330232 | 264.3308688 | 264.3340528 | 264.314136 | 264.2995264 | 264.0734192 | 261.0638824 |
| 264.332232 | 264.3308688 | 264.3340528 | 264.312136 | 264.2995264 | 264.0674192 | 261.0618824 |
| 264.330232 | 264.3288688 | 264.3320528 | 264.312136 | 264.2975264 | 264.0704192 | 261.0618824 |
| 264.328232 | 264.3288688 | 264.3340528 | 264.312136 | 264.2975264 | 264.0724192 | 261.0618824 |
| 264.328232 | 264.3288688 | 264.3320528 | 264.312136 | 264.2975264 | 264.0724192 | 261.0618824 |
| 264.333232 | 264.3318688 | 264.3340528 | 264.313136 | 264.2995264 | 264.0744192 | 261.0628824 |
| 264.330232 | 264.3288688 | 264.3320528 | 264.312136 | 264.2975264 | 264.0704192 | 261.0638824 |
| 264.329232 | 264.3298688 | 264.3350528 | 264.313136 | 264.2995264 | 264.0744192 | 261.0628824 |
| 264.332232 | 264.3318688 | 264.3360528 | 264.313136 | 264.3015264 | 264.0744192 | 261.0638824 |
| 264.330232 | 264.3318688 | 264.3360528 | 264.312136 | 264.2975264 | 264.0724192 | 261.0638824 |
| 264.330232 | 264.3288688 | 264.3320528 | 264.313136 | 264.2995264 | 264.0724192 | 261.0638824 |
| 264.330232 | 264.3318688 | 264.3320528 | 264.313136 | 264.2975264 | 264.0744192 | 261.0618824 |
| 264.330232 | 264.3308688 | 264.3330528 | 264.312136 | 264.2985264 | 264.0694192 | 261.0618824 |
| 264.331232 | 264.3318688 | 264.3350528 | 264.313136 | 264.2995264 | 264.0724192 | 261.0618824 |
| 264.330232 | 264.3338688 | 264.3340528 | 264.313136 | 264.2975264 | 264.0684192 | 261.0638824 |
| 264.329232 | 264.3318688 | 264.3340528 | 264.311136 | 264.2995264 | 264.0724192 | 261.0618824 |
| 264.331232 | 264.3318688 | 264.3350528 | 264.313136 | 264.2995264 | 264.0724192 | 261.0628824 |
| 264.330232 | 264.3288688 | 264.3320528 | 264.312136 | 264.2975264 | 264.0684192 | 261.0618824 |
| 264.328232 | 264.3288688 | 264.3310528 | 264.310136 | 264.2945264 | 264.0714192 | 261.0598824 |
| 264.330232 | 264.3288688 | 264.3320528 | 264.312136 | 264.2975264 | 264.0704192 | 261.0618824 |
| 264.330232 | 264.3288688 | 264.3320528 | 264.312136 | 264.2975264 | 264.0724192 | 261.0618824 |
| 264.330232 | 264.3288688 | 264.3340528 | 264.314136 | 264.2985264 | 264.0714192 | 261.0618824 |
| 264.330232 | 264.3288688 | 264.3340528 | 264.312136 | 264.2985264 | 264.0744192 | 261.0638824 |
| 264.330232 | 264.3308688 | 264.3310528 | 264.312136 | 264.2985264 | 264.0714192 | 261.0598824 |
| 264.329232 | 264.3298688 | 264.3340528 | 264.313136 | 264.2975264 | 264.0734192 | 261.0628824 |
| 264.330232 | 264.3308688 | 264.3320528 | 264.310136 | 264.2975264 | 264.0704192 | 261.0588824 |
| 264.329232 | 264.3288688 | 264.3320528 | 264.311136 | 264.2975264 | 264.0704192 | 261.0598824 |
| 264.331232 | 264.3298688 | 264.3350528 | 264.313136 | 264.2985264 | 264.0694192 | 261.0608824 |
| 264.331232 | 264.3318688 | 264.3310528 | 264.313136 | 264.2985264 | 264.0694192 | 261.0608824 |
| 264.331232 | 264.3298688 | 264.3330528 | 264.311136 | 264.2985264 | 264.0714192 | 261.0608824 |
| 264.331232 | 264.3298688 | 264.3330528 | 264.311136 | 264.2965264 | 264.0694192 | 261.0608824 |
| 264.331232 | 264.3318688 | 264.3330528 | 264.311136 | 264.2985264 | 264.0714192 | 261.0608824 |
| 264.331232 | 264.3298688 | 264.3320528 | 264.311136 | 264.2955264 | 264.0704192 | 261.0618824 |
| 264.329232 | 264.3298688 | 264.3340528 | 264.313136 | 264.2975264 | 264.0724192 | 261.0598824 |
| 264.331232 | 264.3298688 | 264.3320528 | 264.311136 | 264.2975264 | 264.0734192 | 261.0618824 |

|            |             |             |            |             |             |             |
|------------|-------------|-------------|------------|-------------|-------------|-------------|
| 264.330232 | 264.3308688 | 264.3300528 | 264.312136 | 264.2975264 | 264.0704192 | 261.0598824 |
| 264.330232 | 264.3308688 | 264.3320528 | 264.312136 | 264.2995264 | 264.0704192 | 261.0598824 |
| 264.330232 | 264.3308688 | 264.3320528 | 264.312136 | 264.2975264 | 264.0724192 | 261.0618824 |
| 264.330232 | 264.3308688 | 264.3340528 | 264.310136 | 264.2975264 | 264.0724192 | 261.0598824 |
| 264.330232 | 264.3288688 | 264.3320528 | 264.312136 | 264.2955264 | 264.0704192 | 261.0588824 |
| 264.329232 | 264.3298688 | 264.3320528 | 264.311136 | 264.2975264 | 264.0704192 | 261.0578824 |
| 264.331232 | 264.3298688 | 264.3310528 | 264.313136 | 264.2985264 | 264.0734192 | 261.0598824 |
| 264.332232 | 264.3298688 | 264.3330528 | 264.311136 | 264.2965264 | 264.0714192 | 261.0598824 |
| 264.331232 | 264.3268688 | 264.3320528 | 264.311136 | 264.2975264 | 264.0704192 | 261.0578824 |
| 264.331232 | 264.3298688 | 264.3330528 | 264.311136 | 264.2965264 | 264.0734192 | 261.0598824 |
| 264.329232 | 264.3268688 | 264.3310528 | 264.311136 | 264.2965264 | 264.0714192 | 261.0578824 |
| 264.330232 | 264.3278688 | 264.3330528 | 264.311136 | 264.2985264 | 264.0714192 | 261.0608824 |
| 264.330232 | 264.3298688 | 264.3340528 | 264.312136 | 264.2995264 | 264.0704192 | 261.0608824 |
| 264.328232 | 264.3278688 | 264.3310528 | 264.311136 | 264.2975264 | 264.0674192 | 261.0588824 |
| 264.331232 | 264.3278688 | 264.3320528 | 264.312136 | 264.2995264 | 264.0714192 | 261.0598824 |
| 264.332232 | 264.3258688 | 264.3310528 | 264.312136 | 264.2975264 | 264.0734192 | 261.0598824 |
| 264.330232 | 264.3288688 | 264.3320528 | 264.311136 | 264.2995264 | 264.0704192 | 261.0608824 |
| 264.332232 | 264.3278688 | 264.3330528 | 264.312136 | 264.2985264 | 264.0734192 | 261.0618824 |
| 264.330232 | 264.3278688 | 264.3310528 | 264.311136 | 264.2985264 | 264.0714192 | 261.0588824 |
| 264.329232 | 264.3278688 | 264.3330528 | 264.310136 | 264.2965264 | 264.0704192 | 261.0588824 |
| 264.331232 | 264.3298688 | 264.3310528 | 264.310136 | 264.2985264 | 264.0744192 | 261.0598824 |
| 264.330232 | 264.3288688 | 264.3320528 | 264.311136 | 264.2955264 | 264.0734192 | 261.0608824 |
| 264.333232 | 264.3298688 | 264.3310528 | 264.313136 | 264.2985264 | 264.0724192 | 261.0588824 |
| 264.330232 | 264.3288688 | 264.3320528 | 264.312136 | 264.2985264 | 264.0754192 | 261.0608824 |
| 264.330232 | 264.3278688 | 264.3300528 | 264.312136 | 264.2975264 | 264.0694192 | 261.0598824 |
| 264.332232 | 264.3288688 | 264.3320528 | 264.311136 | 264.2985264 | 264.0734192 | 261.0598824 |
| 264.333232 | 264.3308688 | 264.3330528 | 264.314136 | 264.3015264 | 264.0724192 | 261.0618824 |
| 264.329232 | 264.3288688 | 264.3310528 | 264.314136 | 264.2975264 | 264.0704192 | 261.0608824 |
| 264.333232 | 264.3318688 | 264.3350528 | 264.316136 | 264.3015264 | 264.0784192 | 261.0628824 |
| 264.331232 | 264.3298688 | 264.3320528 | 264.313136 | 264.3005264 | 264.0744192 | 261.0618824 |
| 264.333232 | 264.3298688 | 264.3330528 | 264.313136 | 264.2995264 | 264.0744192 | 261.0608824 |
| 264.331232 | 264.3298688 | 264.3340528 | 264.313136 | 264.2975264 | 264.0704192 | 261.0598824 |
| 264.330232 | 264.3288688 | 264.3350528 | 264.312136 | 264.2985264 | 264.0714192 | 261.0618824 |
| 264.329232 | 264.3288688 | 264.3310528 | 264.312136 | 264.2985264 | 264.0704192 | 261.0618824 |
| 264.330232 | 264.3298688 | 264.3320528 | 264.315136 | 264.2995264 | 264.0684192 | 261.0598824 |
| 264.331232 | 264.3318688 | 264.3340528 | 264.314136 | 264.2975264 | 264.0744192 | 261.0608824 |
| 264.332232 | 264.3328688 | 264.3350528 | 264.314136 | 264.3005264 | 264.0734192 | 261.0608824 |
| 264.332232 | 264.3298688 | 264.3330528 | 264.312136 | 264.2985264 | 264.0734192 | 261.0588824 |
| 264.330232 | 264.3308688 | 264.3340528 | 264.312136 | 264.2985264 | 264.0714192 | 261.0608824 |
| 264.333232 | 264.3308688 | 264.3350528 | 264.315136 | 264.3005264 | 264.0724192 | 261.0618824 |
| 264.331232 | 264.3288688 | 264.3350528 | 264.313136 | 264.2975264 | 264.0724192 | 261.0598824 |
| 264.331232 | 264.3318688 | 264.3330528 | 264.313136 | 264.2975264 | 264.0744192 | 261.0618824 |
| 264.332232 | 264.3318688 | 264.3340528 | 264.314136 | 264.2985264 | 264.0714192 | 261.0628824 |
| 264.333232 | 264.3318688 | 264.3340528 | 264.316136 | 264.2975264 | 264.0724192 | 261.0618824 |
| 264.333232 | 264.3308688 | 264.3330528 | 264.314136 | 264.2995264 | 264.0754192 | 261.0618824 |
| 264.331232 | 264.3278688 | 264.3320528 | 264.313136 | 264.2965264 | 264.0694192 | 261.0608824 |
| 264.329232 | 264.3298688 | 264.3330528 | 264.312136 | 264.2975264 | 264.0754192 | 261.0618824 |

|            |             |             |            |             |             |             |
|------------|-------------|-------------|------------|-------------|-------------|-------------|
| 264.332232 | 264.3328688 | 264.3340528 | 264.313136 | 264.3005264 | 264.0754192 | 261.0618824 |
| 264.332232 | 264.3318688 | 264.3340528 | 264.311136 | 264.2985264 | 264.0734192 | 261.0598824 |
| 264.330232 | 264.3308688 | 264.3320528 | 264.311136 | 264.2965264 | 264.0734192 | 261.0598824 |
| 264.331232 | 264.3308688 | 264.3340528 | 264.314136 | 264.2975264 | 264.0764192 | 261.0608824 |
| 264.332232 | 264.3328688 | 264.3350528 | 264.315136 | 264.2985264 | 264.0774192 | 261.0638824 |
| 264.331232 | 264.3318688 | 264.3320528 | 264.314136 | 264.2975264 | 264.0734192 | 261.0608824 |
| 264.332232 | 264.3318688 | 264.3330528 | 264.314136 | 264.2985264 | 264.0734192 | 261.0618824 |
| 264.332232 | 264.3318688 | 264.3330528 | 264.313136 | 264.2985264 | 264.0744192 | 261.0638824 |
| 264.330232 | 264.3318688 | 264.3330528 | 264.313136 | 264.2985264 | 264.0734192 | 261.0618824 |
| 264.329232 | 264.3268688 | 264.3300528 | 264.310136 | 264.2955264 | 264.0714192 | 261.0588824 |
| 264.331232 | 264.3298688 | 264.3320528 | 264.312136 | 264.2985264 | 264.0704192 | 261.0618824 |
| 264.328232 | 264.3288688 | 264.3310528 | 264.312136 | 264.2965264 | 264.0714192 | 261.0588824 |
| 264.329232 | 264.3298688 | 264.3340528 | 264.315136 | 264.2995264 | 264.0744192 | 261.0618824 |
| 264.328232 | 264.3268688 | 264.3310528 | 264.312136 | 264.2965264 | 264.0734192 | 261.0568824 |
| 264.333232 | 264.3298688 | 264.3320528 | 264.313136 | 264.2975264 | 264.0744192 | 261.0618824 |
| 264.329232 | 264.3278688 | 264.3300528 | 264.312136 | 264.2965264 | 264.0744192 | 261.0598824 |
| 264.332232 | 264.3308688 | 264.3330528 | 264.313136 | 264.2995264 | 264.0734192 | 261.0618824 |
| 264.329232 | 264.3278688 | 264.3300528 | 264.311136 | 264.2975264 | 264.0744192 | 261.0618824 |
| 264.331232 | 264.3298688 | 264.3300528 | 264.311136 | 264.2975264 | 264.0724192 | 261.0588824 |
| 264.331232 | 264.3298688 | 264.3320528 | 264.313136 | 264.2975264 | 264.0724192 | 261.0598824 |
| 264.332232 | 264.3318688 | 264.3330528 | 264.314136 | 264.3005264 | 264.0734192 | 261.0628824 |
| 264.330232 | 264.3308688 | 264.3330528 | 264.314136 | 264.2975264 | 264.0734192 | 261.0608824 |
| 264.330232 | 264.3288688 | 264.3310528 | 264.312136 | 264.2975264 | 264.0714192 | 261.0608824 |
| 264.330232 | 264.3308688 | 264.3310528 | 264.312136 | 264.2975264 | 264.0734192 | 261.0578824 |
| 264.332232 | 264.3308688 | 264.3310528 | 264.314136 | 264.2975264 | 264.0734192 | 261.0598824 |
| 264.330232 | 264.3278688 | 264.3310528 | 264.312136 | 264.2975264 | 264.0734192 | 261.0578824 |
| 264.330232 | 264.3308688 | 264.3310528 | 264.314136 | 264.2975264 | 264.0714192 | 261.0598824 |
| 264.331232 | 264.3308688 | 264.3340528 | 264.314136 | 264.3005264 | 264.0744192 | 261.0628824 |
| 264.329232 | 264.3308688 | 264.3320528 | 264.312136 | 264.2985264 | 264.0724192 | 261.0588824 |
| 264.330232 | 264.3318688 | 264.3330528 | 264.313136 | 264.2995264 | 264.0734192 | 261.0618824 |
| 264.329232 | 264.3318688 | 264.3330528 | 264.313136 | 264.2975264 | 264.0734192 | 261.0618824 |
| 264.329232 | 264.3308688 | 264.3300528 | 264.312136 | 264.2965264 | 264.0704192 | 261.0608824 |
| 264.329232 | 264.3308688 | 264.3320528 | 264.312136 | 264.2985264 | 264.0724192 | 261.0628824 |
| 264.330232 | 264.3318688 | 264.3330528 | 264.313136 | 264.2995264 | 264.0754192 | 261.0618824 |
| 264.332232 | 264.3298688 | 264.3310528 | 264.313136 | 264.2995264 | 264.0734192 | 261.0638824 |
| 264.328232 | 264.3298688 | 264.3310528 | 264.312136 | 264.2955264 | 264.0694192 | 261.0618824 |
| 264.330232 | 264.3318688 | 264.3320528 | 264.313136 | 264.2955264 | 264.0744192 | 261.0598824 |
| 264.329232 | 264.3298688 | 264.3320528 | 264.313136 | 264.2975264 | 264.0724192 | 261.0598824 |
| 264.328232 | 264.3288688 | 264.3310528 | 264.310136 | 264.2975264 | 264.0714192 | 261.0598824 |
| 264.329232 | 264.3298688 | 264.3320528 | 264.313136 | 264.2975264 | 264.0724192 | 261.0598824 |
| 264.328232 | 264.3298688 | 264.3320528 | 264.311136 | 264.2975264 | 264.0704192 | 261.0598824 |
| 264.328232 | 264.3278688 | 264.3320528 | 264.310136 | 264.2975264 | 264.0724192 | 261.0588824 |
| 264.329232 | 264.3298688 | 264.3320528 | 264.313136 | 264.2985264 | 264.0724192 | 261.0608824 |
| 264.330232 | 264.3298688 | 264.3330528 | 264.312136 | 264.2985264 | 264.0754192 | 261.0598824 |
| 264.330232 | 264.3308688 | 264.3310528 | 264.312136 | 264.2975264 | 264.0734192 | 261.0608824 |
| 264.326232 | 264.3258688 | 264.3310528 | 264.312136 | 264.2965264 | 264.0744192 | 261.0588824 |
| 264.329232 | 264.3308688 | 264.3320528 | 264.312136 | 264.2975264 | 264.0744192 | 261.0608824 |

|            |             |             |            |             |             |             |
|------------|-------------|-------------|------------|-------------|-------------|-------------|
| 264.331232 | 264.3308688 | 264.3320528 | 264.311136 | 264.2965264 | 264.0724192 | 261.0598824 |
| 264.331232 | 264.3318688 | 264.3340528 | 264.314136 | 264.2975264 | 264.0744192 | 261.0598824 |
| 264.333232 | 264.3318688 | 264.3360528 | 264.314136 | 264.2995264 | 264.0764192 | 261.0628824 |
| 264.331232 | 264.3298688 | 264.3320528 | 264.312136 | 264.2975264 | 264.0704192 | 261.0628824 |
| 264.330232 | 264.3338688 | 264.3350528 | 264.315136 | 264.3005264 | 264.0784192 | 261.0618824 |
| 264.332232 | 264.3328688 | 264.3350528 | 264.313136 | 264.3015264 | 264.0764192 | 261.0618824 |
| 264.330232 | 264.3308688 | 264.3330528 | 264.312136 | 264.2985264 | 264.0764192 | 261.0608824 |
| 264.334232 | 264.3338688 | 264.3350528 | 264.314136 | 264.3005264 | 264.0804192 | 261.0658824 |
| 264.332232 | 264.3318688 | 264.3340528 | 264.314136 | 264.3005264 | 264.0754192 | 261.0648824 |
| 264.331232 | 264.3318688 | 264.3340528 | 264.313136 | 264.2985264 | 264.0734192 | 261.0628824 |
| 264.332232 | 264.3318688 | 264.3330528 | 264.314136 | 264.2985264 | 264.0754192 | 261.0648824 |
| 264.331232 | 264.3318688 | 264.3350528 | 264.315136 | 264.2995264 | 264.0764192 | 261.0628824 |
| 264.330232 | 264.3298688 | 264.3330528 | 264.314136 | 264.2985264 | 264.0764192 | 261.0628824 |
| 264.330232 | 264.3298688 | 264.3310528 | 264.312136 | 264.2965264 | 264.0724192 | 261.0628824 |
| 264.331232 | 264.3298688 | 264.3310528 | 264.312136 | 264.2965264 | 264.0714192 | 261.0598824 |
| 264.329232 | 264.3318688 | 264.3310528 | 264.312136 | 264.2975264 | 264.0744192 | 261.0608824 |
| 264.331232 | 264.3298688 | 264.3320528 | 264.313136 | 264.2975264 | 264.0734192 | 261.0618824 |
| 264.329232 | 264.3298688 | 264.3320528 | 264.312136 | 264.2955264 | 264.0724192 | 261.0608824 |
| 264.332232 | 264.3308688 | 264.3330528 | 264.314136 | 264.2975264 | 264.0764192 | 261.0628824 |
| 264.333232 | 264.3318688 | 264.3330528 | 264.314136 | 264.2985264 | 264.0704192 | 261.0628824 |
| 264.331232 | 264.3308688 | 264.3320528 | 264.314136 | 264.2985264 | 264.0744192 | 261.0628824 |
| 264.331232 | 264.3308688 | 264.3320528 | 264.313136 | 264.2965264 | 264.0684192 | 261.0628824 |
| 264.332232 | 264.3308688 | 264.3320528 | 264.314136 | 264.2975264 | 264.0734192 | 261.0628824 |
| 264.330232 | 264.3318688 | 264.3320528 | 264.314136 | 264.2995264 | 264.0734192 | 261.0608824 |
| 264.335232 | 264.3318688 | 264.3330528 | 264.316136 | 264.2985264 | 264.0744192 | 261.0618824 |
| 264.330232 | 264.3298688 | 264.3320528 | 264.314136 | 264.2975264 | 264.0734192 | 261.0628824 |
| 264.331232 | 264.3318688 | 264.3310528 | 264.312136 | 264.2975264 | 264.0744192 | 261.0618824 |
| 264.333232 | 264.3318688 | 264.3330528 | 264.313136 | 264.2985264 | 264.0764192 | 261.0618824 |
| 264.328232 | 264.3288688 | 264.3300528 | 264.312136 | 264.2975264 | 264.0734192 | 261.0608824 |
| 264.332232 | 264.3308688 | 264.3320528 | 264.315136 | 264.2985264 | 264.0724192 | 261.0618824 |
| 264.333232 | 264.3298688 | 264.3310528 | 264.313136 | 264.2985264 | 264.0744192 | 261.0618824 |
| 264.332232 | 264.3308688 | 264.3320528 | 264.311136 | 264.2985264 | 264.0734192 | 261.0598824 |
| 264.332232 | 264.3288688 | 264.3320528 | 264.311136 | 264.2985264 | 264.0714192 | 261.0598824 |
| 264.331232 | 264.3278688 | 264.3290528 | 264.310136 | 264.2965264 | 264.0704192 | 261.0588824 |
| 264.329232 | 264.3278688 | 264.3310528 | 264.310136 | 264.2965264 | 264.0714192 | 261.0588824 |
| 264.332232 | 264.3288688 | 264.3320528 | 264.313136 | 264.2975264 | 264.0754192 | 261.0598824 |
| 264.330232 | 264.3308688 | 264.3320528 | 264.314136 | 264.2975264 | 264.0734192 | 261.0598824 |
| 264.331232 | 264.3318688 | 264.3320528 | 264.314136 | 264.2995264 | 264.0764192 | 261.0608824 |
| 264.330232 | 264.3308688 | 264.3320528 | 264.314136 | 264.2975264 | 264.0754192 | 261.0618824 |
| 264.331232 | 264.3308688 | 264.3320528 | 264.314136 | 264.2975264 | 264.0764192 | 261.0608824 |
| 264.331232 | 264.3308688 | 264.3330528 | 264.314136 | 264.2995264 | 264.0744192 | 261.0608824 |
| 264.330232 | 264.3308688 | 264.3320528 | 264.314136 | 264.2975264 | 264.0784192 | 261.0608824 |
| 264.333232 | 264.3308688 | 264.3320528 | 264.314136 | 264.2975264 | 264.0744192 | 261.0608824 |
| 264.332232 | 264.3308688 | 264.3320528 | 264.313136 | 264.2995264 | 264.0754192 | 261.0598824 |
| 264.330232 | 264.3278688 | 264.3310528 | 264.313136 | 264.2985264 | 264.0734192 | 261.0598824 |
| 264.332232 | 264.3288688 | 264.3310528 | 264.313136 | 264.2995264 | 264.0734192 | 261.0598824 |
| 264.332232 | 264.3308688 | 264.3340528 | 264.313136 | 264.3015264 | 264.0734192 | 261.0618824 |

|            |             |             |            |             |             |             |
|------------|-------------|-------------|------------|-------------|-------------|-------------|
| 264.331232 | 264.3308688 | 264.3320528 | 264.313136 | 264.2995264 | 264.0744192 | 261.0608824 |
| 264.332232 | 264.3308688 | 264.3340528 | 264.311136 | 264.2995264 | 264.0734192 | 261.0598824 |
| 264.332232 | 264.3278688 | 264.3320528 | 264.309136 | 264.2995264 | 264.0714192 | 261.0598824 |
| 264.332232 | 264.3288688 | 264.3340528 | 264.313136 | 264.2985264 | 264.0734192 | 261.0618824 |
| 264.330232 | 264.3288688 | 264.3320528 | 264.311136 | 264.2965264 | 264.0714192 | 261.0598824 |
| 264.331232 | 264.3308688 | 264.3320528 | 264.312136 | 264.2975264 | 264.0724192 | 261.0608824 |
| 264.330232 | 264.3288688 | 264.3320528 | 264.313136 | 264.2965264 | 264.0714192 | 261.0588824 |
| 264.329232 | 264.3298688 | 264.3310528 | 264.310136 | 264.2965264 | 264.0724192 | 261.0588824 |
| 264.330232 | 264.3308688 | 264.3320528 | 264.314136 | 264.2985264 | 264.0734192 | 261.0618824 |
| 264.331232 | 264.3288688 | 264.3320528 | 264.312136 | 264.2975264 | 264.0764192 | 261.0598824 |
| 264.329232 | 264.3278688 | 264.3310528 | 264.310136 | 264.2955264 | 264.0704192 | 261.0588824 |
| 264.330232 | 264.3308688 | 264.3320528 | 264.312136 | 264.2975264 | 264.0734192 | 261.0618824 |
| 264.330232 | 264.3288688 | 264.3320528 | 264.312136 | 264.2995264 | 264.0714192 | 261.0618824 |
| 264.328232 | 264.3288688 | 264.3310528 | 264.311136 | 264.2975264 | 264.0714192 | 261.0598824 |
| 264.328232 | 264.3288688 | 264.3310528 | 264.311136 | 264.2975264 | 264.0714192 | 261.0598824 |
| 264.330232 | 264.3288688 | 264.3320528 | 264.312136 | 264.2975264 | 264.0754192 | 261.0598824 |
| 264.328232 | 264.3288688 | 264.3300528 | 264.311136 | 264.2975264 | 264.0694192 | 261.0598824 |
| 264.331232 | 264.3308688 | 264.3330528 | 264.314136 | 264.2975264 | 264.0724192 | 261.0608824 |
| 264.330232 | 264.3288688 | 264.3330528 | 264.315136 | 264.2985264 | 264.0734192 | 261.0618824 |
| 264.330232 | 264.3298688 | 264.3300528 | 264.313136 | 264.2985264 | 264.0714192 | 261.0608824 |
| 264.331232 | 264.3298688 | 264.3320528 | 264.313136 | 264.2975264 | 264.0734192 | 261.0598824 |
| 264.328232 | 264.3278688 | 264.3300528 | 264.313136 | 264.2955264 | 264.0734192 | 261.0588824 |
| 264.331232 | 264.3308688 | 264.3310528 | 264.314136 | 264.2995264 | 264.0724192 | 261.0598824 |
| 264.331232 | 264.3308688 | 264.3310528 | 264.314136 | 264.2985264 | 264.0724192 | 261.0618824 |
| 264.329232 | 264.3298688 | 264.3290528 | 264.312136 | 264.2955264 | 264.0704192 | 261.0598824 |
| 264.330232 | 264.3288688 | 264.3300528 | 264.312136 | 264.2965264 | 264.0694192 | 261.0598824 |
| 264.329232 | 264.3308688 | 264.3300528 | 264.313136 | 264.2965264 | 264.0694192 | 261.0628824 |
| 264.329232 | 264.3288688 | 264.3300528 | 264.313136 | 264.2965264 | 264.0714192 | 261.0588824 |
| 264.329232 | 264.3308688 | 264.3320528 | 264.312136 | 264.2965264 | 264.0714192 | 261.0608824 |
| 264.329232 | 264.3288688 | 264.3310528 | 264.313136 | 264.2975264 | 264.0724192 | 261.0588824 |
| 264.327232 | 264.3288688 | 264.3280528 | 264.312136 | 264.2945264 | 264.0714192 | 261.0578824 |
| 264.329232 | 264.3268688 | 264.3300528 | 264.312136 | 264.2955264 | 264.0724192 | 261.0588824 |
| 264.332232 | 264.3288688 | 264.3310528 | 264.313136 | 264.2975264 | 264.0734192 | 261.0588824 |
| 264.331232 | 264.3318688 | 264.3320528 | 264.314136 | 264.2985264 | 264.0734192 | 261.0618824 |
| 264.331232 | 264.3308688 | 264.3320528 | 264.312136 | 264.2995264 | 264.0744192 | 261.0608824 |
| 264.331232 | 264.3298688 | 264.3300528 | 264.314136 | 264.2985264 | 264.0734192 | 261.0618824 |
| 264.331232 | 264.3298688 | 264.3290528 | 264.314136 | 264.2985264 | 264.0714192 | 261.0618824 |
| 264.331232 | 264.3298688 | 264.3300528 | 264.312136 | 264.2965264 | 264.0734192 | 261.0598824 |
| 264.333232 | 264.3318688 | 264.3300528 | 264.314136 | 264.2965264 | 264.0724192 | 261.0618824 |
| 264.331232 | 264.3298688 | 264.3310528 | 264.313136 | 264.2985264 | 264.0734192 | 261.0618824 |
| 264.333232 | 264.3298688 | 264.3300528 | 264.314136 | 264.2985264 | 264.0724192 | 261.0618824 |
| 264.333232 | 264.3318688 | 264.3320528 | 264.314136 | 264.2985264 | 264.0744192 | 261.0618824 |
| 264.333232 | 264.3318688 | 264.3320528 | 264.316136 | 264.2985264 | 264.0744192 | 261.0618824 |
| 264.331232 | 264.3318688 | 264.3300528 | 264.316136 | 264.2985264 | 264.0744192 | 261.0618824 |
| 264.331232 | 264.3298688 | 264.3320528 | 264.316136 | 264.2985264 | 264.0714192 | 261.0598824 |
| 264.331232 | 264.3298688 | 264.3310528 | 264.314136 | 264.2985264 | 264.0714192 | 261.0598824 |
| 264.330232 | 264.3288688 | 264.3310528 | 264.313136 | 264.2955264 | 264.0684192 | 261.0588824 |

|            |             |             |            |             |             |             |
|------------|-------------|-------------|------------|-------------|-------------|-------------|
| 264.330232 | 264.3288688 | 264.3310528 | 264.313136 | 264.2975264 | 264.0714192 | 261.0608824 |
| 264.330232 | 264.3288688 | 264.3330528 | 264.313136 | 264.2975264 | 264.0704192 | 261.0608824 |
| 264.329232 | 264.3288688 | 264.3300528 | 264.312136 | 264.2955264 | 264.0704192 | 261.0608824 |
| 264.332232 | 264.3318688 | 264.3310528 | 264.315136 | 264.2985264 | 264.0754192 | 261.0608824 |
| 264.331232 | 264.3308688 | 264.3280528 | 264.313136 | 264.2965264 | 264.0704192 | 261.0608824 |
| 264.329232 | 264.3308688 | 264.3300528 | 264.313136 | 264.2975264 | 264.0724192 | 261.0588824 |
| 264.331232 | 264.3308688 | 264.3320528 | 264.315136 | 264.2965264 | 264.0724192 | 261.0608824 |
| 264.330232 | 264.3308688 | 264.3310528 | 264.313136 | 264.2975264 | 264.0744192 | 261.0638824 |
| 264.329232 | 264.3318688 | 264.3320528 | 264.313136 | 264.2975264 | 264.0744192 | 261.0588824 |
| 264.331232 | 264.3318688 | 264.3320528 | 264.312136 | 264.2995264 | 264.0764192 | 261.0598824 |
| 264.333232 | 264.3338688 | 264.3330528 | 264.315136 | 264.3015264 | 264.0764192 | 261.0638824 |
| 264.332232 | 264.3298688 | 264.3310528 | 264.316136 | 264.2985264 | 264.0734192 | 261.0598824 |
| 264.331232 | 264.3298688 | 264.3310528 | 264.314136 | 264.2995264 | 264.0744192 | 261.0598824 |
| 264.334232 | 264.3328688 | 264.3330528 | 264.316136 | 264.3005264 | 264.0754192 | 261.0628824 |
| 264.331232 | 264.3318688 | 264.3320528 | 264.316136 | 264.2975264 | 264.0764192 | 261.0598824 |
| 264.332232 | 264.3328688 | 264.3330528 | 264.314136 | 264.3005264 | 264.0754192 | 261.0618824 |
| 264.332232 | 264.3328688 | 264.3350528 | 264.318136 | 264.3005264 | 264.0754192 | 261.0638824 |
| 264.332232 | 264.3298688 | 264.3320528 | 264.315136 | 264.2985264 | 264.0754192 | 261.0608824 |
| 264.332232 | 264.3318688 | 264.3320528 | 264.313136 | 264.2975264 | 264.0754192 | 261.0618824 |
| 264.332232 | 264.3318688 | 264.3320528 | 264.313136 | 264.2975264 | 264.0754192 | 261.0618824 |
| 264.332232 | 264.3318688 | 264.3320528 | 264.313136 | 264.2975264 | 264.0754192 | 261.0608824 |
| 264.330232 | 264.3298688 | 264.3320528 | 264.313136 | 264.2965264 | 264.0734192 | 261.0608824 |
| 264.333232 | 264.3328688 | 264.3320528 | 264.315136 | 264.3015264 | 264.0734192 | 261.0618824 |
| 264.333232 | 264.3328688 | 264.3320528 | 264.313136 | 264.2995264 | 264.0764192 | 261.0618824 |
| 264.333232 | 264.3328688 | 264.3330528 | 264.314136 | 264.3005264 | 264.0764192 | 261.0598824 |
| 264.333232 | 264.3348688 | 264.3320528 | 264.314136 | 264.2995264 | 264.0784192 | 261.0618824 |
| 264.333232 | 264.3328688 | 264.3320528 | 264.314136 | 264.2995264 | 264.0764192 | 261.0618824 |
| 264.332232 | 264.3328688 | 264.3300528 | 264.315136 | 264.2975264 | 264.0754192 | 261.0588824 |
| 264.333232 | 264.3328688 | 264.3320528 | 264.315136 | 264.2995264 | 264.0734192 | 261.0588824 |
| 264.334232 | 264.3328688 | 264.3310528 | 264.317136 | 264.3015264 | 264.0774192 | 261.0608824 |
| 264.334232 | 264.3338688 | 264.3310528 | 264.315136 | 264.2985264 | 264.0734192 | 261.0628824 |
| 264.334232 | 264.3338688 | 264.3330528 | 264.317136 | 264.2995264 | 264.0794192 | 261.0628824 |
| 264.333232 | 264.3318688 | 264.3330528 | 264.317136 | 264.2985264 | 264.0744192 | 261.0608824 |
| 264.333232 | 264.3318688 | 264.3320528 | 264.316136 | 264.2985264 | 264.0744192 | 261.0598824 |
| 264.334232 | 264.3338688 | 264.3310528 | 264.317136 | 264.3005264 | 264.0764192 | 261.0628824 |
| 264.332232 | 264.3328688 | 264.3300528 | 264.313136 | 264.2995264 | 264.0714192 | 261.0618824 |
| 264.333232 | 264.3328688 | 264.3300528 | 264.314136 | 264.2995264 | 264.0764192 | 261.0618824 |
| 264.333232 | 264.3328688 | 264.3300528 | 264.315136 | 264.2995264 | 264.0754192 | 261.0628824 |
| 264.335232 | 264.3338688 | 264.3330528 | 264.316136 | 264.3005264 | 264.0744192 | 261.0628824 |
| 264.334232 | 264.3308688 | 264.3290528 | 264.312136 | 264.2995264 | 264.0734192 | 261.0598824 |
| 264.334232 | 264.3338688 | 264.3320528 | 264.314136 | 264.2995264 | 264.0794192 | 261.0638824 |
| 264.336232 | 264.3338688 | 264.3320528 | 264.317136 | 264.3015264 | 264.0754192 | 261.0648824 |
| 264.336232 | 264.3358688 | 264.3350528 | 264.319136 | 264.3035264 | 264.0794192 | 261.0648824 |
| 264.331232 | 264.3328688 | 264.3320528 | 264.316136 | 264.3005264 | 264.0764192 | 261.0618824 |
| 264.333232 | 264.3318688 | 264.3320528 | 264.316136 | 264.3005264 | 264.0764192 | 261.0638824 |
