# Supplementary figures and images for: Understanding the hydrologic impacts of wastewater treatment plant discharge to shallow groundwater: before and after plant shutdown
Source: Royal Society of Chemistry journal article supplement (doi:10.1039/c6ew00128a), 2016-01-01

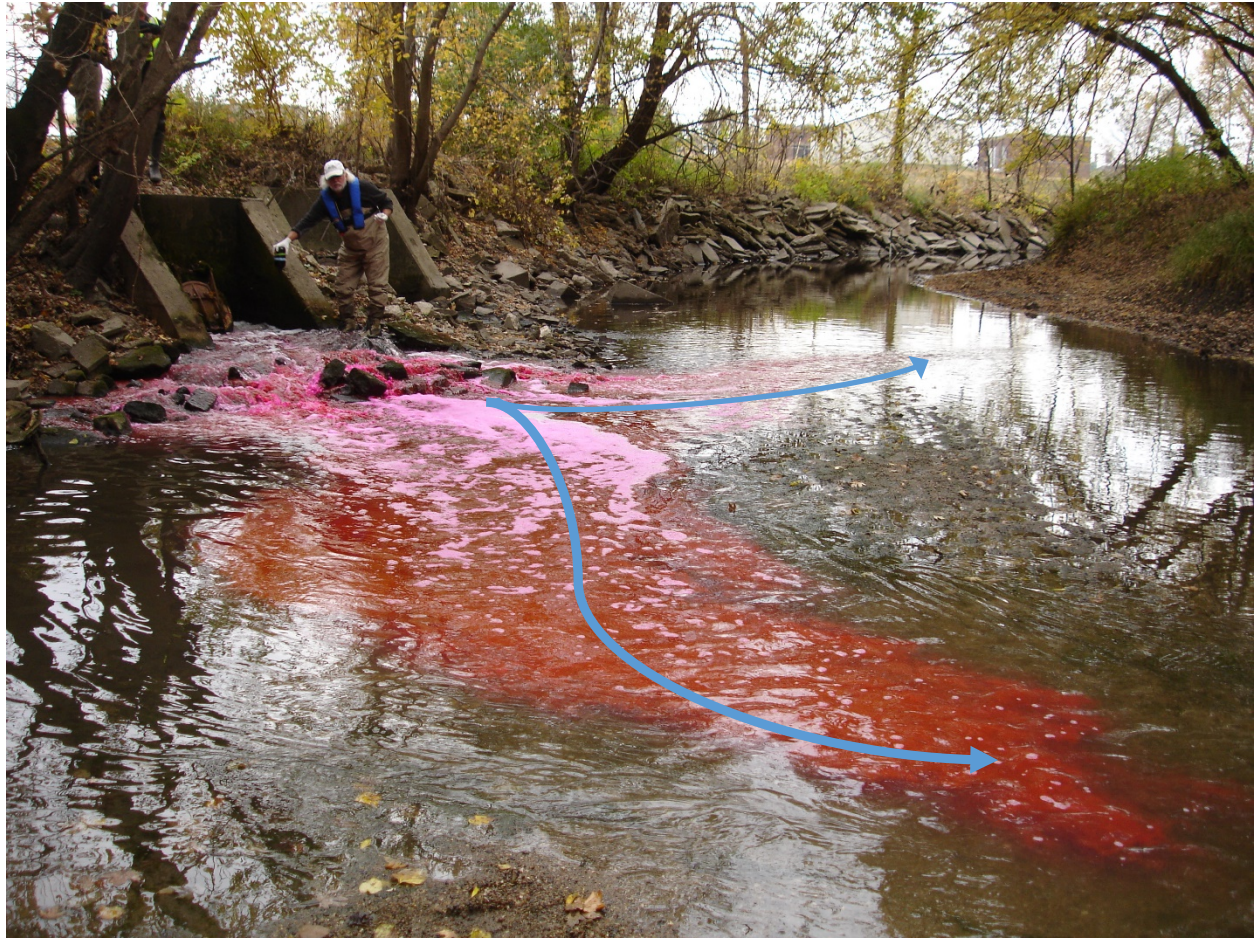

Supplement: c6ew00128a1.zip [file c6ew00128a1.zip]
